# Supplementary material
Source: PubMed Central journal article supplement (PMC7961212)
Supplement: NIHMS1671313-supplement-Data_file_S1.pdf [file NIHMS1671313-supplement-Data_file_S1.pdf]

## TAUvsControls

|                          | logFC               | logCPM             | LR                 |
|--------------------------|---------------------|--------------------|--------------------|
| <b>ZFP41:CCDS6397.1</b>  | <b>1.278868761</b>  | <b>1.776527286</b> | <b>41.33892611</b> |
| <b>NEK9:CCDS9839.1</b>   | <b>1.141071</b>     | <b>4.788839336</b> | <b>29.90055775</b> |
| <b>RASD2:CCDS13916.1</b> | <b>-0.877340851</b> | <b>1.412390945</b> | <b>9.223431852</b> |
| MUC16:CCDS54212.1        | -3.300136464        | 5.141504599        | 173.0562568        |
| XIRP2:CCDS42769.1        | -2.780484804        | 3.054299482        | 106.7810437        |
| XIRP2:CCDS56144.1        | -2.741749516        | 2.962304129        | 106.1362761        |
| FLG:CCDS30860.1          | -2.971196481        | 3.167333243        | 101.2461139        |
| ABCC3:CCDS32681.1        | -2.781793436        | 2.360828375        | 98.24945463        |
| SPTA1:CCDS41423.1        | -2.731515938        | 2.895098768        | 95.88023833        |
| CPB1:CCDS33874.1         | -3.48286015         | 1.960681421        | 95.55492028        |
| SCN10A:CCDS33736.1       | -2.664815909        | 2.470293732        | 94.90928693        |
| APOB:CCDS1703.1          | -2.696260685        | 3.45354921         | 93.30011952        |
| MUC17:CCDS34711.1        | -2.896610483        | 3.243321108        | 92.75485093        |
| STAB2:CCDS31888.1        | -2.244030519        | 3.137124322        | 91.75465076        |
| GPR112:CCDS35409.1       | -2.105288352        | 2.946982103        | 90.89558408        |
| LRR61:CCDS5901.1         | -2.687799691        | 1.859019987        | 90.68497643        |
| EPS8L3:CCDS815.1         | -2.807099813        | 2.037313757        | 89.14066933        |
| EPS8L3:CCDS814.1         | -2.806083952        | 2.034804229        | 89.0973727         |
| EPS8L3:CCDS813.1         | -2.789741071        | 2.008932675        | 87.35972273        |
| PKHD1:CCDS4935.1         | -1.68569605         | 3.418419013        | 86.03720608        |
| ZNF831:CCDS42894.1       | -2.729884581        | 1.958096138        | 84.28607256        |
| TUBA3C:CCDS9284.1        | -2.342356926        | 2.179107417        | 83.99952361        |
| PKHD1:CCDS4936.1         | -1.691034017        | 3.175716116        | 81.22242501        |
| WDR87:CCDS46063.1        | -2.554687898        | 2.88881298         | 80.5547298         |
| CD163:CCDS8578.1         | -2.151023082        | 1.825933228        | 80.37055059        |
| CD163:CCDS53742.1        | -2.148253046        | 1.801535278        | 80.07580481        |
| SI:CCDS3196.1            | -2.585396346        | 2.348255385        | 80.02477105        |
| CR1:CCDS44308.1          | -2.607345277        | 3.113308358        | 79.49678086        |
| MYO1A:CCDS8929.1         | -2.550943965        | 1.824872149        | 79.21444245        |
| ATP13A5:CCDS33914.1      | -2.592601109        | 1.874946838        | 79.05999396        |
| LRRN4:CCDS13097.1        | -2.671900386        | 1.718298314        | 78.32170871        |
| LAMB4:CCDS34732.1        | -2.862537012        | 2.899327125        | 77.3616535         |
| KRT3:CCDS44895.1         | -2.673485248        | 1.643740651        | 76.72156318        |
| ABCC12:CCDS10730.1       | -2.495879477        | 2.067752339        | 76.4824222         |
| USH2A:CCDS31025.1        | -2.936972129        | 3.729673358        | 76.15355174        |
| SEMG2:CCDS13346.1        | -3.117229438        | 1.254682018        | 75.78965163        |
| ZNF541:CCDS46133.1       | -2.521841695        | 1.99283815         | 75.70460467        |
| GSTT1:CCDS13822.1        | 2.043096659         | 3.832157269        | 75.62099308        |
| MYH4:CCDS11154.1         | -2.952935243        | 3.260435957        | 75.22064904        |
| TDRD6:CCDS34470.1        | -2.458058205        | 2.249683951        | 75.07617811        |
| TDRD6:CCDS55017.1        | -2.453476869        | 2.216586863        | 74.21708026        |
| MUC4:CCDS3311.1          | -2.622266233        | 1.892381667        | 72.87662456        |
| HRNR:CCDS30859.1         | -2.564581144        | 2.447126743        | 72.51956276        |
| TEX11:CCDS43968.1        | -2.559714313        | 2.154593953        | 72.42913115        |
| CR1:CCDS44309.1          | -2.514934121        | 2.795696051        | 72.20363225        |
| ROS1:CCDS5116.1          | -2.498613835        | 2.707571328        | 72.19698211        |
| PKD1L1:CCDS34633.1       | -1.674215688        | 3.254674687        | 72.18220364        |
| EMR3:CCDS12315.1         | -2.541599314        | 1.405934343        | 71.65168199        |
| MUC4:CCDS3310.1          | -2.582939555        | 1.980087777        | 71.63062047        |
| BNC1:CCDS10324.1         | -2.61163513         | 2.018491356        | 71.55833028        |

TAUvsControls

|                      |              |             |             |
|----------------------|--------------|-------------|-------------|
| MYO1G:CCDS34629.1    | -1.973900245 | 1.655937878 | 71.39295283 |
| CFTR:CCDS5773.1      | -2.455521483 | 2.213043906 | 71.36412064 |
| PKHD1L1:CCDS47911.1  | -2.005947921 | 3.593939159 | 71.22948958 |
| FLG2:CCDS30861.1     | -2.555866331 | 2.177039347 | 70.42594422 |
| AMPD1:CCDS53349.1    | -2.596808492 | 1.650545182 | 69.9057508  |
| HSD17B2:CCDS10936.1  | -2.389951773 | 2.443534733 | 69.76817339 |
| DNAH5:CCDS3882.1     | -1.474174424 | 3.684944497 | 69.63412579 |
| FAM186A:CCDS44878.1  | -1.991952526 | 2.265868206 | 69.61350822 |
| TDRD5:CCDS55663.1    | -2.202646757 | 1.815635249 | 69.32813406 |
| MUC4:CCDS54700.1     | -1.977670373 | 3.654394845 | 69.26236552 |
| TRPM6:CCDS55319.1    | -2.496602692 | 2.74029816  | 69.24703808 |
| BPIFB1:CCDS13218.1   | -2.884264109 | 1.031950177 | 69.01305559 |
| TRPM6:CCDS6647.1     | -2.49190434  | 2.7381875   | 69.01110504 |
| AMPD1:CCDS876.2      | -2.591733389 | 1.687030176 | 68.8466927  |
| TRPM6:CCDS55318.1    | -2.487447222 | 2.745183879 | 68.74194147 |
| PON1:CCDS5638.1      | -2.772298943 | 1.077838118 | 68.70174702 |
| ALS2CR11:CCDS54430.1 | -2.072910601 | 2.146116688 | 68.32555024 |
| MRGPRX1:CCDS7846.1   | -3.53323855  | 1.346546109 | 68.20341515 |
| KRT33B:CCDS11389.1   | -3.56039586  | 1.399541514 | 67.44733806 |
| ESYT3:CCDS3101.2     | -2.612908512 | 1.784327678 | 67.38873098 |
| ITGAM:CCDS45470.1    | -2.464544634 | 1.8997028   | 66.97277268 |
| ITGAM:CCDS54004.1    | -2.464544634 | 1.8997028   | 66.97277268 |
| USH2A:CCDS1516.1     | -2.535948724 | 2.095071019 | 66.95642106 |
| SLC22A9:CCDS8043.1   | -2.762450966 | 1.008689028 | 66.65748463 |
| ABCB11:CCDS46444.1   | -2.51921711  | 1.855252753 | 66.56978991 |
| ABCC3:CCDS45739.1    | -2.528736258 | 1.071640624 | 66.55768813 |
| DSG4:CCDS11897.1     | -2.584134122 | 1.791156796 | 66.30339541 |
| SLC12A1:CCDS10129.2  | -2.565091671 | 1.794180206 | 66.26469453 |
| TDRD5:CCDS1332.1     | -2.185079441 | 1.750350441 | 66.2543047  |
| FYB:CCDS54848.1      | -2.453952831 | 1.443151512 | 66.16695429 |
| PLB1:CCDS33168.1     | -1.671028432 | 2.796928075 | 66.03750523 |
| PNPLA5:CCDS14053.1   | -2.599467569 | 0.894516371 | 65.9623603  |
| FYB:CCDS47200.1      | -2.451556706 | 1.334106724 | 65.85475963 |
| PIK3C2G:CCDS44839.1  | -2.414557939 | 2.223992036 | 65.82221526 |
| ADCY10:CCDS1265.1    | -1.985288879 | 2.358210746 | 65.79319554 |
| SLC12A1:CCDS53940.1  | -2.586813787 | 1.814354663 | 65.71115112 |
| PLB1:CCDS54340.1     | -1.661442395 | 2.779426024 | 65.66910566 |
| WDFY4:CCDS44385.1    | -1.660853055 | 3.579300511 | 65.30144446 |
| SIX6:CCDS9747.1      | -4.348402647 | 3.474064617 | 65.20782461 |
| BTBD16:CCDS31301.1   | -2.540882369 | 0.869277768 | 65.15473575 |
| PLA2G4E:CCDS55962.1  | -2.539025591 | 1.819365326 | 64.75198735 |
| DSG4:CCDS45845.1     | -2.552484153 | 1.775687287 | 64.6905494  |
| PIWIL3:CCDS33623.1   | -2.4392832   | 1.597062098 | 64.20625024 |
| ATP8B4:CCDS32238.1   | -2.539103961 | 1.887160656 | 63.36121417 |
| ACSM5:CCDS10585.1    | -2.524380726 | 0.962862891 | 63.25045073 |
| RFX6:CCDS5113.1      | -2.481103234 | 1.314019139 | 63.15112584 |
| SMC1B:CCDS43027.1    | -2.440511123 | 1.939963398 | 63.06555144 |
| SLC15A1:CCDS9489.1   | -2.393315498 | 1.275704838 | 62.93190836 |
| NLRP5:CCDS12938.1    | -2.361127917 | 1.863983814 | 62.71191022 |
| CIITA:CCDS10544.1    | -1.841747506 | 1.933941967 | 62.60842795 |
| UROC1:CCDS54636.1    | -2.495811242 | 1.214489362 | 62.60748829 |

TAUvsControls

|                      |              |             |             |
|----------------------|--------------|-------------|-------------|
| FRMD7:CCDS35397.1    | -3.314179027 | 1.871983872 | 62.27092063 |
| MRGPRX3:CCDS7830.1   | -3.166389863 | 0.757178292 | 61.96099868 |
| LILRB5:CCDS12885.1   | -2.468609858 | 1.153526434 | 61.7839065  |
| MST1R:CCDS2807.1     | -1.436596126 | 2.19952346  | 61.68936866 |
| ALS2CR11:CCDS2349.1  | -2.428397707 | 1.184689851 | 61.61962976 |
| CATSPERB:CCDS32142.1 | -2.385279255 | 1.531321991 | 61.61773062 |
| DSPP:CCDS43248.1     | -2.552170171 | 1.353541027 | 61.55998436 |
| LILRB5:CCDS46176.1   | -2.463318556 | 1.156924477 | 61.43830213 |
| ABCB5:CCDS55090.1    | -2.326297599 | 1.867232012 | 60.86189095 |
| SIGLEC7:CCDS12826.1  | -2.523531883 | 1.059032498 | 60.59353405 |
| HEPHL1:CCDS44710.1   | -2.327437086 | 1.690040365 | 60.5190128  |
| UBASH3A:CCDS13687.1  | -2.352341468 | 1.26898695  | 60.04937133 |
| CD22:CCDS54249.1     | -2.402424524 | 1.509244012 | 59.94024528 |
| HOPX:CCDS3507.1      | -3.290622202 | 1.744943718 | 59.90717617 |
| UBASH3A:CCDS33566.1  | -2.351271005 | 1.175845513 | 59.88674582 |
| SYCP2:CCDS13482.1    | -2.436600968 | 2.513910955 | 59.75500027 |
| EYS:CCDS47445.1      | -1.938616992 | 3.085109899 | 59.59012705 |
| ANKRD30A:CCDS7193.1  | -2.336464685 | 2.11325358  | 59.58963695 |
| FAM194B:CCDS45045.1  | -2.47369755  | 1.293126514 | 59.58187666 |
| RGS22:CCDS43758.1    | -2.445446665 | 2.236339045 | 59.54902874 |
| CD300LF:CCDS11704.1  | -2.604218644 | 0.911154722 | 59.35809853 |
| PLA2G4D:CCDS32203.1  | -2.447291429 | 1.312516201 | 59.30090765 |
| FCRL3:CCDS1167.1     | -2.370136474 | 1.411945676 | 59.18193604 |
| HOPX:CCDS47062.1     | -3.232120243 | 1.914000507 | 59.10201324 |
| FAM47C:CCDS35227.1   | -2.411494083 | 1.270644755 | 59.1000632  |
| XIRP2:CCDS56143.1    | -2.401827528 | 1.502793057 | 58.96829053 |
| TGM6:CCDS13025.1     | -2.425212213 | 1.402400649 | 58.90309996 |
| SLCO6A1:CCDS34206.1  | -2.415164233 | 1.256551444 | 58.87075013 |
| ITGB6:CCDS2212.1     | -2.378101035 | 1.296094489 | 58.75001117 |
| MRGPRX4:CCDS7831.1   | -2.972718115 | 0.839431591 | 58.74440942 |
| SYCP1:CCDS879.1      | -2.537266843 | 1.980928237 | 58.62855423 |
| GOLGA6L6:CCDS45184.1 | -2.384861237 | 1.303748901 | 58.61796863 |
| CACNA2D4:CCDS44785.1 | -2.330608463 | 2.505262424 | 58.55297533 |
| TLX1:CCDS55725.1     | -2.799937963 | 0.425930878 | 58.34976317 |
| TRPM1:CCDS10024.2    | -1.862923058 | 2.728324792 | 58.32403616 |
| DSG1:CCDS11896.1     | -2.352060188 | 1.558565459 | 58.26792695 |
| ABCC2:CCDS7484.1     | -1.497809987 | 2.254068301 | 58.20933967 |
| UROC1:CCDS3038.1     | -2.442409725 | 1.105630181 | 58.08900348 |
| ZNF366:CCDS4015.1    | -2.409213338 | 1.13726694  | 58.06528664 |
| DDX53:CCDS35214.1    | -2.435059516 | 0.58485996  | 57.98289163 |
| SLC26A8:CCDS4813.1   | -2.43431786  | 1.73894948  | 57.76392333 |
| SLC26A5:CCDS5733.1   | -2.45742848  | 1.605274105 | 57.64194747 |
| FAT2:CCDS4317.1      | -1.281223368 | 3.400505724 | 57.52907816 |
| RARRES1:CCDS3184.1   | -2.082992781 | 0.713869368 | 57.47614386 |
| LILRB1:CCDS42617.1   | -2.346908594 | 1.50216282  | 57.44044985 |
| FCAMR:CCDS53468.1    | -2.381801479 | 0.901009291 | 57.42201053 |
| BPIFC:CCDS13906.1    | -2.508340594 | 0.992304567 | 57.3474626  |
| OASL:CCDS9211.1      | -2.447924511 | 0.841111722 | 57.10256815 |
| LILRB1:CCDS42615.1   | -2.343335148 | 1.513255719 | 57.10256229 |
| ALS2CR11:CCDS54429.1 | -2.407109882 | 0.920418887 | 57.08875272 |
| PCDHB1:CCDS4243.1    | -2.390947358 | 0.692607047 | 56.79815922 |

## TAUvsControls

|                      |              |             |             |
|----------------------|--------------|-------------|-------------|
| CYP4A22:CCDS30707.1  | -2.335857572 | 1.148241567 | 56.78985587 |
| XIRP2:CCDS42768.1    | -2.392802891 | 1.43922069  | 56.78698882 |
| AIM1:CCDS34506.1     | -1.957058943 | 2.233287621 | 56.78626168 |
| TNIP3:CCDS3718.1     | -2.603962658 | 0.925064573 | 56.76393292 |
| LILRB1:CCDS42616.1   | -2.34050654  | 1.506459082 | 56.71490376 |
| SLC26A5:CCDS55150.1  | -2.406845385 | 1.525893686 | 56.66041672 |
| SPRR2F:CCDS30867.1   | -3.602881137 | 0.228967922 | 56.64707588 |
| MORC1:CCDS2955.1     | -2.380837595 | 1.876674799 | 56.54792821 |
| MFRP:CCDS8421.1      | -1.465765285 | 1.291377396 | 56.5175124  |
| KRT4:CCDS41787.2     | -2.578025279 | 1.33833275  | 56.51738292 |
| CCDC158:CCDS43242.1  | -2.371423534 | 1.77639718  | 56.41236127 |
| LILRB1:CCDS42614.1   | -2.337046613 | 1.517521223 | 56.38380237 |
| CDCP1:CCDS2727.1     | -1.522148277 | 1.621013447 | 56.24936079 |
| HSPB7:CCDS30611.1    | -3.677476096 | 2.155887528 | 56.24625212 |
| PNPLA5:CCDS54537.1   | -2.488892025 | 0.448895454 | 56.24584287 |
| CCDC129:CCDS5435.2   | -2.320968712 | 1.58549193  | 56.16626715 |
| CD93:CCDS13149.1     | -2.402355044 | 0.674860604 | 55.84312725 |
| EVPL:CCDS11737.1     | -1.680380607 | 2.442471722 | 55.8195941  |
| KRT31:CCDS11391.1    | -3.136887199 | 0.938740881 | 55.70782553 |
| PDILT:CCDS10584.1    | -2.509469874 | 0.833478814 | 55.70316867 |
| OR51Q1:CCDS31381.1   | -2.604784424 | 0.197728434 | 55.70025465 |
| RXFP2:CCDS53862.1    | -2.594436105 | 1.522816534 | 55.66720096 |
| SIGLEC9:CCDS12825.1  | -2.439990947 | 0.605747096 | 55.62449278 |
| TRPV5:CCDS5875.1     | -2.40042632  | 1.119908539 | 55.53208597 |
| AADA2L2:CCDS3161.2   | -2.509217178 | 0.235074594 | 55.48821038 |
| RORC:CCDS1004.1      | -1.905750392 | 0.662446542 | 55.41531782 |
| LCT:CCDS2178.1       | -1.668134727 | 2.214228965 | 55.32367175 |
| TAS1R2:CCDS187.1     | -2.339193944 | 1.161042903 | 55.22386638 |
| F11:CCDS3847.1       | -2.358124771 | 1.016488566 | 55.22299596 |
| SLC22A6:CCDS44631.1  | -2.444977912 | 0.592960493 | 55.19875521 |
| SIGLEC6:CCDS12834.3  | -2.442452307 | 0.676371312 | 55.19706755 |
| GRM6:CCDS4442.1      | -2.446658734 | 1.202295136 | 55.07018308 |
| PTPRB:CCDS44943.1    | -1.46680057  | 3.038231706 | 55.0086116  |
| CNGA2:CCDS14701.1    | -2.398343735 | 0.908358698 | 55.00464175 |
| ITGAD:CCDS32438.1    | -2.283509619 | 1.936491173 | 54.92414578 |
| AGXT:CCDS2543.1      | -2.495565518 | 0.456027623 | 54.90425497 |
| SLC22A10:CCDS41661.1 | -2.585713816 | 1.814610325 | 54.88636319 |
| ZFY:CCDS48201.1      | -1.757283377 | 1.482583201 | 54.83859601 |
| CEACAM16:CCDS54278.1 | -2.460431495 | 0.273387833 | 54.83398721 |
| TGM4:CCDS2723.1      | -2.338241087 | 1.005758135 | 54.70701923 |
| PTPRB:CCDS44944.1    | -1.484039377 | 2.926135519 | 54.63442733 |
| SLC22A6:CCDS31591.1  | -2.404672595 | 0.710799308 | 54.59556803 |
| PARP15:CCDS46893.1   | -2.330594624 | 1.158547332 | 54.59529669 |
| LRMP:CCDS8701.1      | -2.313442688 | 1.130855256 | 54.53719849 |
| TYRP1:CCDS34990.1    | -1.894414178 | 1.756923878 | 54.5308472  |
| CETP:CCDS10772.1     | -2.459022879 | 1.11822399  | 54.52926141 |
| ADCY10:CCDS53426.1   | -1.837426875 | 2.046590563 | 54.5027193  |
| LILRB5:CCDS42611.1   | -2.375993661 | 0.970272411 | 54.46390431 |
| SCTR:CCDS2127.1      | -2.348647097 | 0.835692455 | 54.39986411 |
| ABCA6:CCDS11683.1    | -2.466903193 | 2.413954314 | 54.34321419 |
| SPOCD1:CCDS347.1     | -1.424860886 | 2.091805319 | 54.32887566 |

## TAUvsControls

|                      |              |              |             |
|----------------------|--------------|--------------|-------------|
| TRDN:CCDS55053.1     | -2.595112601 | 2.173615109  | 54.18182767 |
| ADAM32:CCDS47846.1   | -2.318259119 | 1.713680307  | 54.14269592 |
| SLC4A1:CCDS11481.1   | -1.920048833 | 1.99694595   | 54.0812153  |
| ZNF804B:CCDS5613.1   | -2.26766006  | 1.595534044  | 53.98712394 |
| SLC22A6:CCDS44632.1  | -2.420130631 | 0.571485309  | 53.93874538 |
| ADAM7:CCDS6045.1     | -2.383479165 | 1.925105589  | 53.92448942 |
| C6orf132:CCDS47428.1 | -1.499600962 | 1.559120375  | 53.87785636 |
| NLRP8:CCDS12937.1    | -2.303599966 | 1.516220861  | 53.8653135  |
| KRT76:CCDS8838.1     | -2.384527284 | 1.546335207  | 53.86504988 |
| T:CCDS5290.1         | -2.377915361 | 0.797107717  | 53.84791446 |
| PIK3CG:CCDS5739.1    | -2.312739593 | 1.445713003  | 53.8182257  |
| USP29:CCDS33124.1    | -2.356324605 | 0.906942084  | 53.76319874 |
| CAPN13:CCDS46252.1   | -2.320622269 | 1.199524668  | 53.76086128 |
| CDH19:CCDS11994.1    | -2.410799493 | 1.289127721  | 53.75857526 |
| MX2:CCDS13672.1      | -2.285703702 | 1.056661913  | 53.75529377 |
| CDH16:CCDS10823.1    | -2.309193463 | 1.437311895  | 53.72406949 |
| KCNJ15:CCDS13656.1   | -2.455230729 | 0.159966677  | 53.69635772 |
| SIGLEC6:CCDS12835.3  | -2.432357474 | 0.59102552   | 53.61985191 |
| SLC2A7:CCDS98.2      | -2.402712334 | 0.720264251  | 53.52245048 |
| KCNU1:CCDS55220.1    | -1.939556196 | 1.977421175  | 53.52223373 |
| SLC22A6:CCDS8041.1   | -2.380949599 | 0.691089843  | 53.46619528 |
| RPS4Y2:CCDS44028.1   | -2.541066772 | 0.858756971  | 53.36220996 |
| GRAMD2:CCDS32283.1   | -2.356084844 | 0.521486278  | 53.3215466  |
| MYO1H:CCDS53826.1    | -2.376761598 | 1.693038036  | 53.27329801 |
| TTLL6:CCDS11537.2    | -2.35769614  | 0.871514869  | 53.27260937 |
| CR2:CCDS31007.1      | -2.2568151   | 1.675557985  | 53.27194319 |
| CAGE1:CCDS54965.1    | -2.385333401 | 1.37021435   | 53.2561937  |
| KRT1:CCDS8836.1      | -2.256557593 | 1.352526385  | 53.25326518 |
| FCRL5:CCDS1165.1     | -2.289143176 | 1.61508788   | 53.24838295 |
| ZFY:CCDS14774.1      | -1.769267091 | 1.739835157  | 53.23812346 |
| PTPRB:CCDS55845.1    | -1.473989194 | 2.870303546  | 53.22348276 |
| TGM5:CCDS32211.1     | -2.352019051 | 1.008659968  | 53.17450883 |
| TGM5:CCDS32212.1     | -2.336736019 | 1.153932158  | 53.14653991 |
| OR6A2:CCDS7772.1     | -2.805724957 | 1.558926955  | 53.1194671  |
| RORC:CCDS30856.1     | -1.89811872  | 0.553470372  | 53.09042583 |
| CARD6:CCDS3935.1     | -2.321398445 | 1.428686527  | 53.084592   |
| MYO7B:CCDS46405.1    | -1.331631777 | 2.839800558  | 53.00908701 |
| AMTN:CCDS3542.1      | -2.495870178 | -0.011230499 | 52.9198139  |
| LRRC31:CCDS43167.1   | -2.350086733 | 1.035109433  | 52.89985907 |
| SCNN1G:CCDS10608.1   | -2.705697492 | 1.11927262   | 52.89137508 |
| EIF1AY:CCDS14795.1   | -3.609821962 | 1.406499604  | 52.88201637 |
| EMR1:CCDS12175.1     | -2.280446902 | 2.070517238  | 52.83583562 |
| PPEF2:CCDS34013.1    | -2.257886754 | 1.515091066  | 52.78495456 |
| SIGLEC9:CCDS56100.1  | -2.418825162 | 0.543547951  | 52.77001563 |
| SLAMF7:CCDS1209.1    | -2.366354603 | 1.099410818  | 52.40634296 |
| SIGLEC6:CCDS54307.1  | -2.406092047 | 0.534931463  | 52.31644339 |
| KRT34:CCDS11390.1    | -2.893589952 | 0.960668239  | 52.24588559 |
| GOLGA6L1:CCDS53919.1 | -2.238872202 | 1.468841941  | 52.19509784 |
| PTPN7:CCDS1423.2     | -2.030691842 | 1.307724048  | 52.17129405 |
| CLCNKA:CCDS41269.1   | -1.64542498  | 1.497958173  | 52.14836164 |
| TDRD1:CCDS7588.1     | -2.244353059 | 2.093919255  | 52.11597548 |

## TAUvsControls

|                      |              |             |             |
|----------------------|--------------|-------------|-------------|
| C1orf101:CCDS44340.1 | -2.252162596 | 1.758599972 | 52.08817861 |
| MYBPC3:CCDS53621.1   | -1.497021293 | 2.339227043 | 52.04667698 |
| FMO5:CCDS44209.1     | -2.41990883  | 0.579019754 | 52.01730331 |
| ENPP3:CCDS5148.1     | -1.888752535 | 1.70629656  | 51.91045421 |
| MRC1:CCDS7123.1      | -2.253700355 | 2.085810179 | 51.88272967 |
| ZYG11A:CCDS44148.1   | -2.265895614 | 1.213699051 | 51.8641196  |
| GPR110:CCDS34471.1   | -2.338327451 | 1.299763185 | 51.78578012 |
| SLC6A18:CCDS3860.1   | -2.311505021 | 1.578163345 | 51.78327993 |
| IL9R:CCDS14771.4     | -1.54997149  | 2.059863464 | 51.78067125 |
| SELE:CCDS1283.1      | -2.314931219 | 1.208572211 | 51.72445182 |
| CDH16:CCDS56002.1    | -2.279773928 | 1.389618141 | 51.70701599 |
| LCA5L:CCDS13665.1    | -1.808174511 | 2.332875408 | 51.68523202 |
| TTLL6:CCDS45724.1    | -1.925813133 | 1.611783492 | 51.6744762  |
| SLC2A9:CCDS3407.1    | -2.330532438 | 1.113260013 | 51.6038145  |
| BRDT:CCDS735.1       | -2.236621796 | 1.651464798 | 51.58144063 |
| LGALS12:CCDS44633.1  | -2.357728956 | 0.948398814 | 51.55168799 |
| SLC5A8:CCDS9080.1    | -2.259867199 | 0.894675338 | 51.54126771 |
| FCRL6:CCDS30912.1    | -2.263581021 | 1.255970205 | 51.47053985 |
| GDF5:CCDS13254.1     | -1.444136769 | 1.235549232 | 51.45156087 |
| TCHH:CCDS41396.1     | -1.965646122 | 2.485635942 | 51.44672389 |
| LGALS12:CCDS8045.1   | -2.354935409 | 0.943987843 | 51.44117537 |
| RPS4Y1:CCDS14773.1   | -4.452768637 | 6.235580262 | 51.39640326 |
| CD22:CCDS54248.1     | -2.323044636 | 1.75997414  | 51.35598712 |
| CLCNKA:CCDS167.1     | -1.636525289 | 1.505830476 | 51.32783297 |
| NUP210L:CCDS41399.1  | -1.437906253 | 2.549164761 | 51.32009855 |
| CATSPER1:CCDS8127.1  | -2.314962991 | 1.196991726 | 51.27900544 |
| TMPRSS4:CCDS53716.1  | -2.27922882  | 1.387886891 | 51.24069021 |
| CAPN11:CCDS47436.1   | -2.259455836 | 1.394823689 | 51.22575003 |
| DUOX2:CCDS10117.1    | -1.365661879 | 2.254994908 | 51.19731409 |
| DAZ4:CCDS55556.1     | -2.454705261 | 1.423866684 | 51.17971543 |
| KRT33A:CCDS11388.1   | -2.86893286  | 0.681299939 | 51.14648965 |
| TLR3:CCDS3846.1      | -2.260039728 | 1.295378454 | 51.11455421 |
| ADAD2:CCDS10944.1    | -2.313249112 | 1.25364006  | 51.11051534 |
| SIGLEC7:CCDS42601.1  | -2.421604322 | 0.803478308 | 51.10436057 |
| TMPRSS4:CCDS31684.1  | -2.275780924 | 1.395048405 | 51.09505437 |
| RXFP2:CCDS9342.1     | -2.625684425 | 1.630528247 | 51.08825162 |
| AGBL2:CCDS7944.1     | -1.824730776 | 1.767392938 | 50.99077458 |
| IKZF3:CCDS11346.1    | -2.338511995 | 1.269348986 | 50.79318277 |
| PTPRB:CCDS55846.1    | -1.445607599 | 2.860753689 | 50.78818093 |
| SLC26A8:CCDS4814.1   | -2.349009402 | 1.586547259 | 50.75762489 |
| CD22:CCDS12457.1     | -2.297050339 | 1.888652486 | 50.71344631 |
| IKZF3:CCDS11349.1    | -2.333092914 | 1.128150671 | 50.67811872 |
| PRAMEF4:CCDS30592.1  | -2.383033457 | 0.139102928 | 50.673138   |
| PDE6A:CCDS4299.1     | -1.800441414 | 1.615754851 | 50.63067488 |
| PTPN7:CCDS1422.1     | -2.048836348 | 1.118676073 | 50.60842054 |
| IL1B:CCDS2102.1      | -2.391669465 | 0.543549376 | 50.50102612 |
| LILRB2:CCDS12886.1   | -2.218631782 | 1.252422499 | 50.49775219 |
| BRDT:CCDS55615.1     | -2.210697373 | 1.58566927  | 50.2830187  |
| SBSN:CCDS54253.1     | -2.560542    | 0.620839561 | 50.23547646 |
| SIGLEC12:CCDS12833.1 | -2.249530136 | 0.822806789 | 50.19248322 |
| LILRB2:CCDS42612.1   | -2.213675579 | 1.247318053 | 50.10830949 |

## TAUvsControls

|                      |              |              |             |
|----------------------|--------------|--------------|-------------|
| PDE6C:CCDS7429.1     | -2.375254593 | 1.481831439  | 50.05350151 |
| SPAG17:CCDS899.1     | -1.353239551 | 2.867205176  | 50.00041895 |
| DAZ2:CCDS48210.1     | -2.516161566 | 0.93817825   | 49.94591293 |
| LGALS12:CCDS53648.1  | -2.334879997 | 0.803395449  | 49.84971879 |
| ANGPTL4:CCDS42493.1  | -2.275766831 | 1.784098735  | 49.83453675 |
| KCNQ5:CCDS55037.1    | -2.35986269  | 2.067572103  | 49.82489069 |
| SLC13A2:CCDS54098.1  | -1.846901967 | 1.47341694   | 49.79494262 |
| SIGLEC6:CCDS54308.1  | -2.374603738 | 0.45920513   | 49.76162032 |
| FCRL4:CCDS1166.1     | -2.292156562 | 0.900875682  | 49.72451307 |
| SERPINE1:CCDS5711.1  | -2.487309433 | 6.170653304  | 49.64618833 |
| ARHGEF38:CCDS56338.1 | -2.293807199 | 1.377768625  | 49.61973338 |
| B4GALNT2:CCDS11544.1 | -2.245026561 | 0.883176024  | 49.59310366 |
| C8B:CCDS30730.1      | -2.333587178 | 0.896678714  | 49.57951682 |
| C1orf101:CCDS1625.1  | -2.224104907 | 1.60415454   | 49.56291491 |
| ALS2CR11:CCDS54428.1 | -2.28349143  | 0.64658379   | 49.48961527 |
| SLC39A12:CCDS44362.1 | -1.832301493 | 1.691155965  | 49.48301566 |
| TNFSF11:CCDS9384.1   | -2.361569287 | 0.280656486  | 49.47882121 |
| SLC17A3:CCDS47385.1  | -2.303573715 | 0.514433096  | 49.47363688 |
| KL:CCDS9347.1        | -2.281934521 | 1.275199082  | 49.41577867 |
| ITIH6:CCDS14361.1    | -1.587051574 | 1.737821609  | 49.38460649 |
| DAZ2:CCDS35485.1     | -2.550519517 | 0.993642051  | 49.2302303  |
| TMPRSS4:CCDS44743.1  | -2.242044755 | 1.377694142  | 49.20189561 |
| MAGEC1:CCDS35417.1   | -1.701409702 | 1.451933909  | 49.13994694 |
| KLK5:CCDS12810.1     | -1.846814321 | 0.580404078  | 49.11624323 |
| ADRA1D:CCDS13079.1   | -1.749661663 | 0.887088557  | 49.09653077 |
| SLC9A4:CCDS33264.1   | -2.26523365  | 1.051996858  | 49.06176554 |
| TUBAL3:CCDS53491.1   | -2.306163077 | 0.891130021  | 49.0257538  |
| TCHHL1:CCDS30857.1   | -2.243340092 | 1.083883356  | 49.02461577 |
| KRT2:CCDS8835.1      | -2.278241612 | 1.052131348  | 48.95085042 |
| CD163L1:CCDS8577.1   | -2.310566155 | 2.375477977  | 48.91006972 |
| B4GALNT2:CCDS54139.1 | -2.252092822 | 0.776087231  | 48.89332005 |
| TUBAL3:CCDS7066.2    | -2.294393551 | 0.947504298  | 48.8924446  |
| LILRA1:CCDS12901.1   | -2.279005942 | 1.023234284  | 48.85740239 |
| ASMT:CCDS55364.1     | -2.398267283 | 1.251800731  | 48.81730051 |
| RNF212:CCDS54704.1   | -2.535182567 | 0.101904023  | 48.80734641 |
| SLFN14:CCDS45650.1   | -2.228007883 | 0.857402561  | 48.75667789 |
| DAZ1:CCDS48209.1     | -2.474928217 | 1.85218001   | 48.72568083 |
| ANKRD1:CCDS7412.1    | -1.955252568 | 1.438495785  | 48.71650428 |
| TMPRSS4:CCDS53717.1  | -2.232766454 | 1.262807089  | 48.71258967 |
| SLC13A2:CCDS11231.1  | -1.818289802 | 1.413585498  | 48.68386495 |
| SLC2A9:CCDS3406.1    | -2.295514774 | 1.058120879  | 48.67092836 |
| AADA4L4:CCDS30590.1  | -2.439873443 | 0.359495674  | 48.60936964 |
| NLRP13:CCDS33119.1   | -2.274874989 | 2.65280567   | 48.55299716 |
| EDAR:CCDS2081.1      | -1.865935966 | 0.643201465  | 48.50949703 |
| TDO2:CCDS34086.1     | -2.400923376 | 0.664524908  | 48.47063579 |
| VSIG4:CCDS14383.1    | -2.329035868 | 0.462885535  | 48.39180351 |
| KLB:CCDS3451.1       | -2.184750567 | 1.211100798  | 48.35375037 |
| PGLYRP4:CCDS30871.1  | -2.480438981 | -0.066094576 | 48.33722456 |
| ADAM2:CCDS34884.1    | -2.176922112 | 1.29904858   | 48.27604158 |
| ST14:CCDS8487.1      | -1.5849226   | 1.533006992  | 48.2410149  |
| HTR3D:CCDS54685.1    | -2.318655658 | 0.868165635  | 48.23617896 |

## TAUvsControls

|                      |              |              |             |
|----------------------|--------------|--------------|-------------|
| KRT84:CCDS8825.1     | -2.230413517 | 1.148283469  | 48.23211438 |
| GBP5:CCDS722.1       | -2.205542489 | 1.056645122  | 48.22513508 |
| CR2:CCDS1478.1       | -2.179824665 | 1.559980467  | 48.18745124 |
| TBX4:CCDS11629.1     | -2.308630868 | 1.01063211   | 48.18655608 |
| NUP210L:CCDS53370.1  | -1.417528356 | 2.421462502  | 48.15382129 |
| ADAMTS20:CCDS31778.2 | -1.637948996 | 2.479227524  | 48.00930351 |
| ABCB5:CCDS5371.1     | -2.198669121 | 1.220288809  | 47.9111513  |
| C4BPA:CCDS1477.1     | -2.36100487  | 0.782047507  | 47.86936152 |
| ALOX5:CCDS7212.1     | -2.374169215 | 1.292167698  | 47.84731891 |
| KLK11:CCDS12818.1    | -2.351319552 | 0.199078658  | 47.83749205 |
| KRT35:CCDS11394.2    | -2.335830216 | 0.636777712  | 47.76678348 |
| SCN7A:CCDS46442.1    | -1.827412893 | 2.259399072  | 47.75443867 |
| ANKRD30B:CCDS54182.1 | -1.750093434 | 2.232621159  | 47.72129297 |
| LGALS12:CCDS44634.1  | -2.299717985 | 0.809888814  | 47.65404378 |
| RBPJL:CCDS13349.1    | -2.256715862 | 1.020711068  | 47.56635006 |
| NPHS2:CCDS1331.1     | -2.268726672 | 0.472083665  | 47.50608082 |
| CYP4F11:CCDS12337.1  | -2.313200544 | 0.711192111  | 47.43981592 |
| AXDND1:CCDS30948.1   | -1.55117185  | 1.990140028  | 47.422687   |
| SCEL:CCDS9459.1      | -2.321447089 | 2.168964491  | 47.41937191 |
| FGD2:CCDS4829.1      | -1.599622639 | 1.12186489   | 47.40949733 |
| KCNQ5:CCDS4976.1     | -2.374709356 | 2.166040885  | 47.38514437 |
| GYS2:CCDS8690.1      | -2.181733895 | 1.240269104  | 47.37838129 |
| CCDC67:CCDS44707.1   | -2.302396019 | 1.013632586  | 47.27197001 |
| SLC5A1:CCDS13902.1   | -2.525025066 | 1.067504855  | 47.24457704 |
| SKAP1:CCDS32674.1    | -2.330854412 | 0.733694957  | 47.19944744 |
| GP2:CCDS10582.2      | -2.24064085  | 1.022336411  | 47.17770224 |
| FMO2:CCDS1293.1      | -2.282590445 | 0.792339885  | 47.16776249 |
| HRASLS5:CCDS53646.1  | -2.475778272 | 0.43920438   | 47.14410519 |
| OR56A1:CCDS31405.1   | -2.414234594 | -0.011229934 | 47.07463772 |
| IKZF3:CCDS11348.1    | -2.268439399 | 1.100354571  | 47.05154005 |
| PAX4:CCDS5797.1      | -2.292740071 | 0.393645912  | 47.05036433 |
| FSD2:CCDS45332.1     | -1.810073582 | 1.254303394  | 46.93129292 |
| CSHL1:CCDS11652.1    | -2.477018122 | 0.214126994  | 46.87140682 |
| ADAM18:CCDS6113.1    | -2.225075956 | 1.426298573  | 46.83739926 |
| HRASLS5:CCDS8044.1   | -2.473702399 | 0.452694995  | 46.82637875 |
| MSR1:CCDS5995.1      | -2.367938322 | 0.627452748  | 46.8144698  |
| SRY:CCDS14772.1      | -2.33492908  | 0.199906829  | 46.81288384 |
| GPR115:CCDS4922.2    | -2.282566447 | 0.895218905  | 46.81138376 |
| TBXAS1:CCDS55174.1   | -1.700604612 | 1.143057323  | 46.73116678 |
| ASMT:CCDS14117.1     | -2.484301353 | 1.664737053  | 46.72522135 |
| KLK11:CCDS12819.1    | -2.402636168 | -0.158245517 | 46.70425976 |
| CD22:CCDS54247.1     | -2.245937182 | 1.73429591   | 46.69993946 |
| GGT6:CCDS45582.1     | -2.269518537 | 0.482248545  | 46.65887047 |
| GIMAP8:CCDS34777.1   | -2.288769054 | 0.609329676  | 46.65479683 |
| IL20RA:CCDS5181.1    | -2.305633025 | 0.905064923  | 46.65420684 |
| HTR4:CCDS34272.1     | -2.33149792  | 0.745956935  | 46.65139599 |
| ANO9:CCDS31326.1     | -1.7290156   | 1.701374663  | 46.64032679 |
| LILRB4:CCDS42618.1   | -1.811812731 | 1.157397261  | 46.63605168 |
| SAMD9L:CCDS34681.1   | -1.738727081 | 1.953393976  | 46.56671204 |
| IKZF3:CCDS11351.1    | -2.25909128  | 0.93984963   | 46.42886392 |
| SIGLEC6:CCDS12836.3  | -2.320369397 | 0.304740268  | 46.41698905 |



TAUvsControls

|                       |              |              |             |
|-----------------------|--------------|--------------|-------------|
| GP2:CCDS42128.1       | -2.238051155 | 1.181339861  | 46.40871871 |
| ZNF683:CCDS279.2      | -2.248732526 | 0.727863209  | 46.38546906 |
| KCNQ5:CCDS55036.1     | -2.368162244 | 2.168467373  | 46.2786035  |
| ARSH:CCDS35198.1      | -2.207144592 | 0.832723578  | 46.27151765 |
| GAB3:CCDS14760.1      | -2.242349111 | 1.208875741  | 46.24790645 |
| FPR1:CCDS12839.1      | -2.339202901 | -0.178186396 | 46.24377616 |
| LILRB4:CCDS12902.1    | -1.808578106 | 1.159557765  | 46.23323056 |
| PIWIL1:CCDS9268.1     | -2.248714872 | 1.433890198  | 46.19740123 |
| CCDC63:CCDS9151.1     | -2.275292521 | 1.275080091  | 46.17074113 |
| KIAA1210:CCDS48156.1  | -2.486846212 | 2.201123034  | 46.1659102  |
| CYBB:CCDS14242.1      | -2.197990965 | 0.923503636  | 46.15742209 |
| GAB3:CCDS48198.1      | -2.238612475 | 1.214611486  | 46.11033814 |
| LTF:CCDS33747.1       | -2.210962984 | 1.49094526   | 46.10597033 |
| XIRP2:CCDS56145.1     | -2.266031526 | 1.133760512  | 46.07745752 |
| SLC39A12:CCDS7124.1   | -1.798042691 | 1.57942621   | 46.07530431 |
| RARRES1:CCDS54665.1   | -1.845588958 | 0.40376235   | 46.06190963 |
| RXFP1:CCDS43276.1     | -2.192080252 | 1.429403324  | 46.01969625 |
| INSC:CCDS41621.1      | -1.719252299 | 1.318827725  | 46.01414317 |
| TNFRSF13C:CCDS14024.1 | -2.175882116 | 0.573016264  | 45.9980752  |
| HSD11B1:CCDS1489.1    | -2.294936659 | 0.048480922  | 45.98421728 |
| CD8B:CCDS1997.1       | -2.416389737 | 0.03724273   | 45.89173608 |
| BRDT:CCDS55616.1      | -2.161191879 | 1.525672889  | 45.8708853  |
| EPB42:CCDS10093.1     | -2.19138526  | 1.347955372  | 45.85517231 |
| GSTT2B:CCDS33617.1    | -2.995570126 | 0.653921969  | 45.85211809 |
| SAGE1:CCDS14652.1     | -2.11862534  | 1.60990484   | 45.83482438 |
| LGALS12:CCDS44635.1   | -2.274173096 | 0.65479794   | 45.83051166 |
| SLC22A12:CCDS8075.1   | -1.917045523 | 0.96027066   | 45.79733393 |
| FAM205A:CCDS55305.1   | -1.577211516 | 1.495373399  | 45.7748835  |
| GP2:CCDS45432.1       | -2.295271985 | 0.568091253  | 45.74191199 |
| ZFP57:CCDS43436.2     | -2.294837458 | 0.531234641  | 45.73708032 |
| KRT77:CCDS8837.1      | -2.249115187 | 1.218040716  | 45.67226724 |
| GFRA4:CCDS13055.1     | -2.490650323 | -0.255451224 | 45.61885161 |
| PHOSPHO1:CCDS45726.1  | -2.391770804 | -0.102543583 | 45.5050544  |
| ACSM4:CCDS44825.1     | -2.771262027 | 3.178204434  | 45.49285526 |
| ANGPTL4:CCDS12200.1   | -2.215721337 | 1.900585268  | 45.47272751 |
| PRAMEF15:CCDS44059.1  | -2.362872702 | 0.229912901  | 45.45617041 |
| TRPV3:CCDS11029.1     | -1.955366531 | 2.036449196  | 45.41168278 |
| GPR128:CCDS2938.1     | -2.161611238 | 1.190953078  | 45.3867711  |
| HOPX:CCDS54767.1      | -3.090809867 | 2.152441073  | 45.38427989 |
| KCNQ5:CCDS55035.1     | -2.284698133 | 1.905073909  | 45.30340898 |
| UGT2B28:CCDS3528.1    | -2.291365208 | 0.663662388  | 45.30141909 |
| FMO5:CCDS926.1        | -2.24523272  | 0.671471506  | 45.29147858 |
| HLA-DRA:CCDS4750.1    | -2.453549795 | 0.503541384  | 45.29004893 |
| DKK4:CCDS6130.1       | -2.353371983 | -0.210556228 | 45.28464864 |
| KRT6A:CCDS41786.1     | -2.255775016 | 1.009177589  | 45.27710567 |
| SYT8:CCDS7726.2       | -2.340067715 | 0.661097399  | 45.23595673 |
| FBXO40:CCDS33835.1    | -2.258965676 | 0.819260548  | 45.21536355 |
| ACTL7B:CCDS6771.1     | -1.982463175 | -0.067312741 | 45.20135284 |
| KLK11:CCDS54297.1     | -2.350071124 | 0.008139925  | 45.19283238 |
| LPO:CCDS32689.1       | -2.311367449 | 1.358193159  | 45.18719332 |
| SLC47A2:CCDS11211.1   | -2.064846755 | 2.192551955  | 45.16442018 |

## TAUvsControls

|                      |              |              |             |
|----------------------|--------------|--------------|-------------|
| SCEL:CCDS9458.1      | -2.283718238 | 2.1270723    | 45.13947492 |
| KRT73:CCDS8834.1     | -2.256849185 | 0.94822666   | 45.12755139 |
| ADAD2:CCDS45536.1    | -2.204081325 | 1.041804364  | 45.11507705 |
| TTC24:CCDS53379.1    | -2.32122872  | 0.816549063  | 45.10550148 |
| LPO:CCDS54149.1      | -2.282544968 | 0.993641666  | 45.08958365 |
| METTL24:CCDS43489.1  | -2.372311961 | 0.374376753  | 44.94636946 |
| CRYBB1:CCDS13840.1   | -3.976959282 | 7.206048317  | 44.91873997 |
| AKR1B15:CCDS47715.2  | -2.275940149 | 0.313936447  | 44.86983358 |
| SHCBP1L:CCDS30955.1  | -2.360161929 | 1.019131149  | 44.85314378 |
| POTEC:CCDS45835.1    | -2.23256042  | 0.703581635  | 44.85282257 |
| TBXAS1:CCDS5855.1    | -1.700072212 | 1.025886866  | 44.83537723 |
| BPIFB2:CCDS13210.1   | -2.239746647 | 0.655113901  | 44.80561697 |
| FAM124B:CCDS46527.1  | -2.455675867 | 0.419842765  | 44.78307755 |
| FOXI2:CCDS7655.2     | -2.480056915 | -0.378192665 | 44.73391585 |
| GUCY2F:CCDS14545.1   | -2.211682648 | 1.806184285  | 44.72588353 |
| CLEC4E:CCDS8594.1    | -2.390624836 | 0.016581362  | 44.67613443 |
| LRRC15:CCDS46984.1   | -2.250076818 | 0.445575853  | 44.66277452 |
| SIGLEC8:CCDS33086.1  | -2.166418387 | 0.666552959  | 44.65894998 |
| SBSN:CCDS12464.1     | -2.526286562 | 0.052483086  | 44.65588189 |
| DDX43:CCDS4977.1     | -2.245805444 | 1.140965394  | 44.60965128 |
| FAM154A:CCDS6487.1   | -2.260810957 | 0.261095214  | 44.59411842 |
| AQP12B:CCDS46560.1   | -2.420210275 | -0.250952304 | 44.58591061 |
| EPB42:CCDS45249.1    | -2.164801684 | 1.311147379  | 44.52115807 |
| UMOD:CCDS10583.1     | -2.193992909 | 1.163650181  | 44.48508014 |
| ENAM:CCDS3544.2      | -2.269853698 | 1.497807305  | 44.47466583 |
| IKZF3:CCDS11347.1    | -2.221128048 | 1.104453266  | 44.46151973 |
| GJD4:CCDS7191.1      | -2.491807    | -0.0635787   | 44.44060495 |
| ELF5:CCDS7892.1      | -2.314320143 | 0.357657649  | 44.40560886 |
| ECT2L:CCDS43508.1    | -1.757628455 | 1.640827252  | 44.36025171 |
| CAGE1:CCDS47367.1    | -2.230289158 | 0.968902423  | 44.3594351  |
| SLC35D3:CCDS34544.1  | -2.298964886 | 0.368648439  | 44.3481712  |
| PRDM14:CCDS6206.1    | -2.171078735 | 0.784558857  | 44.32648383 |
| ASB11:CCDS14164.1    | -2.177970475 | 0.626556831  | 44.32218337 |
| PHOSPHO1:CCDS11547.1 | -2.378545581 | -0.220768562 | 44.28949969 |
| GP2:CCDS45433.1      | -2.26889363  | 0.7829422    | 44.21453726 |
| IPCEF1:CCDS47509.1   | -2.272169737 | 0.826205178  | 44.12259458 |
| ELF5:CCDS7893.1      | -2.313686089 | 0.261443747  | 44.10649772 |
| FAM47B:CCDS14236.1   | -2.183687923 | 0.576212846  | 44.10055967 |
| HRASLS5:CCDS53647.1  | -2.443675622 | 0.268889588  | 44.09685021 |
| PTCHD3:CCDS31173.1   | -2.24170137  | 0.796323212  | 44.08003127 |
| KIF2B:CCDS32685.1    | -2.210078317 | 0.492086913  | 44.01940451 |
| ASB11:CCDS56596.1    | -2.175561443 | 0.586167794  | 43.99091907 |
| CT47A11:CCDS35381.1  | -2.264987837 | -0.020732102 | 43.97393656 |
| CWH43:CCDS3486.1     | -2.191463447 | 1.206018408  | 43.97327311 |
| VSIG4:CCDS55435.1    | -2.265069531 | 0.267299727  | 43.97255181 |
| CLEC17A:CCDS56087.1  | -2.179679222 | 0.777051157  | 43.97120289 |
| PRKAG3:CCDS2424.1    | -2.178395705 | 0.940090611  | 43.96911199 |
| FCRL2:CCDS1168.1     | -2.227606738 | 0.82266561   | 43.95746616 |
| GGT6:CCDS11047.1     | -2.244978359 | 0.326592227  | 43.94397243 |
| SERPINB7:CCDS11988.1 | -2.146655015 | 1.041750555  | 43.92937071 |
| RYR2:CCDS55691.1     | -1.649458005 | 4.358897288  | 43.91919582 |

## TAUvsControls

|                      |              |              |             |
|----------------------|--------------|--------------|-------------|
| IL1RL2:CCDS2056.1    | -2.221496421 | 0.707313589  | 43.90264741 |
| INSC:CCDS41622.1     | -1.702304568 | 1.226814871  | 43.89618185 |
| KRT14:CCDS11400.1    | -2.215299231 | 0.929247372  | 43.86456434 |
| ITK:CCDS4336.1       | -2.256395225 | 1.31698683   | 43.86106015 |
| FAM47A:CCDS43926.1   | -2.250619274 | 0.928460306  | 43.85698149 |
| CORIN:CCDS3477.1     | -1.510151595 | 2.015338917  | 43.84561596 |
| KCNQ5:CCDS55034.1    | -2.382406859 | 2.260388049  | 43.83846948 |
| SLC12A3:CCDS10770.1  | -1.632533561 | 1.923848547  | 43.80698454 |
| FAM83C:CCDS13251.1   | -2.178386478 | 0.789933389  | 43.79725186 |
| SERPINA12:CCDS9926.1 | -2.329062386 | 0.025622507  | 43.7888145  |
| DOK3:CCDS47350.1     | -1.791978031 | 0.581559335  | 43.78407005 |
| SLC12A3:CCDS45491.1  | -1.631233395 | 1.923391892  | 43.72039381 |
| KLK12:CCDS12821.1    | -2.288169481 | 0.082194399  | 43.69846992 |
| COL4A4:CCDS42828.1   | -2.050991945 | 2.450802576  | 43.67932729 |
| IPCEF1:CCDS5245.1    | -2.261665136 | 0.816204795  | 43.66218115 |
| TLR8:CCDS14152.1     | -2.160660106 | 1.027598386  | 43.65715499 |
| DOK3:CCDS47349.1     | -2.207185159 | 0.162009787  | 43.65308772 |
| DPEP3:CCDS10856.1    | -2.222969172 | 0.703482663  | 43.6112064  |
| MRGPRF:CCDS8188.1    | -2.283559065 | 0.530912778  | 43.60641895 |
| CPA1:CCDS5820.1      | -1.680373896 | 1.056332665  | 43.588275   |
| KLK12:CCDS12820.1    | -2.294524354 | 0.166857414  | 43.57977608 |
| CT47A5:CCDS35387.1   | -2.274507343 | 0.09105801   | 43.52517714 |
| FCRL1:CCDS1170.1     | -2.254987403 | 0.705314173  | 43.49482962 |
| PRSS21:CCDS45389.1   | -2.322749778 | 0.4089994    | 43.48714316 |
| MPP4:CCDS46491.1     | -2.295506145 | 1.767755463  | 43.4810479  |
| LTF:CCDS56251.1      | -2.211889411 | 1.356693984  | 43.41135997 |
| KYNU:CCDS2183.1      | -2.206120162 | 1.044002011  | 43.40355367 |
| HPSE2:CCDS7477.1     | -2.324466904 | 1.065152157  | 43.38565668 |
| SCEL:CCDS53877.1     | -2.246559581 | 2.037459663  | 43.32576149 |
| BPIFB6:CCDS13211.1   | -2.192068916 | 0.69162496   | 43.30217315 |
| SFTPFB:CCDS1983.2    | -2.217974888 | 0.331658044  | 43.28055187 |
| TLR7:CCDS14151.1     | -2.242226293 | 1.475023623  | 43.26259807 |
| TDRD10:CCDS30878.2   | -2.29238746  | 0.360201563  | 43.25639552 |
| SLC9A2:CCDS2062.1    | -2.283302438 | 1.209367956  | 43.25254877 |
| IQCA1:CCDS46549.1    | -1.467498704 | 1.928297439  | 43.2263521  |
| SLC36A3:CCDS4314.1   | -2.241946454 | 0.798074281  | 43.22441969 |
| STK31:CCDS43556.1    | -1.583044714 | 1.890785798  | 43.21917588 |
| OR10A6:CCDS31420.1   | -2.327254101 | -0.047153043 | 43.18681095 |
| SULT1B1:CCDS3530.1   | -2.296303475 | -5.25088E-05 | 43.17624016 |
| TDRD9:CCDS9987.2     | -2.431973136 | 2.201021988  | 43.14494173 |
| CT47A12:CCDS56607.1  | -2.254491906 | 0.097653182  | 43.14122416 |
| ANXA8L2:CCDS7216.1   | -2.293979346 | 2.179305703  | 43.12961407 |
| PRSS21:CCDS10478.1   | -2.303975133 | 0.423481501  | 43.09380813 |
| TDRD10:CCDS41406.1   | -2.263392357 | 0.338521491  | 43.03768853 |
| ZBP1:CCDS13461.1     | -2.237617457 | 0.847531514  | 43.00884241 |
| PRAMEF11:CCDS53268.1 | -2.257630877 | -0.008880394 | 43.00853049 |
| NCF4:CCDS13935.1     | -2.238776801 | 0.695724628  | 43.0052931  |
| DAZ4:CCDS55557.1     | -2.358114209 | 0.90383921   | 42.9854266  |
| DDX4:CCDS3969.1      | -1.770594596 | 1.497266588  | 42.97655735 |
| TBXAS1:CCDS55175.1   | -1.672721015 | 0.859767498  | 42.97057756 |
| GAB4:CCDS42976.1     | -2.274156457 | 0.764811413  | 42.95504522 |

## TAUvsControls

|                      |              |              |             |
|----------------------|--------------|--------------|-------------|
| B4GALNT2:CCDS54140.1 | -2.171348128 | 0.65793127   | 42.91770977 |
| ACTBL2:CCDS34163.1   | -2.294615228 | 0.950871322  | 42.8966117  |
| GH2:CCDS11648.1      | -2.324756213 | -0.046387603 | 42.87384925 |
| ITIH3:CCDS46845.1    | -2.762023719 | 2.512257406  | 42.83608294 |
| SLC22A25:CCDS31592.1 | -2.193585226 | 0.542494711  | 42.78290507 |
| SLCO2B1:CCDS8235.1   | -2.131120778 | 1.474558223  | 42.76118742 |
| CT47A4:CCDS35388.1   | -2.250875745 | 0.046297604  | 42.74919217 |
| RUNX3:CCDS30633.1    | -2.252398488 | 0.431905868  | 42.73645718 |
| TGM7:CCDS32213.1     | -2.207004043 | 1.040402515  | 42.70248732 |
| SLC17A4:CCDS4564.1   | -2.259402744 | 0.828753092  | 42.66923506 |
| PRSS21:CCDS45388.1   | -2.286811204 | 0.369867013  | 42.66269133 |
| AQPEP:CCDS4124.1     | -1.505256598 | 1.351473656  | 42.66030276 |
| NOX5:CCDS32276.2     | -1.428004498 | 1.842040399  | 42.65116586 |
| ASZ1:CCDS5772.1      | -2.220726972 | 0.453374459  | 42.62672679 |
| REG1A:CCDS1964.1     | -2.472863912 | -0.132760099 | 42.62359745 |
| STK31:CCDS5386.1     | -1.615112362 | 1.997692057  | 42.55308487 |
| CASP12:CCDS55785.1   | -2.216580861 | 0.483831694  | 42.54242312 |
| CT47A2:CCDS35390.1   | -2.191493496 | 0.098766574  | 42.41522504 |
| UBQLN3:CCDS7758.1    | -2.225961321 | 0.359321681  | 42.36267415 |
| NMUR2:CCDS4321.1     | -2.213180152 | 0.420029596  | 42.35411639 |
| ZBP1:CCDS54478.1     | -2.263742632 | 0.147621025  | 42.33384657 |
| TNFSF10:CCDS3219.1   | -2.460469134 | 0.298219598  | 42.26581574 |
| CARD11:CCDS5336.2    | -1.297607772 | 2.185029667  | 42.23737923 |
| BEND2:CCDS14184.1    | -2.1592768   | 1.231367764  | 42.20410204 |
| HTR3D:CCDS46966.1    | -2.209323904 | 0.760436929  | 42.20117327 |
| GPRC6A:CCDS5112.1    | -2.123697286 | 1.088640651  | 42.17573055 |
| CD8B:CCDS42708.1     | -2.352522521 | 0.034808336  | 42.17483435 |
| FAM9A:CCDS14131.1    | -1.741942322 | 0.824577182  | 42.16239865 |
| SPATC1:CCDS47937.1   | -2.203734568 | 0.498462883  | 42.14082383 |
| KRTDAP:CCDS12462.1   | -2.329383649 | -0.342408213 | 42.121833   |
| C1orf101:CCDS55693.1 | -2.155534018 | 1.279258844  | 42.11061001 |
| CT47A8:CCDS35384.1   | -2.199552283 | 0.044861596  | 42.04218083 |
| FCGR2A:CCDS44264.1   | -2.272091131 | 0.383817124  | 41.95070786 |
| CLEC4M:CCDS12187.1   | -2.278837296 | 1.149312742  | 41.95020952 |
| DOK3:CCDS4426.1      | -1.692127233 | 1.15093952   | 41.93064379 |
| LRRC15:CCDS3306.1    | -2.220240202 | 0.357794817  | 41.92333003 |
| FCRL1:CCDS53383.1    | -2.233363068 | 0.68899526   | 41.91958844 |
| CLCA4:CCDS41355.1    | -2.092884845 | 1.268202028  | 41.91746391 |
| SLCO2B1:CCDS44683.1  | -2.119007487 | 1.381362221  | 41.91083135 |
| BPIFA3:CCDS13216.2   | -2.405768364 | 0.06063782   | 41.89654653 |
| MOG:CCDS34370.1      | -1.846899848 | 0.83615687   | 41.89325313 |
| CASP5:CCDS44718.1    | -2.199151957 | 0.514525557  | 41.88768192 |
| MAT1A:CCDS7365.1     | -2.228314332 | 0.608047067  | 41.87208798 |
| CD209:CCDS12186.1    | -2.221915171 | 0.896993013  | 41.87205182 |
| MYH13:CCDS45613.1    | -2.760822801 | 2.634441517  | 41.86504036 |
| CD8B:CCDS1995.1      | -2.316401105 | 0.07959483   | 41.84930031 |
| A2ML1:CCDS8596.2     | -1.516180549 | 2.421195019  | 41.80956    |
| SLC4A9:CCDS47278.1   | -1.452117943 | 1.761275702  | 41.80224766 |
| C16orf78:CCDS10738.1 | -2.408844907 | -0.305746823 | 41.76819012 |
| SLC5A9:CCDS30709.2   | -1.845630603 | 1.327768185  | 41.75520764 |
| MEPE:CCDS3625.1      | -2.185230239 | 0.760394546  | 41.74927414 |

## TAUvsControls

|                      |              |              |             |
|----------------------|--------------|--------------|-------------|
| IVL:CCDS1030.1       | -2.217423451 | 0.535647569  | 41.73497782 |
| HMGCS2:CCDS53353.1   | -2.214182    | 1.129227848  | 41.72634015 |
| MLKL:CCDS32487.1     | -2.2334697   | 0.80230622   | 41.71171968 |
| KRT27:CCDS11375.1    | -2.174954724 | 0.526291161  | 41.71118034 |
| NBPF4:CCDS44182.1    | -1.742872503 | 1.026470792  | 41.6897368  |
| IL12B:CCDS4346.1     | -2.338757122 | 0.673208985  | 41.67346451 |
| BTNL8:CCDS43413.1    | -2.164001501 | 0.752038416  | 41.65835354 |
| ADTRP:CCDS4521.1     | -2.319930878 | 0.016926834  | 41.6203979  |
| ASB11:CCDS35209.1    | -2.145756661 | 0.595128219  | 41.60109376 |
| YIPF7:CCDS54766.1    | -1.867368513 | 0.012340113  | 41.55263146 |
| DDX4:CCDS54854.1     | -1.748964534 | 1.385343987  | 41.54759618 |
| SLC11A1:CCDS2415.1   | -1.444462661 | 1.197488895  | 41.54180144 |
| SLC5A9:CCDS44136.1   | -1.823868525 | 1.424686622  | 41.52381157 |
| CT47A10:CCDS35382.1  | -2.203808743 | 0.007370827  | 41.52228408 |
| TRPC6:CCDS8311.1     | -2.241582507 | 1.596429827  | 41.51661663 |
| PRAMEF9:CCDS30598.1  | -2.252831879 | 0.323914493  | 41.49069163 |
| CCL7:CCDS11278.1     | -2.731678451 | -0.569929175 | 41.49000794 |
| RIPK3:CCDS9628.1     | -2.176657161 | 0.628750163  | 41.47274422 |
| C18orf63:CCDS54189.1 | -2.142225694 | 0.923980044  | 41.44866412 |
| HORMAD1:CCDS55633.1  | -2.21690964  | 0.478620106  | 41.39609415 |
| TBC1D8B:CCDS14522.1  | -2.213987146 | 2.009378805  | 41.38772974 |
| TBX5:CCDS9173.1      | -2.220491566 | 0.787566261  | 41.35640454 |
| PGLYRP3:CCDS1035.1   | -2.200704455 | 0.206765759  | 41.33721955 |
| FCGR2A:CCDS30922.1   | -2.260515618 | 0.372794642  | 41.31762025 |
| APOH:CCDS11663.1     | -2.158398429 | 0.339325771  | 41.30433139 |
| NPSR1:CCDS5444.1     | -2.122009099 | 1.199263238  | 41.2436299  |
| TCF21:CCDS5167.1     | -2.484769897 | -0.55550132  | 41.23605814 |
| CYP2A13:CCDS12571.1  | -2.129585614 | 0.546353836  | 41.23421122 |
| CD209:CCDS45950.1    | -2.197476516 | 0.764372613  | 41.22475846 |
| MSR1:CCDS5997.1      | -2.304868098 | 0.379107343  | 41.22038711 |
| ETV7:CCDS4819.1      | -2.248481239 | 0.805244748  | 41.21716761 |
| UMODL1:CCDS56215.1   | -1.410967049 | 2.265441995  | 41.20683809 |
| UMODL1:CCDS56214.1   | -1.407077968 | 2.175141282  | 41.18648399 |
| AKAP4:CCDS14329.1    | -2.316466822 | 1.176044229  | 41.15956013 |
| PKD2L2:CCDS43367.1   | -1.739287834 | 1.181872059  | 41.15926404 |
| GBP7:CCDS720.1       | -2.062124733 | 0.760837376  | 41.14599334 |
| HHIPL2:CCDS1530.2    | -1.635983122 | 1.849258776  | 41.13823453 |
| MACC1:CCDS5369.1     | -2.122930813 | 0.91283459   | 41.11663958 |
| ESR1:CCDS5234.1      | -2.155137378 | 0.996024938  | 41.10682251 |
| VAX1:CCDS44483.1     | -1.729664771 | 1.205707825  | 41.07712944 |
| CD38:CCDS3417.1      | -2.309890798 | 0.511401739  | 41.07252336 |
| F13A1:CCDS4496.1     | -2.344639049 | 1.229889421  | 41.01086502 |
| ABCG2:CCDS3628.1     | -2.130056199 | 1.152940127  | 40.98545072 |
| GH2:CCDS45757.1      | -2.285648445 | -0.082118393 | 40.98492833 |
| GFI1B:CCDS6957.1     | -2.23123058  | 0.071406394  | 40.96644126 |
| KLHL31:CCDS34478.1   | -2.206433146 | 0.661300016  | 40.93420362 |
| GRK7:CCDS3120.1      | -2.191194451 | 0.25417043   | 40.93230905 |
| PLEKHG7:CCDS31873.1  | -2.22329163  | 0.238532294  | 40.89498217 |
| ITIH1:CCDS2864.1     | -1.33859677  | 1.908236208  | 40.87679374 |
| NOX5:CCDS53954.1     | -1.419153943 | 1.803280085  | 40.86636772 |
| DTHD1:CCDS54754.1    | -2.114817611 | 0.977724489  | 40.864531   |

## TAUvsControls

|                       |              |              |             |
|-----------------------|--------------|--------------|-------------|
| PRSS22:CCDS10481.1    | -2.281518534 | 0.411482656  | 40.86337234 |
| ROBO4:CCDS8455.1      | -1.300327722 | 1.835928277  | 40.8622369  |
| SERPINB10:CCDS11990.1 | -2.36930736  | 0.49955911   | 40.83881538 |
| TLR6:CCDS3446.1       | -2.165616964 | 0.811516675  | 40.82625988 |
| DCAF12L1:CCDS14610.1  | -2.214901483 | -0.021890489 | 40.81166405 |
| NOX5:CCDS53953.1      | -1.415056934 | 1.777124858  | 40.79739966 |
| HRG:CCDS3280.1        | -2.152045225 | 0.579705217  | 40.76294001 |
| C9:CCDS3929.1         | -2.094043237 | 0.723116351  | 40.74881452 |
| SLC22A1:CCDS5274.1    | -1.597612639 | 0.927224885  | 40.73253192 |
| C8A:CCDS606.1         | -2.162636856 | 0.887120514  | 40.72173736 |
| OXER1:CCDS1810.1      | -2.168125553 | 0.325758912  | 40.7058004  |
| SIX3:CCDS1821.1       | -2.359478438 | 3.321247982  | 40.68704822 |
| FCGR2B:CCDS30924.1    | -2.180875054 | 0.461842705  | 40.68516469 |
| MOG:CCDS4667.1        | -1.812668225 | 0.810828689  | 40.63246256 |
| AMICA1:CCDS8391.1     | -2.16120062  | 0.579909964  | 40.63087758 |
| KBTD12:CCDS33848.2    | -1.77884144  | 0.931503856  | 40.5965029  |
| ADTRP:CCDS47374.1     | -2.279989082 | 0.114674263  | 40.58390795 |
| MYOCD:CCDS54091.1     | -1.852009317 | 1.771523742  | 40.58225394 |
| CXorf36:CCDS48096.1   | -2.174720307 | 0.523804864  | 40.56971475 |
| HCAR3:CCDS53842.1     | -2.264149458 | -0.051169407 | 40.56451229 |
| NRAP:CCDS7579.1       | -1.514395479 | 2.690816814  | 40.5563373  |
| TMC2:CCDS13029.2      | -1.483401452 | 1.676113155  | 40.53905076 |
| HAL:CCDS9058.1        | -2.019497486 | 1.471748279  | 40.51050783 |
| STRA8:CCDS5839.1      | -2.215770931 | 0.044559222  | 40.50192141 |
| MOG:CCDS34369.1       | -1.793593975 | 0.792690748  | 40.49799221 |
| DDX4:CCDS47208.1      | -1.742894145 | 1.402826833  | 40.49609304 |
| BPIFA1:CCDS13217.1    | -2.351726048 | -0.438599543 | 40.48459275 |
| C1orf94:CCDS44108.1   | -2.146050433 | 0.609255622  | 40.48247073 |
| HORMAD1:CCDS967.1     | -2.178694249 | 0.564012321  | 40.47734794 |
| UGT2B28:CCDS56330.1   | -2.193782878 | 0.138623518  | 40.44889809 |
| CSF2RA:CCDS35191.1    | -1.272135687 | 2.338161252  | 40.41897159 |
| FRMD1:CCDS5306.1      | -2.088683033 | 1.07851584   | 40.39341083 |
| MCOLN2:CCDS30762.1    | -2.057731518 | 0.986931565  | 40.38880912 |
| SEMA3G:CCDS2856.1     | -1.29505141  | 1.311336269  | 40.38845789 |
| AKAP4:CCDS14330.1     | -2.271970022 | 1.144471318  | 40.38845031 |
| OR56A4:CCDS31404.1    | -2.310795738 | 0.172457492  | 40.37172389 |
| SLC2A2:CCDS3215.1     | -2.314808306 | 0.904608507  | 40.29395112 |
| SIGLEC11:CCDS12790.2  | -1.502274858 | 1.492584873  | 40.26219405 |
| CT47A3:CCDS35389.1    | -2.220341059 | 0.061161682  | 40.26077028 |
| IL18RAP:CCDS2061.1    | -2.137336533 | 0.811886007  | 40.25959851 |
| HPSE2:CCDS53567.1     | -2.3018956   | 0.962410426  | 40.25565689 |
| TLX1:CCDS7510.1       | -1.887432989 | 0.774724165  | 40.23435586 |
| ALPP:CCDS2490.1       | -2.256169168 | 1.091490975  | 40.23098187 |
| MSR1:CCDS5996.1       | -2.297681349 | 0.441462437  | 40.22662677 |
| NKX2-4:CCDS42855.1    | -2.370346459 | -0.210477618 | 40.2207424  |
| SERPINA3:CCDS32150.1  | -1.9077848   | 2.33612084   | 40.18830148 |
| SLC22A1:CCDS5275.1    | -1.594003792 | 0.800799036  | 40.18502913 |
| ACTRT2:CCDS45.1       | -2.293097957 | -0.024381256 | 40.17642214 |
| KBTD13:CCDS45281.1    | -2.219866346 | 0.207844345  | 40.17536486 |
| TNFRSF10A:CCDS6039.1  | -1.669133631 | 1.01471371   | 40.15901998 |
| NLRP1:CCDS32537.1     | -1.246196409 | 2.138152487  | 40.15453904 |

## TAUvsControls

|                      |              |              |             |
|----------------------|--------------|--------------|-------------|
| UMODL1:CCDS42935.1   | -1.384326907 | 2.341618864  | 40.14401714 |
| SLC13A1:CCDS5786.1   | -2.215878646 | 0.928047302  | 40.1425685  |
| AFM:CCDS3557.1       | -2.223686738 | 0.816688488  | 40.11372571 |
| CT47A9:CCDS35383.1   | -2.216131301 | -0.003328747 | 40.10720805 |
| KRT7:CCDS8822.1      | -1.893560559 | 1.211889877  | 40.09029227 |
| CSF2RA:CCDS55360.1   | -1.254583149 | 2.351492491  | 40.07194641 |
| VSIG8:CCDS30913.1    | -1.695688347 | 0.715451689  | 40.03947239 |
| C10orf67:CCDS44365.1 | -2.641480625 | 1.730709093  | 40.03227389 |
| ASPG:CCDS45170.2     | -2.493606392 | 1.219616486  | 40.03086858 |
| PARP15:CCDS3016.1    | -2.145893187 | 0.558923563  | 40.01415094 |
| CYP4Z1:CCDS545.1     | -2.137787439 | 0.64530909   | 39.96987684 |
| LILRA2:CCDS46179.1   | -2.100953629 | 1.051025315  | 39.96091904 |
| CHIT1:CCDS1436.1     | -2.385169304 | 1.13492467   | 39.95609094 |
| MAG:CCDS12455.1      | -2.115931488 | 1.092485434  | 39.93845066 |
| CD209:CCDS45951.1    | -2.213652445 | 0.860611722  | 39.9226539  |
| RAC2:CCDS13945.1     | -1.919540731 | 0.736281728  | 39.89990368 |
| UMODL1:CCDS42936.1   | -1.377804834 | 2.256124334  | 39.85886154 |
| LHX2:CCDS6853.1      | -2.463751416 | 5.375060941  | 39.85634092 |
| ACTL9:CCDS12207.1    | -2.20926973  | -0.079055074 | 39.84540343 |
| LRRRC14B:CCDS47184.1 | -2.192672235 | 0.217011981  | 39.83810031 |
| CD209:CCDS45949.1    | -2.177551487 | 0.675281038  | 39.80446493 |
| CASP5:CCDS44720.1    | -2.25399993  | 1.362624767  | 39.79858946 |
| GH2:CCDS11647.1      | -2.281050656 | -0.12146281  | 39.77085753 |
| MS4A14:CCDS31569.1   | -2.119341077 | 0.82648845   | 39.76809624 |
| TPRG1:CCDS3292.1     | -2.122734534 | 0.702361166  | 39.76228122 |
| C10orf129:CCDS7440.2 | -2.156144982 | 0.424703474  | 39.73528278 |
| ETV7:CCDS56425.1     | -2.266278025 | 0.710600889  | 39.73517699 |
| LTB:CCDS4703.1       | -2.316701165 | -0.042616726 | 39.71932661 |
| ENDOU:CCDS53785.1    | -1.691803961 | 0.854176063  | 39.69228647 |
| C10orf90:CCDS31310.1 | -2.106059188 | 1.035340859  | 39.69164479 |
| MEP1A:CCDS4918.1     | -2.160028578 | 1.079384923  | 39.6530202  |
| KRT82:CCDS8826.1     | -2.155890375 | 0.770785954  | 39.65183872 |
| SLC22A8:CCDS8042.1   | -2.268462954 | 0.900486858  | 39.63999162 |
| AMICA1:CCDS41723.1   | -2.142458947 | 0.575481415  | 39.62293607 |
| SELP:CCDS1282.1      | -2.012413974 | 1.675987354  | 39.61439995 |
| VWDE:CCDS47544.1     | -2.229299652 | 2.084807856  | 39.61175544 |
| SPDYC:CCDS31606.1    | -2.379044153 | 0.216328283  | 39.60827492 |
| VAX1:CCDS7597.1      | -1.742865989 | 0.849247185  | 39.59381666 |
| IKZF3:CCDS11350.1    | -2.129213041 | 0.912677583  | 39.59303266 |
| LY75:CCDS2211.1      | -1.489516763 | 2.640995037  | 39.59076021 |
| CPA3:CCDS3138.1      | -2.15803236  | 0.325043865  | 39.57507056 |
| KRT32:CCDS11393.1    | -2.143846672 | 0.472019159  | 39.55596617 |
| GH2:CCDS45758.1      | -2.279196385 | -0.186935302 | 39.54429321 |
| KRT71:CCDS8831.1     | -2.155048385 | 0.702210979  | 39.54358693 |
| MS4A14:CCDS41652.1   | -2.121732696 | 0.75837503   | 39.52475088 |
| CASP5:CCDS8328.2     | -2.251459121 | 1.344351351  | 39.51631927 |
| ABCG8:CCDS1815.1     | -2.239241246 | 1.02793912   | 39.49271895 |
| NRAP:CCDS7578.1      | -1.500162236 | 2.655949675  | 39.48217743 |
| HHLA2:CCDS46883.1    | -2.452221959 | 1.132992666  | 39.47913339 |
| LPA:CCDS43523.1      | -2.647275335 | 2.78924712   | 39.43399939 |
| CYP2C18:CCDS7435.1   | -1.776514192 | 0.598709226  | 39.42746605 |

## TAUvsControls

|                      |              |              |             |
|----------------------|--------------|--------------|-------------|
| REG1B:CCDS1963.1     | -2.277889677 | -0.149012084 | 39.40557805 |
| SLC17A3:CCDS4566.2   | -2.138894984 | 0.333794657  | 39.4038257  |
| HPSE2:CCDS53568.1    | -2.262073544 | 1.012451682  | 39.40151433 |
| ART1:CCDS7744.1      | -2.191355141 | -0.153569321 | 39.38768315 |
| CD5:CCDS8000.1       | -2.090283424 | 0.641396109  | 39.35319513 |
| C1orf173:CCDS30755.1 | -1.602469414 | 2.060413294  | 39.31826694 |
| TBX22:CCDS14445.1    | -2.099064967 | 0.607143774  | 39.25342797 |
| SH2D4A:CCDS6009.1    | -1.850311579 | 1.281500312  | 39.25101006 |
| TBX5:CCDS9174.1      | -2.193995189 | 0.627960531  | 39.23072623 |
| AMELY:CCDS14778.1    | -2.30534245  | -0.534606411 | 39.2148833  |
| VSIG4:CCDS48132.1    | -2.214847413 | 0.117905159  | 39.20711315 |
| SLC52A3:CCDS13007.1  | -2.174732769 | 0.267765283  | 39.15448597 |
| TLR5:CCDS31033.1     | -1.747800757 | 0.823315965  | 39.14916005 |
| MIA2:CCDS9672.1      | -2.168825709 | 0.860324453  | 39.14668107 |
| CYP11B1:CCDS6392.1   | -2.13584476  | 0.75625084   | 39.07929209 |
| MOG:CCDS34366.1      | -1.75777692  | 0.766600519  | 39.05733819 |
| SLAMF1:CCDS1207.1    | -2.131680559 | 0.752866139  | 38.99510751 |
| MAGEB1:CCDS14222.1   | -2.273158588 | 0.058301183  | 38.98712581 |
| VSTM1:CCDS12872.1    | -2.253364578 | 0.359513657  | 38.98027807 |
| PNLIP:CCDS7594.1     | -2.117686291 | 0.537844643  | 38.95911847 |
| SGCZ:CCDS5992.2      | -2.186694109 | 0.278829692  | 38.95008549 |
| KLK8:CCDS42600.1     | -1.941790416 | 0.882379523  | 38.9490761  |
| DSG3:CCDS11898.1     | -2.263603995 | 1.643657009  | 38.90930884 |
| C1orf65:CCDS1537.1   | -2.101893525 | 0.459249262  | 38.90316032 |
| SOX30:CCDS4340.1     | -2.142515109 | 0.362634784  | 38.89440851 |
| OR2T6:CCDS31114.1    | -2.303570898 | -0.328132554 | 38.88372818 |
| PRAMEF5:CCDS30596.1  | -1.668048236 | 0.150122218  | 38.8832872  |
| CCDC105:CCDS12322.1  | -2.224613969 | 0.557031087  | 38.84833514 |
| CASR:CCDS3010.1      | -1.511680968 | 1.53437509   | 38.82999853 |
| PDZD3:CCDS53719.1    | -2.113155697 | 0.830601756  | 38.81108427 |
| C9orf152:CCDS35102.2 | -2.368700638 | -0.612440412 | 38.80360552 |
| DNMT3L:CCDS46650.1   | -2.148532344 | 0.976092888  | 38.80332381 |
| KLF14:CCDS5825.1     | -2.642124772 | 0.181665018  | 38.79172321 |
| SELL:CCDS53427.1     | -2.14964886  | 0.767949735  | 38.7839094  |
| OXGR1:CCDS9482.1     | -2.351403337 | -0.506219968 | 38.75188305 |
| KPRP:CCDS30862.1     | -2.196643522 | 0.174803864  | 38.7440599  |
| HOXC12:CCDS8866.1    | -2.309737842 | -0.585910221 | 38.73611183 |
| CLCA2:CCDS708.1      | -2.095696828 | 1.262830435  | 38.70537846 |
| PTPN22:CCDS863.1     | -2.167381478 | 1.652843845  | 38.68658584 |
| HTR4:CCDS4291.1      | -2.169962269 | 0.581109291  | 38.66311689 |
| DMRTB1:CCDS581.1     | -2.168554263 | 0.134398938  | 38.64924576 |
| TFDP3:CCDS14636.2    | -2.124958731 | 0.347921514  | 38.62041928 |
| TRIM42:CCDS3113.1    | -2.141855707 | 0.943159886  | 38.60361902 |
| MYPN:CCDS7275.1      | -2.598684644 | 2.221144762  | 38.60154069 |
| SIGLEC11:CCDS46150.1 | -1.554159965 | 1.38583753   | 38.58873235 |
| CYP2J2:CCDS613.1     | -2.128578955 | 0.813539277  | 38.5791776  |
| DNMT3L:CCDS13705.1   | -2.131962865 | 1.017824973  | 38.55802421 |
| CHIA:CCDS41368.1     | -2.091445349 | 1.118829906  | 38.54727393 |
| C2orf57:CCDS2487.1   | -1.852430551 | 0.018225985  | 38.52926843 |
| RUNX3:CCDS257.1      | -2.2055028   | 0.361636233  | 38.52785885 |
| WT1:CCDS44561.1      | -1.6125427   | 1.576045002  | 38.49493825 |



## TAUvsControls

|                     |              |              |             |
|---------------------|--------------|--------------|-------------|
| BPIFB3:CCDS13212.1  | -2.121168267 | 0.698496496  | 38.48524355 |
| KRT37:CCDS32653.1   | -2.134789566 | 0.637667469  | 38.48278644 |
| RPTN:CCDS41397.1    | -1.765227999 | 1.006509996  | 38.43871775 |
| KRT81:CCDS31805.1   | -1.880522664 | 1.65958795   | 38.43501921 |
| PGLYRP2:CCDS12330.2 | -2.105824054 | 0.299541737  | 38.42961075 |
| CASR:CCDS54632.1    | -1.509701435 | 1.561777449  | 38.41639105 |
| FRMD1:CCDS47518.1   | -2.05723326  | 0.998171896  | 38.3872512  |
| CYP4A11:CCDS543.1   | -2.140577274 | 1.252676346  | 38.37224036 |
| OR5AK2:CCDS31538.1  | -2.906843432 | 0.22737509   | 38.36701185 |
| LINGO4:CCDS30855.1  | -2.106178721 | 0.320067004  | 38.36097597 |
| ABCA12:CCDS33372.1  | -1.216297587 | 3.091614928  | 38.35254242 |
| ZP2:CCDS10596.1     | -2.1973941   | 1.730113178  | 38.34230108 |
| KRT20:CCDS11379.1   | -2.141139884 | 0.402507781  | 38.32492151 |
| SEMG1:CCDS13345.1   | -2.212658301 | 0.328274572  | 38.30481163 |
| POTED:CCDS13562.1   | -2.12989528  | 0.682567301  | 38.3035973  |
| MOGAT3:CCDS5714.1   | -2.144593584 | 0.17166337   | 38.2910338  |
| GBP4:CCDS721.1      | -2.061380149 | 0.752311143  | 38.28142064 |
| ANO3:CCDS31447.1    | -1.464586962 | 1.698618137  | 38.26716968 |
| HMGCS2:CCDS905.1    | -1.747712287 | 1.26076614   | 38.24407001 |
| OR4N5:CCDS32031.1   | -2.227357517 | -0.37014749  | 38.2290421  |
| NPSR1:CCDS5443.1    | -2.067555513 | 1.144719763  | 38.20918007 |
| FSCB:CCDS9679.1     | -2.12158074  | 0.551935145  | 38.20127023 |
| HNF4A:CCDS13330.1   | -2.130484509 | 0.976167004  | 38.19608717 |
| RBM44:CCDS46554.1   | -1.641854241 | 1.374706812  | 38.15445119 |
| C14orf39:CCDS9746.1 | -2.093335845 | 0.944432154  | 38.12426424 |
| TLR2:CCDS3784.1     | -2.050578764 | 0.862439728  | 38.10583432 |
| GDPD4:CCDS8249.1    | -2.129261982 | 0.968533576  | 38.09645733 |
| NPFFR2:CCDS3551.1   | -2.181714975 | 0.602885279  | 38.09112775 |
| VRTN:CCDS9830.1     | -2.122216975 | 0.745500561  | 38.04909974 |
| CCT8L2:CCDS13738.1  | -2.144326059 | 0.313410583  | 38.03770413 |
| CYP11B2:CCDS6393.1  | -2.070290594 | 0.59462525   | 38.02019125 |
| HFE2:CCDS910.1      | -2.43704157  | 0.76629725   | 38.0137729  |
| IRAK3:CCDS8975.1    | -2.147138089 | 0.949554079  | 37.99635755 |
| CCL2:CCDS11277.1    | -1.792076335 | 3.275386209  | 37.99256737 |
| GPR149:CCDS43162.1  | -2.236828991 | 0.764906795  | 37.98236258 |
| ADH7:CCDS54781.1    | -2.19098895  | 0.344045798  | 37.97783024 |
| CLEC17A:CCDS46002.2 | -2.084456261 | 0.600728799  | 37.96216932 |
| KRT13:CCDS11396.1   | -2.077916741 | 0.959238951  | 37.96105754 |
| MOG:CCDS47394.1     | -1.753888511 | 0.685550586  | 37.94904817 |
| PDZD3:CCDS8417.1    | -2.10783096  | 0.780547247  | 37.93531799 |
| NLRP10:CCDS7784.1   | -2.079732589 | 0.470258713  | 37.93223022 |
| FCGR2B:CCDS30925.1  | -2.152957546 | 0.363833034  | 37.93132304 |
| DSC1:CCDS11895.1    | -1.361646603 | 1.470780785  | 37.9268257  |
| DNASE1L3:CCDS2886.1 | -2.165927746 | 0.223963787  | 37.89725455 |
| MAGEC3:CCDS14676.1  | -2.069724991 | 0.927724166  | 37.845053   |
| KLK13:CCDS12822.1   | -2.205496273 | -0.097211799 | 37.83243845 |
| KRT78:CCDS8840.1    | -2.149402521 | 0.794998303  | 37.82657459 |
| PRLHR:CCDS7606.1    | -2.203636097 | 0.135866753  | 37.82657349 |
| HCAR2:CCDS9235.1    | -2.223129084 | -0.227618626 | 37.81235667 |
| C8orf47:CCDS55266.1 | -2.378060479 | -0.636486932 | 37.79507107 |
| ACOT11:CCDS592.1    | -1.248505087 | 1.798383599  | 37.75708226 |

## TAUvsControls

|                     |              |              |             |
|---------------------|--------------|--------------|-------------|
| NLRP1:CCDS42246.1   | -1.234380609 | 2.297155596  | 37.73177988 |
| UGT2B4:CCDS43234.1  | -2.127546961 | 0.544336074  | 37.72686555 |
| CRYBB2:CCDS13831.1  | -3.309418017 | 5.658999228  | 37.72213653 |
| MYOCD:CCDS11163.1   | -1.848486647 | 1.657885987  | 37.70742589 |
| PAPPA2:CCDS41439.1  | -1.476660625 | 2.03991266   | 37.70567781 |
| CD96:CCDS2959.1     | -2.153948285 | 1.033528343  | 37.70425047 |
| TERT:CCDS3861.2     | -1.591102393 | 2.326893151  | 37.69907886 |
| SLC6A4:CCDS11256.1  | -2.155423671 | 1.06405397   | 37.6787664  |
| ZBP1:CCDS54477.1    | -2.157422043 | 0.64254524   | 37.66327014 |
| ANXA8:CCDS31194.1   | -2.290429365 | 2.145981702  | 37.66085229 |
| BEND2:CCDS55375.1   | -2.073776644 | 0.967498288  | 37.62897768 |
| HNF4A:CCDS46605.1   | -2.117063922 | 0.931727158  | 37.61307285 |
| TBXAS1:CCDS5856.1   | -1.600997841 | 0.842378379  | 37.57763599 |
| BMP10:CCDS1890.1    | -2.274598392 | 0.501506098  | 37.56494214 |
| LAD1:CCDS1410.1     | -1.756016017 | 0.923651435  | 37.5461069  |
| VAV1:CCDS12174.1    | -1.461828645 | 1.755927271  | 37.51045329 |
| ETV7:CCDS56423.1    | -2.134372735 | 0.483617143  | 37.50471845 |
| OAS1:CCDS31905.1    | -2.216791092 | 0.869982829  | 37.49403918 |
| CXorf30:CCDS55396.1 | -1.674381114 | 0.947966578  | 37.46900083 |
| C5orf60:CCDS47353.1 | -2.205820794 | -0.149892244 | 37.44649933 |
| FMO1:CCDS1294.1     | -2.593185758 | 1.617184981  | 37.43072208 |
| DLX3:CCDS11556.1    | -2.215713985 | 0.091895965  | 37.36849135 |
| H1FNT:CCDS8762.1    | -2.262299757 | -0.283799186 | 37.30827034 |
| TAGAP:CCDS5262.1    | -2.062463261 | 0.590490283  | 37.30649971 |
| HCRTR1:CCDS344.1    | -1.796511027 | 0.778722013  | 37.29764271 |
| PLD4:CCDS9995.2     | -2.197491439 | 0.775333775  | 37.28599855 |
| CLRN2:CCDS47032.1   | -2.201271666 | 0.113667433  | 37.28016855 |
| MMP21:CCDS7647.1    | -2.068495254 | 0.566065938  | 37.27119227 |
| PRLR:CCDS56359.1    | -2.327373258 | 0.399938239  | 37.25427588 |
| PSG5:CCDS12617.1    | -2.354375805 | 0.293571058  | 37.24428672 |
| TMPRSS2:CCDS54486.1 | -2.088547616 | 1.169451488  | 37.24237759 |
| TCP10L2:CCDS47514.1 | -2.202878702 | 0.204183397  | 37.24136526 |
| ADH7:CCDS34034.1    | -2.151455012 | 0.275328753  | 37.2270167  |
| FCER2:CCDS12184.1   | -2.116778592 | 0.349937131  | 37.21043785 |
| KCNA10:CCDS826.1    | -2.065266176 | 0.288876946  | 37.14648089 |
| C2orf78:CCDS46338.1 | -2.138349868 | 1.083528825  | 37.14529688 |
| PARVG:CCDS14057.1   | -1.675222316 | 0.696678074  | 37.13998924 |
| KCNA5:CCDS8536.1    | -1.444137236 | 1.349853074  | 37.13927997 |
| DAPL1:CCDS33307.1   | -2.702739676 | 3.601008895  | 37.13109242 |
| SLC22A14:CCDS2677.1 | -2.066063127 | 0.906404219  | 37.12720029 |
| DSC1:CCDS11894.1    | -1.387766338 | 1.494258608  | 37.11514919 |
| USH1C:CCDS7825.1    | -1.766644299 | 2.295433546  | 37.06499153 |
| HTR4:CCDS34271.1    | -2.157831166 | 0.399468046  | 37.06304983 |
| NOD2:CCDS10746.1    | -1.39564895  | 1.552697123  | 37.04131034 |
| NXF5:CCDS14491.2    | -2.159430428 | 0.483067421  | 37.03073163 |
| TINAGL1:CCDS55586.1 | -1.764916945 | 1.971863494  | 37.0302877  |
| KRT6C:CCDS8829.1    | -1.74910441  | 0.968716645  | 37.00952637 |
| TAF7L:CCDS35347.1   | -1.70882899  | 0.872326036  | 37.00533915 |
| BTK:CCDS14482.1     | -1.577025868 | 1.180720407  | 36.96591148 |
| FCRL1:CCDS53382.1   | -2.121264721 | 0.55179817   | 36.95784136 |
| FCGR2B:CCDS53414.1  | -2.110433317 | 0.313722196  | 36.94438998 |

## TAUvsControls

|                      |              |              |             |
|----------------------|--------------|--------------|-------------|
| SLCO2B1:CCDS53679.1  | -2.029205574 | 1.078604434  | 36.91674467 |
| SPINK5:CCDS43382.1   | -1.097615271 | 2.323624508  | 36.88457379 |
| CYTH4:CCDS13946.1    | -2.178510263 | 1.109445516  | 36.85287356 |
| FAM83B:CCDS34479.1   | -2.10070217  | 1.11703879   | 36.84858433 |
| CXCR5:CCDS8402.1     | -2.168259417 | -0.090604707 | 36.8368812  |
| TTC34:CCDS55565.1    | -2.044605696 | 0.697329014  | 36.8314369  |
| NLRP1:CCDS42245.1    | -1.224232013 | 2.255954161  | 36.82919548 |
| ITIH1:CCDS54594.1    | -1.291131573 | 1.675271717  | 36.81102627 |
| RBM1E:CCDS35481.1    | -2.112751041 | 0.818857762  | 36.80767412 |
| ACOT11:CCDS593.1     | -1.227900976 | 1.854453837  | 36.79089079 |
| KRT25:CCDS11373.1    | -2.124035398 | 0.520170132  | 36.77321567 |
| KIR3DL1:CCDS42621.1  | -2.09270766  | 0.758819466  | 36.76314043 |
| PCK1:CCDS13460.1     | -1.557300593 | 1.076837837  | 36.74805156 |
| TMPRSS11D:CCDS3518.1 | -2.119358092 | 0.535067109  | 36.73829444 |
| KRT9:CCDS32654.1     | -2.110538406 | 1.023812534  | 36.72900509 |
| CD96:CCDS2958.1      | -2.131377276 | 0.976062579  | 36.72736163 |
| UTY:CCDS14785.1      | -1.660164054 | 2.958408498  | 36.72418131 |
| TINAGL1:CCDS343.1    | -1.772698102 | 2.139714103  | 36.72337781 |
| PABPN1L:CCDS45547.2  | -1.766104718 | 0.256866099  | 36.70344629 |
| CSHL1:CCDS45759.1    | -2.32668228  | -0.363543064 | 36.69000026 |
| MAG:CCDS12456.1      | -2.07540736  | 1.016692919  | 36.68317532 |
| ETV7:CCDS56424.1     | -2.183593424 | 0.619596474  | 36.65353466 |
| OTOP2:CCDS11708.1    | -1.760767732 | 0.710166787  | 36.64844886 |
| CASP1:CCDS8330.1     | -2.307039628 | 1.578513149  | 36.63852968 |
| CD244:CCDS53399.1    | -2.165962699 | 0.582772242  | 36.63811409 |
| CYP4F12:CCDS42517.1  | -2.044029009 | 0.710734524  | 36.6314895  |
| CD209:CCDS45952.1    | -2.066993181 | 0.62872266   | 36.62952591 |
| ACTL7A:CCDS6772.1    | -1.749366809 | 0.252892391  | 36.60057512 |
| MAG:CCDS56090.1      | -2.08706717  | 0.968566509  | 36.55995206 |
| UNC93A:CCDS5300.1    | -2.062192137 | 0.573645923  | 36.5364013  |
| C12orf50:CCDS9031.1  | -2.128480509 | 0.697245901  | 36.52428829 |
| MOG:CCDS34367.1      | -1.715693394 | 0.657310787  | 36.52170525 |
| SAG:CCDS46545.1      | -2.092646863 | 0.939953446  | 36.49376417 |
| MOG:CCDS47395.2      | -1.785699316 | 0.480684155  | 36.49116101 |
| GRAPL:CCDS45627.1    | 5.552688599  | 7.043386177  | 36.47734069 |
| CD8B:CCDS1994.1      | -2.247700698 | -0.141380334 | 36.44526611 |
| ALAS2:CCDS43960.1    | -1.504995518 | 1.140705187  | 36.39378819 |
| C3AR1:CCDS8588.1     | -2.134852578 | 0.286815241  | 36.37999035 |
| GFRA4:CCDS13056.1    | -2.258209542 | -0.135516335 | 36.37748917 |
| PTPN22:CCDS864.2     | -2.110728833 | 1.528457248  | 36.37021342 |
| SLA2:CCDS13282.1     | -2.113464867 | 0.257044977  | 36.36819594 |
| KRT36:CCDS11395.1    | -2.042597565 | 0.588026514  | 36.36155826 |
| ERAP2:CCDS4086.1     | -1.519439542 | 1.770054476  | 36.34435035 |
| DRD5:CCDS3405.1      | -2.195407761 | 0.309958527  | 36.32592462 |
| CLEC12A:CCDS55803.1  | -2.126012649 | 0.038949644  | 36.31321941 |
| KRT28:CCDS11376.1    | -2.116639374 | 0.342139047  | 36.29371903 |
| KRT80:CCDS8821.2     | -1.766279063 | 1.054554869  | 36.24563298 |
| OAS3:CCDS44981.1     | -1.71061828  | 2.162246521  | 36.23608404 |
| LILRA2:CCDS12900.1   | -2.041840483 | 0.875355513  | 36.23384693 |
| DNTT:CCDS7447.1      | -1.510958513 | 0.754402694  | 36.22427346 |
| CYP11B1:CCDS34953.1  | -2.104792517 | 0.589229651  | 36.22325303 |

## TAUvsControls

|                       |              |              |             |
|-----------------------|--------------|--------------|-------------|
| GFI1B:CCDS48049.1     | -2.163546651 | -0.211886055 | 36.21975493 |
| GHRHR:CCDS5432.1      | -2.044461787 | 1.024365599  | 36.21009898 |
| AGBL3:CCDS47718.1     | -1.260092189 | 1.581566724  | 36.20791949 |
| MICALCL:CCDS41620.1   | -1.37891874  | 1.207399748  | 36.18327625 |
| OR5B21:CCDS31552.1    | -2.218362186 | -0.32622952  | 36.18139098 |
| DNTT:CCDS44465.1      | -1.51022592  | 0.753687133  | 36.17758894 |
| KRT79:CCDS8839.1      | -2.004635179 | 0.715814338  | 36.17393585 |
| HELT:CCDS34113.1      | -2.130823844 | 0.30416157   | 36.16018864 |
| PLCZ1:CCDS8680.1      | -2.064186162 | 1.274200144  | 36.15705937 |
| CHI3L1:CCDS1435.1     | -1.543018423 | 1.187396642  | 36.11748776 |
| DRD3:CCDS2978.1       | -2.548978063 | 0.312483567  | 36.10491662 |
| TMPRSS11A:CCDS3519.1  | -2.065591983 | 0.4697715    | 36.09789304 |
| TAF7L:CCDS55466.1     | -1.688385095 | 0.663629277  | 36.05181121 |
| SLC28A1:CCDS10334.1   | -1.555510724 | 1.307773121  | 36.05039357 |
| BLK:CCDS5982.1        | -2.040192438 | 0.800777507  | 36.04038874 |
| SIM1:CCDS5045.1       | -1.601865923 | 1.117803635  | 36.03558337 |
| CCDC83:CCDS8271.1     | -2.094759728 | 0.753119264  | 35.98548574 |
| HTR4:CCDS34270.1      | -2.131208569 | 0.420029986  | 35.98430698 |
| TPH1:CCDS7829.1       | -2.321043633 | 1.267851168  | 35.96381641 |
| CYP2C18:CCDS44460.1   | -1.736230235 | 0.419356549  | 35.96252436 |
| SULT2A1:CCDS12707.1   | -2.161688782 | 0.361010534  | 35.9603568  |
| TM4SF1:CCDS3143.1     | -2.403484342 | 2.116729937  | 35.94998959 |
| F7:CCDS9528.1         | -2.238419302 | 1.144964035  | 35.92819761 |
| NMS:CCDS33259.1       | -2.527886914 | -0.546989397 | 35.91135743 |
| CLEC14A:CCDS9667.1    | -2.070998867 | 0.172404161  | 35.86629605 |
| KRTAP16-1:CCDS56032.1 | -2.02315064  | 0.395017833  | 35.85807518 |
| RBM1B:CCDS35479.1     | -2.076519247 | 0.797041999  | 35.85755516 |
| MEOX1:CCDS11467.1     | -1.722860778 | 0.233467654  | 35.85325411 |
| PADI2:CCDS177.1       | -1.493829038 | 2.349827444  | 35.8527055  |
| TMPRSS11A:CCDS47065.1 | -2.056939832 | 0.442965987  | 35.83775276 |
| UTY:CCDS14783.1       | -1.978291907 | 3.287317162  | 35.83109693 |
| KRT72:CCDS8833.1      | -2.029501755 | 1.048610571  | 35.82781142 |
| SLC22A3:CCDS5277.1    | -1.737638471 | 1.05600237   | 35.82314133 |
| CD244:CCDS1210.1      | -2.149655637 | 0.572834609  | 35.78251253 |
| BTNL8:CCDS4459.1      | -2.079332193 | 0.534401238  | 35.77068993 |
| F13B:CCDS1388.1       | -2.066151202 | 0.925582708  | 35.762277   |
| DRD3:CCDS33829.1      | -2.520248911 | 0.276797397  | 35.73095203 |
| PADI1:CCDS178.1       | -1.425912264 | 1.162722348  | 35.71013054 |
| HTR4:CCDS34273.2      | -2.138130924 | 0.376474219  | 35.68902344 |
| GUCY2C:CCDS8664.1     | -2.206902601 | 2.134795761  | 35.68642966 |
| TBR1:CCDS33310.1      | -2.192150871 | 4.383613496  | 35.68532793 |
| LY9:CCDS30916.1       | -1.997259156 | 1.040769293  | 35.67219478 |
| SAMSN1:CCDS42906.1    | -2.214987358 | 0.814602097  | 35.66391229 |
| NLGN4Y:CCDS55553.1    | -1.708192614 | 0.96228221   | 35.66297304 |
| SDR16C5:CCDS6167.1    | -2.204173733 | 0.01233301   | 35.66223643 |
| HLA-DRB5:CCDS4751.1   | -2.150857426 | 0.030500355  | 35.66124827 |
| NOX3:CCDS5250.1       | -2.074933345 | 0.584223524  | 35.65045397 |
| KLK6:CCDS12811.1      | -2.317612892 | 0.381224386  | 35.64750786 |
| CLEC12A:CCDS8608.1    | -2.126822505 | -0.07157995  | 35.62303491 |
| TCP10:CCDS43527.1     | -2.126815803 | 0.210692482  | 35.6180472  |
| SPATA16:CCDS3221.1    | -2.054450306 | 0.743988842  | 35.61496018 |

## TAUvsControls

|                      |              |              |             |
|----------------------|--------------|--------------|-------------|
| GPR87:CCDS3157.1     | -2.259735181 | 0.037877042  | 35.61210519 |
| ABCG5:CCDS1814.1     | -2.062283786 | 1.175764711  | 35.60290276 |
| SLC12A8:CCDS43143.1  | -1.524930326 | 2.602052267  | 35.60174074 |
| KRT13:CCDS11397.1    | -2.043286585 | 0.789271219  | 35.57612573 |
| OR56A3:CCDS41614.1   | -2.259001688 | -0.479754907 | 35.52900191 |
| PTGER3:CCDS655.1     | -1.406606326 | 1.217208829  | 35.52629648 |
| PRSS42:CCDS46816.1   | -2.160064135 | -0.125504283 | 35.52149852 |
| WNT10A:CCDS2426.1    | -2.062315741 | 0.450117374  | 35.51560727 |
| ADAM29:CCDS3823.1    | -2.11113545  | 0.843793977  | 35.51333348 |
| SUSD3:CCDS6701.1     | -2.428675721 | 0.119694952  | 35.50629822 |
| GSDMC:CCDS6360.1     | -2.077509511 | 0.694467083  | 35.44819    |
| MFAP5:CCDS8595.1     | -2.882533887 | 2.554368709  | 35.43897739 |
| ACE2:CCDS14169.1     | -1.25000066  | 1.259425953  | 35.42388884 |
| CYP2C8:CCDS7438.1    | -1.701121313 | 0.640948645  | 35.40506394 |
| BEST2:CCDS42506.1    | -1.535787509 | 0.770309769  | 35.37802288 |
| FCAMR:CCDS41460.1    | -2.095291363 | 0.346148499  | 35.37684381 |
| GALNTL5:CCDS5929.1   | -2.122408915 | 0.3068698    | 35.3554762  |
| PNLIPRP3:CCDS31292.1 | -2.101340358 | 0.482920409  | 35.35180447 |
| CEBPE:CCDS9589.1     | -2.24022163  | -0.651665933 | 35.34380863 |
| METTL11B:CCDS44275.1 | -2.177911183 | -0.241927785 | 35.33529064 |
| HSD17B3:CCDS6716.1   | -2.071086039 | 0.363732614  | 35.33146791 |
| SCIN:CCDS47546.1     | -2.552600583 | 1.005075113  | 35.32722778 |
| HLA-DRB1:CCDS47409.1 | -1.801668418 | 0.571370901  | 35.31533494 |
| PNPLA7:CCDS7045.1    | -1.129024501 | 2.660533539  | 35.30118147 |
| CYP4F22:CCDS12331.1  | -1.481882657 | 0.552623988  | 35.28586124 |
| CTAGE4:CCDS55176.1   | -1.692449179 | 0.550203056  | 35.2646161  |
| CLDN16:CCDS3296.1    | -2.222112465 | -0.082225995 | 35.24996078 |
| MMP1:CCDS8322.1      | -3.017796951 | 2.102394494  | 35.23871002 |
| FAM3B:CCDS13671.1    | -2.247934369 | 0.10646984   | 35.23527999 |
| ENDOU:CCDS8754.1     | -1.621892317 | 0.647332624  | 35.22460919 |
| CDA:CCDS210.1        | -2.378530248 | -0.34890537  | 35.21962652 |
| ADAM30:CCDS907.1     | -2.061741406 | 0.613169787  | 35.21593891 |
| SERPIN2:CCDS11989.1  | -2.392732768 | 0.776768802  | 35.19802759 |
| DAZ3:CCDS35489.1     | -2.16826282  | 0.439484968  | 35.18000363 |
| HNF4A:CCDS42876.1    | -2.072151547 | 0.868853816  | 35.15219536 |
| WT1:CCDS44562.1      | -1.646289088 | 1.667439806  | 35.14551102 |
| KRT6B:CCDS8828.1     | -1.685283945 | 1.031327134  | 35.1349291  |
| MAGEA12:CCDS14710.1  | -2.107184857 | -0.044041575 | 35.11263224 |
| BTNL8:CCDS54957.1    | -2.050204768 | 0.474188213  | 35.1045201  |
| OR6C75:CCDS31820.1   | -2.242589317 | -0.553086531 | 35.1030983  |
| BTNL8:CCDS54958.1    | -2.064179639 | 0.418751816  | 35.0921117  |
| SLC25A45:CCDS41670.1 | -1.860862181 | 0.441472972  | 35.0791308  |
| DMRT1:CCDS6442.1     | -2.056056418 | 0.365674935  | 35.07874311 |
| CPM:CCDS8987.1       | -2.065118539 | 0.857613645  | 35.04061444 |
| SPINK5:CCDS47300.1   | -1.049420069 | 2.377135463  | 35.03753315 |
| LRRRC66:CCDS43229.1  | -1.312898105 | 1.140612004  | 35.02024128 |
| OR5D14:CCDS31508.1   | -2.167834575 | -0.452274886 | 35.01081892 |
| WT1:CCDS7878.2       | -1.642254515 | 1.678392376  | 35.00872212 |
| NBPF6:CCDS44184.1    | -1.598032327 | 1.184537035  | 35.00674739 |
| PRRG4:CCDS7881.1     | -2.114272109 | -0.309196054 | 34.98713303 |
| F7:CCDS9529.1        | -2.21596345  | 1.030642172  | 34.97030944 |

TAUvsControls

|                      |              |              |             |
|----------------------|--------------|--------------|-------------|
| BPIFA3:CCDS42865.1   | -2.231392355 | -0.256954067 | 34.96080932 |
| CSF2RB:CCDS13936.1   | -1.435670414 | 1.680671541  | 34.94833042 |
| HPSE2:CCDS53566.1    | -2.196020567 | 0.803885408  | 34.92797192 |
| NLRP1:CCDS42244.1    | -1.203186579 | 2.26442781   | 34.91283459 |
| IL7R:CCDS3911.1      | -2.192202558 | 0.589650843  | 34.9055135  |
| DENND2D:CCDS831.1    | -2.18269868  | 1.053954004  | 34.89960747 |
| MOG:CCDS54977.1      | -1.724470579 | 0.425714305  | 34.89861585 |
| CNTD2:CCDS12551.2    | -2.296737275 | 0.342666228  | 34.89838946 |
| SYCE1:CCDS44501.1    | -2.620232352 | 0.975906188  | 34.89539824 |
| AKR1D1:CCDS5846.1    | -2.130679561 | 0.313366624  | 34.89340143 |
| FAM151A:CCDS594.1    | -1.529934292 | 1.138052996  | 34.88216952 |
| SLC22A16:CCDS5084.1  | -2.16155796  | 0.574886458  | 34.85631355 |
| CLEC10A:CCDS11087.1  | -2.022991841 | 0.477600145  | 34.85358165 |
| OAS1:CCDS44980.1     | -2.136233257 | 0.704964509  | 34.84430904 |
| LIPF:CCDS55718.1     | -2.082885197 | 0.397814787  | 34.79346888 |
| TNS4:CCDS11368.1     | -2.097338376 | 1.136680618  | 34.77240982 |
| ZFY:CCDS48200.1      | -1.571260414 | 1.343496139  | 34.77218733 |
| WDR72:CCDS10151.1    | -1.758997761 | 1.779693526  | 34.77166536 |
| CASP1:CCDS8329.1     | -2.21850806  | 1.399283784  | 34.71123286 |
| OR2AT4:CCDS31639.1   | -2.216511097 | -0.24067992  | 34.70940328 |
| SLCO4A1:CCDS13501.1  | -1.346380225 | 2.393717357  | 34.69257256 |
| OAS1:CCDS41838.1     | -2.226608015 | 0.900991842  | 34.68897631 |
| RBMY1A1:CCDS14796.1  | -2.111881965 | 0.682514704  | 34.65440502 |
| DAZL:CCDS54556.1     | -2.148917676 | 0.332224764  | 34.65153292 |
| XG:CCDS48073.1       | -2.213825701 | 0.104517868  | 34.65012673 |
| ODF4:CCDS11140.1     | -2.08823185  | 0.270758629  | 34.6415467  |
| DCAF8L1:CCDS35222.1  | -2.007264082 | 0.450358827  | 34.61994951 |
| TAS2R40:CCDS43662.1  | -2.219308302 | -0.490773908 | 34.59550421 |
| VDR:CCDS55820.1      | -1.468388111 | 1.43093782   | 34.59417371 |
| FSIP2:CCDS54426.1    | -1.059276282 | 3.983937854  | 34.58829772 |
| KNG1:CCDS43183.1     | -1.946244391 | 1.144302726  | 34.58800202 |
| LRRD1:CCDS55124.1    | -1.702288305 | 1.087215171  | 34.57803271 |
| NPFFR2:CCDS47072.1   | -2.144237416 | 0.408223747  | 34.57723289 |
| HNF4A:CCDS13331.1    | -2.043012816 | 0.729608752  | 34.57688212 |
| CLCA1:CCDS709.1      | -2.07858159  | 1.501609658  | 34.55231774 |
| HK3:CCDS4407.1       | -1.220298158 | 1.469924881  | 34.53905242 |
| GPR78:CCDS3403.1     | -2.101255122 | -0.060144557 | 34.52899995 |
| MB21D1:CCDS4978.1    | -2.063269653 | 0.259840213  | 34.50494651 |
| HNF4A:CCDS46604.1    | -2.055985951 | 0.820927351  | 34.49039489 |
| C14orf105:CCDS9730.1 | -2.102616712 | 0.204800403  | 34.48382959 |
| PTH2R:CCDS2383.1     | -2.032605156 | 0.885818944  | 34.48046465 |
| MARCH10:CCDS11635.1  | -1.345219694 | 1.677852771  | 34.47275298 |
| KLK2:CCDS12808.1     | -2.186147698 | 0.175851245  | 34.45807463 |
| KRT24:CCDS11372.1    | -2.007137004 | 0.823072358  | 34.43304868 |
| CYLC2:CCDS35085.1    | -2.08320018  | 0.008485011  | 34.40937011 |
| DCT:CCDS45060.1      | -1.583890794 | 2.70708241   | 34.40269302 |
| CYLC1:CCDS35341.1    | -2.057911787 | 0.659438418  | 34.38292674 |
| FOXI1:CCDS4372.1     | -2.064201549 | 0.024572536  | 34.37799442 |
| FAM180A:CCDS5841.1   | -2.268615702 | -0.694786575 | 34.36904097 |
| C10orf71:CCDS44387.1 | -2.377663095 | 1.771987311  | 34.36505806 |
| KLK2:CCDS42597.1     | -2.202803672 | 0.094261138  | 34.35440673 |

TAUvsControls

|                     |              |              |             |
|---------------------|--------------|--------------|-------------|
| PKD4:CCDS5643.1     | -2.188114394 | 0.475589817  | 34.3492442  |
| ABCA13:CCDS47584.1  | -1.149219022 | 3.740595364  | 34.34364482 |
| ABCA12:CCDS33373.1  | -1.151422824 | 2.938164993  | 34.34251672 |
| TERT:CCDS54831.1    | -1.545755968 | 2.272492533  | 34.33674137 |
| TNFRSF9:CCDS92.1    | -2.072232998 | 0.646032097  | 34.32930291 |
| POU2F3:CCDS8431.1   | -2.176893113 | 0.852998701  | 34.30873693 |
| FMO3:CCDS1292.1     | -2.065385364 | 0.789477441  | 34.30257631 |
| PRAMEF1:CCDS148.1   | -2.120823385 | 0.299074738  | 34.29218732 |
| TMPRSS2:CCDS33564.1 | -2.016023259 | 1.058518253  | 34.28291916 |
| MOGAT1:CCDS46524.1  | -2.104150511 | -0.183237172 | 34.25979068 |
| PSG1:CCDS12612.1    | -2.21928614  | 0.505387807  | 34.24934823 |
| KRT72:CCDS53795.1   | -2.029251543 | 0.84612452   | 34.24860815 |
| SYCE1:CCDS44500.1   | -2.620295099 | 0.921775442  | 34.24747836 |
| EPN3:CCDS11570.1    | -1.523989275 | 1.352418724  | 34.24669996 |
| NCF4:CCDS13934.1    | -2.054830817 | 0.660400545  | 34.24619617 |
| GNA15:CCDS12104.1   | -1.584079275 | 0.313307777  | 34.23353021 |
| MYOC:CCDS1297.1     | -2.005126212 | 0.432239416  | 34.23071755 |
| CD5L:CCDS1171.1     | -2.076745108 | 0.063269278  | 34.22636184 |
| TM4SF19:CCDS3316.1  | -1.845330389 | 0.436142406  | 34.21769787 |
| MAGEC3:CCDS14677.1  | -2.088849498 | 0.066268356  | 34.21198058 |
| CDH5:CCDS10804.1    | -2.167776223 | 1.379735581  | 34.18913837 |
| PTPN20B:CCDS41515.1 | -2.000966169 | 0.622505247  | 34.12063984 |
| PAPL:CCDS33018.1    | -2.195454433 | 0.4962953    | 34.1102619  |
| GPR141:CCDS5451.1   | -2.129775795 | 0.618844547  | 34.10534019 |
| EFCAB4B:CCDS8522.1  | -2.029284867 | 0.648407984  | 34.10212603 |
| LOXHD1:CCDS45861.1  | -1.627883884 | 2.101303951  | 34.10168801 |
| DAZL:CCDS43059.1    | -2.128974836 | 0.18268606   | 34.0844041  |
| MAGEA1:CCDS14720.1  | -2.162051288 | -0.270033381 | 34.08074056 |
| UTY:CCDS14784.1     | -1.922632351 | 3.152650987  | 34.07714703 |
| SUN5:CCDS13209.1    | -2.044089674 | 0.45838805   | 34.07487588 |
| CLEC12B:CCDS44830.1 | -2.183378186 | -0.142519503 | 34.06652462 |
| HOXB13:CCDS11536.1  | -2.316582746 | -0.349399342 | 34.05854482 |
| GPR101:CCDS14662.1  | -2.157079925 | 0.59909022   | 34.05473691 |
| CYP3A43:CCDS5675.1  | -2.036318195 | 1.462262119  | 34.05073403 |
| LRRRC38:CCDS53269.1 | -2.185859091 | -0.325041798 | 34.04019274 |
| UPK3B:CCDS5589.1    | -1.450108548 | 2.052186909  | 34.0370641  |
| TLX2:CCDS1947.1     | -2.189280635 | -0.42371304  | 34.02135446 |
| CYP3A43:CCDS5676.1  | -2.035519852 | 1.461444812  | 34.01605095 |
| CD1C:CCDS1175.1     | -2.060900957 | 0.157962815  | 34.00614692 |
| BSPRY:CCDS43868.1   | -1.60708056  | 0.486580196  | 33.99477829 |
| GSG1:CCDS44836.1    | -1.212262065 | 1.843441417  | 33.99269102 |
| PTPN20B:CCDS41513.1 | -1.959962533 | 1.234924576  | 33.94785454 |
| CD1E:CCDS41417.1    | -2.139672743 | 1.024402642  | 33.94253545 |
| SIRPB2:CCDS42849.1  | -2.082065964 | 0.381084378  | 33.92271368 |
| UNC93A:CCDS47515.1  | -2.016026247 | 0.382561077  | 33.91599341 |
| FOXI1:CCDS47337.1   | -2.111030591 | -0.448100736 | 33.8353665  |
| GIF:CCDS7977.1      | -2.040618008 | 0.548702063  | 33.83236287 |
| PNPLA7:CCDS48070.1  | -1.110143094 | 2.688128502  | 33.83177771 |
| TAC4:CCDS42357.1    | -2.216470117 | 0.114750336  | 33.82126792 |
| ALAS2:CCDS14366.1   | -1.471104902 | 1.179554761  | 33.80578952 |
| HHEX:CCDS7423.1     | -2.296953119 | -0.295228705 | 33.80575084 |

## TAUvsControls

|                       |              |              |             |
|-----------------------|--------------|--------------|-------------|
| C16orf54:CCDS10652.1  | -2.277228295 | -0.615340007 | 33.79533941 |
| KLK8:CCDS12813.1      | -1.907998962 | 0.796435328  | 33.78033894 |
| KRT38:CCDS11392.1     | -2.036554989 | 0.399924264  | 33.77097288 |
| GPR114:CCDS10785.1    | -2.110834834 | 0.949294221  | 33.74811835 |
| SLA2:CCDS13283.1      | -2.090246405 | 0.041836582  | 33.70914375 |
| OBP2A:CCDS6992.1      | -2.093350348 | 0.112056282  | 33.7087356  |
| DLX4:CCDS11555.1      | -2.295192089 | -0.172684901 | 33.70686043 |
| XG:CCDS14120.1        | -2.210219432 | -0.039686047 | 33.6908995  |
| CASP5:CCDS44719.1     | -2.154474085 | 1.125718594  | 33.67751595 |
| GSTT2:CCDS13821.1     | -3.045026901 | 1.02749213   | 33.67296504 |
| THEG:CCDS12025.1      | -1.533430894 | 0.503484269  | 33.65763307 |
| CA1:CCDS6237.1        | -1.994477395 | 0.302961522  | 33.64621165 |
| CTAGE1:CCDS45837.1    | -1.55934872  | 0.465373851  | 33.63557512 |
| POU4F3:CCDS4281.1     | -1.732749831 | 0.067896113  | 33.63014437 |
| RAX:CCDS11972.1       | -3.040004155 | 3.439769068  | 33.61651664 |
| C6orf222:CCDS34439.1  | -1.423043627 | 0.92825172   | 33.60507604 |
| ITGBL1:CCDS9499.1     | -2.435063423 | 1.604766838  | 33.58785494 |
| HAO1:CCDS13100.1      | -2.102656599 | 0.055797556  | 33.5689765  |
| AQP6:CCDS31798.1      | -2.311752954 | -0.143632115 | 33.55927137 |
| HTRA4:CCDS6110.1      | -2.081576962 | 0.344873136  | 33.55023361 |
| MYH1:CCDS11155.1      | -3.049796826 | 3.337232229  | 33.54276318 |
| BTN1A1:CCDS4614.1     | -1.9805822   | 0.598911041  | 33.52751366 |
| CHIA:CCDS832.1        | -2.01924596  | 0.535578248  | 33.5208895  |
| EFCAB5:CCDS11254.2    | -1.259019292 | 2.557127111  | 33.51377643 |
| CD1E:CCDS41418.1      | -2.138880378 | 0.983254776  | 33.51111733 |
| SPATS1:CCDS4911.1     | -2.127914827 | 0.267440929  | 33.48933397 |
| FFAR3:CCDS12459.1     | -2.043797015 | 0.160824405  | 33.47655694 |
| SLC46A2:CCDS6786.1    | -2.054257605 | 0.278853408  | 33.47505271 |
| SLC10A1:CCDS9797.1    | -2.11451974  | 0.11407638   | 33.46801104 |
| C1orf141:CCDS30745.1  | -2.084629459 | 0.961292689  | 33.4454059  |
| IGFL1:CCDS46123.1     | -2.298153548 | -0.68668852  | 33.43849044 |
| ENDOU:CCDS53784.1     | -1.573640768 | 0.431927786  | 33.419692   |
| SYTL5:CCDS14244.1     | -1.697430308 | 2.16704124   | 33.41576776 |
| ALAS2:CCDS35303.1     | -1.464463555 | 1.05978706   | 33.41089448 |
| OTC:CCDS14247.1       | -1.678827681 | 0.366072073  | 33.38963131 |
| TGFA:CCDS46316.1      | -2.662913974 | 0.518141533  | 33.37874062 |
| FAM170A:CCDS43353.1   | -2.16768759  | 0.433240424  | 33.36431609 |
| HTR1A:CCDS34168.1     | -2.304688409 | 0.126214205  | 33.35765929 |
| OAS2:CCDS31906.1      | -1.659014835 | 1.166295043  | 33.35632576 |
| PTGER3:CCDS652.1      | -1.379284772 | 1.061504461  | 33.35568884 |
| RAD51AP2:CCDS42656.1  | -1.575683152 | 1.328642755  | 33.34738731 |
| SAMD7:CCDS3209.1      | -1.973216111 | 0.503327232  | 33.34291771 |
| C14orf166B:CCDS9853.2 | -2.137503774 | 0.752701047  | 33.33046976 |
| TFEC:CCDS5762.1       | -2.055471832 | 0.198278508  | 33.3094608  |
| TP63:CCDS46976.1      | -2.271836654 | 1.205797635  | 33.2993425  |
| CASP1:CCDS53704.1     | -2.191428384 | 1.18966585   | 33.28860043 |
| PSG1:CCDS54275.1      | -2.19777633  | 0.507454007  | 33.28733377 |
| LRGUK:CCDS5830.1      | -1.264493017 | 1.449305683  | 33.276212   |
| MEP1B:CCDS45846.1     | -1.500741959 | 1.178618878  | 33.26493761 |
| FCN2:CCDS6983.1       | -2.014501031 | 0.110213408  | 33.25112769 |
| TTLL2:CCDS5301.1      | -1.662921651 | 0.532528411  | 33.23958638 |



## TAUvsControls

|                      |              |              |             |
|----------------------|--------------|--------------|-------------|
| FERMT1:CCDS13098.1   | -2.059248303 | 1.303449695  | 33.22490881 |
| SOX17:CCDS6159.1     | -2.059357119 | -0.151064399 | 33.22072693 |
| FREM3:CCDS54808.1    | -2.548627268 | 2.604526464  | 33.22041334 |
| MYCBPAP:CCDS32680.2  | -1.40446766  | 1.908488235  | 33.21791742 |
| LRRK2:CCDS31774.1    | -1.420840332 | 2.990743864  | 33.21700649 |
| FMO5:CCDS44210.1     | -2.152537472 | -0.027302087 | 33.20817859 |
| IL21:CCDS3727.1      | -2.202850831 | -0.439542804 | 33.18023009 |
| ANKRD22:CCDS7390.1   | -2.272653938 | -0.505798644 | 33.17606018 |
| CCDC169:CCDS55897.1  | -2.253710566 | 4.048125124  | 33.17232701 |
| SYCE1:CCDS7687.1     | -2.574979091 | 0.777011558  | 33.16650355 |
| MUC5B:CCDS44515.2    | -1.309609878 | 4.255467199  | 33.15178098 |
| CLEC12A:CCDS8609.1   | -2.097699748 | -0.269013697 | 33.15043048 |
| NGF:CCDS882.1        | -1.580582854 | 0.848471266  | 33.14798909 |
| ACVR1C:CCDS2205.1    | -2.108041053 | 0.67458094   | 33.14559357 |
| APOL5:CCDS13920.1    | -2.033396885 | 0.359973405  | 33.14092159 |
| NCR1:CCDS12911.1     | -2.344493341 | 0.481031583  | 33.13925531 |
| CD3G:CCDS8395.1      | -2.019819824 | 0.243532148  | 33.13642746 |
| PTPN20B:CCDS41514.1  | -1.938748429 | 1.273687177  | 33.13076322 |
| CSH2:CCDS42369.1     | -2.156874228 | 0.068075861  | 33.12195325 |
| ACTL8:CCDS183.1      | -2.202927115 | 0.069613518  | 33.11368048 |
| TGFA:CCDS1905.1      | -2.65344798  | 0.523185655  | 33.10394356 |
| EGR4:CCDS1925.2      | -2.014518919 | 0.696282816  | 33.09576957 |
| F10:CCDS9530.1       | -1.198130901 | 1.404207052  | 33.08120979 |
| FAM71B:CCDS4335.1    | -2.041977158 | 0.420402358  | 33.07761963 |
| GPR152:CCDS8165.1    | -1.988349957 | 0.539676176  | 33.06046987 |
| GLP2R:CCDS11150.1    | -2.069911454 | 1.01114538   | 33.04016458 |
| TEX101:CCDS12619.1   | -2.101961879 | 0.009216075  | 33.02492156 |
| MARVELD2:CCDS34175.1 | -1.30214178  | 1.077920007  | 33.01630431 |
| MLNR:CCDS9414.1      | -2.025484131 | 0.205702837  | 32.9971858  |
| FAM83F:CCDS14000.2   | -2.10009007  | 0.367315708  | 32.98293637 |
| PLG:CCDS5279.1       | -1.547904639 | 1.671210109  | 32.98185558 |
| SLC45A2:CCDS3901.1   | -1.61922553  | 0.836925733  | 32.96563075 |
| LIPC:CCDS10166.1     | -2.03708899  | 0.893089371  | 32.938589   |
| C2orf40:CCDS2072.1   | -2.616020064 | 0.460452115  | 32.92785072 |
| COLEC11:CCDS1649.1   | -1.221536834 | 0.915324619  | 32.92627656 |
| SLC22A8:CCDS53644.1  | -2.155223266 | 0.754393843  | 32.9257121  |
| SLC38A11:CCDS56142.1 | -2.25988691  | 0.495480073  | 32.90659013 |
| KRT75:CCDS8827.1     | -1.506167291 | 1.029266922  | 32.89115152 |
| TBC1D8B:CCDS14523.1  | -1.989651392 | 1.266857845  | 32.8758834  |
| SYTL5:CCDS55399.1    | -1.719916122 | 2.244143844  | 32.86489696 |
| PRAMEF2:CCDS149.1    | -2.188838304 | 0.195004254  | 32.8641128  |
| OTOP3:CCDS11709.1    | -2.051107569 | 0.585085868  | 32.85228061 |
| SP100:CCDS2477.1     | -1.187152724 | 3.109619034  | 32.84947067 |
| GJA8:CCDS30834.1     | -2.040890126 | 0.314504385  | 32.84348945 |
| MYH2:CCDS11156.1     | -3.27211817  | 3.562322641  | 32.84299479 |
| RBP1:CCDS46925.1     | -1.999481129 | 5.297735725  | 32.80382577 |
| RBP1:CCDS46926.1     | -1.969753653 | 5.307105503  | 32.79840802 |
| MFSD6L:CCDS11146.1   | -1.984480284 | 0.234997066  | 32.79199451 |
| BTNL8:CCDS54956.1    | -2.047199148 | 0.424795791  | 32.79197772 |
| CTAGE9:CCDS47475.1   | -1.651597949 | 0.535641521  | 32.77614508 |
| CELA3B:CCDS219.1     | -2.031718872 | 0.06241531   | 32.77331653 |

## TAUvsControls

|                      |              |              |             |
|----------------------|--------------|--------------|-------------|
| OPN4:CCDS31237.1     | -2.150391827 | 1.353648255  | 32.77314149 |
| CLEC10A:CCDS45597.1  | -1.968558655 | 0.394567528  | 32.7611246  |
| PIGR:CCDS1474.1      | -2.272931922 | 1.275058842  | 32.75737879 |
| CASP10:CCDS2340.1    | -2.111939967 | 1.155457464  | 32.75460155 |
| HTR5A:CCDS5936.1     | -1.493491458 | 0.095249742  | 32.75412843 |
| KIR2DL4:CCDS42620.1  | -1.987053311 | 0.998436479  | 32.72595826 |
| FRG2:CCDS34123.1     | -2.094799908 | -0.079095858 | 32.72267028 |
| DDX3Y:CCDS14782.1    | -2.096551015 | 2.827607515  | 32.71447308 |
| AGXT2:CCDS3908.1     | -1.992349092 | 0.644328291  | 32.70748986 |
| NCR1:CCDS46181.1     | -2.335539901 | 0.473956341  | 32.6829932  |
| ENTHD1:CCDS13998.1   | -1.999338641 | 0.487769523  | 32.68249172 |
| GAGE12I:CCDS56601.1  | -2.285961408 | -0.032927498 | 32.65638963 |
| SLCO1B3:CCDS8684.1   | -1.95502747  | 1.131539452  | 32.63817239 |
| HSPA2:CCDS9766.1     | -2.211513714 | 2.263114662  | 32.63019572 |
| IL2RB:CCDS13942.1    | -1.494569952 | 0.769876681  | 32.62185091 |
| SLCO1B1:CCDS8685.1   | -2.01413201  | 0.872621976  | 32.61838136 |
| CLRN1:CCDS35492.1    | -2.328279348 | 0.14071672   | 32.56128389 |
| LILRA3:CCDS12887.1   | -2.012716112 | 0.417030005  | 32.55104743 |
| CAGE1:CCDS54964.1    | -1.388879589 | 1.406528079  | 32.54198642 |
| SH2D4A:CCDS55206.1   | -1.54766127  | 1.023734514  | 32.53796891 |
| C1QL2:CCDS42737.1    | -1.791264337 | -0.54138156  | 32.53763057 |
| CASP10:CCDS2338.1    | -2.088036412 | 1.051183622  | 32.53707045 |
| FCN3:CCDS300.1       | -2.162360849 | 0.48327536   | 32.53706118 |
| OR1D2:CCDS11019.1    | -2.200285138 | -0.468739697 | 32.52529441 |
| IL22RA1:CCDS247.1    | -1.534475731 | 0.671796824  | 32.52195192 |
| IL37:CCDS2103.1      | -2.084387537 | 0.423302916  | 32.51769631 |
| FOXN1:CCDS11232.1    | -1.433982995 | 0.937853456  | 32.5158762  |
| PRAMEF6:CCDS30594.1  | -1.516520853 | 0.231566307  | 32.50778697 |
| LIPF:CCDS7389.1      | -2.03692512  | 0.281754645  | 32.496329   |
| HSF5:CCDS32690.1     | -1.961057009 | 0.517298774  | 32.48806408 |
| TFEC:CCDS34738.1     | -2.049215748 | 0.085715054  | 32.46918727 |
| MPPED2:CCDS7870.1    | -1.265878086 | 3.923688794  | 32.45707158 |
| C17orf77:CCDS32721.1 | -2.058471483 | -0.469246842 | 32.42372706 |
| FAM153A:CCDS34305.1  | -2.491683706 | 1.223933873  | 32.41799263 |
| TAC4:CCDS45727.1     | -2.192168731 | 0.092816531  | 32.41367946 |
| ANKRD34C:CCDS53965.1 | -2.063027568 | 0.505296945  | 32.40628985 |
| KRT74:CCDS8832.1     | -1.874347762 | 1.77453245   | 32.38601208 |
| PTCRA:CCDS4874.1     | -2.050150363 | -0.176460165 | 32.37652907 |
| OPN5:CCDS4923.1      | -2.028484581 | 0.08086355   | 32.36956998 |
| IRAK3:CCDS44937.1    | -2.029163709 | 0.754347836  | 32.36791281 |
| FAM217A:CCDS4489.1   | -2.00711093  | 0.443229028  | 32.35493235 |
| UPK3B:CCDS5588.1     | -1.422104033 | 1.946847016  | 32.35392047 |
| TP63:CCDS46977.1     | -2.199703366 | 1.016863106  | 32.34538117 |
| USP26:CCDS14635.1    | -1.930164839 | 0.819275292  | 32.33596775 |
| SOHLH1:CCDS48054.1   | -2.009202535 | 0.366513927  | 32.33506679 |
| IL1R2:CCDS2054.1     | -1.961520239 | 0.461269381  | 32.32265939 |
| NCF2:CCDS1356.1      | -1.422169258 | 1.33116776   | 32.32191928 |
| CD8B:CCDS54376.1     | -2.136602461 | -0.39628242  | 32.29771262 |
| MOG:CCDS34368.1      | -1.628872359 | 0.479629381  | 32.29668795 |
| LOR:CCDS30870.1      | -2.123057616 | 0.015333332  | 32.27106047 |
| PON3:CCDS5639.1      | -1.974889634 | 0.627813945  | 32.26160755 |

## TAUvsControls

|                      |              |              |             |
|----------------------|--------------|--------------|-------------|
| TRIM64B:CCDS53693.1  | -1.966261896 | 0.519770362  | 32.24117871 |
| CCDC169:CCDS45028.1  | -2.227196855 | 4.046779454  | 32.23887059 |
| OPN4:CCDS7376.1      | -2.144792246 | 1.292392631  | 32.23715327 |
| ZP4:CCDS1615.1       | -2.203092216 | 1.267206213  | 32.21271633 |
| RTP1:CCDS3287.2      | -1.722380554 | 0.017914358  | 32.20933483 |
| HTR3E:CCDS3251.1     | -1.9762459   | 0.689859224  | 32.1979243  |
| NPTN:CCDS10249.1     | -1.0214528   | 6.085165712  | 32.17296853 |
| OR11A1:CCDS34363.1   | -2.152247738 | -0.545007112 | 32.16602697 |
| DCT:CCDS9470.1       | -1.564932638 | 2.636289555  | 32.15491693 |
| CD1E:CCDS41419.1     | -2.13880802  | 0.859304263  | 32.14498651 |
| KLK15:CCDS12805.1    | -2.111914255 | 0.172015561  | 32.14168252 |
| OAS2:CCDS41839.1     | -1.620371271 | 1.083015531  | 32.14150994 |
| CYP3A43:CCDS5677.1   | -2.006345184 | 1.315523236  | 32.12885728 |
| SH3TC2:CCDS4293.1    | -1.602034936 | 2.300910172  | 32.12161573 |
| ADAM21:CCDS9804.1    | -1.484904799 | 0.943725905  | 32.11942031 |
| UPP2:CCDS2207.1      | -2.048214108 | 0.142145091  | 32.11101859 |
| CD33:CCDS33084.1     | -2.002694764 | 0.477721397  | 32.09703059 |
| OR10A7:CCDS31815.1   | -2.225288877 | -0.555813058 | 32.08363963 |
| SLC36A2:CCDS4315.1   | -1.973226653 | 0.998725106  | 32.08093821 |
| KCNA7:CCDS12755.1    | -2.122191375 | 0.173604148  | 32.0790254  |
| PTGER3:CCDS656.1     | -1.37450657  | 1.000802625  | 32.07698179 |
| NPTN:CCDS10250.1     | -1.035057411 | 6.032930519  | 32.0437316  |
| TNFAIP6:CCDS2193.1   | -2.220672258 | 0.781987222  | 32.0433185  |
| PLVAP:CCDS32952.1    | -2.061995024 | 0.441103163  | 32.03538331 |
| PROKR2:CCDS13089.1   | -2.143332478 | 0.209554917  | 32.03379823 |
| USP9Y:CCDS14781.1    | -2.126534482 | 3.44511353   | 32.00135965 |
| ALB:CCDS3555.1       | -1.584679706 | 1.554799287  | 31.99037382 |
| AADAC:CCDS33877.1    | -1.951488727 | 0.677718414  | 31.98477388 |
| DDX4:CCDS54855.1     | -1.618071283 | 1.076686844  | 31.96989821 |
| HNF1A:CCDS9209.1     | -1.3240792   | 1.431405017  | 31.96541103 |
| COLEC11:CCDS1650.1   | -1.234456513 | 1.083963835  | 31.95557944 |
| CTSS:CCDS55634.1     | -1.800130909 | 0.603102101  | 31.95131154 |
| HCRTR2:CCDS4956.1    | -1.350354439 | 1.198410048  | 31.94752334 |
| DNAJB8:CCDS3048.1    | -2.158484662 | -0.403257373 | 31.94208556 |
| HTR1F:CCDS2920.1     | -2.000139802 | 0.094383868  | 31.93255523 |
| TXK:CCDS3480.1       | -1.938256907 | 0.707801532  | 31.92928904 |
| MYF5:CCDS9020.1      | -2.215824489 | -0.681566864 | 31.92447987 |
| GPR151:CCDS34266.1   | -1.70309431  | -0.05586469  | 31.88964215 |
| FAM3B:CCDS42930.1    | -2.216468015 | -0.141020147 | 31.88574383 |
| CIB4:CCDS33160.1     | -2.15090006  | -0.153964921 | 31.88329963 |
| MS4A7:CCDS7985.1     | -2.056035839 | 0.120725833  | 31.87924214 |
| C12orf40:CCDS41770.1 | -1.904365843 | 1.005761088  | 31.86015958 |
| BCAS1:CCDS13444.1    | -1.645234502 | 1.842551518  | 31.81561108 |
| GJB5:CCDS382.1       | -2.12918627  | -0.456468174 | 31.81549158 |
| SLC34A1:CCDS4418.1   | -1.419381497 | 1.196893373  | 31.81019825 |
| NPFFR2:CCDS3552.1    | -2.069997957 | 0.263786364  | 31.80576963 |
| CD86:CCDS3009.1      | -1.981895503 | 0.592994429  | 31.80561609 |
| AKR1D1:CCDS55169.1   | -2.060548624 | 0.155177296  | 31.80043597 |
| CCR3:CCDS54574.1     | -1.983115593 | 0.144243852  | 31.79629655 |
| LIPF:CCDS55719.1     | -2.029139674 | 0.199146869  | 31.78792241 |
| OR2M5:CCDS31105.1    | -2.082062692 | -0.324776912 | 31.78749905 |

## TAUvsControls

|                       |              |              |             |
|-----------------------|--------------|--------------|-------------|
| SPINK2:CCDS3508.1     | -2.120725448 | -0.509603182 | 31.78705345 |
| TNFSF11:CCDS9385.1    | -2.070289444 | -0.265663606 | 31.77698842 |
| KLK3:CCDS33083.1      | -2.055971017 | 0.228993558  | 31.76484206 |
| SLC6A14:CCDS14570.1   | -1.943092985 | 0.692914237  | 31.7626542  |
| TP63:CCDS46979.1      | -2.242289411 | 1.040635195  | 31.75710495 |
| GAGE12C:CCDS43943.1   | -2.339991147 | -0.204127665 | 31.73801747 |
| MCTP2:CCDS32338.1     | -1.580536724 | 1.672755256  | 31.73580375 |
| KRT80:CCDS41784.1     | -1.700825097 | 1.038437269  | 31.70907184 |
| PSG3:CCDS12611.1      | -2.167672644 | 0.490408333  | 31.70182449 |
| PSG11:CCDS12614.2     | -2.232338336 | 0.409201383  | 31.69224404 |
| KLF17:CCDS508.1       | -2.092430803 | 0.11094481   | 31.68827129 |
| SERPINB12:CCDS11984.1 | -2.047945024 | 0.424475344  | 31.67037783 |
| C3orf80:CCDS54667.1   | -1.53689494  | -0.155803172 | 31.66557491 |
| STAP1:CCDS3515.1      | -2.054931942 | 0.009706673  | 31.66384575 |
| MEPE:CCDS54776.1      | -2.031707501 | 0.207909404  | 31.66043526 |
| WISP3:CCDS5097.1      | -2.118071157 | 0.271833778  | 31.64393958 |
| KLK15:CCDS12806.1     | -2.141992883 | -0.331850237 | 31.63883899 |
| WDR66:CCDS53840.1     | -1.133183933 | 1.928240388  | 31.63769549 |
| GDF6:CCDS34926.1      | -1.598910277 | 0.940793878  | 31.63478587 |
| CYTIP:CCDS2204.1      | -2.2596825   | 0.699398557  | 31.62425364 |
| ACTRT1:CCDS14611.1    | -2.003064376 | 0.002710646  | 31.6176029  |
| SPACA1:CCDS5014.1     | -2.311305799 | 0.145922151  | 31.58769337 |
| STAB1:CCDS33768.1     | -1.299596093 | 3.050871608  | 31.58074576 |
| WISP3:CCDS5098.1      | -2.096083112 | 0.20608616   | 31.54393398 |
| KLK3:CCDS12807.1      | -2.049497483 | 0.084908972  | 31.53639533 |
| F5:CCDS1281.1         | -1.351695248 | 3.265608606  | 31.5231858  |
| NFE2L3:CCDS5396.1     | -1.054841584 | 1.802559074  | 31.52204955 |
| OR5L1:CCDS31509.1     | -2.159631095 | -0.502270933 | 31.50271823 |
| AADA3L3:CCDS41253.1   | -2.086813627 | -0.431197012 | 31.50009695 |
| WT1:CCDS55750.1       | -1.610529116 | 1.276260272  | 31.49309584 |
| CDCP1:CCDS46812.1     | -1.344883461 | 0.362667716  | 31.48311424 |
| VSTM2B:CCDS46034.1    | -1.394635834 | 1.419835339  | 31.47418423 |
| PTGER3:CCDS44160.1    | -1.337428798 | 0.839534202  | 31.4673871  |
| LDLRAD1:CCDS30725.1   | -2.188017486 | 0.092629658  | 31.46579791 |
| CPO:CCDS2372.1        | -2.089332056 | 0.280996147  | 31.43212592 |
| SLA:CCDS47923.1       | -2.328686605 | 2.76697899   | 31.42130766 |
| UGT2B11:CCDS3527.1    | -2.044342275 | 0.52355997   | 31.41826836 |
| IYD:CCDS5227.1        | -1.951162601 | 0.305119894  | 31.41792879 |
| GATA4:CCDS5983.1      | -2.011091727 | 0.595576443  | 31.41738781 |
| MCTP2:CCDS53975.1     | -1.559435329 | 1.575681457  | 31.405665   |
| MAGEA11:CCDS48180.1   | -1.977177831 | 0.294131278  | 31.39820186 |
| EFCAB9:CCDS54946.1    | -1.880170614 | -0.31352189  | 31.39670408 |
| CPN1:CCDS7486.1       | -1.942353396 | 0.720027054  | 31.38739569 |
| ISX:CCDS33640.1       | -2.116311091 | -0.216032066 | 31.38594235 |
| C1orf87:CCDS614.1     | -1.933630764 | 0.897147971  | 31.36375388 |
| NANOG:CCDS31736.1     | -2.032267474 | -0.113188212 | 31.3538995  |
| LY6G6F:CCDS34403.1    | -2.088162598 | 0.000868808  | 31.33974609 |
| SLA:CCDS47922.1       | -2.317174526 | 2.853454892  | 31.33625072 |
| PRAMEF20:CCDS41265.1  | -2.020545049 | 0.067875046  | 31.33161622 |
| CD300LD:CCDS42379.1   | -2.146222034 | -0.521324802 | 31.33023216 |
| RCVRN:CCDS11151.1     | -2.886643527 | 0.054245228  | 31.32712382 |

## TAUvsControls

|                      |              |              |             |
|----------------------|--------------|--------------|-------------|
| LOXL4:CCDS7473.1     | -2.119291441 | 3.863641897  | 31.32098832 |
| PTGER3:CCDS657.1     | -1.358321098 | 1.021089195  | 31.30571794 |
| DOK7:CCDS54717.1     | -1.46032167  | 0.587269025  | 31.29423945 |
| CD1E:CCDS53385.1     | -2.109146179 | 0.79162244   | 31.27412979 |
| RNASE9:CCDS53883.1   | -2.085985145 | 0.052231571  | 31.26284293 |
| CR1L:CCDS44310.1     | -2.0205706   | 0.869959698  | 31.25837455 |
| CASP1:CCDS8331.1     | -2.168072446 | 0.932908551  | 31.24652561 |
| EPSTI1:CCDS31964.1   | -1.266284098 | 0.985589406  | 31.21645936 |
| C17orf47:CCDS32691.1 | -2.038758235 | 0.669695321  | 31.21501477 |
| KLRK1:CCDS8623.1     | -1.557131685 | 0.343834471  | 31.20225612 |
| ANKAR:CCDS33351.2    | -1.312424942 | 2.244308527  | 31.18994014 |
| RNASE9:CCDS55904.1   | -2.075213057 | 0.013697791  | 31.17430473 |
| TECTB:CCDS7571.1     | -1.964342014 | 0.148705042  | 31.17195666 |
| THEG:CCDS12026.1     | -1.493909687 | 0.380721562  | 31.16964208 |
| ANXA10:CCDS34096.1   | -1.98561589  | 0.130851826  | 31.1598704  |
| GSG1:CCDS8659.2      | -1.230833872 | 1.799095988  | 31.12692429 |
| OR6C3:CCDS31819.1    | -2.081632944 | -0.464958476 | 31.12133048 |
| MMP7:CCDS8317.1      | -2.129070957 | -0.257743226 | 31.094278   |
| CHI3L2:CCDS41367.1   | -1.516357106 | 0.474979107  | 31.0871384  |
| ACPP:CCDS46916.1     | -2.066202514 | 0.741966722  | 31.07690462 |
| SPR:CCDS1920.1       | -1.387695762 | 0.911865413  | 31.05657257 |
| CLRN1:CCDS3153.1     | -2.013796554 | 0.409297373  | 31.05200967 |
| SOHLH1:CCDS35174.1   | -1.995522706 | 0.173869569  | 31.04311659 |
| ADAD1:CCDS34058.1    | -1.958316339 | 0.862123032  | 31.02997554 |
| SLC38A11:CCDS2224.1  | -2.217173792 | 0.446419132  | 31.02692932 |
| RASSF6:CCDS3558.1    | -1.986061361 | 0.617340713  | 31.0252779  |
| PRSS45:CCDS46815.1   | -2.152085571 | -0.712313522 | 31.0194419  |
| MS4A1:CCDS31570.1    | -2.009499384 | 0.142654449  | 31.01614332 |
| RBMY1D:CCDS35480.1   | -2.00602276  | 0.854543165  | 30.99949654 |
| OR4N4:CCDS32173.1    | -2.034669736 | 0.029674253  | 30.99453183 |
| LBP:CCDS13304.1      | -1.388826836 | 0.528025881  | 30.99328219 |
| FCRLA:CCDS30926.1    | -2.02654339  | 0.941907759  | 30.98890196 |
| ACPP:CCDS3073.1      | -2.078927261 | 0.67424742   | 30.98502599 |
| C11orf16:CCDS7794.1  | -2.029274951 | 0.141884368  | 30.97199312 |
| IL16:CCDS42069.1     | -1.489423611 | 2.340533192  | 30.9642897  |
| IL16:CCDS53966.1     | -1.489423611 | 2.340533192  | 30.9642897  |
| TM4SF19:CCDS56299.1  | -1.758307297 | 0.112131853  | 30.93104458 |
| FGF5:CCDS34021.1     | -1.680046884 | 0.106412149  | 30.92194374 |
| SLC45A2:CCDS43308.1  | -1.699665133 | 0.6081364    | 30.92017653 |
| TRIM29:CCDS8428.1    | -2.237590095 | 1.038620272  | 30.91792726 |
| CCDC39:CCDS46964.1   | -1.093098832 | 1.824938859  | 30.90623073 |
| MOGAT2:CCDS8240.1    | -2.017340415 | -0.044636115 | 30.89664459 |
| IL37:CCDS2106.1      | -2.015069154 | 0.091534365  | 30.87103689 |
| CTSG:CCDS9631.1      | -2.063176541 | -0.30080666  | 30.84473778 |
| IL1A:CCDS2101.1      | -2.014025552 | 0.187307857  | 30.84035404 |
| KIF4B:CCDS47324.1    | -1.194853221 | 1.532719733  | 30.82477963 |
| FAIM3:CCDS1473.1     | -1.938927333 | 0.731376317  | 30.82456298 |
| OR51S1:CCDS31362.1   | -1.99546383  | -0.059997284 | 30.80343557 |
| RNF128:CCDS14520.1   | -2.102981798 | 0.382061972  | 30.79874132 |
| LRRRC55:CCDS31539.1  | -1.202494488 | 2.342976926  | 30.78014353 |
| COL6A6:CCDS46911.1   | -1.715848907 | 2.901683503  | 30.77179069 |

## TAUvsControls

|                       |              |              |             |
|-----------------------|--------------|--------------|-------------|
| SLC23A3:CCDS46518.1   | -1.270323429 | 1.383323747  | 30.75155357 |
| CD1E:CCDS53386.1      | -2.108603061 | 0.743149288  | 30.73578485 |
| IYD:CCDS55067.1       | -1.924192654 | 0.853717829  | 30.73293166 |
| SLC34A1:CCDS54953.1   | -2.013233007 | 0.622483917  | 30.72883952 |
| FCN3:CCDS301.1        | -2.103702981 | 0.35614514   | 30.72575911 |
| TEKT5:CCDS10542.1     | -1.566321837 | 0.560341814  | 30.70452342 |
| GALNT6:CCDS8813.1     | -1.366846571 | 0.804604255  | 30.67756415 |
| KYNU:CCDS33299.1      | -1.947413577 | 0.644052455  | 30.66887248 |
| CCKBR:CCDS7761.1      | -1.85110096  | 1.968531488  | 30.66594032 |
| MRGPRX2:CCDS7847.1    | -2.080665361 | -0.11943077  | 30.65766305 |
| TRPM4:CCDS56098.1     | 1.139353442  | 5.986415045  | 30.64820184 |
| FOXR2:CCDS35308.1     | -2.075880179 | -0.512031417 | 30.64593674 |
| UGT3A1:CCDS3913.1     | -1.977638365 | 0.603214154  | 30.61772913 |
| EYS:CCDS47446.1       | -1.673350277 | 0.819639454  | 30.61453697 |
| RXFP4:CCDS1124.1      | -2.044829132 | -0.187608044 | 30.6110492  |
| SLA:CCDS6370.1        | -2.313381295 | 2.69707481   | 30.59930253 |
| KLK12:CCDS54298.1     | -2.136542465 | -0.749094069 | 30.58665276 |
| SSTR4:CCDS42856.1     | -1.98202132  | 0.578246766  | 30.58069998 |
| C14orf183:CCDS45101.1 | -2.06885042  | -0.031983526 | 30.58038716 |
| SLC5A11:CCDS10625.1   | -1.116103095 | 1.320119171  | 30.56898963 |
| MAGEA10:CCDS14705.1   | -1.97954524  | 0.243171251  | 30.56747406 |
| OR10W1:CCDS7968.1     | -2.09376608  | -0.423325057 | 30.54749825 |
| SLC26A7:CCDS6255.1    | -1.947888065 | 1.16456897   | 30.53530891 |
| MALL:CCDS2085.1       | -2.17853566  | -0.43842184  | 30.53071448 |
| ALS2CR12:CCDS2346.1   | -1.522484219 | 1.398164237  | 30.51656577 |
| TP63:CCDS46980.1      | -2.159406359 | 0.826325667  | 30.48678766 |
| CLNK:CCDS47024.1      | -1.947748232 | 0.944555482  | 30.48413526 |
| CTCF:CCDS13459.1      | -1.234577161 | 1.600644264  | 30.48332257 |
| PDCD1:CCDS33428.1     | -2.139540128 | -0.303349172 | 30.47953116 |
| KRT26:CCDS11374.1     | -1.970911323 | 0.559205269  | 30.47019896 |
| GADL1:CCDS2649.2      | -2.07238339  | 0.873536026  | 30.46417591 |
| TRPC7:CCDS47267.2     | -2.331556173 | 1.532982867  | 30.46192718 |
| SLC22A2:CCDS5276.1    | -2.094769955 | 1.060376659  | 30.44259074 |
| MPO:CCDS11604.1       | -1.447108751 | 1.281527919  | 30.426635   |
| NEXN:CCDS41351.1      | -2.424770632 | 2.327255271  | 30.41667332 |
| PTGER3:CCDS658.1      | -1.35388618  | 0.813003774  | 30.39014418 |
| ANKS4B:CCDS42130.1    | -1.986834492 | 0.18564944   | 30.38356363 |
| FAM170A:CCDS54889.1   | -2.10927143  | 0.142651369  | 30.36609276 |
| OR8S1:CCDS31789.1     | -1.963766829 | -0.017124546 | 30.36524354 |
| PAX1:CCDS13146.2      | -1.867520648 | 0.833144065  | 30.36152362 |
| GPR148:CCDS2163.1     | -1.996429729 | -0.365757045 | 30.34366338 |
| TNFRSF11A:CCDS11980.1 | -1.319269965 | 1.128353413  | 30.33232378 |
| CD33:CCDS54299.1      | -1.972788055 | 0.428535342  | 30.32675929 |
| MCHR2:CCDS5044.1      | -2.019000507 | -0.007126636 | 30.31867851 |
| TMPRSS11B:CCDS3521.1  | -1.990928321 | 0.448887344  | 30.30434853 |
| CFHR5:CCDS1387.1      | -1.960330386 | 0.7571049    | 30.30157263 |
| KRT16:CCDS11401.1     | -1.47803161  | 0.970361916  | 30.29843657 |
| VNN2:CCDS56451.1      | -2.102137101 | -0.071152697 | 30.29166732 |
| AQP10:CCDS1065.1      | -2.067840352 | -0.051202538 | 30.28162369 |
| SLC23A3:CCDS46517.1   | -1.261657782 | 1.414743321  | 30.27759257 |
| CYP1A2:CCDS32293.1    | -1.475919696 | 0.537843972  | 30.27359716 |

## TAUvsControls

|                      |              |              |             |
|----------------------|--------------|--------------|-------------|
| FAM71D:CCDS9778.1    | -1.93983953  | 0.529263844  | 30.26578877 |
| OR8B8:CCDS8446.1     | -2.066953457 | -0.356484316 | 30.2611789  |
| OR6P1:CCDS53391.1    | -2.043142815 | -0.359635456 | 30.23147618 |
| MKX:CCDS7156.1       | -1.898665405 | 2.251158434  | 30.2265674  |
| MS4A15:CCDS44617.1   | -2.012154054 | -0.178747443 | 30.21544851 |
| WDR66:CCDS41853.1    | -1.057568589 | 2.1168632    | 30.2129863  |
| SPAM1:CCDS5790.1     | -1.97512284  | 0.164508565  | 30.20949863 |
| FCRLA:CCDS53415.1    | -2.03771406  | 1.17240316   | 30.18299224 |
| SPATC1:CCDS6413.2    | -2.115342597 | 1.120306856  | 30.1710101  |
| PRAMEF21:CCDS41260.1 | -1.968658037 | 0.194233395  | 30.16460352 |
| NR0B1:CCDS14223.1    | -1.563289107 | 0.507157318  | 30.15578629 |
| OR1J4:CCDS35122.1    | -2.059014615 | -0.475717485 | 30.15446032 |
| DCAF4L2:CCDS6245.1   | -2.033482292 | -0.166044936 | 30.15427321 |
| SLC9B1:CCDS34041.1   | -1.609878606 | 0.982623302  | 30.14395398 |
| TEX33:CCDS54524.1    | -2.004661565 | 0.042987738  | 30.13266263 |
| CT47A1:CCDS35391.1   | -2.000955362 | -0.199374893 | 30.13040073 |
| CDY2B:CCDS35473.1    | -1.998532974 | 0.232732359  | 30.12409742 |
| OR4C12:CCDS31496.1   | -2.122936485 | -0.467017797 | 30.12347209 |
| SERPINE3:CCDS53870.1 | -1.925623047 | 0.88863767   | 30.10893162 |
| ADAD1:CCDS54800.1    | -1.941045493 | 0.823940133  | 30.10045765 |
| TNNI2:CCDS53594.1    | -3.14583192  | 2.348669054  | 30.09520942 |
| CD180:CCDS3992.1     | -1.906638869 | 0.521748811  | 30.0799257  |
| TAC4:CCDS42359.1     | -2.081152075 | -0.301366134 | 30.06170012 |
| CHRM2:CCDS5843.1     | -1.597461286 | 0.511794662  | 30.06023416 |
| PAH:CCDS9092.1       | -1.93910061  | 0.772156447  | 30.05689649 |
| OR1E2:CCDS11026.1    | -2.078407486 | -0.472071882 | 30.0560205  |
| ILDR1:CCDS56271.1    | -2.093490772 | 0.836384687  | 30.05365171 |
| TMC1:CCDS6643.1      | -1.192690424 | 1.524965318  | 30.02691202 |
| QRFPR:CCDS3719.1     | -1.40543611  | 0.825779084  | 30.02598701 |
| GRAP2:CCDS13999.1    | -2.086073389 | 0.368576638  | 30.0045234  |
| DOK2:CCDS6016.1      | -1.452710419 | 0.261265335  | 29.9893993  |
| RHO:CCDS3063.1       | -2.080526305 | -0.043007488 | 29.98551822 |
| DIO2:CCDS55934.1     | -2.037814803 | 0.206482117  | 29.97998288 |
| CASP10:CCDS56160.1   | -2.003576651 | 0.688203414  | 29.97482649 |
| CASP10:CCDS2339.1    | -2.032123925 | 0.821166228  | 29.97162055 |
| ANXA13:CCDS34939.1   | -1.940377811 | 0.759160063  | 29.96577221 |
| WNT8B:CCDS7494.1     | -1.265440788 | 2.283407925  | 29.94228932 |
| CIDEC:CCDS56239.1    | -2.226365647 | 0.513072086  | 29.94206657 |
| BOLL:CCDS2325.1      | -1.990148529 | 0.338393452  | 29.94077128 |
| RASSF6:CCDS3559.1    | -1.982657069 | 0.451499198  | 29.93528647 |
| TRIM60:CCDS3808.1    | -2.010176034 | 0.353333008  | 29.93147136 |
| DOCK2:CCDS4371.1     | -1.069652976 | 2.700383168  | 29.92548309 |
| TAL1:CCDS547.1       | -1.541367666 | 0.1882121    | 29.92305491 |
| TRPM4:CCDS33073.1    | 1.121185024  | 6.063674122  | 29.91689816 |
| IL31:CCDS31919.1     | -2.140019064 | -0.640245302 | 29.9148026  |
| FAM9C:CCDS35203.1    | -2.12635097  | -0.607596583 | 29.8991798  |
| ALDH1A3:CCDS10389.1  | -2.084007077 | 4.640471494  | 29.89878531 |
| OR10H1:CCDS12335.1   | -2.006913705 | -0.278960973 | 29.88106311 |
| VWF:CCDS8539.1       | -1.223005335 | 3.439632258  | 29.87301898 |
| PRSS37:CCDS34764.1   | -2.066250322 | -0.435197403 | 29.85743344 |
| ZCCHC5:CCDS14440.1   | -1.944513816 | -0.023602404 | 29.85636697 |

## TAUvsControls

|                      |              |              |             |
|----------------------|--------------|--------------|-------------|
| KCNJ10:CCDS1193.1    | -2.168030969 | 1.027370556  | 29.85452363 |
| OASL:CCDS9212.1      | -2.061112933 | -0.034932266 | 29.85056822 |
| TNNI2:CCDS31333.1    | -3.114459682 | 2.336599369  | 29.84933506 |
| KIF25:CCDS5305.1     | -1.952927905 | 0.368571863  | 29.84233294 |
| CCR9:CCDS2732.1      | -2.011378131 | 0.341087881  | 29.83585874 |
| CLDN7:CCDS11096.1    | -2.372766366 | -0.312909513 | 29.83037376 |
| A4GNT:CCDS3097.1     | -1.981290313 | -0.324633159 | 29.82724137 |
| GDF2:CCDS7219.1      | -1.963357767 | 0.382543141  | 29.81700647 |
| CCDC87:CCDS8145.1    | -1.339698022 | 1.265237066  | 29.78044099 |
| VGLL1:CCDS14658.1    | -2.108414855 | -0.438549958 | 29.77640582 |
| CXorf48:CCDS35400.1  | -1.974235084 | -0.167049698 | 29.77039549 |
| TRHDE:CCDS9004.1     | -1.448772853 | 2.342591638  | 29.75451863 |
| OVGP1:CCDS834.1      | -1.267111201 | 1.90185161   | 29.74589763 |
| SLC26A7:CCDS6254.1   | -1.932967877 | 1.138141292  | 29.74030021 |
| TMEM30B:CCDS32093.1  | -2.091506979 | 0.033491082  | 29.73756353 |
| GZMA:CCDS3965.1      | -2.019277668 | -0.284430587 | 29.72717492 |
| PSG8:CCDS33037.1     | -2.21963939  | 0.63991008   | 29.71893088 |
| ZAR1L:CCDS45023.1    | -2.063339006 | -0.303003111 | 29.71417625 |
| KCNS1:CCDS13342.1    | -1.9359725   | 0.769955419  | 29.70783311 |
| SPINK5:CCDS47301.1   | -0.992943581 | 2.083629731  | 29.69399138 |
| ALS2CR12:CCDS46488.1 | -1.503960444 | 1.370669476  | 29.68220647 |
| LRRC72:CCDS56464.1   | -1.99892692  | 0.231181522  | 29.66186058 |
| AKR1D1:CCDS55170.1   | -2.028467597 | 0.155599898  | 29.65781534 |
| TNFSF14:CCDS12171.1  | -2.01372684  | -0.366244217 | 29.64800909 |
| CCKAR:CCDS3438.1     | -2.01482797  | 0.390258696  | 29.64732118 |
| EIF2S3:CCDS14210.1   | 1.108076243  | 6.151924226  | 29.61959504 |
| SHE:CCDS30877.1      | -1.952679576 | 0.624207783  | 29.6058465  |
| OR52A1:CCDS31374.1   | -2.080898496 | -0.546721199 | 29.59246691 |
| GABRP:CCDS4375.1     | -1.980098356 | 0.370410528  | 29.57528554 |
| CANX:CCDS4447.1      | 0.929951834  | 8.532257648  | 29.56309246 |
| ACER1:CCDS12161.1    | -1.685253456 | -0.06594074  | 29.55865056 |
| ACVR1C:CCDS46434.1   | -2.073235339 | 0.501143739  | 29.55370837 |
| PXDNL:CCDS47855.1    | -1.090057416 | 2.1496976    | 29.54921313 |
| KIAA1614:CCDS41442.1 | -1.133683111 | 2.175902045  | 29.54794157 |
| LY6E:CCDS6394.1      | 1.970900706  | 5.129686329  | 29.5380871  |
| SPAM1:CCDS5791.1     | -1.958830004 | 0.145315905  | 29.53530271 |
| TBC1D29:CCDS32606.1  | -2.009523225 | -0.314325932 | 29.52860214 |
| TMEM72:CCDS41504.1   | -1.380989872 | 0.532010998  | 29.5211271  |
| CD86:CCDS43138.1     | -1.934204018 | 0.520227947  | 29.50910581 |
| ADAMDEC1:CCDS55212.1 | -2.06399939  | 0.869262172  | 29.48278492 |
| CSF3R:CCDS414.1      | -1.176184031 | 1.468392378  | 29.46999574 |
| LCN1:CCDS6991.1      | -2.061140031 | -0.270530946 | 29.46216962 |
| WT1:CCDS55751.1      | -1.661353045 | 1.374242612  | 29.4586334  |
| CRYBA1:CCDS11249.1   | -3.16402372  | 6.362083178  | 29.45518033 |
| CSF3:CCDS11357.1     | -1.986234304 | 0.003543755  | 29.45292275 |
| IL23R:CCDS637.1      | -1.966749191 | 0.700459144  | 29.4502803  |
| LILRA4:CCDS12890.1   | -1.956937863 | 0.576868263  | 29.44842554 |
| FCGR3B:CCDS41433.1   | -2.000072422 | 0.797779512  | 29.44181705 |
| F9:CCDS14666.1       | -1.960617304 | 0.926541573  | 29.42006997 |
| STK17A:CCDS5470.1    | -1.111546772 | 2.791150289  | 29.41361733 |
| PNLIPRP1:CCDS7595.1  | -1.988429821 | 1.125580622  | 29.41334204 |



## TAUvsControls

|                       |              |              |             |
|-----------------------|--------------|--------------|-------------|
| CD1E:CCDS53384.1      | -2.109481315 | 0.594561496  | 29.41078133 |
| ACVR1C:CCDS46433.1    | -2.003728378 | 0.434606961  | 29.40199593 |
| RAB19:CCDS34762.2     | -2.037427539 | -0.595464101 | 29.39518209 |
| TRPC7:CCDS54906.1     | -2.310024674 | 1.38775403   | 29.39416152 |
| KMO:CCDS1618.1        | -1.621121032 | 1.101514128  | 29.39283355 |
| OR10K1:CCDS30897.1    | -2.007396241 | -0.416694039 | 29.39175539 |
| ASB10:CCDS47750.2     | -1.972771801 | 0.423122722  | 29.38758377 |
| GHSR:CCDS3218.1       | -2.010217226 | 0.106435096  | 29.38267323 |
| IL18:CCDS44731.1      | -2.186188267 | -0.303036029 | 29.37494337 |
| SLC17A1:CCDS4565.1    | -1.902544301 | 0.43954804   | 29.37175684 |
| ATP4B:CCDS9539.1      | -1.959222095 | -0.069430312 | 29.37093553 |
| NEXN:CCDS53335.1      | -2.38541221  | 2.243751274  | 29.35923203 |
| OR2F1:CCDS5887.1      | -1.973927859 | -0.353499844 | 29.35381163 |
| GBP3:CCDS717.2        | -1.254829782 | 1.415817111  | 29.352775   |
| CIDEA:CCDS11856.1     | -1.973704761 | -0.183977854 | 29.35260703 |
| OC90:CCDS47919.1      | -1.890621762 | 1.041289018  | 29.33473001 |
| PLAC1:CCDS14642.1     | -2.15994139  | -0.389002495 | 29.33267697 |
| CD244:CCDS53398.1     | -2.046951975 | 0.360891628  | 29.32778408 |
| CLRN1:CCDS56285.1     | -2.017274946 | 0.625729795  | 29.32752754 |
| EYS:CCDS4967.1        | -1.596037877 | 0.708059309  | 29.32689757 |
| CSF2RA:CCDS55361.1    | -1.262772434 | 1.781621654  | 29.32174614 |
| TECRL:CCDS33990.1     | -1.971254475 | 0.349412939  | 29.31661044 |
| CPLX4:CCDS11973.1     | -2.240236152 | -0.083493351 | 29.30690726 |
| GPR119:CCDS14625.1    | -1.98342421  | -0.237847036 | 29.29967024 |
| KIR2DL4:CCDS42619.1   | -1.945643661 | 0.953254287  | 29.28580892 |
| PIK3R5:CCDS11147.1    | -1.191681855 | 2.230660451  | 29.28389308 |
| VDR:CCDS8757.1        | -1.369121837 | 1.176877051  | 29.28088061 |
| PSG8:CCDS46091.1      | -2.197565467 | 0.644310636  | 29.24928836 |
| SP100:CCDS42832.1     | -1.726577571 | 2.835795657  | 29.22988738 |
| ILDR1:CCDS3008.1      | -2.077233934 | 0.677876633  | 29.22167623 |
| TBXA2R:CCDS42467.1    | -1.652768384 | 0.012390998  | 29.21345932 |
| SP100:CCDS56171.1     | -1.647888765 | 2.372681922  | 29.20829666 |
| C1orf127:CCDS53267.1  | -1.590375364 | 1.497378908  | 29.20573889 |
| PRR15:CCDS5421.1      | -2.225010717 | -0.635109756 | 29.19734248 |
| SLC16A12:CCDS7404.2   | -1.655599352 | 0.502845451  | 29.19644769 |
| CYP24A1:CCDS33491.1   | -1.976069692 | 0.667285091  | 29.19595212 |
| CSF2RA:CCDS35192.1    | -1.141618656 | 1.954638702  | 29.18820041 |
| KCNJ1:CCDS8476.1      | -2.006307987 | 0.06672886   | 29.17596209 |
| KRTAP10-9:CCDS42961.1 | -1.973962122 | -0.416324847 | 29.16589201 |
| KIAA1199:CCDS10315.1  | -1.777308716 | 5.62197335   | 29.15910844 |
| NINJ2:CCDS8505.1      | -2.194825272 | -0.253794542 | 29.140403   |
| RAD21L1:CCDS46568.1   | -1.920361446 | 1.08247716   | 29.13347859 |
| EHF:CCDS55752.1       | -1.887981186 | 0.744622385  | 29.12651362 |
| BOLL:CCDS2324.1       | -1.960813334 | 0.452542216  | 29.12134269 |
| SH3RF2:CCDS4280.1     | -1.380762883 | 1.43459493   | 29.11617497 |
| ADAD1:CCDS54801.1     | -1.919758343 | 0.775175449  | 29.10573724 |
| MAS1:CCDS5272.1       | -2.085064582 | -0.410813569 | 29.09352799 |
| TAS2R10:CCDS8634.1    | -1.956837938 | -0.309532219 | 29.09260413 |
| TRPA1:CCDS34908.1     | -2.548273168 | 2.704148872  | 29.08909071 |
| EPST11:CCDS9387.1     | -1.256952168 | 0.73788342   | 29.08724663 |
| DYDC1:CCDS7366.1      | -2.131055865 | -0.448024037 | 29.07507651 |

## TAUvsControls

|                      |              |              |             |
|----------------------|--------------|--------------|-------------|
| HPGDS:CCDS3640.1     | -2.078684547 | -0.556664823 | 29.06234104 |
| AWAT1:CCDS35321.1    | -2.197735206 | -0.081807879 | 29.0614623  |
| GATA6:CCDS11872.1    | -1.702566484 | 2.056198865  | 29.04409282 |
| SERPINB5:CCDS32839.1 | -1.976030575 | 0.081392008  | 29.03916616 |
| MPPED2:CCDS44560.1   | -1.220147228 | 3.771624017  | 29.0309646  |
| GOT1L1:CCDS47839.1   | -1.91507871  | 0.472430446  | 29.02444118 |
| FAIM3:CCDS44304.1    | -1.923607942 | 0.446586178  | 29.0188974  |
| PYHIN1:CCDS1178.1    | -1.899679753 | 0.794678991  | 29.0164796  |
| SLC25A45:CCDS41671.1 | -1.584243177 | -0.035628359 | 29.01551012 |
| NEUROD2:CCDS11338.1  | -2.51992641  | 4.01714008   | 29.00613399 |
| TREM2:CCDS4852.1     | -1.976430949 | -0.182725274 | 28.99642091 |
| TRIM54:CCDS1746.2    | -2.872872084 | 0.465678537  | 28.99356649 |
| APBB1IP:CCDS31167.1  | -1.97784698  | 1.604066122  | 28.99260764 |
| CTSS:CCDS968.1       | -1.786478228 | 0.81347489   | 28.98018553 |
| CST9L:CCDS13157.1    | -2.108367663 | -0.710409422 | 28.96849861 |
| NAT1:CCDS55205.1     | -1.427947508 | 0.689292985  | 28.96647252 |
| CLDN18:CCDS33862.1   | -2.094976944 | -0.181454165 | 28.96594482 |
| PLEKHN1:CCDS4.1      | -1.30297436  | 1.276186383  | 28.96210275 |
| CABS1:CCDS3539.1     | -1.965796055 | -0.106508763 | 28.95842188 |
| TLR10:CCDS3445.1     | -1.501410004 | 0.871178969  | 28.95721881 |
| TCEB3C:CCDS11931.1   | -1.880781008 | 1.012408488  | 28.94688478 |
| OR1E1:CCDS11024.1    | -2.001069112 | -0.508154295 | 28.94240477 |
| OR6N1:CCDS30905.1    | -1.979208027 | -0.371768293 | 28.9389448  |
| TCEB3CL:CCDS42433.1  | -1.911256251 | 1.004752297  | 28.93744937 |
| AQP2:CCDS8792.1      | -1.945797133 | -0.06586055  | 28.92481637 |
| EPO:CCDS5705.1       | -2.110605483 | -0.42245822  | 28.92152306 |
| TPRX1:CCDS33066.1    | -2.125024626 | -0.244335269 | 28.89362294 |
| CRYAA:CCDS13695.1    | -3.595670743 | 7.167110952  | 28.88222159 |
| CRNN:CCDS1010.1      | -1.914008577 | 0.366807281  | 28.87913357 |
| TBPL2:CCDS9724.1     | -1.939120809 | 0.305963244  | 28.86362319 |
| ENPEP:CCDS3691.1     | -1.058882623 | 1.658015439  | 28.86050239 |
| OR8I2:CCDS31517.1    | -2.046472729 | -0.46276426  | 28.85746811 |
| UGT2B17:CCDS3523.1   | -1.921038888 | 0.262519955  | 28.85418046 |
| DYTN:CCDS46502.1     | -2.066536758 | 0.9663088    | 28.84981788 |
| PPP1R3A:CCDS5759.1   | -1.957128585 | 1.329077398  | 28.84011965 |
| CSF3:CCDS42314.1     | -1.96803075  | -0.077649418 | 28.8327064  |
| OR4K14:CCDS32027.1   | -2.003060439 | -0.404273145 | 28.82778597 |
| ADAMDEC1:CCDS6044.1  | -2.090966886 | 1.200282612  | 28.81464975 |
| ACSM2A:CCDS32401.1   | -1.815976372 | 1.236623659  | 28.81350679 |
| SCARA5:CCDS6064.1    | -2.17097209  | 0.884285992  | 28.8005634  |
| OR9Q1:CCDS31543.1    | -2.001929891 | 0.022044067  | 28.79728423 |
| IL1RAPL2:CCDS14517.1 | -1.473141438 | 1.016234217  | 28.79371477 |
| NIPAL4:CCDS47328.1   | -1.453591446 | 1.111010915  | 28.79067395 |
| AKR1B10:CCDS5832.1   | -1.465297099 | 0.367528188  | 28.7890408  |
| RAG2:CCDS7903.1      | -1.95968989  | 0.298153402  | 28.78814412 |
| KCNK18:CCDS7598.1    | -1.968503594 | -0.031252731 | 28.78795047 |
| MMP27:CCDS8319.1     | -1.921038262 | 0.416267186  | 28.78471069 |
| MUC7:CCDS3541.1      | -2.044502864 | 0.281773471  | 28.77936931 |
| APOF:CCDS44923.1     | -1.958179658 | -0.418027356 | 28.76649899 |
| BDKRB1:CCDS9943.1    | -1.729220308 | 1.132986815  | 28.76589002 |
| UGT1A9:CCDS2505.1    | -1.322784439 | 0.788928691  | 28.76325586 |

## TAUvsControls

|                       |              |              |             |
|-----------------------|--------------|--------------|-------------|
| OR52E8:CCDS31400.1    | -2.102275516 | -0.51583093  | 28.76157109 |
| CHP2:CCDS10617.1      | -2.109843283 | -0.46822141  | 28.75327253 |
| SPP1:CCDS43250.1      | -1.683456771 | 4.256277433  | 28.74886129 |
| LAIR1:CCDS12891.1     | -2.021525609 | 0.842920234  | 28.74218413 |
| EXD1:CCDS10072.1      | -1.924448367 | 0.432233578  | 28.73796773 |
| HTR3D:CCDS3249.1      | -1.971394916 | 0.048028055  | 28.71112793 |
| CDY2A:CCDS14789.1     | -1.945262391 | 0.249875463  | 28.70218798 |
| CHI3L2:CCDS30803.1    | -1.539325892 | 0.834353437  | 28.69747317 |
| PYHIN1:CCDS30907.1    | -1.873580353 | 0.754430191  | 28.67951003 |
| LRRIQ4:CCDS46951.1    | -1.885017517 | 0.467189032  | 28.6678468  |
| PRSS50:CCDS2745.1     | -1.947507856 | 0.09353327   | 28.65632782 |
| ACOX2:CCDS33775.1     | -1.497470281 | 2.498606066  | 28.65009268 |
| LDHAL6A:CCDS7841.1    | -2.011394024 | 0.037328901  | 28.64594854 |
| PTGER4:CCDS3930.1     | -1.934704075 | 0.673120833  | 28.64100403 |
| TNFSF10:CCDS54680.1   | -2.126406811 | -0.687207683 | 28.63705728 |
| TMPRSS11F:CCDS3520.1  | -1.945632321 | 0.568815028  | 28.62644087 |
| CSH1:CCDS11649.1      | -2.00227102  | -0.136013022 | 28.61818222 |
| SPAG11B:CCDS5966.1    | -2.117131662 | -0.703511655 | 28.60220177 |
| C19orf35:CCDS12087.1  | -1.360105133 | 0.299143494  | 28.59385831 |
| LILRA5:CCDS12888.1    | -1.987028624 | 0.158917698  | 28.59120005 |
| OR10H3:CCDS12334.1    | -2.050834423 | -0.282532628 | 28.5900088  |
| CYP2C9:CCDS7437.1     | -1.901857656 | 0.419620319  | 28.58191849 |
| OR3A1:CCDS11023.1     | -2.060178363 | -0.491474457 | 28.57826594 |
| ASB10:CCDS5921.2      | -1.988478708 | 0.25318261   | 28.56446422 |
| AQP8:CCDS10626.1      | -1.536411811 | 0.122659372  | 28.56309423 |
| SLC14A2:CCDS11924.1   | -1.210293323 | 1.594084075  | 28.55695109 |
| C17orf104:CCDS45703.2 | -1.402738987 | 1.359576536  | 28.54303826 |
| FAM187B:CCDS12448.1   | -1.990403569 | -0.401037577 | 28.53668268 |
| ACSM2B:CCDS10586.1    | -1.812042488 | 1.186292397  | 28.53487876 |
| CYP8B1:CCDS2707.1     | -1.956452614 | 0.381772109  | 28.51837008 |
| SLC26A3:CCDS5748.1    | -1.35015676  | 1.427667425  | 28.50371035 |
| CRH:CCDS6188.1        | -2.403435479 | 1.596280114  | 28.48766322 |
| OR10G8:CCDS31704.1    | -2.04052272  | 0.003806779  | 28.48357135 |
| DEFB119:CCDS33455.1   | -2.295298874 | -0.838424    | 28.47219084 |
| KDM5D:CCDS14794.1     | -2.241335134 | 3.455189657  | 28.4690941  |
| TBC1D21:CCDS10252.1   | -1.29422721  | 0.722928763  | 28.46858974 |
| PRAMEF18:CCDS41258.1  | -1.913401103 | 0.248718021  | 28.45205639 |
| TREX2:CCDS35437.1     | -2.147816922 | -0.766505689 | 28.45049461 |
| UGT2B15:CCDS3524.1    | -1.916728651 | 0.167115829  | 28.44712246 |
| PRAMEF22:CCDS41256.1  | -1.906480726 | 0.178336503  | 28.44399131 |
| PRLR:CCDS3909.1       | -1.252742293 | 1.391634683  | 28.44110155 |
| PYHIN1:CCDS1179.1     | -1.888699623 | 0.77258954   | 28.43356551 |
| KLHL6:CCDS3245.2      | -1.373166723 | 0.736677792  | 28.42549482 |
| CD1B:CCDS1176.1       | -2.055576455 | -0.015061135 | 28.42404227 |
| FAIM3:CCDS53467.1     | -1.903439142 | 0.463329914  | 28.41520723 |
| BMX:CCDS14168.1       | -1.950247947 | 1.53145896   | 28.38875044 |
| CDY1B:CCDS35486.1     | -1.920629455 | 0.298424708  | 28.38583627 |
| KLHL33:CCDS53882.1    | -1.895733705 | 0.512575264  | 28.38546004 |
| HFE2:CCDS911.1        | -2.18228569  | 0.126283032  | 28.38034286 |
| ZPBP2:CCDS11352.1     | -2.056735104 | 0.01226226   | 28.3798941  |
| GK2:CCDS3585.1        | -1.948120874 | 0.089919047  | 28.37817638 |

## TAUvsControls

|                       |              |              |             |
|-----------------------|--------------|--------------|-------------|
| IL12RB2:CCDS638.1     | -1.148594454 | 1.589474113  | 28.37110603 |
| TBX22:CCDS43975.1     | -1.901841151 | 0.172133852  | 28.35968025 |
| INSM2:CCDS9657.1      | -1.676395303 | 1.127790935  | 28.34888363 |
| CHMP4C:CCDS6233.1     | -1.664584075 | 0.07433075   | 28.34715953 |
| ARHGEF35:CCDS34770.1  | -1.464052012 | 0.666575079  | 28.34158061 |
| PTER:CCDS7111.1       | -2.005346783 | 0.478505376  | 28.33461286 |
| MRGPRD:CCDS31625.1    | -1.494136436 | -0.248131554 | 28.33366364 |
| CSF3R:CCDS413.1       | -1.162973516 | 1.422486812  | 28.3313312  |
| IL37:CCDS2104.1       | -1.985257658 | 0.179038432  | 28.32879748 |
| RHOV:CCDS10068.1      | -1.586469522 | 0.437610467  | 28.32143859 |
| PCDH12:CCDS4269.1     | -1.002605033 | 1.784536099  | 28.30646325 |
| HTR3C:CCDS3250.1      | -1.911699447 | 0.59518423   | 28.30431336 |
| OR2M3:CCDS31107.1     | -1.961375657 | -0.249467612 | 28.30392435 |
| TNF:CCDS4702.1        | -1.993042414 | -0.314832876 | 28.28845505 |
| LIPN:CCDS44456.1      | -1.905664517 | 0.301001873  | 28.28840179 |
| AQP7:CCDS6541.1       | -2.081655248 | 0.527862177  | 28.26459652 |
| SP100:CCDS56170.1     | -1.701204965 | 2.643925457  | 28.25839645 |
| SLAMF9:CCDS1191.1     | -1.885328036 | 0.463589608  | 28.25296032 |
| BCO2:CCDS8358.2       | -1.267682285 | 1.822555773  | 28.25165233 |
| POM121L12:CCDS43584.1 | -2.048726452 | -0.547446655 | 28.24935059 |
| C4orf17:CCDS3649.1    | -1.888863595 | 0.611769387  | 28.24000165 |
| BTNL3:CCDS47358.1     | -1.904472392 | 0.454845904  | 28.23759351 |
| CTAG1B:CCDS14758.1    | -1.613585155 | -0.633105739 | 28.22866212 |
| CD84:CCDS1206.1       | -1.999159731 | 0.448708481  | 28.21990444 |
| EHF:CCDS7894.1        | -1.886886202 | 0.507144159  | 28.21109634 |
| OR13A1:CCDS31188.1    | -2.027372263 | -0.315895475 | 28.20423057 |
| SERPINA4:CCDS9927.1   | -1.986098116 | -0.165437102 | 28.18531607 |
| PRAMEF8:CCDS30597.1   | -1.947979046 | 0.22182247   | 28.17035051 |
| ITIH1:CCDS54595.1     | -1.170060728 | 1.443976018  | 28.15734137 |
| PYHIN1:CCDS30908.1    | -1.86260851  | 0.731686905  | 28.14979772 |
| VSIG1:CCDS55474.1     | -1.362303884 | 0.622451301  | 28.14795663 |
| C3orf52:CCDS46887.1   | -1.484733054 | 0.335411951  | 28.14400664 |
| CD226:CCDS11997.1     | -1.895880704 | 0.42787365   | 28.12177843 |
| PKDREJ:CCDS14073.1    | -1.185262465 | 2.233652782  | 28.10348718 |
| KDM5D:CCDS55554.1     | -2.22468762  | 3.405859757  | 28.07839236 |
| OR1M1:CCDS32896.1     | -1.975532994 | -0.380662482 | 28.0629103  |
| F2:CCDS31476.1        | -1.438950823 | 0.914782631  | 28.05802662 |
| OR6C4:CCDS31827.1     | -2.055279256 | -0.613322414 | 28.05172308 |
| HOXD11:CCDS2265.1     | -2.255349233 | 0.174539001  | 28.04939061 |
| ASB15:CCDS34742.1     | -1.889837667 | 0.694338692  | 28.04898274 |
| SERPINA9:CCDS41982.1  | -1.918521612 | 0.238805023  | 28.03151346 |
| CES5A:CCDS54012.1     | -1.4043792   | 1.237813012  | 28.01274083 |
| FAAH2:CCDS14375.1     | -1.12233482  | 1.117227991  | 28.01267723 |
| ACPT:CCDS12802.1      | -1.111527073 | 1.020288826  | 28.01047248 |
| LILRA3:CCDS54317.1    | -1.918183656 | 0.24558786   | 28.00908421 |
| C17orf99:CCDS54171.1  | -1.959466521 | -0.272737709 | 28.00641398 |
| TMPRSS11E:CCDS33993.1 | -1.899585861 | 0.325976077  | 28.00043512 |
| C12orf56:CCDS44935.1  | -1.83064156  | 0.89648095   | 27.954025   |
| CALHM1:CCDS7550.1     | -1.935479266 | -0.191178917 | 27.95169819 |
| SERPINA10:CCDS9923.1  | -1.876380038 | 0.272989695  | 27.9361454  |
| ADORA3:CCDS838.1      | -1.576897837 | 0.271165163  | 27.93558465 |

## TAUvsControls

|                      |              |              |             |
|----------------------|--------------|--------------|-------------|
| G6PC:CCDS11446.1     | -1.987957342 | 0.08339022   | 27.929604   |
| LILRA5:CCDS12889.1   | -1.928467922 | 0.013436233  | 27.92391576 |
| CETN1:CCDS11820.1    | -2.038151953 | -0.704472678 | 27.92146757 |
| CSF2RA:CCDS35190.1   | -1.233692704 | 2.02629573   | 27.91831372 |
| SIRPB2:CCDS46570.1   | -1.974339462 | 0.132169539  | 27.90481241 |
| IGFL3:CCDS33058.1    | -2.115393753 | -0.696507037 | 27.89623125 |
| KCNJ1:CCDS8477.1     | -2.021379915 | -0.210553499 | 27.89336656 |
| OPTC:CCDS1439.1      | -2.371105293 | 1.049447208  | 27.89239105 |
| NKAPL:CCDS34353.1    | -1.978656541 | 0.142525873  | 27.88436474 |
| CD33:CCDS46157.1     | -1.970270354 | 0.058819463  | 27.86479254 |
| FBXO39:CCDS11082.1   | -1.920692577 | 0.272447208  | 27.86254794 |
| RBP1:CCDS3110.2      | -1.900489333 | 6.323494642  | 27.85691523 |
| CSMD2:CCDS380.1      | -0.91577228  | 4.069333674  | 27.85038097 |
| PRAMEF17:CCDS41264.1 | -1.945848973 | -0.010819889 | 27.8476564  |
| KRT5:CCDS8830.1      | -1.143002362 | 1.444157349  | 27.84658519 |
| TSGA13:CCDS5824.1    | -1.876937291 | 0.509359059  | 27.84599125 |
| C8orf47:CCDS34929.1  | -1.860492417 | 1.297378155  | 27.84571228 |
| GIPC3:CCDS32871.1    | -2.035774066 | -0.075285509 | 27.83560673 |
| CPNE6:CCDS9607.1     | -1.831436755 | 2.816874462  | 27.83004329 |
| SPP1:CCDS3626.1      | -1.669973161 | 4.134568915  | 27.82295053 |
| HEMGN:CCDS6731.1     | -1.940599315 | 0.22379611   | 27.79435887 |
| CLEC9A:CCDS8611.1    | -2.003956722 | -0.355297833 | 27.78185158 |
| SLC6A3:CCDS3863.1    | -1.225323646 | 1.20553977   | 27.77244672 |
| HABP2:CCDS7577.1     | -2.046757383 | 1.257784361  | 27.75167025 |
| ANXA13:CCDS47917.1   | -1.902911616 | 0.60055744   | 27.74317664 |
| HLA-DOB:CCDS4754.1   | -1.947948252 | 0.013946785  | 27.73557892 |
| BCO2:CCDS41716.1     | -1.274915103 | 1.751313772  | 27.73127934 |
| FANCB:CCDS14161.1    | -1.249873869 | 1.364873425  | 27.73052066 |
| TTR:CCDS11899.1      | -2.692406319 | 8.602766288  | 27.72405416 |
| DHRS9:CCDS2231.1     | -1.952495695 | -0.052511693 | 27.72076026 |
| BLNK:CCDS44464.1     | -1.207587355 | 1.477316203  | 27.71696211 |
| TMEM236:CCDS41492.1  | -1.955369287 | 0.15746895   | 27.70952664 |
| CFHR4:CCDS55671.1    | -1.9859032   | 1.244012703  | 27.70673902 |
| TAS2R38:CCDS34765.1  | -1.98300331  | -0.336392849 | 27.69892368 |
| CCDC70:CCDS9431.1    | -2.177841777 | -0.245673726 | 27.67077273 |
| TAC4:CCDS42360.1     | -2.069106624 | -0.179375132 | 27.66441375 |
| SCNN1B:CCDS10609.1   | -1.462259029 | 1.008783499  | 27.64806698 |
| MUC12:CCDS55139.1    | -1.036699457 | 3.741013501  | 27.63135806 |
| IGLL1:CCDS13809.1    | -2.044041496 | -0.732053449 | 27.62418102 |
| SHB:CCDS43806.1      | -1.27281816  | 4.229755464  | 27.61431101 |
| ARSF:CCDS14123.1     | -1.61441069  | 1.051604435  | 27.60927473 |
| SLC44A2:CCDS54216.1  | 1.425096913  | 8.32185888   | 27.60372465 |
| NLRP14:CCDS7776.1    | -1.085143088 | 1.37113619   | 27.59534132 |
| TNFSF14:CCDS45939.1  | -1.9947111   | -0.550645018 | 27.59341052 |
| SLC44A2:CCDS12245.1  | 1.427724971  | 8.329192373  | 27.58509366 |
| ELSPBP1:CCDS12708.1  | -1.966122755 | -0.285077888 | 27.5754359  |
| SAMD3:CCDS34539.1    | -1.426219941 | 1.798708084  | 27.56536592 |
| LYN:CCDS6162.1       | -0.971902923 | 2.701618163  | 27.5574352  |
| STEAP1B:CCDS56469.1  | -1.91322637  | -0.098234326 | 27.55434446 |
| RBM1J:CCDS35484.1    | -1.938297871 | 0.880496618  | 27.53955442 |
| SSX5:CCDS14288.1     | -1.934402501 | 0.024559327  | 27.5346577  |

## TAUvsControls

|                      |              |              |             |
|----------------------|--------------|--------------|-------------|
| ADORA3:CCDS41369.1   | -1.601637586 | -0.000905707 | 27.50736595 |
| OR6K6:CCDS30904.1    | -1.992420189 | -0.437341188 | 27.50365114 |
| ADRA2B:CCDS56129.1   | -1.63958473  | 0.168985386  | 27.48991913 |
| TRPC7:CCDS54905.1    | -2.251700869 | 1.24921246   | 27.48855645 |
| HTR6:CCDS197.1       | -1.524479694 | 0.253465597  | 27.48623674 |
| KIF25:CCDS43530.1    | -1.909064901 | 0.170497492  | 27.46457782 |
| OR51M1:CCDS53596.1   | -2.003323603 | -0.384367362 | 27.46125791 |
| OR11H1:CCDS33594.1   | -1.983630161 | -0.610225329 | 27.45911495 |
| CXorf66:CCDS35411.1  | -1.981654497 | -0.156308829 | 27.43810867 |
| HOXD12:CCDS46456.1   | -2.013673383 | -0.396371799 | 27.42186301 |
| C3orf30:CCDS2984.1   | -1.906719752 | 0.497070346  | 27.42138118 |
| FBXO47:CCDS32639.1   | -1.935360049 | 0.002229547  | 27.41994982 |
| SCUBE1:CCDS14048.1   | -1.08214783  | 4.897469     | 27.4190798  |
| CYP24A1:CCDS46616.1  | -1.945726974 | 0.473502166  | 27.40699382 |
| OTOL1:CCDS46948.1    | -2.037133737 | 0.603035173  | 27.39338816 |
| GDA:CCDS56576.1      | -1.99320864  | 1.234827644  | 27.38338215 |
| SPP1:CCDS34027.1     | -1.658243408 | 4.100628466  | 27.37335825 |
| OLR1:CCDS8618.1      | -1.996716453 | 0.745577689  | 27.3500049  |
| LRRIQ3:CCDS41350.1   | -1.495046481 | 0.956807758  | 27.33139273 |
| CD3E:CCDS31685.1     | -2.121630335 | -0.427021578 | 27.33059798 |
| OR3A2:CCDS42233.1    | -1.99031441  | -0.342491809 | 27.30671817 |
| NCF2:CCDS53447.1     | -1.338336992 | 1.193450358  | 27.3049413  |
| IYD:CCDS55066.1      | -1.866652648 | 0.18782941   | 27.30115354 |
| FHL5:CCDS5035.1      | -2.038808838 | -0.320742951 | 27.29367357 |
| LYN:CCDS47859.1      | -0.97613222  | 2.677269907  | 27.28904846 |
| SLCO4C1:CCDS34205.1  | -1.374113507 | 0.908476823  | 27.26898491 |
| CCDC144A:CCDS45621.1 | -1.175439531 | 2.167992904  | 27.26312485 |
| CNBD1:CCDS55259.1    | -1.866123083 | 0.357886775  | 27.26235461 |
| USH1C:CCDS31438.1    | -1.613932685 | 1.757850394  | 27.2575514  |
| POF1B:CCDS14452.1    | -1.948696625 | 1.337239481  | 27.25230576 |
| SERPINI2:CCDS3200.1  | -1.882581879 | 0.405288025  | 27.24220966 |
| CDH1:CCDS10869.1     | -1.645561541 | 2.338393251  | 27.23281139 |
| SLC17A2:CCDS4567.1   | -1.908376222 | 0.585345634  | 27.23103149 |
| CLEC4C:CCDS8584.1    | -2.010005058 | -0.321271378 | 27.22407439 |
| CYP2C8:CCDS55721.1   | -1.596947254 | 0.356086997  | 27.21263671 |
| OR10Q1:CCDS31547.1   | -1.988953391 | -0.169579014 | 27.19700439 |
| H1FOO:CCDS3064.1     | -2.00471923  | 0.483272165  | 27.1821205  |
| PSG2:CCDS12616.1     | -2.007188981 | 0.416673652  | 27.16697844 |
| OR2G2:CCDS31092.1    | -1.939850734 | -0.333739211 | 27.16512624 |
| NIPAL4:CCDS54944.1   | -1.456615486 | 0.962860649  | 27.15221141 |
| AIRE:CCDS13706.1     | -1.913460355 | 1.096812103  | 27.15158298 |
| OTOP1:CCDS3372.1     | -1.478651911 | 0.720399704  | 27.15054321 |
| MSTN:CCDS2303.1      | -1.929464803 | 0.044478642  | 27.14346921 |
| PRAMEF7:CCDS30593.1  | -2.038172823 | 0.307065375  | 27.12999596 |
| C1QA:CCDS226.1       | -2.10010517  | -0.709354136 | 27.11387637 |
| OR52B4:CCDS41609.1   | -2.055463514 | -0.505924787 | 27.10406176 |
| EXTL1:CCDS271.1      | -0.902424754 | 2.034752814  | 27.10321841 |
| C7orf72:CCDS47585.1  | -1.960423677 | 0.293160471  | 27.1017014  |
| SLC22A8:CCDS53643.1  | -2.09962472  | 0.587661915  | 27.07543636 |
| SLAMF6:CCDS1205.1    | -1.925849486 | 0.086317945  | 27.07434149 |
| SPN:CCDS10650.1      | -1.588677309 | -0.070676352 | 27.07071418 |

## TAUvsControls

|                       |              |              |             |
|-----------------------|--------------|--------------|-------------|
| TCN1:CCDS7978.1       | -1.448862433 | 0.594609277  | 27.04855953 |
| TMEM171:CCDS4017.1    | -1.29437996  | 0.233217168  | 27.03848729 |
| FA2H:CCDS10911.1      | -1.991510918 | 0.319451133  | 27.03479359 |
| OR2T11:CCDS31122.1    | -1.977194308 | -0.588692644 | 27.02890309 |
| TCEB3B:CCDS11932.1    | -1.628638545 | 1.298793017  | 27.02323541 |
| GDA:CCDS6641.1        | -1.978814873 | 1.199507867  | 27.02041374 |
| HIST1H1A:CCDS4569.1   | -1.955127419 | -0.39306352  | 27.01982248 |
| LAIR1:CCDS12892.1     | -1.96382015  | 0.716814309  | 27.0129605  |
| GCNT4:CCDS4026.1      | -1.976013922 | 0.193077485  | 26.99791089 |
| LIM2:CCDS12831.1      | -2.873658386 | 1.700206273  | 26.99147867 |
| KLK3:CCDS46155.1      | -1.93903219  | -0.051457444 | 26.98090987 |
| DNAH7:CCDS42794.1     | -0.987966352 | 3.791711706  | 26.96945666 |
| HEPACAM:CCDS8456.1    | -1.473851173 | 1.154924441  | 26.96654694 |
| IRF8:CCDS10956.1      | -1.876226181 | 0.974460184  | 26.96612993 |
| BCL2L10:CCDS10148.1   | -2.093579052 | -0.789629021 | 26.96298932 |
| STEAP4:CCDS43611.1    | -1.87248569  | 0.559133135  | 26.95200586 |
| MYL1:CCDS2390.1       | -3.396072086 | 2.550971267  | 26.94454039 |
| CCRL2:CCDS46814.1     | -2.036539607 | -0.169214948 | 26.93714332 |
| NCR1:CCDS56103.1      | -2.214019193 | 0.226957337  | 26.93514098 |
| TMEM171:CCDS54869.1   | -1.291172117 | 0.230889517  | 26.93394492 |
| KRTAP10-8:CCDS13713.1 | -1.999796036 | -0.689862109 | 26.91871815 |
| ASB12:CCDS14378.2     | -1.478831343 | 1.009937614  | 26.90404816 |
| ALDH8A1:CCDS55057.1   | -1.359650624 | 0.769335352  | 26.90081801 |
| TAS1R1:CCDS81.1       | -1.229605767 | 1.121043754  | 26.88689941 |
| PDX1:CCDS9327.1       | -2.021603114 | -0.520716531 | 26.87917166 |
| TINAG:CCDS4955.1      | -1.838058794 | 0.719034841  | 26.85464176 |
| NCR1:CCDS46182.1      | -2.152259119 | 0.349520673  | 26.85409804 |
| SLAMF6:CCDS53394.1    | -1.919717936 | 0.090743774  | 26.84211065 |
| MYL1:CCDS2391.1       | -3.409502985 | 2.543443007  | 26.83414989 |
| FAM194A:CCDS3151.2    | -1.265230397 | 1.23420901   | 26.7974178  |
| HENMT1:CCDS787.1      | -2.039886432 | 0.659672924  | 26.79477601 |
| PLEKHN1:CCDS53256.1   | -1.258467205 | 1.198046899  | 26.79131361 |
| NR1H4:CCDS55873.1     | -1.851891965 | 0.69170627   | 26.78823897 |
| OR8K3:CCDS31527.1     | -1.998622228 | -0.495480634 | 26.78653127 |
| DMP1:CCDS43249.1      | -1.397159079 | 0.858245333  | 26.78626079 |
| UPK1B:CCDS2985.1      | -1.956875855 | -0.202457288 | 26.77101581 |
| EMCN:CCDS3655.1       | -2.051499055 | 0.604057206  | 26.76372135 |
| ACVR1C:CCDS46432.1    | -1.93683367  | 0.211383445  | 26.74620658 |
| DIO2:CCDS45146.1      | -1.964293472 | -0.036796711 | 26.74428054 |
| CYP4B1:CCDS41328.1    | -1.874734607 | 0.783601764  | 26.74221673 |
| CYP3A4:CCDS5674.1     | -1.298194055 | 0.622260302  | 26.73416432 |
| CLEC4C:CCDS8583.1     | -1.962473406 | 0.004744601  | 26.7229365  |
| NNMT:CCDS8368.1       | -2.168759575 | 3.831166116  | 26.71604931 |
| OR5AR1:CCDS31535.1    | -1.894578235 | -0.066808392 | 26.71459461 |
| RP1:CCDS6160.1        | -2.259346219 | 2.435480843  | 26.71068152 |
| REM1:CCDS13181.1      | -1.593368635 | 0.110361787  | 26.70061995 |
| CES5A:CCDS45490.1     | -1.379560487 | 1.210961519  | 26.69249284 |
| IL1RL1:CCDS2057.1     | -1.853688767 | 0.974984735  | 26.68712471 |
| GPR116:CCDS4919.1     | -1.27135604  | 1.912325667  | 26.6627542  |
| PSG6:CCDS12613.1      | -2.085928713 | 0.673048705  | 26.65648478 |
| BIN2:CCDS8811.1       | -2.046991009 | 4.275398646  | 26.65354298 |

## TAUvsControls

|                      |              |              |             |
|----------------------|--------------|--------------|-------------|
| C12orf42:CCDS44963.1 | -1.478567594 | 0.510244726  | 26.65195808 |
| ARSI:CCDS34275.1     | -1.125137294 | 1.823391938  | 26.65072348 |
| UNC45B:CCDS45648.1   | -3.254597967 | 2.310085564  | 26.63887941 |
| VNN2:CCDS5161.1      | -1.914747458 | 0.920875892  | 26.62936303 |
| GPR171:CCDS3155.1    | -1.978339125 | -0.333014422 | 26.62601631 |
| RBM1Y1F:CCDS35483.1  | -1.909717543 | 0.87137441   | 26.62577343 |
| OR8U1:CCDS41647.1    | -1.985537403 | -0.323146997 | 26.62345625 |
| C17orf66:CCDS11299.1 | -1.33850761  | 0.996589171  | 26.6070695  |
| OR9A4:CCDS43661.1    | -2.047124925 | -0.44752119  | 26.59392146 |
| RSAD2:CCDS1656.1     | -1.880303105 | 0.276256527  | 26.59305401 |
| CYP4B1:CCDS542.1     | -1.868923091 | 0.782045739  | 26.5912922  |
| FBXW12:CCDS54577.1   | -1.42011657  | 0.931207565  | 26.58835892 |
| GPR55:CCDS2480.1     | -1.942764951 | -0.320248496 | 26.58233037 |
| CDY1:CCDS14801.1     | -1.869571416 | 0.300319909  | 26.57826359 |
| FOX1E1:CCDS35078.1   | -2.064666691 | 0.190745934  | 26.56622314 |
| CD84:CCDS53396.1     | -2.010087184 | 0.719894498  | 26.5660226  |
| CPA4:CCDS5818.1      | -2.430621814 | 3.407379402  | 26.54751342 |
| OR2W3:CCDS31099.1    | -1.676992735 | -0.298134652 | 26.54302773 |
| TMEM156:CCDS3448.1   | -1.934105257 | 0.076392733  | 26.53263255 |
| CRYBA4:CCDS13841.1   | -2.714775088 | 5.751500905  | 26.52507853 |
| ALPI:CCDS2492.1      | -1.218205915 | 0.800979994  | 26.52484999 |
| MT2A:CCDS10763.1     | -1.706532363 | 3.213794505  | 26.5230107  |
| OR4D2:CCDS32688.1    | -1.948553217 | -0.249444331 | 26.51751203 |
| DOK7:CCDS3370.2      | -1.228126965 | 1.215550655  | 26.51278271 |
| SLCO1C1:CCDS53757.1  | -2.272721072 | 1.28626184   | 26.510791   |
| UNC45B:CCDS11292.1   | -3.24618706  | 2.315459197  | 26.51040594 |
| POU2AF1:CCDS31675.1  | -1.881829692 | 0.108323245  | 26.50376154 |
| ASB10:CCDS47749.2    | -1.909018995 | 0.304132244  | 26.4954384  |
| MAGEB2:CCDS14219.1   | -1.940136731 | -0.455510875 | 26.47237195 |
| LOXHD1:CCDS54184.1   | -1.309870476 | 0.56399883   | 26.47075184 |
| SP100:CCDS56173.1    | -1.618209355 | 2.257835114  | 26.46924868 |
| CLEC6A:CCDS31739.1   | -2.015290837 | -0.679919441 | 26.46760942 |
| IL37:CCDS2107.1      | -1.952923553 | 0.267821999  | 26.4609777  |
| NR1H4:CCDS55876.1    | -1.831622478 | 0.767589842  | 26.44952495 |
| ADH1B:CCDS34033.1    | -2.009555887 | 0.420461953  | 26.44750735 |
| NR1H4:CCDS9078.1     | -1.842685483 | 0.682870712  | 26.44439236 |
| C1orf94:CCDS381.1    | -1.899140897 | -0.089280544 | 26.43782935 |
| CSF3:CCDS11358.2     | -1.938680136 | -0.384810647 | 26.43515554 |
| NOTO:CCDS46335.1     | -1.998228312 | -0.399044595 | 26.43032368 |
| CRYGS:CCDS3275.1     | -2.413106742 | 3.979895752  | 26.42128137 |
| CA5A:CCDS10965.1     | -1.938069333 | 0.055442023  | 26.41863653 |
| TTC22:CCDS44152.1    | -1.955367424 | 1.072896334  | 26.39689279 |
| GAGE12E:CCDS43945.1  | -2.205046393 | -0.763115826 | 26.39572766 |
| ZAR1:CCDS3483.1      | -1.938853382 | 0.059988797  | 26.38010722 |
| P2RX1:CCDS11040.1    | -1.874235108 | 0.547276751  | 26.37627325 |
| LCN6:CCDS7005.1      | -1.625378453 | -0.403602569 | 26.37331242 |
| FABP4:CCDS6230.1     | -1.747599218 | -0.06946493  | 26.36852447 |
| ADAMTSL5:CCDS12071.1 | -1.17126132  | 1.208140165  | 26.36129186 |
| ALDH8A1:CCDS5171.1   | -1.301636752 | 0.976522064  | 26.35896394 |
| HFE:CCDS4581.1       | -2.478265694 | 0.524048537  | 26.35314021 |
| OR111:CCDS32937.1    | -1.95230195  | -0.396676668 | 26.34205404 |



## TAUvsControls

|                     |              |              |             |
|---------------------|--------------|--------------|-------------|
| PRLR:CCDS56361.1    | -1.363505304 | 0.988379037  | 26.33255427 |
| OR10S1:CCDS31701.1  | -1.960037582 | -0.447496427 | 26.30619683 |
| TM4SF5:CCDS11054.1  | -2.011373612 | -0.570757697 | 26.30375545 |
| CCR3:CCDS2738.1     | -1.855550641 | -0.056015535 | 26.29471459 |
| CD2:CCDS889.1       | -1.850647872 | 0.150795575  | 26.28594195 |
| CD40:CCDS13394.1    | -1.206892986 | 0.840536399  | 26.27961053 |
| BPIFB4:CCDS13213.2  | -1.2981014   | 0.823594946  | 26.27658873 |
| MSH4:CCDS670.1      | -1.186426922 | 1.229726296  | 26.27075764 |
| ANO7:CCDS46563.1    | -1.956084903 | -0.330313935 | 26.25670891 |
| CNGA1:CCDS43226.1   | -1.121508071 | 1.423529667  | 26.25381579 |
| GBP6:CCDS723.1      | -1.975229871 | 1.071812725  | 26.23702199 |
| CDY1B:CCDS35487.1   | -1.879625921 | 0.238603247  | 26.23281307 |
| ARSJ:CCDS43264.1    | -1.275773238 | 1.485238419  | 26.23081662 |
| LIPI:CCDS13564.1    | -1.903265848 | 0.537961703  | 26.21043794 |
| FBXW12:CCDS2764.1   | -1.45353199  | 0.921694597  | 26.20785457 |
| CYTL1:CCDS3379.1    | -2.386244431 | 1.328216544  | 26.20552314 |
| KLKB1:CCDS34120.1   | -1.093148378 | 1.154627476  | 26.19207146 |
| CDH26:CCDS13486.1   | -1.912340528 | 0.075807921  | 26.18813126 |
| FLT3:CCDS31953.1    | -1.394741063 | 1.700750955  | 26.18706594 |
| DIO1:CCDS41339.1    | -2.303573983 | 0.05774952   | 26.16215094 |
| CALHM3:CCDS44476.1  | -1.928626256 | -0.376211461 | 26.15098695 |
| ZMYND15:CCDS11053.1 | -1.144442593 | 1.337976568  | 26.13914226 |
| TNFSF8:CCDS6810.1   | -1.955786943 | -0.516093345 | 26.13912433 |
| SLN:CCDS31667.1     | -2.929016255 | -0.787897229 | 26.13795256 |
| NR1H4:CCDS55875.1   | -1.82280846  | 0.7592006    | 26.13241574 |
| PLA2G5:CCDS202.1    | -2.067490717 | -0.356952332 | 26.10534192 |
| KRT39:CCDS11382.1   | -1.872293572 | 0.566668377  | 26.09890112 |
| HSFY1:CCDS35475.1   | -1.911698697 | -0.001111514 | 26.09533303 |
| MYOG:CCDS1433.1     | -3.630826591 | 1.55316628   | 26.09227559 |
| TKTL2:CCDS3805.1    | -1.549674766 | 0.432262729  | 26.09217433 |
| SLC23A3:CCDS42819.1 | -1.182377529 | 1.197888119  | 26.09112342 |
| CT45A3:CCDS35404.1  | -2.024226254 | -0.308883215 | 26.08851044 |
| CD1A:CCDS1174.1     | -2.01780912  | -0.264918491 | 26.06934296 |
| FASLG:CCDS1304.1    | -1.926588641 | -0.29012011  | 26.04566434 |
| PSG4:CCDS46093.1    | -1.94588382  | 0.422639901  | 26.04007037 |
| NLGN4Y:CCDS14788.1  | -1.046519389 | 3.698751449  | 26.03783626 |
| TIMD4:CCDS4332.1    | -1.858877396 | 0.424936756  | 26.03430958 |
| MYLK4:CCDS34330.1   | -1.817416072 | 0.656205271  | 26.02098023 |
| GIMAP2:CCDS5905.1   | -2.20788721  | 0.204603267  | 26.01163459 |
| SPIB:CCDS33080.1    | -1.338896287 | 0.045773891  | 26.01115824 |
| FOXH1:CCDS6428.1    | -1.510288698 | 0.012847827  | 26.00497766 |
| MANSC4:CCDS53770.1  | -1.970934036 | -0.362389117 | 26.00426317 |
| PLCXD3:CCDS34150.1  | -1.536429354 | 0.064049373  | 26.0026369  |
| C2orf70:CCDS42661.1 | -1.715254103 | -0.445973238 | 26.00193919 |
| GPCPD1:CCDS13090.1  | 1.16740816   | 4.481114948  | 25.97725834 |
| VNN1:CCDS5159.1     | -1.855935525 | 0.300504247  | 25.97669812 |
| SP100:CCDS56172.1   | -1.597349249 | 2.252559933  | 25.97283441 |
| MAS1L:CCDS4661.1    | -1.956934923 | -0.39238269  | 25.97040816 |
| CD1E:CCDS53387.1    | -1.964234512 | 0.636671207  | 25.96274863 |
| CYP3A7:CCDS5673.1   | -1.263915696 | 0.603495265  | 25.94660865 |
| IL27:CCDS10633.1    | -2.025734901 | 0.082675436  | 25.92892774 |

## TAUvsControls

|                      |              |              |             |
|----------------------|--------------|--------------|-------------|
| CSH2:CCDS11646.1     | -1.99912806  | -0.260524192 | 25.91667518 |
| SYNPR:CCDS46859.1    | -1.681654196 | 2.377887194  | 25.90848127 |
| CLDN18:CCDS3095.1    | -1.959580822 | -0.154894409 | 25.8975038  |
| CRTAM:CCDS8437.1     | -2.140728737 | 0.715359704  | 25.8890216  |
| VSIG1:CCDS14535.1    | -1.327153976 | 0.449528311  | 25.88457906 |
| GAGE2E:CCDS48111.1   | -1.501434977 | -0.173600345 | 25.87624355 |
| CASP10:CCDS56159.1   | -1.957094747 | 0.723780239  | 25.87497269 |
| HABP2:CCDS53579.1    | -2.007904844 | 1.18483832   | 25.86962768 |
| ESX1:CCDS14516.1     | -1.896141975 | -0.003770842 | 25.86872812 |
| TAAR6:CCDS5155.1     | -1.994156136 | -0.108210569 | 25.86792397 |
| CSF3R:CCDS412.1      | -1.130064516 | 1.399578272  | 25.86741766 |
| PRLR:CCDS56362.1     | -1.279457926 | 1.00299989   | 25.8653295  |
| RNF128:CCDS14521.1   | -1.577143009 | 0.468453953  | 25.86420033 |
| NR1H4:CCDS55874.1    | -1.836110328 | 0.519990328  | 25.86088063 |
| CRISP3:CCDS55019.1   | -1.920624025 | 0.018672344  | 25.85838756 |
| PSG6:CCDS33038.1     | -2.077249981 | 0.65023937   | 25.85616141 |
| CPA4:CCDS55163.1     | -2.397115469 | 3.271397553  | 25.85568781 |
| PASD1:CCDS35431.1    | -1.196886527 | 1.223114068  | 25.84805986 |
| LRRC52:CCDS30930.1   | -1.893847865 | -0.066565281 | 25.84265724 |
| TMEM213:CCDS47722.1  | -1.994051591 | -0.642075648 | 25.8372635  |
| SPAG11B:CCDS5964.1   | -2.158407692 | -0.888028884 | 25.80752265 |
| XAF1:CCDS11080.1     | -1.877617176 | 0.625915872  | 25.80384122 |
| C15orf60:CCDS45296.1 | -1.98760746  | -0.316338386 | 25.78552205 |
| GPR142:CCDS11698.1   | -1.313560678 | 0.415079527  | 25.78260678 |
| CCDC36:CCDS33755.2   | -1.829745138 | 0.910597808  | 25.77828058 |
| SFTPC:CCDS55209.1    | -1.969737708 | -0.342941079 | 25.77551116 |
| UBE2U:CCDS627.1      | -1.955471239 | -0.338942121 | 25.75779569 |
| AWAT2:CCDS35320.1    | -1.882482637 | 0.079803399  | 25.7553692  |
| SFTPC:CCDS43722.1    | -1.969624943 | -0.280583522 | 25.75294317 |
| MAGEA4:CCDS14702.1   | -1.893176786 | -0.087278435 | 25.74921523 |
| SLCO1C1:CCDS8683.1   | -2.259411769 | 1.247415367  | 25.73866559 |
| SLC10A6:CCDS3614.1   | -1.344958993 | 0.072082834  | 25.7366483  |
| OR5AS1:CCDS31516.1   | -1.901819114 | -0.471642357 | 25.72920582 |
| PROP1:CCDS4430.1     | -1.952121094 | -0.352610431 | 25.71528595 |
| MS4A12:CCDS7988.1    | -2.020089842 | -0.279783246 | 25.71185972 |
| OR2V2:CCDS4461.1     | -1.922706649 | -0.408118429 | 25.69618118 |
| CA6:CCDS30578.1      | -1.815162954 | 0.47890744   | 25.68267123 |
| MMP8:CCDS8320.1      | -1.51146916  | 0.544753221  | 25.68104023 |
| OLR1:CCDS53745.1     | -1.9424929   | 0.463527262  | 25.66769683 |
| XAF1:CCDS11081.1     | -1.858648257 | 0.414205933  | 25.66219677 |
| OIT3:CCDS7318.1      | -1.376300725 | 0.654583176  | 25.66110227 |
| RTP2:CCDS33911.1     | -1.970515485 | -0.335980821 | 25.64656406 |
| GLYAT:CCDS7970.1     | -1.943758244 | -0.541900147 | 25.63966155 |
| DES:CCDS33383.1      | -2.619661971 | 4.141804361  | 25.63732969 |
| C2orf53:CCDS1739.1   | -1.86094254  | 0.247738572  | 25.62198661 |
| GALNT5:CCDS2203.1    | -1.482180452 | 2.462625056  | 25.61226391 |
| STEAP1B:CCDS55094.1  | -1.91721484  | -0.432542656 | 25.6067869  |
| ACY3:CCDS8175.1      | -1.570517961 | -0.250778737 | 25.58855327 |
| CTSE:CCDS1462.1      | -1.878778762 | 0.450203705  | 25.57482485 |
| KCNK16:CCDS47421.1   | -1.9287895   | -0.075553018 | 25.57094901 |
| LCP1:CCDS9403.1      | -1.313019447 | 1.149396528  | 25.56114239 |

## TAUvsControls

|                      |              |              |             |
|----------------------|--------------|--------------|-------------|
| ASGR2:CCDS45598.1    | -1.854084283 | 0.467653738  | 25.55963553 |
| FGF6:CCDS8527.1      | -2.038272504 | -0.633971788 | 25.55707064 |
| FRG2B:CCDS44502.1    | -1.937506952 | -0.393174295 | 25.55663837 |
| NEB:CCDS54407.1      | -1.517129824 | 4.995115046  | 25.55634929 |
| CCRL2:CCDS43079.1    | -2.041622419 | -0.363585867 | 25.54985187 |
| GAGE12G:CCDS43947.1  | -2.143945649 | -0.731985579 | 25.54378392 |
| DUPD1:CCDS31223.1    | -2.038822529 | -0.388535634 | 25.52644991 |
| CAMK2N1:CCDS207.1    | -1.302299404 | 4.119637137  | 25.52040286 |
| OR5B3:CCDS31549.1    | -2.019002906 | -0.498034579 | 25.51218417 |
| OR5L2:CCDS31511.1    | -2.001997682 | -0.591277024 | 25.50506204 |
| HCAR1:CCDS9236.1     | -2.089371793 | -0.435324365 | 25.49289871 |
| FRK:CCDS5103.1       | -1.829718097 | 0.724395921  | 25.49194395 |
| MYLPF:CCDS10677.1    | -3.290705713 | 5.250010242  | 25.4917474  |
| GAGE12F:CCDS43946.1  | -2.090494811 | -0.72429316  | 25.47800025 |
| ZNF571:CCDS12505.1   | -1.241175847 | 2.29245636   | 25.46893002 |
| HFE:CCDS4580.1       | -2.082845109 | 0.985032     | 25.43005813 |
| CELA3A:CCDS220.1     | -1.92454707  | -0.059751614 | 25.41300066 |
| EMCN:CCDS54782.1     | -1.985081394 | 0.472501958  | 25.40098281 |
| DMC1:CCDS13973.1     | -1.208876793 | 0.835250032  | 25.40055608 |
| SLC8A3:CCDS45131.1   | -1.139894695 | 1.428182854  | 25.39475203 |
| OR4P4:CCDS31504.1    | -1.916500672 | 0.027816473  | 25.38528259 |
| SEPT14:CCDS5519.2    | -1.482651745 | 0.652654645  | 25.38360623 |
| SLC28A3:CCDS6670.1   | -1.416672621 | 1.453934119  | 25.38351431 |
| NEUROD6:CCDS5434.1   | -2.357939608 | 4.273818832  | 25.38158689 |
| FRG2C:CCDS43108.1    | -1.947533917 | -0.332886094 | 25.37398233 |
| CD84:CCDS53397.1     | -1.883115248 | 0.094083415  | 25.37045172 |
| CSRP3:CCDS7848.1     | -2.679464366 | -0.269232361 | 25.36781344 |
| OR6T1:CCDS31700.1    | -1.932748585 | -0.440241241 | 25.35590703 |
| ALDH8A1:CCDS5172.1   | -1.346351501 | 0.847755706  | 25.35582677 |
| SLC30A10:CCDS31026.1 | -1.366543336 | 1.148904809  | 25.35560449 |
| PADI3:CCDS179.1      | -1.222569472 | 1.150133114  | 25.34474493 |
| LUZP4:CCDS14567.1    | -1.906755332 | 0.100085401  | 25.33130485 |
| LMOD3:CCDS46862.1    | -2.283787267 | 0.822007644  | 25.32835332 |
| OR7G2:CCDS32897.1    | -1.564261204 | -0.287233117 | 25.32593136 |
| VNN2:CCDS5162.1      | -1.888824791 | 0.780444624  | 25.32366162 |
| RHAG:CCDS4927.1      | -1.834741822 | 0.632028932  | 25.32004802 |
| OR4E2:CCDS41916.1    | -1.880414764 | -0.287154077 | 25.31919541 |
| NOS1:CCDS55890.1     | -1.171352423 | 2.682179442  | 25.30185149 |
| OR2M2:CCDS31106.1    | -1.932317519 | -0.371043123 | 25.30087534 |
| ASGR2:CCDS32544.1    | -1.846759024 | 0.513258109  | 25.29594748 |
| PRKCH:CCDS9752.1     | -1.800657785 | 1.533377869  | 25.29432262 |
| FRMPD1:CCDS6612.1    | -1.415762683 | 2.943365305  | 25.29400236 |
| SPDYA:CCDS1767.2     | -1.847277787 | 0.440358397  | 25.28871039 |
| OR14C36:CCDS31112.1  | -1.924433322 | -0.441880797 | 25.28222706 |
| CD86:CCDS56272.1     | -1.833714678 | 0.265895619  | 25.27530073 |
| OR1Q1:CCDS35125.1    | -1.946900211 | -0.422199567 | 25.2702043  |
| OR52K1:CCDS31352.1   | -1.893501611 | -0.460316488 | 25.26364614 |
| CTNNA3:CCDS7269.1    | -1.886648158 | 1.639852618  | 25.25002839 |
| PRAMEF16:CCDS41259.1 | -1.888927179 | 0.116284605  | 25.24686247 |
| PNPLA1:CCDS54997.1   | -1.220878726 | 0.870943454  | 25.23756261 |
| MC2R:CCDS11869.1     | -1.970857971 | -0.519626132 | 25.23296814 |

## TAUvsControls

|                      |              |              |             |
|----------------------|--------------|--------------|-------------|
| SLCO1B7:CCDS44843.1  | -1.833187408 | 0.895400946  | 25.21252563 |
| ASGR2:CCDS11088.1    | -1.845424485 | 0.450711737  | 25.20457053 |
| CYP7A1:CCDS6171.1    | -2.073266147 | 0.361164044  | 25.1811176  |
| PAX9:CCDS9662.1      | -1.820333333 | 0.346063559  | 25.17616269 |
| CLIC3:CCDS7021.1     | -1.865892306 | -0.039340261 | 25.15023059 |
| C17orf74:CCDS42255.1 | -1.512675705 | 0.999061903  | 25.13941091 |
| ITGA3:CCDS11558.1    | -1.311401263 | 5.804908767  | 25.13538845 |
| CCDC68:CCDS11959.1   | -1.940493556 | 0.239772441  | 25.13531623 |
| ZPBP2:CCDS11353.2    | -1.933213649 | -0.175099091 | 25.13406251 |
| OR52E2:CCDS31371.1   | -1.878151719 | -0.493342413 | 25.1338612  |
| ATOH7:CCDS7276.1     | -2.353181054 | 1.577382111  | 25.13224724 |
| SPAG11B:CCDS47774.1  | -2.034280019 | -0.858023318 | 25.11969664 |
| RNASEH2B:CCDS9425.1  | -1.076758278 | 2.594463356  | 25.10507667 |
| CRYBB3:CCDS13830.1   | -3.239594126 | 3.637356147  | 25.09324904 |
| ATP4A:CCDS12467.1    | -1.152446452 | 1.995053491  | 25.09081091 |
| EHF:CCDS55753.1      | -1.813449074 | 0.380687518  | 25.07479919 |
| PRAMEF13:CCDS41257.1 | -1.91187077  | 0.462007584  | 25.07473309 |
| CDY1:CCDS14802.1     | -1.843799274 | 0.246291295  | 25.07274555 |
| TXNDC2:CCDS42414.1   | -1.33506934  | 0.990353305  | 25.0560035  |
| SLC2A6:CCDS6975.1    | -0.996052403 | 3.592461907  | 25.04417326 |
| CFI:CCDS34049.1      | -1.625888408 | 3.814517429  | 25.04179792 |
| PTPN20B:CCDS53534.1  | -1.787227319 | 0.875079095  | 25.03374769 |
| SERPIN3:CCDS11987.1  | -1.926356127 | 0.220901323  | 25.01087637 |
| HOXA13:CCDS5412.1    | -1.808380999 | 0.373082774  | 25.00591711 |
| OR52N5:CCDS31397.1   | -1.917738475 | -0.128938303 | 25.0024607  |
| TEX13B:CCDS14534.1   | -1.615077139 | -0.54890194  | 25.0009999  |
| PANX3:CCDS8447.1     | -1.943114687 | 0.038468132  | 24.99101804 |
| IL37:CCDS2105.1      | -1.880463703 | -0.223571398 | 24.99014806 |
| ATP6V0A4:CCDS5849.1  | -1.090260568 | 1.53234166   | 24.97929834 |
| GAGE12D:CCDS48113.1  | -2.054313377 | -0.585849817 | 24.95728069 |
| TEX11:CCDS35323.1    | -0.96181411  | 2.340313009  | 24.93530862 |
| PAGE5:CCDS14368.1    | -1.934466927 | -0.539758416 | 24.9323919  |
| FGF20:CCDS5998.1     | -1.927834125 | -0.581807413 | 24.92786216 |
| SLCO1C1:CCDS53758.1  | -2.240706512 | 1.167965627  | 24.92534699 |
| C17orf51:CCDS45629.1 | 1.925987179  | 1.360076672  | 24.9121859  |
| OR5A1:CCDS31561.1    | -1.916558129 | -0.541870238 | 24.90602347 |
| CHCHD2:CCDS5526.1    | 3.357162874  | 5.713511918  | 24.89012755 |
| ATP13A4:CCDS3304.2   | -0.901877578 | 2.081831192  | 24.88593619 |
| MGAM:CCDS47727.1     | -0.956507958 | 2.559010039  | 24.88350702 |
| OR51F1:CCDS31359.1   | -1.943937356 | -0.553051315 | 24.8801639  |
| ST8SIA6:CCDS31158.1  | -1.73918073  | 0.445158304  | 24.85539095 |
| HSPB6:CCDS12475.1    | -1.986102767 | 1.190615612  | 24.83108726 |
| EPAS1:CCDS1825.1     | -1.146192882 | 3.702500774  | 24.82810703 |
| VSIG2:CCDS8452.1     | -1.343733188 | 0.30074036   | 24.82642317 |
| MEST:CCDS5823.1      | 1.326904186  | 8.768928287  | 24.81571015 |
| G6PC2:CCDS2230.1     | -1.845314471 | 0.426175481  | 24.8128691  |
| CHI3L2:CCDS30802.1   | -1.566658547 | 1.020334872  | 24.81145863 |
| UCP1:CCDS3753.1      | -1.960916758 | -0.071194169 | 24.81007081 |
| CNGB3:CCDS6244.1     | -1.354759795 | 1.48107062   | 24.80457798 |
| CD101:CCDS891.1      | -1.055871379 | 1.792687361  | 24.79573942 |
| OR10H5:CCDS32940.1   | -1.933097735 | -0.364115322 | 24.78914986 |

## TAUvsControls

|                       |              |              |             |
|-----------------------|--------------|--------------|-------------|
| IL24:CCDS1471.1       | -1.974120585 | -0.006934038 | 24.77136495 |
| IL24:CCDS53465.1      | -1.974120585 | -0.006934038 | 24.77136495 |
| AADACL3:CCDS41252.1   | -1.942531649 | -0.67677034  | 24.76996846 |
| MCTP2:CCDS53976.1     | -2.010483283 | 0.006998724  | 24.76019797 |
| OR4F3:CCDS43415.1     | -1.969894276 | -0.607834729 | 24.75690403 |
| LIPH:CCDS3272.1       | -1.511408742 | 0.824592899  | 24.75134672 |
| PDZD9:CCDS10602.2     | -1.296977905 | 0.430203496  | 24.74575623 |
| XKRX:CCDS14476.2      | -1.798009345 | 0.18553289   | 24.72722155 |
| PLSCR2:CCDS56284.1    | -1.834427589 | -0.198129241 | 24.72654031 |
| TIMD4:CCDS54943.1     | -1.840395866 | 0.316596409  | 24.72443516 |
| PRM2:CCDS42118.1      | -1.935081957 | -0.670250371 | 24.7184765  |
| ZSCAN4:CCDS12958.1    | -1.832745154 | -0.05813085  | 24.7002096  |
| OR2F2:CCDS43666.1     | -1.95089105  | -0.560504224 | 24.70001981 |
| CT47A6:CCDS35386.1    | -1.868481612 | -0.193437737 | 24.6959701  |
| BANK1:CCDS34038.1     | -1.941916743 | 1.500363193  | 24.68834908 |
| OR51V1:CCDS31375.1    | -1.876390462 | -0.348478192 | 24.68483612 |
| KRTAP10-4:CCDS42957.1 | -1.819845223 | 0.02479591   | 24.66558173 |
| KRTAP10-1:CCDS42954.1 | -1.93667396  | -0.552945222 | 24.65539344 |
| FPR3:CCDS12841.1      | -1.614068076 | -0.501503037 | 24.65139951 |
| SLC8A3:CCDS9799.1     | -0.983220894 | 2.505341455  | 24.63997007 |
| FCRLA:CCDS53417.1     | -1.870192097 | 0.596941794  | 24.63878248 |
| SLC8A3:CCDS53904.1    | -0.988761395 | 2.535077849  | 24.63849964 |
| PSMB11:CCDS41923.1    | -1.93913836  | -0.51439421  | 24.62782352 |
| PRSS55:CCDS56523.1    | -1.896406694 | -0.079682094 | 24.62619221 |
| CCR9:CCDS2733.1       | -1.889341795 | 0.047908189  | 24.62022787 |
| GCM1:CCDS4950.1       | -1.463935399 | 0.349702782  | 24.60912765 |
| ZP1:CCDS31572.1       | -1.292934262 | 1.25369961   | 24.56945424 |
| UGT2A3:CCDS3525.1     | -1.901921416 | 0.511072916  | 24.56264704 |
| OR2A25:CCDS43669.1    | -1.884119753 | -0.330793263 | 24.55224492 |
| LOXHD1:CCDS45862.1    | -1.257000539 | 0.705977131  | 24.54892307 |
| KRT86:CCDS41785.1     | -1.635345816 | 1.53945558   | 24.54364457 |
| ADARB1:CCDS33590.1    | -0.975290355 | 3.856740224  | 24.52107665 |
| CD1D:CCDS1173.1       | -1.894096191 | 0.288433181  | 24.50870165 |
| OR51B6:CCDS31379.1    | -1.874418129 | -0.140114753 | 24.49675431 |
| NEB:CCDS46424.1       | -1.517120131 | 4.654596273  | 24.49368348 |
| TNFRSF17:CCDS10552.1  | -2.067415764 | -0.429563506 | 24.490853   |
| OR7E24:CCDS45955.1    | -1.540954299 | 0.075934701  | 24.48999046 |
| ZNF705D:CCDS43712.1   | -1.929531293 | -0.4717303   | 24.48960576 |
| FCN1:CCDS6985.1       | -1.40636494  | 0.712915295  | 24.48755318 |
| RNLS:CCDS7388.1       | -2.082299149 | 0.959237014  | 24.48465595 |
| TMEM45B:CCDS8482.1    | -1.454224636 | 0.273486578  | 24.45819644 |
| GHSR:CCDS46959.1      | -1.926265743 | -0.031971239 | 24.45605923 |
| GRXCR1:CCDS43225.1    | -1.909878694 | -0.324166108 | 24.44791748 |
| OR4K15:CCDS32026.1    | -1.905748358 | -0.524107016 | 24.43847381 |
| MEST:CCDS5822.1       | 1.320846271  | 8.803875819  | 24.43426401 |
| OR2T33:CCDS31109.1    | -1.879846361 | -0.35950947  | 24.41717426 |
| ITGA3:CCDS11557.1     | -1.283207248 | 5.822364139  | 24.41623942 |
| ADARB1:CCDS42970.1    | -0.931871241 | 3.979650636  | 24.41622527 |
| PTPN20B:CCDS41512.1   | -1.840010523 | 0.110305285  | 24.4141232  |
| ARPP21:CCDS2661.1     | -1.382300761 | 2.87003358   | 24.40514235 |
| CXorf65:CCDS35324.1   | -1.572665173 | -0.117291255 | 24.39869693 |

## TAUvsControls

|                      |              |              |             |
|----------------------|--------------|--------------|-------------|
| OR10K2:CCDS30896.1   | -1.902845201 | -0.458925327 | 24.3978417  |
| KCNK16:CCDS47422.1   | -1.8832878   | -0.125505198 | 24.39549534 |
| OR5M1:CCDS53631.1    | -1.876637441 | -0.473592972 | 24.39436432 |
| GJA10:CCDS5025.1     | -1.793156031 | 0.333185931  | 24.38663865 |
| ELTD1:CCDS41352.1    | -1.179709952 | 0.899954679  | 24.38248075 |
| KCNH5:CCDS9756.1     | -1.329775902 | 1.772042163  | 24.36717622 |
| TSPAN8:CCDS8999.1    | -1.909469511 | -0.144251017 | 24.36164283 |
| CIDEC:CCDS2587.1     | -1.839403113 | 0.221122161  | 24.3604481  |
| OR4D6:CCDS31562.1    | -1.904521982 | -0.51592732  | 24.3565364  |
| CTSE:CCDS1461.1      | -1.861693773 | 0.325938792  | 24.35602984 |
| ABCA9:CCDS11681.1    | -1.131267236 | 2.79122018   | 24.34408435 |
| MAGEA6:CCDS14708.1   | -1.874945851 | -0.477404475 | 24.34237191 |
| KCNG4:CCDS10945.1    | -1.909227689 | 0.481023166  | 24.3095111  |
| CD69:CCDS8604.1      | -1.989239695 | -0.540361487 | 24.3081695  |
| SLC2A6:CCDS48052.1   | -0.9737745   | 3.47082293   | 24.30300071 |
| LGALS4:CCDS12521.1   | -1.266860032 | 0.231170189  | 24.29961641 |
| PAPPA2:CCDS41438.1   | -1.205696334 | 3.371216675  | 24.297038   |
| OR52N1:CCDS31398.1   | -1.918693029 | -0.580988763 | 24.29576863 |
| SYNPR:CCDS46860.1    | -1.617760851 | 2.323472261  | 24.29545029 |
| HEATR4:CCDS9815.2    | -0.918649541 | 1.740914614  | 24.28926601 |
| SCXB:CCDS43779.1     | -1.471654251 | 2.149177386  | 24.26139375 |
| CCDC89:CCDS8270.1    | -1.796719408 | 0.139676412  | 24.25163406 |
| ADARB1:CCDS33589.1   | -0.934612652 | 3.974378333  | 24.24338899 |
| OR1N2:CCDS35123.1    | -1.913342842 | -0.156092862 | 24.24079337 |
| C6orf58:CCDS34533.1  | -1.866087395 | -0.082506851 | 24.23279545 |
| SLC38A4:CCDS8750.1   | -2.345676744 | 1.414090194  | 24.21745741 |
| CASP4:CCDS8327.1     | -1.848037766 | 1.796280764  | 24.2121173  |
| CSF2RA:CCDS35193.1   | -1.050548057 | 1.483055617  | 24.19653165 |
| NOS1:CCDS41842.1     | -1.145896387 | 2.636750955  | 24.19104689 |
| MNDA:CCDS1177.1      | -1.850194396 | 0.186586113  | 24.18781269 |
| HLA-DPA1:CCDS4764.1  | -1.308501658 | 0.480081008  | 24.17944869 |
| B3GNT6:CCDS53681.1   | -1.903933118 | 0.251108461  | 24.17775899 |
| CXorf36:CCDS14266.1  | -1.908853003 | -0.241510277 | 24.17446105 |
| OR3A3:CCDS11025.1    | -1.91171098  | -0.282421706 | 24.16909317 |
| DMBT1:CCDS44491.1    | -1.622823419 | 3.27805503   | 24.16734821 |
| LYPD4:CCDS12587.1    | -2.362241098 | 0.988572521  | 24.16067108 |
| SPAG11A:CCDS43700.1  | -2.08656039  | -0.96564696  | 24.15291338 |
| ABCB4:CCDS5606.1     | -1.073620349 | 2.212088999  | 24.15061803 |
| C4BPB:CCDS1476.1     | -1.873903496 | -0.056615333 | 24.14831475 |
| PMP2:CCDS6229.1      | -2.03408077  | -0.311756177 | 24.14225209 |
| SLC26A9:CCDS30990.1  | -0.997968839 | 1.48983799   | 24.13343872 |
| C4BPB:CCDS31005.1    | -1.875264103 | -0.060613875 | 24.12775679 |
| HIST1H4E:CCDS4593.1  | 2.21326959   | 2.811853794  | 24.12189525 |
| KRT23:CCDS11380.1    | -1.292510601 | 0.872007119  | 24.11462991 |
| FLT1:CCDS9330.1      | -1.151070306 | 2.761104825  | 24.10723429 |
| APOBEC3A:CCDS13981.1 | -1.982466993 | -0.511927316 | 24.10117706 |
| IGSF1:CCDS14630.1    | -1.32101049  | 0.647887462  | 24.09721504 |
| KIR2DL1:CCDS12904.1  | -1.795520176 | 1.069422044  | 24.09643843 |
| PRR23B:CCDS33868.1   | -1.884053298 | -0.27789642  | 24.0829913  |
| ZNF625:CCDS12269.2   | 0.909711265  | 2.420295647  | 24.06129913 |
| L1TD1:CCDS619.1      | -1.162268547 | 1.17533451   | 24.06085944 |

## TAUvsControls

|                      |              |              |             |
|----------------------|--------------|--------------|-------------|
| SLC8A3:CCDS41967.1   | -1.141534028 | 1.210708495  | 24.05535114 |
| CCL5:CCDS11300.1     | -2.006628612 | -0.673214908 | 24.05430455 |
| OR52K2:CCDS31351.1   | -1.887752726 | -0.462898101 | 24.05189741 |
| OR8D4:CCDS31698.1    | -1.943512537 | -0.567603916 | 24.0501462  |
| C3orf20:CCDS54555.1  | -1.123723075 | 1.207823409  | 24.03035468 |
| ABCB4:CCDS5605.1     | -1.074079441 | 2.201268641  | 24.02965889 |
| TMEM61:CCDS601.1     | -1.92200309  | -0.503359184 | 24.02068572 |
| DCAF4L1:CCDS33978.1  | -1.923015227 | -0.204178811 | 24.01853153 |
| OR6F1:CCDS31095.1    | -1.97312923  | -0.543179638 | 24.01760104 |
| PROZ:CCDS9531.1      | -1.354739757 | 0.355898091  | 24.00729138 |
| TAS2R39:CCDS47729.1  | -1.996340763 | -0.461255242 | 24.00377734 |
| HYAL4:CCDS5789.1     | -1.842340238 | -0.045102517 | 23.99825355 |
| MMP13:CCDS8324.1     | -1.898233459 | 0.692158326  | 23.99430663 |
| HAUS4:CCDS53886.1    | 0.821071706  | 4.208521581  | 23.99127818 |
| WIPF3:CCDS56472.1    | -1.129736559 | 3.151560057  | 23.99063676 |
| CCDC42:CCDS11145.1   | -1.441732112 | 0.266297256  | 23.98574773 |
| PTAFR:CCDS318.1      | -1.835878639 | 0.051941775  | 23.98319647 |
| OR13C2:CCDS35092.1   | -1.991140522 | -0.695887363 | 23.97944007 |
| SPATA22:CCDS54066.1  | -1.84580174  | 0.339573039  | 23.97516942 |
| DPYS:CCDS6302.1      | -1.501544554 | 0.891199165  | 23.97449864 |
| SLCO1C1:CCDS53759.1  | -2.201032875 | 1.009970677  | 23.96956459 |
| SLC8A3:CCDS35498.1   | -0.974455317 | 2.555489141  | 23.96620708 |
| ILDRL:CCDS56270.1    | -1.944338087 | 0.482034346  | 23.95563709 |
| KLK1:CCDS12804.1     | -1.474606094 | 0.169025595  | 23.95539148 |
| KNG1:CCDS3281.1      | -1.728427457 | 0.646226352  | 23.95110738 |
| HSFY2:CCDS14791.1    | -1.852575686 | -0.001837926 | 23.9494729  |
| CRP:CCDS30911.1      | -1.925129826 | -0.333684487 | 23.94910086 |
| LEFTY2:CCDS53479.1   | -1.663477898 | 0.638050592  | 23.94850885 |
| POTEG:CCDS32018.1    | -1.848668828 | 0.842712463  | 23.94693906 |
| CD40:CCDS13393.1     | -1.096499022 | 1.138162964  | 23.93794058 |
| SLC37A2:CCDS31714.1  | -1.154443059 | 1.228783472  | 23.93698996 |
| PIP5K1B:CCDS6624.1   | -0.966583004 | 2.217608875  | 23.93506911 |
| DDX60L:CCDS47161.1   | -1.366314809 | 2.906840004  | 23.91537395 |
| MMP20:CCDS8318.1     | -1.749422604 | 0.45287628   | 23.91392403 |
| IL18R1:CCDS2060.1    | -1.697245344 | 1.026723517  | 23.90047984 |
| C21orf62:CCDS42919.2 | -1.136970273 | 0.400078173  | 23.89512622 |
| REG4:CCDS906.1       | -1.922674253 | -0.383212398 | 23.89076993 |
| CLEC12B:CCDS8610.1   | -1.934441447 | -0.522545443 | 23.8850328  |
| GSG1:CCDS55808.1     | -1.049842531 | 1.830032274  | 23.87829711 |
| OR8J3:CCDS31520.1    | -1.898699827 | -0.635336183 | 23.87354876 |
| COX6A2:CCDS10712.1   | -3.049136522 | 0.133242744  | 23.8717323  |
| ASB5:CCDS3827.1      | -2.130842452 | 0.183951709  | 23.8686435  |
| TRIM54:CCDS1745.2    | -2.133698696 | 0.677327762  | 23.86833787 |
| CT47B1:CCDS48161.1   | -1.515470384 | -0.310418408 | 23.86656864 |
| OR6B3:CCDS42837.1    | -1.844600093 | -0.335964322 | 23.86494914 |
| CXorf48:CCDS14647.1  | -1.833013212 | -0.321826739 | 23.8583627  |
| FBXW12:CCDS54578.1   | -1.432296731 | 0.691537765  | 23.85819014 |
| MS4A2:CCDS7980.1     | -1.874701985 | -0.457925907 | 23.8577771  |
| HOXC11:CCDS8867.1    | -2.213377506 | 0.111650983  | 23.85150425 |
| GPR110:CCDS4920.1    | -1.922500957 | -0.062407042 | 23.84285809 |
| TMEM132E:CCDS11283.1 | -1.045823388 | 3.686301093  | 23.84014874 |

## TAUvsControls

|                        |              |              |             |
|------------------------|--------------|--------------|-------------|
| F8:CCDS35457.1         | -1.005929571 | 3.000443853  | 23.83441161 |
| CRISP3:CCDS4929.2      | -1.86662853  | -0.039855013 | 23.82763618 |
| CD200R1:CCDS2969.1     | -1.779553836 | 0.196467586  | 23.82621505 |
| APCDD1L:CCDS13467.1    | -1.295173441 | 0.348847265  | 23.82315437 |
| IL1RL1:CCDS2058.1      | -1.768088625 | 0.31347278   | 23.81994374 |
| TACSTD2:CCDS609.1      | -1.988603926 | -0.3824726   | 23.81184059 |
| KLHL34:CCDS14199.1     | -1.316920893 | 0.780008332  | 23.81033059 |
| L3MBTL4:CCDS11839.2    | -1.162316163 | 1.444862652  | 23.80533588 |
| EPHX2:CCDS6060.1       | 1.012162502  | 4.752161602  | 23.79285658 |
| CD1E:CCDS41421.1       | -1.817216943 | 0.645239195  | 23.79138048 |
| LRG1:CCDS12130.1       | -1.8763265   | -0.088976273 | 23.77907575 |
| KRTAP10-12:CCDS42967.1 | -1.883269949 | -0.624102484 | 23.77118904 |
| SPDYE4:CCDS45609.1     | -1.86278093  | -0.168578782 | 23.7706458  |
| APOA4:CCDS31681.1      | -1.914898587 | 0.22736138   | 23.76970947 |
| SLC8A3:CCDS9800.1      | -0.960154782 | 2.490760008  | 23.75937324 |
| CD28:CCDS2361.1        | -1.897946293 | -0.25154489  | 23.75341644 |
| CTLA4:CCDS42803.1      | -1.964289942 | -0.811614019 | 23.73821534 |
| BTNL8:CCDS54959.1      | -1.857426555 | 0.041073697  | 23.72215348 |
| FGF5:CCDS3586.1        | -1.930711862 | -0.590721168 | 23.7194121  |
| SERPINA9:CCDS41983.1   | -1.825117334 | 0.0162116    | 23.7008243  |
| F3:CCDS53345.1         | -1.032624952 | 1.438681858  | 23.69000205 |
| HAVCR1:CCDS43392.1     | -1.780889702 | 0.320444942  | 23.68833475 |
| FGL1:CCDS6004.1        | -1.809747579 | 0.067911923  | 23.68294155 |
| OR4D5:CCDS31699.1      | -1.946898438 | -0.621759963 | 23.67463965 |
| POTEM:CCDS45076.1      | -1.848289508 | 0.807781105  | 23.66652163 |
| OR2J2:CCDS43434.1      | -1.841465516 | -0.357059165 | 23.66599906 |
| EPHX3:CCDS12327.1      | -1.458472702 | 0.379496564  | 23.66269478 |
| ATP10B:CCDS43394.1     | -1.750592907 | 2.261191606  | 23.65997901 |
| NEB:CCDS54408.1        | -1.466892041 | 5.001262264  | 23.64790854 |
| UGT3A2:CCDS3914.1      | -1.247579894 | 0.790458077  | 23.64433846 |
| NCF2:CCDS53446.1       | -1.267342536 | 1.071382504  | 23.63801953 |
| CYP19A1:CCDS10139.1    | -1.791127268 | 0.82930442   | 23.63735652 |
| FATE1:CCDS14700.1      | -1.948914288 | -0.670202244 | 23.62486672 |
| CASP14:CCDS12323.1     | -1.920444127 | -0.451056279 | 23.61777925 |
| CSH2:CCDS42368.1       | -2.054582204 | -0.703270153 | 23.61574549 |
| LCN8:CCDS35183.1       | -1.898380443 | -0.631681581 | 23.61428509 |
| LGR5:CCDS9000.1        | -1.178411362 | 3.052078406  | 23.61286073 |
| LEMD1:CCDS55678.1      | -1.079920389 | 2.254302207  | 23.61205484 |
| PRR23A:CCDS46923.1     | -1.863977934 | -0.382404474 | 23.60890524 |
| ARHGEF38:CCDS3670.1    | -1.855720068 | -0.446574724 | 23.59918916 |
| PRSS55:CCDS5976.1      | -1.82555867  | 0.11423039   | 23.59465326 |
| OR2T8:CCDS31100.1      | -1.883844147 | -0.344676194 | 23.57519601 |
| LYZL1:CCDS31174.1      | -1.903570542 | -0.61386897  | 23.56822027 |
| PRPS1L1:CCDS47552.1    | -1.505025444 | -0.193117692 | 23.56087963 |
| ASB4:CCDS5641.1        | -1.85279178  | 0.259559545  | 23.56038925 |
| CYP2C19:CCDS7436.1     | -1.803247021 | 0.446383663  | 23.55295914 |
| AVP:CCDS13045.1        | -1.95274356  | -0.771126743 | 23.54831003 |
| EVPLL:CCDS45626.1      | -1.77864845  | 0.418041954  | 23.54013999 |
| FAM9B:CCDS14132.1      | -1.918554846 | -0.113329588 | 23.52013788 |
| VGLL2:CCDS5115.1       | -2.635930298 | 0.324100925  | 23.50688786 |
| CUZD1:CCDS7631.1       | -1.51122159  | 1.076287599  | 23.50599506 |



## TAUvsControls

|                      |              |              |             |
|----------------------|--------------|--------------|-------------|
| TPSD1:CCDS10432.1    | -1.899445982 | -0.378663765 | 23.50479959 |
| DMP1:CCDS3623.1      | -1.342773095 | 0.988972436  | 23.46801082 |
| OR1L3:CCDS35128.1    | -1.826172443 | -0.413027883 | 23.4626989  |
| HSD3B2:CCDS902.1     | -1.880873278 | -0.231409336 | 23.45599268 |
| TAC4:CCDS42358.1     | -1.91095061  | -0.672648877 | 23.45533039 |
| PRDM1:CCDS5054.2     | -1.315467269 | 1.961995536  | 23.45458564 |
| ARHGAP27:CCDS32670.1 | -1.491624377 | -0.460234952 | 23.45234518 |
| P2RY10:CCDS14442.1   | -1.869900507 | -0.136273941 | 23.43749608 |
| ALOX15B:CCDS32559.1  | -1.098654905 | 1.020444764  | 23.430443   |
| METTL21C:CCDS32003.1 | -1.980091164 | -0.657088461 | 23.42314972 |
| MMRN2:CCDS7379.1     | -1.029865323 | 1.561597688  | 23.42085239 |
| C10orf91:CCDS7668.1  | -1.925098312 | -0.580059253 | 23.41141127 |
| PTPN20B:CCDS53535.1  | -1.776271281 | 0.833669294  | 23.41130157 |
| HNMT:CCDS33296.1     | -1.379041984 | -0.123332952 | 23.41008802 |
| C7orf33:CCDS5890.1   | -2.592076399 | 0.002133227  | 23.40675583 |
| DIO1:CCDS53320.1     | -2.298316383 | -0.25424093  | 23.38973253 |
| ZNF80:CCDS2979.1     | -1.712209841 | -0.200970425 | 23.38933199 |
| OR10Z1:CCDS30901.1   | -1.917581603 | -0.533118216 | 23.38817907 |
| GABRA6:CCDS4356.1    | -1.819020326 | 0.332340503  | 23.38662836 |
| WBP2NL:CCDS14029.1   | -1.527229481 | -0.226246558 | 23.37234008 |
| CYSLTR2:CCDS9412.1   | -1.858017518 | -0.229128603 | 23.36637953 |
| TPTE:CCDS33512.1     | -1.28980421  | 1.68921956   | 23.36552445 |
| CD48:CCDS1208.1      | -1.815246703 | -0.217138432 | 23.36282554 |
| CD109:CCDS55038.1    | -1.758974725 | 3.053315074  | 23.36247213 |
| VSX2:CCDS9827.1      | -1.918896207 | 3.464312563  | 23.35831413 |
| CD109:CCDS4982.1     | -1.754259851 | 3.066099569  | 23.3533222  |
| GPR15:CCDS2931.1     | -1.928294477 | -0.144256082 | 23.34664076 |
| LRRC2:CCDS2741.1     | -1.430610424 | 0.377366668  | 23.34211704 |
| HFE:CCDS54975.1      | -2.029363049 | 0.891566437  | 23.32306945 |
| CRISP1:CCDS4931.1    | -1.824232255 | 0.258403975  | 23.32111954 |
| UGT3A2:CCDS54842.1   | -1.262418385 | 0.698552448  | 23.31684929 |
| FCRLA:CCDS53419.1    | -1.842564041 | 0.299336634  | 23.31022936 |
| MAGEB3:CCDS14220.1   | -1.863879304 | -0.279086994 | 23.30542137 |
| ADAM33:CCDS13058.1   | -1.5418247   | 2.549137387  | 23.29389724 |
| SLC25A48:CCDS43366.2 | -1.655279943 | -0.303059914 | 23.29032695 |
| IFNW1:CCDS6496.1     | -1.883847271 | -0.724001804 | 23.2867057  |
| TSPY3:CCDS48204.1    | -1.847968895 | 1.228171982  | 23.28455643 |
| KNG1:CCDS54695.1     | -1.730476702 | 0.438376052  | 23.27575004 |
| KRT18:CCDS31809.1    | -1.521570243 | 6.011476158  | 23.27178584 |
| CACNA1S:CCDS1407.1   | -1.81237419  | 2.971477244  | 23.26420145 |
| GPR25:CCDS1405.1     | -1.519415442 | 0.195777633  | 23.25820276 |
| OR6V1:CCDS47728.1    | -1.88418088  | -0.502318514 | 23.25785198 |
| PDE2A:CCDS8216.1     | -1.188732961 | 4.524290693  | 23.25272819 |
| FCRLA:CCDS53416.1    | -1.856440951 | 0.642789798  | 23.24972329 |
| CCR1:CCDS2737.1      | -1.840628294 | -0.314492025 | 23.24127014 |
| BANK1:CCDS47116.1    | -1.904290882 | 1.452642939  | 23.23833754 |
| C3orf20:CCDS33706.1  | -1.048037917 | 1.42498932   | 23.22956241 |
| OR2H1:CCDS4660.1     | -1.805632516 | -0.179018356 | 23.22916838 |
| NLRP6:CCDS7693.1     | -1.054072545 | 1.421917586  | 23.22029265 |
| OR1A2:CCDS11021.1    | -1.936053246 | -0.7210355   | 23.21041495 |
| POU1F1:CCDS46873.1   | -1.782583892 | 0.165805874  | 23.19722551 |

## TAUvsControls

|                     |              |              |             |
|---------------------|--------------|--------------|-------------|
| CASP4:CCDS41704.1   | -1.803837952 | 1.632453789  | 23.18786527 |
| EPHA1:CCDS5884.1    | -1.417581578 | 1.914401494  | 23.18107383 |
| GDA:CCDS56577.1     | -1.953392272 | 0.673354328  | 23.18044653 |
| OR5B17:CCDS31548.1  | -1.883768614 | -0.498763702 | 23.17465043 |
| PRLR:CCDS56360.1    | -1.314316062 | 0.694652769  | 23.17320891 |
| OR2K2:CCDS6778.1    | -1.910082432 | 0.182362436  | 23.15832369 |
| OXTR:CCDS2570.1     | -1.202025001 | 0.502573745  | 23.15328691 |
| ISL1:CCDS43314.1    | -1.448746504 | 3.192538434  | 23.14596108 |
| FCGR3A:CCDS44265.1  | -1.79356017  | 0.197930729  | 23.1452717  |
| SERPINC1:CCDS1313.1 | -1.842552401 | 0.469652827  | 23.13518225 |
| LAX1:CCDS44297.1    | -1.45362936  | 0.127830034  | 23.12670538 |
| OR10P1:CCDS31828.1  | -1.860612637 | -0.283824082 | 23.12654874 |
| CCR4:CCDS2656.1     | -1.79952391  | -0.207385207 | 23.12334607 |
| TMC5:CCDS42126.1    | -1.079579746 | 1.858729754  | 23.12232078 |
| BANK1:CCDS47115.1   | -1.911693828 | 1.303443138  | 23.11585147 |
| OR4S2:CCDS31505.1   | -1.850299331 | -0.457980691 | 23.10712917 |
| SOCS3:CCDS11756.1   | -1.114097732 | 1.956347646  | 23.10575382 |
| GFRAL:CCDS4957.1    | -1.765837674 | 0.14706282   | 23.10158593 |
| C1orf172:CCDS293.1  | -2.057410712 | 0.816163884  | 23.09705647 |
| OR4K17:CCDS32030.1  | -1.796533657 | -0.252893932 | 23.08666237 |
| MS4A7:CCDS7986.1    | -1.856524218 | -0.178944468 | 23.0797002  |
| LCK:CCDS359.1       | -1.092833279 | 0.783160141  | 23.0787937  |
| LY6H:CCDS6396.1     | 1.76759079   | 4.491718449  | 23.07638881 |
| OR56B1:CCDS31395.1  | -1.994952025 | -0.508110098 | 23.07059904 |
| CD109:CCDS55039.1   | -1.759737322 | 3.025209128  | 23.06959703 |
| NWD1:CCDS32945.2    | -0.917945511 | 2.286959684  | 23.06751352 |
| GABRA4:CCDS3473.1   | -1.999001021 | 0.971608981  | 23.04823976 |
| CT47A7:CCDS35385.1  | -1.847914248 | -0.322420772 | 23.04052726 |
| CLDN14:CCDS13645.1  | -1.891398985 | -0.712403885 | 23.03735345 |
| TMEM215:CCDS6530.1  | -1.960381851 | -0.705020702 | 23.03654397 |
| GAGE2D:CCDS43941.1  | -1.516039624 | 0.046394968  | 23.03498238 |
| IGLON5:CCDS46158.1  | -1.027922946 | 4.921279369  | 23.02825566 |
| OPALIN:CCDS7448.1   | -1.971911309 | -0.094284707 | 23.0236002  |
| GSG1:CCDS44835.1    | -1.039154217 | 1.899941068  | 23.01313964 |
| SLC37A2:CCDS44757.1 | -1.149479735 | 1.195805412  | 23.01235707 |
| BLNK:CCDS7446.1     | -1.142791658 | 1.578111707  | 23.00821193 |
| PDE2A:CCDS44670.1   | -1.182249454 | 4.506407063  | 23.00785232 |
| CHMP3:CCDS54375.1   | 0.956688285  | 4.487959786  | 23.00783638 |
| GPR62:CCDS2838.1    | -1.930432918 | -0.021662766 | 23.00590988 |
| SLC22A13:CCDS2676.1 | -1.376155277 | 0.935106602  | 23.00408287 |
| PDE2A:CCDS53678.1   | -1.181192943 | 4.508864044  | 23.00136702 |
| ADCY4:CCDS9627.1    | -1.19865077  | 2.070026459  | 22.9987004  |
| DIO1:CCDS41340.1    | -2.164637872 | -0.333979766 | 22.99753606 |
| CCR8:CCDS2684.1     | -1.875734767 | -0.200549351 | 22.99657725 |
| LAX1:CCDS1441.2     | -1.464133456 | 0.189861041  | 22.98409622 |
| CT45A2:CCDS44002.1  | -1.95654187  | -0.389088451 | 22.97712014 |
| CYP1A1:CCDS10268.1  | -1.498316197 | 1.311449524  | 22.95261336 |
| LDLRAD2:CCDS30624.1 | -1.939730319 | -0.090933958 | 22.95001009 |
| MESP2:CCDS42078.1   | -1.159704021 | 0.310033453  | 22.94904646 |
| CCDC73:CCDS41630.1  | -1.008840247 | 2.040345698  | 22.94847869 |
| SLC35G5:CCDS5980.1  | -1.792348607 | 0.588793179  | 22.92217194 |

## TAUvsControls

|                     |              |              |             |
|---------------------|--------------|--------------|-------------|
| LEMD1:CCDS55677.1   | -1.07368932  | 1.62348711   | 22.91356492 |
| ABCB4:CCDS5607.1    | -1.050817321 | 2.15734801   | 22.91333976 |
| OR5T2:CCDS31523.1   | -1.824107135 | -0.310713812 | 22.90077695 |
| IGFBP7:CCDS3512.1   | -1.738583921 | 5.454553302  | 22.89517509 |
| C4orf51:CCDS47140.1 | -1.866630785 | -0.419976282 | 22.89355393 |
| FCGR3A:CCDS1232.1   | -1.787213554 | 0.206599125  | 22.8902642  |
| MB21D2:CCDS3302.2   | -0.90198031  | 3.096084946  | 22.88854725 |
| PGR:CCDS8310.1      | -1.047883239 | 1.417719421  | 22.84331693 |
| HLA-DQA1:CCDS4752.1 | -1.887124903 | 0.245329443  | 22.84298638 |
| STYK1:CCDS8629.1    | -1.84113715  | 0.484130617  | 22.84126282 |
| OR8B12:CCDS31711.1  | -1.865418009 | -0.581833055 | 22.83944474 |
| TRPV6:CCDS5874.1    | -1.068144835 | 1.296383458  | 22.83006898 |
| MRO:CCDS11947.1     | -1.502901712 | 0.108393965  | 22.827665   |
| TAS1R1:CCDS82.1     | -1.383820074 | 0.676761172  | 22.81279972 |
| ATP8B1:CCDS11965.1  | -1.141480393 | 2.709847529  | 22.80802783 |
| HOXD9:CCDS2267.2    | -1.599169109 | 1.04393601   | 22.80169538 |
| SSX5:CCDS14289.1    | -1.8626537   | -0.252464275 | 22.79529973 |
| OR5F1:CCDS31515.1   | -1.806611124 | -0.184928015 | 22.79310296 |
| DYNLT3:CCDS14243.1  | -1.212269698 | 0.917270212  | 22.79115505 |
| MPZL2:CCDS8393.1    | -1.993812108 | -0.088346398 | 22.7868696  |
| CCR5:CCDS2739.1     | -1.872232445 | -0.462799032 | 22.78132319 |
| SLC10A2:CCDS9506.1  | -1.926153478 | -0.088047226 | 22.78080802 |
| RBP3:CCDS7218.1     | -2.304009075 | 2.602887577  | 22.77577911 |
| FDCSP:CCDS3537.1    | -2.27969698  | -0.672151984 | 22.77094675 |
| ITGAX:CCDS10711.1   | -1.054904641 | 2.02917604   | 22.77016571 |
| KCNG3:CCDS1809.1    | -1.29347158  | 0.263021759  | 22.74938298 |
| HSPB3:CCDS3961.1    | -2.601961596 | -0.46798504  | 22.74902601 |
| LEFTY2:CCDS1549.1   | -1.630896415 | 0.649416981  | 22.73814368 |
| KLHL38:CCDS43766.1  | -1.952965162 | 0.552100072  | 22.7366356  |
| KDM5D:CCDS55555.1   | -1.851584715 | 3.489268658  | 22.7313709  |
| SLFN12L:CCDS56026.1 | -1.76555909  | 0.437160452  | 22.72774672 |
| NFATC2:CCDS13437.1  | -1.069162214 | 1.68651937   | 22.71281752 |
| OR52D1:CCDS31384.1  | -1.842188382 | -0.346143032 | 22.71224476 |
| OR5M10:CCDS53630.1  | -1.826916569 | -0.476461859 | 22.71154087 |
| GOLT1A:CCDS1443.1   | -1.545469967 | -0.54136572  | 22.71002018 |
| NOG:CCDS11589.1     | -1.067760682 | 0.585937504  | 22.70955215 |
| FFAR1:CCDS12458.1   | -1.828305436 | -0.402270263 | 22.7085596  |
| FUT7:CCDS7022.1     | -1.304815009 | -0.140383619 | 22.7024864  |
| OR2J3:CCDS43433.1   | -1.862778237 | -0.405497196 | 22.70177615 |
| OR51G1:CCDS31366.1  | -1.901342103 | -0.115622982 | 22.69474001 |
| CES5A:CCDS10755.1   | -1.293747493 | 1.078677693  | 22.69259086 |
| RTP4:CCDS33910.1    | -1.872395595 | -0.635550596 | 22.6916379  |
| SYK:CCDS6688.1      | -1.955242984 | 1.16119326   | 22.68326543 |
| GSDMA:CCDS45669.1   | -1.099683355 | 0.91963165   | 22.68143363 |
| SLC30A8:CCDS6322.1  | -1.837132113 | 0.2063761    | 22.67907584 |
| STX11:CCDS5205.1    | -1.564614804 | 0.097656537  | 22.67144326 |
| TRPM2:CCDS13710.1   | -1.583222538 | 2.737313008  | 22.67021506 |
| TPH2:CCDS31859.1    | -1.381865154 | 0.87680475   | 22.66142053 |
| FAM71A:CCDS1507.1   | -1.204454534 | 0.441695691  | 22.65228385 |
| C8orf74:CCDS47800.1 | -1.771897581 | 0.460097153  | 22.64015127 |
| DPPA2:CCDS2956.1    | -1.826816217 | -0.149369577 | 22.62609602 |

## TAUvsControls

|                       |              |              |             |
|-----------------------|--------------|--------------|-------------|
| OR5T1:CCDS31525.1     | -1.845306076 | -0.506916159 | 22.62037208 |
| CHRNA6:CCDS56536.1    | -1.172408714 | 1.973250746  | 22.61917851 |
| HSD3B1:CCDS903.1      | -1.582966423 | 0.793987089  | 22.61637004 |
| OR13C4:CCDS35088.1    | -1.911542955 | -0.655222331 | 22.60170611 |
| TBL1Y:CCDS14779.1     | -1.258247333 | 1.319591835  | 22.5955031  |
| IL5:CCDS4156.1        | -2.211992723 | 0.149999732  | 22.59157156 |
| CLRN3:CCDS7656.1      | -1.829345231 | -0.487759656 | 22.56965933 |
| COL4A3:CCDS42829.1    | -1.625473413 | 2.9651433    | 22.5619374  |
| OLR1:CCDS53746.1      | -1.862493475 | 0.478026106  | 22.5474055  |
| OR4D1:CCDS42365.1     | -1.814678148 | -0.480283768 | 22.54286523 |
| POTEH:CCDS46658.1     | -1.839117634 | 0.847619422  | 22.53611259 |
| NKX2-8:CCDS9660.1     | -1.996230067 | -0.429885478 | 22.52901378 |
| FIGLA:CCDS46320.1     | -1.84655768  | -0.431640606 | 22.51949135 |
| STEAP4:CCDS56494.1    | -1.802081373 | 0.096140725  | 22.51811047 |
| SDS:CCDS9169.1        | -1.208846313 | -0.022176223 | 22.51768155 |
| PTPN20B:CCDS7221.1    | -1.74796433  | 0.88512071   | 22.51598764 |
| C3orf43:CCDS43192.1   | -1.86666283  | -0.524847683 | 22.50743269 |
| HCK:CCDS54453.1       | -1.14455852  | 1.172202481  | 22.50163013 |
| ACCSL:CCDS41636.1     | -1.736898342 | 0.87818221   | 22.48594159 |
| LIPJ:CCDS31240.1      | -1.725836843 | 0.346238852  | 22.48113749 |
| PRDM1:CCDS34505.1     | -1.27447661  | 1.758821223  | 22.46708315 |
| OR2B2:CCDS4641.1      | -1.865957756 | -0.34895388  | 22.46496125 |
| TRIM49:CCDS8287.1     | -1.264684758 | 0.290230276  | 22.45560136 |
| KLK6:CCDS42599.1      | -2.229067108 | -0.339929292 | 22.4552086  |
| TSPY2:CCDS35465.1     | -1.813211792 | -0.074208794 | 22.45053114 |
| KCNK16:CCDS4843.1     | -1.871615491 | -0.106169555 | 22.44837751 |
| KIR3DL2:CCDS12906.1   | -1.746943389 | 0.671285429  | 22.4453366  |
| LILRA5:CCDS46178.1    | -1.863912712 | -0.050220722 | 22.44520116 |
| LRRC10:CCDS31856.1    | -1.869299037 | -0.652129765 | 22.43869976 |
| SOX18:CCDS13552.1     | -1.319137036 | 0.393076843  | 22.43605978 |
| ALOX15B:CCDS32558.1   | -1.093791459 | 1.196048035  | 22.43078287 |
| TREML1:CCDS4851.1     | -1.466599408 | 0.489158478  | 22.42640968 |
| IL4:CCDS4158.1        | -1.985460496 | -0.654608123 | 22.4174631  |
| PTPN20B:CCDS41516.1   | -1.783470549 | -0.052727744 | 22.4166631  |
| HAO2:CCDS901.1        | -1.797193022 | 0.02129112   | 22.40676607 |
| ITGAL:CCDS32433.1     | -0.981542663 | 2.287724645  | 22.39837762 |
| HOXC13:CCDS8865.1     | -1.572315265 | -0.061852867 | 22.38492907 |
| OR4Q3:CCDS32020.1     | -1.852841852 | -0.596213016 | 22.36806469 |
| TMC5:CCDS45431.1      | -1.041721061 | 1.934928282  | 22.36790199 |
| MAGEA9B:CCDS35423.1   | -1.907145339 | -0.522566665 | 22.36323758 |
| C17orf82:CCDS11628.1  | -1.510296688 | -0.518997546 | 22.35911141 |
| CD300C:CCDS11701.1    | -1.915610706 | -0.689926568 | 22.34925725 |
| CD1E:CCDS53390.1      | -1.903436641 | 0.321281632  | 22.34782804 |
| TMEM233:CCDS44995.1   | -1.968289733 | -0.53046667  | 22.32781018 |
| CPXCR1:CCDS14458.1    | -1.870361939 | -0.474506601 | 22.2989838  |
| ATP1B4:CCDS48158.1    | -1.812698184 | 0.482595304  | 22.29528042 |
| RNF133:CCDS5784.1     | -1.291334685 | 0.134777156  | 22.29018822 |
| SERPINA11:CCDS32149.1 | -1.754764812 | 0.138747027  | 22.28607389 |
| HCK:CCDS33460.1       | -1.139118148 | 1.174713168  | 22.28267863 |
| DIO1:CCDS30722.1      | -2.184974266 | -0.250185547 | 22.26324615 |
| OR1J2:CCDS35121.1     | -1.787904913 | -0.414476794 | 22.25994084 |

## TAUvsControls

|                      |              |              |             |
|----------------------|--------------|--------------|-------------|
| HOXD10:CCDS2266.1    | -2.640720079 | 0.355344629  | 22.25426431 |
| OR2A14:CCDS43672.1   | -1.839464428 | -0.458888954 | 22.25174151 |
| OR2AE1:CCDS34696.1   | -1.80504886  | -0.089733407 | 22.2476818  |
| C17orf64:CCDS32698.2 | -1.309062728 | -0.159259999 | 22.23179641 |
| OR2H2:CCDS34365.1    | -1.815910018 | -0.251613637 | 22.2273207  |
| TSSK1B:CCDS4112.1    | -1.859055841 | -0.027415534 | 22.22038322 |
| RRH:CCDS3687.1       | -1.797226748 | 0.171971517  | 22.21694345 |
| TRIM38:CCDS4568.1    | -1.694564473 | 1.322443292  | 22.21642809 |
| PLA2G2A:CCDS201.1    | -2.24858479  | 0.094405343  | 22.19529612 |
| ZNF630:CCDS35237.2   | -1.110653556 | 1.003263374  | 22.19186224 |
| CRYGC:CCDS2379.1     | -2.320803889 | 3.20357411   | 22.18573333 |
| SERPINA6:CCDS9924.1  | -1.795876061 | -0.046908931 | 22.18426111 |
| ZNF630:CCDS55409.1   | -1.115704765 | 0.977669568  | 22.17890953 |
| CD86:CCDS56273.1     | -1.777576816 | 0.164959196  | 22.17353528 |
| CDX2:CCDS9328.1      | -1.761896281 | -0.126316847 | 22.17097382 |
| BHMT2:CCDS4045.1     | -1.406575851 | 0.546858381  | 22.16818092 |
| ARHGEF5:CCDS34771.1  | -1.378894705 | 2.827479583  | 22.16773998 |
| FOXA2:CCDS46585.1    | -1.33020654  | 0.319094862  | 22.16228635 |
| AKAP12:CCDS5230.1    | 1.049020089  | 6.905299696  | 22.15637695 |
| GUCA1C:CCDS2954.1    | -1.911372167 | -0.420641573 | 22.15623983 |
| TREML2:CCDS4853.2    | -1.810012306 | -0.179893859 | 22.15492858 |
| PMFBP1:CCDS32483.1   | -0.961325901 | 2.10593578   | 22.1426917  |
| CRISP2:CCDS4928.1    | -1.852112155 | -0.396438413 | 22.13635575 |
| TNK1:CCDS45602.1     | -0.946883668 | 1.642637834  | 22.1225055  |
| MLKL:CCDS45528.1     | -1.796740076 | -0.080845923 | 22.12023284 |
| ATP1B4:CCDS14598.1   | -1.803507132 | 0.432519946  | 22.11163994 |
| GPA33:CCDS1258.1     | -1.323896121 | 0.442989138  | 22.09891583 |
| CNGB1:CCDS45495.1    | -1.344437228 | 0.635391063  | 22.09340544 |
| SDR9C7:CCDS8926.1    | -1.847237463 | -0.253536002 | 22.09331278 |
| IL19:CCDS1468.1      | -1.836889082 | -0.371623764 | 22.0927445  |
| INADL:CCDS617.2      | -0.789692493 | 3.855842198  | 22.08823131 |
| NKX2-5:CCDS54949.1   | -1.846320913 | -0.670804386 | 22.08536494 |
| KERA:CCDS9037.1      | -1.817444246 | -0.433851772 | 22.07838503 |
| TAS2R9:CCDS8633.1    | -1.931525132 | -0.532846514 | 22.0767596  |
| TMEM202:CCDS32287.1  | -1.935749966 | -0.074239763 | 22.07479215 |
| SNX20:CCDS10745.1    | -2.002096457 | -0.170105389 | 22.06433437 |
| PPARG:CCDS2609.1     | -1.334648562 | 1.040400877  | 22.06329219 |
| OR9K2:CCDS31814.1    | -1.875600151 | -0.602561943 | 22.0490258  |
| ASB4:CCDS5642.1      | -1.808565631 | -0.088566111 | 22.04182634 |
| OR10H4:CCDS32941.1   | -1.820982329 | -0.412720851 | 22.04088264 |
| ITGAL:CCDS45461.1    | -0.969521529 | 2.147735104  | 22.03447343 |
| EOMES:CCDS2646.1     | -1.686179255 | 3.141235993  | 22.02753882 |
| JPH1:CCDS6217.1      | -1.137513215 | 1.399292998  | 22.02603338 |
| KRT83:CCDS8823.1     | -1.499167685 | 1.207793051  | 22.02379297 |
| PNPLA1:CCDS47416.1   | -1.148867365 | 0.658937148  | 22.0222012  |
| DLX1:CCDS2247.2      | -1.662123803 | 2.172636928  | 22.02086986 |
| CUBN:CCDS7113.1      | -0.908438512 | 3.681038292  | 22.01645144 |
| NPBWR1:CCDS6151.1    | -1.813050127 | -0.216991523 | 22.01549507 |
| SLAMF8:CCDS1188.1    | -1.219349211 | 0.072731915  | 22.01261017 |
| FEZF1:CCDS34741.2    | -1.526899707 | 2.057115343  | 22.01189726 |
| HOXD4:CCDS2269.1     | -2.405811905 | 0.963875178  | 22.01029369 |

## TAUvsControls

|                       |              |              |             |
|-----------------------|--------------|--------------|-------------|
| CCDC64B:CCDS45393.1   | -1.42828535  | 1.047955611  | 21.99771547 |
| SYK:CCDS47992.1       | -1.938467686 | 1.080542113  | 21.99400087 |
| MYBPC2:CCDS46152.1    | -1.386017026 | 2.556641588  | 21.99381769 |
| KRTAP10-6:CCDS42959.1 | -1.369045666 | 0.030325797  | 21.992079   |
| OR2A42:CCDS56515.1    | -1.724018975 | 0.237103382  | 21.98496985 |
| MRGPRG:CCDS44520.1    | -1.756262238 | -0.156551563 | 21.98155559 |
| UGT2A1:CCDS3529.1     | -1.838177123 | 0.575305288  | 21.9784655  |
| DLX1:CCDS33328.1      | -1.698375515 | 1.335487675  | 21.97595996 |
| OR4A16:CCDS31499.1    | -1.830008492 | -0.540423682 | 21.9743005  |
| GJA5:CCDS929.1        | -1.244924982 | 0.093190769  | 21.95534107 |
| GJB7:CCDS5008.1       | -1.947904189 | -0.665975779 | 21.95374962 |
| DUXA:CCDS33126.1      | -1.905579767 | -0.645003244 | 21.94881339 |
| ABHD12B:CCDS55916.1   | -1.120794009 | 0.919739666  | 21.93299854 |
| ZDHC23:CCDS33827.1    | -1.91428397  | 0.60638598   | 21.92411631 |
| ACOXL:CCDS46389.1     | -1.055211384 | 0.937583627  | 21.91695582 |
| OR6C76:CCDS31823.1    | -1.869969503 | -0.130711075 | 21.91543475 |
| HCK:CCDS54456.1       | -1.139869668 | 1.087932347  | 21.9150783  |
| KLHL14:CCDS32813.1    | -1.268966692 | 2.122678021  | 21.91274656 |
| C15orf32:CCDS10373.1  | -1.940622144 | -0.798075772 | 21.9098912  |
| USHBP1:CCDS12353.1    | -1.013600384 | 1.160517511  | 21.90181364 |
| OR2AK2:CCDS31102.1    | -1.844826436 | -0.210339878 | 21.89765109 |
| OR6C70:CCDS31825.1    | -1.777519114 | -0.238994625 | 21.89477664 |
| SLC7A9:CCDS12425.1    | -1.085145327 | 0.703826001  | 21.8781382  |
| NLGN4Y:CCDS56619.1    | -0.995641219 | 3.571031824  | 21.86710932 |
| TEX33:CCDS13937.1     | -1.826251736 | -0.257881234 | 21.86449075 |
| PTGS1:CCDS6843.1      | -1.043952951 | 1.871667045  | 21.86394478 |
| SPATA22:CCDS11027.1   | -1.816627182 | 0.707808086  | 21.85974206 |
| CCND2:CCDS8524.1      | 1.061675022  | 4.962310232  | 21.82985767 |
| CACNA1D:CCDS2872.1    | -1.0499409   | 3.623674542  | 21.82784163 |
| ARRDC3:CCDS34202.1    | 1.206877579  | 5.211030506  | 21.82158756 |
| CLEC1B:CCDS41752.1    | -1.745934681 | -0.108625568 | 21.81998364 |
| OR52W1:CCDS31407.1    | -1.856929253 | -0.738202988 | 21.81408856 |
| CTLA4:CCDS2362.1      | -1.880583081 | -0.500914714 | 21.8113718  |
| FABP1:CCDS2001.1      | -1.604247903 | -0.675678923 | 21.80676962 |
| OR51A2:CCDS31368.1    | -1.895739666 | -0.597001465 | 21.7970011  |
| PSMB9:CCDS4759.1      | -1.473566373 | 1.006966881  | 21.7928486  |
| SLC35F2:CCDS41709.1   | -1.345471974 | 1.210230904  | 21.79231277 |
| OR5D18:CCDS31510.1    | -1.824713881 | -0.488985074 | 21.79012932 |
| CXCR1:CCDS2409.1      | -1.773692538 | -0.265038698 | 21.75676038 |
| CALML6:CCDS30566.1    | -1.406466898 | -0.286681308 | 21.75481224 |
| HCK:CCDS54455.1       | -1.133739264 | 1.090584323  | 21.74800682 |
| PRODH2:CCDS12478.1    | -1.102776692 | 0.583308565  | 21.73359568 |
| CACNA1D:CCDS46849.1   | -1.041014147 | 3.55962517   | 21.73286088 |
| PADI4:CCDS180.1       | -1.082816694 | 1.142039651  | 21.72297357 |
| MAGEA8:CCDS14692.1    | -1.815379261 | -0.050699628 | 21.72105083 |
| LY6H:CCDS47926.1      | 1.675668827  | 4.525516035  | 21.70296247 |
| GC:CCDS56332.1        | -1.765180387 | 1.32738069   | 21.69962757 |
| AKAP12:CCDS5229.1     | 1.038169108  | 6.930026545  | 21.68389716 |
| FCAR:CCDS12907.1      | -1.707363988 | 0.622801531  | 21.67947989 |
| SH3GL2:CCDS6483.1     | -1.117939175 | 3.647770279  | 21.67843597 |
| CFB:CCDS4729.1        | -1.273402852 | 2.444056794  | 21.67194192 |

## TAUvsControls

|                      |              |              |             |
|----------------------|--------------|--------------|-------------|
| NR1I2:CCDS2995.1     | -1.379179231 | 0.676030595  | 21.67109392 |
| THEMIS:CCDS55055.1   | -1.160898831 | 0.866492187  | 21.62158528 |
| CACNA1D:CCDS46848.1  | -1.049849252 | 3.598729687  | 21.6132964  |
| WBCSR28:CCDS43597.1  | -1.407460521 | -0.269661054 | 21.60592091 |
| C1orf186:CCDS30995.1 | -1.899895246 | -0.681869985 | 21.6006817  |
| OR2T12:CCDS31110.1   | -1.829224319 | -0.450302201 | 21.59997829 |
| OR52M1:CCDS31353.1   | -1.803151612 | -0.436022549 | 21.5946593  |
| HCK:CCDS54454.1      | -1.118075632 | 1.156867504  | 21.57325127 |
| SERPINB4:CCDS11986.1 | -1.797427516 | 0.247846429  | 21.56204247 |
| P2RY13:CCDS3158.2    | -1.773818856 | 0.039051176  | 21.55804175 |
| RFX8:CCDS46376.1     | -1.692006612 | 0.96968493   | 21.5568611  |
| LRIT2:CCDS31234.1    | -1.090749609 | 0.525015106  | 21.54645132 |
| OR51A4:CCDS31367.1   | -1.922068676 | -0.602392624 | 21.54031638 |
| OR4N2:CCDS32022.1    | -1.856298156 | -0.435417989 | 21.53865341 |
| LRRTM3:CCDS7270.1    | -1.051640159 | 1.66911154   | 21.53315635 |
| ATXN3L:CCDS48080.1   | -1.767692275 | -0.215509003 | 21.53120394 |
| IZUMO1:CCDS12732.1   | -1.495823149 | 0.2791092    | 21.53027888 |
| PRG3:CCDS7954.1      | -1.778055686 | -0.280185733 | 21.52989885 |
| CFHR4:CCDS41451.1    | -1.786796314 | 0.60211998   | 21.51091555 |
| FOXG1:CCDS9636.1     | -1.959156417 | 4.548351311  | 21.50608936 |
| VIT:CCDS54348.1      | -1.891857188 | 1.483130142  | 21.50257572 |
| SSX1:CCDS14290.1     | -1.952064105 | -0.217644861 | 21.49273391 |
| HOXA4:CCDS5405.1     | -2.405298375 | 2.084391541  | 21.49105118 |
| ZDHHC21:CCDS6475.1   | -0.877754474 | 1.321218812  | 21.48400146 |
| OR1K1:CCDS35132.1    | -1.759782272 | -0.233489292 | 21.48270008 |
| KLK8:CCDS12814.1     | -1.603101475 | 0.024284238  | 21.48144491 |
| DAPP1:CCDS47112.1    | -1.711940386 | 0.329345673  | 21.48073304 |
| CD1E:CCDS41420.1     | -1.896579345 | 0.253692593  | 21.46957761 |
| ACOT4:CCDS9817.1     | -1.487367145 | 0.2894074    | 21.46927326 |
| FAM71F1:CCDS5804.1   | -1.177059749 | 0.541959417  | 21.46915515 |
| SAMD9:CCDS34680.1    | -1.101821162 | 1.750465546  | 21.4642365  |
| OR5K3:CCDS33803.1    | -1.807862962 | -0.434014813 | 21.43762428 |
| TRIM14:CCDS6734.1    | -1.163442133 | 0.323505003  | 21.42736305 |
| TNFSF15:CCDS6809.1   | -1.790295074 | -0.208113352 | 21.42525742 |
| NAT8:CCDS1926.1      | -1.932169985 | -0.596117617 | 21.42140822 |
| KLK9:CCDS12816.1     | -1.766222762 | -0.283374327 | 21.41452158 |
| INHBE:CCDS8939.1     | -1.308304083 | 1.727330448  | 21.3999215  |
| CSF2RA:CCDS55359.1   | -0.888889105 | 2.626697247  | 21.3937698  |
| TMEM229B:CCDS9783.1  | -1.463368797 | 1.301813598  | 21.39325042 |
| BHMT2:CCDS54871.1    | -1.416413822 | 0.289316681  | 21.3929701  |
| LEMD1:CCDS55679.1    | -1.02863169  | 2.478655663  | 21.38750328 |
| SLC16A6:CCDS11675.1  | 0.941399504  | 2.735758568  | 21.38699564 |
| FAM78B:CCDS30931.1   | -1.159233033 | 1.123541397  | 21.37853794 |
| LYPD6B:CCDS46423.1   | -1.381174974 | 1.105563173  | 21.37426894 |
| SLC13A5:CCDS45593.1  | -1.514024663 | 1.044308207  | 21.37158645 |
| CXXC11:CCDS42843.1   | -0.985387002 | 0.887611465  | 21.3701181  |
| RNASE9:CCDS32036.1   | -1.82080818  | -0.338408549 | 21.36462087 |
| GAGE13:CCDS48110.1   | -1.389141402 | -0.547513881 | 21.35024816 |
| LILRA5:CCDS46177.1   | -1.792021594 | -0.218732888 | 21.34426824 |
| NEU2:CCDS2501.1      | -1.875484367 | 0.035586525  | 21.34131807 |
| GIP:CCDS11542.1      | -1.78286581  | -0.22442266  | 21.34071281 |

## TAUvsControls

|                      |              |              |             |
|----------------------|--------------|--------------|-------------|
| CHRNA6:CCDS6135.1    | -1.1402807   | 2.300715943  | 21.34070702 |
| KLK7:CCDS12812.1     | -1.871811845 | 0.034924888  | 21.34042688 |
| ANO7:CCDS33423.1     | -1.056376904 | 1.799629115  | 21.33670039 |
| HCLS1:CCDS3003.1     | -1.753932529 | 1.71014548   | 21.33659455 |
| VIT:CCDS54349.1      | -1.903809691 | 1.509618459  | 21.33424796 |
| GPIHBP1:CCDS34954.1  | -1.792677525 | -0.466812535 | 21.33108761 |
| TRIML2:CCDS3850.1    | -1.743969532 | 0.232865443  | 21.32798968 |
| NR1I2:CCDS43136.1    | -1.364279962 | 0.513589493  | 21.30810297 |
| DMRT2:CCDS6444.1     | -1.557004051 | 0.707968725  | 21.30196425 |
| EMX2:CCDS53583.1     | -1.443403489 | 2.100324519  | 21.29676575 |
| OR10A2:CCDS31415.1   | -1.805466392 | -0.603709409 | 21.29208356 |
| PNPLA1:CCDS34438.1   | -1.132729669 | 0.632017837  | 21.28799277 |
| PLA2G12B:CCDS7319.1  | -1.834998963 | -0.569123124 | 21.28632579 |
| IGFBP1:CCDS5504.1    | -1.801114296 | -0.096766225 | 21.28269091 |
| OR4S1:CCDS31488.1    | -1.808703511 | -0.632699992 | 21.28178484 |
| GJA4:CCDS30669.1     | -1.738457817 | -0.087229433 | 21.25507427 |
| SUCNR1:CCDS3162.1    | -1.836850578 | -0.028429176 | 21.23421992 |
| XKR8:CCDS315.1       | -1.326433727 | 0.946963514  | 21.23159346 |
| KCNK17:CCDS47419.1   | -2.005454625 | -0.020335016 | 21.22507089 |
| PSKH2:CCDS6240.1     | -1.794658212 | 0.141060045  | 21.20912695 |
| DAOA:CCDS41905.1     | -1.796660893 | -0.451732303 | 21.20744443 |
| FCAR:CCDS12909.1     | -1.695553631 | 0.419669497  | 21.19757219 |
| OR10A3:CCDS31421.1   | -1.816239533 | -0.554678152 | 21.19533166 |
| OR2Y1:CCDS34323.1    | -1.770503263 | -0.402551202 | 21.18756144 |
| OR52E6:CCDS53597.1   | -1.830273271 | -0.537691917 | 21.18384174 |
| C15orf43:CCDS10115.1 | -1.812370826 | -0.485803628 | 21.17682343 |
| OR2T3:CCDS31117.1    | -1.7909794   | -0.49185258  | 21.17400641 |
| TSPY1:CCDS48205.1    | -1.772828676 | 1.042643161  | 21.17171125 |
| VIT:CCDS54347.1      | -1.905831639 | 1.603281914  | 21.16947778 |
| VIT:CCDS33180.1      | -1.923702359 | 1.694835521  | 21.16792895 |
| MYOT:CCDS4194.1      | -2.408951678 | 0.979762715  | 21.16744179 |
| CD74:CCDS47308.1     | -1.185652127 | 1.954081324  | 21.15473096 |
| SLC22A11:CCDS8074.1  | -1.187323005 | 0.748035073  | 21.15374198 |
| TAAR1:CCDS5158.1     | -1.78891292  | -0.453786981 | 21.14722967 |
| POU1F1:CCDS2919.1    | -1.723440606 | 0.123740875  | 21.1382005  |
| SSX4B:CCDS43935.1    | -1.870400412 | -0.583032156 | 21.12125148 |
| OR12D3:CCDS4658.1    | -1.798129884 | -0.483585949 | 21.11918333 |
| HBE1:CCDS7756.1      | -1.8772124   | -0.639091685 | 21.11771203 |
| SLAMF9:CCDS53392.1   | -1.730562403 | 0.088061719  | 21.11150225 |
| OR2T2:CCDS31116.1    | -1.736165624 | -0.301719487 | 21.08336556 |
| BPIFA2:CCDS13214.1   | -1.718066847 | -0.193207354 | 21.08219022 |
| RNF125:CCDS11902.1   | -2.027691698 | -0.061148154 | 21.08089292 |
| OR52N4:CCDS44528.1   | -1.471653686 | -0.192480902 | 21.07557556 |
| OR10H2:CCDS12333.1   | -1.757813213 | -0.348725295 | 21.07548283 |
| SGSM1:CCDS46675.1    | -1.799436423 | 5.596862141  | 21.07536478 |
| SSX2:CCDS14345.1     | -1.823068375 | -0.03393451  | 21.07219791 |
| KRT15:CCDS11398.1    | -2.184222272 | 0.880861679  | 21.06530148 |
| OR51T1:CCDS31363.1   | -1.731690229 | -0.15473913  | 21.06514109 |
| HTR7:CCDS7408.1      | -2.316260492 | 0.689879214  | 21.06472682 |
| FXVD2:CCDS8386.1     | -1.420357331 | -0.326180844 | 21.06421133 |
| GJC3:CCDS34697.1     | -1.789885477 | -0.427235462 | 21.05097143 |



## TAUvsControls

|                      |              |              |             |
|----------------------|--------------|--------------|-------------|
| LYZL4:CCDS2697.1     | -1.530655787 | -0.17853843  | 21.04941402 |
| P2RY8:CCDS14115.1    | -1.291348972 | 0.674226174  | 21.04572576 |
| B3GNT3:CCDS12364.1   | -1.764422345 | 0.187083923  | 21.04146622 |
| IL24:CCDS53466.1     | -1.872432836 | -0.282905207 | 21.03497411 |
| CSN2:CCDS3532.1      | -1.714052138 | -0.08469279  | 21.02601771 |
| ANKRD7:CCDS43638.1   | -1.826089251 | -0.110348487 | 21.00131954 |
| FBXO4:CCDS3939.1     | -2.062738311 | 0.392618974  | 20.99561157 |
| TMIGD1:CCDS32605.1   | -1.769546931 | -0.19729511  | 20.99535158 |
| TPTE:CCDS13560.2     | -1.122908533 | 1.790545544  | 20.99102104 |
| HAND2:CCDS3819.1     | -2.258216062 | 1.66529471   | 20.98924178 |
| DUSP27:CCDS30932.1   | -2.126400025 | 1.797789961  | 20.98898308 |
| PARP12:CCDS5857.1    | -1.015243598 | 1.896405141  | 20.97358802 |
| NFIL3:CCDS6690.1     | -0.948548263 | 4.098501063  | 20.96752318 |
| IL2RG:CCDS14406.1    | -1.401745414 | 0.337566546  | 20.96015734 |
| PAEP:CCDS35173.1     | -1.782550358 | -0.353281375 | 20.9381497  |
| OR2T5:CCDS31118.1    | -1.810609864 | -0.51662735  | 20.93225645 |
| MC3R:CCDS13449.2     | -1.804584343 | -0.289495088 | 20.93011473 |
| TPTE:CCDS33511.1     | -1.231268898 | 1.61070844   | 20.92946908 |
| EXPH5:CCDS8341.1     | -0.931038599 | 2.212801939  | 20.92140958 |
| C2CD4C:CCDS45890.1   | -1.034123181 | 2.410274355  | 20.91833301 |
| KRT85:CCDS8824.1     | -1.242361474 | 1.13595294   | 20.9126632  |
| RHEBL1:CCDS8778.1    | -2.402697784 | 2.196693028  | 20.90530734 |
| FEZF1:CCDS55157.1    | -1.493252211 | 2.016643857  | 20.88989601 |
| PTGDR:CCDS9707.1     | -1.795678624 | -0.042815026 | 20.88016916 |
| FOXA2:CCDS13147.1    | -1.302366446 | 0.302954102  | 20.87409288 |
| HNF1B:CCDS11324.1    | -1.297416599 | 0.884892858  | 20.87145702 |
| OR8D1:CCDS31706.1    | -1.737483217 | -0.353742591 | 20.86875661 |
| KCNG3:CCDS42674.1    | -1.249055376 | 0.210391106  | 20.86576226 |
| PHYHIP:CCDS43723.1   | -1.537861443 | 3.326278171  | 20.85607418 |
| AP1S3:CCDS42827.1    | -1.946204041 | 0.139240424  | 20.85362848 |
| OR2A2:CCDS43671.1    | -1.854316471 | -0.568940164 | 20.85362815 |
| ZIM3:CCDS33125.1     | -1.786400397 | 0.104794037  | 20.84799686 |
| CCDC42:CCDS54088.1   | -1.363054485 | -0.027408469 | 20.84428638 |
| MYOT:CCDS47268.1     | -2.236070973 | 0.433641179  | 20.83945498 |
| GKN1:CCDS1891.2      | -1.812082465 | -0.34752379  | 20.83628536 |
| SGSM1:CCDS46674.1    | -1.786961164 | 5.605374436  | 20.83592883 |
| DGAT2L6:CCDS14397.1  | -1.484081736 | -0.22086265  | 20.83378446 |
| CCR2:CCDS46813.1     | -1.75298947  | -0.166520697 | 20.83076834 |
| POU4F2:CCDS34074.1   | -1.353359535 | 2.571440082  | 20.83050514 |
| CFC1B:CCDS33286.1    | -1.238047931 | 0.895132108  | 20.8304132  |
| SASH3:CCDS14614.1    | -1.296159261 | 0.406047157  | 20.82990643 |
| FAM78A:CCDS6941.2    | -1.213724217 | 0.607786826  | 20.82843719 |
| TRPC5:CCDS14561.1    | -1.434405331 | 1.491034     | 20.81803518 |
| ZNF43:CCDS12413.2    | -1.13150351  | 3.996052675  | 20.81642946 |
| ASPA:CCDS11028.1     | -1.717810696 | 0.087226131  | 20.81397329 |
| HORMAD2:CCDS46683.1  | -1.807961443 | 0.628509022  | 20.80612211 |
| BBOX1:CCDS7862.1     | -1.390062924 | 1.614917091  | 20.79802721 |
| SLC10A5:CCDS34915.1  | -1.28345814  | -0.013008869 | 20.77690605 |
| SGK1:CCDS47477.1     | -1.21960704  | 4.019667625  | 20.77687857 |
| SSX4B:CCDS35241.1    | -1.819181291 | -0.314670339 | 20.77653372 |
| C1orf204:CCDS44253.1 | -1.34984339  | 0.419105636  | 20.77075956 |

## TAUvsControls

|                     |              |              |             |
|---------------------|--------------|--------------|-------------|
| MAB21L3:CCDS886.1   | -1.762232393 | 0.204572904  | 20.76629215 |
| C10orf82:CCDS7596.1 | -2.223034004 | -0.365600203 | 20.76353467 |
| IL22:CCDS8982.1     | -1.853563579 | -0.335938881 | 20.75118152 |
| FXVD2:CCDS8385.1    | -1.397354316 | -0.334013873 | 20.7473083  |
| PABPC4:CCDS44114.1  | 0.711776648  | 6.836014801  | 20.72376896 |
| OR2M7:CCDS31111.1   | -1.761868695 | -0.321242485 | 20.7228231  |
| CCDC74A:CCDS2167.1  | -1.538900758 | 4.537386771  | 20.71965586 |
| THEMIS:CCDS34534.1  | -1.111766249 | 0.961004512  | 20.71451003 |
| CD84:CCDS53395.1    | -1.820056295 | 0.096193873  | 20.71352779 |
| LEMD1:CCDS30986.1   | -0.999625022 | 1.95675608   | 20.70797986 |
| CYP11A1:CCDS32291.1 | -1.090371383 | 1.018580483  | 20.70124591 |
| NYX:CCDS14256.1     | -1.117254151 | 0.196976078  | 20.6938274  |
| OR6B1:CCDS43667.1   | -1.762518026 | -0.371028703 | 20.6849057  |
| OR10C1:CCDS34364.1  | -1.757891749 | -0.477203137 | 20.68042912 |
| CD200R1:CCDS2970.1  | -1.697921625 | -0.043744509 | 20.67195384 |
| OR4C13:CCDS31495.1  | -1.869242236 | -0.673956668 | 20.6690831  |
| CT45A5:CCDS35406.1  | -1.893220409 | -0.456761305 | 20.6544441  |
| OR5AU1:CCDS32042.1  | -1.795184318 | -0.413417874 | 20.64526529 |
| RSPH6A:CCDS12675.1  | -1.06979213  | 1.293731562  | 20.64042286 |
| TAAR8:CCDS5154.1    | -1.796049019 | -0.446306932 | 20.63820952 |
| TREML4:CCDS34446.1  | -1.82849793  | -0.592868845 | 20.62596922 |
| WNT6:CCDS2425.1     | -1.281297931 | 0.077192598  | 20.62399854 |
| LYG2:CCDS2042.1     | -1.842404154 | -0.789253356 | 20.62376975 |
| CXCL1:CCDS47074.1   | -1.503892788 | -0.373594477 | 20.62229036 |
| ERMN:CCDS42764.1    | -1.286589606 | 0.343203291  | 20.62035692 |
| TAS2R7:CCDS8631.1   | -1.790415261 | -0.591683175 | 20.61312669 |
| FEZF2:CCDS2897.1    | -1.87912     | 4.3866398    | 20.60187281 |
| OR4C15:CCDS31501.1  | -1.736967863 | -0.356502387 | 20.6000619  |
| HBG2:CCDS7755.1     | -1.852308437 | -0.73215639  | 20.59925911 |
| CT45A1:CCDS48174.1  | -1.864203879 | -0.612049966 | 20.59773883 |
| IL19:CCDS1469.1     | -1.802840194 | -0.579919859 | 20.59763141 |
| SULT1C3:CCDS33267.1 | -1.738099024 | 0.044674965  | 20.5972913  |
| CD1E:CCDS53388.1    | -1.88820497  | 0.115419329  | 20.58198071 |
| SGK1:CCDS47478.1    | -1.225634284 | 4.021157687  | 20.57511461 |
| OR52L1:CCDS44529.1  | -1.815333642 | -0.157069012 | 20.56447886 |
| NBAS:CCDS1685.1     | 0.735434533  | 6.35205961   | 20.53785765 |
| OSM:CCDS13873.1     | -1.749765032 | -0.124794492 | 20.53677736 |
| HERC6:CCDS54777.1   | -1.055670749 | 1.859071645  | 20.53287056 |
| CGB2:CCDS12750.2    | -2.604750472 | 1.95474743   | 20.53286506 |
| FCAR:CCDS42625.1    | -1.68364717  | 0.132952591  | 20.53010583 |
| FAM83A:CCDS6340.1   | -1.678475373 | 0.260173203  | 20.52454868 |
| TLR1:CCDS33973.1    | -0.957361844 | 0.80930537   | 20.51179759 |
| ZBED2:CCDS2960.2    | -1.858778391 | -0.702480942 | 20.50257734 |
| KCNA1:CCDS8535.1    | -1.642480359 | 0.630467784  | 20.4870643  |
| PLA2G4F:CCDS32204.1 | -1.610673849 | 2.020643888  | 20.48661789 |
| FGF21:CCDS12734.1   | -1.812717642 | 0.324637399  | 20.4808654  |
| RP1L1:CCDS43708.1   | -0.927708437 | 2.528915652  | 20.48029541 |
| SLC30A8:CCDS55272.1 | -1.855659126 | -0.059201419 | 20.47932185 |
| OR51G2:CCDS31365.1  | -1.804563067 | -0.448973057 | 20.46995614 |
| STEAP3:CCDS2125.1   | -1.419912697 | 1.820627898  | 20.46991736 |
| OR6C65:CCDS31821.1  | -1.807789108 | 0.014504501  | 20.46906753 |

## TAUvsControls

|                        |              |              |             |
|------------------------|--------------|--------------|-------------|
| OPCML:CCDS31722.1      | -1.454624297 | 3.913742199  | 20.46677657 |
| OR9G1:CCDS31536.1      | -1.751748611 | -0.337798951 | 20.46019904 |
| F3:CCDS750.1           | -0.919005327 | 1.64725542   | 20.45801245 |
| DUSP8:CCDS7724.1       | -0.974043709 | 5.288776351  | 20.45030916 |
| PRSS58:CCDS5871.1      | -1.82670654  | -0.515097227 | 20.43861644 |
| SCIN:CCDS47545.1       | -1.466021468 | 1.488070411  | 20.43672206 |
| OR4F16:CCDS41221.1     | -1.377412195 | -0.520910094 | 20.43485024 |
| TEDDM1:CCDS30953.1     | -1.791912131 | -0.601258508 | 20.42412838 |
| SLC5A5:CCDS12368.1     | -1.008243478 | 0.965158058  | 20.41713606 |
| ABRA:CCDS6305.1        | -1.686624698 | 0.126857098  | 20.40710539 |
| MPZL3:CCDS8392.1       | -1.936587455 | 0.337799186  | 20.40469254 |
| OR1C1:CCDS41481.1      | -1.7811285   | -0.357647699 | 20.39107946 |
| PPAP2C:CCDS12023.1     | -1.273852765 | 1.001896502  | 20.38554941 |
| TNFRSF8:CCDS144.1      | -0.938933015 | 1.187400983  | 20.37603093 |
| DMRTA2:CCDS44141.1     | -1.543844115 | 1.662558616  | 20.36587689 |
| MEOX1:CCDS11466.1      | -1.450869719 | 0.83390623   | 20.35778614 |
| HTR2A:CCDS9405.1       | -1.47446479  | 0.538379266  | 20.35307851 |
| FOXD4L3:CCDS43833.1    | -1.413333089 | 0.149824365  | 20.35198016 |
| OR4M2:CCDS32172.1      | -1.734116826 | -0.150379008 | 20.34790457 |
| LPPR4:CCDS53347.1      | -1.469273141 | 3.174362645  | 20.3410276  |
| STEAP3:CCDS42738.1     | -1.409078787 | 1.898549005  | 20.33287377 |
| EBI3:CCDS12123.1       | -1.237195192 | -0.304707716 | 20.33007265 |
| HERC6:CCDS47098.1      | -1.054957399 | 1.911442718  | 20.31292673 |
| OR2W1:CCDS4656.1       | -1.766132777 | -0.366581219 | 20.30845957 |
| GATA1:CCDS14305.1      | -1.161720859 | 0.387407577  | 20.30388999 |
| NCR2:CCDS56428.1       | -1.379800047 | 0.244845173  | 20.29841233 |
| SERPINA5:CCDS9928.1    | -1.533376629 | 0.69312239   | 20.29735899 |
| CGB1:CCDS12751.2       | -2.553420477 | 1.963261603  | 20.29612773 |
| CLEC4A:CCDS8590.1      | -1.084251882 | 0.624029851  | 20.28988589 |
| SLC14A1:CCDS11925.1    | -2.06557366  | 1.345557711  | 20.28385681 |
| AIPL1:CCDS11075.1      | -2.415688236 | 1.699089384  | 20.27976335 |
| IZUMO2:CCDS12792.2     | -1.811089147 | -0.531533002 | 20.27772228 |
| UGT1A3:CCDS2509.1      | -1.112996142 | 0.715002306  | 20.27561463 |
| OR6Q1:CCDS31541.1      | -1.787038608 | -0.389796716 | 20.2730943  |
| OLAH:CCDS7106.1        | -1.720539748 | 0.44754518   | 20.26776086 |
| FGG:CCDS47153.1        | -1.843834399 | 0.663728402  | 20.2647163  |
| DMBT1:CCDS44492.1      | -1.439807358 | 3.794004915  | 20.26418687 |
| SLC35G3:CCDS11293.1    | -1.708476182 | 0.47274982   | 20.26356299 |
| DMBT1:CCDS44490.1      | -1.44102734  | 3.816315655  | 20.26116381 |
| OR13C5:CCDS35091.1     | -1.815592298 | -0.484974433 | 20.24867472 |
| VIL1:CCDS2417.1        | -0.999551346 | 1.531614657  | 20.2369387  |
| ZCCHC16:CCDS35369.1    | -1.753417615 | -0.232654719 | 20.22918938 |
| SPO11:CCDS13456.1      | -1.692524706 | 0.45202438   | 20.22291229 |
| CSN1S1:CCDS47067.1     | -1.699849894 | 0.505930159  | 20.21908974 |
| CALCA:CCDS31432.1      | -2.015763047 | -0.604108698 | 20.21464785 |
| KRTAP10-11:CCDS42962.1 | -1.708960104 | -0.170862523 | 20.20811509 |
| PLIN1:CCDS10353.1      | -1.32306658  | 0.790351964  | 20.1957645  |
| C8orf34:CCDS6203.2     | -1.070811968 | 1.761231595  | 20.18888961 |
| TM4SF4:CCDS46932.1     | -1.832387276 | 0.257798985  | 20.18617849 |
| MS4A12:CCDS53638.1     | -1.843617343 | -0.511713941 | 20.18480836 |
| GKN2:CCDS33215.1       | -1.944303128 | -0.620027969 | 20.17457156 |

## TAUvsControls

|                       |              |              |             |
|-----------------------|--------------|--------------|-------------|
| LDB3:CCDS53549.1      | -1.41550807  | 1.390237409  | 20.17252818 |
| TPTE2:CCDS9285.1      | -1.079592727 | 0.972474713  | 20.15340647 |
| COL17A1:CCDS7554.1    | -1.209351978 | 2.579822636  | 20.1491204  |
| HOXA5:CCDS5406.1      | -2.111516258 | 2.423752857  | 20.14741634 |
| LPPR4:CCDS757.1       | -1.461653865 | 3.287851966  | 20.14230134 |
| PLA2G2F:CCDS204.2     | -1.782682623 | -0.446686731 | 20.1408201  |
| ART4:CCDS8668.1       | -1.755744632 | 0.074537025  | 20.13534282 |
| PSG4:CCDS33039.1      | -1.76582317  | 0.147647951  | 20.12740746 |
| LCN10:CCDS35182.2     | -1.757949134 | -0.107154949 | 20.12330085 |
| TTC22:CCDS598.1       | -1.752505197 | 0.942085688  | 20.11561936 |
| VSX1:CCDS13169.1      | -1.379408461 | -0.016010432 | 20.11408623 |
| OR14A16:CCDS31097.1   | -1.8251874   | -0.616883222 | 20.1059702  |
| OR5M11:CCDS53629.1    | -1.837834286 | -0.669775914 | 20.10565393 |
| GNRHR:CCDS3517.1      | -1.206929052 | 0.152704839  | 20.1043604  |
| PRF1:CCDS7305.1       | -1.188745384 | 0.359012793  | 20.10362846 |
| SERPINB13:CCDS11985.1 | -1.800145422 | 0.418491836  | 20.10075067 |
| GDF3:CCDS8581.1       | -1.49540872  | 0.080295701  | 20.09802246 |
| FCAR:CCDS42622.1      | -1.66664421  | 0.549297913  | 20.08565704 |
| ZNF705A:CCDS31737.1   | -1.770855113 | -0.385391843 | 20.08388031 |
| ATP6V1B1:CCDS1912.1   | -1.623203302 | 4.04091903   | 20.08129665 |
| OR5W2:CCDS31513.1     | -1.850718168 | -0.648279205 | 20.08009056 |
| HTR7:CCDS7409.1       | -2.25974561  | 0.552338244  | 20.06466796 |
| OR4A15:CCDS31500.1    | -1.78559397  | -0.365691119 | 20.04604077 |
| CXCL9:CCDS34014.1     | -1.869399217 | -0.889239829 | 20.04419889 |
| CLIC2:CCDS14767.1     | -1.857339049 | 0.070096585  | 20.03802726 |
| RGN:CCDS14272.1       | -1.355703967 | 0.266903862  | 20.03704774 |
| OR4F5:CCDS30547.1     | -1.740042405 | -0.523198806 | 20.02923061 |
| UGT1A7:CCDS2506.1     | -1.15998375  | 0.580867564  | 20.01721504 |
| OR4B1:CCDS31485.1     | -1.82836995  | -0.750604687 | 20.00762256 |
| XKR3:CCDS42975.1      | -1.70398914  | 0.299514555  | 20.00491709 |
| RNLS:CCDS31239.1      | -1.603473685 | 1.018604654  | 20.00319124 |
| ALPPL2:CCDS2491.1     | -1.022364962 | 0.888834401  | 19.99157884 |
| ACTA1:CCDS1578.1      | -1.823717858 | 4.230110733  | 19.98839593 |
| SOX30:CCDS4339.1      | -0.974572091 | 0.948581766  | 19.9766778  |
| OR6M1:CCDS31696.1     | -1.765033422 | -0.489508637 | 19.96639388 |
| NFATC2:CCDS33488.1    | -1.032098106 | 1.684688953  | 19.96557916 |
| UGT1A8:CCDS33402.1    | -1.128080319 | 0.649714234  | 19.96486001 |
| ADAM18:CCDS55225.1    | -1.734618037 | -0.177674981 | 19.96253637 |
| MAGEA2:CCDS14713.1    | -1.402479856 | -0.065443786 | 19.96061184 |
| SGK1:CCDS5170.1       | -1.207254699 | 4.054346945  | 19.95573771 |
| ALDH3A1:CCDS11212.1   | -1.381856416 | 1.363116277  | 19.9513806  |
| GAGE2B:CCDS48112.1    | -1.541618663 | -0.233159078 | 19.94530192 |
| SH2D4B:CCDS7370.1     | -1.407644431 | 0.85072425   | 19.94076569 |
| SPATA3:CCDS2481.1     | -1.777539584 | -0.325415002 | 19.94063602 |
| THEM5:CCDS1005.1      | -1.93059541  | -0.157597322 | 19.93862281 |
| RFPL4B:CCDS34515.1    | -1.934374731 | -0.283291766 | 19.93322112 |
| LAYN:CCDS31676.1      | -1.75554366  | 2.489997524  | 19.92904807 |
| SGK1:CCDS47476.1      | -1.186259802 | 4.09140168   | 19.92493203 |
| OR5H14:CCDS33798.1    | -1.791664363 | -0.729335157 | 19.92382264 |
| OR14J1:CCDS34362.1    | -1.92134316  | -0.385099594 | 19.9203505  |
| CRISP1:CCDS4932.1     | -1.765775572 | 0.011798098  | 19.909012   |

## TAUvsControls

|                       |              |              |             |
|-----------------------|--------------|--------------|-------------|
| AIPL1:CCDS32540.1     | -2.366854902 | 1.436612695  | 19.90713351 |
| MAGEB16:CCDS43927.1   | -1.77088939  | -0.108032411 | 19.90564521 |
| GABRA1:CCDS4357.1     | -2.584559732 | 1.024349752  | 19.90363534 |
| TEK:CCDS6519.1        | -1.070340819 | 3.214577912  | 19.90167225 |
| FGG:CCDS3788.1        | -1.834217661 | 0.637194068  | 19.89402885 |
| GPR88:CCDS772.1       | -1.475408065 | 0.213315027  | 19.88748847 |
| AGR2:CCDS5364.1       | -1.743314121 | -0.412151099 | 19.88569167 |
| CC2D2B:CCDS41555.1    | -1.232595589 | 0.935243578  | 19.87675851 |
| CHRNA10:CCDS7745.1    | -1.554195843 | 0.680709642  | 19.87479873 |
| JUNB:CCDS12280.1      | -1.158034218 | 3.133484842  | 19.87028424 |
| CLDN7:CCDS54081.1     | -2.093635782 | -0.721095243 | 19.86980978 |
| NFE2:CCDS8876.1       | -1.195216319 | 0.175347478  | 19.86645918 |
| RNF186:CCDS199.1      | -1.768079726 | -0.722627271 | 19.85357875 |
| CYP17A1:CCDS7541.1    | -1.579146414 | 1.453915142  | 19.84526753 |
| OR52B2:CCDS53598.1    | -1.783749898 | -0.516318449 | 19.84103258 |
| SPC24:CCDS45974.1     | 1.258252113  | 3.31138927   | 19.84073474 |
| GBP2:CCDS719.1        | -1.980015117 | 1.541396673  | 19.83739635 |
| HP:CCDS45524.1        | -1.470843683 | 1.248707279  | 19.82974593 |
| GPX3:CCDS43389.1      | -1.363229045 | 3.425155238  | 19.82449588 |
| CLEC4A:CCDS41745.1    | -1.078925195 | 0.399923584  | 19.81753396 |
| OR8H1:CCDS31526.1     | -1.735373156 | -0.465669252 | 19.80877172 |
| AREG:CCDS3565.1       | -1.78647026  | -0.24251787  | 19.7938376  |
| SERPINA7:CCDS14518.1  | -1.67505412  | -0.00889278  | 19.7920617  |
| OR51E1:CCDS31358.2    | -1.742873819 | 0.150676134  | 19.78627042 |
| FOXD4L1:CCDS2117.1    | -1.213977118 | 0.289417854  | 19.78258397 |
| ALOX15B:CCDS11128.1   | -1.09220514  | 1.268146658  | 19.7816339  |
| PRLR:CCDS56358.1      | -1.164738548 | 1.108872336  | 19.77798939 |
| OR5AC2:CCDS33796.1    | -1.749846753 | -0.560526438 | 19.76845156 |
| CC2D2B:CCDS53560.1    | -1.209668131 | 1.299510977  | 19.76690241 |
| FOXB2:CCDS35045.1     | -1.75534382  | 0.791723993  | 19.76559714 |
| GSTA5:CCDS4946.1      | -1.712040215 | -0.13751773  | 19.74871005 |
| MRO:CCDS45869.1       | -1.477998672 | -0.167233043 | 19.74305224 |
| OR1S1:CCDS31546.1     | -1.722694154 | -0.420751571 | 19.73565848 |
| ARRDC5:CCDS45929.1    | -1.67776193  | -0.253020411 | 19.73557858 |
| KRTAP10-5:CCDS42958.1 | -1.738709044 | -0.485768463 | 19.72832182 |
| CSN1S1:CCDS54769.1    | -1.696229438 | 0.411094173  | 19.72804821 |
| CYP2F1:CCDS12572.1    | -0.943122527 | 1.079406827  | 19.71395299 |
| IL12RB1:CCDS54232.1   | -1.053272254 | 1.292353431  | 19.71259736 |
| OR4F6:CCDS32341.1     | -1.745313752 | -0.45106291  | 19.71192342 |
| SSTR3:CCDS13944.1     | -1.253205647 | 0.313149675  | 19.71058648 |
| AMBN:CCDS3543.1       | -1.910181051 | 1.338325512  | 19.70684935 |
| OPALIN:CCDS44466.1    | -1.846298506 | -0.187304503 | 19.70261137 |
| APOL1:CCDS13925.1     | -1.299439201 | 0.916170663  | 19.6978141  |
| HP:CCDS45525.1        | -1.368913409 | 0.808743991  | 19.69518575 |
| GBGT1:CCDS6960.1      | -3.089671104 | 3.618470388  | 19.69202155 |
| TBX20:CCDS43568.1     | -1.253328789 | 0.881936475  | 19.68141691 |
| AMBP:CCDS6800.1       | -1.176236625 | 0.444104336  | 19.67921101 |
| UGT1A6:CCDS2507.1     | -1.160200434 | 0.656837309  | 19.67600587 |
| ARID3C:CCDS35006.1    | -0.997393156 | 0.425376715  | 19.67491423 |
| FMR1NB:CCDS14683.1    | -1.635077429 | 0.167991244  | 19.67487994 |
| CST4:CCDS13159.1      | -2.861139713 | 0.939305865  | 19.67405088 |

## TAUvsControls

|                      |              |              |             |
|----------------------|--------------|--------------|-------------|
| OR6C2:CCDS31824.1    | -1.801028329 | -0.732137728 | 19.66973007 |
| TREM1:CCDS4854.1     | -1.733920626 | -0.091560766 | 19.66326402 |
| PABPC4:CCDS438.1     | 0.701007975  | 6.91207643   | 19.66031889 |
| FAM169B:CCDS45360.1  | -1.832080157 | -0.453163807 | 19.6582754  |
| GATA5:CCDS13499.1    | -1.686576264 | 0.906965898  | 19.65756267 |
| CD1E:CCDS53389.1     | -1.881607171 | 0.036989519  | 19.65282526 |
| OR14I1:CCDS31125.1   | -1.784762595 | -0.526665216 | 19.6407138  |
| LRTM1:CCDS2876.1     | -2.415152987 | 0.590441713  | 19.62760429 |
| CRYBA2:CCDS2429.1    | -2.502165492 | 5.414351577  | 19.62145748 |
| OR13F1:CCDS35087.1   | -1.738595946 | -0.678030757 | 19.61577068 |
| PSG11:CCDS12615.2    | -1.814557852 | -0.151475959 | 19.61219108 |
| OR2A1:CCDS43673.1    | -1.647353352 | 0.353509577  | 19.59842718 |
| FCAR:CCDS42623.1     | -1.652208213 | 0.33469669   | 19.5939302  |
| SAA2:CCDS7833.1      | -1.805689813 | -0.250320908 | 19.5927123  |
| OR1G1:CCDS11020.1    | -1.747352238 | -0.446678214 | 19.58762743 |
| MYH15:CCDS43127.1    | -0.843512542 | 3.07728447   | 19.58364644 |
| NRG2:CCDS4217.1      | -1.072504708 | 2.464338086  | 19.5660093  |
| NFATC2:CCDS46614.1   | -1.034990891 | 1.651755109  | 19.56384314 |
| MGLL:CCDS46902.1     | -1.272426664 | 3.01040645   | 19.56379692 |
| CD3D:CCDS8394.1      | -1.777836471 | -0.336237982 | 19.55136329 |
| SLC34A2:CCDS3435.1   | -1.727456084 | 1.507966612  | 19.54054096 |
| HTR7:CCDS7410.1      | -2.23819465  | 0.463329487  | 19.53843813 |
| PRAME:CCDS13801.1    | -1.110366204 | 0.947776609  | 19.52962445 |
| OR51D1:CCDS31357.1   | -1.699220941 | -0.445877444 | 19.52925389 |
| AVPR1B:CCDS30994.1   | -1.678175171 | 0.414343635  | 19.48740661 |
| TMEM174:CCDS4018.1   | -1.771706553 | -0.611970533 | 19.47741646 |
| TM4SF18:CCDS3142.1   | -1.819860153 | -0.244707086 | 19.4718793  |
| RGS6:CCDS9808.1      | -0.995686157 | 2.344264439  | 19.4709021  |
| MAGEC2:CCDS14678.1   | -1.741395514 | -0.264263738 | 19.46594328 |
| OR2A4:CCDS5149.1     | -1.749877788 | -0.674080576 | 19.46129504 |
| PABPC4:CCDS44115.1   | 0.698946519  | 6.920569087  | 19.46011216 |
| HFE:CCDS4578.1       | -1.526460875 | 1.369442168  | 19.45680838 |
| ADAM28:CCDS34865.1   | -1.865254177 | 2.298316992  | 19.45485646 |
| IPO5:CCDS31999.1     | 0.723226852  | 7.514482513  | 19.4511438  |
| SLC34A2:CCDS54750.1  | -1.721961628 | 1.504207367  | 19.4488713  |
| RIPPLY1:CCDS48145.1  | -1.804239429 | -0.160221418 | 19.43799267 |
| C11orf40:CCDS31354.1 | -1.792962647 | -0.337591052 | 19.43081073 |
| OR4C11:CCDS31503.1   | -1.820864534 | -0.67896479  | 19.42944795 |
| SLC14A1:CCDS45860.1  | -2.043010407 | 1.642884597  | 19.42342538 |
| IGJ:CCDS3545.1       | -1.778110461 | -0.411883452 | 19.41684438 |
| RANBP3L:CCDS54843.1  | -1.974834097 | 1.559174784  | 19.41571216 |
| OR2T10:CCDS31121.1   | -1.717337138 | -0.418641034 | 19.40271427 |
| KIR3DL3:CCDS12903.1  | -1.670357296 | 1.15913987   | 19.37640786 |
| JPH3:CCDS10962.1     | -1.027142074 | 4.266925931  | 19.36878908 |
| TMPRSS12:CCDS44881.1 | -1.7119633   | 0.149809626  | 19.36217494 |
| IGSF10:CCDS3160.1    | -0.965246296 | 2.966817368  | 19.36115226 |
| ENPP7:CCDS11763.1    | -1.761139017 | 0.649140665  | 19.3560845  |
| XCR1:CCDS2736.1      | -1.73998164  | -0.195479484 | 19.35356917 |
| OR11H12:CCDS32017.1  | -1.720560137 | -0.696890231 | 19.34648063 |
| MS4A3:CCDS31567.1    | -1.898950741 | -0.264178133 | 19.33762432 |
| OR2B3:CCDS34358.1    | -1.772694116 | -0.709384629 | 19.31829956 |

## TAUvsControls

|                     |              |              |             |
|---------------------|--------------|--------------|-------------|
| SLC52A1:CCDS11066.1 | -1.195382622 | 0.396392602  | 19.31646702 |
| C1QC:CCDS227.1      | -1.70179424  | -0.452695132 | 19.31207967 |
| OR51F2:CCDS31361.1  | -1.76558432  | -0.614815391 | 19.31201957 |
| GPR6:CCDS5079.1     | -1.870586505 | 0.837678066  | 19.3090492  |
| C1orf116:CCDS1475.1 | -1.0605603   | 0.996422899  | 19.3051224  |
| MGLL:CCDS43148.1    | -1.255613632 | 2.934804298  | 19.30059348 |
| MRO:CCDS45868.1     | -1.217269573 | 0.222124698  | 19.28606296 |
| SH3TC1:CCDS3399.1   | -1.085291711 | 2.76616376   | 19.28165386 |
| FPR2:CCDS12840.1    | -1.730362123 | -0.264766209 | 19.27498591 |
| OR5D16:CCDS31512.1  | -1.750231859 | -0.382661288 | 19.25963965 |
| SLC47A1:CCDS11209.1 | -1.424513113 | 2.127458933  | 19.25212519 |
| DACT2:CCDS47519.1   | -1.492183026 | 2.096134895  | 19.24794888 |
| SEC14L3:CCDS13877.1 | -1.429578492 | 1.183870279  | 19.24733865 |
| HRH1:CCDS2604.1     | -1.148956568 | 1.052354333  | 19.24523005 |
| GPR12:CCDS9319.1    | -1.536180429 | 1.739827928  | 19.23911203 |
| ODAM:CCDS3536.2     | -1.706344918 | 0.509009713  | 19.23171393 |
| PPARG:CCDS2610.2    | -1.279596652 | 0.886858398  | 19.22948701 |
| C3orf67:CCDS33776.1 | -1.12153656  | 1.375984676  | 19.20930276 |
| OR4D10:CCDS53636.1  | -1.747638494 | -0.413614305 | 19.20759874 |
| COL10A1:CCDS5105.1  | -1.831381606 | 0.95368859   | 19.20264418 |
| GPR113:CCDS46239.1  | -1.085418427 | 2.07735732   | 19.19938011 |
| R3HDML:CCDS13329.1  | -1.8085521   | -0.671686225 | 19.19709689 |
| MPPED1:CCDS46723.1  | -1.792885595 | 3.212688358  | 19.18926034 |
| KLK10:CCDS12817.1   | -1.450823881 | 0.046434191  | 19.18322791 |
| CD300A:CCDS32720.1  | -1.829327312 | 0.546004109  | 19.17725928 |
| PSMA8:CCDS32808.1   | -1.741010374 | -0.394215563 | 19.17705107 |
| RBMXL2:CCDS7777.1   | -1.70357959  | 0.187983979  | 19.17641442 |
| C3:CCDS32883.1      | -1.748863961 | 5.830071518  | 19.17517428 |
| LDB3:CCDS44450.1    | -1.387376723 | 1.181410622  | 19.17147953 |
| ZBPB:CCDS5509.1     | -1.78251329  | 0.227171076  | 19.16862648 |
| MGEA5:CCDS7520.1    | 0.749804586  | 6.064500124  | 19.16514235 |
| IDO1:CCDS47847.1    | -1.813376233 | 0.503517893  | 19.1541572  |
| CHMP3:CCDS33236.1   | 0.756223469  | 4.812982676  | 19.15351942 |
| CPN2:CCDS33920.1    | -1.654588967 | 0.578394872  | 19.15227372 |
| ALDH1A1:CCDS6644.1  | -1.634783748 | 3.4445993    | 19.15010668 |
| MS4A4A:CCDS7982.1   | -1.784135643 | 0.119030811  | 19.14173925 |
| PSMA8:CCDS45843.1   | -1.775653471 | -0.599350308 | 19.13791179 |
| MAGEA3:CCDS14715.1  | -1.668789532 | -0.342020575 | 19.13044955 |
| BRIP1:CCDS11631.1   | -1.270290645 | 3.177042176  | 19.12821463 |
| PRR23C:CCDS46924.1  | -1.753319568 | -0.575992318 | 19.12687409 |
| CSTL1:CCDS13153.1   | -1.848877283 | -0.892645444 | 19.12447451 |
| FGA:CCDS3787.1      | -1.811090332 | 1.286268285  | 19.11779776 |
| SPO11:CCDS13457.1   | -1.665943571 | 0.358661035  | 19.10562224 |
| PTPN6:CCDS41744.1   | -1.002947252 | 1.528898785  | 19.09708848 |
| CCDC106:CCDS33118.1 | -0.67771639  | 4.888080804  | 19.0955753  |
| LCP2:CCDS47339.1    | -0.900346698 | 1.500090289  | 19.09343375 |
| RANBP3L:CCDS3918.1  | -1.956163165 | 1.506699776  | 19.08555305 |
| CNR2:CCDS245.1      | -1.72001757  | -0.299059084 | 19.08491843 |
| PLEK2:CCDS9782.1    | -1.259596248 | 0.611968157  | 19.0798206  |
| OR2AG2:CCDS31413.1  | -1.758776777 | -0.670451243 | 19.07603673 |
| APOL1:CCDS13926.1   | -1.264779346 | 0.798524223  | 19.07099545 |

## TAUvsControls

|                      |              |              |             |
|----------------------|--------------|--------------|-------------|
| PSMA8:CCDS45842.1    | -1.738073173 | -0.425278601 | 19.05685877 |
| OR4K13:CCDS32028.1   | -1.746057753 | -0.573941894 | 19.05622892 |
| VSTM5:CCDS44709.1    | -1.706619199 | -0.505561075 | 19.05202194 |
| SMPDL3B:CCDS30656.1  | -1.158923851 | 1.054028277  | 19.05132109 |
| ACCS:CCDS7907.1      | -2.443549554 | 1.152567307  | 19.03976344 |
| ABCA10:CCDS11684.1   | -1.013857568 | 2.304443264  | 19.02108328 |
| C7orf71:CCDS47565.1  | -1.817550017 | -0.691920767 | 19.01766753 |
| TNFSF18:CCDS1305.2   | -1.793754921 | -0.490273594 | 19.01247127 |
| OR10AG1:CCDS31514.1  | -1.78085131  | -0.810836433 | 19.0090383  |
| CST6:CCDS8126.1      | -1.793362783 | -0.610333541 | 19.00214002 |
| OR6S1:CCDS32038.1    | -1.750889709 | -0.566240887 | 18.99957797 |
| GLRX:CCDS4078.1      | -1.060662872 | 2.639010993  | 18.99524585 |
| NCR2:CCDS56429.1     | -1.354198385 | 0.181271793  | 18.9922531  |
| LTA:CCDS4701.1       | -1.254385753 | -0.525456898 | 18.9916238  |
| AMN:CCDS9977.1       | -1.015998652 | 0.782589231  | 18.98858773 |
| SLAMF6:CCDS53393.1   | -1.79870726  | -0.290833725 | 18.98249624 |
| RNASEH2B:CCDS45047.1 | -1.123019666 | 2.350492255  | 18.97448167 |
| MUC15:CCDS44557.1    | -1.673963044 | 0.135290014  | 18.95991258 |
| OR2T27:CCDS31124.1   | -1.729756389 | -0.581228313 | 18.95847525 |
| EXOC3L2:CCDS12657.1  | -1.02719266  | 1.16349973   | 18.95805622 |
| OR10A4:CCDS7774.1    | -1.723622541 | -0.13991283  | 18.94708339 |
| OVOL2:CCDS13132.1    | -1.662597706 | -0.044899003 | 18.94586268 |
| FCGR3A:CCDS44266.1   | -1.673044596 | -0.016344291 | 18.94377868 |
| MS4A15:CCDS7991.1    | -1.745892983 | -0.623766514 | 18.94079068 |
| OBP2B:CCDS6961.1     | -3.534022714 | 3.478420163  | 18.93996267 |
| HMBOX1:CCDS6071.1    | 1.121870232  | 2.601608764  | 18.93885796 |
| PFDN4:CCDS13445.1    | -1.042799614 | 2.989639403  | 18.92964719 |
| LEFTY1:CCDS1548.1    | -1.070215247 | 0.487742663  | 18.92267739 |
| LYPD1:CCDS46416.1    | -1.170410857 | 4.070907887  | 18.92192428 |
| CLEC7A:CCDS41753.1   | -1.731310008 | 0.294764708  | 18.91395895 |
| IFNG:CCDS8980.1      | -1.82578151  | -0.55337771  | 18.91077171 |
| CLEC4A:CCDS8592.1    | -1.148080047 | 0.222647438  | 18.90873567 |
| DMRT2:CCDS6445.1     | -1.380340924 | -0.32449611  | 18.90041125 |
| GC:CCDS3550.1        | -1.682790245 | 1.125407085  | 18.89815143 |
| OR10G3:CCDS32046.1   | -1.716243651 | -0.510689092 | 18.89557805 |
| TFAP2C:CCDS13454.1   | -1.918276486 | 2.146963436  | 18.88156978 |
| MAGEB4:CCDS14221.1   | -1.665894449 | -0.280416163 | 18.87826299 |
| KLRF1:CCDS41750.1    | -1.721759561 | -0.025943079 | 18.87154177 |
| P2RY4:CCDS14398.1    | -1.351806957 | -0.223448844 | 18.86646101 |
| RGS1:CCDS1375.2      | -1.688670149 | -0.558176832 | 18.86427757 |
| OR52H1:CCDS31386.1   | -1.751655921 | -0.45172229  | 18.86051882 |
| ZPBP:CCDS55110.1     | -1.772900876 | 0.219694031  | 18.85644608 |
| ZNF645:CCDS14205.1   | -1.824530277 | 0.638831263  | 18.85494729 |
| NEDD9:CCDS34340.1    | -0.770361619 | 2.077127196  | 18.85286622 |
| PTGIR:CCDS12686.1    | -1.212473759 | 1.044054275  | 18.84821562 |
| CCL15:CCDS11304.1    | -1.816814684 | -0.854734514 | 18.84733081 |
| IL15RA:CCDS7074.1    | -1.239553861 | 0.717422346  | 18.84477546 |
| OR6C1:CCDS31818.1    | -1.689273627 | -0.469072814 | 18.84082746 |
| CILP:CCDS10203.1     | -1.389040609 | 2.53872967   | 18.84019945 |
| DNAJC5B:CCDS6183.1   | -1.709648905 | -0.356224084 | 18.82852308 |
| CHRNA2:CCDS6059.1    | -2.204505866 | 1.224934917  | 18.82536883 |



## TAUvsControls

|                      |              |              |             |
|----------------------|--------------|--------------|-------------|
| OPCML:CCDS8492.1     | -1.387044345 | 3.986265633  | 18.82502378 |
| LRR30:CCDS42409.1    | -1.888302038 | -0.059490459 | 18.81515999 |
| OR6B2:CCDS46559.1    | -1.6987435   | -0.341386768 | 18.81445254 |
| LDB3:CCDS41545.1     | -1.390667122 | 1.209624229  | 18.81158224 |
| PTGER2:CCDS9708.1    | -1.444918565 | 0.245756903  | 18.79799881 |
| GNMB:CCDS34610.1     | -1.219262902 | 3.964840817  | 18.7932985  |
| CBX5:CCDS8875.1      | 1.084966298  | 4.414332912  | 18.79297068 |
| ATP2B4:CCDS30977.1   | 0.751817621  | 6.256936159  | 18.79076629 |
| GNMB:CCDS5380.1      | -1.220030829 | 3.96204054   | 18.78851148 |
| PLEKHB1:CCDS44673.1  | -1.101689504 | 2.561230802  | 18.78549589 |
| SPATA22:CCDS54067.1  | -1.747323379 | 0.456841692  | 18.77846613 |
| ASB14:CCDS46856.2    | -0.919899506 | 0.852995308  | 18.77748023 |
| MAGEA2B:CCDS44016.1  | -1.358341037 | -0.050266525 | 18.77364637 |
| AICDA:CCDS41747.1    | -1.752680795 | -0.719551579 | 18.77035654 |
| SIRPA:CCDS13022.1    | -0.918433691 | 3.813441218  | 18.76583119 |
| FCAR:CCDS46180.1     | -1.635268629 | 0.418659205  | 18.75927804 |
| RTL1:CCDS53910.1     | -0.835207462 | 2.532197963  | 18.7587702  |
| MGEA5:CCDS44471.1    | 0.738282224  | 5.975186193  | 18.75353155 |
| GIMAP1:CCDS5906.1    | -1.728397038 | -0.325513848 | 18.75109495 |
| GLB1L3:CCDS44780.1   | -1.153298817 | 1.411370968  | 18.72246432 |
| VENTX:CCDS7675.1     | -1.779959794 | -0.43121996  | 18.70910171 |
| TAAR5:CCDS5156.1     | -1.679270263 | -0.303040919 | 18.7072714  |
| C9orf131:CCDS47961.1 | -0.928472163 | 1.435507788  | 18.70515088 |
| TNMD:CCDS14469.1     | -1.442708841 | 1.798708898  | 18.70473194 |
| TBX10:CCDS31621.1    | -1.11600077  | 0.457232346  | 18.69395075 |
| UGT2B7:CCDS3526.1    | -1.08599348  | 0.842746578  | 18.69162696 |
| OR4D9:CCDS31564.1    | -1.743905302 | -0.662066284 | 18.6876572  |
| CXCL14:CCDS4188.1    | -1.281352738 | 2.605438323  | 18.68598049 |
| SLC5A7:CCDS2074.1    | -1.287560847 | 0.983713437  | 18.67738459 |
| TMEM82:CCDS30608.1   | -1.162908671 | -0.126204119 | 18.67119511 |
| SH2D4B:CCDS44449.1   | -1.400124157 | 0.810194785  | 18.66737568 |
| PRSS1:CCDS5872.1     | -1.621200458 | 0.622926273  | 18.65794296 |
| OR13C3:CCDS35089.1   | -1.735635435 | -0.529584716 | 18.63162066 |
| VGLL2:CCDS5114.1     | -2.468526064 | -0.322278248 | 18.62782799 |
| PLAUR:CCDS33042.1    | -1.42419956  | 3.107073575  | 18.62577968 |
| SLC13A5:CCDS11079.1  | -1.390543395 | 1.155315213  | 18.61550156 |
| NR1I2:CCDS54627.1    | -1.295878819 | 0.416795904  | 18.61047312 |
| C16orf74:CCDS45540.1 | -1.229794471 | 0.64082079   | 18.60508898 |
| AIPL1:CCDS32539.1    | -2.300251067 | 1.444757404  | 18.60394157 |
| GLT6D1:CCDS43900.1   | -1.724215312 | -0.547830208 | 18.60089442 |
| MED14:CCDS14254.1    | 0.785067797  | 5.590096343  | 18.58703477 |
| NXPH1:CCDS47540.1    | -1.203284556 | 1.23917407   | 18.58664586 |
| MYL10:CCDS34713.1    | -1.169510947 | 0.281677764  | 18.58612372 |
| DDI1:CCDS31660.1     | -1.05258702  | 0.306756484  | 18.58600349 |
| PLAUR:CCDS33041.1    | -1.43772864  | 3.085074649  | 18.57803388 |
| OR5AP2:CCDS31534.1   | -1.734719283 | -0.422673207 | 18.57586864 |
| REG3A:CCDS1965.1     | -1.720110983 | -0.58946495  | 18.56270542 |
| C11orf53:CCDS31674.1 | -1.775153214 | -0.64086593  | 18.55106655 |
| OR10G4:CCDS31702.1   | -1.775218627 | -0.307910902 | 18.5503866  |
| SLC26A9:CCDS30989.1  | -0.884161969 | 1.624055597  | 18.54382687 |
| IL22RA2:CCDS5183.1   | -1.776734108 | -0.511125049 | 18.53672958 |

## TAUvsControls

|                      |              |              |             |
|----------------------|--------------|--------------|-------------|
| ARHGEF15:CCDS11139.1 | -1.067391547 | 1.593671725  | 18.53061485 |
| PRR25:CCDS45372.1    | -1.072397454 | -0.213762369 | 18.52278668 |
| OR5H1:CCDS33797.1    | -1.74366764  | -0.609307331 | 18.50949634 |
| RAMP1:CCDS2522.1     | -1.899732076 | 1.068331657  | 18.50679522 |
| LYZL2:CCDS7167.2     | -1.751350477 | -0.640878368 | 18.49552963 |
| GP5:CCDS3307.1       | -1.156150967 | 0.189190551  | 18.47905105 |
| ACTC1:CCDS10041.1    | -2.249604128 | 5.741995266  | 18.4760347  |
| DSCAM:CCDS42929.1    | -0.960767299 | 4.132887519  | 18.47596915 |
| B3GAT1:CCDS8500.1    | -1.099708179 | 5.195164358  | 18.47583532 |
| SLC18A2:CCDS7599.1   | -1.738105567 | 2.567433049  | 18.47470156 |
| OR10T2:CCDS30895.1   | -1.67272408  | -0.599767279 | 18.47075233 |
| OR10J5:CCDS30910.1   | -1.695685262 | -0.482273398 | 18.47030543 |
| RASGRP4:CCDS46068.1  | -1.01937487  | 1.718460683  | 18.4671553  |
| CER1:CCDS6476.1      | -1.72604192  | -0.39509203  | 18.46185093 |
| CD74:CCDS47309.1     | -1.151756612 | 2.272597484  | 18.45470188 |
| S100A16:CCDS1045.1   | -1.406184879 | 2.98616512   | 18.45099942 |
| SCG2:CCDS2457.1      | -1.221281688 | 6.770505635  | 18.44490676 |
| C5orf63:CCDS54896.1  | -1.806183326 | -0.957374415 | 18.44094865 |
| KIF13A:CCDS54968.1   | 0.686280969  | 5.302136902  | 18.43968972 |
| C11orf45:CCDS8478.1  | -1.358205269 | 0.031072444  | 18.42674369 |
| ITGB2:CCDS13716.1    | -0.928923354 | 1.679936246  | 18.42628435 |
| HLA-DQB2:CCDS56419.1 | -1.68036612  | -0.03319357  | 18.42446583 |
| F2RL3:CCDS12350.1    | -1.322105983 | -0.219877487 | 18.42288111 |
| OR6X1:CCDS31695.1    | -1.667565319 | -0.506117826 | 18.42147848 |
| C3orf17:CCDS33824.1  | 0.67714355   | 3.402593756  | 18.41795152 |
| SPNS3:CCDS11045.1    | -1.038161518 | 0.842195754  | 18.41549582 |
| TNNT2:CCDS30969.1    | -2.640291697 | 3.905120171  | 18.41316554 |
| PLAUR:CCDS12628.1    | -1.408058725 | 3.32731248   | 18.41107814 |
| UGT2A2:CCDS56331.1   | -1.707895727 | 0.510454088  | 18.40593314 |
| ANKRD2:CCDS44468.1   | -0.986206886 | 0.459421759  | 18.40356234 |
| GRIK3:CCDS416.1      | -1.238046524 | 4.494811278  | 18.40190631 |
| SLC26A4:CCDS5746.1   | -1.101355181 | 1.455443064  | 18.39406663 |
| GJD2:CCDS10040.1     | -1.293915543 | 2.386614342  | 18.39380574 |
| ALLC:CCDS46223.1     | -1.037355239 | 0.408932494  | 18.38661469 |
| TEX15:CCDS6080.1     | -1.065459535 | 2.584575264  | 18.38508165 |
| FABP7:CCDS5127.1     | -1.275683679 | 6.515555591  | 18.38279301 |
| OR10J3:CCDS30909.1   | -1.7419605   | -0.554959656 | 18.38163997 |
| CAD:CCDS1742.1       | 0.74865028   | 7.265982389  | 18.37052973 |
| PPAP2C:CCDS45889.1   | -1.307515797 | 0.653205725  | 18.36858454 |
| EFNA3:CCDS1090.1     | -0.904133545 | 4.141755161  | 18.36108028 |
| ADORA3:CCDS839.1     | -1.691512206 | -0.142515765 | 18.35769515 |
| FBXO4:CCDS3938.1     | -1.490911385 | 0.806269688  | 18.35010133 |
| MS4A3:CCDS31568.1    | -1.932022674 | -0.57647313  | 18.34597293 |
| LYPD1:CCDS42759.1    | -1.182996317 | 4.776645566  | 18.34575896 |
| TNNT2:CCDS30968.1    | -2.622803164 | 3.832103525  | 18.33851465 |
| FTCD:CCDS13731.1     | -1.020158826 | 1.50251125   | 18.3383413  |
| SP7:CCDS44897.1      | -1.038685263 | 0.226506465  | 18.32194207 |
| CATSPER4:CCDS30645.1 | -0.949574679 | 0.722478731  | 18.32088604 |
| C9orf131:CCDS47962.1 | -0.907218976 | 1.343987016  | 18.31558078 |
| TAS2R16:CCDS5785.1   | -1.703583797 | -0.572669485 | 18.31475559 |
| SIRPB1:CCDS13019.1   | -1.096412963 | 0.675855237  | 18.30986289 |

## TAUvsControls

|                      |              |              |             |
|----------------------|--------------|--------------|-------------|
| HFE:CCDS47387.1      | -1.509395574 | 1.326954486  | 18.30689524 |
| ESPNL:CCDS2525.1     | -0.93815828  | 1.493831546  | 18.30290763 |
| MYBPHL:CCDS30793.1   | -1.595575586 | 0.608932371  | 18.29591482 |
| HFE:CCDS54974.1      | -1.496941853 | 1.298251856  | 18.28818419 |
| RGS6:CCDS55925.1     | -0.961677224 | 2.380485169  | 18.28309461 |
| LGALS9B:CCDS42283.1  | -1.179193582 | 0.261159552  | 18.27022527 |
| KCNA6:CCDS8534.1     | -0.930334181 | 2.803727202  | 18.26308852 |
| OR4F17:CCDS32854.1   | -1.668893447 | -0.481270834 | 18.26186655 |
| RGS6:CCDS55924.1     | -0.962388751 | 2.459071594  | 18.26173666 |
| KCNC2:CCDS9007.1     | -1.01287621  | 1.531851923  | 18.26024094 |
| PCDH18:CCDS34064.1   | 1.174783551  | 5.375093752  | 18.25014733 |
| CLEC4A:CCDS8591.1    | -1.159047166 | -0.083404662 | 18.23849958 |
| SLC7A13:CCDS34917.1  | -1.658849342 | 0.064498745  | 18.23497269 |
| PRB2:CCDS41757.2     | -1.75164647  | -0.226164149 | 18.23370111 |
| ALOX15:CCDS11049.1   | -0.813724074 | 1.51043899   | 18.22999105 |
| FAM46D:CCDS14446.1   | -1.693179992 | -0.257978685 | 18.22787641 |
| ATP2B4:CCDS1440.1    | 0.746681869  | 6.240908528  | 18.22123504 |
| GPR65:CCDS9879.1     | -1.697337831 | -0.397576094 | 18.21394873 |
| TMEM207:CCDS3297.1   | -1.83561575  | -0.925112205 | 18.20248601 |
| SDR42E1:CCDS42205.1  | -1.699635352 | 0.638936784  | 18.18412829 |
| GPR31:CCDS5299.1     | -1.674969225 | -0.455228972 | 18.16685258 |
| KIF13A:CCDS54967.1   | 0.6808812    | 5.278644022  | 18.1638375  |
| PLXNA4:CCDS43646.1   | -0.901475158 | 5.380952273  | 18.15464616 |
| ERMN:CCDS46431.1     | -1.256905255 | 0.096085759  | 18.15458457 |
| PDIA6:CCDS1675.1     | 0.752229063  | 7.459192627  | 18.14485494 |
| HRH4:CCDS11887.1     | -1.580106056 | 0.549484374  | 18.14301397 |
| PRR18:CCDS5291.1     | -1.479636241 | -0.28463258  | 18.12225204 |
| KCNK16:CCDS47420.1   | -1.713240459 | -0.309157329 | 18.10533418 |
| OR13C9:CCDS35093.1   | -1.747268231 | -0.679791099 | 18.08716956 |
| SP140:CCDS42831.1    | -0.939738492 | 2.378992997  | 18.08251661 |
| TBC1D2:CCDS35080.1   | -0.758849798 | 2.593787187  | 18.07729249 |
| BIRC3:CCDS8315.1     | -1.095968861 | 0.781111208  | 18.06515626 |
| DDHD2:CCDS34883.1    | 0.784814438  | 5.043482454  | 18.05935837 |
| MYOZ2:CCDS3711.1     | -2.358462056 | 0.494471851  | 18.05832658 |
| CARD16:CCDS31661.1   | -1.745643406 | -0.297355661 | 18.05483404 |
| MC5R:CCDS11868.1     | -1.358981333 | -0.288142981 | 18.02837831 |
| AGAP3:CCDS55185.1    | -0.842771121 | 6.264344207  | 18.01556787 |
| PTPLAD2:CCDS43791.1  | -1.665557194 | -0.180355679 | 18.0151268  |
| HSD17B13:CCDS47097.1 | -1.253373061 | -0.016530907 | 18.01375124 |
| FBXO32:CCDS6345.1    | -1.123511933 | 2.544302733  | 18.00866846 |
| HOXD3:CCDS2270.1     | -1.988584604 | 1.50292581   | 18.00101262 |
| MYZAP:CCDS10162.1    | -1.437929396 | 1.627105107  | 17.99969073 |
| PSG8:CCDS46090.1     | -1.731987687 | 0.040739867  | 17.99350486 |
| CTRC:CCDS156.1       | -1.168252699 | -0.160360714 | 17.98818804 |
| MSLN:CCDS32356.1     | -0.870842959 | 1.725340916  | 17.97945846 |
| CAPN12:CCDS12519.1   | -0.989604465 | 1.298187011  | 17.97789831 |
| OR56B4:CCDS31406.1   | -1.314679822 | -0.436004084 | 17.97480744 |
| GSG1:CCDS55807.1     | -0.905244478 | 1.775263215  | 17.96948996 |
| OR7C2:CCDS12320.1    | -1.365533767 | -0.53210768  | 17.96904163 |
| ZSWIM2:CCDS33348.1   | -1.148105356 | 0.631726554  | 17.96797593 |
| NAP1L1:CCDS9013.1    | 1.011235454  | 8.153577391  | 17.96273411 |

## TAUvsControls

|                        |              |              |             |
|------------------------|--------------|--------------|-------------|
| ATP6V1G3:CCDS1396.1    | -1.818296849 | -0.713292695 | 17.95253659 |
| TCF23:CCDS33163.1      | -1.668215227 | -0.366231067 | 17.94081257 |
| MCOLN3:CCDS701.1       | -1.890201904 | 2.15757985   | 17.94062616 |
| KIF13A:CCDS47380.1     | 0.6754661    | 5.307415654  | 17.93645379 |
| ART3:CCDS47080.1       | -1.314033224 | 0.554254925  | 17.93573021 |
| ITGB8:CCDS5370.1       | 0.947323707  | 4.659123467  | 17.93115713 |
| RAPSN:CCDS7936.1       | -1.973122373 | 1.495641152  | 17.92564911 |
| BEST3:CCDS8992.2       | -0.978094558 | 1.402303281  | 17.91824666 |
| ERP27:CCDS8670.1       | -1.684468937 | -0.151064467 | 17.90802784 |
| NCR3:CCDS47401.1       | -1.467882437 | 0.045090313  | 17.90661087 |
| CDK18:CCDS1454.1       | -1.183115702 | 3.194608249  | 17.90604313 |
| SSTR5:CCDS10429.1      | -1.643206539 | -0.001346366 | 17.9054394  |
| OR51I2:CCDS31383.1     | -1.778319442 | -0.402144403 | 17.90081139 |
| SLC27A3:CCDS1053.1     | 0.745361177  | 4.58766856   | 17.89877735 |
| PLEKHB1:CCDS44675.1    | -1.064060369 | 2.44726139   | 17.88900784 |
| OR10J1:CCDS1185.1      | -1.711694734 | -0.366358688 | 17.88779759 |
| CDK18:CCDS44300.1      | -1.186663176 | 3.181729441  | 17.88562785 |
| MS4A10:CCDS7992.1      | -1.787085669 | 0.073602936  | 17.87902738 |
| C5orf63:CCDS54895.1    | -1.757005912 | -0.823097285 | 17.87164567 |
| KRTAP9-1:CCDS56029.1   | -1.666984946 | -0.599797757 | 17.86697141 |
| TMEM190:CCDS33113.1    | -1.696879265 | -0.096936782 | 17.85318198 |
| PSG9:CCDS12618.1       | -1.666278952 | 0.400050107  | 17.85241942 |
| PRKACG:CCDS6625.1      | -1.34029942  | -0.133500426 | 17.84701941 |
| KRTAP10-2:CCDS42955.1  | -1.716274402 | -0.521420736 | 17.84557747 |
| ADAM28:CCDS47830.1     | -1.7583475   | 1.660481596  | 17.84428142 |
| PROL1:CCDS43235.1      | -1.654807578 | -0.46773991  | 17.84143554 |
| ART3:CCDS3575.1        | -1.31156744  | 0.708003317  | 17.83819045 |
| LRIT1:CCDS7373.1       | -1.052881731 | 0.899710622  | 17.83454296 |
| LHCGR:CCDS1842.1       | -1.727430532 | 1.523060432  | 17.8343876  |
| OR2L8:CCDS31101.1      | -1.684514061 | -0.370216356 | 17.82191382 |
| CYSLTR1:CCDS14439.1    | -1.290804271 | -0.045566736 | 17.80933989 |
| OR6C68:CCDS31826.2     | -1.664328335 | -0.36540259  | 17.8084005  |
| OR52B6:CCDS41611.1     | -1.651708775 | -0.564972694 | 17.79037253 |
| C9orf131:CCDS6572.2    | -0.878833044 | 1.441793679  | 17.78827778 |
| SUV39H1:CCDS14304.1    | -1.176554    | 3.449525504  | 17.78389023 |
| OR5C1:CCDS35131.1      | -1.163699154 | -0.539686488 | 17.78307202 |
| ZNF365:CCDS7265.1      | -1.823683568 | -0.479990416 | 17.78214324 |
| GRM3:CCDS5600.1        | -0.977067784 | 3.68431422   | 17.78189011 |
| OR10R2:CCDS30898.1     | -1.608974592 | -0.18811943  | 17.77949387 |
| SLC19A3:CCDS2468.1     | -1.04013469  | 0.599465859  | 17.76739331 |
| ST6GALNAC1:CCDS11748.1 | -1.118427519 | 0.843714447  | 17.75101179 |
| MAMDC2:CCDS6631.1      | -1.085920415 | 1.879183532  | 17.75041423 |
| SPANXN2:CCDS35419.1    | -1.784624504 | -0.657371679 | 17.74575286 |
| TUBA3D:CCDS33290.1     | -1.477062546 | 3.727959533  | 17.73813701 |
| NCR2:CCDS4855.1        | -1.316917536 | 0.132193674  | 17.73267876 |
| MAGEA9:CCDS14691.1     | -1.742431414 | -0.467697801 | 17.73203385 |
| OR12D2:CCDS4659.1      | -1.672243722 | -0.452525141 | 17.72919566 |
| LGSN:CCDS4964.1        | -1.872782069 | 0.295587624  | 17.72816053 |
| SMPDL3B:CCDS30655.1    | -1.088370191 | 1.319368683  | 17.72734211 |
| A1CF:CCDS7243.1        | -1.208568581 | 0.812460656  | 17.7216298  |
| SLC23A1:CCDS4213.1     | -1.029361044 | 1.001912046  | 17.71944952 |

## TAUvsControls

|                      |              |              |             |
|----------------------|--------------|--------------|-------------|
| UGT1A5:CCDS33404.1   | -1.0547816   | 0.700030415  | 17.71931615 |
| GP6:CCDS46184.1      | -1.246081617 | 0.469764392  | 17.71693253 |
| NKX3-2:CCDS3410.1    | -1.12156719  | 0.179800586  | 17.71372711 |
| OR9I1:CCDS31542.1    | -1.678306489 | -0.551390601 | 17.70197988 |
| SMYD1:CCDS33240.1    | -2.395095748 | 1.309023473  | 17.69778626 |
| EMR2:CCDS32935.1     | -0.977491467 | 1.937063648  | 17.69677389 |
| CKM:CCDS12659.1      | -2.225801802 | 2.907108844  | 17.69018833 |
| CX3CR1:CCDS43069.1   | -1.946658355 | -0.071678772 | 17.68981279 |
| KCNC2:CCDS9005.1     | -1.014549584 | 1.445778188  | 17.68968555 |
| HSD17B13:CCDS3618.1  | -1.238113084 | 0.197193924  | 17.68684754 |
| TCIRG1:CCDS8177.1    | -0.819222453 | 2.72828915   | 17.68683596 |
| HR:CCDS6022.1        | -1.120474341 | 2.537243148  | 17.68559624 |
| GLOD5:CCDS55410.1    | -1.584460746 | 0.043965449  | 17.68261289 |
| CCR2:CCDS43078.1     | -1.676144336 | -0.158538663 | 17.65956801 |
| CRYGA:CCDS33367.1    | -2.32835498  | 1.524358045  | 17.65681628 |
| LIPM:CCDS44457.1     | -1.166399187 | 0.1693471    | 17.65351578 |
| HAUS4:CCDS9580.1     | 0.698711295  | 4.452138347  | 17.64891132 |
| APOL1:CCDS46702.1    | -1.24811324  | 0.674731001  | 17.64726837 |
| IL9:CCDS4189.1       | -1.713480737 | -0.772738896 | 17.64673375 |
| PLCD4:CCDS46516.1    | 0.797068703  | 3.048194241  | 17.63646412 |
| TAS2R42:CCDS31747.1  | -1.641502073 | -0.456477042 | 17.63427489 |
| CHST4:CCDS10902.1    | -1.264537232 | 0.442045392  | 17.63084209 |
| TRIM72:CCDS32437.1   | -1.433029612 | 0.746038998  | 17.62586466 |
| MUC15:CCDS7859.1     | -1.674025029 | -0.136357982 | 17.62164735 |
| IL5RA:CCDS2559.1     | -1.031417621 | 0.879776972  | 17.61911116 |
| FSHR:CCDS1844.2      | -1.185773855 | 0.772533843  | 17.61574053 |
| C12orf54:CCDS8764.1  | -1.649699665 | -0.336558078 | 17.61351448 |
| DPP4:CCDS2216.1      | -1.062835197 | 2.137171652  | 17.60964599 |
| PRB1:CCDS8642.1      | -1.78013969  | -0.653981869 | 17.597241   |
| SLC6A19:CCDS34130.1  | -1.683413673 | 1.172200814  | 17.58650916 |
| OR1L8:CCDS35124.1    | -1.719049442 | -0.615022217 | 17.58207891 |
| MSLN:CCDS45370.1     | -0.865785047 | 1.708969991  | 17.56843034 |
| NCR3:CCDS34397.1     | -1.391763734 | 0.143320959  | 17.56781589 |
| OR10A5:CCDS7773.1    | -1.66596058  | -0.454429801 | 17.56192015 |
| C10orf55:CCDS53541.1 | -1.058725854 | 0.513547924  | 17.56098942 |
| GNRHR:CCDS47064.1    | -1.147855328 | -0.05894806  | 17.56075345 |
| SNTG1:CCDS6147.1     | -0.878127145 | 1.700260802  | 17.55796415 |
| PRPH2:CCDS4871.1     | -1.827098311 | 0.362487458  | 17.55608581 |
| SLFNL1:CCDS460.1     | -1.128375424 | 0.640083484  | 17.55087571 |
| DRAM1:CCDS41823.1    | -1.08561125  | 1.924574474  | 17.54619769 |
| VIT:CCDS54350.1      | -2.025733607 | -0.256698085 | 17.53442959 |
| GLRA3:CCDS43283.1    | -1.329736536 | 0.647479038  | 17.52672081 |
| ADAM20:CCDS32111.1   | -0.994934519 | 0.691246076  | 17.52664242 |
| TMEM125:CCDS480.1    | -1.705037569 | -0.65583301  | 17.52211742 |
| ESM1:CCDS47206.1     | -1.298239351 | -0.695746576 | 17.51877649 |
| HFE:CCDS4579.1       | -1.515078851 | 1.031015919  | 17.51846606 |
| OSCAR:CCDS12874.1    | -1.006822918 | 0.095856316  | 17.48342968 |
| FTMT:CCDS4128.1      | -1.635950199 | -0.017563314 | 17.47164687 |
| SLC23A1:CCDS4212.1   | -1.022975696 | 0.99640196   | 17.46330758 |
| OR2T34:CCDS31120.1   | -1.661815194 | -0.506693784 | 17.46191533 |
| OR2G3:CCDS31093.1    | -1.681733564 | -0.432922527 | 17.46020871 |

## TAUvsControls

|                      |              |              |             |
|----------------------|--------------|--------------|-------------|
| XAGE1C:CCDS43955.2   | -1.878872235 | -0.804841542 | 17.45579502 |
| FTHL17:CCDS14227.1   | -1.690593036 | -0.683316253 | 17.43670081 |
| CLEC7A:CCDS8613.1    | -1.682839193 | 0.062121003  | 17.43632313 |
| ALDH7A1:CCDS56380.1  | 0.818043137  | 5.705067445  | 17.43569539 |
| GDF9:CCDS4162.1      | -1.095679188 | 0.248994109  | 17.43382605 |
| KIF13A:CCDS47381.1   | 0.655238288  | 5.340982781  | 17.42556967 |
| LSP1:CCDS31334.1     | -1.171604119 | 1.802708226  | 17.41793309 |
| RASGRP4:CCDS54264.1  | -0.998258045 | 1.508010083  | 17.39888744 |
| CT45A4:CCDS35405.1   | -1.833114672 | -0.648800497 | 17.39711542 |
| MYOD1:CCDS7826.1     | -2.542756783 | 0.724416909  | 17.38972853 |
| LHX8:CCDS30756.1     | -2.180191234 | 0.813653326  | 17.3794034  |
| OR51I1:CCDS31382.1   | -1.707390219 | -0.481007766 | 17.3740984  |
| DAPK2:CCDS10188.1    | -1.295062422 | 1.16946294   | 17.37138966 |
| FABP12:CCDS47882.1   | -1.711885151 | -0.53467262  | 17.36246601 |
| HPSE:CCDS56337.1     | -1.146000631 | 0.763918711  | 17.3609834  |
| MYT1L:CCDS46222.1    | -0.926224912 | 4.330218969  | 17.34579332 |
| MAGEE2:CCDS14431.1   | -1.100363925 | 0.296241098  | 17.34040314 |
| OR51B4:CCDS7757.1    | -1.692488776 | -0.578361725 | 17.32897415 |
| TXNDC2:CCDS11846.1   | -1.239823262 | 0.841175363  | 17.32752516 |
| OR52J3:CCDS31370.1   | -1.604333353 | -0.176026997 | 17.32583616 |
| LYZL6:CCDS11302.1    | -1.826752454 | -0.673313473 | 17.31799172 |
| OR2T4:CCDS31113.1    | -1.647934057 | -0.459451904 | 17.31776013 |
| HPSE:CCDS3602.1      | -1.182229228 | 0.892976671  | 17.31768383 |
| HPCA:CCDS370.1       | -1.286033752 | 2.955296583  | 17.31123867 |
| TRIM6:CCDS55738.1    | -1.191597246 | 0.739577402  | 17.30675926 |
| OR7A5:CCDS12318.1    | -1.344262286 | -0.594661359 | 17.30269498 |
| ANGPT4:CCDS13009.1   | -1.397629367 | 1.628307785  | 17.29985385 |
| HAPLN1:CCDS4061.1    | -2.485337283 | 1.714103842  | 17.2972844  |
| ZNF534:CCDS46165.1   | -1.043530767 | 0.653427527  | 17.29453798 |
| TMEM184A:CCDS43537.1 | -1.408254326 | 0.809930025  | 17.29341021 |
| OR52I2:CCDS31355.1   | -1.647284396 | -0.49732301  | 17.28359209 |
| C6:CCDS3936.1        | -1.259349415 | 1.576416676  | 17.27856165 |
| DYM:CCDS11937.1      | 0.660409104  | 5.041541451  | 17.27818056 |
| SLCO2A1:CCDS3084.1   | -1.000973598 | 1.308092124  | 17.27678945 |
| IGFL2:CCDS46122.1    | -1.075288624 | -0.27999513  | 17.27560088 |
| DOCK6:CCDS45975.1    | 0.882409138  | 6.308929928  | 17.27068852 |
| CLEC5A:CCDS5870.1    | -1.737919368 | 0.059452768  | 17.26570411 |
| DUOXA1:CCDS10119.1   | -0.887523933 | 1.033453964  | 17.26203296 |
| HTR1E:CCDS5006.1     | -1.118617305 | 0.189320833  | 17.24529418 |
| C1QL3:CCDS31156.1    | -1.422103549 | 0.51180053   | 17.24528834 |
| TNFRSF18:CCDS9.1     | -1.065295504 | -0.134230153 | 17.23937112 |
| PTPN6:CCDS44820.1    | -0.965200833 | 1.56213394   | 17.2389435  |
| TFPI2:CCDS5632.1     | -1.05258094  | 1.737964097  | 17.22803322 |
| C15orf48:CCDS10124.1 | -1.394929998 | 0.027945492  | 17.22446013 |
| CSF1R:CCDS4302.1     | -0.824302684 | 1.851151311  | 17.21154204 |
| CHMP3:CCDS42707.1    | 0.66846996   | 4.459244498  | 17.209575   |
| NOSTRIN:CCDS42771.1  | -1.068489852 | 1.23396963   | 17.20533821 |
| ANKRD2:CCDS7466.1    | -0.949362667 | 0.608900732  | 17.1988377  |
| ACSL5:CCDS7572.1     | -1.020699677 | 1.628230249  | 17.19731477 |
| OR2L13:CCDS1637.1    | -1.186257815 | -0.312926357 | 17.18794899 |
| SLC17A9:CCDS42901.1  | -1.019009525 | 1.138921267  | 17.1867058  |

## TAUvsControls

|                       |              |              |             |
|-----------------------|--------------|--------------|-------------|
| FCER1A:CCDS1184.1     | -1.640005305 | -0.195785387 | 17.18244989 |
| TMEM144:CCDS3799.1    | -1.125249172 | 0.406368938  | 17.17613518 |
| SPP2:CCDS2511.1       | -1.673638251 | -0.212387603 | 17.1758678  |
| CYB5R2:CCDS7780.1     | -1.040802131 | 0.979552105  | 17.17563192 |
| BFSP2:CCDS33859.1     | -2.399799156 | 1.38125818   | 17.17032795 |
| LSP1:CCDS31335.1      | -1.209220344 | 1.541261555  | 17.16988992 |
| ART3:CCDS47079.1      | -1.324605391 | 0.80861075   | 17.16130263 |
| OR10V1:CCDS31565.1    | -1.68015924  | -0.663356248 | 17.15294745 |
| FCAR:CCDS12908.1      | -1.611090648 | 0.144476089  | 17.15200769 |
| KLK4:CCDS12809.1      | -1.077573936 | -0.116127778 | 17.14961153 |
| IL5RA:CCDS46739.1     | -1.156370253 | 0.616639557  | 17.14002995 |
| GREM1:CCDS10029.1     | -1.894030769 | 0.532276142  | 17.12921278 |
| OR2AG1:CCDS31414.1    | -1.711329789 | -0.624640094 | 17.12029992 |
| TAS2R1:CCDS3876.1     | -1.667592157 | -0.532568586 | 17.11819872 |
| GJB3:CCDS384.1        | -1.638882604 | -0.274306163 | 17.107604   |
| SVIL:CCDS7163.1       | 0.947764676  | 6.23994261   | 17.10427099 |
| CMYA5:CCDS47238.1     | -1.566094008 | 3.245494843  | 17.10425924 |
| GSC2:CCDS13757.1      | -1.70503875  | -0.8404553   | 17.09245595 |
| A1CF:CCDS7241.1       | -1.183470927 | 0.801361839  | 17.07419684 |
| OR5B2:CCDS31550.1     | -1.647689733 | -0.528909845 | 17.06997699 |
| CMA1:CCDS9630.1       | -1.128759396 | -0.136862917 | 17.06812008 |
| TMC8:CCDS32749.1      | -1.235577759 | 1.2598955    | 17.06224449 |
| MCF2:CCDS55514.1      | -0.890551417 | 1.903526818  | 17.04040383 |
| TEAD1:CCDS7810.2      | 0.789767352  | 3.46749822   | 17.03874612 |
| PTPN6:CCDS44821.1     | -0.958173021 | 1.587947591  | 17.02675757 |
| TAS2R41:CCDS43663.1   | -1.615224697 | -0.435447029 | 17.02486635 |
| OR8B2:CCDS31708.1     | -1.678390634 | -0.289865272 | 17.02425538 |
| FCRLA:CCDS53418.1     | -1.655439403 | 0.173021408  | 17.02357999 |
| SLC36A3:CCDS47316.1   | -1.079844934 | 1.14167013   | 17.01767419 |
| FSHR:CCDS1843.1       | -1.156166934 | 0.859259229  | 17.01444001 |
| FFAR2:CCDS12461.1     | -1.645901017 | -0.107223111 | 17.01004316 |
| A1CF:CCDS7242.1       | -1.179519127 | 0.811502023  | 17.00562899 |
| MYO18B:CCDS54507.1    | -1.581947858 | 3.302215555  | 17.00426495 |
| MRO:CCDS45867.1       | -1.194394933 | -0.031236678 | 16.99771104 |
| CRX:CCDS12706.1       | -2.2018014   | 0.757941273  | 16.99436809 |
| PPP1R2:CCDS3309.1     | -1.020124294 | 4.195414688  | 16.98984975 |
| CCIN:CCDS6599.1       | -1.004078269 | 0.437096023  | 16.98360319 |
| SLC6A2:CCDS54011.1    | -1.777684189 | 1.92261954   | 16.97593921 |
| VPREB1:CCDS13798.1    | -1.795471091 | -0.857898154 | 16.96759995 |
| SP140:CCDS33392.1     | -1.700888674 | -0.654879206 | 16.96505626 |
| C10orf68:CCDS31177.1  | -1.105997436 | 1.50815105   | 16.96378448 |
| UGT1A4:CCDS33405.1    | -1.04022537  | 0.64160767   | 16.96211066 |
| ADRB3:CCDS6099.1      | -1.171818291 | 0.000837918  | 16.96020498 |
| OR2B11:CCDS31090.1    | -1.622942327 | -0.391013222 | 16.95771728 |
| PLBD1:CCDS31751.1     | -1.20734353  | 0.863624906  | 16.95660438 |
| BTC:CCDS3566.1        | -1.63959495  | -0.022071682 | 16.95387928 |
| XAGE5:CCDS14346.1     | -1.664680498 | -0.569925028 | 16.92629198 |
| TNN:CCDS30943.1       | 1.158947605  | 3.346862676  | 16.92278716 |
| MYZAP:CCDS42044.1     | -1.423190778 | 1.47760558   | 16.91429023 |
| C4orf22:CCDS56336.1   | -1.317046029 | 0.173707406  | 16.91219306 |
| KRTAP26-1:CCDS13588.1 | -1.744814836 | -0.897343299 | 16.9056197  |

## TAUvsControls

|                     |              |              |             |
|---------------------|--------------|--------------|-------------|
| FETUB:CCDS3279.1    | -1.133525978 | 1.203591521  | 16.90517775 |
| EFHC2:CCDS55405.1   | -1.250583151 | 2.160589787  | 16.90397896 |
| OR2T35:CCDS31123.1  | -1.630252302 | -0.334395481 | 16.89316603 |
| LRR36:CCDS32467.1   | -0.840616331 | 1.605742632  | 16.89062988 |
| TMPRSS3:CCDS13686.1 | -0.931637222 | 0.939591828  | 16.89037395 |
| AGAP3:CCDS43681.1   | -0.762266778 | 7.084135266  | 16.88142029 |
| RNF212:CCDS46996.1  | -1.256192358 | 0.951642363  | 16.87839608 |
| DNAJC5G:CCDS1744.1  | -1.671154327 | -0.35429706  | 16.87690911 |
| GAGE2C:CCDS35260.1  | -1.420586825 | -0.317763515 | 16.87174883 |
| FCAR:CCDS42624.1    | -1.609237738 | -0.147647587 | 16.86838814 |
| SLC10A4:CCDS3482.1  | -0.969555209 | 1.317103742  | 16.86389905 |
| OR10X1:CCDS30900.1  | -1.5894918   | -0.438239223 | 16.85665449 |
| ELF3:CCDS1419.1     | -0.955237905 | 0.728727177  | 16.85444057 |
| POLH:CCDS4902.1     | 0.747228744  | 3.906335751  | 16.84757781 |
| BMP15:CCDS14334.1   | -1.640307481 | -0.217286731 | 16.83544196 |
| OR2C3:CCDS1634.2    | -1.651001507 | -0.047151656 | 16.83278909 |
| MYL4:CCDS11510.1    | -2.48252057  | 2.817954842  | 16.83166784 |
| IL22RA2:CCDS5182.1  | -1.660701106 | -0.311239719 | 16.82378798 |
| NOSTRIN:CCDS54415.1 | -1.072744622 | 1.345789354  | 16.81960616 |
| MYBPH:CCDS30975.1   | -2.89428974  | 4.271857279  | 16.80956786 |
| IL16:CCDS10317.1    | -1.168671023 | 1.312277538  | 16.80340371 |
| ICOS:CCDS2363.1     | -1.751609103 | -0.745285839 | 16.79624992 |
| VN1R2:CCDS12862.1   | -1.011290966 | 0.269674287  | 16.7954711  |
| ISM1:CCDS46579.1    | -1.046202393 | 1.347057576  | 16.78914152 |
| TICAM1:CCDS12136.1  | -1.055272496 | 1.504804084  | 16.7853013  |
| PTPN20B:CCDS53533.1 | -1.556470816 | 0.446407498  | 16.78383995 |
| TMEM154:CCDS3779.1  | -1.721233692 | -0.283127769 | 16.77825304 |
| RNASE6:CCDS9558.1   | -1.65019046  | -0.742698007 | 16.7679017  |
| BTBD18:CCDS44603.1  | -0.858561525 | 1.086411871  | 16.75516367 |
| RXFP3:CCDS3900.1    | -1.125231248 | 0.217105023  | 16.75345357 |
| NXF2B:CCDS43979.1   | -0.896243705 | 1.240438168  | 16.7516728  |
| DUOXA2:CCDS10118.2  | -1.160544195 | -0.011293816 | 16.74916846 |
| GSG1:CCDS55806.1    | -0.910046726 | 1.649811241  | 16.74510273 |
| GRB7:CCDS11345.1    | -1.022925103 | 1.309489442  | 16.7415619  |
| FGB:CCDS3786.1      | -1.731610096 | 1.04574545   | 16.74058094 |
| HSFY2:CCDS35476.1   | -1.744834642 | -0.669536576 | 16.73840715 |
| GZMB:CCDS9633.1     | -1.797598079 | 0.469052707  | 16.72825107 |
| ZNF534:CCDS46166.1  | -1.025432598 | 0.609769837  | 16.72604327 |
| NLRP4:CCDS12936.1   | -2.394295059 | 1.392821448  | 16.72110556 |
| SLC6A2:CCDS10754.1  | -1.773513427 | 1.937365022  | 16.71078711 |
| BEST3:CCDS41810.1   | -0.954410426 | 0.520399999  | 16.70907601 |
| BATF:CCDS9843.1     | -1.679359274 | -0.531310491 | 16.70247488 |
| GJA3:CCDS9289.1     | -1.324031059 | 0.161388548  | 16.69266588 |
| ALDH7A1:CCDS4137.2  | 0.790056374  | 5.933077096  | 16.68082858 |
| ICAM1:CCDS12231.1   | -1.402366602 | 3.607684449  | 16.67736524 |
| ATP6V1G3:CCDS1395.1 | -1.718851751 | -0.752012754 | 16.6664259  |
| TMEM95:CCDS32546.1  | -1.104025229 | -0.279119311 | 16.66066891 |
| OR11G2:CCDS32032.1  | -1.602846904 | -0.305489973 | 16.65884493 |
| MIP:CCDS8919.1      | -1.956007084 | 1.24298481   | 16.647637   |
| GCM2:CCDS4517.1     | -1.235902995 | 0.995958006  | 16.64397814 |
| OR2T29:CCDS55695.1  | -1.672139516 | -0.45907512  | 16.64270387 |



## TAUvsControls

|                       |              |              |             |
|-----------------------|--------------|--------------|-------------|
| PRB1:CCDS55805.1      | -1.757638337 | -0.778769147 | 16.63744085 |
| CT45A6:CCDS35407.1    | -1.76146296  | -0.669684848 | 16.63388592 |
| OR5P3:CCDS7783.1      | -1.613402652 | -0.429165442 | 16.62572182 |
| RNF150:CCDS34065.1    | 0.881366137  | 3.493310167  | 16.62347432 |
| FOX4:CCDS34975.1      | -0.965623019 | 0.443942696  | 16.60829554 |
| PABPC1L2A:CCDS35334.1 | -1.12939988  | 0.929137645  | 16.60609128 |
| KIR2DL3:CCDS33107.1   | -1.633029383 | 0.965975681  | 16.60576657 |
| ITLN1:CCDS1211.1      | -1.739408844 | 1.304706475  | 16.593013   |
| FGF4:CCDS8194.1       | -1.548520454 | -0.094164939 | 16.59093443 |
| PDYN:CCDS13023.1      | -2.06302105  | 0.834047258  | 16.58492153 |
| CNGA1:CCDS47050.1     | -0.8649786   | 1.746494201  | 16.57810045 |
| OPRM1:CCDS43518.1     | -1.047732087 | 0.990604697  | 16.57026988 |
| IL5RA:CCDS2560.1      | -1.142153235 | 0.645440998  | 16.56833927 |
| OR51B2:CCDS31377.1    | -1.611784182 | -0.287059938 | 16.56461798 |
| OR2L3:CCDS31104.1     | -1.587428871 | -0.296309288 | 16.56418677 |
| OR1S2:CCDS31545.1     | -1.636050989 | -0.433101637 | 16.55708452 |
| OR4C3:CCDS31489.1     | -1.629578954 | -0.411813008 | 16.54752014 |
| NCL:CCDS33397.1       | 0.70924895   | 8.623565811  | 16.54394273 |
| NMUR1:CCDS2486.1      | -1.017752671 | 0.227600802  | 16.54256341 |
| OTOF:CCDS1725.1       | -0.947754066 | 3.136290693  | 16.53816073 |
| CD3D:CCDS41724.1      | -1.725105866 | -0.738253595 | 16.53749997 |
| OLAH:CCDS31152.1      | -1.579239105 | 0.212399493  | 16.5313396  |
| OR7C1:CCDS12317.1     | -1.303906646 | -0.422239696 | 16.52665674 |
| MYH6:CCDS9600.1       | -0.935124245 | 3.098954209  | 16.52475369 |
| CYP4X1:CCDS544.1      | -1.545792465 | 2.163391694  | 16.52019619 |
| NTRK2:CCDS35050.1     | 0.883204852  | 6.289247308  | 16.51810263 |
| SPERT:CCDS9399.1      | -0.990574042 | 0.324633513  | 16.51549185 |
| NXF2:CCDS14497.1      | -0.904476855 | 1.242740421  | 16.50661181 |
| BSX:CCDS41728.1       | -1.253034401 | -0.350105552 | 16.49903844 |
| KRTAP5-5:CCDS41592.1  | -1.266688317 | -0.792054333 | 16.4967031  |
| PABPC1L2B:CCDS43972.1 | -1.134643267 | 0.928911789  | 16.49594088 |
| GPR174:CCDS14443.1    | -1.638168306 | -0.595358407 | 16.48592159 |
| EPCAM:CCDS1833.1      | -1.413371784 | 0.797805395  | 16.48281287 |
| GLRA3:CCDS3822.1      | -1.252767065 | 0.734257352  | 16.46388611 |
| SPI1:CCDS44591.1      | -1.085444974 | 0.298744767  | 16.46103957 |
| OR4D11:CCDS31563.1    | -1.623678836 | -0.385508131 | 16.44387841 |
| ABCC6:CCDS10568.1     | -0.794895103 | 2.711124659  | 16.44352286 |
| CFHR3:CCDS30958.1     | -1.838888463 | 0.305590225  | 16.42781203 |
| EDARADD:CCDS1610.1    | -1.264397271 | -0.383973445 | 16.42743616 |
| OR6Y1:CCDS30899.1     | -1.626990362 | -0.482474491 | 16.42740554 |
| RBM46:CCDS3790.1      | -1.009332113 | 0.220876503  | 16.42620936 |
| PPAP2C:CCDS12024.1    | -1.143015816 | 1.037311149  | 16.4178637  |
| NTRK2:CCDS6671.1      | 0.878189486  | 6.306282577  | 16.41456923 |
| SLIT3:CCDS4369.1      | 1.12337236   | 7.19663965   | 16.40750461 |
| LYPD5:CCDS46096.1     | -1.161421859 | 0.121683072  | 16.40724218 |
| BRWD1:CCDS33557.1     | -0.848928504 | 3.640024149  | 16.39795743 |
| FABP5:CCDS6228.1      | -1.071933345 | 5.117428258  | 16.39091624 |
| HSFY1:CCDS14790.1     | -1.737634712 | -0.674048073 | 16.39068983 |
| TP63:CCDS3293.1       | -1.221711755 | 1.431613513  | 16.39050611 |
| MTHFS:CCDS10311.1     | -1.006826379 | 1.72162429   | 16.39008787 |
| LY86:CCDS4498.1       | -1.61528675  | -0.516706392 | 16.385981   |

## TAUvsControls

|                          |              |              |             |
|--------------------------|--------------|--------------|-------------|
| KCNC2:CCDS9006.1         | -0.986238553 | 1.270600498  | 16.38160514 |
| OR13C8:CCDS35090.1       | -1.615405413 | -0.553054854 | 16.37445716 |
| FAM49A:CCDS1688.1        | -1.12836455  | 4.268337298  | 16.37184511 |
| C1orf116:CCDS44306.1     | -1.230487675 | 0.317949079  | 16.36802194 |
| ATP2B3:CCDS14722.1       | -0.78197694  | 4.479559302  | 16.3652135  |
| SGCA:CCDS32679.1         | -2.461939576 | 3.480502104  | 16.35937122 |
| KCNK1:CCDS1599.1         | -1.122481242 | 2.318784088  | 16.35490889 |
| CYP4F2:CCDS12336.1       | -0.885326873 | 0.824626561  | 16.35462964 |
| FRMPD4:CCDS35201.1       | -1.004941465 | 2.244701252  | 16.35307946 |
| KRTAP10-10:CCDS33585.1   | -1.660902202 | -0.586487428 | 16.35158819 |
| HNMT:CCDS2181.1          | -1.067325222 | 0.46037262   | 16.35076268 |
| SPRY3:CCDS14769.4        | -0.887943168 | 1.339459074  | 16.34367588 |
| OR6C6:CCDS31817.1        | -1.641574131 | -0.780835911 | 16.32419157 |
| FBXO32:CCDS56553.1       | -1.124838667 | 2.165471705  | 16.31997519 |
| MAPK10:CCDS3613.1        | 0.847352001  | 4.791335259  | 16.3056885  |
| UGT1A10:CCDS33403.1      | -1.065770943 | 0.802516924  | 16.30419147 |
| HTR2A:CCDS53867.1        | -1.300310524 | 0.249418132  | 16.29891878 |
| PLEKHB1:CCDS44672.1      | -1.055919026 | 2.717591587  | 16.29391609 |
| NUCKS1:CCDS30987.1       | 0.808257699  | 6.539971404  | 16.28217076 |
| CCR6:CCDS5298.1          | -1.074501128 | -0.088057496 | 16.27968046 |
| C8orf86:CCDS6108.1       | -1.646139542 | -0.269804299 | 16.27849607 |
| SVIL:CCDS7164.1          | 0.926752168  | 6.322443654  | 16.26531382 |
| TM4SF20:CCDS2466.1       | -1.613109337 | -0.33691376  | 16.26159908 |
| SGCA:CCDS45729.1         | -2.475436837 | 3.146203039  | 16.25210381 |
| ABHD12B:CCDS9702.1       | -1.011626529 | 0.632684884  | 16.2476074  |
| ASCL4:CCDS31894.2        | -1.705910594 | -0.951811011 | 16.24610204 |
| MYBPC1:CCDS9084.1        | -1.37419169  | 3.214117425  | 16.24536485 |
| IL31RA:CCDS56366.1       | -1.068133283 | 1.380532189  | 16.2338207  |
| TTN:CCDS54424.1          | -0.974309068 | 6.821270917  | 16.21964121 |
| IMPG2:CCDS2940.1         | -1.903977957 | 3.231265939  | 16.20024647 |
| FAM83G:CCDS42276.1       | -1.031377376 | 1.892550061  | 16.19057422 |
| CX3CR1:CCDS54571.1       | -1.818007572 | 0.171552383  | 16.18569419 |
| ELOVL7:CCDS34164.1       | -1.376595493 | 0.615791576  | 16.18515735 |
| CHRNA9:CCDS3459.1        | -1.376393913 | 0.726705419  | 16.18337744 |
| ZMYND15:CCDS45584.1      | -0.986150174 | 1.427636801  | 16.18321425 |
| OR13H1:CCDS35396.1       | -1.626015567 | -0.617660696 | 16.17182195 |
| CLEC4D:CCDS8593.1        | -1.61601677  | -0.438881232 | 16.17043528 |
| HAND1:CCDS4327.1         | -1.618498935 | -0.261958433 | 16.16904046 |
| FAM83A:CCDS6339.1        | -1.541894341 | 0.215105582  | 16.15772884 |
| FOXL1:CCDS10959.1        | -1.072219545 | -0.199115474 | 16.15183614 |
| GPR182:CCDS8927.1        | -0.943076441 | 0.061218875  | 16.15110218 |
| ACVRL1:CCDS31804.1       | -1.002657684 | 1.269452677  | 16.14360798 |
| OR5H6:CCDS33800.1        | -1.625907907 | -0.567071578 | 16.13985899 |
| HSD17B11:CCDS3619.1      | 0.755489126  | 2.939577637  | 16.138246   |
| MAGEB6:CCDS14217.1       | -1.37520778  | -0.275491651 | 16.13795537 |
| MYBPC1:CCDS9083.1        | -1.376003591 | 3.246432797  | 16.13019416 |
| TP63:CCDS46978.1         | -1.198555203 | 1.292072622  | 16.12656391 |
| FOXD4L6:CCDS43826.1      | -1.291438606 | 0.066594293  | 16.12383632 |
| C2orf71:CCDS42669.1      | -1.444540729 | 1.629951834  | 16.12366945 |
| RNF103-CHMP3:CCDS56128.1 | 0.679272445  | 4.803218989  | 16.12095114 |
| ETV7:CCDS56422.1         | -1.650180232 | -0.566455382 | 16.12018372 |

## TAUvsControls

|                       |              |              |             |
|-----------------------|--------------|--------------|-------------|
| OR2T1:CCDS31115.1     | -1.614615947 | -0.256807165 | 16.1166435  |
| LIPK:CCDS44455.1      | -1.611590411 | 0.105095386  | 16.11383061 |
| GRB2:CCDS11722.1      | -0.765701382 | 5.385590038  | 16.11093284 |
| SPI1:CCDS7933.2       | -1.07634647  | 0.282722922  | 16.10917729 |
| OR1B1:CCDS35126.1     | -1.554230654 | -0.055240694 | 16.10694595 |
| ATP2B3:CCDS35440.1    | -0.783569039 | 4.484896876  | 16.10315079 |
| ILDR2:CCDS1256.1      | 0.88433099   | 4.06799638   | 16.1012739  |
| GIMAP6:CCDS34778.1    | -1.681666796 | 0.000264133  | 16.09816539 |
| OR5R1:CCDS31530.1     | -1.612093365 | -0.608734737 | 16.09097493 |
| CAPN9:CCDS1586.1      | -0.917615017 | 1.93691204   | 16.08518267 |
| SLC25A43:CCDS14577.1  | -1.539300294 | 1.699194365  | 16.08374285 |
| OR4M1:CCDS32021.1     | -1.645469702 | -0.571349541 | 16.08330113 |
| SCN11A:CCDS33737.1    | -1.045666366 | 2.374721545  | 16.08194455 |
| OTOF:CCDS46241.1      | -0.95274622  | 2.491002476  | 16.07822508 |
| HFE2:CCDS912.1        | -1.895103006 | -0.646710107 | 16.07635979 |
| SLC17A7:CCDS12764.1   | -1.609387715 | 4.406800623  | 16.07537372 |
| PDCL2:CCDS47059.1     | -1.621776018 | -0.376635566 | 16.07531244 |
| CTHRC1:CCDS6299.1     | -1.313212165 | 0.540792561  | 16.07200045 |
| OR6K3:CCDS30903.2     | -1.594580633 | -0.278932425 | 16.07182993 |
| CXorf64:CCDS48163.1   | -2.308223602 | -0.394495395 | 16.07126407 |
| SIRT4:CCDS9194.1      | -0.886594685 | 1.523056475  | 16.06430004 |
| EDARADD:CCDS31065.1   | -1.224998353 | -0.394691079 | 16.05715106 |
| GFAP:CCDS45708.1      | -2.195222489 | 4.754851762  | 16.05622323 |
| GREM1:CCDS53927.1     | -1.865655919 | 0.51556276   | 16.04872003 |
| ASB9:CCDS14163.1      | -1.136425259 | 0.321931798  | 16.03997029 |
| NPY2R:CCDS3791.1      | -1.040905348 | 0.193514446  | 16.03637702 |
| FAM177B:CCDS1535.2    | -1.85810307  | -0.636385227 | 16.03247147 |
| OR8B3:CCDS31709.1     | -1.597114933 | -0.254743711 | 15.9945158  |
| IL31RA:CCDS56365.1    | -1.077297314 | 1.392627887  | 15.99220422 |
| MYBPC1:CCDS9085.1     | -1.367090771 | 3.149428218  | 15.99210154 |
| CASQ2:CCDS884.1       | -1.781154877 | 1.286104919  | 15.96255994 |
| OSCAR:CCDS12875.1     | -0.948527322 | 0.31677158   | 15.96175436 |
| IL15RA:CCDS7075.2     | -1.119243312 | 0.487137966  | 15.95934168 |
| EFCAB4B:CCDS44803.1   | -1.163492783 | 1.37160968   | 15.9592172  |
| MAGEB18:CCDS14216.1   | -1.577012917 | -0.251089366 | 15.95113834 |
| TMCO4:CCDS198.1       | -1.276938232 | 1.66633406   | 15.94276912 |
| MLIP:CCDS4954.1       | -0.889431023 | 1.814141335  | 15.93415331 |
| OR2D3:CCDS31417.1     | -1.590882388 | -0.569755799 | 15.93369137 |
| NRG2:CCDS54910.1      | -0.997818754 | 2.285091047  | 15.92293093 |
| GPR45:CCDS2066.1      | -1.326422795 | 0.394227933  | 15.91774434 |
| ESM1:CCDS3963.1       | -1.127348579 | -0.347332475 | 15.91597299 |
| IGSF11:CCDS2983.1     | -1.30091807  | 1.539399205  | 15.9158714  |
| ADH1A:CCDS3648.1      | -1.15560778  | 0.574767622  | 15.91194819 |
| DPEP2:CCDS10857.1     | -1.142071445 | 0.684095536  | 15.90453068 |
| SHROOM1:CCDS54902.1   | -0.793526165 | 1.912149703  | 15.90444703 |
| GABARAPL2:CCDS10921.1 | -0.661031952 | 5.993897002  | 15.90361793 |
| OR2A12:CCDS43670.1    | -1.6320139   | -0.565851431 | 15.89623756 |
| OR13D1:CCDS35094.1    | -1.683791946 | -0.721584168 | 15.88915306 |
| SSX4:CCDS35240.1      | -1.70098775  | -0.281918152 | 15.88392548 |
| GFAP:CCDS11491.1      | -2.16159208  | 4.916720158  | 15.88236057 |
| RHBDF2:CCDS32743.1    | -0.901805593 | 2.058430871  | 15.88185672 |

## TAUvsControls

|                        |              |              |             |
|------------------------|--------------|--------------|-------------|
| LMOD2:CCDS47693.1      | -1.61316533  | 1.140500422  | 15.87067976 |
| RSPO4:CCDS42846.1      | -1.565200492 | 0.285882159  | 15.86855897 |
| CXCR2:CCDS2408.1       | -1.671324283 | -0.319702298 | 15.86702703 |
| BZRAP1:CCDS45742.1     | -0.629206128 | 4.587775014  | 15.85751108 |
| PCDH15:CCDS44404.1     | -0.714596446 | 3.490176842  | 15.85200209 |
| GPR113:CCDS46238.1     | -0.985490684 | 1.9374933    | 15.84213038 |
| RHBF2:CCDS32744.1      | -0.902696055 | 2.024166453  | 15.84009097 |
| ECM1:CCDS954.1         | -0.930184537 | 3.929758263  | 15.83986555 |
| MYBPC1:CCDS55877.1     | -1.357375431 | 3.11186584   | 15.83309861 |
| OR4A47:CCDS31490.1     | -1.590823581 | -0.266067032 | 15.81675644 |
| EXOC3L4:CCDS32163.1    | -2.217787107 | 3.396659224  | 15.80765678 |
| NOSTRIN:CCDS54416.1    | -1.042719896 | 1.1628413    | 15.80078553 |
| OR4F4:CCDS32343.1      | -1.589362181 | -0.519605409 | 15.79831951 |
| CXorf22:CCDS14237.2    | -0.878585978 | 1.325930026  | 15.79799874 |
| PCDH15:CCDS44401.1     | -0.714494052 | 3.438273965  | 15.79726153 |
| LRRRC8E:CCDS12189.1    | -0.77647044  | 1.051467911  | 15.79005374 |
| BHLHE22:CCDS6179.1     | -1.158783976 | 2.660791408  | 15.77610291 |
| HFE:CCDS47386.1        | -1.476842889 | 0.940073162  | 15.77180785 |
| LYPD5:CCDS12631.1      | -1.20247084  | -0.114390452 | 15.7715582  |
| SLC2A14:CCDS8585.1     | -0.842849326 | 1.805476863  | 15.75584125 |
| WDR93:CCDS32326.1      | -0.911419924 | 1.288871546  | 15.73683693 |
| TRIM55:CCDS6187.1      | -1.682389096 | 1.541110104  | 15.72060793 |
| CA13:CCDS6236.1        | -1.102603783 | 0.427658847  | 15.71992174 |
| TMPRSS7:CCDS43129.2    | -0.990431408 | 1.309331463  | 15.71511473 |
| ADRB2:CCDS4292.1       | -1.104013706 | 0.198496372  | 15.71011044 |
| ASB9:CCDS55372.1       | -1.14245945  | 0.278352758  | 15.70656366 |
| HOXC4:CCDS8873.1       | -2.029742996 | 3.18986294   | 15.70608291 |
| PHF11:CCDS31975.1      | -1.185297576 | 1.038186844  | 15.70236604 |
| IL7:CCDS6224.1         | -1.622558769 | -0.287467902 | 15.70050488 |
| DMKN:CCDS54251.1       | -0.951081453 | 2.180085458  | 15.69850257 |
| LY75-CD302:CCDS56141.1 | -1.137938172 | 2.979287292  | 15.69521744 |
| FAP:CCDS33311.1        | -1.232783828 | 3.45195437   | 15.69497094 |
| PRTG:CCDS42040.1       | 1.678928045  | 4.561052821  | 15.69134611 |
| ABI3BP:CCDS46880.1     | -1.153726793 | 3.221040028  | 15.68915757 |
| ADRA1B:CCDS4347.1      | -1.55760012  | 1.200083187  | 15.6848671  |
| CASP1:CCDS8332.1       | -1.690242716 | -0.492353605 | 15.68436264 |
| FXVD4:CCDS7203.1       | -1.669091333 | -0.806286931 | 15.6821409  |
| OR51A7:CCDS31364.1     | -1.645873778 | -0.454701182 | 15.6713904  |
| SLC32A1:CCDS13307.1    | -1.3087625   | 3.541164958  | 15.65835032 |
| CDC42BPG:CCDS31601.1   | -0.993507992 | 2.604503293  | 15.65408581 |
| KRBOX1:CCDS54572.1     | -1.833399099 | -1.018612946 | 15.65281863 |
| OR5K2:CCDS33804.1      | -1.634906427 | -0.5008756   | 15.6499783  |
| TSHR:CCDS55935.1       | -1.698475073 | 0.540190794  | 15.64271388 |
| OR5M8:CCDS31533.1      | -1.626714725 | -0.685043085 | 15.63667902 |
| RBMS2:CCDS8923.1       | 0.858225557  | 3.302045676  | 15.62306447 |
| SHROOM1:CCDS4161.1     | -0.790754161 | 1.893857716  | 15.61219941 |
| GPR52:CCDS30941.1      | -1.080969338 | 0.098407884  | 15.61180063 |
| MYL7:CCDS5478.1        | -1.208363164 | 0.739951106  | 15.61048189 |
| KLK14:CCDS12823.2      | -1.502652993 | 0.096334466  | 15.60158834 |
| OR51L1:CCDS31369.1     | -1.581980969 | -0.228391181 | 15.58804457 |
| OR1L4:CCDS35129.1      | -1.610727154 | -0.497387205 | 15.58442941 |

## TAUvsControls

|                     |              |              |             |
|---------------------|--------------|--------------|-------------|
| PTGER1:CCDS12309.1  | -1.109160982 | 0.129905535  | 15.57449465 |
| IGSF11:CCDS46891.1  | -1.298632402 | 1.594403344  | 15.56788696 |
| OR2G6:CCDS31119.1   | -1.568140899 | -0.531275908 | 15.56169102 |
| CLEC7A:CCDS41754.1  | -1.63139146  | 0.056703622  | 15.54487263 |
| SLC28A1:CCDS10335.1 | -1.331893979 | -0.435462725 | 15.54120261 |
| EBF1:CCDS4343.1     | 0.746113953  | 4.544697389  | 15.53515068 |
| GIMAP5:CCDS5907.1   | -1.612971521 | -0.213703073 | 15.53373079 |
| ANP32E:CCDS44215.1  | 1.058272718  | 4.291049111  | 15.53005414 |
| FAM181B:CCDS31648.1 | -1.126783891 | 3.521246636  | 15.52089978 |
| ABHD6:CCDS2887.1    | -0.958344225 | 3.757627554  | 15.52007819 |
| COL8A1:CCDS2934.1   | -2.030674307 | 3.4714131    | 15.51833122 |
| GPD1:CCDS8799.1     | -1.013366495 | 0.810938017  | 15.51279422 |
| SAT1:CCDS14207.1    | 0.888886303  | 5.460077398  | 15.50271349 |
| SSX2:CCDS14344.1    | -1.600204929 | -0.303411837 | 15.50070313 |
| SFTPD:CCDS7362.1    | -0.974821041 | 1.11192733   | 15.48689    |
| ACSL5:CCDS7573.1    | -0.979876524 | 1.541341637  | 15.4787113  |
| KCNK5:CCDS4841.1    | -1.019483926 | 0.599744132  | 15.47675938 |
| CHAC2:CCDS33196.1   | -1.016613822 | 1.619066479  | 15.47029922 |
| BZRAP1:CCDS11605.1  | -0.621194526 | 4.619924052  | 15.4681251  |
| HR:CCDS6023.1       | -1.063216443 | 2.494575191  | 15.46453721 |
| PTPN13:CCDS47096.1  | 0.826834731  | 5.613678222  | 15.4595747  |
| CHRD1:CCDS48148.2   | -0.791004765 | 3.296855005  | 15.45940899 |
| NTM:CCDS44778.1     | -0.853721784 | 5.012341712  | 15.45444177 |
| GLYATL3:CCDS47440.1 | -1.553599527 | 1.297221163  | 15.44890655 |
| OR4F15:CCDS32342.1  | -1.601376445 | -0.418502967 | 15.43779925 |
| GNAZ:CCDS13804.1    | -0.94133569  | 5.19879964   | 15.43736108 |
| OPRM1:CCDS47507.1   | -1.004224059 | 0.934177276  | 15.43723438 |
| OR6C74:CCDS31816.1  | -1.604344326 | -0.615531677 | 15.43619772 |
| ZFH3:CCDS10908.1    | 0.893818478  | 6.452214875  | 15.42268936 |
| FMN1:CCDS45209.1    | -0.902153649 | 2.143494958  | 15.4211885  |
| LACRT:CCDS8883.1    | -1.682762266 | -0.498573559 | 15.41968703 |
| VN1R4:CCDS33099.1   | -1.65632338  | -0.699631005 | 15.41466467 |
| PITX1:CCDS4182.1    | -2.350633731 | 1.830741971  | 15.41263531 |
| ENPP2:CCDS6329.1    | 0.965542238  | 5.719064271  | 15.4105363  |
| HOXA1:CCDS5401.1    | -1.009130328 | 0.252243357  | 15.40558695 |
| FOXO4:CCDS55440.1   | -0.706589785 | 2.622177779  | 15.39961295 |
| IL17B:CCDS4297.1    | -2.47146559  | 0.186235817  | 15.38685665 |
| IGFL2:CCDS46121.1   | -1.046915333 | -0.520693506 | 15.38604848 |
| SEMA7A:CCDS53958.1  | -0.652002943 | 4.424371591  | 15.38454444 |
| FAM5C:CCDS1373.1    | -0.98894256  | 3.32036332   | 15.38300898 |
| OR8K1:CCDS31528.1   | -1.632865486 | -0.799328268 | 15.3818089  |
| SALL3:CCDS12013.1   | -0.959849631 | 3.063557989  | 15.38154    |
| C4orf22:CCDS3587.1  | -1.279104968 | 0.002212589  | 15.37485187 |
| OR52E4:CCDS31401.1  | -1.604221136 | -0.654633561 | 15.36979288 |
| NTM:CCDS8491.1      | -0.847066868 | 5.17704363   | 15.36797305 |
| ZNF233:CCDS33047.1  | -0.964701794 | 1.289582806  | 15.36631881 |
| FAM179A:CCDS1769.2  | -1.101958333 | 1.991169098  | 15.3599951  |
| ATP10A:CCDS32178.1  | -0.827730059 | 2.863368462  | 15.34920985 |
| CABP4:CCDS8166.1    | -1.050441708 | -0.171932367 | 15.34672891 |
| SIRPB1:CCDS46571.1  | -0.974185968 | 2.373019279  | 15.34362852 |
| OTOR:CCDS13124.1    | -1.587280037 | -0.55876596  | 15.34016795 |

## TAUvsControls

|                        |              |              |             |
|------------------------|--------------|--------------|-------------|
| GOLGA7B:CCDS31265.1    | -1.248887947 | 2.398770164  | 15.33704138 |
| CP:CCDS3141.1          | -1.043425014 | 3.512553456  | 15.32564803 |
| BMP2:CCDS13099.1       | -0.967659083 | 1.554317559  | 15.32322341 |
| GLRX2:CCDS1380.1       | -0.884432614 | 0.870048981  | 15.31519952 |
| NTRK2:CCDS35052.1      | 0.915058318  | 6.138602046  | 15.31387426 |
| PHF11:CCDS41887.1      | -1.1824845   | 0.922934012  | 15.30698807 |
| NTRK2:CCDS35051.1      | 0.909594895  | 6.157506379  | 15.30280528 |
| ELFN2:CCDS33642.1      | -0.935656242 | 3.489192458  | 15.30131256 |
| TMEM179:CCDS9988.1     | -0.837205233 | 1.529086984  | 15.30018954 |
| OR1L6:CCDS35130.2      | -1.570644653 | -0.522686403 | 15.2989294  |
| SYT17:CCDS10575.1      | -0.8258386   | 3.351700654  | 15.29842892 |
| UGT3A1:CCDS54841.1     | -1.596501878 | -0.456089471 | 15.29692503 |
| PRSS8:CCDS45469.1      | -0.960441677 | 0.604636936  | 15.29432229 |
| SLC2A12:CCDS5169.1     | -0.822939625 | 2.066884131  | 15.29030698 |
| TG:CCDS34944.1         | -1.318156272 | 3.355623352  | 15.28895172 |
| SLC5A12:CCDS7860.2     | -1.605852876 | 0.988437084  | 15.27560455 |
| OR5H2:CCDS33801.1      | -1.569564448 | -0.321681542 | 15.27517596 |
| SEMA7A:CCDS53959.1     | -0.630599348 | 4.634145446  | 15.26633961 |
| ANKK1:CCDS44734.1      | -0.955789323 | 0.923287202  | 15.26593854 |
| RASGRP4:CCDS54263.1    | -0.928392115 | 1.425731471  | 15.26558577 |
| PKD2L1:CCDS7492.1      | -0.972709009 | 1.688709938  | 15.26472928 |
| P2RY14:CCDS3156.1      | -1.252355501 | -0.116643822 | 15.25524448 |
| OR5V1:CCDS4657.1       | -1.550452041 | -0.441754227 | 15.24484617 |
| ENPP2:CCDS47914.1      | 0.97051847   | 5.71646516   | 15.2435549  |
| NAA11:CCDS47084.1      | -1.611264417 | -0.471641557 | 15.24213086 |
| OR5T3:CCDS31524.1      | -1.603818972 | -0.368339069 | 15.23957903 |
| STOX1:CCDS44416.1      | -1.302274474 | -0.297879435 | 15.23905007 |
| OPRM1:CCDS47506.1      | -0.997238664 | 0.849555235  | 15.23376005 |
| PLEKHB1:CCDS44674.1    | -1.015984516 | 2.615802168  | 15.22701678 |
| CA2:CCDS6239.1         | -0.970816427 | 3.244607427  | 15.21215325 |
| AQP1:CCDS5431.1        | -1.080518226 | 1.807476408  | 15.2089876  |
| OSCAR:CCDS12873.1      | -0.914169533 | 0.444297269  | 15.20486478 |
| HYLS1:CCDS8467.1       | -1.212364197 | 0.430298816  | 15.19923371 |
| FXR1:CCDS33894.1       | 0.702817199  | 6.096929143  | 15.19155587 |
| TRIM55:CCDS6184.1      | -1.643256424 | 1.517894515  | 15.1755039  |
| OR2S2:CCDS6596.2       | -1.563906684 | -0.47465846  | 15.16934622 |
| ADRB1:CCDS7586.1       | -1.042498994 | 0.935635247  | 15.16871035 |
| MCF2:CCDS55515.1       | -0.821285369 | 1.960966288  | 15.15914859 |
| UBE2QL1:CCDS47189.1    | -0.917785404 | 3.218831133  | 15.15674921 |
| VSX1:CCDS13168.1       | -1.09386873  | 0.669522713  | 15.15103307 |
| KLHDC4:CCDS10963.1     | 0.609406565  | 4.110820043  | 15.14919182 |
| C6orf99:CCDS55073.1    | -1.400310665 | -0.697844181 | 15.14786677 |
| ENPP6:CCDS3834.1       | -1.106505132 | 0.204454586  | 15.14603096 |
| LMO4:CCDS713.1         | -0.73147597  | 4.863771824  | 15.13741141 |
| CCDC54:CCDS2949.1      | -1.541104114 | -0.491758567 | 15.1262348  |
| LRAT:CCDS3789.1        | -1.536172008 | 0.057098492  | 15.1233023  |
| C10orf128:CCDS41519.1  | -1.606957258 | -0.123559551 | 15.10358778 |
| FXR1:CCDS3238.1        | 0.693552373  | 6.191574686  | 15.09921081 |
| IL10:CCDS1467.1        | -1.631976841 | -0.766668819 | 15.09748151 |
| LY75-CD302:CCDS56140.1 | -1.119551432 | 2.943337794  | 15.09597402 |
| PTPN13:CCDS47095.1     | 0.789729213  | 5.715663738  | 15.09390216 |

## TAUvsControls

|                     |              |              |             |
|---------------------|--------------|--------------|-------------|
| NTRK2:CCDS35053.1   | 0.937520396  | 6.121582636  | 15.09136626 |
| OR5P2:CCDS7782.1    | -1.575100379 | -0.358544683 | 15.0908495  |
| CTPS2:CCDS14175.1   | 0.849655825  | 4.520971923  | 15.08784757 |
| OPRM1:CCDS47505.1   | -0.975140287 | 0.829298862  | 15.0873171  |
| GPR139:CCDS32398.1  | -1.319789117 | -0.204003766 | 15.07225446 |
| RSPH10B:CCDS34598.1 | -1.202871491 | 1.752340401  | 15.07196668 |
| GZMM:CCDS12031.1    | -1.017852926 | -0.325071295 | 15.0717182  |
| OTUD6A:CCDS14395.1  | -1.704888273 | -0.064229128 | 15.07011641 |
| OTOF:CCDS1724.1     | -0.903690989 | 2.422399317  | 15.06948454 |
| TCTN3:CCDS31258.2   | 0.582594284  | 5.46761777   | 15.06250177 |
| RAPSN:CCDS7937.1    | -1.810503448 | 1.143325814  | 15.06115571 |
| SSX4:CCDS43934.1    | -1.698537602 | -0.480875609 | 15.06012665 |
| MUC15:CCDS44556.1   | -1.533086749 | -0.101679466 | 15.05993649 |
| OR11L1:CCDS31098.1  | -1.547591643 | -0.377542959 | 15.04677614 |
| SPHKAP:CCDS46537.1  | -1.305794042 | 3.312666753  | 15.04509925 |
| FAM107A:CCDS2892.1  | 0.785832656  | 3.64700566   | 15.04365582 |
| C3orf55:CCDS46943.1 | -1.619652618 | -0.341313652 | 15.042324   |
| IGLL5:CCDS54506.1   | -1.49788479  | 0.126052766  | 15.03750801 |
| DLX2:CCDS2248.1     | -1.10566904  | 2.167586302  | 15.02833791 |
| EFNA1:CCDS1092.1    | -0.932255519 | 2.348228903  | 15.02695957 |
| BST2:CCDS12358.1    | -1.409809423 | 3.086647593  | 15.02615987 |
| IL13:CCDS4157.1     | -1.609907494 | -0.345020828 | 15.019362   |
| TBC1D5:CCDS33714.1  | 0.703150077  | 4.693147611  | 15.01912033 |
| SPHKAP:CCDS33389.1  | -1.307050771 | 3.282257201  | 15.01751606 |
| DDN:CCDS31791.2     | -1.198241697 | 2.513906272  | 15.014642   |
| FCAR:CCDS12910.1    | -1.528127191 | -0.000543081 | 15.00724808 |
| SOCS2:CCDS9047.1    | -0.7840477   | 2.447416699  | 14.99649243 |
| SLC28A2:CCDS10121.1 | -1.844688008 | 1.629710871  | 14.99624961 |
| FXR1:CCDS46965.1    | 0.684510961  | 6.101190302  | 14.9935421  |
| PRR21:CCDS33417.1   | -1.870848175 | 0.241376334  | 14.99106406 |
| ENPP2:CCDS34936.1   | 0.961441521  | 5.692742854  | 14.99006658 |
| NTF3:CCDS8538.1     | -0.929654202 | 0.634221797  | 14.98745162 |
| OPALIN:CCDS41556.1  | -1.691629905 | -0.712941415 | 14.9837694  |
| P2RY12:CCDS3159.1   | -1.259437976 | -0.090189921 | 14.97699217 |
| SPZ1:CCDS43336.1    | -1.940679242 | 0.577183555  | 14.97666055 |
| TACR2:CCDS7293.1    | -1.157783637 | 0.221860549  | 14.97153488 |
| TXN2:CCDS13928.1    | 0.935387833  | 4.900176386  | 14.97012612 |
| BHLHA9:CCDS45560.1  | -1.587476623 | -0.578015718 | 14.96885013 |
| FCRLA:CCDS53420.1   | -1.593619078 | -0.245941024 | 14.96443825 |
| GPR162:CCDS8563.1   | -0.864625721 | 5.336922359  | 14.95686107 |
| ADH4:CCDS34032.1    | -1.526781705 | 0.591015725  | 14.95338975 |
| HLA-DPB1:CCDS4765.1 | -0.943414101 | 1.45344403   | 14.95068991 |
| PDE1C:CCDS55099.1   | -0.689325072 | 2.706417001  | 14.94605236 |
| CLEC7A:CCDS8614.1   | -1.604281227 | -0.270501578 | 14.94491705 |
| OR4K5:CCDS32024.1   | -1.583600727 | -0.61673751  | 14.94272219 |
| OR9A2:CCDS34767.1   | -1.671563806 | -0.686570263 | 14.9328295  |
| CSF2:CCDS4150.1     | -1.549880519 | -0.682215664 | 14.93013692 |
| COL11A2:CCDS54992.1 | -1.294741654 | 1.284459493  | 14.91924196 |
| DNAH3:CCDS10594.1   | -0.727550924 | 3.565654959  | 14.91027606 |
| CDKN2B:CCDS6512.1   | -1.26253307  | 0.357647061  | 14.88917905 |
| CD74:CCDS34276.1    | -1.07453659  | 1.074428942  | 14.88803834 |

## TAUvsControls

|                       |              |              |             |
|-----------------------|--------------|--------------|-------------|
| OR5B12:CCDS31551.1    | -1.536775151 | -0.19482667  | 14.88117106 |
| C10orf120:CCDS31302.1 | -1.624638833 | -0.161060633 | 14.87983856 |
| KLHDC4:CCDS54051.1    | 0.597601292  | 4.010953342  | 14.87758389 |
| ARPP21:CCDS43063.1    | -1.458834389 | 0.711252103  | 14.87486594 |
| ANGPTL7:CCDS128.1     | -0.702073334 | 2.404268745  | 14.87167034 |
| FGFBP2:CCDS3419.1     | -2.141219761 | 0.112644985  | 14.87151143 |
| RNF166:CCDS10969.1    | -0.701490307 | 3.221475359  | 14.86847259 |
| A4GALT:CCDS14041.1    | -1.198402683 | 1.088694463  | 14.86506343 |
| CLVS1:CCDS6176.1      | -0.857857534 | 2.671952011  | 14.86268097 |
| TXLNA:CCDS353.1       | 0.71502312   | 5.446682826  | 14.86058254 |
| PITX3:CCDS7532.1      | -1.368726422 | 0.663615868  | 14.85138838 |
| RCAN1:CCDS13637.1     | -0.855379563 | 3.993789262  | 14.84222166 |
| OR10AD1:CCDS31787.1   | -1.184563691 | -0.410374479 | 14.8392178  |
| TBC1D5:CCDS46770.1    | 0.706695008  | 4.73254561   | 14.82975399 |
| TSPAN2:CCDS881.1      | -0.929304648 | 1.273157313  | 14.82816343 |
| GYPA:CCDS34069.1      | -1.598903123 | 0.223044263  | 14.82570828 |
| TAAR2:CCDS34541.1     | -1.522945551 | 0.550610961  | 14.8247267  |
| EIF3A:CCDS7608.1      | 0.752021061  | 7.312836074  | 14.81419237 |
| FOLR1:CCDS8211.1      | -1.333614521 | 1.947608406  | 14.81347309 |
| AQP4:CCDS11889.1      | -1.538151865 | 0.779980166  | 14.81289144 |
| FAM129C:CCDS12362.1   | -0.990914486 | 1.734379085  | 14.81270404 |
| GRB7:CCDS56028.1      | -1.08565135  | 1.464394648  | 14.80917701 |
| GPR32:CCDS12801.1     | -1.238552204 | -0.283339551 | 14.80295764 |
| TGFBI:CCDS47266.1     | -1.316803466 | 7.762392275  | 14.7944414  |
| GPR162:CCDS44819.1    | -0.859125593 | 4.871547221  | 14.79006353 |
| NOXRED1:CCDS45142.1   | -0.937068925 | 0.057669901  | 14.78605059 |
| RND1:CCDS8771.1       | -0.895319101 | 2.704947696  | 14.78424561 |
| IL2RA:CCDS7076.1      | -1.546875365 | 0.011725931  | 14.77619997 |
| SLC16A11:CCDS11086.1  | -0.893576656 | 0.40887338   | 14.77275435 |
| MAFG:CCDS11793.1      | -0.891251817 | 2.300818008  | 14.76682271 |
| OR52R1:CCDS31360.2    | -1.559543039 | -0.247501412 | 14.75432817 |
| CHRD1:CCDS48149.1     | -0.771209337 | 3.665645336  | 14.7496185  |
| PTPN13:CCDS47093.1    | 0.7778366    | 5.733895738  | 14.74694031 |
| PTPN13:CCDS47094.1    | 0.779143041  | 5.733234897  | 14.74427497 |
| CHRD1:CCDS14553.1     | -0.772176935 | 3.661707072  | 14.74315664 |
| OTX1:CCDS1873.1       | -0.914916786 | 2.232171757  | 14.74180318 |
| PCSK9:CCDS603.1       | 1.360404445  | 3.96063668   | 14.73743756 |
| TRIM55:CCDS6185.1     | -1.599206522 | 1.331198451  | 14.73144427 |
| IGSF23:CCDS54277.1    | -1.566445787 | -0.498405187 | 14.72647144 |
| OPRM1:CCDS55069.1     | -0.994872185 | 0.849245084  | 14.72008072 |
| KLRG1:CCDS8599.1      | -1.241503373 | 0.080124082  | 14.71400015 |
| FLT1:CCDS53860.1      | -0.979798823 | 2.16380492   | 14.7048357  |
| CHRD1:CCDS48150.1     | -0.771156012 | 3.664520267  | 14.69234746 |
| HNRNPA1:CCDS44909.1   | 0.936577077  | 10.08933928  | 14.68798728 |
| CLEC1B:CCDS41751.1    | -1.545088555 | -0.394303634 | 14.68410732 |
| PKP1:CCDS30966.1      | -1.55209972  | 1.725760947  | 14.67756228 |
| GDNF:CCDS54846.1      | -1.058540111 | -0.541347886 | 14.65350909 |
| TSHR:CCDS32131.1      | -1.662699218 | 0.472282426  | 14.65320621 |
| HRH2:CCDS47344.1      | -1.038910824 | 0.923721296  | 14.65180041 |
| RS1:CCDS14187.1       | -2.088176429 | 0.23732037   | 14.64173936 |
| LHX3:CCDS6995.1       | -1.923191475 | 0.958445021  | 14.6358015  |



## TAUvsControls

|                      |              |              |             |
|----------------------|--------------|--------------|-------------|
| ABI3:CCDS11546.1     | -0.933381688 | 0.24522128   | 14.63006915 |
| APOBEC3H:CCDS54531.1 | -1.300279507 | -0.574439847 | 14.62462447 |
| CRIP3:CCDS4894.2     | -1.082464195 | 0.045762994  | 14.62461313 |
| COL11A2:CCDS43452.1  | -1.08237937  | 4.005215356  | 14.61773722 |
| NR5A2:CCDS1401.1     | -1.065267278 | 0.677953311  | 14.61375388 |
| KDR:CCDS3497.1       | -1.067305491 | 3.60595918   | 14.60557362 |
| SUN3:CCDS34636.1     | -0.983369827 | 0.388999041  | 14.60500305 |
| CLEC4G:CCDS12185.1   | -1.37091374  | 0.136208553  | 14.5896432  |
| KCNJ4:CCDS13971.1    | -0.930362023 | 3.519683548  | 14.58254101 |
| CISD2:CCDS34040.1    | -0.834858177 | 4.003814286  | 14.58233616 |
| P2RY6:CCDS8220.1     | -1.009061205 | -0.13320573  | 14.57936715 |
| MITF:CCDS2913.1      | -0.765129636 | 1.686596902  | 14.5731329  |
| GIMAP7:CCDS5903.1    | -1.539528437 | -0.603900658 | 14.57155359 |
| NPY5R:CCDS3804.1     | -1.084800442 | 0.103745049  | 14.57124305 |
| SEC14L4:CCDS13878.1  | -0.951810354 | 1.172680242  | 14.57115774 |
| APOBEC3H:CCDS13985.1 | -1.293359207 | -0.558288806 | 14.56266826 |
| LGI1:CCDS7431.1      | -0.904397334 | 1.804280004  | 14.54612639 |
| TAS2R60:CCDS5885.1   | -1.647269685 | 0.103914993  | 14.5413636  |
| CDK5R1:CCDS11273.1   | -0.967597418 | 4.971704286  | 14.54007172 |
| CASS4:CCDS54475.1    | -1.069178629 | 0.41558037   | 14.53634577 |
| C15orf56:CCDS32197.1 | -1.504572313 | 0.357602132  | 14.53146097 |
| CACNA2D3:CCDS54598.1 | -0.72127451  | 3.817122145  | 14.53081963 |
| IL31RA:CCDS3970.2    | -1.081174067 | 1.461954037  | 14.52818841 |
| TULP2:CCDS12739.1    | -0.851289155 | 0.957079758  | 14.52788143 |
| ANP32E:CCDS946.1     | 1.028350024  | 4.627210926  | 14.52549614 |
| OPRM1:CCDS43517.1    | -0.92900436  | 0.792307151  | 14.5201323  |
| OR4F29:CCDS41220.1   | -2.570224567 | 1.773798901  | 14.51537403 |
| MITF:CCDS43107.1     | -0.764332649 | 1.675434043  | 14.51188773 |
| SEMA7A:CCDS10262.1   | -0.61163621  | 4.709321951  | 14.5088326  |
| GPR85:CCDS5758.1     | -0.957536597 | 1.300994763  | 14.50635724 |
| NTM:CCDS41733.1      | -0.847519888 | 5.165708318  | 14.49958515 |
| IFIH1:CCDS2217.1     | -1.369720821 | 2.205378983  | 14.49457505 |
| BST1:CCDS3416.1      | -0.784158532 | 1.423802742  | 14.49313507 |
| DLX6:CCDS47647.2     | -1.400705917 | 1.627817594  | 14.487128   |
| GNAT2:CCDS803.1      | -1.174963361 | 1.111360466  | 14.4841387  |
| ADORA1:CCDS1434.1    | -0.920284899 | 2.389513177  | 14.48212195 |
| ERVFRD-1:CCDS4519.1  | -1.264154978 | 0.720970854  | 14.48062863 |
| PRSS46:CCDS54576.1   | -1.569299505 | -0.712165988 | 14.48012859 |
| HNRNPA1:CCDS41793.1  | 0.930585451  | 10.03211645  | 14.46748921 |
| OR4L1:CCDS32029.1    | -1.573048441 | -0.468970204 | 14.46665787 |
| GRXCR2:CCDS34263.1   | -1.590794067 | -0.736567414 | 14.46491762 |
| ABI3:CCDS45725.1     | -0.921640437 | 0.218720553  | 14.46146159 |
| TCTN3:CCDS44461.1    | 0.58859125   | 5.096299213  | 14.45781991 |
| NTM:CCDS44777.1      | -0.825484889 | 5.258348985  | 14.45619688 |
| LRPPRC:CCDS33189.1   | 0.698114426  | 6.32505707   | 14.45562571 |
| CAPN9:CCDS31053.1    | -0.861803897 | 1.885160889  | 14.45395314 |
| ASB9:CCDS35208.1     | -1.085492838 | 0.56125807   | 14.44575337 |
| AMELX:CCDS14146.1    | -1.112887952 | 0.116724741  | 14.43931576 |
| EFNA1:CCDS1091.1     | -0.891136631 | 2.556219072  | 14.439051   |
| HPSE:CCDS54774.1     | -1.146188637 | 0.65027649   | 14.43617047 |
| TMC5:CCDS10577.1     | -0.868704662 | 1.454502429  | 14.4326666  |

## TAUvsControls

|                     |              |              |             |
|---------------------|--------------|--------------|-------------|
| ANP32E:CCDS44214.1  | 1.061104118  | 4.468236968  | 14.4237542  |
| KLRB1:CCDS8601.1    | -1.539942548 | -0.395009842 | 14.41826219 |
| OR2A7:CCDS55177.1   | -1.518071302 | -0.317946756 | 14.41560626 |
| CDK15:CCDS2350.1    | -1.097862674 | 0.675409067  | 14.41175248 |
| CCDC169:CCDS53863.1 | -1.05983677  | 0.142418002  | 14.40380341 |
| RBP5:CCDS8574.1     | -1.111874069 | -0.500724306 | 14.40288357 |
| USP9X:CCDS43930.1   | 0.696757191  | 6.700823709  | 14.40278512 |
| OR10G9:CCDS31703.1  | -1.559261569 | -0.191509581 | 14.39360525 |
| MXRA8:CCDS24.1      | -1.108698524 | 5.08340353   | 14.38457459 |
| EDN3:CCDS13477.1    | -1.737094929 | 0.698669696  | 14.37221093 |
| OTX2:CCDS9728.1     | -0.873574207 | 2.927572605  | 14.36847356 |
| OR5K4:CCDS33802.1   | -1.552122823 | -0.576371333 | 14.36765689 |
| OR6N2:CCDS30906.1   | -1.542751265 | -0.565232087 | 14.35747209 |
| LAIR2:CCDS12897.1   | -1.563559974 | -0.356167348 | 14.35712622 |
| ASB17:CCDS671.1     | -1.567236577 | -0.484771857 | 14.35627763 |
| USP9X:CCDS55403.1   | 0.6963187    | 6.698019903  | 14.35417393 |
| OR5AN1:CCDS31559.1  | -1.560917543 | -0.617399112 | 14.35124394 |
| OPRM1:CCDS47503.1   | -0.940644983 | 1.114942076  | 14.34924911 |
| PLXNA4:CCDS43647.1  | -0.986461199 | 2.723096715  | 14.33728149 |
| ZCWPW2:CCDS33723.1  | -0.980188739 | 0.7961115    | 14.32492339 |
| TMCO5A:CCDS10046.1  | -1.653220362 | 0.441288462  | 14.3223205  |
| FAM129C:CCDS42521.1 | -1.02639136  | 1.741973921  | 14.32187944 |
| PKNOX2:CCDS41730.1  | -0.658075205 | 4.171639807  | 14.32128051 |
| EGR2:CCDS7267.1     | -1.048315955 | 1.657703904  | 14.32107193 |
| FOXO4:CCDS43969.1   | -0.682680148 | 2.655166187  | 14.32048874 |
| CPD:CCDS56025.1     | 0.700223234  | 5.232792481  | 14.31699595 |
| YPEL3:CCDS45459.1   | -0.82586594  | 4.149471818  | 14.31620235 |
| IL36B:CCDS2109.1    | -1.608370295 | -0.74503513  | 14.31158999 |
| C11orf82:CCDS8263.1 | -0.903066401 | 1.889415284  | 14.30598891 |
| MYD88:CCDS2674.2    | -0.942509083 | 1.684871973  | 14.30484065 |
| MYD88:CCDS54565.1   | -0.945322467 | 1.694197764  | 14.29787817 |
| ACSM1:CCDS10587.1   | -0.898892338 | 1.21431446   | 14.29139529 |
| CERS3:CCDS10384.1   | -1.099552688 | 0.641111261  | 14.2876026  |
| ULBP2:CCDS5222.1    | -1.280563618 | 1.09228692   | 14.2797677  |
| MED31:CCDS11078.1   | -0.809141996 | 2.333331096  | 14.27780071 |
| PLXNA4:CCDS5826.1   | -0.966762904 | 2.739025508  | 14.26974662 |
| HPN:CCDS32993.1     | -1.111233042 | 0.799642227  | 14.26748702 |
| C3orf52:CCDS54620.1 | -0.9115094   | 0.276194215  | 14.24799221 |
| OTOF:CCDS1726.1     | -0.898563056 | 2.4154251    | 14.23677667 |
| DDX6:CCDS44751.1    | 0.713618389  | 5.450208367  | 14.23186947 |
| LLGL2:CCDS32733.1   | -0.87181782  | 2.800319925  | 14.23181653 |
| OR7G3:CCDS32899.1   | -1.265704745 | -0.492312478 | 14.23159793 |
| OR5K1:CCDS43115.1   | -1.531746247 | -0.514660911 | 14.22865249 |
| GZMK:CCDS3964.1     | -1.636248704 | -0.493254339 | 14.22428447 |
| PDE1C:CCDS5437.1    | -0.681024675 | 2.649305278  | 14.22309742 |
| CCL14:CCDS45652.1   | -1.637448586 | -0.747206499 | 14.22188939 |
| FGA:CCDS47152.1     | -1.640369187 | 0.996992497  | 14.22107205 |
| EFCAB5:CCDS54103.1  | -1.048753512 | 1.99651762   | 14.22104594 |
| GRAMD1C:CCDS54625.1 | -0.850295494 | 1.034254769  | 14.2196439  |
| SPESP1:CCDS10230.1  | -1.148689396 | -0.138196769 | 14.21925548 |
| P2RX7:CCDS9213.1    | -1.061493864 | 1.41599312   | 14.21765794 |

## TAUvsControls

|                      |              |              |             |
|----------------------|--------------|--------------|-------------|
| RNF11:CCDS556.1      | -0.709463705 | 4.809954686  | 14.21530924 |
| HOXB4:CCDS11529.1    | -1.950145902 | 2.893513196  | 14.20468534 |
| C1orf68:CCDS44226.1  | -1.577663979 | -0.45871257  | 14.19145629 |
| EDN3:CCDS13478.1     | -1.733683447 | 0.397343005  | 14.19107194 |
| RNF166:CCDS54057.1   | -0.709063422 | 2.802646499  | 14.18577845 |
| PROC:CCDS2145.1      | -1.156861896 | 0.833744523  | 14.18031161 |
| HAAO:CCDS33187.1     | -1.446841107 | 0.989369298  | 14.17153346 |
| NCR3:CCDS47402.1     | -1.219603351 | 0.108338864  | 14.15827986 |
| SLC27A6:CCDS4145.1   | -0.870888712 | 0.804257118  | 14.15376654 |
| LGR6:CCDS1424.1      | -1.182896476 | 2.015305053  | 14.15091297 |
| SEZ6:CCDS45638.1     | -1.073643795 | 6.356914471  | 14.14724079 |
| TRIM43:CCDS2015.1    | -0.985581967 | 0.151890672  | 14.1450253  |
| OR5M3:CCDS31532.1    | -1.515568392 | -0.136606699 | 14.14141974 |
| SEZ6:CCDS45639.1     | -1.071685101 | 6.35490147   | 14.12835908 |
| CYP4F3:CCDS12332.1   | -0.847069655 | 0.914958419  | 14.12234677 |
| COX4I2:CCDS13187.1   | -1.560193378 | -0.441214557 | 14.12096156 |
| TRIM55:CCDS6186.1    | -1.563456729 | 0.577259632  | 14.11951113 |
| SMC1A:CCDS14352.1    | 0.732014345  | 6.298458805  | 14.11174319 |
| TMEM151A:CCDS8133.1  | -1.039110951 | 2.847796766  | 14.08947353 |
| SUSD5:CCDS46787.1    | -0.994316066 | 1.772828311  | 14.08752786 |
| OR8A1:CCDS31712.1    | -1.486508801 | -0.352887804 | 14.08169443 |
| AMELX:CCDS14144.1    | -1.114484074 | 0.353504716  | 14.06249891 |
| LILRB3:CCDS46175.1   | -0.906281826 | 1.397162717  | 14.04918509 |
| IRF4:CCDS4469.1      | -1.035470658 | 0.701055275  | 14.04695947 |
| SLC25A31:CCDS3733.1  | -1.501306527 | 0.22734579   | 14.03369769 |
| SPG11:CCDS10112.1    | 0.597413711  | 5.414745464  | 14.0302682  |
| CPD:CCDS11257.1      | 0.680461895  | 5.302132281  | 14.02732436 |
| RASGRP2:CCDS31598.1  | -0.863052797 | 3.162819446  | 14.02558317 |
| HMGB4:CCDS30668.1    | -1.608741463 | -0.777585899 | 14.00993396 |
| FMOD:CCDS30976.1     | -1.958838616 | 3.739849487  | 14.00966712 |
| OR1L1:CCDS35127.2    | -1.542873491 | -0.492863815 | 14.00923272 |
| C3orf55:CCDS46942.1  | -1.643680622 | -0.714012497 | 14.00763306 |
| DTX1:CCDS9164.1      | -0.832408645 | 4.449727632  | 14.00499377 |
| CLEC7A:CCDS53744.1   | -1.571681297 | -0.22215563  | 14.00322248 |
| MRPL16:CCDS7976.1    | -0.566926754 | 3.259623167  | 13.99496489 |
| PLAT:CCDS6127.1      | -0.926675323 | 4.622315232  | 13.99331747 |
| MYB:CCDS55059.1      | -1.037063739 | 2.738657003  | 13.99174112 |
| DDO:CCDS5083.1       | -1.005461668 | -0.074673573 | 13.97474501 |
| OPN3:CCDS31072.1     | -0.621771133 | 2.662146507  | 13.97189177 |
| C19orf33:CCDS12511.1 | -0.959779204 | -0.196890135 | 13.96643172 |
| DEGS1:CCDS1540.1     | -0.722545135 | 4.229418702  | 13.96627738 |
| BAALC:CCDS6297.1     | -0.984854233 | 4.050274535  | 13.96538326 |
| RBP4:CCDS31249.1     | -1.001693555 | 1.820989309  | 13.95687782 |
| GPR26:CCDS7636.1     | -1.486244126 | 1.074313778  | 13.95500645 |
| TARM1:CCDS46173.1    | -1.575418644 | 0.058054307  | 13.95328088 |
| NRBF2:CCDS7268.1     | -0.729793873 | 3.192298815  | 13.95148971 |
| FNDC1:CCDS47512.1    | -1.512576253 | 4.760853772  | 13.94685604 |
| DENND2C:CCDS875.1    | -0.799288879 | 1.822528359  | 13.9234627  |
| NPAS4:CCDS8138.1     | -1.362746105 | 1.888689293  | 13.90888014 |
| RPH3AL:CCDS54059.1   | -0.773379891 | 1.651303365  | 13.90809195 |
| SAA2:CCDS44548.1     | -1.604024791 | -0.764023454 | 13.89961389 |

## TAUvsControls

|                      |              |              |             |
|----------------------|--------------|--------------|-------------|
| NOSTRIN:CCDS42772.1  | -1.002913368 | 1.036968903  | 13.89089382 |
| AKNA:CCDS6805.1      | 0.755894121  | 5.23055901   | 13.89044937 |
| NLRP7:CCDS46183.1    | -0.935971512 | 1.708396293  | 13.88509396 |
| VAMP4:CCDS53430.1    | -0.937268632 | 2.200280895  | 13.87799172 |
| LECT1:CCDS9437.1     | -1.012464341 | 0.128017191  | 13.87426883 |
| OR8H2:CCDS31518.1    | -1.562841162 | -0.630282856 | 13.8655393  |
| TMEM168:CCDS5757.1   | -0.691462927 | 2.601319124  | 13.86543263 |
| PLA2R1:CCDS42767.1   | -0.794864314 | 2.952990373  | 13.85677054 |
| RASGRP4:CCDS54262.1  | -0.897621693 | 1.163619084  | 13.85087752 |
| MYB:CCDS55062.1      | -1.075592268 | 2.543536858  | 13.84295079 |
| EPYC:CCDS31870.1     | -1.546742645 | 0.831735485  | 13.83819187 |
| VAMP4:CCDS1298.1     | -0.934275439 | 2.201861111  | 13.83581414 |
| UPP2:CCDS46435.1     | -0.97632827  | 0.451463156  | 13.82955864 |
| OPRM1:CCDS47508.1    | -0.927103849 | 0.72734706   | 13.8206204  |
| PLA2R1:CCDS33309.1   | -0.813901189 | 3.053907855  | 13.82027517 |
| MAPK4:CCDS42437.1    | -0.603222338 | 3.724517801  | 13.81980744 |
| IPO4:CCDS9616.1      | 0.67861975   | 6.156101298  | 13.81930325 |
| HOXA11:CCDS5411.1    | -1.905940094 | 1.088877893  | 13.81812881 |
| TRIM63:CCDS273.1     | -1.078501881 | 0.619061091  | 13.81091896 |
| PURG:CCDS34878.1     | -0.66020073  | 1.764435092  | 13.80450321 |
| C12orf73:CCDS44964.1 | -0.840619934 | 3.259755928  | 13.80169182 |
| LILRB3:CCDS33105.1   | -0.892289408 | 1.391271412  | 13.8009876  |
| MYB:CCDS47481.1      | -1.021224791 | 2.754908784  | 13.7927983  |
| NTF4:CCDS12754.1     | -0.968052556 | 0.603700385  | 13.78881212 |
| OTX2:CCDS41960.1     | -0.857148044 | 2.91549159   | 13.78789838 |
| LECT1:CCDS45051.1    | -1.014507496 | 0.115030939  | 13.78309609 |
| SAMD11:CCDS2.2       | -0.866543051 | 3.890502085  | 13.782896   |
| PCDH15:CCDS44400.1   | -0.693831843 | 3.362109386  | 13.77532136 |
| C7orf62:CCDS34678.1  | -1.566637199 | -0.638013539 | 13.77164197 |
| CLEC4F:CCDS1910.1    | -1.022137478 | 1.017278153  | 13.77084023 |
| LAPTM5:CCDS337.1     | -0.920433876 | 0.31826881   | 13.77001682 |
| OR2C1:CCDS10502.1    | -1.056930165 | -0.340370773 | 13.76681246 |
| CCDC109B:CCDS3683.2  | -0.779470168 | 2.801505691  | 13.76452177 |
| S100B:CCDS13736.1    | -1.541455494 | 3.201924452  | 13.75997106 |
| NMBR:CCDS5196.1      | -1.216582499 | 0.157025407  | 13.75799458 |
| DPT:CCDS1275.1       | -1.55459358  | -0.474972209 | 13.74669825 |
| LGR6:CCDS30971.1     | -1.173637989 | 2.082286941  | 13.74658025 |
| FAM26F:CCDS34519.1   | -1.081801862 | -0.047236053 | 13.74637565 |
| ASTL:CCDS33249.1     | -0.843322284 | 0.395656742  | 13.74601924 |
| JMJD6:CCDS42383.1    | -0.76366256  | 4.503021525  | 13.74345168 |
| PLAT:CCDS6126.1      | -0.912243697 | 4.693975183  | 13.73483697 |
| SPACA5B:CCDS35238.1  | -1.359990753 | -0.648226574 | 13.73433798 |
| PCDH15:CCDS44402.1   | -0.680213883 | 3.391745981  | 13.73081776 |
| MBL2:CCDS7247.1      | -1.567398449 | -0.492527263 | 13.72944566 |
| MSC:CCDS43746.1      | -1.585653072 | 0.958876097  | 13.69597955 |
| MYB:CCDS55058.1      | -1.017543378 | 2.744402787  | 13.69558357 |
| PTH2:CCDS12763.1     | -1.099235224 | -0.539649734 | 13.690098   |
| TRHR:CCDS6311.1      | -1.05193083  | -0.14149108  | 13.68991688 |
| MYB:CCDS55061.1      | -1.06884293  | 2.429960109  | 13.68731763 |
| TRIML1:CCDS3851.1    | -1.884065908 | 0.654920146  | 13.68130278 |
| FGF3:CCDS8195.1      | -1.59491572  | 0.011629415  | 13.68103297 |

## TAUvsControls

|                      |              |              |             |
|----------------------|--------------|--------------|-------------|
| SPG11:CCDS53939.1    | 0.589435767  | 5.324191694  | 13.67423118 |
| C2CD4B:CCDS32259.1   | -1.623092195 | 0.148018733  | 13.67390845 |
| NFKBIZ:CCDS2946.1    | -0.71834728  | 1.982132674  | 13.67306157 |
| CFHR2:CCDS30959.1    | -1.460658245 | 0.208792329  | 13.67143018 |
| ZC2HC1B:CCDS47495.1  | -1.490592416 | -0.374206755 | 13.66920572 |
| APOBEC3H:CCDS54530.1 | -1.1688524   | -0.48317685  | 13.64317549 |
| LGSN:CCDS55027.1     | -1.763078471 | -0.337470972 | 13.63276494 |
| MARCO:CCDS2124.1     | -0.860186911 | 1.075317633  | 13.63175679 |
| OR2A5:CCDS43668.1    | -1.546823182 | -0.720435757 | 13.62873878 |
| ODF3L2:CCDS12027.1   | -0.99996508  | -0.064953636 | 13.62509716 |
| SMG6:CCDS11016.1     | 0.604781707  | 6.066730633  | 13.62463469 |
| BAG2:CCDS4961.1      | -0.94222779  | 1.78390961   | 13.62341208 |
| ACSL3:CCDS2455.1     | 0.701967196  | 5.413175512  | 13.60460879 |
| PCDH15:CCDS7248.1    | -0.666535336 | 3.44048228   | 13.58936002 |
| KRT8:CCDS8841.1      | -1.105370026 | 6.286415389  | 13.5779373  |
| IHH:CCDS33380.1      | -0.857298943 | 0.123411068  | 13.56959032 |
| TTN:CCDS54422.1      | -0.893714568 | 6.438280262  | 13.5676246  |
| RIT2:CCDS11921.1     | -1.166331829 | 1.600880252  | 13.55273585 |
| SLC6A11:CCDS2602.1   | -1.224298096 | 2.577863935  | 13.55221229 |
| OR10G2:CCDS32047.1   | -1.501721772 | -0.538951079 | 13.54981051 |
| GPRC5D:CCDS8658.1    | -1.51990007  | 0.738471276  | 13.54414754 |
| CDK2AP1:CCDS9245.1   | -0.670260844 | 5.283279093  | 13.54052121 |
| ZFH3:CCDS54035.1     | 0.775395273  | 6.065362412  | 13.53840458 |
| TSPEAR:CCDS13712.1   | -0.849094365 | 1.399015599  | 13.53795758 |
| TTN:CCDS54423.1      | -0.89242194  | 6.435478227  | 13.53706723 |
| IGSF1:CCDS55491.1    | -0.886140267 | 2.911270086  | 13.53310151 |
| GRB2:CCDS11721.1     | -0.685862236 | 5.667935843  | 13.52740462 |
| TTN:CCDS54421.1      | -0.893182278 | 6.429763147  | 13.52433772 |
| C1orf177:CCDS44153.1 | -0.892768993 | 0.42236214   | 13.52275307 |
| MARCH4:CCDS33376.1   | -1.000935274 | 3.516813978  | 13.51752773 |
| PCDH15:CCDS44403.1   | -0.663679367 | 3.418681423  | 13.51538683 |
| TCIRG1:CCDS53670.1   | -0.752713258 | 2.492886184  | 13.50947281 |
| LLGL2:CCDS11725.1    | -0.846265692 | 2.775466527  | 13.50555776 |
| TPO:CCDS1643.1       | -0.857352324 | 2.021778886  | 13.4944649  |
| IGSF1:CCDS14629.1    | -0.885298083 | 2.907336847  | 13.49070802 |
| DAO:CCDS9122.1       | -1.700340983 | 0.608395931  | 13.48950742 |
| C5orf64:CCDS54860.1  | -1.541841142 | -0.484218744 | 13.46875967 |
| C11orf85:CCDS31603.1 | -1.422160913 | 0.389384809  | 13.46675461 |
| RAET1G:CCDS43514.1   | -0.817354247 | 0.576063484  | 13.45985783 |
| SPACA5:CCDS14286.1   | -1.372401166 | -0.665966508 | 13.45250187 |
| SOWAHB:CCDS34017.1   | -0.798263486 | 1.003529853  | 13.44436351 |
| NDP:CCDS14262.1      | -1.153762565 | 1.349012538  | 13.44386076 |
| CFHR3:CCDS53453.1    | -1.650153229 | 0.08932911   | 13.43582117 |
| CIB3:CCDS12340.1     | -1.301458772 | -0.059810576 | 13.43532615 |
| CACNA1A:CCDS45998.1  | -0.978005181 | 4.576475132  | 13.42783482 |
| SPEM1:CCDS42254.1    | -1.053844844 | -0.048325854 | 13.42209579 |
| NPBWR2:CCDS13557.1   | -0.908785758 | -0.306961274 | 13.41340091 |
| FGF23:CCDS8526.1     | -1.524562968 | -0.604997146 | 13.41274444 |
| PRKCDBP:CCDS7762.1   | -0.920474271 | 0.138340347  | 13.40738565 |
| PTGS1:CCDS6842.1     | -0.922705588 | 1.93928079   | 13.40576268 |
| EFCAB3:CCDS45751.1   | -0.945020179 | 0.531020221  | 13.40245392 |

TAUvsControls

|                      |              |              |             |
|----------------------|--------------|--------------|-------------|
| BAALC:CCDS47906.1    | -1.100563679 | 2.876536501  | 13.39747375 |
| C1orf146:CCDS30772.1 | -1.549686847 | -0.743724716 | 13.39579602 |
| IL36A:CCDS42734.1    | -1.68263436  | -0.721399021 | 13.39383903 |
| G6PC2:CCDS46443.1    | -1.505853997 | -0.261231142 | 13.39334443 |
| PNPO:CCDS11522.1     | 0.692915071  | 2.635024721  | 13.39266901 |
| SPTB:CCDS32099.1     | -1.032163309 | 3.956778451  | 13.38652378 |
| TPSG1:CCDS10430.1    | -0.837981239 | 0.218534994  | 13.37494869 |
| RCAN1:CCDS33551.1    | -0.830626106 | 4.013996673  | 13.36800923 |
| RNF212:CCDS3345.1    | -1.196822485 | 0.777311169  | 13.36618954 |
| PRAMEF12:CCDS41254.1 | -0.953428804 | 0.019150516  | 13.36547581 |
| NLRP7:CCDS33109.1    | -0.92466581  | 1.647696319  | 13.36111505 |
| NTRK3:CCDS32323.1    | -0.750583399 | 4.134659465  | 13.3518155  |
| MMP10:CCDS8321.1     | -2.088490541 | 1.52998546   | 13.3487632  |
| KRTAP5-2:CCDS31331.1 | -1.141670569 | 0.800240842  | 13.31431392 |
| OR13G1:CCDS31094.1   | -1.523944378 | -0.655767773 | 13.31158086 |
| ZFP42:CCDS3849.1     | -1.475123732 | -0.508484818 | 13.30242038 |
| HOXD13:CCDS2264.2    | -1.172812732 | 0.383178642  | 13.29798615 |
| PAGE1:CCDS14327.1    | -1.314143995 | -0.646969379 | 13.29644349 |
| SPATA9:CCDS4076.1    | -1.064998485 | 0.322020844  | 13.29008486 |
| ERBB2:CCDS32642.1    | 0.821247104  | 7.200806879  | 13.28525097 |
| WNT16:CCDS5780.1     | -1.357864023 | 0.13850629   | 13.27921988 |
| CSMD3:CCDS6316.2     | -0.704240457 | 4.415503092  | 13.27907392 |
| IFITM3:CCDS41585.1   | -1.32030303  | 6.001549355  | 13.27168    |
| GCOM1:CCDS42043.1    | -0.928224438 | 1.806093081  | 13.26894987 |
| YPEL3:CCDS42147.1    | -0.796996994 | 4.17037044   | 13.26804939 |
| DPCR1:CCDS4692.2     | -0.94126239  | 1.792694881  | 13.26526797 |
| JMJD6:CCDS42384.1    | -0.749994857 | 4.47272214   | 13.2650524  |
| ZMYND12:CCDS53305.1  | -1.014736368 | 0.000405844  | 13.26240173 |
| TPO:CCDS1644.1       | -0.857212815 | 1.959959975  | 13.259643   |
| GJB6:CCDS9291.1      | -1.218441821 | -0.623812237 | 13.25764294 |
| CDH9:CCDS3893.1      | -1.038472972 | 1.387839654  | 13.234256   |
| KLHDC4:CCDS54050.1   | 0.576144343  | 3.948515388  | 13.2334064  |
| ZBTB32:CCDS12471.1   | -0.863513931 | 0.427680933  | 13.22590372 |
| KLRD1:CCDS8621.1     | -1.479205273 | -0.135122793 | 13.20837987 |
| AFAP1L1:CCDS54932.1  | -1.562690972 | 1.798129142  | 13.20590203 |
| OR8K5:CCDS31521.1    | -1.532683846 | -0.726394784 | 13.1933641  |
| MITF:CCDS46866.2     | -0.734430183 | 1.565196978  | 13.19302323 |
| CCDC74B:CCDS2155.1   | -1.395175197 | 5.069286453  | 13.19050517 |
| OPRM1:CCDS55070.1    | -0.922336435 | 0.791066765  | 13.18040462 |
| ERBB2:CCDS45667.1    | 0.820956756  | 7.187452608  | 13.16471164 |
| MOS:CCDS6164.1       | -1.441734304 | -0.240937603 | 13.16303088 |
| TAP1:CCDS4758.1      | -0.941718141 | 3.463448604  | 13.16047384 |
| S1PR4:CCDS12105.1    | -1.086494263 | -0.433223709 | 13.1562697  |
| GFPT2:CCDS43411.1    | -0.676835121 | 3.744746993  | 13.15406779 |
| C12orf71:CCDS44851.1 | -1.099396692 | -0.604502688 | 13.15397211 |
| TNNC2:CCDS13375.1    | -2.337911767 | 3.600018802  | 13.1535529  |
| LHX3:CCDS6994.1      | -1.816920028 | 0.858867895  | 13.1485123  |
| LDB3:CCDS53550.1     | -1.090457159 | 2.294002677  | 13.14302631 |
| DHRS7C:CCDS56020.1   | -1.783901835 | 0.533251132  | 13.14025329 |
| REN:CCDS30981.1      | -1.082633617 | 0.492848899  | 13.13797629 |
| KAT7:CCDS56035.1     | 0.59455452   | 5.133058522  | 13.13666947 |

## TAUvsControls

|                       |              |              |             |
|-----------------------|--------------|--------------|-------------|
| ELL3:CCDS10102.1      | -0.738850155 | 1.048865133  | 13.13529736 |
| NLRP7:CCDS12912.1     | -0.915412953 | 1.664597855  | 13.13158783 |
| RNF148:CCDS47692.1    | -0.968522988 | -0.358813217 | 13.12978201 |
| CDKN2D:CCDS12244.1    | -1.121313398 | 5.106442471  | 13.12580064 |
| PRDX6:CCDS1307.1      | 0.696031334  | 6.849274969  | 13.11203782 |
| ACSM3:CCDS10589.1     | -0.886104649 | 1.412620493  | 13.10021241 |
| SRCRB4D:CCDS5585.1    | -0.804579136 | 1.411111932  | 13.09097727 |
| GFRA3:CCDS4201.1      | -1.005108554 | 0.98350862   | 13.08322526 |
| CYBA:CCDS32504.1      | -0.970027045 | 2.880987401  | 13.08264622 |
| SEPT12:CCDS10522.1    | -0.836203226 | 0.51344372   | 13.08219187 |
| CDRT15L2:CCDS54096.1  | -1.484600526 | 0.746563294  | 13.07213527 |
| OAS2:CCDS44982.1      | -1.534493593 | -0.728244529 | 13.07128018 |
| KRTAP4-7:CCDS45673.1  | -1.599074133 | -0.223923667 | 13.06863841 |
| KLRF2:CCDS53743.1     | -1.536912183 | -0.708199354 | 13.0668716  |
| SLC1A7:CCDS574.1      | -1.178438617 | 2.055420462  | 13.06349106 |
| CSMD3:CCDS6317.1      | -0.694081891 | 4.449837776  | 13.06000017 |
| C4orf40:CCDS3535.1    | -1.457709913 | -0.508220629 | 13.05201073 |
| BCAR3:CCDS745.1       | -0.658643436 | 3.963765313  | 13.05118413 |
| ALPK2:CCDS11966.2     | -1.150093492 | 3.113592119  | 13.04657765 |
| IRGC:CCDS12629.1      | -1.246739567 | 0.734498659  | 13.04527673 |
| ANGPTL5:CCDS8312.1    | -1.541699372 | 0.294431177  | 13.03991392 |
| ZNF280A:CCDS13800.1   | -1.127558656 | 0.40730286   | 13.03902831 |
| PNP:CCDS9552.1        | -0.824173812 | 3.808376848  | 13.03582574 |
| ALDH1A2:CCDS55968.1   | -1.53864684  | 2.923791565  | 13.02767882 |
| CSMD3:CCDS6315.1      | -0.696581346 | 4.44867056   | 13.02178584 |
| TNFRSF12A:CCDS10489.1 | -0.945042358 | 3.314503526  | 13.01908146 |
| CORO2A:CCDS6735.1     | -0.770914345 | 2.582356653  | 13.00934632 |
| BTG3:CCDS46636.1      | -0.672075245 | 4.739438407  | 13.00863573 |
| WDR52:CCDS2972.1      | -0.93903046  | 1.892135531  | 13.00553668 |
| OR6K2:CCDS30902.1     | -1.433565449 | -0.059641673 | 13.00399334 |
| TDGF1:CCDS2742.1      | -1.482162204 | -0.601271348 | 13.00186624 |
| GZMH:CCDS9632.1       | -1.538262235 | 0.686963883  | 12.99285734 |
| MB:CCDS13917.1        | -0.948341754 | -0.397484257 | 12.99024392 |
| DNAH9:CCDS11160.1     | -0.705479549 | 3.976109576  | 12.98867139 |
| WNT8A:CCDS43368.1     | -1.060448368 | 0.146411205  | 12.98021841 |
| KRT40:CCDS42320.1     | -1.134688264 | 0.895665656  | 12.97858128 |
| WNT16:CCDS5781.1      | -1.364876101 | 0.188928273  | 12.97653155 |
| GJB2:CCDS9290.1       | -1.230606822 | 0.278397139  | 12.97568296 |
| OPRM1:CCDS47504.1     | -0.925389555 | 0.79232105   | 12.97504309 |
| ZG16B:CCDS10479.2     | -1.170896243 | -0.617149592 | 12.97459142 |
| LRRC7:CCDS645.1       | -0.86867488  | 2.958854546  | 12.97364509 |
| KCNJ3:CCDS2200.1      | -1.088910783 | 1.586868872  | 12.9713444  |
| RPH3AL:CCDS10994.1    | -0.734989413 | 1.828052006  | 12.97009608 |
| NKX2-1:CCDS41945.1    | -1.755979414 | 0.590597338  | 12.96480753 |
| TRIM34:CCDS31391.1    | -0.934441877 | 1.211840144  | 12.95450361 |
| CACNA1F:CCDS35253.1   | -1.286567369 | 2.918111571  | 12.95098768 |
| DGKG:CCDS3274.1       | -0.991184468 | 2.122434684  | 12.93568514 |
| OR1J1:CCDS35120.1     | -1.445673054 | -0.261230613 | 12.9333369  |
| KAT7:CCDS11554.1      | 0.596324797  | 5.233606545  | 12.92948314 |
| RBM3:CCDS14301.1      | 0.862670297  | 6.148748565  | 12.92765148 |
| DNAH12:CCDS33771.1    | -0.758460842 | 0.676709806  | 12.91772804 |

## TAUvsControls

|                      |              |              |             |
|----------------------|--------------|--------------|-------------|
| OR7D4:CCDS32901.1    | -1.228047441 | -0.282366789 | 12.91119491 |
| NONO:CCDS14410.1     | 0.694503093  | 8.66531898   | 12.91094764 |
| SHOX:CCDS14107.1     | -1.167496839 | 1.732030294  | 12.90870663 |
| CLDN1:CCDS3295.1     | -1.252217676 | 2.165291167  | 12.90788387 |
| SFTPA1:CCDS44444.2   | -0.879524812 | 0.362404658  | 12.90059264 |
| KCTD13:CCDS10661.1   | -0.691997466 | 4.661111841  | 12.89810049 |
| C16orf93:CCDS55993.1 | 0.980422711  | 2.606367174  | 12.88932854 |
| ORM1:CCDS6803.1      | -1.081510683 | -0.303104235 | 12.88338334 |
| OR7G1:CCDS32898.2    | -1.295730162 | -0.559457048 | 12.87984042 |
| MX1:CCDS13673.1      | -0.857685229 | 1.778999464  | 12.87402778 |
| HRH2:CCDS4395.1      | -0.960586075 | 0.827015258  | 12.87019485 |
| OR4C46:CCDS31498.1   | -1.505011747 | -0.693958752 | 12.86961328 |
| THAP1:CCDS6136.1     | -0.631326993 | 1.860983532  | 12.86743898 |
| SLC31A2:CCDS6788.1   | -0.892651807 | 0.488353749  | 12.86568376 |
| GPR39:CCDS2170.1     | -0.797896878 | 4.596291925  | 12.86124852 |
| GLP1R:CCDS4839.1     | -0.946783755 | 1.021024722  | 12.84945681 |
| DBNDD1:CCDS42223.1   | -1.776431535 | 6.04851651   | 12.84823071 |
| FAM83H:CCDS6410.2    | -0.840486254 | 2.122185751  | 12.83905896 |
| LHX4:CCDS1338.1      | -1.173766012 | 1.958688547  | 12.83767551 |
| PKP1:CCDS30967.1     | -1.408479701 | 1.601995463  | 12.83569291 |
| HLF:CCDS11585.1      | -1.334936934 | 0.96504241   | 12.83539346 |
| KAT7:CCDS56038.1     | 0.602459611  | 4.892013344  | 12.83528956 |
| OR11H4:CCDS32034.1   | -1.484213387 | -0.519324213 | 12.83175433 |
| OR1A1:CCDS11022.1    | -1.47459511  | -0.198475277 | 12.82663934 |
| DUSP5:CCDS7566.1     | -1.1193598   | 2.718775519  | 12.82416153 |
| NAT2:CCDS6008.1      | -1.470208937 | -0.60118574  | 12.81743348 |
| TAS1R3:CCDS30556.1   | -0.856072339 | 1.574562533  | 12.81492392 |
| PIK3AP1:CCDS31259.1  | -0.98980435  | 1.704882915  | 12.8146126  |
| IL1F10:CCDS2112.1    | -1.477236414 | -0.650480142 | 12.81383973 |
| DPYSL2:CCDS6051.1    | 0.650682602  | 8.786466897  | 12.81105985 |
| PRB4:CCDS8641.1      | -1.482741862 | -0.424432826 | 12.80998282 |
| LYSMD2:CCDS10143.1   | -0.875517455 | 1.180105627  | 12.80826573 |
| AQP9:CCDS10165.1     | -1.566329218 | 1.072975745  | 12.80662907 |
| ZBED1:CCDS14118.1    | -0.619588215 | 5.565324211  | 12.80209904 |
| TAF13:CCDS30788.1    | 0.723090036  | 2.306484332  | 12.7934808  |
| B2M:CCDS10113.1      | -0.930873029 | 5.104561889  | 12.79029667 |
| ECM1:CCDS953.1       | -0.837550578 | 4.163838662  | 12.7800962  |
| KCNJ16:CCDS11687.1   | -0.957120587 | 0.153078363  | 12.77934914 |
| ACTN2:CCDS1613.1     | -1.643360743 | 3.988451503  | 12.761239   |
| DEFB118:CCDS13177.1  | -1.632331409 | -0.505468438 | 12.76074433 |
| ISY1:CCDS43149.1     | 0.696103691  | 4.443842535  | 12.75578042 |
| ABLIM2:CCDS47016.1   | -0.864605834 | 3.128517325  | 12.74921935 |
| MS4A13:CCDS31571.1   | -1.575254605 | -0.258525661 | 12.74650531 |
| SEC63:CCDS5061.1     | 0.682082627  | 5.7743965    | 12.74093436 |
| NR4A3:CCDS6744.1     | -0.793096352 | 1.58896997   | 12.73747113 |
| MALSU1:CCDS5381.1    | -0.697076494 | 3.785844237  | 12.72793354 |
| ANO10:CCDS56249.1    | 0.686368585  | 3.751379174  | 12.72684464 |
| IL26:CCDS8981.1      | -1.507373621 | -0.589505194 | 12.72639367 |
| KAT7:CCDS56037.1     | 0.604460804  | 5.010105956  | 12.72123133 |
| TEX26:CCDS9339.1     | -1.142949865 | 0.023428852  | 12.71932647 |
| HRH4:CCDS45841.1     | -1.401574261 | 0.053317339  | 12.71534151 |



## TAUvsControls

|                       |              |              |             |
|-----------------------|--------------|--------------|-------------|
| PDHA2:CCDS3644.1      | -1.452055391 | -0.100711323 | 12.71218315 |
| STAT6:CCDS53804.1     | 0.780126579  | 4.23168327   | 12.7056406  |
| OR1N1:CCDS6844.1      | -1.434351491 | -0.318947204 | 12.70289918 |
| LDB3:CCDS7377.1       | -1.031034092 | 2.272836382  | 12.70010876 |
| SP140L:CCDS46538.1    | -0.957085255 | 1.866881901  | 12.69824331 |
| TFAP2D:CCDS4933.1     | -1.035847917 | 0.76461765   | 12.68789025 |
| SORCS1:CCDS7559.1     | -0.824991458 | 4.879289566  | 12.67349952 |
| PLSCR5:CCDS46931.1    | -1.157425862 | -0.293081116 | 12.66994659 |
| KCNIP2:CCDS7522.1     | -0.805809794 | 2.972006639  | 12.66789453 |
| SIM2:CCDS13646.1      | -1.023130412 | 1.149428641  | 12.66765611 |
| BOLA3:CCDS33224.1     | -0.849275878 | 2.590541349  | 12.66356362 |
| DBNDD1:CCDS10991.2    | -1.761001087 | 6.051696981  | 12.6576253  |
| NPVF:CCDS5395.1       | -1.088420735 | -0.659580023 | 12.65494174 |
| RAX2:CCDS12112.1      | -1.628508397 | -0.735787089 | 12.65029171 |
| KCNQ1:CCDS7736.1      | -0.897865949 | 1.964366402  | 12.64966574 |
| KIF12:CCDS6801.1      | -0.8971918   | 1.387962522  | 12.64383203 |
| MYB:CCDS5174.1        | -1.008150402 | 2.659991565  | 12.64346303 |
| IDAS:CCDS54853.1      | -0.85563283  | 0.344860544  | 12.64326287 |
| TJP1:CCDS45199.1      | 0.741935328  | 5.856069919  | 12.64053613 |
| SLC37A1:CCDS13689.1   | -0.8213864   | 4.372087177  | 12.63766769 |
| KAT7:CCDS56036.1      | 0.587469731  | 5.024127897  | 12.63376722 |
| DVL1:CCDS22.1         | -0.627345672 | 5.993753883  | 12.63045239 |
| BTG3:CCDS13569.1      | -0.693603224 | 4.604008216  | 12.62992978 |
| PTH1R:CCDS2747.1      | 0.872537594  | 3.621204045  | 12.62625657 |
| C1orf100:CCDS31079.1  | -1.45927715  | -0.497755364 | 12.62494028 |
| IGSF1:CCDS55490.1     | -0.869820582 | 2.88743209   | 12.62239719 |
| CALCA:CCDS7819.1      | -1.172944038 | -0.585708514 | 12.62093723 |
| ADAMTS18:CCDS10926.1  | -1.085761972 | 3.287774939  | 12.6186658  |
| MICAL2:CCDS7809.1     | -0.962990973 | 4.43477912   | 12.61866339 |
| GDNF:CCDS54845.1      | -0.966837697 | -0.345939768 | 12.61718922 |
| KCNIP2:CCDS7521.1     | -0.797927385 | 2.980914217  | 12.6171881  |
| APOL3:CCDS13922.1     | -1.054103333 | 0.679074657  | 12.61086916 |
| TNFRSF13B:CCDS11181.1 | -1.636622144 | 0.680577663  | 12.60830174 |
| MYB:CCDS55060.1       | -1.010465608 | 2.584029605  | 12.60269453 |
| FAM159B:CCDS47220.1   | -1.465939135 | -0.612811195 | 12.59607654 |
| SARDH:CCDS6978.1      | 0.761661988  | 3.688329648  | 12.5877733  |
| IGFN1:CCDS53455.1     | -1.143963599 | 3.290310898  | 12.578368   |
| CDH17:CCDS6260.1      | -0.834159662 | 1.220840745  | 12.57789265 |
| MCF2:CCDS55516.1      | -0.75103271  | 2.165847084  | 12.57657254 |
| FBXO15:CCDS45884.1    | -0.755527996 | 1.07462713   | 12.57586763 |
| DGKG:CCDS43181.1      | -0.974756485 | 2.05016861   | 12.57390341 |
| TFF2:CCDS13684.1      | -1.488899479 | -0.499317549 | 12.56238306 |
| ECM1:CCDS55632.1      | -0.825303837 | 4.16394458   | 12.55853537 |
| SMTNL2:CCDS11048.1    | -1.27457376  | 1.630501157  | 12.55721196 |
| SLC25A47:CCDS9959.1   | -0.919990779 | -0.022844717 | 12.55407578 |
| RAB17:CCDS2520.1      | -1.295056355 | 0.433728678  | 12.54946636 |
| SIM2:CCDS46647.1      | -1.008011511 | 1.022169719  | 12.54881816 |
| OR11H6:CCDS32033.1    | -1.473761902 | -0.710150803 | 12.54619938 |
| SHANK1:CCDS12799.1    | -0.64318192  | 5.631343828  | 12.54293801 |
| MYB:CCDS47482.1       | -1.004168772 | 2.648760624  | 12.53641722 |
| PLIN5:CCDS42473.1     | -0.908716972 | 0.950941974  | 12.53336386 |

## TAUvsControls

|                      |              |              |             |
|----------------------|--------------|--------------|-------------|
| AP4S1:CCDS45093.1    | -0.976211861 | 0.835426912  | 12.52916963 |
| ALPK3:CCDS10333.1    | -0.792758979 | 2.527900327  | 12.5094461  |
| RAD9B:CCDS9148.2     | -0.802673128 | 0.901182682  | 12.50686023 |
| OR2M4:CCDS31108.1    | -1.492090395 | -0.391086663 | 12.50305487 |
| ABLIM3:CCDS4294.1    | -0.880280858 | 4.548362033  | 12.50146895 |
| SPATA19:CCDS8493.1   | -1.050458592 | -0.194232903 | 12.48560438 |
| EBF4:CCDS46573.1     | -0.781865908 | 5.105370059  | 12.485098   |
| CCL3:CCDS11307.1     | -1.658939588 | -0.973307094 | 12.48206535 |
| C4orf26:CCDS3569.1   | -1.069155543 | -0.521273923 | 12.47862194 |
| C7orf63:CCDS43613.2  | -0.802396192 | 1.937716351  | 12.47756117 |
| NTF3:CCDS44806.1     | -0.804435437 | 0.815218334  | 12.47448122 |
| SULT6B1:CCDS33182.1  | -1.594854678 | 0.005314378  | 12.4702674  |
| OR5J2:CCDS31522.1    | -1.444960456 | -0.467015295 | 12.46983696 |
| PLA1A:CCDS56268.1    | -0.800077319 | 0.770340325  | 12.46942126 |
| IL11:CCDS12923.1     | -1.196903696 | 0.415345498  | 12.46161062 |
| IL20:CCDS1470.1      | -1.529543657 | -0.612138997 | 12.44856459 |
| KIF26A:CCDS45171.1   | -0.875551387 | 4.304057397  | 12.44460647 |
| PLAU:CCDS7339.1      | -1.195489642 | 3.302589536  | 12.44248521 |
| PDGFB:CCDS13987.1    | -0.982230262 | 2.340651762  | 12.42535088 |
| DLGAP2:CCDS47760.1   | -1.25607236  | 1.723236921  | 12.40012287 |
| IP6K2:CCDS2777.1     | -0.604751346 | 5.596418006  | 12.38488188 |
| LIF:CCDS13872.1      | -0.812710798 | 1.186527845  | 12.38320514 |
| PLA1A:CCDS2991.1     | -0.794994961 | 0.805869007  | 12.38166935 |
| TLR9:CCDS2848.1      | -0.614195132 | 1.552512513  | 12.37434363 |
| CLDN23:CCDS55195.1   | -1.003650289 | -0.426787634 | 12.36798808 |
| ZNRF1:CCDS10912.1    | -0.778455458 | 4.568746497  | 12.36664376 |
| GPR132:CCDS9997.1    | -1.040815646 | 0.140813358  | 12.35617914 |
| ARX:CCDS14215.1      | -0.911752658 | 2.763110162  | 12.35253202 |
| AMOT:CCDS14563.1     | 0.907463019  | 4.210208165  | 12.34359707 |
| KIAA1804:CCDS1598.1  | -0.68796623  | 2.037316283  | 12.34291195 |
| KLHL29:CCDS54335.1   | -0.831124694 | 3.981341658  | 12.34112068 |
| FCGR1B:CCDS30821.1   | -1.139028773 | 0.22557709   | 12.33188757 |
| EDN3:CCDS13479.1     | -1.68417967  | 0.664527784  | 12.33180456 |
| ITPRIPL1:CCDS33250.1 | -0.76052815  | 0.73165113   | 12.33009595 |
| RAPGEF3:CCDS41775.1  | -0.906507281 | 2.545904758  | 12.32949876 |
| TEX14:CCDS56042.1    | -0.880763469 | 2.59054177   | 12.32704878 |
| CELA1:CCDS8812.1     | -1.500744933 | -0.103728986 | 12.32215011 |
| MCF2:CCDS55517.1     | -0.748296901 | 2.187620219  | 12.31957019 |
| SIRPB1:CCDS42850.1   | -1.076914117 | -0.258734009 | 12.31882494 |
| TCERG1L:CCDS7662.2   | -1.817542549 | 2.556084104  | 12.29637521 |
| APOBEC3G:CCDS13984.1 | -0.965094327 | 0.85396445   | 12.28803871 |
| TAS2R8:CCDS8632.1    | -1.532153929 | -0.679657994 | 12.28486255 |
| LRR8D:CCDS726.1      | 0.538122021  | 4.419621805  | 12.284216   |
| TEX14:CCDS32693.1    | -0.878250203 | 2.588004908  | 12.28343282 |
| ARHGAP44:CCDS45616.1 | -0.755124369 | 3.945604105  | 12.28272866 |
| EPB41L5:CCDS2130.1   | 0.656513102  | 4.208809443  | 12.28267086 |
| TJP1:CCDS42007.1     | 0.730989111  | 5.887170197  | 12.279283   |
| GPR160:CCDS3211.1    | -1.718611939 | -0.28622078  | 12.27854258 |
| MCF2:CCDS14667.1     | -0.74333814  | 2.108553738  | 12.25963302 |
| FAM178B:CCDS46366.2  | -0.649655542 | 1.353645734  | 12.25826668 |
| CAMK2A:CCDS43386.1   | -0.842851713 | 3.640960747  | 12.24858187 |

## TAUvsControls

|                       |              |              |             |
|-----------------------|--------------|--------------|-------------|
| CLDN19:CCDS53306.1    | -0.951815536 | -0.087088914 | 12.24655065 |
| HBM:CCDS32347.1       | -1.502026837 | -0.951173463 | 12.24291249 |
| RAPGEF3:CCDS31784.1   | -0.905592813 | 2.465458322  | 12.23740403 |
| EPHA10:CCDS425.1      | -0.751216422 | 1.120287565  | 12.23158599 |
| DGKG:CCDS43182.1      | -0.964442108 | 2.074807343  | 12.23157354 |
| KCNF1:CCDS1676.1      | -1.001803344 | 3.121089756  | 12.23149308 |
| STAT6:CCDS8931.1      | 0.75364359   | 4.41599566   | 12.22209924 |
| NOX4:CCDS8285.1       | -0.822203181 | 1.815401559  | 12.22145147 |
| MS4A13:CCDS41653.1    | -1.585325257 | -0.559955382 | 12.22136374 |
| ALDH3B2:CCDS31622.1   | -1.027319422 | 0.168016287  | 12.21841627 |
| ZMYND12:CCDS467.1     | -0.888300781 | 0.455368022  | 12.21684367 |
| PLAU:CCDS44442.1      | -1.193256826 | 3.237052905  | 12.21427954 |
| RNF166:CCDS54056.1    | -0.675850393 | 2.69371783   | 12.21183744 |
| ITPRIPL1:CCDS54378.1  | -0.770251431 | 0.574655883  | 12.20941387 |
| KIFC3:CCDS45494.1     | -0.637264553 | 5.409065987  | 12.20786324 |
| REP15:CCDS31762.1     | -1.478748736 | -0.639249987 | 12.20576806 |
| ST8SIA5:CCDS11930.1   | -0.949541239 | 2.309290897  | 12.1950314  |
| C1orf110:CCDS44269.1  | -1.017779184 | -0.007604029 | 12.19359363 |
| ITPRIPL1:CCDS46360.1  | -0.765349309 | 0.766765832  | 12.1847826  |
| SLC18A1:CCDS47815.1   | -0.856890989 | 2.906732946  | 12.17490572 |
| OSGIN1:CCDS10939.1    | -0.870615615 | 1.80394762   | 12.17364684 |
| ENO3:CCDS11062.1      | -1.25864692  | 3.738033649  | 12.16716372 |
| EFCAB3:CCDS11632.1    | -0.914889992 | 0.321873169  | 12.16658983 |
| UTRN:CCDS34547.1      | 0.761917182  | 5.652046643  | 12.16578949 |
| SBNO1:CCDS9246.1      | 0.766577525  | 4.760423384  | 12.15789953 |
| GTF3A:CCDS45019.1     | -0.910256332 | 5.431664248  | 12.15729724 |
| PAICS:CCDS47060.1     | 0.628627175  | 6.043110573  | 12.15559294 |
| DRGX:CCDS44388.1      | -1.581183917 | 0.13924864   | 12.15250781 |
| SBNO1:CCDS53844.1     | 0.766654704  | 4.760793507  | 12.15132173 |
| KLRC1:CCDS8625.1      | -1.433390122 | -0.331568596 | 12.15054506 |
| RCAN1:CCDS42921.1     | -0.797182185 | 3.558769769  | 12.15048952 |
| SORCS1:CCDS31283.1    | -0.806694064 | 4.879896011  | 12.14898522 |
| LDB3:CCDS41544.1      | -1.061088113 | 2.201068725  | 12.14474822 |
| MBOAT4:CCDS47835.1    | -0.946407346 | 0.401641447  | 12.13903637 |
| MXRA7:CCDS45786.1     | 0.912693067  | 5.384063165  | 12.1371997  |
| POU3F3:CCDS33265.1    | -0.717385672 | 5.168479956  | 12.13406397 |
| TLR4:CCDS6818.1       | -0.974630457 | 1.234445018  | 12.13033621 |
| MMS19:CCDS7464.1      | 0.50851917   | 6.776764641  | 12.12933095 |
| ING1:CCDS9516.1       | -0.728130269 | 3.650773289  | 12.11852962 |
| EPRS:CCDS31027.1      | 0.642131986  | 7.109172203  | 12.11362728 |
| ENO3:CCDS54070.1      | -1.259683262 | 3.556234136  | 12.1078988  |
| TNFAIP8L3:CCDS32241.1 | -0.982573419 | 0.203081058  | 12.10622181 |
| KLHDC7B:CCDS14097.2   | -0.75987417  | 0.868072633  | 12.09997075 |
| CACNA1A:CCDS45999.1   | -0.944507065 | 4.503265215  | 12.09927735 |
| ODF1:CCDS6293.1       | -1.485547717 | -0.592442619 | 12.09746208 |
| S100A14:CCDS1046.1    | -1.122588313 | -0.646754027 | 12.09689868 |
| HBA1:CCDS10399.1      | -1.131124367 | -0.657692484 | 12.09675839 |
| KCNK7:CCDS41673.1     | -1.091419124 | 0.728674318  | 12.08359508 |
| PRKAR2A:CCDS2778.1    | 0.652108998  | 4.48218921   | 12.08330242 |
| NPY1R:CCDS34089.1     | -0.985208081 | 0.992994978  | 12.07707625 |
| TC2N:CCDS9897.1       | -0.925283559 | 0.78553666   | 12.07585551 |

## TAUvsControls

|                      |              |              |             |
|----------------------|--------------|--------------|-------------|
| UTS2R:CCDS11810.1    | -1.019324223 | -0.033834753 | 12.07357367 |
| LHFPL1:CCDS14562.1   | -0.983441487 | -0.244832059 | 12.07340741 |
| GIPC2:CCDS685.1      | -1.019246996 | -0.117827576 | 12.0681082  |
| CBR3:CCDS13642.1     | -1.323301053 | 0.977818981  | 12.06677226 |
| FANCG:CCDS6574.1     | 0.73859336   | 5.394267531  | 12.06014393 |
| ASAP3:CCDS235.1      | 0.807060353  | 6.135584208  | 12.05951509 |
| NR5A2:CCDS1400.1     | -0.973173254 | 0.516755449  | 12.04539166 |
| TRAF3IP2:CCDS55049.1 | -0.867173881 | 2.056898794  | 12.04063689 |
| FGF7:CCDS10131.1     | -1.553950366 | 0.571075891  | 12.03929738 |
| TAS2R3:CCDS5867.1    | -1.031276577 | -0.394463603 | 12.03790425 |
| SLC38A8:CCDS32495.1  | -1.132682379 | 0.928659228  | 12.03264624 |
| USP43:CCDS45610.1    | -0.654754854 | 2.519261137  | 12.01520904 |
| OR10G7:CCDS31705.1   | -1.42017359  | -0.158015945 | 12.0151227  |
| ZNF812:CCDS54215.1   | -0.910699762 | 0.437601059  | 12.01259902 |
| GPHA2:CCDS8086.1     | -1.446934366 | -0.777981116 | 12.01084921 |
| KANK4:CCDS620.1      | -1.04164803  | 3.025471138  | 12.00477811 |
| ACAD11:CCDS3074.1    | 0.561516055  | 3.978264667  | 12.00384554 |
| MCF2:CCDS48175.1     | -0.740175581 | 2.131227786  | 12.00051384 |
| OR9Q2:CCDS31544.1    | -1.464954358 | -0.192602225 | 11.99850221 |
| CCDC169:CCDS45027.1  | -0.965819131 | 0.173109254  | 11.99790562 |
| NOX4:CCDS44696.1     | -0.827989974 | 1.740032235  | 11.99384609 |
| SPINT2:CCDS12510.1   | -1.078209764 | 5.657098239  | 11.99361526 |
| RASGRP3:CCDS46256.1  | -1.188038623 | 1.953551816  | 11.98453296 |
| ABLIM2:CCDS47015.1   | -0.812933562 | 3.340441466  | 11.98074216 |
| NKX3-1:CCDS6042.1    | -1.430150661 | -0.457742064 | 11.98067767 |
| KAZN:CCDS152.2       | -0.688415586 | 4.948620446  | 11.97961842 |
| ANKRD34A:CCDS30829.1 | -0.924559017 | 1.761410912  | 11.97075899 |
| KLRD1:CCDS8622.1     | -1.452302703 | -0.370848224 | 11.96380062 |
| CDHR1:CCDS7372.1     | -1.042209278 | 4.550899561  | 11.95997566 |
| NFKBIZ:CCDS43123.1   | -0.713870852 | 1.792018939  | 11.95925878 |
| EVC2:CCDS3382.2      | -1.07176817  | 2.583109168  | 11.95363479 |
| ZNF462:CCDS35096.1   | 0.718340126  | 6.278283755  | 11.94762454 |
| SLC16A7:CCDS8961.1   | -0.911168775 | 0.606070787  | 11.94671689 |
| CDK5:CCDS55184.1     | -0.819745609 | 5.929925388  | 11.94332718 |
| NEDD9:CCDS4520.1     | -0.570049572 | 4.39632772   | 11.93288233 |
| RASGRP3:CCDS54346.1  | -1.185236336 | 1.951305136  | 11.93256612 |
| SMTNL2:CCDS45583.1   | -1.189091459 | 1.813789954  | 11.92476477 |
| SEL1L:CCDS9876.1     | 0.771995888  | 5.58896518   | 11.92463871 |
| ZNF662:CCDS46807.1   | -0.875922751 | 0.467165428  | 11.92048957 |
| PLCXD2:CCDS54619.1   | -0.687708247 | 1.888489307  | 11.91725905 |
| UGT1A6:CCDS2508.1    | -0.96865267  | 0.133041406  | 11.91204168 |
| LRTOMT:CCDS44667.1   | 0.687431689  | 2.172363264  | 11.91009089 |
| TPTE2:CCDS45014.1    | -0.839087838 | 1.28940004   | 11.90795941 |
| TCL1A:CCDS9941.1     | -1.545401464 | -0.746220843 | 11.90698554 |
| TUBA3E:CCDS2158.1    | -1.444654945 | 4.368028245  | 11.90548387 |
| CEL:CCDS43896.1      | -2.082648981 | 4.489018892  | 11.9054037  |
| GLIPR1:CCDS9011.1    | -1.214072916 | 1.914609342  | 11.89902126 |
| NPM1:CCDS43399.1     | 0.6725595    | 8.594599482  | 11.89157554 |
| CD300LG:CCDS54133.1  | -0.873423158 | 0.05173237   | 11.89130781 |
| KCNH5:CCDS45122.1    | -1.046730913 | 1.213004207  | 11.88817579 |
| FBNP1:CCDS48040.1    | 0.557235868  | 5.13417091   | 11.88227758 |

## TAUvsControls

|                      |              |              |             |
|----------------------|--------------|--------------|-------------|
| ISY1:CCDS56277.1     | 0.671099199  | 4.507432826  | 11.881796   |
| SFTPA1:CCDS44445.1   | -0.898526572 | -0.146547868 | 11.88171295 |
| ACOT6:CCDS32118.1    | -1.461589433 | -0.82811183  | 11.87869756 |
| SAMD15:CCDS32126.1   | -0.902295326 | 2.168405558  | 11.87673905 |
| SLC7A7:CCDS9574.1    | -1.392552854 | 2.969445105  | 11.87597309 |
| TGM2:CCDS13302.1     | -1.140860754 | 3.590033833  | 11.86966142 |
| NGEF:CCDS46544.1     | -0.883987497 | 4.109171809  | 11.86365682 |
| VGLL3:CCDS43110.1    | 1.343547069  | 2.576049291  | 11.85860519 |
| RSPH10B2:CCDS43552.1 | -1.044880584 | 1.813667611  | 11.8581571  |
| DUSP4:CCDS6072.1     | -0.951104762 | 4.766716405  | 11.85689268 |
| TSPYL5:CCDS34927.1   | -1.18399875  | 0.093656364  | 11.85555993 |
| IMP4:CCDS2160.1      | -0.857346984 | 6.345976906  | 11.84707567 |
| RERGL:CCDS8679.1     | -1.355969155 | -0.013346686 | 11.84117346 |
| FAM170B:CCDS53536.1  | -1.429451608 | -0.215763979 | 11.84050555 |
| CDHR1:CCDS53548.1    | -1.034031648 | 4.340804203  | 11.83738026 |
| ASAP3:CCDS44087.1    | 0.800709541  | 6.087103235  | 11.83603521 |
| NLRP9:CCDS12934.1    | -1.649570938 | 1.576554184  | 11.83339312 |
| GALR1:CCDS12012.1    | -1.123034122 | 0.081659526  | 11.83220207 |
| TYROBP:CCDS46058.1   | -1.179145255 | -0.466412018 | 11.83109954 |
| AMELX:CCDS14145.1    | -1.065136843 | 0.543178671  | 11.82526717 |
| ARNT:CCDS971.1       | 0.846148584  | 5.078260735  | 11.82510781 |
| TRIM8:CCDS31274.1    | 0.608949368  | 5.882646201  | 11.82268001 |
| NUPL2:CCDS5379.1     | -0.57024434  | 3.246334905  | 11.80786453 |
| DUSP1:CCDS4380.1     | -0.712227473 | 4.156477608  | 11.80635491 |
| OR9G4:CCDS31537.1    | -1.41213377  | -0.299103796 | 11.79684922 |
| KLHL30:CCDS46555.2   | -1.047706822 | 0.80008627   | 11.7948044  |
| MXRA7:CCDS32746.1    | 0.898858375  | 5.41892455   | 11.79337783 |
| RASGRP1:CCDS45222.1  | -0.737050652 | 2.993773768  | 11.79121031 |
| CRYGB:CCDS2380.1     | -2.116483324 | 0.188436143  | 11.79088959 |
| ZFR2:CCDS45921.1     | -1.03738669  | 2.926623006  | 11.78626604 |
| SNTN:CCDS33779.1     | -1.43651913  | -0.802481883 | 11.78421394 |
| TYROBP:CCDS12482.1   | -1.177406464 | -0.461267829 | 11.78407957 |
| CELF4:CCDS32818.1    | -0.884573888 | 4.704806702  | 11.77131503 |
| CNOT1:CCDS45501.1    | 0.669705848  | 5.96730048   | 11.76974705 |
| OR52A5:CCDS31373.1   | -1.405686009 | -0.683763768 | 11.76548843 |
| SPTLC3:CCDS13115.2   | -1.029684112 | 1.419754495  | 11.76470183 |
| ADCY8:CCDS6363.1     | -0.868729439 | 3.557331634  | 11.76171671 |
| EDN2:CCDS462.1       | -0.929872063 | -0.001351736 | 11.76053981 |
| HSBP1L1:CCDS45886.1  | -1.138432348 | -0.010822984 | 11.75780049 |
| ANO10:CCDS2710.2     | 0.628818433  | 4.16256066   | 11.75123918 |
| TEX14:CCDS32692.1    | -0.859868688 | 2.549115202  | 11.75076402 |
| GPR50:CCDS44012.1    | -1.191393986 | 1.62035532   | 11.74817929 |
| RGS13:CCDS1376.1     | -1.509898904 | -0.940734083 | 11.73517987 |
| MITF:CCDS54607.1     | -0.716300152 | 1.794375653  | 11.73389669 |
| HLA-DMB:CCDS4760.1   | -0.951175764 | 0.478840883  | 11.73371632 |
| ANP32B:CCDS6732.1    | 0.709333264  | 6.356418371  | 11.73307128 |
| C6orf195:CCDS43416.1 | -1.524329471 | -0.798423313 | 11.73211782 |
| MYH10:CCDS11144.1    | 0.648897734  | 8.214628623  | 11.73149384 |
| NPHP1:CCDS2086.1     | -0.677915774 | 2.29318314   | 11.73054872 |
| ZNF385B:CCDS46463.1  | -1.14829894  | 1.376615288  | 11.72975118 |
| LY6D:CCDS6390.1      | -1.410880971 | -0.625878547 | 11.728488   |

## TAUvsControls

|                     |              |              |             |
|---------------------|--------------|--------------|-------------|
| CDH15:CCDS10976.1   | -2.051106284 | 4.308143696  | 11.72821927 |
| RCSD1:CCDS1263.1    | -0.899246077 | 0.738015606  | 11.71896563 |
| ZEB1:CCDS53507.1    | 0.776206932  | 5.199534058  | 11.71199867 |
| GPR75:CCDS1849.1    | -0.838955261 | 0.554926294  | 11.71155645 |
| PPP3R2:CCDS6759.1   | -1.479940115 | -0.918553853 | 11.71032135 |
| SLC22A4:CCDS4153.1  | -0.652622194 | 1.975741236  | 11.70643198 |
| CLDN19:CCDS44125.1  | -0.873892677 | 0.019137931  | 11.70208147 |
| PDZD7:CCDS31269.1   | -0.941090122 | 2.429127294  | 11.69870564 |
| CAMK2A:CCDS43387.1  | -0.829206744 | 3.687576899  | 11.69660166 |
| OR4X1:CCDS31487.1   | -1.45521678  | -0.807794269 | 11.69540063 |
| ANKRD53:CCDS46321.1 | -0.765849317 | 1.008957966  | 11.6951148  |
| CENPF:CCDS31023.1   | 0.960040531  | 6.070329425  | 11.69061467 |
| CARD9:CCDS6997.1    | -0.901671563 | 1.252459089  | 11.68924526 |
| AGR3:CCDS5365.1     | -1.560549477 | -0.471649687 | 11.68901356 |
| CELF4:CCDS45857.1   | -0.884165945 | 4.701224807  | 11.68847205 |
| CELF4:CCDS45856.1   | -0.883490631 | 4.702885498  | 11.68420666 |
| ZNF385B:CCDS33339.1 | -1.162214659 | 1.430735441  | 11.68220872 |
| EGR2:CCDS44409.1    | -1.090739286 | 1.492613661  | 11.68196662 |
| ZEB1:CCDS44370.1    | 0.771773767  | 5.307688237  | 11.67556772 |
| TRAT1:CCDS33813.1   | -1.417688802 | -0.348731164 | 11.67411282 |
| FAM122B:CCDS55499.1 | 0.933854836  | 3.480622128  | 11.6738052  |
| PDC:CCDS1370.1      | -1.882850435 | 0.005813362  | 11.66960069 |
| NPHP1:CCDS46385.1   | -0.676680438 | 2.290687889  | 11.66118527 |
| JPH2:CCDS13325.1    | -1.430789691 | 1.210831188  | 11.66067928 |
| TPTE2:CCDS45013.1   | -0.845945959 | 0.812024444  | 11.65049547 |
| PVALB:CCDS13933.1   | -1.550220107 | 0.599449074  | 11.6497377  |
| C7orf63:CCDS55122.1 | -0.778904278 | 1.914360687  | 11.64645423 |
| FGF14:CCDS9501.1    | -0.81015455  | 1.879863154  | 11.64450808 |
| MYRIP:CCDS2689.1    | -0.744377302 | 2.463132417  | 11.64304219 |
| MYD88:CCDS54567.1   | -0.876707073 | 1.352006115  | 11.63250169 |
| THG1L:CCDS4341.1    | 0.712247668  | 2.450677248  | 11.63068165 |
| DNAJC22:CCDS8785.1  | -1.151310116 | 0.53921234   | 11.62912472 |
| SLCO5A1:CCDS55243.1 | -0.707936848 | 2.111287371  | 11.62563818 |
| LAIR2:CCDS12898.1   | -1.435960151 | -0.557619435 | 11.62150335 |
| CCDC115:CCDS2159.1  | -0.967262368 | 5.329004122  | 11.62106494 |
| NOX4:CCDS44695.1    | -0.793719983 | 1.722772449  | 11.61852632 |
| SEC14L4:CCDS54517.1 | -0.882242316 | 1.077953216  | 11.61771619 |
| ALDH1A2:CCDS45266.1 | -1.452106231 | 2.680307422  | 11.61680129 |
| LAMB3:CCDS1487.1    | -0.861734503 | 2.260558128  | 11.61561726 |
| PDLIM3:CCDS47172.1  | -1.101193243 | 5.15183106   | 11.61336898 |
| ZFYVE28:CCDS54712.1 | -0.809632736 | 1.131865191  | 11.61331146 |
| SIGLEC1:CCDS13060.1 | -0.674562813 | 2.250350463  | 11.61295872 |
| NPHP1:CCDS46386.1   | -0.695321598 | 2.25585514   | 11.61141131 |
| ARNT:CCDS970.1      | 0.830473256  | 5.117161442  | 11.60982271 |
| CCDC27:CCDS50.1     | -0.797638036 | 1.085698742  | 11.60901611 |
| OR7A10:CCDS32936.1  | -1.149304535 | -0.547902243 | 11.60865219 |
| FZD10:CCDS9267.1    | 1.239826969  | 3.623682734  | 11.60600053 |
| ANO4:CCDS31884.1    | -0.861370761 | 2.520303144  | 11.60323475 |
| PSENNEN:CCDS12474.1 | 0.845084769  | 4.754436612  | 11.60129276 |
| DPY19L2:CCDS31851.1 | -0.781021631 | 1.868828918  | 11.59720233 |
| TRIP12:CCDS33391.1  | 0.611213146  | 6.609894951  | 11.59638923 |

## TAUvsControls

|                      |              |              |             |
|----------------------|--------------|--------------|-------------|
| SLCO5A1:CCDS55242.1  | -0.643555524 | 2.356969805  | 11.58959359 |
| HGFAC:CCDS3369.1     | -0.718932291 | 1.456442754  | 11.58873406 |
| ZEB1:CCDS53505.1     | 0.767454996  | 5.307476407  | 11.58853911 |
| TRIB1:CCDS6357.1     | -0.612853003 | 3.027649058  | 11.58336168 |
| ZEB1:CCDS7169.1      | 0.767166206  | 5.306595928  | 11.58326852 |
| OR4C6:CCDS31506.1    | -1.400548542 | -0.420337976 | 11.58290455 |
| CD300LG:CCDS54132.1  | -0.817441642 | 0.237811692  | 11.57551874 |
| GATC:CCDS31911.1     | -0.847813092 | 2.504322239  | 11.57464622 |
| EPB41L5:CCDS54393.1  | 0.65400758   | 4.108417097  | 11.56095018 |
| HTATIP2:CCDS53613.1  | -1.198101308 | -0.551659207 | 11.548345   |
| TDGF1:CCDS54575.1    | -1.423415725 | -0.82213766  | 11.54449911 |
| PARD3B:CCDS42805.1   | 0.666575706  | 4.296502957  | 11.53940651 |
| FAM122B:CCDS14643.1  | 0.930573098  | 3.369055871  | 11.53936712 |
| CSE1L:CCDS13412.1    | 0.619483402  | 6.174702837  | 11.53505863 |
| CREB3L4:CCDS1056.1   | 0.601588778  | 3.005509762  | 11.53111927 |
| PAICS:CCDS47061.1    | 0.619833789  | 6.021290129  | 11.5303214  |
| KCNK2:CCDS41467.1    | -0.631713252 | 2.526802432  | 11.52743118 |
| HMHA1:CCDS32863.1    | 0.885809127  | 4.264288623  | 11.51866103 |
| PDGFB:CCDS33650.1    | -0.944460438 | 2.327347844  | 11.51145625 |
| FAM110D:CCDS41285.1  | -1.061903763 | -0.086109729 | 11.50103108 |
| HRASLS2:CCDS8046.1   | -1.095675846 | -0.579043215 | 11.50045609 |
| CRHR2:CCDS56478.1    | -0.70744257  | 1.340950923  | 11.49775758 |
| TGFBR1:CCDS47998.1   | 0.738535756  | 3.995930624  | 11.4950187  |
| TMEM164:CCDS14550.2  | -0.63204212  | 2.968494888  | 11.48726312 |
| FER1L6:CCDS43767.1   | -1.009450522 | 2.674701175  | 11.47988418 |
| ESRP1:CCDS47897.1    | -0.756092784 | 1.240493885  | 11.47747264 |
| KIRREL2:CCDS12480.1  | 0.863280093  | 4.546959272  | 11.47698026 |
| AIFM3:CCDS13786.1    | -0.632940201 | 2.098846375  | 11.47572108 |
| SIGLEC5:CCDS33088.1  | -0.745743326 | 0.669422482  | 11.47543191 |
| C11orf87:CCDS31672.1 | -1.162031891 | 1.462515375  | 11.47366983 |
| RYR3:CCDS45210.1     | -0.59936338  | 4.374030216  | 11.47125688 |
| CD200R1L:CCDS43131.1 | -1.41051647  | 0.018930317  | 11.46888687 |
| CNOT1:CCDS10799.1    | 0.63791894   | 6.880252261  | 11.46751801 |
| FMNL1:CCDS11497.1    | -0.820804081 | 3.581121834  | 11.46700097 |
| ZEB1:CCDS53506.1     | 0.765114506  | 5.237245362  | 11.4632606  |
| FAM122B:CCDS55497.1  | 0.926787345  | 3.357225639  | 11.46072805 |
| GPR4:CCDS12669.1     | -0.855154664 | -0.207967677 | 11.46024053 |
| KCTD6:CCDS2891.1     | -0.632675372 | 2.557516725  | 11.46003582 |
| MAPK6:CCDS10147.1    | 0.620472029  | 4.721472663  | 11.45937553 |
| HAS3:CCDS10871.1     | -1.014809874 | 2.514961722  | 11.4590521  |
| HSD17B8:CCDS4769.1   | 0.685570773  | 3.989753638  | 11.4589152  |
| CDH26:CCDS13485.1    | -0.861956051 | 1.814510458  | 11.45413914 |
| CEBPA:CCDS54243.1    | 1.3199727    | 3.842268829  | 11.43865403 |
| KIFC3:CCDS45493.1    | -0.615154034 | 5.595740497  | 11.43803781 |
| C10orf11:CCDS7351.1  | -0.871199383 | 0.245040142  | 11.43467628 |
| BTLA:CCDS33819.1     | -0.911065666 | 0.029261579  | 11.43219899 |
| SPINT2:CCDS54261.1   | -1.050793762 | 5.356401719  | 11.42853135 |
| NLRP12:CCDS12864.1   | -0.702221868 | 1.738820699  | 11.4256854  |
| C16orf92:CCDS42146.1 | -1.164455462 | -0.654610915 | 11.42494322 |
| TMEM38A:CCDS12349.1  | -0.830749632 | 2.354632601  | 11.42395016 |
| PPP1R13B:CCDS41997.1 | -0.587298667 | 4.517833686  | 11.42247049 |

## TAUvsControls

|                      |              |              |             |
|----------------------|--------------|--------------|-------------|
| CDK5:CCDS47748.1     | -0.81227557  | 6.039574803  | 11.41538131 |
| SCML4:CCDS5060.2     | -0.918298001 | 1.124878639  | 11.41244515 |
| NPPA:CCDS139.1       | -1.289327579 | 1.09401699   | 11.41030655 |
| PHKG1:CCDS5525.1     | -0.765992603 | 1.113317771  | 11.40608832 |
| CRYGD:CCDS2378.1     | -1.693366487 | 1.749811425  | 11.40180888 |
| CPNE8:CCDS8733.1     | -1.036717551 | 2.466317635  | 11.40034534 |
| MCC:CCDS43351.1      | 0.71880648   | 4.309779765  | 11.40028546 |
| ADO:CCDS7266.2       | -0.66140407  | 2.893029558  | 11.39667188 |
| MYCT1:CCDS5239.1     | -1.218187913 | -0.558539902 | 11.39407072 |
| CARD8:CCDS54289.1    | 0.672206837  | 3.103362547  | 11.39393011 |
| HAGH:CCDS10447.2     | -0.553697353 | 6.18296355   | 11.38730085 |
| HAGH:CCDS32366.1     | -0.557423284 | 6.165421906  | 11.38198627 |
| DUSP4:CCDS6073.1     | -0.921737867 | 4.536231301  | 11.38096613 |
| IRF6:CCDS1492.1      | -0.940156001 | 0.785679576  | 11.38076586 |
| KIFC3:CCDS10789.2    | -0.614740475 | 5.60510384   | 11.38006555 |
| PLAC9:CCDS31232.1    | 1.558191332  | 3.050091831  | 11.37895746 |
| CDKN2C:CCDS555.1     | -0.743996615 | 2.049457033  | 11.37748864 |
| NAT1:CCDS6007.1      | -0.971484665 | -0.012169981 | 11.36709413 |
| ESRP1:CCDS47895.1    | -0.741864883 | 1.361361333  | 11.36469058 |
| GABBR2:CCDS6736.1    | -0.69982843  | 5.140565676  | 11.36238609 |
| NBPF16:CCDS41384.1   | 1.979664587  | 4.165228513  | 11.36203246 |
| CARD8:CCDS12712.2    | 0.66905083   | 2.976496719  | 11.3602281  |
| EID2:CCDS12540.2     | -0.678724873 | 3.000392595  | 11.35962506 |
| ERBB3:CCDS44918.1    | -1.420816566 | -0.044040001 | 11.35730012 |
| SPACA7:CCDS9524.1    | -1.370613729 | -0.04096493  | 11.35140269 |
| ADARB2:CCDS7058.1    | -0.732696058 | 2.366464246  | 11.34450675 |
| HYOU1:CCDS8408.1     | 0.544598269  | 8.308129982  | 11.34177519 |
| CASS4:CCDS33492.1    | -1.054113071 | 1.377481843  | 11.33947218 |
| PROK2:CCDS46868.1    | -1.373706763 | -0.666024429 | 11.33745501 |
| SHOX:CCDS14106.1     | -1.075528978 | 1.582643609  | 11.33543004 |
| SLCO5A1:CCDS6205.1   | -0.635415477 | 2.471759978  | 11.32558834 |
| ESRP1:CCDS47898.1    | -0.754245826 | 1.224500746  | 11.31377054 |
| SOX15:CCDS32549.1    | -1.050461619 | 0.760347609  | 11.31251136 |
| POTEF:CCDS46409.1    | -1.353851408 | 6.034935546  | 11.312428   |
| AIFM3:CCDS54503.1    | -0.638569419 | 2.027669179  | 11.30834274 |
| RASGRP1:CCDS45221.1  | -0.728174493 | 2.906001424  | 11.30759656 |
| KCNJ5:CCDS8479.1     | -0.913732701 | 1.268018704  | 11.30083403 |
| BEX5:CCDS35350.1     | -1.055338081 | 1.180330694  | 11.29382982 |
| DLEU7:CCDS53869.1    | -1.378348332 | -0.046307006 | 11.29108574 |
| RHBDD1:CCDS2464.1    | 0.632356654  | 2.345141772  | 11.2908585  |
| ITSN1:CCDS33546.1    | 0.685780938  | 5.765966693  | 11.28941358 |
| HIST2H3D:CCDS41388.1 | -1.306539568 | -0.252376407 | 11.2866798  |
| KIRREL2:CCDS12479.1  | 0.848543631  | 4.703812059  | 11.27984982 |
| NPTX1:CCDS32762.1    | -0.659171793 | 2.774468581  | 11.27754813 |
| TSSK2:CCDS13755.1    | -0.702751239 | 1.401475398  | 11.27568948 |
| HEPACAM2:CCDS5629.1  | -1.000668396 | 0.567397338  | 11.27463419 |
| SLC18A3:CCDS7231.1   | -0.949793519 | 1.981478995  | 11.27093354 |
| NPL:CCDS1350.1       | -0.711076365 | 1.289846831  | 11.26914633 |
| CD9:CCDS8540.1       | -0.984309885 | 4.597693749  | 11.26893026 |
| C1orf185:CCDS44142.1 | -1.437114931 | -0.677806971 | 11.25834193 |
| SPINK9:CCDS34269.1   | -1.456533277 | -0.800200926 | 11.25352274 |



## TAUvsControls

|                      |              |              |             |
|----------------------|--------------|--------------|-------------|
| ZFYVE28:CCDS54710.1  | -0.839528636 | 0.452562405  | 11.25090953 |
| AIFM3:CCDS33605.1    | -0.637236522 | 2.020855669  | 11.25036838 |
| CD8A:CCDS1993.1      | -0.971252384 | 0.029575204  | 11.24958449 |
| PTPN18:CCDS46410.1   | -1.330577618 | 5.339024358  | 11.24879736 |
| ZCCHC12:CCDS14574.1  | -0.874412864 | 4.875402352  | 11.2446152  |
| TMEM102:CCDS11104.1  | -0.657482638 | 1.338513982  | 11.23749114 |
| PTPN18:CCDS2161.1    | -1.337756954 | 5.796582984  | 11.23144998 |
| PDLIM3:CCDS3844.1    | -1.056051509 | 5.058766064  | 11.22519708 |
| CD300LG:CCDS54131.1  | -0.791200311 | 0.426901221  | 11.22460146 |
| GLRX2:CCDS1381.1     | -0.686119612 | 0.908388036  | 11.22335443 |
| TMEM44:CCDS54699.1   | -0.600811437 | 3.393157138  | 11.22069595 |
| CELF3:CCDS53367.1    | -0.769028123 | 6.566065377  | 11.21804301 |
| NPL:CCDS55667.1      | -0.757860808 | 1.045969825  | 11.21657748 |
| THBD:CCDS13148.1     | -1.215295936 | 1.136578649  | 11.20928817 |
| NGEF:CCDS2500.1      | -0.872292503 | 4.094127179  | 11.20834794 |
| ADIPOQ:CCDS3284.1    | -1.418487999 | -0.380473083 | 11.20762542 |
| ASTN1:CCDS44280.1    | -0.809766227 | 5.836185207  | 11.20700135 |
| FBXO41:CCDS46337.2   | -0.851049399 | 4.140299543  | 11.20011108 |
| IL22RA2:CCDS5184.1   | -1.529307967 | -1.171669422 | 11.19820416 |
| NCKAP1L:CCDS53799.1  | -1.130582941 | 1.999115301  | 11.19563342 |
| AFAP1L1:CCDS34274.1  | -1.476371503 | 1.917654213  | 11.19345486 |
| KIAA1456:CCDS47808.1 | -0.859655286 | 1.451300955  | 11.19175844 |
| KCTD14:CCDS8255.2    | -0.879533541 | 0.199873553  | 11.18965892 |
| GJB1:CCDS14408.1     | -1.016386944 | -0.331198959 | 11.18767176 |
| KCNK17:CCDS4842.1    | -1.254441499 | 0.397007208  | 11.18708594 |
| PARD3B:CCDS42804.1   | 0.650893665  | 4.295505506  | 11.18489678 |
| C5orf51:CCDS34151.1  | 0.713858955  | 2.377225676  | 11.18413926 |
| C2orf61:CCDS1831.1   | -1.373695619 | -0.155171362 | 11.18330353 |
| KCNN4:CCDS12630.1    | -0.732634288 | 0.74547624   | 11.17495115 |
| NKX2-1:CCDS9659.1    | -1.845341917 | 0.34894346   | 11.1698457  |
| HSPA6:CCDS1231.1     | -1.325704461 | 2.280507273  | 11.16692608 |
| GNRH2:CCDS13042.1    | -1.134613459 | -0.58054555  | 11.16350814 |
| GPR126:CCDS47490.1   | -1.289563228 | 3.028389491  | 11.16090146 |
| FSCN3:CCDS34746.1    | -0.872869032 | 0.61791531   | 11.15888901 |
| HNRNPU:CCDS31081.1   | 0.623239133  | 7.879387746  | 11.15714394 |
| GPR126:CCDS47491.1   | -1.26538462  | 2.979699014  | 11.15699452 |
| TYROBP:CCDS54255.1   | -1.18509061  | -0.705711197 | 11.15433844 |
| C19orf12:CCDS42542.1 | -0.69424884  | 2.349016482  | 11.1528882  |
| ZNF781:CCDS12507.1   | -0.961709134 | -0.285454466 | 11.14964681 |
| SLC22A7:CCDS4892.1   | -0.863945159 | 1.192762872  | 11.14953821 |
| THPO:CCDS54693.1     | -0.833062466 | 0.726595608  | 11.14914469 |
| NTRK3:CCDS10340.1    | -0.703793383 | 4.185769852  | 11.14763612 |
| HNRNPU:CCDS41479.1   | 0.621961498  | 7.887253104  | 11.14613127 |
| ATXN7L3B:CCDS53815.1 | -0.653606315 | 5.245220824  | 11.13978025 |
| GALNT12:CCDS6737.1   | -0.728214622 | 2.205428438  | 11.13301738 |
| FBXO43:CCDS47904.1   | -0.781368744 | 0.514558653  | 11.13015536 |
| NCKAP1L:CCDS31813.1  | -1.124164896 | 2.055437219  | 11.11764952 |
| ARHGAP9:CCDS8941.2   | -0.659558038 | 2.291483035  | 11.11722212 |
| KAZN:CCDS41267.1     | -0.644042289 | 4.489179039  | 11.112882   |
| RAD54L2:CCDS33765.2  | 0.676580138  | 5.656506631  | 11.10499464 |
| CCBL2:CCDS30767.1    | 0.560721179  | 3.766696602  | 11.09561356 |

## TAUvsControls

|                      |              |              |             |
|----------------------|--------------|--------------|-------------|
| GNRH2:CCDS13041.1    | -1.129707952 | -0.563970211 | 11.09227749 |
| CFC1:CCDS2162.1      | -0.922900908 | 1.260162606  | 11.09148112 |
| CDRT15:CCDS32569.1   | -1.415744961 | -0.657562491 | 11.09067242 |
| PDE1C:CCDS55100.1    | -0.653027432 | 2.590437908  | 11.08668814 |
| JPH2:CCDS13326.1     | -1.778828164 | -0.473736957 | 11.08556646 |
| RENBP:CCDS14738.2    | 1.291073649  | 4.29655372   | 11.084654   |
| KCNC3:CCDS12793.1    | -0.707603042 | 2.811073851  | 11.07863699 |
| ARHGAP9:CCDS44928.1  | -0.670195112 | 2.005216316  | 11.07415468 |
| HEPACAM2:CCDS43616.1 | -1.009631066 | 0.65148657   | 11.06990404 |
| ZG16:CCDS54000.1     | -1.415077402 | -0.790279731 | 11.06974061 |
| ZC3H13:CCDS9400.1    | 0.670339473  | 6.103825219  | 11.06383081 |
| HTR3B:CCDS8364.1     | -1.169455154 | 0.522855871  | 11.0609677  |
| FAM163A:CCDS1333.1   | -1.23332917  | 0.490772534  | 11.05890373 |
| TMEM44:CCDS3308.2    | -0.614274552 | 3.367496295  | 11.05846398 |
| CARD14:CCDS11768.1   | -0.613784507 | 2.170538387  | 11.05549452 |
| PARD3B:CCDS42806.1   | 0.651119318  | 4.301204669  | 11.04811222 |
| ANO10:CCDS56248.1    | 0.612892619  | 4.076727847  | 11.03961297 |
| POLL:CCDS7513.1      | 0.551687781  | 4.448239545  | 11.03447318 |
| C3orf55:CCDS46944.1  | -1.415146526 | -0.23455385  | 11.01466405 |
| C1orf52:CCDS703.1    | -0.687718032 | 3.154456516  | 11.00257501 |
| DOK5:CCDS13446.1     | -0.674890102 | 4.755819197  | 11.00067664 |
| TMPRSS15:CCDS13571.1 | -0.66602456  | 1.877191915  | 10.99553948 |
| SSX2B:CCDS48129.1    | -1.416740034 | -0.217641865 | 10.99464123 |
| MR1:CCDS1342.1       | -0.900267275 | 0.808039226  | 10.9839884  |
| KAZN:CCDS41268.1     | -0.630519999 | 4.267379329  | 10.97348577 |
| ARNTL:CCDS44543.1    | -0.691009423 | 3.140203351  | 10.96967962 |
| CELF3:CCDS1002.1     | -0.75689605  | 6.603051523  | 10.96937851 |
| MCC:CCDS4111.1       | 0.69679764   | 4.242342298  | 10.96370593 |
| DNAAF2:CCDS45100.1   | -0.563788254 | 2.578847163  | 10.95822524 |
| MFI2:CCDS3325.1      | -0.788945402 | 2.418740715  | 10.95352139 |
| SPTB:CCDS32100.1     | -0.966277496 | 3.811258195  | 10.95192569 |
| NTS:CCDS9029.1       | -1.171540229 | 1.600666458  | 10.94608579 |
| CELF4:CCDS45858.1    | -0.870947545 | 4.590702881  | 10.94393271 |
| WEE2:CCDS43660.1     | -0.676377114 | 1.639961496  | 10.94344084 |
| GAS2L2:CCDS11298.1   | -0.894231176 | 1.382248472  | 10.94343708 |
| ZNF556:CCDS12097.1   | -0.846898711 | 0.259535567  | 10.94267022 |
| TAF1L:CCDS35003.1    | -0.650739413 | 2.457358703  | 10.94139719 |
| KCTD19:CCDS42179.1   | -0.915758709 | 1.737967415  | 10.93535706 |
| DOK4:CCDS10783.1     | -0.682703794 | 5.169049601  | 10.93106172 |
| CD7:CCDS11807.1      | -0.788107389 | 0.003421116  | 10.92999936 |
| ZNF385B:CCDS46464.1  | -1.127705889 | 1.177770862  | 10.92830229 |
| SPATA12:CCDS2879.1   | -1.061731127 | -0.648205018 | 10.92314767 |
| TMEM44:CCDS33921.1   | -0.603673274 | 3.293661706  | 10.91753562 |
| RPAP1:CCDS10079.1    | 0.5485575    | 5.864558589  | 10.91508211 |
| CLUL1:CCDS42405.1    | -0.711781857 | 1.701535536  | 10.91280927 |
| DMRT3:CCDS6443.1     | -1.052724062 | 1.279641697  | 10.90678785 |
| TBC1D28:CCDS42273.1  | -1.149431579 | -0.278807018 | 10.90664382 |
| THAP1:CCDS6137.1     | -0.720884816 | 0.472015455  | 10.90489682 |
| RHOB:CCDS1699.1      | -1.021779268 | 5.183495416  | 10.90224762 |
| NPFFR1:CCDS53539.1   | -0.916877551 | 0.204953828  | 10.89619795 |
| ESRP2:CCDS10863.1    | -0.647002876 | 1.40169548   | 10.89365399 |

## TAUvsControls

|                      |              |              |             |
|----------------------|--------------|--------------|-------------|
| MEOX2:CCDS34605.1    | -1.532284887 | 1.972708675  | 10.88890097 |
| POLB:CCDS6129.1      | -0.703398882 | 4.94885147   | 10.88779659 |
| YEATS4:CCDS8990.1    | -0.660260473 | 3.11538503   | 10.88390756 |
| SGPL1:CCDS31216.1    | 0.634303866  | 4.711077042  | 10.88373866 |
| C19orf59:CCDS12183.1 | -1.185053113 | -0.26273773  | 10.87902929 |
| RSPO4:CCDS42845.1    | -1.361523142 | -0.058116757 | 10.87746654 |
| MAMLD1:CCDS55525.1   | -0.582927231 | 3.504209298  | 10.87499124 |
| LRTOMT:CCDS8208.1    | 0.622938758  | 2.483463943  | 10.87450337 |
| ADAMTSL4:CCDS955.1   | 0.744339869  | 3.609206305  | 10.87287823 |
| CECR1:CCDS13743.1    | 1.143494574  | 3.416372856  | 10.87256096 |
| ASCC3:CCDS5046.1     | 0.705939987  | 5.056636618  | 10.86806558 |
| THPO:CCDS3265.1      | -0.826062936 | 0.757340916  | 10.8679598  |
| LTA4H:CCDS9059.1     | 0.520527492  | 6.169201678  | 10.86683331 |
| RAB36:CCDS13805.1    | 0.654334206  | 3.958812757  | 10.85104322 |
| DISC1:CCDS31055.1    | -0.685665364 | 2.347605608  | 10.84462767 |
| KIAA0368:CCDS48006.1 | 0.501932763  | 6.605387262  | 10.84448001 |
| ZBTB7A:CCDS12119.1   | -0.594329074 | 3.010068172  | 10.84112602 |
| NEDD9:CCDS47373.1    | -0.554954478 | 4.372538469  | 10.83593324 |
| IGSF22:CCDS41625.2   | -0.73447181  | 2.37933169   | 10.83580619 |
| C1QTNF1:CCDS11762.1  | -1.264897908 | 1.062926578  | 10.83156552 |
| ZNF716:CCDS55112.1   | -0.861513521 | 0.267086338  | 10.83101771 |
| GPR20:CCDS34949.1    | -0.851141815 | -0.019438906 | 10.8304668  |
| ADRA2C:CCDS47004.1   | -1.033172791 | 1.274080398  | 10.82799245 |
| RGS18:CCDS1374.1     | -1.374349286 | -0.39852234  | 10.82777254 |
| COL9A2:CCDS450.1     | -1.045038669 | 3.63735146   | 10.82417627 |
| OR8B4:CCDS31710.1    | -1.379815221 | -0.698487719 | 10.82299922 |
| SLC45A4:CCDS34948.1  | -0.566738843 | 3.004532103  | 10.82247398 |
| GRK5:CCDS7612.1      | -0.631041928 | 4.469345365  | 10.82019352 |
| KCNJ9:CCDS1194.1     | -0.822032528 | 2.367168797  | 10.81530315 |
| CIT:CCDS55891.1      | 0.716543263  | 5.208898332  | 10.81440203 |
| ACTR3C:CCDS47744.1   | -0.639487237 | 1.547816921  | 10.81312708 |
| NSL1:CCDS53474.1     | -0.582127686 | 3.128526149  | 10.81289681 |
| FAM122B:CCDS55498.1  | 0.931820428  | 3.392368683  | 10.81264972 |
| KRT19:CCDS11399.1    | -1.101253466 | 3.73995873   | 10.80420573 |
| ABLIM2:CCDS54719.1   | -0.770567178 | 3.325774374  | 10.78775948 |
| ANO10:CCDS56250.1    | 0.600018211  | 4.023845167  | 10.78748062 |
| MPEG1:CCDS41650.1    | -2.083202066 | 1.030829505  | 10.78735925 |
| ARNTL:CCDS31430.1    | -0.689705006 | 3.23178082   | 10.78033264 |
| AMOT:CCDS48154.1     | 0.827664813  | 4.729623947  | 10.78003982 |
| EIF4B:CCDS41788.1    | 0.59679333   | 8.777939385  | 10.77818758 |
| EVC2:CCDS54718.1     | -1.023304566 | 2.507141002  | 10.77812031 |
| PPP2R2C:CCDS56305.1  | -0.953860548 | 4.100166046  | 10.77549733 |
| UBE4A:CCDS55790.1    | 0.592602374  | 5.197835777  | 10.77445315 |
| LMTK3:CCDS46136.1    | -0.691992549 | 5.971006653  | 10.77206366 |
| SP110:CCDS2475.1     | -1.090701165 | 3.490407073  | 10.77006612 |
| CPA6:CCDS6200.1      | -0.808866307 | 0.851376092  | 10.76879588 |
| NTRK3:CCDS32322.1    | -0.700098071 | 4.201362159  | 10.76863887 |
| CDV3:CCDS46918.1     | 0.629150073  | 4.174123841  | 10.76721931 |
| CLDN19:CCDS471.1     | -0.832360333 | 0.171598852  | 10.75911292 |
| PLEKHO1:CCDS945.1    | -0.676555245 | 6.134936763  | 10.75271527 |
| FBRSL1:CCDS45010.1   | -0.628891455 | 5.704652127  | 10.74990491 |

## TAUvsControls

|                     |              |              |             |
|---------------------|--------------|--------------|-------------|
| XPO1:CCDS33205.1    | 0.593422576  | 6.058068834  | 10.74906256 |
| CYP11A1:CCDS45303.1 | -0.835619542 | 0.37119446   | 10.74060873 |
| SEPT12:CCDS53987.1  | -0.77336589  | 0.307561697  | 10.73501813 |
| MUCL1:CCDS8885.1    | -1.400944789 | -0.731807895 | 10.73285617 |
| MREG:CCDS46513.1    | -0.70607409  | 1.518369086  | 10.7269129  |
| SMARCA5:CCDS3761.1  | 0.639239862  | 6.703635112  | 10.72510529 |
| EMX2:CCDS7601.1     | -1.085675331 | 2.910241142  | 10.71977305 |
| WEE1:CCDS44536.1    | 0.554822948  | 4.129661984  | 10.71611617 |
| GMPS:CCDS46941.1    | 0.55968492   | 5.445321132  | 10.71333243 |
| OLFM4:CCDS9440.1    | -0.855673581 | 0.36858903   | 10.71147821 |
| ESRP1:CCDS47896.1   | -0.721416896 | 1.276992314  | 10.70956083 |
| GPX7:CCDS569.1      | -0.936577289 | 2.489778788  | 10.70917853 |
| TMEM101:CCDS11474.1 | 0.63608067   | 4.142697111  | 10.70882431 |
| TEX12:CCDS31679.1   | -1.423847413 | -0.601637681 | 10.70779505 |
| UBE4A:CCDS8396.1    | 0.590188058  | 5.198838688  | 10.70436574 |
| OR5M9:CCDS31531.1   | -1.408258016 | -0.590277465 | 10.69614859 |
| CHRNA1:CCDS2261.1   | -1.571185868 | 2.116016316  | 10.69487578 |
| CBLC:CCDS12643.1    | -1.523707416 | 1.287246138  | 10.69233758 |
| PKIA:CCDS6222.1     | -0.578899484 | 4.332463606  | 10.68819365 |
| MEOX1:CCDS42343.1   | -1.187786072 | 0.351904429  | 10.68664767 |
| PDE9A:CCDS13690.1   | -0.569162272 | 5.05400876   | 10.67445446 |
| PAX2:CCDS41561.1    | -1.27678102  | 3.392000606  | 10.67284878 |
| KCNIP2:CCDS41562.1  | -0.766721755 | 2.800642913  | 10.67176922 |
| SP110:CCDS2474.1    | -1.085142571 | 3.47819216   | 10.66916586 |
| P2RY2:CCDS8219.1    | -1.086746304 | -0.063704186 | 10.66758946 |
| TXNDC8:CCDS35104.1  | -1.400705264 | -0.646535567 | 10.66563381 |
| PDE9A:CCDS33567.1   | -0.579671013 | 4.972351922  | 10.66058096 |
| SHISA2:CCDS31951.1  | -1.135802785 | 2.728874428  | 10.65658247 |
| ENTPD8:CCDS43913.1  | -0.735199076 | 0.80400287   | 10.64362074 |
| NDNL2:CCDS10023.1   | -0.694451013 | 4.409756874  | 10.63650486 |
| AHRR:CCDS43297.1    | -0.56697554  | 3.989737783  | 10.63626903 |
| CNDP1:CCDS12007.1   | -0.902133662 | 0.999479246  | 10.63394395 |
| OTUD1:CCDS44366.1   | -0.599748995 | 1.928236059  | 10.63135097 |
| KAZN:CCDS30604.1    | -0.632706749 | 4.399801125  | 10.62364184 |
| EGR3:CCDS56528.1    | -0.89328774  | 0.852436727  | 10.61865726 |
| SCN5A:CCDS54570.1   | -1.138637072 | 3.656172002  | 10.61444222 |
| SH2D2A:CCDS1159.1   | -0.84971231  | 0.832366997  | 10.60951088 |
| GPR64:CCDS55379.1   | -0.85210925  | 2.936521045  | 10.60430472 |
| GPR126:CCDS47489.1  | -1.27065377  | 3.018502708  | 10.6010732  |
| TSHZ1:CCDS12009.1   | -0.668679815 | 4.897999989  | 10.59980693 |
| E2F8:CCDS7849.1     | -0.710925466 | 2.031740191  | 10.59214291 |
| KLRC1:CCDS8626.1    | -1.353865377 | -0.464555474 | 10.58873894 |
| CCDC116:CCDS13791.1 | -0.776497136 | 0.727148628  | 10.58633118 |
| RTN1:CCDS9740.1     | -0.809322777 | 7.04914556   | 10.58332699 |
| GPR83:CCDS8297.1    | -0.93687465  | 1.010782234  | 10.58055524 |
| TIFA:CCDS34051.1    | -0.933442332 | 0.699373721  | 10.57904102 |
| KCNK2:CCDS31024.1   | -0.60949771  | 2.496779869  | 10.5782636  |
| SLC7A3:CCDS14404.1  | 0.786002237  | 3.890823947  | 10.57529935 |
| CAMKK2:CCDS9218.1   | -0.602222846 | 4.6325391    | 10.57159867 |
| CCDC148:CCDS33304.1 | -0.724705827 | 1.504339407  | 10.5699328  |
| PANK4:CCDS42.1      | -0.594484153 | 5.871410116  | 10.56921273 |

## TAUvsControls

|                        |              |              |             |
|------------------------|--------------|--------------|-------------|
| CD82:CCDS7909.1        | -0.728645118 | 4.364817553  | 10.56825786 |
| SELO:CCDS43034.1       | -0.523404943 | 4.203576025  | 10.56723165 |
| KCNIP2:CCDS7525.1      | -0.771203107 | 2.743816026  | 10.56505754 |
| CD200R1L:CCDS56267.1   | -1.397786544 | -0.213700838 | 10.55913922 |
| AP4S1:CCDS9642.1       | -0.845323191 | 0.874689442  | 10.55869282 |
| GPR126:CCDS55064.1     | -1.245752518 | 2.969487487  | 10.54776969 |
| SYNRG:CCDS54113.1      | 0.510156329  | 5.146729259  | 10.54518856 |
| MAST1:CCDS32921.1      | -0.703094104 | 6.936637751  | 10.54148334 |
| SPINT1:CCDS45231.1     | -1.152434982 | 2.236179706  | 10.53564623 |
| CCDC42B:CCDS44983.1    | -0.856220636 | 0.229593638  | 10.53413825 |
| LCTL:CCDS10220.1       | -0.618774267 | 1.982878379  | 10.53369261 |
| PLL:CCDS10777.1        | -0.937526502 | -0.262013873 | 10.53130221 |
| TMEM165:CCDS3499.1     | -0.735769619 | 3.579289304  | 10.52960443 |
| PLG:CCDS55074.1        | -1.34324867  | -0.370960389 | 10.52843746 |
| CABP5:CCDS12709.1      | -1.648127819 | 0.344835499  | 10.52581991 |
| CCBL2:CCDS30766.1      | 0.533445246  | 3.912601772  | 10.52218415 |
| FGF19:CCDS8193.1       | -1.300346278 | 2.027011833  | 10.5207969  |
| ADAMTS17:CCDS10383.1   | -0.97410851  | 2.369673019  | 10.50935322 |
| MMP26:CCDS7752.1       | -0.891854279 | -0.339500773 | 10.50813103 |
| POU2F1:CCDS55655.1     | 0.7467848    | 3.648490129  | 10.49578608 |
| ASTN1:CCDS1319.1       | -0.787846105 | 5.911274357  | 10.49244609 |
| ACSM3:CCDS45435.1      | -0.967995685 | 0.924717     | 10.4819765  |
| CALCR:CCDS55125.1      | -1.429204975 | 1.127169292  | 10.47201205 |
| MYOM3:CCDS41281.1      | -1.498644176 | 3.00935118   | 10.46572026 |
| CIT:CCDS9192.1         | 0.706722631  | 5.173646236  | 10.46292702 |
| ITSN1:CCDS33545.1      | 0.615652415  | 5.862324364  | 10.46100536 |
| MED30:CCDS6323.1       | -0.707954243 | 2.737210452  | 10.44568183 |
| SH2D2A:CCDS53381.1     | -0.841541591 | 0.849133297  | 10.43852466 |
| PAX2:CCDS7499.1        | -1.249600284 | 3.33439585   | 10.43639987 |
| KRT12:CCDS11378.1      | -0.814979145 | 0.462033904  | 10.43416884 |
| CDKL4:CCDS33184.1      | -1.425182391 | 1.471984123  | 10.43172245 |
| ISY1-RAB43:CCDS56276.1 | 0.607877224  | 4.587662802  | 10.43094788 |
| MYL9:CCDS13276.1       | -1.519807339 | 4.730186576  | 10.419436   |
| TNNI1:CCDS1411.1       | -1.760454511 | 5.080926144  | 10.41903168 |
| BCL11B:CCDS9949.1      | -1.200350569 | 3.122474167  | 10.4187211  |
| BID:CCDS13747.1        | -0.662592953 | 3.563728513  | 10.41670538 |
| SPINT1:CCDS10067.1     | -1.15749853  | 2.257698488  | 10.41378782 |
| LRRC32:CCDS8245.1      | -1.084322972 | 2.336936179  | 10.41257294 |
| NPL:CCDS55666.1        | -0.708199317 | 1.052669864  | 10.40927962 |
| LY9:CCDS30917.1        | -1.131923352 | -0.440852401 | 10.40711834 |
| MAGEB10:CCDS35221.1    | -1.292132802 | -0.342610165 | 10.40425798 |
| APOOL:CCDS48138.1      | 0.615456306  | 2.534541927  | 10.39581965 |
| DIRAS3:CCDS641.1       | -1.079850094 | 1.21265576   | 10.39343342 |
| FAM19A5:CCDS46728.1    | -0.623028776 | 3.279152097  | 10.38642279 |
| ANXA3:CCDS3584.1       | -1.219286828 | 2.472029821  | 10.38226749 |
| POU2F1:CCDS1259.2      | 0.736986855  | 3.740163082  | 10.38087893 |
| SYT2:CCDS1427.1        | 0.749550247  | 2.552462277  | 10.37789347 |
| EPS15:CCDS557.1        | 0.715141784  | 5.437177845  | 10.37186699 |
| MIB1:CCDS11871.1       | 0.698177606  | 5.210397156  | 10.37153325 |
| INSL6:CCDS6458.1       | -1.434070711 | -0.741972952 | 10.37021242 |
| CLDN10:CCDS9475.1      | -0.784503331 | -0.103918408 | 10.36460867 |

## TAUvsControls

|                      |              |              |             |
|----------------------|--------------|--------------|-------------|
| OR4K1:CCDS32025.1    | -1.356128633 | -0.59340371  | 10.36225995 |
| SPPL2C:CCDS32673.1   | -0.715331361 | 0.686450399  | 10.35606633 |
| PCSK2:CCDS13125.1    | -0.857406303 | 4.878610708  | 10.3555307  |
| ING1:CCDS9517.1      | -0.682491168 | 3.652948109  | 10.35019387 |
| KRT17:CCDS11402.1    | -0.894078166 | 1.61635755   | 10.34973181 |
| PPP2R2C:CCDS3388.1   | -0.937965216 | 4.160972347  | 10.34864512 |
| ZNF503:CCDS7350.1    | -0.803712127 | 4.478747399  | 10.34577705 |
| MAPK10:CCDS43247.1   | 0.627421814  | 5.219561632  | 10.33758363 |
| SLCO1A2:CCDS8686.1   | -1.085461366 | 1.154085326  | 10.33752943 |
| MAMLD1:CCDS14693.2   | -0.569187711 | 3.552760974  | 10.33356354 |
| ENTPD8:CCDS7043.1    | -0.723227088 | 0.679756107  | 10.33310754 |
| HIST1H4B:CCDS4572.1  | 1.63253521   | 0.478146442  | 10.33109612 |
| NUAK1:CCDS31892.1    | -0.583613318 | 4.502278913  | 10.32989019 |
| SYTL3:CCDS56458.1    | -0.839037865 | 1.685250024  | 10.32607272 |
| POU2F1:CCDS55656.1   | 0.739493681  | 3.731716109  | 10.32341035 |
| TMEM14C:CCDS4514.1   | -0.908080672 | 5.93856469   | 10.32037066 |
| RAMP3:CCDS5503.1     | -1.664053643 | -0.375430629 | 10.31995313 |
| CLDN24:CCDS54824.1   | -1.382513664 | -0.600159235 | 10.31919568 |
| ERP44:CCDS35082.1    | 0.560109444  | 4.542444808  | 10.31643588 |
| TMEM44:CCDS54698.1   | -0.601294888 | 3.16976954   | 10.31494743 |
| OR5A2:CCDS31560.1    | -1.320822451 | -0.560189188 | 10.31350662 |
| CD300LG:CCDS11470.1  | -0.742945196 | 0.49328024   | 10.31191092 |
| PCSK2:CCDS56180.1    | -0.864866419 | 4.858355275  | 10.31153633 |
| BID:CCDS13748.1      | -0.682794256 | 3.458646346  | 10.30803416 |
| CD80:CCDS2989.1      | -1.423486252 | -0.067326074 | 10.3074885  |
| NIPAL1:CCDS3479.1    | -1.365856995 | 0.588927963  | 10.29664929 |
| TUBB1:CCDS13475.1    | -0.847403436 | 1.420014498  | 10.29362249 |
| FGF14:CCDS9500.1     | -0.712012889 | 1.870487552  | 10.27679814 |
| TYW3:CCDS666.1       | 0.708454862  | 2.145627736  | 10.27659745 |
| CD82:CCDS31469.1     | -0.732392332 | 4.264680174  | 10.27055299 |
| PDXP:CCDS13953.1     | -0.644898699 | 4.039035987  | 10.26641788 |
| PDE9A:CCDS33568.1    | -0.564356266 | 4.980575106  | 10.25905601 |
| PPOX:CCDS1221.1      | 0.544053402  | 4.266497237  | 10.25812346 |
| CHRNA1:CCDS33331.1   | -1.532771105 | 2.199853602  | 10.2536907  |
| ADAMTSL4:CCDS30852.1 | 0.698286352  | 3.226277839  | 10.25202045 |
| CAMKK2:CCDS9216.1    | -0.591794312 | 4.72382266   | 10.25032705 |
| SLC16A14:CCDS2473.1  | 0.581744811  | 4.129443649  | 10.24755698 |
| GRAMD1C:CCDS33826.1  | -0.740271984 | 1.802084109  | 10.24497512 |
| KATNAL1:CCDS31956.1  | 0.563605662  | 3.292047725  | 10.23952223 |
| ZBTB3:CCDS8034.1     | 0.557689075  | 2.664953029  | 10.23743619 |
| SHC3:CCDS6681.1      | -0.62879131  | 4.263671522  | 10.23646519 |
| IKBKAP:CCDS6773.1    | 0.565381032  | 5.698144774  | 10.23458506 |
| SLC7A4:CCDS33608.1   | -0.955824033 | 1.583548356  | 10.23284379 |
| LOXL2:CCDS34864.1    | -1.211249685 | 6.885792951  | 10.23228608 |
| SCN5A:CCDS46799.1    | -1.119017751 | 3.676527297  | 10.23195369 |
| TMEM40:CCDS2613.1    | -1.782203232 | 0.866021502  | 10.22667558 |
| PLCXD2:CCDS2961.1    | -0.64879484  | 1.870354138  | 10.22602721 |
| DENND3:CCDS34947.1   | -0.542684277 | 3.085085107  | 10.22137427 |
| PPP2R2C:CCDS56304.1  | -0.932592375 | 4.155202811  | 10.22052541 |
| KRT10:CCDS11377.1    | -0.638892259 | 3.85879705   | 10.21995008 |
| DUSP6:CCDS9034.1     | -0.767458466 | 3.818520776  | 10.21683758 |

## TAUvsControls

|                       |              |              |             |
|-----------------------|--------------|--------------|-------------|
| PINX1:CCDS47801.1     | -0.557936048 | 3.506436167  | 10.21425905 |
| GIMAP4:CCDS5904.1     | -1.38327689  | 0.237734967  | 10.20782198 |
| CHRM1:CCDS8040.1      | -1.316052249 | 0.982333425  | 10.19854253 |
| SCN5A:CCDS46798.1     | -1.115930441 | 3.662495189  | 10.19520274 |
| CXorf21:CCDS14224.1   | -1.297529971 | -0.510594076 | 10.19227353 |
| RTN1:CCDS9741.1       | -0.861528385 | 7.127361789  | 10.1921308  |
| CARD9:CCDS48057.1     | -0.809945316 | 1.141349479  | 10.19209524 |
| MAP3K10:CCDS12549.1   | -0.71440777  | 5.335595097  | 10.1880158  |
| KIRREL2:CCDS12481.1   | 0.812456661  | 4.771174008  | 10.18745004 |
| WNK4:CCDS11439.1      | -0.613278916 | 2.289514704  | 10.18523564 |
| PTPLA:CCDS7121.1      | -0.840747173 | 0.900608974  | 10.18470613 |
| TAAR2:CCDS5157.1      | -1.330551006 | 0.39372694   | 10.17604452 |
| PAX2:CCDS53569.1      | -1.252892075 | 3.457456403  | 10.17477727 |
| CAMKK2:CCDS44999.1    | -0.593064075 | 4.678639684  | 10.17437586 |
| TNFRSF6B:CCDS13532.1  | -0.583401314 | 1.117128064  | 10.1671054  |
| SCN5A:CCDS46796.1     | -1.115137424 | 3.674633231  | 10.16289342 |
| FAM65C:CCDS13431.2    | -0.942907826 | 2.289533308  | 10.16153117 |
| SCN5A:CCDS46797.1     | -1.114745397 | 3.672443524  | 10.15492668 |
| MIOX:CCDS14092.1      | -0.782237023 | 0.301679694  | 10.14828889 |
| TSHR:CCDS9872.1       | -1.252356205 | 1.353113531  | 10.14277629 |
| INPP5B:CCDS41306.1    | 0.538123048  | 4.006906499  | 10.14165827 |
| P2RY11:CCDS12226.1    | -0.597935561 | 1.935907796  | 10.13937161 |
| BDKRB2:CCDS9942.1     | -1.14364106  | 1.051059838  | 10.1351707  |
| OR52N2:CCDS31399.1    | -1.340173016 | -0.033520139 | 10.12939814 |
| LPHN2:CCDS689.1       | 0.609935475  | 6.207628657  | 10.12073512 |
| TGFB1:CCDS6738.1      | 0.684383119  | 4.175446562  | 10.11978785 |
| MYL9:CCDS13277.1      | -1.476714125 | 4.15252077   | 10.11899804 |
| SCN4A:CCDS45761.1     | -1.366905724 | 2.597231283  | 10.11802259 |
| MFI2:CCDS3326.1       | -0.904569943 | 1.236712832  | 10.11746134 |
| KRTAP27-1:CCDS33532.1 | -1.351691679 | 0.336345217  | 10.11355879 |
| DMKN:CCDS46052.1      | -0.815802563 | 2.510541044  | 10.11254079 |
| GRAMD3:CCDS54892.1    | -0.723864588 | 2.517703028  | 10.10703939 |
| IL7:CCDS56541.1       | -1.357355853 | -0.548266107 | 10.10644045 |
| GSDMD:CCDS34956.1     | -1.012324794 | 1.42106876   | 10.10602605 |
| TMEM8C:CCDS35170.1    | -2.219854028 | 1.046484909  | 10.10370001 |
| VIPR1:CCDS2698.1      | -0.790219181 | 1.168549556  | 10.10205346 |
| SYTL3:CCDS34563.1     | -0.828665633 | 1.507924878  | 10.09676595 |
| SIGLEC14:CCDS42604.1  | -0.73602759  | 0.489464282  | 10.09570371 |
| APOBEC1:CCDS8579.1    | -1.282791494 | -0.349079587 | 10.09067887 |
| ARHGEF33:CCDS46263.2  | -0.642020318 | 1.545716457  | 10.08626294 |
| SYT7:CCDS31577.1      | -0.86356312  | 5.248076575  | 10.08323478 |
| MET:CCDS47689.1       | -0.661523531 | 2.559497011  | 10.07968803 |
| C5orf47:CCDS47343.1   | -1.346059927 | -0.718465698 | 10.07654111 |
| MUSK:CCDS48005.1      | -1.237871116 | 1.777625094  | 10.07309929 |
| GPR173:CCDS14349.1    | -0.61522449  | 3.729424785  | 10.0722879  |
| SIRPG:CCDS13020.2     | -0.887107369 | 0.800979512  | 10.07113691 |
| PCSK2:CCDS56179.1     | -0.843326939 | 4.746630063  | 10.0652875  |
| APOL6:CCDS13919.1     | -1.071415758 | 0.318725155  | 10.06280854 |
| MRPL36:CCDS3865.1     | -0.76154684  | 3.782984036  | 10.06189381 |
| ZNF486:CCDS46029.1    | -0.750482838 | 2.072694964  | 10.06103324 |
| ZNF396:CCDS11913.1    | -0.749636212 | 0.545941255  | 10.06066712 |

## TAUvsControls

|                      |              |              |             |
|----------------------|--------------|--------------|-------------|
| OPRM1:CCDS55068.1    | -0.895870059 | 0.520340871  | 10.04814511 |
| USP6:CCDS11069.2     | -0.502831428 | 2.652801112  | 10.04731729 |
| HSD11B1L:CCDS12144.1 | -0.679196718 | 3.213285923  | 10.04693957 |
| IL31RA:CCDS56367.1   | -0.903953127 | 1.042412252  | 10.0452851  |
| PABPC1:CCDS6289.1    | 0.541067401  | 9.504230687  | 10.03980245 |
| CCL21:CCDS6571.1     | -1.495806067 | 0.748600553  | 10.036724   |
| CCK:CCDS2696.1       | -1.409638264 | -0.333896679 | 10.03515174 |
| SP110:CCDS2476.1     | -1.057330273 | 3.423686347  | 10.03398423 |
| KLF15:CCDS3036.1     | -0.738064498 | 1.979529308  | 10.03352876 |
| ALPK1:CCDS3697.1     | -0.802744866 | 2.49748935   | 10.03051115 |
| CCDC92:CCDS9256.1    | -0.54396343  | 4.974306301  | 10.02931625 |
| ARPP19:CCDS32242.1   | -0.54874557  | 4.62131032   | 10.0258026  |
| SCN5A:CCDS54569.1    | -1.105140296 | 3.618885915  | 10.02524715 |
| ST8SIA3:CCDS32834.1  | -0.727233729 | 1.273077901  | 10.01547402 |
| GPR64:CCDS14191.1    | -0.835005144 | 2.988995031  | 10.01205528 |
| MET:CCDS43636.1      | -0.658679963 | 2.550306264  | 10.01037472 |
| PANX2:CCDS14085.2    | -0.785707719 | 2.919722743  | 10.00828272 |
| CNTF:CCDS31554.1     | -1.260415628 | -0.493223517 | 10.00652243 |
| ING1:CCDS9515.1      | -0.701859113 | 3.460573821  | 10.00260767 |
| GPSM1:CCDS6996.2     | -0.633606909 | 5.741933017  | 10.00013166 |
| MAOB:CCDS14261.1     | -0.763655273 | 1.701470956  | 10.00012997 |
| GYPB:CCDS54809.1     | -1.476841334 | -0.475202865 | 9.991613195 |
| GPR64:CCDS43923.1    | -0.833564965 | 2.992831139  | 9.991227653 |
| SLC22A7:CCDS4893.2   | -0.823387243 | 1.268560559  | 9.989430295 |
| CADM3:CCDS1182.1     | -0.708541213 | 6.441308436  | 9.987791402 |
| RTN4RL1:CCDS45569.1  | -0.663684474 | 2.942118536  | 9.986215584 |
| MR1:CCDS53440.1      | -0.847653147 | 0.570580111  | 9.983283254 |
| GPR64:CCDS43922.1    | -0.830031535 | 2.95664704   | 9.970802487 |
| FOLR2:CCDS8212.1     | -0.864455838 | -0.128801537 | 9.968650224 |
| SPDYE2:CCDS34716.2   | 0.829340303  | 5.169418677  | 9.968508204 |
| CMBL:CCDS3878.1      | 0.603029331  | 3.72899245   | 9.967118402 |
| MOV10L1:CCDS54542.1  | -1.068504862 | 3.720251113  | 9.965026014 |
| AQP1:CCDS55097.1     | -0.89273446  | 1.304041491  | 9.960988725 |
| SP8:CCDS43555.1      | -0.802779907 | 2.37352222   | 9.958733762 |
| HIVEP3:CCDS463.1     | -0.64705106  | 3.604380128  | 9.955854669 |
| CAPNS2:CCDS54010.1   | -0.834801607 | -0.511448043 | 9.947641706 |
| HSD11B1L:CCDS12146.1 | -0.700143392 | 3.095205029  | 9.94609493  |
| GLTSCR2:CCDS12705.1  | 0.664552656  | 9.09824173   | 9.942369437 |
| HIVEP3:CCDS44124.1   | -0.646336808 | 3.603933968  | 9.932360288 |
| MTUS2:CCDS41874.1    | -0.908215479 | 1.994669754  | 9.928354438 |
| SP110:CCDS54435.1    | -1.051253009 | 3.432869951  | 9.926694735 |
| IL8:CCDS34005.1      | -1.428641404 | -0.693117644 | 9.919410559 |
| HDAC8:CCDS55451.1    | -0.51541155  | 3.162614337  | 9.914156535 |
| BCL11B:CCDS9950.1    | -1.17486562  | 3.267642204  | 9.913181624 |
| KCNIP4:CCDS43215.1   | -1.339691754 | 1.181419106  | 9.912729412 |
| CCDC134:CCDS33654.1  | 0.774476059  | 2.422398839  | 9.912095366 |
| NEU4:CCDS54442.1     | -0.650519873 | 0.612488477  | 9.91167989  |
| LIX1L:CCDS915.1      | 0.70687153   | 4.541313269  | 9.910972332 |
| DPPA3:CCDS8582.1     | -0.973530134 | -0.315723052 | 9.910134001 |
| BCL3:CCDS12642.2     | -0.777901693 | 2.545450558  | 9.90672625  |
| DNASE2B:CCDS44167.1  | -1.083374163 | 0.281580386  | 9.903412485 |



## TAUvsControls

|                      |              |              |             |
|----------------------|--------------|--------------|-------------|
| PAPLN:CCDS32114.1    | -0.621311631 | 2.534036464  | 9.888760924 |
| AGTR2:CCDS14569.1    | -1.3051119   | 0.200713312  | 9.879704184 |
| CADM3:CCDS44251.1    | -0.720240922 | 6.376469477  | 9.877729762 |
| PPP1R14D:CCDS10066.1 | -0.912801533 | -0.553960113 | 9.87640916  |
| ESR2:CCDS9762.1      | -0.666235456 | 1.177838917  | 9.864476217 |
| ID2:CCDS1659.1       | -0.597611296 | 4.738730445  | 9.863791357 |
| GOLIM4:CCDS3204.1    | 0.742867593  | 5.644586481  | 9.859274069 |
| MAPK10:CCDS34026.1   | 0.609774693  | 5.283556822  | 9.848259545 |
| MMP17:CCDS31927.1    | -0.725620081 | 4.428410763  | 9.841449864 |
| GRAMD3:CCDS4136.1    | -0.719446345 | 2.476571632  | 9.841111072 |
| C19orf48:CCDS12803.1 | 0.910213734  | 4.031521768  | 9.836018929 |
| GBX1:CCDS43682.1     | -0.836207695 | 0.206295855  | 9.834347655 |
| GDNF:CCDS3922.1      | -0.878259746 | -0.543167359 | 9.831898168 |
| PANX2:CCDS54544.1    | -0.781576304 | 2.891588023  | 9.828511858 |
| C2orf54:CCDS42839.1  | -0.726287623 | 0.523925094  | 9.827953732 |
| MNX1:CCDS34788.1     | -0.778786594 | 1.143172668  | 9.827550774 |
| TRPV2:CCDS32576.1    | -0.709783725 | 2.140267479  | 9.825624862 |
| ZNF561:CCDS12216.2   | 0.571536542  | 2.897055193  | 9.82471312  |
| FAXC:CCDS34500.1     | -0.700717511 | 4.03237909   | 9.820445056 |
| GAS8:CCDS10992.1     | -1.980007126 | 7.330035151  | 9.818176493 |
| NFATC1:CCDS32850.1   | -0.639562643 | 3.374497151  | 9.817849541 |
| FAM111B:CCDS44611.1  | -0.704218489 | 1.429366006  | 9.817662658 |
| SIRPG:CCDS33434.1    | -0.879296916 | 0.262161754  | 9.81666149  |
| KCNK2:CCDS41466.1    | -0.59028574  | 2.470454147  | 9.815654457 |
| ATF7:CCDS44906.1     | 0.628900001  | 3.392207271  | 9.814295115 |
| UBQLNL:CCDS31385.1   | -0.790077085 | 0.278606763  | 9.811275094 |
| DISC1:CCDS53483.1    | -0.67292831  | 2.347452456  | 9.809148642 |
| PSMB8:CCDS4757.1     | -0.998811363 | 2.906402111  | 9.805313502 |
| APTX:CCDS47956.1     | 0.547148673  | 3.758951398  | 9.802704743 |
| IAH1:CCDS42651.1     | -1.207097196 | 3.082021891  | 9.802499155 |
| GNRH2:CCDS13040.1    | -1.055824732 | -0.35813491  | 9.798934198 |
| GRIK5:CCDS12595.1    | -0.641833362 | 6.287758355  | 9.791955871 |
| JAG2:CCDS9999.1      | -0.649216601 | 4.03638886   | 9.791920422 |
| ELANE:CCDS12045.1    | -0.937634421 | -0.370737455 | 9.789149329 |
| ZNF121:CCDS32902.1   | 0.798271124  | 1.743686286  | 9.78727901  |
| NONO:CCDS55445.1     | 0.58049046   | 8.414929859  | 9.786615243 |
| YAF2:CCDS53778.1     | -0.61593024  | 2.520570852  | 9.785858665 |
| PSMB8:CCDS4756.1     | -0.964751074 | 2.831624656  | 9.783249411 |
| TCF7L2:CCDS55729.1   | 0.657763609  | 4.573735103  | 9.782330851 |
| ABLIM2:CCDS47011.1   | -0.748528186 | 3.448233364  | 9.779924192 |
| SMU1:CCDS6534.1      | 0.648628984  | 5.363347891  | 9.778383807 |
| MARCH2:CCDS32894.1   | 0.723068944  | 4.560045184  | 9.777502866 |
| MRPL34:CCDS12356.1   | -0.762052502 | 2.99763086   | 9.764817016 |
| B4GALNT3:CCDS8504.1  | -1.062212422 | 3.545340893  | 9.754321436 |
| AGFG2:CCDS5697.1     | -0.662101082 | 3.217480302  | 9.751537439 |
| DMRTA1:CCDS6514.1    | -0.698138796 | 0.701290901  | 9.751521053 |
| GRAMD3:CCDS54893.1   | -0.73036276  | 2.393388678  | 9.739327291 |
| SELPLG:CCDS55881.1   | -0.674640774 | 0.724622315  | 9.738767884 |
| GABRA5:CCDS45194.1   | -1.048018066 | 2.89449807   | 9.734736405 |
| PDE9A:CCDS42942.1    | -0.548410484 | 4.974317453  | 9.731450018 |
| MMP3:CCDS8323.1      | -1.790637748 | 1.44555151   | 9.723691783 |

## TAUvsControls

|                       |              |              |             |
|-----------------------|--------------|--------------|-------------|
| CELA2A:CCDS157.1      | -0.743937809 | 0.063918842  | 9.723551872 |
| NAPEPLD:CCDS5729.1    | -0.932445014 | 2.486238125  | 9.72136023  |
| PTX4:CCDS32362.1      | -0.806387942 | -0.052660908 | 9.71922739  |
| CAV3:CCDS2569.1       | -1.807836481 | -0.29163545  | 9.714107156 |
| HAS1:CCDS12838.1      | -0.855234534 | 1.475381915  | 9.704339419 |
| CD200R1:CCDS46889.1   | -1.292016591 | -0.449597879 | 9.701934451 |
| CLDN10:CCDS9476.1     | -0.775924574 | 0.106602924  | 9.700844522 |
| LMCD1:CCDS33688.1     | -0.763092875 | 3.748311387  | 9.69754421  |
| SCN1B:CCDS12441.1     | -0.973384285 | 1.000239153  | 9.696522896 |
| ZNF655:CCDS34695.1    | 0.711298693  | 1.236763113  | 9.694126491 |
| PNKD:CCDS2413.1       | -0.691711402 | 2.876301719  | 9.691029113 |
| JAG2:CCDS9998.1       | -0.645860321 | 4.086551781  | 9.690934194 |
| SS18L1:CCDS13491.1    | -0.588697668 | 4.15279201   | 9.689842514 |
| ZNF521:CCDS32806.1    | 0.565130189  | 5.701670474  | 9.68767285  |
| GPR84:CCDS8878.1      | -0.891375364 | 0.228821711  | 9.685130763 |
| LARP1:CCDS4328.1      | 0.497155084  | 7.169953423  | 9.683783487 |
| TNNT3:CCDS41594.1     | -1.727390644 | 3.596572315  | 9.681816181 |
| INPP5J:CCDS46687.1    | -0.656769423 | 3.836911329  | 9.671460506 |
| RDH12:CCDS9787.1      | -0.781302923 | 0.300195164  | 9.671271221 |
| ST6GALNAC4:CCDS6883.1 | 0.596239131  | 4.30425492   | 9.670627332 |
| AQP1:CCDS55096.1      | -0.915194066 | 1.197466559  | 9.670193741 |
| CALCR:CCDS5631.1      | -1.387541421 | 0.934953323  | 9.669854039 |
| PPFIA4:CCDS44296.1    | -0.784010209 | 2.803489403  | 9.668755925 |
| DRD1:CCDS4393.1       | -0.903976551 | 0.38595751   | 9.668428066 |
| TLL1:CCDS3811.1       | -0.78990563  | 2.06719022   | 9.667647351 |
| TMEM225:CCDS31697.1   | -1.284471478 | 0.418029584  | 9.666611239 |
| MYH8:CCDS11153.1      | -1.543338656 | 3.751893216  | 9.663569346 |
| KCNK3:CCDS1727.1      | -0.722384888 | 3.127333867  | 9.658191154 |
| C19orf12:CCDS12418.2  | -0.658121233 | 2.240144169  | 9.657265763 |
| HIST1H2AC:CCDS4585.1  | -0.778837471 | 1.298238514  | 9.653220487 |
| GCNT3:CCDS10172.1     | -0.831661179 | 0.043799598  | 9.65243885  |
| CDR1:CCDS14670.1      | 1.098635904  | 4.067743691  | 9.651195082 |
| TMEM158:CCDS54573.1   | -0.835726254 | 3.366710397  | 9.649005594 |
| WNT2:CCDS5771.1       | -1.411321547 | 1.152284711  | 9.643196025 |
| ZFYVE28:CCDS54709.1   | -0.762088092 | 0.608660074  | 9.64089218  |
| GNAT3:CCDS47625.1     | -0.860907971 | 0.29887838   | 9.640301412 |
| SNAP25:CCDS13109.1    | -0.938765605 | 5.185394808  | 9.639794557 |
| MXRA7:CCDS32745.1     | 0.785266141  | 5.30542572   | 9.639681213 |
| PDC:CCDS41447.1       | -1.824448888 | -0.426419673 | 9.636864702 |
| DQX1:CCDS1949.2       | -0.658740345 | 1.170676811  | 9.635606963 |
| KCNIP4:CCDS43217.1    | -1.319570245 | 1.21208802   | 9.635297987 |
| PTCHD1:CCDS35215.2    | -0.80650999  | 1.67472568   | 9.634587854 |
| KCNC1:CCDS7827.1      | -0.577945525 | 2.731285059  | 9.632382813 |
| CATSPERD:CCDS12149.2  | -0.621795371 | 1.599240217  | 9.632159995 |
| TYW3:CCDS53334.1      | 0.737150534  | 1.920321124  | 9.628766163 |
| GPR64:CCDS55378.1     | -0.822532192 | 2.9504235    | 9.62222934  |
| TNNT3:CCDS41595.1     | -1.725527572 | 3.540564032  | 9.618959954 |
| SYNRG:CCDS54114.1     | 0.484178228  | 5.279617931  | 9.618517537 |
| EVI2B:CCDS11266.1     | -0.849350158 | 0.253538867  | 9.618140446 |
| CHAT:CCDS7232.1       | -0.757877295 | 1.908523156  | 9.617334456 |
| DNAI2:CCDS11697.1     | -0.74740334  | 1.172145333  | 9.612717174 |

## TAUvsControls

|                      |              |              |             |
|----------------------|--------------|--------------|-------------|
| HIST1H2BK:CCDS4621.1 | -0.667606418 | 2.822701153  | 9.608890692 |
| SLC18A1:CCDS47814.1  | -0.727352081 | 2.941013844  | 9.608371497 |
| KREMEN2:CCDS10484.1  | -0.794873863 | 1.662257731  | 9.607532384 |
| METRNL:CCDS32779.1   | -0.812951794 | 4.794150315  | 9.60402542  |
| P2RX5:CCDS11035.1    | -0.888573078 | 2.065473394  | 9.602299465 |
| PWWP2B:CCDS44497.1   | -0.577267039 | 2.795105854  | 9.601391702 |
| HMX1:CCDS47018.1     | -1.401702554 | 2.018738288  | 9.598065571 |
| LYNX1:CCDS6389.1     | 1.098909392  | 0.642230538  | 9.596782465 |
| GRIN3A:CCDS6758.1    | -0.784961448 | 2.344387407  | 9.592045641 |
| TM2D2:CCDS43733.1    | -0.607762792 | 2.791965385  | 9.590831964 |
| GPR64:CCDS55377.1    | -0.818894549 | 2.913136944  | 9.587915619 |
| CNIH2:CCDS8131.1     | -0.877242777 | 6.616953689  | 9.586668572 |
| PDE9A:CCDS33569.1    | -0.542020183 | 4.964651166  | 9.584610666 |
| GRAMD3:CCDS54891.1   | -0.718363757 | 2.414708554  | 9.582696445 |
| FBXL13:CCDS47678.1   | -0.7528768   | 2.798795849  | 9.580024413 |
| BBX:CCDS2950.1       | 0.606103517  | 4.137445242  | 9.57925745  |
| MOV10L1:CCDS54541.1  | -1.048981473 | 3.708127895  | 9.577431229 |
| P2RX5:CCDS56014.1    | -0.885354951 | 2.066245722  | 9.57415483  |
| IRAK2:CCDS33697.1    | -0.846321132 | 1.832696375  | 9.571724194 |
| GH1:CCDS11654.1      | -0.99592329  | -0.306468879 | 9.568694554 |
| MR1:CCDS53441.1      | -0.889244446 | 0.33878265   | 9.568458813 |
| CD8A:CCDS1992.1      | -0.964449251 | 0.240465062  | 9.565172644 |
| GABRG1:CCDS3470.1    | -1.154427821 | 0.848489531  | 9.5618995   |
| PTGS2:CCDS1371.1     | -1.127881812 | 1.087722383  | 9.560214845 |
| CECR1:CCDS13742.1    | 1.047870258  | 3.46263905   | 9.554390977 |
| LRTOMT:CCDS55778.1   | 0.588175803  | 2.452743983  | 9.552249329 |
| TPR:CCDS41446.1      | 0.656875712  | 6.534330419  | 9.551592849 |
| YAF2:CCDS31775.1     | -0.610677184 | 3.013247179  | 9.551456253 |
| CCDC71L:CCDS55151.1  | -0.750187501 | 1.544454577  | 9.551237555 |
| HDAC8:CCDS14420.1    | -0.451472848 | 3.607267223  | 9.550752016 |
| C1orf168:CCDS30729.1 | -1.068076065 | 1.401546769  | 9.543610448 |
| RTN4IP1:CCDS5056.1   | -0.616517279 | 2.044797324  | 9.541959984 |
| INMT:CCDS5430.1      | -1.652040325 | 0.931109416  | 9.541797725 |
| TBX3:CCDS9175.1      | -1.113327413 | 2.149476     | 9.541373571 |
| CNR1:CCDS5015.1      | -0.595900253 | 4.682163624  | 9.539279421 |
| GPR64:CCDS43921.1    | -0.815782524 | 2.910100147  | 9.533119101 |
| FXVD3:CCDS46049.1    | -1.254278765 | -0.576178413 | 9.53188388  |
| FAM43A:CCDS33923.1   | -0.96854994  | 3.020644775  | 9.527121473 |
| IL21R:CCDS10630.1    | -0.751096856 | 1.158042765  | 9.525122552 |
| NFAM1:CCDS14034.1    | -1.026373808 | 0.483068314  | 9.523253781 |
| SLC24A4:CCDS9903.2   | -0.661681171 | 1.546084725  | 9.522861834 |
| IFI27L1:CCDS9919.1   | -0.563486865 | 4.526753087  | 9.522113476 |
| DNAAF2:CCDS9691.2    | -0.515128829 | 2.685549659  | 9.521479455 |
| PCDHB4:CCDS4246.1    | -0.596950199 | 2.316081434  | 9.51975093  |
| TTC16:CCDS6875.1     | -0.598266651 | 1.582288468  | 9.515414357 |
| C5orf15:CCDS4167.1   | -0.522199315 | 3.774557679  | 9.515382189 |
| NSL1:CCDS1509.1      | -0.502010627 | 3.528115184  | 9.514910805 |
| CDV3:CCDS46917.1     | 0.571878951  | 4.459002964  | 9.513757165 |
| IMPG1:CCDS4985.1     | -1.42318589  | 1.783012104  | 9.509963638 |
| TNNT3:CCDS41596.1    | -1.713166503 | 3.534361941  | 9.506240992 |
| MYBL1:CCDS47867.1    | -0.603982341 | 1.882238958  | 9.505976839 |

## TAUvsControls

|                      |              |              |             |
|----------------------|--------------|--------------|-------------|
| SLC30A3:CCDS1743.1   | -1.054826079 | 1.416189934  | 9.505773273 |
| C10orf10:CCDS7210.1  | -0.706722055 | 1.444598071  | 9.50535818  |
| APTX:CCDS6532.1      | 0.543634843  | 3.733049446  | 9.503993495 |
| TPSAB1:CCDS10431.1   | -0.874153753 | -0.199422431 | 9.50397193  |
| ANO10:CCDS56247.1    | 0.584461878  | 3.93171347   | 9.503159371 |
| RGAG1:CCDS14552.1    | -0.738219467 | 2.09667892   | 9.503132499 |
| MND1:CCDS3782.1      | 0.859577911  | 1.878131592  | 9.50309533  |
| SH2D2A:CCDS53380.1   | -0.805260713 | 0.771357173  | 9.50249271  |
| ST6GALNAC5:CCDS673.1 | -0.705293514 | 2.948793784  | 9.501009681 |
| BBX:CCDS46881.1      | 0.603224676  | 4.190735264  | 9.499880452 |
| MAFK:CCDS5325.1      | -0.592210945 | 2.11365272   | 9.493188086 |
| INMT:CCDS56479.1     | -1.647663416 | 0.928667546  | 9.488793105 |
| SLC6A20:CCDS43077.1  | -0.767078626 | 1.446082867  | 9.486606923 |
| KIAA1598:CCDS44482.1 | -0.742331116 | 4.869225235  | 9.486330348 |
| KCNMB3:CCDS43173.1   | -0.806235855 | 0.191483214  | 9.482989246 |
| DGAT2:CCDS31642.1    | -0.580511919 | 1.74898514   | 9.47942647  |
| FAM111B:CCDS7972.1   | -0.675751531 | 1.579054387  | 9.478786435 |
| YAP1:CCDS53700.1     | 0.655146505  | 4.935945816  | 9.467940949 |
| NOXO1:CCDS42101.1    | -0.87045326  | 1.238315588  | 9.466159747 |
| PDE9A:CCDS33570.1    | -0.553567516 | 4.837381023  | 9.460283281 |
| ZFP3:CCDS11067.1     | -0.92021771  | 0.323709386  | 9.460048213 |
| RPL26L1:CCDS4382.1   | -0.91534625  | 4.205191536  | 9.456527297 |
| SYNRG:CCDS11322.2    | 0.482573958  | 5.212792107  | 9.455192888 |
| FOS:CCDS9841.1       | -0.89656082  | 3.753452633  | 9.454387834 |
| XPC:CCDS46763.1      | 0.577500101  | 5.600971143  | 9.45436031  |
| VCAN:CCDS54876.1     | 0.710344764  | 7.514741606  | 9.453459916 |
| NR4A3:CCDS6743.1     | -0.718590957 | 2.179809371  | 9.452693387 |
| MOV10L1:CCDS14084.1  | -1.038680894 | 3.734521697  | 9.451277096 |
| MITF:CCDS43106.1     | -0.651692085 | 2.016252443  | 9.450247229 |
| UPB1:CCDS13827.1     | -0.788652996 | 0.721804957  | 9.449460431 |
| ADAM17:CCDS1665.1    | 0.504014682  | 4.968259593  | 9.448034142 |
| PPP1R16B:CCDS13309.1 | -0.646182011 | 2.433910215  | 9.442556057 |
| ING1:CCDS9518.1      | -0.735942967 | 3.328289383  | 9.44167461  |
| SMARCC1:CCDS2758.1   | 0.728269408  | 6.727693469  | 9.440271746 |
| UBE3D:CCDS34491.1    | -0.597833106 | 1.720564939  | 9.436189764 |
| TMOD4:CCDS988.1      | -0.736921839 | 0.913863318  | 9.434951414 |
| AASS:CCDS5783.1      | 0.538919362  | 3.884172422  | 9.431650541 |
| GPR179:CCDS42308.1   | -1.046484038 | 2.566786189  | 9.431494264 |
| LBH:CCDS33173.1      | -0.650949543 | 4.747907822  | 9.427930465 |
| APTX:CCDS56568.1     | 0.528110521  | 3.600190386  | 9.427568561 |
| CCDC166:CCDS55280.1  | -0.822163103 | 0.152186915  | 9.42677682  |
| VAX2:CCDS1911.1      | -0.84871618  | 2.834472698  | 9.424769079 |
| MAPK10:CCDS3612.1    | 0.613788261  | 5.226646142  | 9.423088743 |
| SLC6A20:CCDS2730.1   | -0.745186435 | 1.357365339  | 9.420832024 |
| TROVE2:CCDS1379.1    | 0.668989761  | 3.26650404   | 9.419775951 |
| GPRASP2:CCDS14501.1  | 0.571456669  | 4.664941118  | 9.417810861 |
| TTC36:CCDS31687.1    | -0.786770534 | 0.189921949  | 9.416666449 |
| MED12:CCDS43970.1    | 0.585234875  | 6.879188884  | 9.416642068 |
| GNLY:CCDS1984.1      | -0.874871556 | -0.199765818 | 9.412592002 |
| AVPR1A:CCDS8965.1    | -1.171060358 | 0.332178757  | 9.410148168 |
| CNR1:CCDS5016.2      | -0.592735802 | 4.68119121   | 9.409457151 |

## TAUvsControls

|                      |              |              |             |
|----------------------|--------------|--------------|-------------|
| LTBP2:CCDS9831.1     | -1.173872388 | 5.59046878   | 9.409284709 |
| IGF1R:CCDS10378.1    | 0.568351895  | 6.211215061  | 9.404786588 |
| DEPDC7:CCDS41633.1   | -0.655524174 | 1.081840089  | 9.400255363 |
| PICK1:CCDS13965.1    | -0.596764151 | 4.800211206  | 9.399879051 |
| PGC:CCDS55000.1      | -0.797031359 | 0.511548213  | 9.398533258 |
| CDH20:CCDS11977.1    | -0.853520494 | 4.199654932  | 9.395351065 |
| TPO:CCDS1646.1       | -0.751334558 | 1.859815102  | 9.394234507 |
| CHN2:CCDS5420.1      | -0.71807285  | 3.825495578  | 9.389307179 |
| WISP1:CCDS6371.1     | -0.964165819 | 1.15178333   | 9.387963155 |
| TSPYL6:CCDS42682.1   | -0.694224647 | 1.386898642  | 9.385633576 |
| NIPAL2:CCDS6278.1    | -1.139302887 | 0.783156138  | 9.383391672 |
| KCNIP4:CCDS3428.1    | -1.326018335 | 1.188111072  | 9.379982686 |
| LRR3B:CCDS2644.1     | -0.910113614 | 2.119265281  | 9.379318167 |
| HNRNPH1:CCDS4446.1   | 0.624681242  | 7.276689992  | 9.379031255 |
| SIGLEC10:CCDS54305.1 | -0.619310198 | 1.370715029  | 9.376776412 |
| FGF17:CCDS6019.1     | -1.008881642 | 0.221189317  | 9.374730365 |
| P2RX5:CCDS56015.1    | -0.87019905  | 2.162502452  | 9.374218933 |
| ZNF577:CCDS46160.1   | 0.795569873  | 1.551186154  | 9.373863846 |
| OR2B6:CCDS4642.1     | -0.90207221  | -0.518767368 | 9.366950589 |
| FBXL13:CCDS5726.1    | -0.743639325 | 2.848427409  | 9.355551765 |
| STXBP2:CCDS45948.1   | -0.611471753 | 3.086818687  | 9.353623913 |
| P2RX5:CCDS11034.1    | -0.867119319 | 2.163226575  | 9.351473724 |
| TNNT3:CCDS7727.1     | -1.702885153 | 3.62475917   | 9.347149644 |
| C15orf54:CCDS10049.1 | -1.36631298  | -0.859428276 | 9.345490383 |
| ARHGAP9:CCDS44929.1  | -0.641884988 | 2.159403277  | 9.342058886 |
| NECAB1:CCDS47889.1   | -0.76656709  | 1.437930531  | 9.340437652 |
| EPB41L2:CCDS47474.1  | 0.635195343  | 4.812771208  | 9.340050503 |
| FGF8:CCDS7518.1      | -0.920228222 | 0.665785752  | 9.339028552 |
| SYT16:CCDS45121.1    | -0.757669563 | 1.773904397  | 9.328566951 |
| NEU4:CCDS2553.1      | -0.596370766 | 0.90849487   | 9.325017169 |
| XPC:CCDS46764.1      | 0.573626515  | 5.587745357  | 9.320218421 |
| WSCD1:CCDS32538.1    | -0.779406954 | 5.595190303  | 9.317085455 |
| RWDD3:CCDS44177.1    | -0.770829384 | 1.670385856  | 9.316873448 |
| CBX4:CCDS32758.1     | -0.570992756 | 5.528681242  | 9.315758865 |
| FLT1:CCDS53861.1     | -0.86238688  | 1.782501     | 9.305044321 |
| ZNF235:CCDS33048.1   | -0.704536489 | 1.879507328  | 9.304372064 |
| SFRP4:CCDS5453.1     | -1.188056252 | 4.702902654  | 9.303791386 |
| SLC25A34:CCDS162.1   | -0.729342802 | 0.210017633  | 9.302950305 |
| GTF2H2:CCDS34183.1   | 0.531975369  | 3.738253606  | 9.30155627  |
| ZNF71:CCDS12947.1    | -0.619188566 | 4.171565561  | 9.292989034 |
| TMEM71:CCDS47921.1   | -0.812887909 | 0.186949645  | 9.292793122 |
| ACTR3B:CCDS5934.1    | -0.585609698 | 4.444914383  | 9.292151229 |
| CA10:CCDS32684.1     | -0.745932843 | 2.046115044  | 9.289369591 |
| IER3:CCDS4689.1      | -0.811867702 | 1.643419326  | 9.285420912 |
| PRKG2:CCDS3589.1     | -0.889701483 | 1.615254584  | 9.284979604 |
| MEI1:CCDS46718.1     | -0.622722453 | 2.527786837  | 9.280397947 |
| FOXF1:CCDS10957.2    | -0.817689625 | 0.291917266  | 9.27941042  |
| MYD88:CCDS54566.1    | -0.849162535 | 1.12432709   | 9.2792255   |
| HOOK3:CCDS6139.1     | 0.673202862  | 3.896473952  | 9.271912881 |
| IL25:CCDS9597.1      | -1.365632581 | -0.9012401   | 9.269132964 |
| C2orf16:CCDS42666.1  | -0.663982136 | 2.374127834  | 9.268576378 |

## TAUvsControls

|                      |              |              |             |
|----------------------|--------------|--------------|-------------|
| NOXO1:CCDS10455.1    | -0.864310811 | 1.222183344  | 9.267187477 |
| AOX1:CCDS33360.1     | -0.861026224 | 2.62631621   | 9.264895127 |
| CLUAP1:CCDS45398.1   | 0.53678157   | 3.370755866  | 9.261708613 |
| YAP1:CCDS53699.1     | 0.653896039  | 5.043091336  | 9.253969195 |
| TCFL5:CCDS13506.1    | 0.540001398  | 3.523231886  | 9.251443006 |
| PDE9A:CCDS42943.1    | -0.542104634 | 4.896613399  | 9.249950739 |
| PLCB2:CCDS42020.1    | -0.659622289 | 2.570338936  | 9.248843133 |
| HGD:CCDS3000.1       | -0.882508877 | 0.809730627  | 9.248492187 |
| NEU4:CCDS54441.1     | -0.589299016 | 0.966367451  | 9.246116546 |
| EYA4:CCDS43506.1     | -0.692922921 | 2.153349749  | 9.242083553 |
| KLHDC7A:CCDS185.2    | -0.785704123 | 0.868347837  | 9.240618876 |
| TBX3:CCDS9176.1      | -1.109403189 | 2.236962531  | 9.240292107 |
| C16orf93:CCDS32434.2 | 0.778951306  | 3.300745872  | 9.238394567 |
| CBLC:CCDS46109.1     | -1.43672045  | 1.20943417   | 9.235389872 |
| CLDN6:CCDS10488.1    | -1.096167871 | 0.284120112  | 9.234237514 |
| PLCG2:CCDS42204.1    | -0.974264669 | 2.701016086  | 9.234166127 |
| REG3G:CCDS1962.1     | -0.929391604 | -0.353643257 | 9.228416808 |
| C19orf73:CCDS42589.1 | -0.750932352 | -0.394456908 | 9.22774268  |
| YAP1:CCDS8314.2      | 0.652472     | 4.911792864  | 9.227440612 |
| IFNE:CCDS34997.1     | -1.313945071 | -0.693736052 | 9.221705888 |
| TPD52L1:CCDS34527.1  | -0.849733287 | 2.906126257  | 9.220792594 |
| UGT1A1:CCDS2510.1    | -0.920464624 | 0.787958407  | 9.210700168 |
| HLX:CCDS1527.1       | -1.011520276 | 1.438958211  | 9.207497569 |
| IMMT:CCDS46357.1     | 0.433620181  | 6.262671813  | 9.20719596  |
| ZMAT3:CCDS3224.1     | 0.762182972  | 3.751940977  | 9.204898359 |
| TMEM164:CCDS55475.1  | -0.614085792 | 2.271615596  | 9.203590958 |
| MLPH:CCDS2518.1      | -0.931338942 | 1.658863076  | 9.199067681 |
| FAM122A:CCDS6623.1   | -0.501625366 | 3.295297381  | 9.195220754 |
| VWC2:CCDS5508.1      | -0.879495623 | 0.592586346  | 9.194282314 |
| C1orf177:CCDS599.1   | -0.712441903 | 0.421910428  | 9.19211409  |
| DOC2A:CCDS10666.1    | -0.640581427 | 2.403870685  | 9.1905969   |
| ZMAT3:CCDS46962.1    | 0.761577097  | 3.751275895  | 9.1864289   |
| LTB4R2:CCDS9625.2    | -0.734928642 | 0.08762266   | 9.185799602 |
| CRHR2:CCDS56477.1    | -0.642758639 | 1.242861771  | 9.185149884 |
| EYA4:CCDS5165.1      | -0.700727861 | 2.264390956  | 9.180970318 |
| CAMKK2:CCDS9219.1    | -0.553470386 | 4.462218997  | 9.17943601  |
| TM2D2:CCDS6111.1     | -0.545258461 | 3.074363051  | 9.178124481 |
| NPHP1:CCDS46384.1    | -0.651973298 | 2.150487217  | 9.178083225 |
| SLC6A6:CCDS33705.1   | -0.700087655 | 3.030788902  | 9.176225837 |
| STXBP2:CCDS12181.1   | -0.609725675 | 3.094907674  | 9.173308843 |
| GJC2:CCDS1569.1      | -0.814718116 | 0.940571053  | 9.166906936 |
| SLC18A1:CCDS6013.1   | -0.720397249 | 2.975695971  | 9.163734782 |
| RAB2B:CCDS9570.1     | 0.490704135  | 4.424889797  | 9.163188185 |
| SNAP25:CCDS13110.1   | -0.892861889 | 5.134844609  | 9.159421619 |
| ADAM12:CCDS7654.1    | -0.824848037 | 3.817864177  | 9.157952885 |
| TCF7L2:CCDS53578.1   | 0.630554642  | 4.460947371  | 9.154747629 |
| HLA-DQA2:CCDS4753.1  | -1.566433911 | 0.304385489  | 9.154125722 |
| HSPA4L:CCDS3734.1    | 0.569931965  | 4.245887324  | 9.146189352 |
| NAP1L5:CCDS3632.1    | 0.624359047  | 2.764263134  | 9.142995688 |
| ARHGDI8:CCDS8671.1   | -0.750188888 | 0.825909379  | 9.137967431 |
| ABLIM2:CCDS47012.1   | -0.74709521  | 3.447974014  | 9.134748256 |

## TAUvsControls

|                     |              |              |             |
|---------------------|--------------|--------------|-------------|
| EFNB1:CCDS14391.1   | 0.606808696  | 6.033818378  | 9.132871572 |
| ZNF668:CCDS54003.1  | -0.569453468 | 3.574490586  | 9.130475567 |
| TBX2:CCDS11627.2    | -1.060285344 | 3.783744731  | 9.128692078 |
| DBNDD2:CCDS42881.1  | -0.739018381 | 3.392283872  | 9.128576128 |
| RLBP1:CCDS32324.1   | -0.825179318 | 0.640323275  | 9.127646098 |
| SYNRG:CCDS11321.1   | 0.466866161  | 5.306071108  | 9.126635728 |
| MBD3L3:CCDS45944.1  | -0.864037574 | -0.528884587 | 9.125818188 |
| SF3B1:CCDS46479.1   | 0.683003385  | 3.829167016  | 9.125037003 |
| GPR64:CCDS55376.1   | -0.80788375  | 2.903653019  | 9.124708049 |
| TM2D3:CCDS10392.1   | -0.590937348 | 4.444965472  | 9.120334208 |
| DDRGK1:CCDS13050.1  | 0.4618431    | 5.69276506   | 9.118208116 |
| ESR2:CCDS32096.1    | -0.646044412 | 1.093569255  | 9.108016111 |
| PDE9A:CCDS42941.1   | -0.535518439 | 4.886406276  | 9.10778504  |
| CHAT:CCDS44389.1    | -0.756787526 | 1.729821289  | 9.107173208 |
| RCAN2:CCDS43469.1   | -0.742294228 | 3.528471073  | 9.102656137 |
| IQSEC2:CCDS48130.1  | -0.717228814 | 4.513061041  | 9.101578125 |
| VCAN:CCDS4060.1     | 0.674633701  | 7.771699685  | 9.100863796 |
| NOXO1:CCDS10454.1   | -0.854610715 | 1.204552395  | 9.100074715 |
| NEIL3:CCDS3828.1    | -0.64264076  | 1.621444616  | 9.098075776 |
| SLC24A4:CCDS45155.2 | -0.646631969 | 1.506441864  | 9.089272158 |
| THSD1:CCDS9433.1    | -0.674567429 | 2.342010314  | 9.085792577 |
| TNFRSF18:CCDS10.1   | -0.782409798 | 0.079147057  | 9.084660583 |
| NXPH4:CCDS8933.1    | -0.809062789 | 3.775433059  | 9.07808379  |
| GRM7:CCDS43042.1    | -1.292531341 | 2.848688634  | 9.07301295  |
| KCNK7:CCDS31608.1   | -0.729562237 | 0.966031498  | 9.072887263 |
| VPS35:CCDS10721.1   | 0.548137683  | 5.979137251  | 9.067895528 |
| FBXO25:CCDS5953.1   | -0.498720138 | 3.552855412  | 9.058849653 |
| IMMT:CCDS46356.1    | 0.428972338  | 6.270601018  | 9.057846755 |
| BOLA3:CCDS33225.1   | -0.729051656 | 3.038340681  | 9.055872713 |
| MEMO1:CCDS1776.1    | -0.531578247 | 3.639374085  | 9.053236745 |
| EML6:CCDS46286.1    | -0.873325635 | 3.312068793  | 9.053044712 |
| IMMT:CCDS46355.1    | 0.428808588  | 6.271036124  | 9.052393093 |
| MICAL3:CCDS46661.1  | -0.46591587  | 5.044487019  | 9.052207521 |
| CRHBP:CCDS4034.1    | -0.924788936 | 1.569338551  | 9.050292899 |
| EPB41L2:CCDS56450.1 | 0.623316271  | 5.188478288  | 9.049226917 |
| SIRPG:CCDS13021.2   | -0.920328657 | -0.321959415 | 9.04900425  |
| KCNAB3:CCDS11124.1  | -0.60703382  | 1.374792036  | 9.047573742 |
| MYLK3:CCDS10723.2   | -0.709558132 | 1.551657127  | 9.047144234 |
| PIK3CD:CCDS104.1    | -0.602571882 | 3.53207115   | 9.046926254 |
| RGL3:CCDS32910.1    | -0.661640963 | 1.705450951  | 9.045257631 |
| ICAM4:CCDS32904.1   | -0.825209512 | -0.189249233 | 9.043642566 |
| NPM1:CCDS4376.1     | 0.586389669  | 8.774505644  | 9.043364553 |
| HIP1:CCDS34669.1    | 0.541404007  | 5.954109933  | 9.040968326 |
| SCN1A:CCDS54414.1   | -0.634673464 | 2.907894199  | 9.039536508 |
| STRN3:CCDS41938.1   | 0.555407766  | 4.09626208   | 9.035253347 |
| HEY1:CCDS43749.1    | -0.795765123 | 3.292416114  | 9.033576327 |
| ZNF513:CCDS56114.1  | -0.485174685 | 3.63851125   | 9.033048008 |
| CLDN15:CCDS5717.1   | -0.651687264 | 1.913338466  | 9.032547766 |
| ALOX5AP:CCDS9337.1  | -0.933101996 | 0.111727152  | 9.030789051 |
| ALDH1A2:CCDS10163.1 | -1.347340658 | 2.948163397  | 9.030200352 |
| BCAT1:CCDS53762.1   | 0.817262022  | 3.907034753  | 9.025757771 |

## TAUvsControls

|                      |              |              |             |
|----------------------|--------------|--------------|-------------|
| MUTYH:CCDS41322.1    | 0.437361336  | 4.267761616  | 9.025289127 |
| LAGE3:CCDS14753.1    | -0.707673546 | 3.988707314  | 9.022578621 |
| LARS:CCDS34265.1     | 0.49694934   | 6.504818047  | 9.020100333 |
| FGFBP1:CCDS3418.1    | -1.035140884 | 0.602523768  | 9.019898503 |
| POPDC3:CCDS5052.1    | -0.818466482 | 0.653876078  | 9.019721289 |
| TTLL10:CCDS8.1       | -0.672436694 | 0.938319942  | 9.018158281 |
| MUTYH:CCDS41321.1    | 0.437258962  | 4.269128678  | 9.000702213 |
| YAF2:CCDS53779.1     | -0.612975906 | 3.143278658  | 8.997154138 |
| HEY1:CCDS6225.1      | -0.797017422 | 3.287691311  | 8.99637129  |
| TPD52L1:CCDS34528.1  | -0.874120002 | 2.714661561  | 8.996254734 |
| RFPL2:CCDS43009.2    | -1.044185387 | 1.209048999  | 8.988336154 |
| AQP1:CCDS55098.1     | -0.90041001  | 1.211327875  | 8.986712547 |
| NIN:CCDS32078.2      | 0.530512098  | 4.841498599  | 8.977433893 |
| DPF3:CCDS45133.1     | -0.677307926 | 2.231801905  | 8.971035662 |
| PGPEP1L:CCDS53977.1  | -0.797757729 | -0.092968786 | 8.969868495 |
| OPRM1:CCDS55071.1    | -0.848526835 | 0.409973407  | 8.969375901 |
| TNFRSF4:CCDS11.1     | -0.854003047 | -0.225632992 | 8.968092519 |
| RPS23:CCDS47241.1    | 0.710796687  | 9.590849316  | 8.967483626 |
| RAB26:CCDS10460.1    | -1.070344687 | 1.505322805  | 8.967099476 |
| ECE2:CCDS43179.1     | -0.649083776 | 2.007620962  | 8.964160529 |
| MRAP2:CCDS5001.1     | -0.740921817 | 0.17032339   | 8.961802409 |
| MRAS:CCDS3100.1      | -0.625836159 | 3.670963332  | 8.95352539  |
| KCNIP4:CCDS47035.1   | -1.308491013 | 1.035571347  | 8.952647697 |
| KCNC1:CCDS44547.1    | -0.562592419 | 2.856194013  | 8.950558265 |
| OR5I1:CCDS7949.1     | -1.217407729 | -0.177224634 | 8.950382755 |
| TCF7L2:CCDS7576.1    | 0.640766418  | 4.669567549  | 8.948663018 |
| HIST1H4C:CCDS4583.1  | 1.38021806   | 0.818489787  | 8.94577703  |
| SUPT3H:CCDS34466.1   | 0.535608283  | 3.320458974  | 8.943163642 |
| HS3ST1:CCDS3408.1    | -0.912833022 | 2.317866741  | 8.94162385  |
| EPOR:CCDS12260.1     | -0.534718914 | 2.678592514  | 8.94120577  |
| JUND:CCDS32959.1     | -0.659537008 | 7.051119121  | 8.94088259  |
| ROPN1:CCDS3026.1     | -0.932013645 | -0.365711498 | 8.940666957 |
| GTF3C3:CCDS56153.1   | 0.502851959  | 3.597630411  | 8.936178347 |
| MT1X:CCDS10768.1     | -0.983790438 | 1.796175509  | 8.933093129 |
| SIGLEC10:CCDS12832.1 | -0.588130516 | 1.485807692  | 8.932685122 |
| RFPL2:CCDS46694.1    | -0.999946105 | 0.793931971  | 8.930887447 |
| PARP8:CCDS54849.1    | -0.475407618 | 3.624433433  | 8.930543481 |
| APOPT1:CCDS9983.2    | -0.505368085 | 4.217746575  | 8.929362615 |
| MBD3L1:CCDS12209.1   | -1.319614984 | -0.490275771 | 8.924786876 |
| SNN:CCDS10549.1      | -0.732860786 | 4.384507578  | 8.924155447 |
| TNFRSF18:CCDS30552.1 | -0.788629277 | 0.011149356  | 8.919797438 |
| NOP10:CCDS10037.1    | -0.79877408  | 5.497743386  | 8.913262989 |
| CAMKK2:CCDS9217.1    | -0.544590358 | 4.564520469  | 8.903363493 |
| SCRT2:CCDS13006.1    | -0.791006641 | 2.647808211  | 8.892450177 |
| ARHGAP19:CCDS7454.2  | 0.584781462  | 2.971669613  | 8.892062021 |
| ANLN:CCDS5447.1      | 0.597090149  | 3.983852186  | 8.890864884 |
| ADRA1A:CCDS6054.1    | -0.875293457 | 0.954258624  | 8.885065663 |
| MBD3L4:CCDS54205.1   | -0.867344742 | -0.559866192 | 8.881954535 |
| TAF1:CCDS35325.1     | 0.519700773  | 5.495535897  | 8.877870049 |
| HSBP1:CCDS45534.1    | -0.69131927  | 6.795694572  | 8.874248146 |
| SPAG9:CCDS45740.1    | 0.491277685  | 6.550914641  | 8.873671526 |



## TAUvsControls

|                       |              |              |             |
|-----------------------|--------------|--------------|-------------|
| DKKL1:CCDS12762.1     | 0.790852381  | 2.560466553  | 8.868565904 |
| SLC29A2:CCDS8137.1    | -0.567186884 | 3.251291568  | 8.86611025  |
| CRB3:CCDS12166.1      | -0.989604217 | -0.482263352 | 8.865340027 |
| CDH10:CCDS3892.1      | -0.484002385 | 3.124376474  | 8.864721145 |
| DUSP13:CCDS53542.1    | -0.836315694 | 0.28384012   | 8.862838972 |
| SOX6:CCDS7821.1       | -0.51514202  | 2.695140912  | 8.860395627 |
| ST6GALNAC6:CCDS6882.1 | -0.5925689   | 4.91243072   | 8.858088639 |
| MYL2:CCDS31901.1      | -0.977506986 | -0.653027345 | 8.857285415 |
| SCN1A:CCDS33316.1     | -0.630753758 | 2.914918692  | 8.856338361 |
| KCNK7:CCDS8106.1      | -0.943129622 | 0.814167406  | 8.854340246 |
| SETD4:CCDS42923.1     | -0.451015415 | 2.727103978  | 8.853254061 |
| IL34:CCDS10895.1      | -0.678441727 | 1.961455821  | 8.853217776 |
| KIF2C:CCDS512.1       | 0.843489284  | 5.074794429  | 8.852952109 |
| PSMD10:CCDS14537.1    | -0.626073154 | 4.403665992  | 8.850983304 |
| SPAG9:CCDS11577.1     | 0.494103313  | 6.503277221  | 8.850321626 |
| CCL23:CCDS11305.1     | -1.295040573 | -0.729866999 | 8.849563556 |
| ANO1:CCDS44663.1      | -0.781518543 | 3.244354548  | 8.847592392 |
| ALG9:CCDS53709.1      | 0.488323752  | 4.219743738  | 8.834544673 |
| TAF1:CCDS14412.1      | 0.515271096  | 5.508254176  | 8.827720627 |
| ALDH1A2:CCDS10164.1   | -1.324484479 | 2.82824647   | 8.826414089 |
| TMEFF2:CCDS2314.1     | -0.57329225  | 3.978606528  | 8.825030769 |
| CPNE4:CCDS3072.1      | -0.82873512  | 3.699424364  | 8.824611107 |
| BCL2L15:CCDS30809.1   | -0.934535981 | -0.458490929 | 8.823959199 |
| CSRP1:CCDS1413.1      | -1.205089573 | 3.883667427  | 8.822749495 |
| SCN1A:CCDS54413.1     | -0.631542743 | 2.924131233  | 8.819880201 |
| STRN3:CCDS9641.1      | 0.547312117  | 3.954469607  | 8.817886126 |
| PRDM8:CCDS43243.1     | -0.641853631 | 3.938343641  | 8.817689899 |
| SLC9B1:CCDS47119.1    | -0.49793272  | 2.40804288   | 8.810942213 |
| HSPD1:CCDS33357.1     | 0.550297274  | 7.349467567  | 8.810007712 |
| PCBP1:CCDS1898.1      | -0.633330131 | 8.046301307  | 8.809694273 |
| B3GAT2:CCDS4974.1     | -0.668148099 | 2.837570876  | 8.808034416 |
| UPK3A:CCDS14064.1     | -0.727194974 | 0.321881012  | 8.806410519 |
| CAMKK2:CCDS53837.1    | -0.54441879  | 4.514000422  | 8.805912009 |
| OPRL1:CCDS13556.1     | -0.711076741 | 2.381500856  | 8.803925146 |
| MDM4:CCDS55674.1      | 0.584799441  | 2.563211689  | 8.797449693 |
| UPK3BL:CCDS47675.1    | 0.945377222  | 5.933400063  | 8.796303711 |
| HNRNPA2B1:CCDS5397.1  | 0.644535975  | 8.130179758  | 8.793768147 |
| CXXC5:CCDS43370.1     | -0.680270949 | 5.89807906   | 8.792191497 |
| ACP5:CCDS12265.1      | -0.988159876 | 0.639354947  | 8.791759642 |
| NXPH2:CCDS46421.1     | -0.79037596  | 0.214280737  | 8.786674398 |
| COPA:CCDS1202.1       | 0.530425721  | 8.183959904  | 8.783295055 |
| COPA:CCDS41424.1      | 0.530385376  | 8.185064163  | 8.782665722 |
| PREPL:CCDS54353.1     | 0.551964646  | 5.564976277  | 8.781158018 |
| GLG1:CCDS45527.1      | 0.530789069  | 7.71374439   | 8.781014386 |
| BEX2:CCDS14505.1      | -0.677536579 | 4.226652005  | 8.776924316 |
| TMEM151B:CCDS47437.1  | -0.752901754 | 4.141754169  | 8.775910448 |
| KIAA1598:CCDS31293.1  | -0.741182604 | 4.549797915  | 8.773992895 |
| FOXL2:CCDS3105.1      | -1.07761991  | 0.043048477  | 8.769650555 |
| GLG1:CCDS32485.1      | 0.530445097  | 7.749342094  | 8.769306988 |
| TRIM6:CCDS31389.1     | -0.701225178 | 1.60474477   | 8.767817117 |
| MYO3B:CCDS46446.1     | -0.86982852  | 2.216480302  | 8.767711426 |

## TAUvsControls

|                          |              |              |             |
|--------------------------|--------------|--------------|-------------|
| MMEL1:CCDS30569.2        | -0.75029526  | 2.075434271  | 8.764558384 |
| JAKMIP1:CCDS47005.1      | -0.775104323 | 3.660018896  | 8.761762145 |
| FMNL3:CCDS44874.1        | 0.742386512  | 5.115331674  | 8.757819009 |
| HNF4G:CCDS6220.2         | -0.682022655 | 0.554436275  | 8.756343529 |
| LAMC2:CCDS44285.1        | -1.028461878 | 2.247546725  | 8.755748029 |
| FAM171A2:CCDS45701.1     | -0.647716371 | 6.74613579   | 8.755585106 |
| ZNF709:CCDS42504.1       | 0.573417073  | 2.417700882  | 8.754048064 |
| HEATR1:CCDS31066.1       | 0.508687224  | 4.856388006  | 8.75296587  |
| NFATC1:CCDS12015.1       | -0.625721086 | 3.3101178    | 8.75182748  |
| GRPR:CCDS14174.1         | -0.888529188 | 0.329572023  | 8.751375725 |
| GHDC:CCDS11422.1         | 0.5373985    | 2.49038818   | 8.750679862 |
| AHNAK:CCDS31584.1        | 1.133507551  | 7.848289542  | 8.75038164  |
| PPP1R16B:CCDS54462.1     | -0.606062169 | 2.294414287  | 8.748264779 |
| TMPRSS13:CCDS41721.1     | -1.13914692  | 1.325499759  | 8.746762781 |
| ESR2:CCDS55920.1         | -0.644983611 | 1.044495344  | 8.740984781 |
| TAGAP:CCDS5261.1         | -0.785952786 | 1.288455514  | 8.740619026 |
| KCNIP2:CCDS7524.1        | -0.745898881 | 2.586869072  | 8.740315891 |
| CSDC2:CCDS14019.1        | -0.635167214 | 2.802264308  | 8.734570964 |
| WNK3:CCDS35302.1         | 0.525280329  | 3.585007559  | 8.734462035 |
| MFHAS1:CCDS34844.1       | -0.569834849 | 4.089799633  | 8.733129154 |
| IQGAP1:CCDS10362.1       | 0.606205489  | 5.955107708  | 8.728883879 |
| ACSBG2:CCDS12159.1       | -0.621498275 | 1.133340569  | 8.727527238 |
| MYO3B:CCDS42773.1        | -0.890296431 | 2.264229215  | 8.726435194 |
| RLIM:CCDS14427.1         | 0.612847069  | 3.831428964  | 8.724230576 |
| TADA1:CCDS1255.1         | -0.773497396 | 4.248400448  | 8.723834219 |
| AGTR1:CCDS3137.1         | -0.90836305  | 0.522762721  | 8.719846582 |
| SLC6A6:CCDS46765.1       | -0.790846312 | 1.613412611  | 8.718266531 |
| RNF208:CCDS7037.2        | -0.721233653 | 2.984442141  | 8.717988987 |
| SQLE:CCDS47918.1         | 0.554097269  | 6.545901532  | 8.716953538 |
| IFLTD1:CCDS44849.1       | -0.748854292 | 0.952290055  | 8.714224473 |
| SERPINE2:CCDS46525.1     | -0.969665992 | 6.605306919  | 8.713484383 |
| ZADH2:CCDS12008.1        | -0.568785872 | 2.920683403  | 8.71299671  |
| CNGB1:CCDS42169.1        | -0.584099708 | 3.178326472  | 8.710941695 |
| RASL11A:CCDS9321.1       | -0.70735882  | 0.658901222  | 8.704032878 |
| ALG9:CCDS41714.1         | 0.484533092  | 4.224803773  | 8.703103745 |
| IRF6:CCDS55681.1         | -0.816141933 | 0.467335849  | 8.700055871 |
| CARD8:CCDS54288.1        | 0.621517706  | 2.639791587  | 8.699486527 |
| UBE2E1:CCDS56244.1       | -0.562113504 | 4.844223803  | 8.699348651 |
| HIST1H1C:CCDS4577.1      | -0.824033854 | 3.926877655  | 8.699174174 |
| DUSP6:CCDS9033.1         | -0.730957361 | 4.332327335  | 8.699120046 |
| CRB3:CCDS12167.1         | -0.986848972 | -0.567834075 | 8.699050267 |
| TACR3:CCDS3664.1         | -0.672294773 | 0.581093457  | 8.693426003 |
| ABCB1:CCDS5608.1         | -0.921054423 | 2.172890434  | 8.692574621 |
| SLC12A5:CCDS13391.1      | -0.752735182 | 4.512631957  | 8.687929271 |
| TUBA4A:CCDS2438.1        | -0.820160924 | 4.227156517  | 8.687141029 |
| SLC6A1:CCDS2603.1        | -0.885684117 | 3.89047799   | 8.681954834 |
| TRIM6-TRIM34:CCDS31388.1 | -0.691694115 | 2.366197133  | 8.681467602 |
| GHDC:CCDS45681.1         | 0.536820416  | 2.39642806   | 8.679730347 |
| TEC:CCDS3481.1           | -0.696215598 | 1.246653196  | 8.678227995 |
| MDM4:CCDS55675.1         | 0.797322458  | 0.890710285  | 8.675967154 |
| CNTD1:CCDS11440.1        | -0.714311026 | 0.069358508  | 8.675230184 |

## TAUvsControls

|                      |              |              |             |
|----------------------|--------------|--------------|-------------|
| SLC25A29:CCDS32156.1 | -0.647197888 | 4.068485307  | 8.674269148 |
| TXLNG:CCDS14178.1    | 0.53010869   | 3.351149364  | 8.669195324 |
| RAB27B:CCDS11958.1   | -0.799112637 | 0.107066244  | 8.66746776  |
| HOXD8:CCDS2268.1     | -0.850331126 | 1.075506887  | 8.660340818 |
| SEC16B:CCDS44281.1   | -0.663976122 | 2.72598879   | 8.655550076 |
| GLYATL1:CCDS55768.1  | -0.923651427 | 0.459545501  | 8.648698699 |
| FMNL3:CCDS41780.1    | 0.737967487  | 5.06492466   | 8.64565767  |
| IL1R1:CCDS2055.1     | -1.088998229 | 2.537714065  | 8.636233045 |
| SP8:CCDS5372.1       | -0.773673917 | 2.213244327  | 8.63137476  |
| PHF10:CCDS5309.2     | 0.525845212  | 4.790179266  | 8.62785347  |
| SOX6:CCDS53604.1     | -0.512213112 | 2.670718414  | 8.62772912  |
| FKBP5:CCDS54996.1    | 0.917013047  | 2.385601673  | 8.62641654  |
| JAKMIP1:CCDS3385.1   | -0.78077782  | 3.537715814  | 8.625474077 |
| METTL21D:CCDS9696.2  | -0.749743654 | 1.523026484  | 8.625225208 |
| SET:CCDS48037.1      | 0.552353606  | 7.536333125  | 8.613562455 |
| ITLN2:CCDS1212.1     | -0.754344771 | 0.466310896  | 8.613509362 |
| PHF10:CCDS5308.2     | 0.525472648  | 4.791538311  | 8.613007693 |
| NKX2-2:CCDS13145.1   | -1.385580866 | -0.243630164 | 8.612677231 |
| TRAPPC11:CCDS47166.1 | 0.527184777  | 4.828590552  | 8.612292867 |
| FAR2:CCDS8717.1      | -0.889562457 | 3.375673566  | 8.61059604  |
| CHN2:CCDS47566.1     | -0.674586597 | 3.35027113   | 8.602200807 |
| SERPINE2:CCDS2460.1  | -0.967093934 | 6.59240712   | 8.600782678 |
| REEP6:CCDS12070.1    | -0.624235341 | 3.191548908  | 8.599458323 |
| COX6B2:CCDS42630.1   | -0.866786117 | -0.465277723 | 8.596007165 |
| TMEM141:CCDS7007.1   | 0.835993699  | 4.909958016  | 8.594004675 |
| STEAP1:CCDS5614.1    | -1.07444609  | 0.764038023  | 8.592483279 |
| TMUB1:CCDS5920.1     | -0.620857249 | 4.217899122  | 8.589854758 |
| CLDN2:CCDS14524.1    | -0.975723928 | -0.237259834 | 8.589176384 |
| SERPINE2:CCDS46526.1 | -0.967656612 | 6.591645936  | 8.588032014 |
| CES1:CCDS32450.1     | -1.202323836 | 1.011280033  | 8.585428347 |
| KCNIP4:CCDS43216.1   | -1.22164293  | 1.31625541   | 8.580084348 |
| PRKCZ:CCDS37.1       | -0.724423073 | 5.934759637  | 8.578541649 |
| LLGL2:CCDS45776.1    | -0.931172179 | 1.397444854  | 8.574967597 |
| OLFM1:CCDS6986.1     | -0.745434099 | 6.750599029  | 8.572270442 |
| C1orf53:CCDS44290.1  | -0.764015526 | 1.306081966  | 8.569137078 |
| BCAT1:CCDS53761.1    | 0.77005088   | 4.139618905  | 8.56814745  |
| KIAA0825:CCDS4070.1  | -0.824689718 | 0.40177665   | 8.56805422  |
| BCAT1:CCDS44845.1    | 0.772217823  | 4.14286969   | 8.566748614 |
| YAP1:CCDS44716.1     | 0.614617424  | 5.180169977  | 8.566012938 |
| PDE9A:CCDS42945.1    | -0.518318712 | 4.879721494  | 8.565222234 |
| HMGCS1:CCDS34154.1   | 0.513441489  | 7.732834543  | 8.563971256 |
| SULT4A1:CCDS14051.1  | -0.642060646 | 4.186544946  | 8.563236514 |
| SH2D3A:CCDS12173.1   | -0.807655691 | 1.539121455  | 8.561803672 |
| GPR176:CCDS10051.1   | -0.888380332 | 2.556892633  | 8.561202155 |
| CES1:CCDS45488.1     | -1.198607646 | 1.008999491  | 8.559342383 |
| CES1:CCDS45489.1     | -1.198607646 | 1.008999491  | 8.559342383 |
| NRP1:CCDS7177.1      | 0.589992425  | 5.293546292  | 8.556466302 |
| CAMK2B:CCDS5489.1    | -0.712302025 | 5.272120929  | 8.553609976 |
| ADRA1A:CCDS6053.1    | -0.8680082   | 1.058211338  | 8.552937245 |
| ZNF714:CCDS54239.1   | 0.544810952  | 2.466570038  | 8.551239128 |
| GRHL2:CCDS34931.1    | -0.654203573 | 1.081920614  | 8.551063787 |

## TAUvsControls

|                       |              |              |             |
|-----------------------|--------------|--------------|-------------|
| UHRF1BP1:CCDS43455.1  | 0.479266071  | 4.362123509  | 8.546957103 |
| AGBL4:CCDS44137.1     | -0.651683288 | 1.243701125  | 8.545591953 |
| GPSM1:CCDS48055.1     | -0.596985748 | 6.176357407  | 8.544018685 |
| SON:CCDS13629.1       | 0.562363962  | 7.475683441  | 8.541974134 |
| GLYATL1:CCDS31556.1   | -0.907849126 | 1.053811832  | 8.539268743 |
| PHLDA2:CCDS7741.1     | -0.857128024 | 0.965299828  | 8.535675408 |
| C2CD2L:CCDS8413.1     | -0.544606778 | 4.924674658  | 8.535473983 |
| RUSC2:CCDS35008.1     | -0.513185583 | 7.013241268  | 8.533183411 |
| LMAN1L:CCDS10270.1    | -0.664767932 | 1.02034679   | 8.530694179 |
| C1QTNF1:CCDS11761.1   | -1.194557772 | 1.503711671  | 8.526017347 |
| IRF5:CCDS43645.1      | -0.727335713 | 1.148400016  | 8.521518604 |
| ASB2:CCDS55940.1      | -1.165007272 | 1.3021379    | 8.521440032 |
| FAM216A:CCDS31899.1   | -0.575889162 | 3.358633008  | 8.521330542 |
| BCAT1:CCDS53760.1     | 0.770600801  | 4.143184791  | 8.519414617 |
| PWWP2B:CCDS7667.2     | -0.514009784 | 3.114794452  | 8.518998718 |
| WRNIP1:CCDS4476.1     | -0.491796268 | 5.263685616  | 8.514427711 |
| SNX27:CCDS1001.1      | 0.604764905  | 3.921066346  | 8.513604259 |
| MAGEE1:CCDS14433.1    | -0.57295112  | 4.23009146   | 8.51158422  |
| ABCD2:CCDS8734.1      | -0.556268232 | 1.68334726   | 8.510823397 |
| LPPR2:CCDS12258.1     | -0.642683063 | 6.001389257  | 8.50769592  |
| KPNA6:CCDS352.1       | 0.585901681  | 5.037256403  | 8.502388681 |
| FOSL1:CCDS8121.1      | -0.726238423 | 1.081570743  | 8.500965448 |
| PARP8:CCDS3954.1      | -0.470161169 | 3.670903239  | 8.500529491 |
| ACTR3B:CCDS34782.1    | -0.545338747 | 4.050596612  | 8.500408784 |
| ACSF3:CCDS10974.1     | -0.779253063 | 4.239422831  | 8.499682377 |
| HOXC5:CCDS8872.1      | -1.349255044 | 1.533038482  | 8.497892771 |
| ASPHD1:CCDS10660.1    | -0.669930478 | 3.712720428  | 8.497402815 |
| INSRR:CCDS1160.1      | -0.841976995 | 2.727409894  | 8.496711768 |
| LECT2:CCDS4190.1      | -1.271321314 | -0.415584361 | 8.495855069 |
| RAB3A:CCDS12372.1     | -0.727900488 | 7.53023176   | 8.493729062 |
| EYA4:CCDS5166.1       | -0.68403547  | 2.284990305  | 8.493345737 |
| NIN:CCDS32079.1       | 0.529728878  | 5.182139765  | 8.490245435 |
| LCN12:CCDS7018.2      | -0.886365304 | 0.293457692  | 8.489346702 |
| KCNMB3:CCDS3225.1     | -0.763334946 | 0.212124371  | 8.484682455 |
| TAGLN:CCDS8381.1      | -1.100978852 | 7.035699795  | 8.482905828 |
| ZNF668:CCDS10701.1    | -0.555336425 | 3.461052469  | 8.481246231 |
| TRAPPC11:CCDS34112.1  | 0.522624299  | 4.838253211  | 8.481082098 |
| NR2E1:CCDS5063.1      | -1.019708194 | 2.519336222  | 8.475498065 |
| ADAM12:CCDS7653.1     | -0.787319165 | 4.055133987  | 8.475323334 |
| NUP205:CCDS34759.1    | 0.528551479  | 5.615716733  | 8.474974637 |
| FBXO25:CCDS5952.1     | -0.488385855 | 3.392836773  | 8.474559511 |
| SLC22A18AS:CCDS7739.1 | -0.812708814 | -0.411850939 | 8.474322574 |
| KCNIP2:CCDS7526.1     | -0.764231616 | 2.265895334  | 8.473220211 |
| ATP6V0C:CCDS10470.1   | -0.88204175  | 7.369500453  | 8.471276801 |
| CD1E:CCDS41422.1      | -1.225307389 | -0.34965912  | 8.459067397 |
| POLQ:CCDS33833.1      | -0.479484747 | 3.03938385   | 8.454867185 |
| CYP39A1:CCDS4916.1    | -0.778982702 | 1.018825641  | 8.448293314 |
| OR2Z1:CCDS32895.1     | -1.366944623 | 0.597146239  | 8.444619647 |
| MS4A6E:CCDS7984.1     | -1.011734809 | -0.893701684 | 8.438939514 |
| AFF1:CCDS54775.1      | 0.598183287  | 4.108588086  | 8.434578019 |
| CAMK2B:CCDS5487.1     | -0.695239161 | 5.44613366   | 8.433531355 |

## TAUvsControls

|                      |              |              |             |
|----------------------|--------------|--------------|-------------|
| WRNIP1:CCDS4475.1    | -0.485634721 | 5.294184523  | 8.433087879 |
| RNF20:CCDS35084.1    | 0.474601716  | 5.709455209  | 8.43220508  |
| SEC31A:CCDS54773.1   | 0.545876546  | 7.548255162  | 8.431492481 |
| KCNJ8:CCDS8692.1     | -0.536327386 | 1.753654895  | 8.430209717 |
| C4orf26:CCDS56334.1  | -0.787039864 | 0.162214781  | 8.428774846 |
| CECR6:CCDS54494.1    | -0.704582324 | 1.684742971  | 8.427995124 |
| GLG1:CCDS45526.1     | 0.523458051  | 7.727204362  | 8.427815355 |
| KREMEN2:CCDS10483.1  | -0.736736154 | 1.849583327  | 8.427599286 |
| SBF2:CCDS31427.1     | 0.554632534  | 5.498501206  | 8.426631739 |
| TCF7L2:CCDS53577.1   | 0.605598575  | 4.607713178  | 8.425347075 |
| BRSK1:CCDS12921.1    | -0.593881221 | 7.426183861  | 8.421949901 |
| FBXL22:CCDS10187.2   | -0.788379908 | 0.182719038  | 8.421907037 |
| ZNF655:CCDS5670.1    | 0.668067477  | 2.041316399  | 8.421621372 |
| USP30:CCDS9123.2     | -0.524701719 | 4.459135725  | 8.416386111 |
| ZNRF2:CCDS5426.1     | -0.714474915 | 0.365939756  | 8.414801383 |
| WDR63:CCDS702.1      | -0.589645252 | 1.86861976   | 8.413639066 |
| SEC31A:CCDS47088.1   | 0.546617232  | 7.561024711  | 8.412097179 |
| ZNF558:CCDS12208.1   | 0.632071393  | 1.866625894  | 8.406726388 |
| HOXD8:CCDS56148.1    | -0.831344201 | 1.065127466  | 8.402628971 |
| PDE9A:CCDS42944.1    | -0.530329798 | 4.748895186  | 8.397500977 |
| SIGLEC10:CCDS54304.1 | -0.59402448  | 1.302647801  | 8.397043833 |
| CAMK2B:CCDS5483.1    | -0.690283061 | 5.702555544  | 8.393445783 |
| ASB13:CCDS7070.1     | -0.586001436 | 3.097676309  | 8.391587195 |
| IRF2BPL:CCDS9854.1   | -0.56175751  | 6.072653065  | 8.384349625 |
| C12orf29:CCDS31866.1 | -0.544857322 | 2.511029933  | 8.383265467 |
| PROM1:CCDS54747.1    | 0.640667294  | 4.571293204  | 8.379910584 |
| SUPT3H:CCDS34465.1   | 0.516507376  | 3.355343418  | 8.379532191 |
| CD40LG:CCDS14659.1   | -1.208053334 | -0.303208869 | 8.379020893 |
| AHRR:CCDS56355.1     | -0.507407905 | 3.918514639  | 8.378257421 |
| PNN:CCDS9671.1       | 0.621057768  | 5.386771603  | 8.373960301 |
| TBX21:CCDS11514.1    | -0.860881704 | 0.691186587  | 8.372588469 |
| PSEN1:CCDS9812.1     | 0.458307425  | 4.36988906   | 8.372199766 |
| MDM4:CCDS1447.1      | 0.570507153  | 2.672094749  | 8.364653082 |
| SIGLEC10:CCDS54301.1 | -0.584658599 | 1.06293612   | 8.361754961 |
| TMEM217:CCDS4831.1   | -0.892861763 | 0.872860313  | 8.36122098  |
| FKBPL:CCDS4738.1     | -0.614542648 | 2.12421453   | 8.360439524 |
| KCNK9:CCDS6377.1     | -1.132848829 | 1.667091793  | 8.359884088 |
| RGL3:CCDS54221.1     | -0.642069831 | 1.737317524  | 8.358432053 |
| ASIP:CCDS13232.1     | 1.223721211  | 1.11217498   | 8.355341104 |
| NYAP1:CCDS5696.1     | -0.629440477 | 4.670878154  | 8.352768595 |
| HBA2:CCDS10398.1     | -0.90356504  | -0.674807169 | 8.350076705 |
| SEC31A:CCDS3596.1    | 0.543291976  | 7.568647749  | 8.347261909 |
| MRPL43:CCDS7504.1    | -0.658787742 | 5.956166588  | 8.347096215 |
| FGF8:CCDS7517.1      | -0.838580902 | 0.862770953  | 8.341931676 |
| NMI:CCDS2192.1       | -1.04183152  | 0.789340452  | 8.338776454 |
| MTPAP:CCDS7165.1     | 0.516427536  | 3.406469726  | 8.336013172 |
| RPL3L:CCDS10450.1    | -0.705984412 | 0.615027745  | 8.335626364 |
| TYR:CCDS8284.1       | -1.002420748 | 1.665944816  | 8.334331107 |
| SEC31A:CCDS43244.1   | 0.550275247  | 7.462124313  | 8.331816982 |
| GATA2:CCDS3049.1     | -1.090574321 | 1.781524059  | 8.330679178 |
| GTF2H2C:CCDS43325.1  | 0.476119021  | 3.78517422   | 8.32959954  |

## TAUvsControls

|                      |              |              |             |
|----------------------|--------------|--------------|-------------|
| ZNF70:CCDS13812.1    | 0.657039967  | 2.831748554  | 8.328227997 |
| SCHIP1:CCDS56294.1   | -0.506578851 | 5.827422343  | 8.32649096  |
| C9orf64:CCDS6666.2   | -0.817715262 | 0.168822527  | 8.323472781 |
| TMPRSS13:CCDS55788.1 | -1.113749071 | 1.216434811  | 8.322488379 |
| GRAMD3:CCDS54894.1   | -0.706722426 | 2.132758869  | 8.320571045 |
| MRPL32:CCDS5468.1    | -0.707957393 | 3.624779405  | 8.320507871 |
| MCHR1:CCDS14004.1    | -0.717594345 | 2.961607871  | 8.318138719 |
| C2CD4A:CCDS32258.1   | -1.082898106 | 0.093076018  | 8.317153944 |
| GJA9:CCDS432.1       | -0.745406216 | 0.61116367   | 8.314061418 |
| CDKAL1:CCDS4546.1    | 0.507596243  | 3.561844508  | 8.313792815 |
| SON:CCDS13631.1      | 0.560201498  | 7.306520061  | 8.312805849 |
| THSD1:CCDS9432.1     | -0.649501466 | 2.437671858  | 8.311539317 |
| CCDC125:CCDS4000.1   | -0.647204686 | 1.474787265  | 8.309734646 |
| CHST1:CCDS7913.1     | -0.750753021 | 3.376923634  | 8.30946678  |
| IFIT1B:CCDS31242.1   | -0.777793664 | 0.006633517  | 8.308011281 |
| PCM1:CCDS47812.1     | 0.580264641  | 6.382243161  | 8.306854663 |
| FCRLB:CCDS30927.1    | -0.762292617 | 0.868459344  | 8.306038761 |
| MYOM1:CCDS45824.1    | -0.659656712 | 3.206356772  | 8.305857384 |
| C1QTNF7:CCDS3414.1   | -1.162202891 | 0.2669387    | 8.302947634 |
| PSEN1:CCDS9813.1     | 0.455678869  | 4.363525005  | 8.296695733 |
| SVOPL:CCDS47721.1    | -0.889432832 | 1.077969758  | 8.294412449 |
| CARD16:CCDS41705.1   | -1.273387474 | -0.70952561  | 8.291308969 |
| IGIP:CCDS34244.1     | -1.387240684 | 2.185667487  | 8.288609202 |
| TPD52L1:CCDS5130.1   | -0.770687403 | 3.257908686  | 8.288419546 |
| NMU:CCDS3501.1       | 0.925079149  | 3.529610924  | 8.28612649  |
| TCF12:CCDS10160.1    | 0.691331057  | 6.133954927  | 8.286010406 |
| STK24:CCDS32001.1    | 0.461968806  | 6.144909935  | 8.285949852 |
| EGR3:CCDS6033.1      | -0.705187676 | 0.936224722  | 8.282585275 |
| UTP14C:CCDS31978.1   | 0.511556131  | 3.611948411  | 8.282301841 |
| WNK3:CCDS14357.1     | 0.511079898  | 3.618634221  | 8.278667577 |
| TNRC6B:CCDS54533.1   | 0.516736538  | 4.651051668  | 8.276071671 |
| HOXB5:CCDS11530.1    | -1.809511687 | 3.25224141   | 8.275196659 |
| GP6:CCDS42626.1      | -0.780553973 | 1.371671447  | 8.270384844 |
| KLHL15:CCDS35217.1   | 0.610218848  | 2.546996594  | 8.269632296 |
| ODC1:CCDS1672.1      | 0.865581981  | 8.81093037   | 8.269486222 |
| GAD1:CCDS2239.1      | -0.956659244 | 4.160759743  | 8.269405048 |
| CYS1:CCDS33145.1     | -1.096977495 | 0.042232189  | 8.265525437 |
| FMR1:CCDS55519.1     | 0.503957924  | 4.455807844  | 8.261262666 |
| PREPL:CCDS42676.1    | 0.517409253  | 5.583199318  | 8.260657644 |
| ITGA11:CCDS45291.1   | -1.107509444 | 6.166812099  | 8.258162654 |
| IRF5:CCDS5808.1      | -0.720489671 | 1.117307725  | 8.258137178 |
| SPSB1:CCDS102.1      | -0.664606218 | 2.178431938  | 8.256840004 |
| SEBOX:CCDS45634.1    | -0.882968455 | -0.185902524 | 8.255908089 |
| FAT1:CCDS47177.1     | 0.656619769  | 7.681007243  | 8.250224581 |
| ZNF512:CCDS1758.1    | 0.469707723  | 5.156338466  | 8.248959416 |
| SH2D1A:CCDS48162.1   | -1.358403625 | -0.323772424 | 8.247586185 |
| STX1A:CCDS55120.1    | -0.54815195  | 4.047428699  | 8.246591962 |
| ATOH1:CCDS3638.1     | 0.80775379   | 1.067960615  | 8.243950625 |
| AFF1:CCDS3616.1      | 0.596547615  | 4.118410091  | 8.242824278 |
| GRIN1:CCDS7031.1     | -0.85263785  | 4.465009598  | 8.242601723 |
| CELF5:CCDS12106.1    | -0.7028753   | 5.530569947  | 8.242063113 |

## TAUvsControls

|                       |              |              |             |
|-----------------------|--------------|--------------|-------------|
| AKAP5:CCDS9764.1      | -0.718485386 | 0.588232693  | 8.239780091 |
| CLLU10S:CCDS31871.1   | -1.295517559 | -1.046835315 | 8.234856433 |
| ACAP2:CCDS33924.1     | 0.532537919  | 3.600516076  | 8.232082656 |
| BCL6:CCDS46975.1      | -0.644595835 | 3.455129105  | 8.230999011 |
| C6orf25:CCDS4717.1    | -0.797953013 | -0.397154699 | 8.230042341 |
| BCAT1:CCDS53763.1     | 0.770785003  | 4.043507216  | 8.228963322 |
| MYBL1:CCDS55241.1     | -0.562488089 | 1.789358994  | 8.228554776 |
| CAMK2B:CCDS5488.1     | -0.695682435 | 5.403228867  | 8.228436761 |
| ADRA1A:CCDS6052.1     | -0.863503921 | 0.969837359  | 8.228179533 |
| GRIN1:CCDS43910.1     | -0.846087876 | 4.40760211   | 8.224748443 |
| FGGY:CCDS611.2        | 0.582374692  | 3.070349093  | 8.222654137 |
| SYNPO2L:CCDS44438.1   | -1.147599072 | 2.000869929  | 8.222196713 |
| EML4:CCDS46266.1      | 0.517681547  | 4.819194981  | 8.21881727  |
| GRIN1:CCDS7032.1      | -0.844780854 | 4.413413739  | 8.217998919 |
| COLEC10:CCDS6327.1    | -0.732029288 | 0.119027811  | 8.214826057 |
| EML4:CCDS1807.1       | 0.516274937  | 4.892503964  | 8.213186246 |
| POLR2F:CCDS13963.1    | -0.888665954 | 6.760138864  | 8.212674971 |
| STT3A:CCDS8458.1      | 0.613840609  | 7.115407306  | 8.211891809 |
| EPHA10:CCDS41305.1    | -0.624776315 | 3.002772653  | 8.210942948 |
| CALN1:CCDS47603.1     | -0.878011155 | 0.508199994  | 8.207323276 |
| IFLTD1:CCDS8704.1     | -0.730691098 | 0.928350289  | 8.205767537 |
| TM2D3:CCDS10393.1     | -0.55083147  | 4.538267955  | 8.200741888 |
| SMARCA1:CCDS48164.1   | 0.54859457   | 6.00618363   | 8.197935042 |
| STK24:CCDS9488.1      | 0.459662772  | 6.145752016  | 8.19757204  |
| SSTR1:CCDS9666.1      | -0.996834428 | 0.720447162  | 8.195881725 |
| TNRC6B:CCDS46713.1    | 0.517412408  | 4.581197865  | 8.195383128 |
| FGF8:CCDS7515.1       | -0.849769156 | 0.739896275  | 8.194580314 |
| CASKIN1:CCDS42103.1   | -0.678633183 | 5.364837829  | 8.190042836 |
| PMM1:CCDS14020.1      | 0.596038628  | 6.090804381  | 8.188922676 |
| PDE9A:CCDS33571.1     | -0.520893769 | 4.733026493  | 8.185509891 |
| CCDC25:CCDS6062.2     | 0.665702177  | 3.112517788  | 8.182235892 |
| NR4A3:CCDS6742.1      | -0.667527847 | 2.247516406  | 8.178953244 |
| CDC20:CCDS484.1       | 0.94373714   | 6.152868613  | 8.178281459 |
| ZDHC13:CCDS44551.1    | -0.486840266 | 3.242089089  | 8.177600662 |
| HYAL1:CCDS2816.1      | -0.609332186 | 0.603548409  | 8.176564175 |
| ABLIM2:CCDS47013.1    | -0.71055582  | 3.584905651  | 8.176104789 |
| KCNIP2:CCDS7523.1     | -0.711227249 | 2.654438814  | 8.170593627 |
| HIST1H3B:CCDS4573.1   | 1.514836013  | 0.477013604  | 8.170021229 |
| YPEL5:CCDS1771.1      | -0.557514816 | 3.170596504  | 8.16807051  |
| SLC35F3:CCDS1600.1    | -0.992764241 | 1.884875452  | 8.167809148 |
| SLC9A3R1:CCDS11705.1  | -0.742814347 | 4.668455993  | 8.164916052 |
| PROM1:CCDS54748.1     | 0.635759743  | 4.609576095  | 8.164364216 |
| DISC1:CCDS53484.1     | -0.621281372 | 2.029339286  | 8.163591376 |
| TTC9:CCDS45132.1      | -0.64134331  | 2.559868169  | 8.161912338 |
| CAMKV:CCDS33762.1     | -0.78710158  | 5.773056355  | 8.160967699 |
| FAM115C:CCDS34769.1   | -0.73777246  | 1.580685488  | 8.152350412 |
| HNRNPA2B1:CCDS43557.1 | 0.609200296  | 8.212337706  | 8.146684522 |
| FBXO25:CCDS5954.1     | -0.49089681  | 3.225166666  | 8.143855055 |
| MAP7D2:CCDS55386.1    | -0.937230435 | 3.283525419  | 8.141557844 |
| TRIM48:CCDS7947.2     | -1.252067766 | 0.092675147  | 8.141493277 |
| OR7A17:CCDS12319.1    | -0.983293437 | -0.618614885 | 8.140622978 |

## TAUvsControls

|                      |              |              |             |
|----------------------|--------------|--------------|-------------|
| RAET1E:CCDS5221.1    | -0.82810162  | 0.327971639  | 8.139588951 |
| C2orf82:CCDS2499.1   | -0.876746378 | -0.487353897 | 8.135170568 |
| ZNF490:CCDS12272.1   | 0.696748744  | 1.913247823  | 8.129088736 |
| SLC34A3:CCDS7038.1   | -0.768124778 | 1.105760256  | 8.125445802 |
| AES:CCDS12101.1      | -0.754113825 | 7.682970249  | 8.123700332 |
| PURG:CCDS6081.1      | -0.502388452 | 1.660233129  | 8.121096743 |
| TRPV4:CCDS9134.1     | -0.662349836 | 2.099603606  | 8.119329755 |
| GATM:CCDS10122.1     | -0.570657066 | 3.203714007  | 8.119096709 |
| AES:CCDS12102.1      | -0.758639609 | 7.718934124  | 8.115676783 |
| PRKAG2:CCDS47752.1   | -0.768898112 | 2.408663425  | 8.112631204 |
| ZBTB4:CCDS11107.1    | -0.483754968 | 4.491709464  | 8.111353095 |
| SET:CCDS6907.1       | 0.530128017  | 7.651264092  | 8.10928193  |
| LAMC2:CCDS1352.1     | -0.985663998 | 2.330152068  | 8.10603487  |
| PLCXD1:CCDS14103.1   | -0.531143703 | 5.042149253  | 8.10235503  |
| ERG:CCDS46649.1      | -0.880540357 | 1.737665585  | 8.100375414 |
| NPAS1:CCDS12694.1    | -0.556501706 | 2.09807666   | 8.093978471 |
| FAM19A5:CCDS46729.1  | -0.525592089 | 3.423003844  | 8.09302386  |
| BTN2A1:CCDS4613.1    | -0.558942415 | 3.884250156  | 8.092452888 |
| MYH3:CCDS11157.1     | -1.528450164 | 5.227515046  | 8.086256361 |
| ACTR2:CCDS46307.1    | 0.444066106  | 5.930460514  | 8.085556403 |
| SLC12A5:CCDS46610.1  | -0.700776024 | 4.586697367  | 8.084720738 |
| FBXL16:CCDS10421.1   | -0.664349938 | 4.552762588  | 8.080311258 |
| CELF5:CCDS54197.1    | -0.692947145 | 5.432165897  | 8.078963354 |
| SMARCA1:CCDS14612.1  | 0.543728122  | 6.031502059  | 8.078496333 |
| ECE2:CCDS46969.1     | -0.617564551 | 1.964574111  | 8.077887907 |
| PHACTR3:CCDS13481.1  | 0.809808397  | 3.577424658  | 8.077871534 |
| IQSEC2:CCDS35298.1   | -0.675056356 | 4.291428451  | 8.076862525 |
| ZRSR2:CCDS14172.1    | 0.559404877  | 3.69142834   | 8.076159863 |
| OSTN:CCDS3299.1      | -1.29181523  | -0.844481734 | 8.075069458 |
| DMKN:CCDS12463.1     | -0.707029871 | 3.136107714  | 8.075022586 |
| FAM124B:CCDS2461.1   | -0.815939517 | -0.293802823 | 8.073529493 |
| CBR1:CCDS13641.1     | -0.728054161 | 4.028538843  | 8.073259631 |
| METTL21D:CCDS41951.1 | -0.742104748 | 1.25008179   | 8.073056248 |
| LRTM2:CCDS31726.1    | -0.83407558  | 0.586397119  | 8.071036071 |
| EPB41L2:CCDS5141.1   | 0.588549068  | 5.341919359  | 8.065173902 |
| KCNH6:CCDS11638.1    | -0.98667245  | 2.30682047   | 8.064451409 |
| CTSB:CCDS5986.1      | -0.666357913 | 7.550574272  | 8.06325928  |
| TDRD7:CCDS6725.1     | -0.82797059  | 3.180060709  | 8.059487923 |
| C8orf59:CCDS55255.1  | -0.61124025  | 3.057270552  | 8.056886587 |
| ASL:CCDS5531.1       | 0.519423986  | 5.135303794  | 8.055729937 |
| TFDP2:CCDS54647.1    | 0.658598298  | 4.33137056   | 8.054534547 |
| S1PR5:CCDS12240.1    | -0.883326324 | 0.501909448  | 8.052450835 |
| LOXL1:CCDS10253.1    | -0.596428291 | 5.47409473   | 8.051964704 |
| PROM1:CCDS54746.1    | 0.639708703  | 4.637571108  | 8.045097322 |
| FURIN:CCDS10364.1    | -0.518563783 | 5.289161689  | 8.042950434 |
| SSH3:CCDS8157.1      | -0.595425117 | 2.442278866  | 8.041131221 |
| CALCOCO2:CCDS11538.1 | 0.550012706  | 4.370522164  | 8.041114133 |
| RTN2:CCDS46114.1     | -0.61445787  | 5.045398496  | 8.039351731 |
| NHSL1:CCDS55063.1    | 0.613562129  | 5.420846762  | 8.038014201 |
| PRKCZ:CCDS55563.1    | -0.711305751 | 5.94250128   | 8.037112356 |
| MRPS6:CCDS33548.1    | -0.491547395 | 4.695213136  | 8.036866852 |



## TAUvsControls

|                         |              |             |             |
|-------------------------|--------------|-------------|-------------|
| BTN2A1:CCDS56405.1      | -0.575503187 | 3.661089962 | 8.035670588 |
| SCHIP1:CCDS3186.1       | -0.475404086 | 5.831568219 | 8.03314674  |
| BID:CCDS13749.1         | -0.670074481 | 2.791513322 | 8.030791494 |
| ASPDH:CCDS46153.1       | -0.68125154  | 0.281097698 | 8.029939374 |
| ASL:CCDS47597.1         | 0.518320702  | 5.059337284 | 8.028501926 |
| SYNPO2L:CCDS7331.1      | -1.162287253 | 1.682864805 | 8.026339063 |
| MEMO1:CCDS46255.1       | -0.496798179 | 3.477992444 | 8.025370947 |
| GRIN1:CCDS55354.1       | -0.838973876 | 4.485247732 | 8.023911214 |
| IQCJ-SCHIP1:CCDS56289.1 | -0.471574457 | 5.84852659  | 8.022786987 |
| IL33:CCDS56563.1        | -1.190474496 | 0.266460399 | 8.022001738 |
| PDE9A:CCDS42946.1       | -0.509929291 | 4.796610093 | 8.020838111 |
| FAM159A:CCDS41336.1     | -1.015599452 | -0.21877929 | 8.019678965 |
| PREPL:CCDS42675.1       | 0.519110023  | 5.590801112 | 8.019242699 |
| TP53:CCDS11118.1        | 0.7848893    | 6.71106026  | 8.018591122 |
| NUP43:CCDS5218.1        | 0.518134704  | 3.181138108 | 8.017861942 |
| JAM2:CCDS42911.1        | 0.58251777   | 4.591110787 | 8.017521666 |
| CDSN:CCDS34389.1        | -0.738290158 | 0.721060237 | 8.01700695  |
| ALK:CCDS33172.1         | -0.735027607 | 4.386731247 | 8.015739044 |
| VWA2:CCDS7589.1         | -0.657153052 | 1.044216013 | 8.01454804  |
| IL33:CCDS6468.1         | -1.224598291 | 0.543011453 | 8.012624881 |
| CDH7:CCDS11993.1        | -0.732476906 | 3.13767357  | 8.01247501  |
| AP3M1:CCDS7342.1        | 0.448355791  | 4.336007458 | 8.0094573   |
| EPS8L2:CCDS31328.1      | -0.564854405 | 2.538072439 | 8.009229674 |
| CX3CL1:CCDS10779.1      | -0.621793978 | 3.041494869 | 8.007270815 |
| CALN1:CCDS5541.1        | -0.91422978  | 0.361432538 | 8.006446894 |
| OSBPL10:CCDS2651.1      | -0.617972433 | 2.989905873 | 8.003808537 |
| TALDO1:CCDS7712.1       | -0.472387586 | 7.210892495 | 8.003668549 |
| TEKT4:CCDS2005.1        | -0.63637433  | 0.759862428 | 8.003521844 |
| CAMK2B:CCDS5484.1       | -0.686490135 | 5.563460096 | 8.003351211 |
| C16orf11:CCDS45365.1    | -0.798996627 | 0.380698103 | 8.00329114  |
| VWC2L:CCDS46509.1       | -1.309170168 | 0.039835276 | 8.001857041 |
| CCDC169:CCDS45029.1     | -0.824537881 | 0.145045296 | 7.999529958 |
| SIGLEC10:CCDS54302.1    | -0.580236536 | 1.267504913 | 7.997398373 |
| PDCD4:CCDS7567.1        | 0.518824403  | 4.510006017 | 7.995483898 |
| NBL1:CCDS196.2          | -0.73010788  | 4.797917861 | 7.992978858 |
| PHF13:CCDS85.1          | -0.491678205 | 3.524353562 | 7.992962684 |
| GRIN1:CCDS55355.1       | -0.830969224 | 4.43437922  | 7.990808636 |
| PREPL:CCDS33190.1       | 0.512522304  | 5.684036773 | 7.9895336   |
| DEPDC7:CCDS41632.1      | -0.601311224 | 1.085433504 | 7.988119437 |
| BTG4:CCDS8346.1         | -0.941547816 | -0.47300443 | 7.988025984 |
| AHCY:CCDS54457.1        | 0.719070204  | 8.11452413  | 7.987696148 |
| BCL6:CCDS3289.1         | -0.643966519 | 3.576420593 | 7.986571517 |
| TRAF3IP2:CCDS5093.1     | -0.594059072 | 3.146594937 | 7.98528803  |
| MARCH2:CCDS12202.1      | 0.609406539  | 4.895764197 | 7.985131448 |
| PGBD3:CCDS7230.1        | -0.543128326 | 1.269808601 | 7.983656718 |
| EIF4E1B:CCDS47345.1     | -0.976984288 | 0.332231751 | 7.982878956 |
| STAT4:CCDS2310.1        | -0.605266507 | 1.978712521 | 7.981533551 |
| PLEKHF1:CCDS12417.1     | -0.740984291 | 0.843759698 | 7.981205555 |
| USH1G:CCDS32725.1       | -0.85996952  | 0.334269848 | 7.977033678 |
| MAP1LC3A:CCDS13238.1    | -1.090782339 | 4.409597423 | 7.975042849 |
| ARHGEF3:CCDS2878.1      | -0.586845001 | 3.279753132 | 7.973439753 |

## TAUvsControls

|                         |              |              |             |
|-------------------------|--------------|--------------|-------------|
| TROVE2:CCDS53451.1      | 0.616488879  | 3.279890792  | 7.972642384 |
| HTR3A:CCDS8366.2        | -0.939492076 | 1.505764792  | 7.970096126 |
| RAI14:CCDS54839.1       | 0.565154714  | 5.66124341   | 7.966022836 |
| BRCA2:CCDS9344.1        | -0.695858504 | 3.250331954  | 7.962330867 |
| STK39:CCDS42770.1       | 0.520118292  | 5.287164046  | 7.959845097 |
| WISP1:CCDS56555.1       | -0.866411341 | 0.043843579  | 7.959754711 |
| TRAF3IP2:CCDS55050.1    | -0.593010678 | 3.145554888  | 7.958982188 |
| C9orf50:CCDS35159.1     | -0.716198678 | 0.784018592  | 7.958961257 |
| RABGAP1L:CCDS1314.1     | 0.681307235  | 3.106020456  | 7.957204886 |
| PRRT1:CCDS4739.1        | -0.715921482 | 1.819809723  | 7.955392038 |
| HDAC8:CCDS55449.1       | -0.439179435 | 3.284818598  | 7.954372105 |
| TIPARP:CCDS3177.1       | -0.477842573 | 2.966608306  | 7.953054757 |
| TCF12:CCDS10159.1       | 0.679806357  | 6.054739888  | 7.949988816 |
| FBXL14:CCDS8509.1       | -0.547071935 | 4.050619994  | 7.944489228 |
| FGGY:CCDS44155.1        | 0.569228357  | 3.139519288  | 7.944309808 |
| SCHIP1:CCDS56292.1      | -0.475003779 | 5.826674058  | 7.941615623 |
| SOX6:CCDS53605.1        | -0.489362803 | 2.718036829  | 7.940321616 |
| PARP3:CCDS46839.1       | -0.486743412 | 2.660191657  | 7.937808817 |
| RAI14:CCDS54838.1       | 0.563589524  | 5.662186713  | 7.937724771 |
| PEPD:CCDS54245.1        | -0.627027084 | 6.085351982  | 7.934125143 |
| UBE2V1:CCDS33483.1      | 0.539954638  | 4.627799982  | 7.933358505 |
| KCNH6:CCDS11639.1       | -0.969476701 | 2.229086451  | 7.932387196 |
| DMKN:CCDS46053.1        | -0.749916801 | 2.752399366  | 7.928400831 |
| COL20A1:CCDS46628.1     | -0.562441919 | 2.482228825  | 7.925733132 |
| MAP1LC3A:CCDS13237.1    | -1.093346854 | 4.348078591  | 7.922959475 |
| PPFIA3:CCDS12758.1      | -0.580978278 | 6.419033814  | 7.918704474 |
| FBLIM1:CCDS30609.1      | -0.71395535  | 2.927435786  | 7.917006015 |
| IPO11:CCDS34167.1       | 0.542100629  | 3.909221586  | 7.916076804 |
| IQCJ-SCHIP1:CCDS56291.1 | -0.469613885 | 5.842260776  | 7.91439364  |
| NOX1:CCDS14474.1        | -0.983643389 | 1.537162994  | 7.914372793 |
| DYRK3:CCDS30999.1       | -0.610573905 | 2.459407699  | 7.912880747 |
| PGP:CCDS42104.1         | -0.76955563  | 3.458332846  | 7.910224417 |
| NAPSA:CCDS12794.1       | -0.685986131 | 0.673932379  | 7.908623568 |
| PLCD1:CCDS46793.1       | 0.714384636  | 6.905720583  | 7.901304142 |
| NEUROG1:CCDS4187.1      | -0.85183715  | 0.552470532  | 7.900402547 |
| CAMK2B:CCDS43573.1      | -0.688072975 | 5.516089409  | 7.896531317 |
| C1QTNF7:CCDS47025.1     | -1.132306455 | 0.502749767  | 7.896276464 |
| CDK3:CCDS11736.1        | 0.579373697  | 2.332982457  | 7.895583335 |
| CYP3A5:CCDS55134.1      | -0.94034333  | -0.448083641 | 7.895404019 |
| CAMK2B:CCDS5486.1       | -0.685112763 | 5.471006569  | 7.893487796 |
| TTC9B:CCDS12550.1       | -0.849754698 | 4.732447956  | 7.891359047 |
| STT3B:CCDS2650.1        | 0.537222726  | 5.409815617  | 7.88770098  |
| LRP1B:CCDS2182.1        | -0.522968315 | 4.558826796  | 7.88593356  |
| VIM:CCDS7120.1          | 0.610931641  | 12.03139039  | 7.883763453 |
| GH1:CCDS45760.1         | -0.872743679 | -0.102188796 | 7.878477374 |
| ARHGEF3:CCDS46855.1     | -0.586236174 | 3.268129339  | 7.876303751 |
| PIP5K1C:CCDS56074.1     | -0.532160386 | 5.981590923  | 7.876056741 |
| C16orf3:CCDS32518.1     | -2.032270783 | 3.88804793   | 7.874588398 |
| GOLGB1:CCDS3004.1       | 0.619670215  | 5.889904828  | 7.874230859 |
| NOS1AP:CCDS53421.1      | 0.766322205  | 3.816265514  | 7.873374338 |
| SKIV2L2:CCDS3967.1      | 0.480589258  | 5.212708904  | 7.869286403 |

## TAUvsControls

|                      |              |              |             |
|----------------------|--------------|--------------|-------------|
| MGAT4C:CCDS9030.1    | -0.653536305 | 0.948788302  | 7.869101755 |
| TSTD1:CCDS53400.1    | -0.992527085 | 0.906187067  | 7.86764702  |
| COMMMD2:CCDS3145.1   | -0.513306969 | 3.450819937  | 7.864965328 |
| DMKN:CCDS54252.1     | -0.759910851 | 3.033923977  | 7.864954315 |
| MC4R:CCDS11976.1     | -0.882429594 | 0.449288959  | 7.86400453  |
| GATA2:CCDS46903.1    | -1.05383462  | 1.729217855  | 7.859411172 |
| CAMK2B:CCDS5485.1    | -0.684990814 | 5.517025514  | 7.857239241 |
| CBY3:CCDS47354.1     | -0.854762029 | -0.38290205  | 7.856549319 |
| CHRN1:CCDS11106.1    | -0.634453552 | 2.540818291  | 7.855467874 |
| SLC16A5:CCDS11713.1  | -0.799178707 | 1.197479746  | 7.852976427 |
| EGF:CCDS54794.1      | -0.623558784 | 2.657701419  | 7.847374586 |
| WDR3:CCDS898.1       | 0.483379351  | 4.865336674  | 7.843360948 |
| KIF15:CCDS33744.1    | 0.708431677  | 4.102361166  | 7.840430099 |
| KRT222:CCDS11371.1   | -0.694478486 | 0.784048488  | 7.839536574 |
| AMDHD1:CCDS9057.1    | -1.107284182 | 0.712313486  | 7.837081374 |
| CFLAR:CCDS2337.1     | -0.57380202  | 1.860139688  | 7.836566731 |
| KLHL17:CCDS30550.1   | -0.488891685 | 3.488857246  | 7.830843788 |
| MLPH:CCDS42836.1     | -0.863282799 | 1.550539845  | 7.82977769  |
| UBE2V1:CCDS13426.1   | 0.538901295  | 4.472373256  | 7.828887484 |
| BTLA:CCDS43130.1     | -0.789514835 | -0.152936533 | 7.828696488 |
| SORBS3:CCDS47824.1   | 0.678511498  | 6.036392709  | 7.826590295 |
| AMPD3:CCDS41617.1    | -2.146678052 | 4.971845874  | 7.823957035 |
| RAI14:CCDS34142.1    | 0.560338835  | 5.666853122  | 7.82323961  |
| GCHFR:CCDS10064.1    | 0.745748696  | 2.389007839  | 7.823067755 |
| DISC1:CCDS53485.1    | -0.605547933 | 1.912855814  | 7.822238868 |
| CDK5RAP2:CCDS43871.1 | 0.558977411  | 5.96827245   | 7.82195326  |
| TSTD1:CCDS44257.1    | -1.023168991 | 0.478951469  | 7.812131081 |
| CRHR2:CCDS5429.1     | -0.587239218 | 1.275989156  | 7.81147694  |
| DSCAML1:CCDS8384.1   | -0.720378739 | 4.185361403  | 7.811138266 |
| SCHIP1:CCDS56293.1   | -0.505988346 | 5.764754     | 7.80642087  |
| NHSL1:CCDS47487.1    | 0.592451223  | 5.473419448  | 7.80549266  |
| CLTC:CCDS32696.1     | 0.552868578  | 8.281814257  | 7.801748338 |
| PARP3:CCDS43097.1    | -0.486459526 | 2.639045568  | 7.800270016 |
| XDH:CCDS1775.1       | -1.033051871 | 2.319559804  | 7.79860245  |
| HPGD:CCDS3821.1      | -0.990874379 | 0.976780239  | 7.797798104 |
| DNAJB5:CCDS47960.2   | -0.501513725 | 5.126329237  | 7.794934468 |
| DHX36:CCDS54657.1    | 0.546731264  | 5.174895267  | 7.794477181 |
| DHX36:CCDS3171.1     | 0.54728429   | 5.18065321   | 7.794158263 |
| FZD8:CCDS7192.1      | -0.948831064 | 4.041940929  | 7.792122521 |
| CBL:CCDS8418.1       | 0.455573796  | 4.252030841  | 7.791587266 |
| SYNCRIP:CCDS5005.1   | 0.438441969  | 5.778627609  | 7.791424716 |
| SLC17A8:CCDS44957.1  | -0.915759823 | 1.428836     | 7.789684652 |
| FAHD1:CCDS32367.1    | -0.523867389 | 2.500228349  | 7.789519251 |
| SNX12:CCDS14405.1    | 0.503469645  | 3.849069359  | 7.786845961 |
| STX1A:CCDS34655.1    | -0.536546437 | 4.137682594  | 7.785860248 |
| PIP5K1C:CCDS32872.1  | -0.529278997 | 6.029259335  | 7.784753944 |
| FMR1:CCDS14682.1     | 0.492992657  | 4.492049603  | 7.783271129 |
| LGR4:CCDS31449.1     | 0.595466591  | 4.733353287  | 7.782984354 |
| GNL3L:CCDS14360.1    | 0.542383052  | 4.140403651  | 7.782955384 |
| SLAIN1:CCDS9460.1    | -0.503672927 | 4.378033329  | 7.782935348 |
| ABLIM2:CCDS47014.1   | -0.687059091 | 3.675107456  | 7.782377708 |

## TAUvsControls

|                     |              |              |             |
|---------------------|--------------|--------------|-------------|
| TRPV4:CCDS53828.1   | -0.668414785 | 2.024753953  | 7.776531727 |
| CDV3:CCDS3079.1     | 0.472559572  | 4.715527983  | 7.775643136 |
| B3GALT4:CCDS34425.1 | -0.574590235 | 1.387313789  | 7.775608336 |
| ASB2:CCDS9915.1     | -1.165976501 | 1.187043454  | 7.775184674 |
| MAP4K4:CCDS56130.1  | 0.492414088  | 7.63206775   | 7.77323642  |
| AMPD3:CCDS7802.1    | -2.148890385 | 5.069282031  | 7.771599056 |
| RASD1:CCDS11185.1   | -0.608330956 | 2.185078256  | 7.770868138 |
| MTR:CCDS1614.1      | 0.59128796   | 4.262210323  | 7.770594165 |
| RAG1:CCDS7902.1     | -0.711002378 | 1.421791567  | 7.767369778 |
| PDCD4:CCDS44478.1   | 0.512520906  | 4.501473231  | 7.765350904 |
| GNGT2:CCDS11545.1   | -1.439228166 | -0.687923996 | 7.76198053  |
| RAI14:CCDS54837.1   | 0.558154659  | 5.635105124  | 7.757949379 |
| FAM84A:CCDS1684.1   | -0.940507125 | 2.433462046  | 7.748893197 |
| ECE2:CCDS33899.1    | -0.632711886 | 1.884014978  | 7.748693174 |
| TPST2:CCDS13839.1   | -0.428931139 | 3.219316094  | 7.746282292 |
| RNFT2:CCDS9180.2    | 0.540447095  | 3.821865099  | 7.743517481 |
| AHCY:CCDS13233.1    | 0.703788911  | 8.187505515  | 7.735810888 |
| HPCAL1:CCDS1671.1   | -0.853751921 | 5.012070061  | 7.734960028 |
| HVCN1:CCDS31900.1   | -0.637316949 | 0.861201435  | 7.732748185 |
| PAR6G:CCDS12022.1   | -0.562304441 | 3.020782232  | 7.730426721 |
| IL4I1:CCDS12787.1   | -0.644633346 | 1.019127906  | 7.729887281 |
| RALBP1:CCDS11845.1  | 0.451048924  | 4.454492993  | 7.727188984 |
| PPM1M:CCDS46840.1   | 0.733652761  | 2.854184943  | 7.726026325 |
| VCAN:CCDS47242.1    | 0.591875739  | 6.166994071  | 7.724555012 |
| FGL2:CCDS5591.1     | -0.931636336 | 0.863624955  | 7.723544086 |
| DYNC1H1:CCDS9966.1  | 0.452874986  | 9.969980108  | 7.723393902 |
| AKAP13:CCDS32319.1  | 0.480949453  | 5.665599813  | 7.722476522 |
| WDR65:CCDS479.1     | -0.549787087 | 1.647170845  | 7.72177872  |
| MUTYH:CCDS41320.1   | 0.402027944  | 4.345838145  | 7.717479386 |
| ZC3H12A:CCDS417.1   | -0.566317236 | 1.729823661  | 7.717382495 |
| MYOM1:CCDS45823.1   | -0.636943719 | 3.141864489  | 7.71681022  |
| SPRN:CCDS53589.1    | -0.844942293 | -0.541113785 | 7.714032769 |
| HMGB2:CCDS3816.1    | 0.910321718  | 6.88517479   | 7.70912665  |
| RASGRF1:CCDS42065.1 | -0.921366654 | 3.550289043  | 7.708356468 |
| LYSMD2:CCDS45259.1  | -0.676449701 | 0.879638929  | 7.70676189  |
| TRIM6:CCDS31390.1   | -0.655538433 | 1.461950652  | 7.706592417 |
| ZNF577:CCDS12842.2  | 0.739850634  | 1.636091188  | 7.704711743 |
| KCNMB3:CCDS54683.1  | -0.753562389 | -0.137424249 | 7.703035995 |
| SORCS3:CCDS7558.1   | -0.490095784 | 3.370550937  | 7.702737917 |
| SNX6:CCDS9648.1     | 0.508521605  | 4.104636634  | 7.693665111 |
| CAV1:CCDS5767.1     | -0.723626719 | 1.775621911  | 7.693212981 |
| GCC1:CCDS5796.1     | 0.47879304   | 3.844469909  | 7.693010543 |
| ACSBG1:CCDS10298.1  | -0.722406033 | 2.46513706   | 7.690097046 |
| PDE11A:CCDS42785.1  | -0.595166764 | 1.832793419  | 7.68898767  |
| IGSF21:CCDS184.1    | -0.86668613  | 5.260434933  | 7.688456323 |
| C6orf25:CCDS34405.1 | -0.749615791 | -0.473625538 | 7.684049207 |
| CLCN1:CCDS5881.1    | -0.536345784 | 1.887135726  | 7.681774683 |
| DNAAF1:CCDS10943.2  | -0.531288957 | 1.499339346  | 7.680478641 |
| PSMD10:CCDS14536.1  | -0.566402047 | 4.643178228  | 7.680395025 |
| IQGAP3:CCDS1144.1   | 0.617965165  | 4.80940925   | 7.678122377 |
| HMP19:CCDS4391.1    | -0.762146267 | 6.590886448  | 7.676144608 |

## TAUvsControls

|                      |              |              |             |
|----------------------|--------------|--------------|-------------|
| MRPL43:CCDS7503.1    | -0.658354098 | 5.913034593  | 7.675756707 |
| AKAP13:CCDS32320.1   | 0.480565873  | 5.663206645  | 7.672867927 |
| SETD4:CCDS13640.1    | -0.409524232 | 2.935709072  | 7.672256427 |
| TP53I13:CCDS42289.1  | 0.567630666  | 4.531800914  | 7.67107356  |
| DARC:CCDS1183.1      | -0.704850543 | 1.565217836  | 7.670090264 |
| NMB:CCDS10332.1      | -0.658993079 | 2.432497241  | 7.666892268 |
| ARSE:CCDS14122.1     | -0.728751625 | 1.381564408  | 7.666313747 |
| UGGT1:CCDS2154.1     | 0.446799985  | 5.715771244  | 7.65481461  |
| DISC1:CCDS53482.1    | -0.54840019  | 2.616578037  | 7.654401183 |
| RFPL2:CCDS54521.1    | -0.935233881 | 0.711429338  | 7.65043081  |
| AMPD3:CCDS44537.1    | -2.123317668 | 5.072014471  | 7.650332071 |
| SPINK4:CCDS6536.1    | -1.555179444 | -0.865423342 | 7.650154789 |
| RXRG:CCDS1248.1      | -0.795262985 | 3.51242544   | 7.645810018 |
| GABRQ:CCDS14707.1    | -0.912955321 | 1.326679236  | 7.64274645  |
| PIKFYVE:CCDS2382.1   | 0.553918671  | 4.93988277   | 7.642448977 |
| TMEM71:CCDS6366.1    | -0.736578926 | 0.384796975  | 7.636551579 |
| DSN1:CCDS46596.1     | 0.685960276  | 2.378555013  | 7.630643087 |
| BNIP1:CCDS978.2      | -0.807948293 | 0.332037751  | 7.629892043 |
| RHOA:CCDS2795.1      | 0.527490711  | 7.403753657  | 7.626788463 |
| DDA1:CCDS12357.1     | -0.664078273 | 5.299989158  | 7.622993075 |
| TMEM132A:CCDS7997.1  | -0.604606157 | 7.656364383  | 7.621246098 |
| CDHR3:CCDS47684.1    | -0.674366986 | 2.377274063  | 7.619976187 |
| TCF12:CCDS42042.1    | 0.703601577  | 5.895236249  | 7.619642001 |
| MAMLD1:CCDS55526.1   | -0.485993347 | 3.914532561  | 7.61935017  |
| KIAA1683:CCDS32958.1 | -0.562228536 | 1.850550876  | 7.619235829 |
| DNAJB5:CCDS47959.1   | -0.501385986 | 5.093339872  | 7.615753969 |
| ASL:CCDS47598.1      | 0.509829173  | 5.06540419   | 7.614366502 |
| TMEM132A:CCDS44618.1 | -0.604119992 | 7.655982144  | 7.611013546 |
| SLC5A10:CCDS11201.2  | -0.969855467 | 1.885744677  | 7.61086548  |
| SND1:CCDS34747.1     | 0.560508183  | 8.359877076  | 7.609372287 |
| HPGD:CCDS54821.1     | -0.931691648 | 0.696469411  | 7.608912454 |
| PLA1A:CCDS56269.1    | -0.675577946 | 0.241636291  | 7.6074165   |
| PRKCZ:CCDS41229.1    | -0.709282205 | 5.755851077  | 7.605776638 |
| NOS1AP:CCDS1237.1    | 0.752801135  | 3.82113863   | 7.601709972 |
| VPS41:CCDS5458.2     | 0.512008036  | 5.240836497  | 7.600685146 |
| OSMR:CCDS3928.1      | -0.97627645  | 2.984833368  | 7.598679301 |
| KISS1R:CCDS12049.1   | -0.658507545 | 0.910909455  | 7.598576861 |
| SIGLEC10:CCDS54303.1 | -0.552407245 | 1.390819093  | 7.598214142 |
| MARCH11:CCDS47192.1  | -0.947174735 | 1.300193241  | 7.597975905 |
| LDOC1L:CCDS33662.1   | -0.510152214 | 3.885591041  | 7.596486233 |
| FBP2:CCDS6711.1      | -0.751188494 | 1.416444778  | 7.586300482 |
| ASIC2:CCDS11276.1    | -1.015810686 | 2.487645624  | 7.586136161 |
| MOB1B:CCDS34002.1    | 0.559052449  | 1.813601612  | 7.582698473 |
| NBL1:CCDS41278.1     | -0.702826134 | 4.854675993  | 7.581475189 |
| MAP7D2:CCDS14195.1   | -0.907205735 | 3.23577038   | 7.580037266 |
| DNAJB6:CCDS47755.1   | -0.481462562 | 5.429635481  | 7.579997696 |
| SEC31A:CCDS3597.1    | 0.517134802  | 7.488183228  | 7.579342217 |
| NBEAL1:CCDS46495.1   | -0.586418743 | 3.44855564   | 7.578342501 |
| GATSL2:CCDS47616.1   | -0.618974667 | 6.958153068  | 7.576817541 |
| SLC35D2:CCDS6717.1   | -0.574297284 | 2.703951775  | 7.576012886 |
| EFNB2:CCDS9507.1     | -0.576857586 | 4.698365225  | 7.573617061 |

## TAUvsControls

|                      |              |              |             |
|----------------------|--------------|--------------|-------------|
| CPQ:CCDS6273.1       | -0.643421781 | 1.310920748  | 7.572703378 |
| KCNMB3:CCDS43172.1   | -0.781202472 | 0.233106757  | 7.572096737 |
| NPM1:CCDS4377.1      | 0.551522373  | 8.571482231  | 7.568780988 |
| GDF15:CCDS12376.1    | -0.990472257 | 5.764491726  | 7.565928483 |
| CHRM5:CCDS10031.1    | -0.892516928 | 0.860079409  | 7.557552793 |
| XKR7:CCDS33459.1     | -0.58356285  | 2.99873342   | 7.556133008 |
| ADAMTS14:CCDS7306.1  | -0.84169425  | 2.62377184   | 7.552969393 |
| ADAMTS14:CCDS7307.1  | -0.84114381  | 2.626262526  | 7.54784537  |
| SLC5A10:CCDS42275.1  | -0.971280418 | 1.863178006  | 7.546134532 |
| CD58:CCDS44199.1     | -0.861222391 | 0.86775435   | 7.545879025 |
| SLAIN1:CCDS55901.1   | -0.531591792 | 3.874419497  | 7.545675209 |
| SLC13A3:CCDS54470.1  | -0.48850851  | 1.914844158  | 7.545107595 |
| EMILIN3:CCDS13316.1  | 0.622421004  | 3.591288214  | 7.544942864 |
| UBE2E1:CCDS2638.1    | -0.50770753  | 4.986135378  | 7.54403087  |
| SPINK7:CCDS4289.1    | -1.278917895 | -0.444181786 | 7.543907214 |
| ADPRHL1:CCDS9536.1   | -0.724165978 | 1.327120992  | 7.54345938  |
| CXCL13:CCDS3582.1    | -1.243413495 | -0.984986328 | 7.542253005 |
| CHCHD3:CCDS5828.1    | 0.453783258  | 5.237846628  | 7.537769215 |
| MRPL43:CCDS7502.1    | -0.652430125 | 5.90602422   | 7.536836326 |
| LCN15:CCDS7006.1     | -0.796315551 | -0.267206545 | 7.535236619 |
| TROVE2:CCDS41450.2   | 0.589248249  | 3.308533315  | 7.532946459 |
| PHLDA1:CCDS31861.1   | -0.515851752 | 4.467392173  | 7.532440798 |
| TNFRSF14:CCDS44046.1 | -0.677637293 | 0.822090249  | 7.529265598 |
| GRM5:CCDS44694.1     | -0.978947417 | 3.017207272  | 7.527822796 |
| MTMR12:CCDS34138.1   | 0.471217408  | 3.839212605  | 7.523861681 |
| RAB8B:CCDS10183.1    | 0.483089101  | 3.25888791   | 7.523755337 |
| SF3B3:CCDS10894.1    | 0.462634543  | 7.634501946  | 7.52310558  |
| CDK5R2:CCDS2427.1    | -0.795704412 | 3.250708412  | 7.519688597 |
| ARHGAP4:CCDS14736.1  | 1.260190244  | 4.68982202   | 7.519585408 |
| S100A6:CCDS1040.1    | -0.975032642 | 1.623227862  | 7.515971865 |
| NID1:CCDS1608.1      | 0.790694108  | 6.627255906  | 7.514376966 |
| MCCC2:CCDS34184.1    | 0.45250989   | 3.8813826    | 7.51322967  |
| CCDC65:CCDS8772.1    | -0.939773819 | 2.594340936  | 7.511048015 |
| KIAA1715:CCDS33332.1 | 0.579572047  | 3.859570041  | 7.506023009 |
| MUTYH:CCDS520.1      | 0.395369669  | 4.351815897  | 7.504996463 |
| CD53:CCDS829.1       | -0.692341851 | 0.312035633  | 7.502905666 |
| RAPGEFL1:CCDS11363.1 | -0.641926627 | 3.413243339  | 7.499725379 |
| TUBGCP5:CCDS10008.1  | 0.539328523  | 3.820642852  | 7.499112535 |
| CYP2S1:CCDS12573.1   | -0.747484731 | 1.396474608  | 7.499013714 |
| PTMS:CCDS8560.1      | 0.830571249  | 8.81261364   | 7.49369184  |
| HPDL:CCDS519.1       | -0.652476407 | 0.062604083  | 7.490360084 |
| TOP2A:CCDS45672.1    | 0.836131015  | 6.64285706   | 7.489628861 |
| SLC1A3:CCDS3919.1    | -0.880311134 | 5.73265275   | 7.489621604 |
| CACNG5:CCDS11665.1   | -1.121437931 | 2.005707884  | 7.487262311 |
| FGF8:CCDS7516.1      | -0.788572496 | 0.927612994  | 7.487082824 |
| PDE11A:CCDS33334.1   | -0.620536215 | 2.105509885  | 7.487045588 |
| FIGF:CCDS14166.1     | -0.637076244 | 0.559397127  | 7.485923664 |
| C1QTNF3:CCDS34141.1  | -0.713168498 | 1.566880016  | 7.485830395 |
| GH1:CCDS11653.1      | -0.843688073 | -0.065952115 | 7.48516665  |
| PROM1:CCDS47029.1    | 0.616701622  | 4.666098549  | 7.48131019  |
| C4B:CCDS47405.1      | -0.8254179   | 6.60133636   | 7.478398589 |

## TAUvsControls

|                      |              |              |             |
|----------------------|--------------|--------------|-------------|
| RASAL3:CCDS46006.1   | -0.661646813 | 1.643774153  | 7.478000003 |
| CFLAR:CCDS56158.1    | -0.630534994 | 1.533317687  | 7.474836052 |
| NMB:CCDS42076.1      | -0.670981686 | 2.551421716  | 7.473510674 |
| MCOLN1:CCDS12180.1   | -0.503851816 | 4.611498692  | 7.471491519 |
| GNA14:CCDS6657.1     | -0.748880148 | 0.582263212  | 7.47146333  |
| CCDC110:CCDS3843.1   | -0.700127166 | 1.267543309  | 7.470666267 |
| RASGEF1B:CCDS34022.1 | -0.59698256  | 3.488512505  | 7.470470928 |
| HSD11B1L:CCDS12145.1 | -0.605615207 | 3.89045004   | 7.469361584 |
| ESR2:CCDS55919.1     | -0.600395652 | 0.959432635  | 7.468829225 |
| SLC17A8:CCDS9077.1   | -0.912363106 | 1.532483464  | 7.468062263 |
| HTATIP2:CCDS44553.1  | -0.858408888 | 0.472777755  | 7.466612783 |
| NMD3:CCDS3194.1      | 0.580231938  | 4.205262916  | 7.462224516 |
| TROVE2:CCDS41449.1   | 0.590876645  | 3.288347084  | 7.46167669  |
| PATL2:CCDS45253.1    | -0.636052917 | 1.312782949  | 7.459854437 |
| METAP1D:CCDS2246.1   | -0.528696353 | 1.889955384  | 7.456226414 |
| SAMD14:CCDS11560.1   | -0.917570416 | 5.396122377  | 7.453438522 |
| TNNI3K:CCDS664.1     | -0.733197267 | 2.017499024  | 7.45334507  |
| GRM5:CCDS8283.1      | -0.975130284 | 2.958576579  | 7.451541649 |
| NRN1:CCDS4495.1      | -0.921233847 | 3.485526842  | 7.44920784  |
| ALS2CL:CCDS2743.1    | -0.700922337 | 1.964894684  | 7.444756839 |
| ASCC3:CCDS5047.1     | 0.658784063  | 0.798320502  | 7.44179659  |
| SLC22A23:CCDS47363.1 | -0.509365527 | 4.41929047   | 7.441562336 |
| DARC:CCDS44252.1     | -0.694902884 | 1.413033593  | 7.439575326 |
| WASF2:CCDS304.1      | 0.60930144   | 5.444429775  | 7.438654644 |
| CRYAB:CCDS8351.1     | -1.193409421 | 6.597487545  | 7.435688685 |
| TIMELESS:CCDS8918.1  | 0.706730112  | 6.075098604  | 7.434571195 |
| ARNTL2:CCDS8712.1    | -0.542911633 | 2.22389291   | 7.42921677  |
| MTNR1B:CCDS8290.1    | -0.761493153 | -0.116812502 | 7.427604402 |
| DDX42:CCDS32704.1    | 0.475341429  | 6.200107576  | 7.427505945 |
| TMEM87A:CCDS32205.1  | 0.501823299  | 4.806766073  | 7.421610877 |
| ARL5C:CCDS45664.1    | -0.855562807 | -0.531313754 | 7.420084984 |
| GSK3A:CCDS12599.1    | -0.561487703 | 7.018038841  | 7.41833724  |
| NCCRP1:CCDS12529.1   | -0.822742598 | 0.469720653  | 7.415676313 |
| TUBGCP5:CCDS45188.1  | 0.531425157  | 3.805661939  | 7.406440775 |
| FAM150B:CCDS46218.1  | -0.850306496 | -0.032070032 | 7.404782109 |
| PHYH:CCDS41489.1     | 0.477791086  | 3.90494701   | 7.398687146 |
| CCNB3:CCDS14332.1    | -0.562846168 | 0.374392634  | 7.397755238 |
| PEPD:CCDS42544.1     | -0.61820098  | 6.221414981  | 7.397249368 |
| FAM71C:CCDS9072.1    | -1.018087239 | -0.578500115 | 7.396547362 |
| C2orf15:CCDS2038.1   | -0.8016937   | -0.544549716 | 7.395307543 |
| RWDD2B:CCDS13582.1   | 0.614921025  | 2.280573789  | 7.39385551  |
| ACTL6B:CCDS5702.1    | -0.684001284 | 6.379351901  | 7.392394581 |
| PLCD1:CCDS2671.1     | 0.701264771  | 6.902070924  | 7.392078562 |
| CHD2:CCDS10374.2     | 0.490415818  | 6.068881681  | 7.391883325 |
| STARD3:CCDS54117.1   | -0.468955005 | 5.912443931  | 7.390859863 |
| TMEM176B:CCDS5908.1  | -0.702884208 | 1.827733093  | 7.388829981 |
| MR1:CCDS53442.1      | -0.760165995 | 0.624034149  | 7.388725561 |
| NEUROG2:CCDS3698.1   | -0.818652819 | 2.726057134  | 7.387951412 |
| TRIM25:CCDS11591.1   | -0.657037705 | 2.879109506  | 7.386522456 |
| DNAJC10:CCDS33345.1  | 0.62569728   | 5.011282481  | 7.37961784  |
| GFI1:CCDS30773.1     | -0.634602268 | 0.325255331  | 7.376657529 |

## TAUvsControls

|                      |              |             |             |
|----------------------|--------------|-------------|-------------|
| CRB1:CCDS1390.1      | -0.729703056 | 3.983130118 | 7.376459573 |
| LPHN3:CCDS54768.1    | 0.474449523  | 5.723025893 | 7.376105594 |
| FBLIM1:CCDS163.1     | -0.668156898 | 3.224007044 | 7.375574706 |
| NDUFV3:CCDS33572.1   | 0.53648277   | 5.254723671 | 7.37527333  |
| CYP3A5:CCDS5672.1    | -0.848763406 | 0.996644882 | 7.374775226 |
| PRICKLE3:CCDS14320.1 | -1.021941944 | 1.432008798 | 7.373690808 |
| TMPRSS13:CCDS55789.1 | -1.139663067 | 0.848746648 | 7.373430308 |
| STARD3:CCDS54118.1   | -0.475026007 | 5.810215018 | 7.372808194 |
| NFKBID:CCDS42552.1   | -0.663362449 | 0.640403241 | 7.371377664 |
| KCNK6:CCDS12513.1    | -0.633724927 | 0.307070851 | 7.370011247 |
| CHRNA:CCDS33400.1    | -1.37147512  | 1.32585169  | 7.369422539 |
| CHD8:CCDS45081.1     | 0.436977195  | 6.692456476 | 7.367736192 |
| ZNF804A:CCDS2291.1   | -0.571999623 | 2.933843472 | 7.365720449 |
| IARS:CCDS6694.1      | 0.501687665  | 7.467732923 | 7.363850034 |
| ALDH16A1:CCDS12766.1 | 0.513796918  | 4.318257279 | 7.36250802  |
| BTN2A1:CCDS56404.1   | -0.53923924  | 3.242272307 | 7.35949063  |
| GALNT3:CCDS2226.1    | -0.683692501 | 0.89562633  | 7.357272341 |
| RASGRF1:CCDS10309.1  | -0.828460318 | 4.786984045 | 7.349715247 |
| MMP28:CCDS45651.1    | -0.815154422 | 0.046368304 | 7.349435139 |
| STARD3:CCDS11341.1   | -0.466505997 | 5.91516126  | 7.349172059 |
| DDO:CCDS5082.1       | -0.681875454 | 0.176619267 | 7.345187027 |
| LGI3:CCDS6025.1      | -0.777196796 | 2.522823303 | 7.345012753 |
| CLEC11A:CCDS12800.1  | -0.619933474 | 2.396427851 | 7.342179922 |
| KIAA1683:CCDS46018.1 | -0.572365361 | 1.784898645 | 7.341853419 |
| CREB3L2:CCDS34760.1  | 0.612682265  | 3.613699076 | 7.340747232 |
| GPATCH8:CCDS32666.1  | 0.447107603  | 5.327933954 | 7.33988126  |
| SMYD3:CCDS53486.1    | -0.505802501 | 4.16379356  | 7.338772149 |
| PYGM:CCDS8079.1      | -0.594400763 | 2.948985391 | 7.338058941 |
| AMPD3:CCDS53601.1    | -2.162771756 | 4.726923156 | 7.33463903  |
| PLXND1:CCDS33854.1   | -0.684371052 | 6.078146644 | 7.332924724 |
| CDS1:CCDS3608.1      | -0.651608066 | 2.155491177 | 7.332493114 |
| SCN1B:CCDS46047.1    | -0.830484861 | 0.670718057 | 7.331196073 |
| DTX3L:CCDS3015.1     | -0.632260545 | 1.5795553   | 7.329254718 |
| SNX2:CCDS34217.1     | 0.605966105  | 5.103349544 | 7.328308737 |
| TPD52L1:CCDS43502.1  | -0.734225929 | 3.119893534 | 7.324874584 |
| SLC24A2:CCDS55297.1  | -0.707936815 | 1.668478526 | 7.322242411 |
| CDH13:CCDS56010.1    | -1.087848848 | 2.058456545 | 7.321494888 |
| CCDC147:CCDS31282.1  | -0.593240285 | 1.56356373  | 7.320526952 |
| SLC39A4:CCDS43782.1  | -0.583772347 | 1.199331622 | 7.317795235 |
| GSR:CCDS56530.1      | -0.433903497 | 4.997613436 | 7.316200463 |
| ZNF675:CCDS32981.1   | -0.482116753 | 2.385271361 | 7.315664319 |
| ZPLD1:CCDS2947.1     | -0.622311126 | 0.857109599 | 7.311737783 |
| SNRNP200:CCDS2020.1  | 0.558662849  | 9.09849186  | 7.310524442 |
| MMP19:CCDS8895.1     | -0.787636796 | 1.098217844 | 7.30950544  |
| ALX1:CCDS9028.1      | 0.941217469  | 2.006540655 | 7.306988591 |
| VCAN:CCDS54875.1     | 0.561421063  | 6.748288385 | 7.306106966 |
| PAFAH1B2:CCDS53715.1 | 0.658694596  | 4.315394992 | 7.304329811 |
| C1QTNF3:CCDS3904.1   | -0.698182588 | 1.404792099 | 7.303397331 |
| PDPR:CCDS45520.1     | 0.468278879  | 4.726835314 | 7.300820144 |
| CDH13:CCDS56009.1    | -1.08545401  | 2.059420393 | 7.300029483 |
| HOXB3:CCDS11528.1    | -1.091568574 | 3.442822458 | 7.299923722 |



## TAUvsControls

|                      |              |             |             |
|----------------------|--------------|-------------|-------------|
| COLQ:CCDS33709.1     | -0.590725195 | 2.070951265 | 7.298186241 |
| VPS41:CCDS5457.1     | 0.500039476  | 5.291555954 | 7.297499867 |
| PAFAH1B2:CCDS53714.1 | 0.673558335  | 4.459856019 | 7.297205247 |
| GUCY2D:CCDS11127.1   | -1.05478042  | 1.928704391 | 7.294051272 |
| ARL17A:CCDS45718.1   | 0.62971742   | 2.000551507 | 7.293624357 |
| MAP7D2:CCDS55384.1   | -0.899033196 | 3.182270229 | 7.289922187 |
| CHRNA4:CCDS13517.1   | -0.569235248 | 4.011964916 | 7.286754371 |
| FXYD5:CCDS12447.1    | -1.098457885 | 3.983795078 | 7.285722274 |
| DLGAP1:CCDS11836.1   | -0.585548988 | 4.078714631 | 7.283036997 |
| DMKN:CCDS54250.1     | -0.682616087 | 3.320443979 | 7.281059426 |
| CARD10:CCDS13948.1   | -0.667902439 | 3.537679896 | 7.277642831 |
| PPP1R1A:CCDS44912.1  | 0.787456206  | 5.67676801  | 7.277348577 |
| TNIK:CCDS54677.1     | 0.778229936  | 6.106592346 | 7.27480714  |
| BAIAP2L1:CCDS34687.1 | -0.779074875 | 3.286520166 | 7.271501963 |
| C22orf43:CCDS42985.1 | -0.742600106 | 0.641694524 | 7.269954645 |
| ZDHC13:CCDS44550.1   | -0.441903319 | 3.514344318 | 7.269012754 |
| ALDH16A1:CCDS46141.1 | 0.517493784  | 4.260652383 | 7.268995353 |
| ELOVL5:CCDS56433.1   | 0.541078313  | 5.535869813 | 7.264377353 |
| KIRREL3:CCDS55796.1  | -0.695017283 | 4.568973064 | 7.263613639 |
| DOCK7:CCDS30734.1    | 0.43597381   | 5.677880103 | 7.26337768  |
| C15orf52:CCDS10055.2 | -0.835006071 | 1.234532506 | 7.257440091 |
| PEPD:CCDS54244.1     | -0.59911217  | 5.983440631 | 7.255377083 |
| TNIK:CCDS54679.1     | 0.769386778  | 6.145560247 | 7.254365616 |
| CD58:CCDS888.1       | -0.852527703 | 0.935420697 | 7.25084308  |
| SERPINB9:CCDS4478.1  | -0.710460743 | 1.487638024 | 7.250152796 |
| CREB3L3:CCDS12121.1  | -0.641483006 | 1.214141274 | 7.24749869  |
| OMG:CCDS11265.1      | -0.690874456 | 0.386964514 | 7.246724693 |
| MAP3K5:CCDS5179.1    | -0.822544193 | 2.682908922 | 7.245145822 |
| KPNB1:CCDS11513.1    | 0.443639026  | 7.506173391 | 7.24255319  |
| TNIK:CCDS54673.1     | 0.777040966  | 6.078659474 | 7.238402459 |
| EFCAB6:CCDS14049.1   | -0.448690452 | 2.635663613 | 7.237910174 |
| NT5C1A:CCDS440.1     | -0.702153809 | 0.412130003 | 7.237863917 |
| DIRAS2:CCDS6687.1    | -0.741114573 | 2.678854365 | 7.237811463 |
| CAMK2G:CCDS7338.1    | -0.455394562 | 5.482336097 | 7.233359355 |
| RBM26:CCDS9462.1     | 0.484385082  | 4.927261759 | 7.22668557  |
| HPR:CCDS42193.1      | -0.666407801 | 0.478366812 | 7.226352124 |
| FBXO2:CCDS130.1      | -0.595749327 | 3.767958886 | 7.22204905  |
| PRKD1:CCDS9637.1     | -0.586174114 | 3.211749793 | 7.218018693 |
| TNIK:CCDS54675.1     | 0.768366908  | 6.118380065 | 7.217980331 |
| PRDM7:CCDS45557.1    | -2.268967949 | 7.139553472 | 7.215417735 |
| ZNF648:CCDS30952.1   | -0.646527006 | 0.496384721 | 7.214043537 |
| TNFSF13B:CCDS9509.1  | -0.932870573 | 0.154023887 | 7.213263658 |
| ELOVL5:CCDS4951.1    | 0.538674448  | 5.466182705 | 7.213179839 |
| ACTR2:CCDS1881.1     | 0.413083364  | 5.882693967 | 7.212896444 |
| SORBS3:CCDS6031.1    | 0.637594374  | 6.09158206  | 7.210592546 |
| ARHGEF3:CCDS46854.1  | -0.540804129 | 3.236540738 | 7.209911653 |
| CLSTN2:CCDS3112.1    | -0.46841109  | 4.741196641 | 7.209207164 |
| MED10:CCDS34134.1    | -0.582226265 | 4.500611043 | 7.202233807 |
| AQP5:CCDS8793.1      | -1.071529462 | 0.370296228 | 7.20163734  |
| CAMKK1:CCDS11038.1   | -0.578938821 | 3.274272201 | 7.200681451 |
| BMP8A:CCDS437.1      | 0.529465779  | 2.029023866 | 7.198816316 |

## TAUvsControls

|                      |              |              |             |
|----------------------|--------------|--------------|-------------|
| PHACTR3:CCDS13480.1  | 0.733622567  | 3.75736002   | 7.196525742 |
| CNTRL:CCDS35118.1    | 0.511506266  | 4.32538761   | 7.196029938 |
| ADRA2A:CCDS7569.2    | -0.8996867   | 1.886559997  | 7.194535609 |
| KIAA0319:CCDS54971.1 | -0.904279647 | 3.062919399  | 7.192670816 |
| RINL:CCDS12522.1     | -0.7375509   | 0.898705323  | 7.190303132 |
| PIKFYVE:CCDS33368.1  | 0.623399212  | 2.864955836  | 7.190174736 |
| ISLR2:CCDS10259.1    | -0.774274841 | 6.284421899  | 7.188266028 |
| ARHGAP22:CCDS7227.1  | -0.638829697 | 1.879103844  | 7.185514844 |
| UTP14A:CCDS14615.1   | 0.509322598  | 4.299303405  | 7.179133252 |
| DYRK3:CCDS31000.1    | -0.56738924  | 2.480082509  | 7.178828981 |
| WASF2:CCDS55582.1    | 0.628594315  | 4.888790683  | 7.178760761 |
| ZDHC4:CCDS5352.1     | 0.516238435  | 4.823781648  | 7.176270721 |
| GCNT1:CCDS6653.1     | -0.869866039 | 1.057179867  | 7.171540813 |
| KCNG1:CCDS13436.1    | -0.852402575 | 3.859631522  | 7.171155277 |
| SLC19A2:CCDS1280.1   | -0.499635768 | 2.311870523  | 7.169253162 |
| NUP214:CCDS6940.1    | 0.45216775   | 6.333004592  | 7.166678253 |
| RASGRF1:CCDS45320.1  | -0.815478536 | 4.758474608  | 7.164552141 |
| CHAT:CCDS7233.1      | -0.693870284 | 1.560645242  | 7.163186648 |
| WEE1:CCDS7800.1      | 0.455371517  | 4.366356426  | 7.160978143 |
| PHACTR3:CCDS42895.1  | 0.742035481  | 3.707839372  | 7.1554317   |
| GRTP1:CCDS9534.2     | -0.49486906  | 1.286933296  | 7.15223557  |
| GCH1:CCDS41954.1     | -0.728193748 | 0.682212807  | 7.150207021 |
| FAM115C:CCDS47735.2  | -0.681980205 | 1.788167943  | 7.149963595 |
| CUL7:CCDS4881.1      | 0.397750047  | 7.165224641  | 7.148843225 |
| FANCC:CCDS35071.1    | 0.494298391  | 3.600210662  | 7.145627329 |
| PRRC2C:CCDS1296.2    | 0.517359195  | 6.970134702  | 7.145037441 |
| RPUSD1:CCDS10426.1   | -0.585483628 | 4.112151952  | 7.142253453 |
| IQSEC3:CCDS31725.1   | -0.578340856 | 3.74354417   | 7.135106938 |
| NR0B2:CCDS291.1      | -0.829618579 | -0.622215405 | 7.129776794 |
| GTF2H1:CCDS7838.1    | -0.434922716 | 4.102454103  | 7.128878983 |
| SUPT16H:CCDS9569.1   | 0.548711329  | 7.130290515  | 7.12622205  |
| DICER1:CCDS9931.1    | 0.531528999  | 5.031180015  | 7.12622169  |
| CHD8:CCDS53885.1     | 0.429722558  | 6.817749972  | 7.124687157 |
| TRPV4:CCDS53829.1    | -0.625578997 | 2.081589204  | 7.123925867 |
| SPSB3:CCDS32365.1    | -0.617406371 | 5.790052476  | 7.123862293 |
| PHACTR3:CCDS56202.1  | 0.735773797  | 3.721849476  | 7.123335533 |
| TNFSF13B:CCDS45067.1 | -0.910147995 | -0.093689991 | 7.118655957 |
| C2orf54:CCDS42840.1  | -0.638414751 | 0.13750553   | 7.117436363 |
| SH2D1A:CCDS14608.1   | -1.248195236 | -0.305032123 | 7.114478582 |
| IL1RN:CCDS46396.1    | -0.750627234 | -0.319413567 | 7.108470317 |
| UBE2V1:CCDS13427.1   | 0.506656769  | 3.751824938  | 7.105610483 |
| TNRC6B:CCDS46712.1   | 0.504654727  | 4.03224184   | 7.105003976 |
| NOX1:CCDS14475.1     | -0.977198417 | 1.425755513  | 7.103733427 |
| IDI2:CCDS7055.1      | -0.625782142 | 1.168301424  | 7.102814278 |
| WNT10B:CCDS8775.1    | -0.988534764 | 2.107055644  | 7.10278752  |
| IL4I1:CCDS12786.1    | -0.610289259 | 1.06514324   | 7.096609581 |
| CGRRF1:CCDS9719.1    | -0.559055372 | 2.174307208  | 7.088412955 |
| SYNCRIP:CCDS55041.1  | 0.416589453  | 5.835343644  | 7.08644484  |
| RABGGTB:CCDS669.1    | 0.481495626  | 3.990925571  | 7.08535657  |
| PPL:CCDS10526.1      | -0.634202674 | 3.757986588  | 7.083093395 |
| NRP1:CCDS31179.1     | 0.529414293  | 4.723148295  | 7.08123778  |

## TAUvsControls

|                      |              |              |             |
|----------------------|--------------|--------------|-------------|
| CRISPLD1:CCDS6219.1  | 0.686780951  | 5.097192916  | 7.079520968 |
| SYS1:CCDS56192.1     | -0.643077688 | 3.055294675  | 7.079403057 |
| IPO11:CCDS47217.1    | 0.503808527  | 3.957287483  | 7.07377299  |
| ARHGAP4:CCDS55540.1  | 1.220241522  | 4.752341161  | 7.070589742 |
| WIPI2:CCDS47533.1    | -0.506055837 | 5.940550122  | 7.067924428 |
| RPLP1:CCDS10234.1    | 0.666972444  | 9.748305974  | 7.065831043 |
| CUL7:CCDS55003.1     | 0.395428709  | 7.181813988  | 7.056285564 |
| DNAH10:CCDS9255.2    | -0.419902269 | 4.377804142  | 7.05206248  |
| KAT6A:CCDS6124.1     | 0.518914652  | 5.9969278    | 7.051523388 |
| MCEE:CCDS1915.1      | -0.674515928 | 0.933877619  | 7.050476853 |
| TULP1:CCDS4807.1     | -0.975937751 | 2.297173689  | 7.050142154 |
| HUWE1:CCDS35301.1    | 0.462814796  | 8.55862443   | 7.047747324 |
| OSBPL10:CCDS54559.1  | -0.575366804 | 2.871167086  | 7.044022669 |
| PDE9A:CCDS42947.1    | -0.493592977 | 4.637704635  | 7.043746413 |
| FBXL15:CCDS31273.1   | -0.583498619 | 3.476700138  | 7.043607313 |
| ENKUR:CCDS7146.1     | -0.605618788 | 1.197161179  | 7.043004907 |
| KIAA1683:CCDS46017.1 | -0.550883987 | 2.043225053  | 7.042774135 |
| ANKRD53:CCDS1913.1   | -0.651269963 | 0.769936056  | 7.039424494 |
| VPS29:CCDS53832.1    | -0.629830811 | 4.549143702  | 7.039405432 |
| TMEM209:CCDS47712.1  | 0.585101053  | 3.908672248  | 7.034959383 |
| HSPA4:CCDS4166.1     | 0.46921531   | 6.538665364  | 7.031443927 |
| YES1:CCDS11824.1     | 0.573187088  | 4.258503871  | 7.029853817 |
| ADPRH:CCDS2990.1     | -0.717568891 | 0.170951818  | 7.029243236 |
| TMED3:CCDS10310.1    | 0.536435927  | 5.880195372  | 7.021964768 |
| NAT8L:CCDS3359.2     | -0.626334723 | 3.920662911  | 7.021651033 |
| ADAMTS16:CCDS43299.1 | -0.578983111 | 2.782621349  | 7.021402923 |
| KIF21B:CCDS30965.1   | -0.575152003 | 8.154205811  | 7.021015776 |
| HOXD8:CCDS56149.1    | -0.920850371 | 0.312670911  | 7.020916285 |
| IQSEC3:CCDS53728.1   | -0.563325068 | 4.111915643  | 7.019514544 |
| CDK5RAP2:CCDS6823.1  | 0.525287265  | 6.078032734  | 7.019333232 |
| RNFT2:CCDS44987.1    | 0.506611591  | 3.818314005  | 7.019169872 |
| LGALS9C:CCDS32587.1  | -0.708361295 | 0.779385803  | 7.015391682 |
| ESRRG:CCDS1517.1     | -0.56307614  | 2.768615309  | 7.015162421 |
| RNF24:CCDS13074.1    | 0.60313405   | 2.873715122  | 7.0151386   |
| HDAC8:CCDS55448.1    | -0.461331484 | 2.393304794  | 7.014113836 |
| ZNF720:CCDS45473.1   | 0.555627547  | 1.949740135  | 7.013674662 |
| MMD:CCDS11586.1      | -0.551416334 | 3.269744863  | 7.012503111 |
| PRND:CCDS13081.1     | -0.943281096 | -0.557541207 | 7.01155107  |
| TRPV4:CCDS9135.1     | -0.606867548 | 2.011326971  | 7.009957627 |
| NFATC1:CCDS12016.1   | -0.68841283  | 2.49194741   | 7.006811569 |
| RARRES3:CCDS41662.1  | -0.979249224 | 1.103254716  | 7.006338675 |
| HIST1H2BE:CCDS4588.1 | -0.637444407 | 0.323937193  | 7.004781385 |
| ESRRG:CCDS41468.1    | -0.538861579 | 2.968162455  | 7.003714057 |
| CHST13:CCDS3039.1    | -0.785779174 | -0.244301076 | 7.003092643 |
| PPP1R14A:CCDS12509.1 | -0.773877508 | 1.029791574  | 6.999694562 |
| HSD17B7:CCDS1242.1   | -0.559177911 | 3.913596323  | 6.998392549 |
| GAL3ST3:CCDS8128.1   | -0.601728629 | 2.751148851  | 6.998302882 |
| MICB:CCDS43449.1     | -0.705333634 | 1.550078347  | 6.997613708 |
| MAP7D2:CCDS55385.1   | -0.87447353  | 3.143006776  | 6.996238662 |
| EPB41L5:CCDS54392.1  | 0.515988146  | 3.434919874  | 6.996189065 |
| PKLR:CCDS44240.1     | -0.762387403 | 1.071664037  | 6.992384093 |

## TAUvsControls

|                       |              |             |             |
|-----------------------|--------------|-------------|-------------|
| MAP4:CCDS46818.1      | 0.450396369  | 7.915141951 | 6.990665281 |
| TMEM108:CCDS33858.1   | -0.633878539 | 3.784423751 | 6.988552445 |
| GSR:CCDS56531.1       | -0.431039698 | 5.204643451 | 6.987752527 |
| MBOAT7:CCDS54315.1    | -0.51322673  | 5.177856135 | 6.984806561 |
| FOX4L2:CCDS43817.1    | -0.687266795 | 0.233988475 | 6.983148194 |
| BCL2L13:CCDS13746.1   | 0.420355315  | 4.706928663 | 6.9804737   |
| TNIK:CCDS54678.1      | 0.756226031  | 6.129418717 | 6.975826767 |
| TTYH2:CCDS32717.1     | 0.609015014  | 4.783340505 | 6.97180508  |
| CHRN3:CCDS6134.1      | -1.222343903 | 1.67286018  | 6.97179115  |
| DNAJB5:CCDS35007.1    | -0.487039103 | 4.950906228 | 6.970766488 |
| SEC14L5:CCDS45403.1   | -0.841026434 | 1.523844938 | 6.970153539 |
| ANKRD34B:CCDS34194.1  | -1.013703303 | 0.747743093 | 6.968483758 |
| AFP:CCDS3556.1        | -1.339064201 | 1.895537222 | 6.966278663 |
| KHNYN:CCDS32058.1     | 0.480814971  | 4.184843728 | 6.965599246 |
| GPM6A:CCDS3824.1      | -0.59377961  | 7.021438036 | 6.964589561 |
| TNIK:CCDS46956.1      | 0.748155194  | 6.16778375  | 6.962374789 |
| LG14:CCDS12444.1      | -0.639143912 | 2.202273688 | 6.962139343 |
| BCLAF1:CCDS5177.1     | 0.502693705  | 5.75649972  | 6.956287118 |
| B3GNT1:CCDS8136.1     | -0.543037406 | 6.327946888 | 6.95493363  |
| VPS29:CCDS41832.1     | -0.618968787 | 4.308361633 | 6.949716039 |
| RGS20:CCDS6155.1      | -0.548838094 | 2.192082836 | 6.948493156 |
| CLEC18B:CCDS32484.1   | -0.659709564 | 2.597513788 | 6.945550408 |
| CAMK2G:CCDS7337.1     | -0.450566526 | 5.434943356 | 6.944869869 |
| SLC1A3:CCDS54844.1    | -0.835203412 | 5.478374786 | 6.944693216 |
| HSP90B1:CCDS9094.1    | 0.51463457   | 8.42574923  | 6.942111552 |
| PRKAG2:CCDS43683.1    | -0.71627931  | 2.609020427 | 6.938627851 |
| DNAJB13:CCDS8227.1    | -0.637004328 | 0.612102844 | 6.937586919 |
| TNIK:CCDS54674.1      | 0.75465943   | 6.101927787 | 6.934601586 |
| CCDC144NL:CCDS32591.1 | -0.843100403 | 0.934192971 | 6.932517045 |
| CYB5A:CCDS54188.1     | -0.554249163 | 3.425869939 | 6.931495586 |
| ANKRD17:CCDS34004.1   | 0.481224668  | 6.705221743 | 6.931447105 |
| NR1D1:CCDS11361.1     | -0.57206609  | 5.127495363 | 6.931175339 |
| WDR20:CCDS55945.1     | -0.427126277 | 3.406520543 | 6.930829345 |
| CFLAR:CCDS56157.1     | -0.532919243 | 1.721465425 | 6.930157096 |
| FAM166A:CCDS35186.1   | -0.577449159 | 0.619584222 | 6.927568526 |
| RUNDC3A:CCDS45698.1   | -0.68976945  | 6.718844433 | 6.926314878 |
| IL6:CCDS5375.1        | -0.907617107 | 0.517303388 | 6.925738819 |
| ZNF639:CCDS3227.1     | -0.501326404 | 3.122439339 | 6.922636424 |
| TNIK:CCDS54676.1      | 0.746775055  | 6.141022216 | 6.921535583 |
| COLQ:CCDS46768.1      | -0.575640948 | 2.087114556 | 6.920754273 |
| ACOT2:CCDS9816.1      | -0.736566489 | 2.342497296 | 6.920127867 |
| PTBP3:CCDS55332.1     | 0.598379832  | 3.415138347 | 6.918282202 |
| IL11RA:CCDS6567.1     | 0.843001994  | 5.146851114 | 6.917918572 |
| C20orf26:CCDS33447.1  | -0.414867095 | 2.523676022 | 6.91221058  |
| MYO3A:CCDS7148.1      | -0.47674959  | 2.602731068 | 6.908683399 |
| AGPAT9:CCDS3606.1     | -0.724495176 | 1.040643241 | 6.906849301 |
| FRAS1:CCDS54771.1     | 0.593695388  | 6.025403443 | 6.90479344  |
| TNNT1:CCDS46185.1     | -1.123823164 | 3.713715515 | 6.903928964 |
| PGC:CCDS4859.1        | -0.684428189 | 0.441086314 | 6.903036388 |
| CABP1:CCDS31913.1     | -0.654761901 | 1.612306494 | 6.90157184  |
| FAHD1:CCDS45380.1     | -0.52844344  | 2.451911306 | 6.899426816 |

## TAUvsControls

|                      |              |             |             |
|----------------------|--------------|-------------|-------------|
| VEPH1:CCDS3179.1     | -0.524088636 | 2.482427113 | 6.895686422 |
| TRPM8:CCDS33407.1    | -0.867341485 | 2.33049993  | 6.895058299 |
| SLC39A4:CCDS6424.1   | -0.576012161 | 1.249277423 | 6.894556169 |
| MITF:CCDS46865.1     | -0.577539505 | 2.078886681 | 6.894161363 |
| CC2D1A:CCDS42512.1   | -0.468002953 | 4.957531694 | 6.890779838 |
| GNG10:CCDS35107.1    | -0.73230843  | 2.029625763 | 6.888049436 |
| CAP2:CCDS4539.1      | -0.397227421 | 4.520939936 | 6.881677573 |
| PPAPDC2:CCDS34981.1  | -0.543961951 | 1.167165008 | 6.881559378 |
| FMR1:CCDS55518.1     | 0.456703722  | 4.367918758 | 6.879926705 |
| KIAA0895:CCDS56483.1 | -0.555269211 | 2.786762931 | 6.877963571 |
| BTN2A1:CCDS47390.1   | -0.538529646 | 3.325500987 | 6.876409066 |
| PIKFYVE:CCDS54431.1  | 0.594696889  | 3.132962816 | 6.871845956 |
| CLCN4:CCDS14137.1    | -0.600878999 | 4.770758416 | 6.871232262 |
| KCNA4:CCDS41629.1    | -0.983448013 | 1.630109021 | 6.871014282 |
| TRPM3:CCDS6637.1     | -0.625999706 | 2.608707574 | 6.869051415 |
| APOC1:CCDS12648.1    | 0.918691986  | 0.215816538 | 6.867921197 |
| KIAA0895:CCDS47573.1 | -0.560352147 | 2.772238392 | 6.864980193 |
| FUT9:CCDS5033.1      | -0.755430904 | 0.979369321 | 6.864671973 |
| MEAF6:CCDS418.1      | -0.493633585 | 5.666259437 | 6.864196934 |
| DMKN:CCDS46054.2     | -0.680346126 | 3.461552237 | 6.862723883 |
| NCOA4:CCDS7237.1     | 0.408952685  | 6.017797271 | 6.859510961 |
| FOXD4L4:CCDS6621.1   | -0.669927155 | 0.245227757 | 6.858271709 |
| PRKAG2:CCDS5928.1    | -0.697881309 | 2.68294244  | 6.858133302 |
| GRM8:CCDS47696.1     | -0.514795349 | 2.707337543 | 6.857542634 |
| KIAA1024:CCDS32306.1 | -0.644329119 | 2.539919569 | 6.856476597 |
| TRIM3:CCDS7764.1     | -0.453748038 | 4.504533482 | 6.85645411  |
| CD6:CCDS7999.1       | -0.72482725  | 1.531509702 | 6.855105159 |
| HYAL1:CCDS2817.1     | -0.571301821 | 0.403228211 | 6.85490535  |
| KCNV2:CCDS6447.1     | -0.783141444 | 1.443273276 | 6.852601796 |
| TNKS:CCDS5974.1      | 0.457339496  | 5.749215835 | 6.851354288 |
| SLC6A12:CCDS8501.1   | -0.673148142 | 1.423304957 | 6.851217715 |
| KCNK15:CCDS13337.1   | -0.793072976 | 0.250101223 | 6.849569615 |
| UCKL1:CCDS13547.1    | -0.476541757 | 5.115447106 | 6.848995001 |
| PRKAR1A:CCDS11678.1  | 0.399322102  | 6.745373466 | 6.848838897 |
| DPPA4:CCDS33814.1    | -0.599749236 | 1.495559912 | 6.844626369 |
| DOCK4:CCDS47688.1    | -0.46642766  | 4.574423036 | 6.844097956 |
| EPHA6:CCDS46876.1    | -0.602587983 | 2.44512618  | 6.841797014 |
| HNRNPH3:CCDS7279.1   | 0.567107511  | 6.532360346 | 6.840308915 |
| GRIA3:CCDS14604.1    | -0.923247373 | 2.858376284 | 6.836622146 |
| ERG:CCDS46648.1      | -0.808462775 | 2.057853964 | 6.834984224 |
| GLDN:CCDS10140.2     | -0.920475467 | 0.757530332 | 6.833894088 |
| NPAS2:CCDS2048.1     | -0.686322831 | 3.584556331 | 6.833711471 |
| DHODH:CCDS42192.1    | 0.518974436  | 3.090034589 | 6.833464268 |
| GEM:CCDS6261.1       | -0.561876964 | 2.163455908 | 6.828910294 |
| SSTR2:CCDS11691.1    | -0.623223565 | 2.553157894 | 6.826170758 |
| GSR:CCDS56532.1      | -0.419717089 | 5.0961799   | 6.824642371 |
| ANTXR1:CCDS46313.1   | 0.662808985  | 4.860268328 | 6.823722382 |
| PRR14:CCDS10687.1    | -0.571219049 | 5.649003878 | 6.822983015 |
| TMEM232:CCDS47253.2  | -0.610969009 | 1.386948837 | 6.81643201  |
| FAM69A:CCDS44173.1   | -0.644641037 | 2.149716027 | 6.815477521 |
| PGA5:CCDS8001.1      | -0.584775136 | 0.900475431 | 6.814328495 |

## TAUvsControls

|                      |              |              |             |
|----------------------|--------------|--------------|-------------|
| IQUB:CCDS5787.1      | -0.607785601 | 1.35766196   | 6.813892786 |
| KIF18A:CCDS7867.1    | -0.652878412 | 2.732469706  | 6.813254208 |
| RAB11B:CCDS12201.1   | -0.641203073 | 7.061839398  | 6.809633873 |
| TPX2:CCDS13190.1     | 0.643858507  | 5.636397277  | 6.808160262 |
| ANKRD17:CCDS34003.1  | 0.478572942  | 6.600340326  | 6.807484295 |
| HLA-A:CCDS34373.1    | -0.797512988 | 5.998849908  | 6.804517204 |
| CLUAP1:CCDS32381.1   | 0.420729414  | 3.93637295   | 6.804029622 |
| CCDC110:CCDS47170.1  | -0.657480156 | 1.163927858  | 6.797791422 |
| GHDC:CCDS45682.1     | 0.455815882  | 2.218385733  | 6.792319806 |
| WDR20:CCDS9970.1     | -0.42471635  | 3.347164032  | 6.788826107 |
| FAHD1:CCDS10448.1    | -0.530257847 | 2.503105079  | 6.788313748 |
| DCAF16:CCDS3423.1    | 0.476716383  | 2.222801515  | 6.787506267 |
| CYP2E1:CCDS7686.1    | -0.589686573 | 1.202350951  | 6.785467345 |
| BCLAF1:CCDS47485.1   | 0.491253845  | 5.57387295   | 6.784571396 |
| ZNHIT6:CCDS53338.1   | 0.51579665   | 3.253181656  | 6.780158254 |
| OGFOD1:CCDS10761.2   | 0.398287733  | 4.798337696  | 6.773936338 |
| CENPBD1:CCDS45556.1  | -1.465555399 | 4.006430146  | 6.769444065 |
| WDR20:CCDS9968.1     | -0.421647008 | 3.60207595   | 6.769345417 |
| SLC12A2:CCDS4144.1   | 0.474197397  | 3.960133146  | 6.765544616 |
| GALP:CCDS12940.1     | -0.786964812 | -0.306521525 | 6.762955655 |
| ELP2:CCDS11918.1     | 0.402316579  | 5.199858148  | 6.762218133 |
| RAB3GAP1:CCDS54402.1 | 0.401051843  | 5.378161754  | 6.761339483 |
| HSPA1L:CCDS34413.1   | -0.56160823  | 1.720678715  | 6.759651227 |
| DEF8:CCDS10989.1     | -1.10585701  | 7.723168962  | 6.756358045 |
| AGER:CCDS56418.1     | 0.525292814  | 2.073929581  | 6.751976009 |
| EFCAB11:CCDS9887.1   | 0.58305587   | 1.227439976  | 6.75150148  |
| DLGAP1:CCDS56053.1   | -0.568296898 | 4.034761575  | 6.751095886 |
| RUNDC3A:CCDS45699.1  | -0.684612509 | 6.708660704  | 6.747847221 |
| CHST8:CCDS12433.1    | -0.760463519 | 3.261325907  | 6.743003893 |
| LGR6:CCDS30972.1     | -0.914301476 | 2.027639018  | 6.740082714 |
| DDX28:CCDS10858.1    | -0.431981654 | 3.177006944  | 6.736485218 |
| CACNA1:CCDS46710.1   | -0.727339076 | 3.455619819  | 6.735614105 |
| SLC25A24:CCDS786.1   | 0.528882884  | 3.221671671  | 6.734931238 |
| TTC37:CCDS4072.1     | 0.502143493  | 5.259107387  | 6.734753737 |
| KIAA0141:CCDS4268.1  | 0.454351752  | 5.129087619  | 6.733652899 |
| SPECC1:CCDS32590.1   | 0.494858061  | 5.043489226  | 6.733372552 |
| TMPRSS3:CCDS42939.1  | -0.650531908 | 0.402011523  | 6.732720757 |
| UNC5A:CCDS34299.1    | -0.663324195 | 4.132798728  | 6.732018395 |
| IRF5:CCDS56512.1     | -0.648236384 | 0.928489623  | 6.729742104 |
| ALG1:CCDS10528.1     | 0.43798016   | 4.575247317  | 6.727712584 |
| METTL7B:CCDS8887.2   | -0.80742824  | -0.302863886 | 6.725290895 |
| ANGPTL1:CCDS1327.1   | -0.918177906 | 1.702237067  | 6.725138478 |
| ASIC2:CCDS42296.1    | -0.894118358 | 2.285932673  | 6.719085421 |
| THRAP3:CCDS405.1     | 0.471806671  | 6.676341082  | 6.717907767 |
| UBE2E1:CCDS2639.1    | -0.472880447 | 4.601071685  | 6.715112165 |
| HNRNPH3:CCDS7278.1   | 0.562300822  | 6.543502916  | 6.712321215 |
| PLEKHA6:CCDS1444.1   | 0.414373739  | 5.391519899  | 6.711479851 |
| SPECC1:CCDS42281.1   | 0.494323657  | 5.06933011   | 6.710633558 |
| FRAS1:CCDS54772.1    | 0.655535544  | 4.91573792   | 6.71033151  |
| BCLAF1:CCDS47486.1   | 0.489742313  | 5.646500863  | 6.706070456 |
| ZNF165:CCDS4643.1    | -0.588788005 | 0.727054159  | 6.705567785 |

## TAUvsControls

|                            |              |              |             |
|----------------------------|--------------|--------------|-------------|
| CACNA1:CCDS46711.1         | -0.723794133 | 3.437064792  | 6.703697021 |
| SLC24A4:CCDS45156.1        | -0.565419045 | 1.398721636  | 6.703258267 |
| SLC22A23:CCDS34331.1       | -0.483928134 | 4.039255891  | 6.70268769  |
| SMPD2:CCDS5075.1           | 0.521470445  | 3.318627235  | 6.697386366 |
| ZNF727:CCDS55113.1         | -0.676544485 | 0.391108073  | 6.696878026 |
| RHOXF2:CCDS14594.1         | -0.735471327 | -0.159344762 | 6.694554096 |
| DNAH6:CCDS46348.1          | -0.498127975 | 3.612453495  | 6.692205464 |
| GPM6A:CCDS54822.1          | -0.578330335 | 6.912876814  | 6.69049148  |
| GJB4:CCDS383.1             | -0.802973091 | -0.499504554 | 6.689239543 |
| MAX:CCDS9774.1             | -0.470643916 | 3.578640808  | 6.682600239 |
| CEP250:CCDS13255.1         | 0.43197937   | 5.953458627  | 6.680051795 |
| ANKHD1-EIF4EBP3:CCDS4224.1 | 0.456084287  | 6.260095772  | 6.679721228 |
| PARP9:CCDS54633.1          | -0.547173387 | 1.853979386  | 6.679069232 |
| GNLY:CCDS46354.1           | -0.786995628 | -0.105020883 | 6.678857576 |
| PGAM4:CCDS35338.1          | -0.652425971 | 5.023791109  | 6.675785973 |
| EEA1:CCDS31874.1           | 0.541912554  | 3.950301188  | 6.672298319 |
| HELZ:CCDS42374.1           | 0.501049943  | 4.402650182  | 6.670729599 |
| MGAT3:CCDS13994.2          | -0.49876818  | 3.963384848  | 6.667509388 |
| GUCA1A:CCDS4864.1          | 0.654694401  | 1.358826028  | 6.666809536 |
| FCGR1B:CCDS30820.1         | -0.905219141 | -0.369245246 | 6.666261154 |
| UCKL1:CCDS54479.1          | -0.469051416 | 5.118884754  | 6.66453452  |
| DYNLL2:CCDS11601.1         | 0.537883658  | 5.360013059  | 6.663537378 |
| NOLC1:CCDS7530.1           | 0.48257192   | 6.530431229  | 6.660994302 |
| SCAF11:CCDS8748.2          | 0.52772357   | 4.521899015  | 6.660283677 |
| WDR20:CCDS9969.1           | -0.419232822 | 3.550406729  | 6.660103395 |
| EEPD1:CCDS34619.1          | -0.507470067 | 3.177983577  | 6.659529518 |
| CAMK2G:CCDS7336.1          | -0.448744333 | 5.356880608  | 6.658424129 |
| DICER1:CCDS55941.1         | 0.513713835  | 4.951318039  | 6.657829143 |
| TMEM176B:CCDS47746.1       | -0.678392419 | 1.633975713  | 6.655050794 |
| LRRRC37A3:CCDS32708.1      | 0.36588819   | 4.064846425  | 6.653807882 |
| EYA3:CCDS316.1             | 0.556820995  | 3.272435225  | 6.652258446 |
| ERG:CCDS13658.1            | -0.80262994  | 2.068628087  | 6.651373091 |
| LRRTM4:CCDS46346.1         | -0.53520047  | 2.153448047  | 6.650998216 |
| CMPK2:CCDS42648.1          | -0.663539567 | 1.51136818   | 6.650642777 |
| MAN1A2:CCDS895.1           | 0.502423723  | 3.760923442  | 6.647928369 |
| SPATA4:CCDS3826.1          | -0.720141436 | -0.248191209 | 6.647705554 |
| NCOA4:CCDS44393.1          | 0.40012416   | 6.064736242  | 6.647128494 |
| KIAA1045:CCDS43796.1       | -0.728781253 | 2.247489337  | 6.646462634 |
| ICAM4:CCDS42500.1          | -0.713815626 | -0.45280259  | 6.645808031 |
| HOXB9:CCDS11534.1          | -1.517770595 | 2.807886058  | 6.645731798 |
| MRRF:CCDS55336.1           | 0.48342      | 2.660290464  | 6.645507    |
| CYP2B6:CCDS12570.1         | -0.61735767  | 0.582297714  | 6.644595773 |
| TRPV4:CCDS53827.1          | -0.609780562 | 1.9316822    | 6.641688222 |
| MAP4:CCDS33750.1           | 0.437210589  | 7.948158548  | 6.640233983 |
| GHRH:CCDS13292.1           | -0.77827596  | -0.278316473 | 6.639174872 |
| PRC1:CCDS45352.1           | 0.520004653  | 5.04805301   | 6.638957405 |
| CRIP2:CCDS10003.1          | -0.821386796 | 6.752224711  | 6.636816704 |
| TRPS1:CCDS6318.2           | 0.537368534  | 3.301069184  | 6.636550399 |
| PLD5:CCDS1621.2            | -0.524803444 | 1.690292896  | 6.635305925 |
| ZNF653:CCDS12261.1         | -0.401572848 | 3.779401505  | 6.633679435 |
| SYNGR4:CCDS12717.1         | -0.871294879 | -0.301307813 | 6.633077641 |

## TAUvsControls

|                      |              |              |             |
|----------------------|--------------|--------------|-------------|
| BEX2:CCDS55467.1     | -0.60933235  | 5.047920564  | 6.632315954 |
| AHCYL2:CCDS47708.1   | 0.422738644  | 4.609051944  | 6.631718684 |
| NCOA4:CCDS44394.1    | 0.399673421  | 6.062381346  | 6.631505587 |
| MTSS1L:CCDS32476.1   | -0.474651087 | 6.989360091  | 6.630929604 |
| STAG2:CCDS43990.1    | 0.533274563  | 5.147194469  | 6.630180678 |
| SLC16A8:CCDS13966.1  | -0.665470114 | 0.572835298  | 6.629667527 |
| FAM195A:CCDS10415.1  | -0.694352223 | 3.167319118  | 6.629565605 |
| ELP2:CCDS56067.1     | 0.398825191  | 5.156736375  | 6.627227674 |
| ERG:CCDS13657.1      | -0.801514092 | 1.995539485  | 6.626698826 |
| SSX3:CCDS14291.1     | -1.090848755 | -0.428748849 | 6.62602761  |
| FAM43B:CCDS209.1     | -0.830437095 | 0.653200779  | 6.623732809 |
| SAPCD2:CCDS7027.2    | 0.569616409  | 2.519941622  | 6.621625204 |
| ZNHIT6:CCDS707.1     | 0.514935588  | 3.254787476  | 6.619949658 |
| HBS1L:CCDS47480.1    | 0.507299188  | 2.995508866  | 6.618979378 |
| BCL11A:CCDS46295.1   | -0.87604098  | 4.395855358  | 6.617538894 |
| TMEM91:CCDS46082.1   | 0.477287873  | 1.487795054  | 6.617068453 |
| TP53:CCDS45605.1     | 0.745567439  | 6.530568603  | 6.616361563 |
| OTP:CCDS4039.1       | -0.917588614 | 1.757096612  | 6.615300042 |
| HCN4:CCDS10248.1     | -0.514985952 | 3.8239975    | 6.61373193  |
| KIF1B:CCDS111.1      | 0.532070274  | 8.006890384  | 6.612514481 |
| AHCYL2:CCDS47707.2   | 0.421481521  | 4.610150297  | 6.606743408 |
| TP53:CCDS45606.1     | 0.745053346  | 6.530600122  | 6.603870071 |
| NRP1:CCDS31180.1     | 0.508716159  | 4.859837615  | 6.603215479 |
| NUF2:CCDS1245.1      | 0.585435502  | 2.722797463  | 6.599584818 |
| NDUFA7:CCDS42492.1   | -0.74642126  | 5.89112463   | 6.598973921 |
| ANKHD1:CCDS4225.1    | 0.456771567  | 6.222641092  | 6.58977341  |
| FAM134C:CCDS11432.1  | 0.420662093  | 4.865787753  | 6.584391168 |
| SH2D3C:CCDS48028.1   | -0.54920719  | 4.451282474  | 6.580047413 |
| TMEM194B:CCDS46476.1 | -0.763792352 | 1.836002767  | 6.579835464 |
| S100A2:CCDS1044.1    | -0.865105798 | -0.793195025 | 6.575623231 |
| RAB3GAP1:CCDS33294.1 | 0.392856757  | 5.356889557  | 6.575609558 |
| RBM6:CCDS54586.1     | 0.463752335  | 5.577744729  | 6.574026316 |
| CHD2:CCDS45356.1     | 0.566928713  | 4.012991968  | 6.573175175 |
| SELPLG:CCDS31895.2   | -0.577475459 | 0.598884002  | 6.571654424 |
| CARHSP1:CCDS10537.1  | -0.615820215 | 6.055267287  | 6.570406099 |
| MYCN:CCDS1687.1      | -0.729859395 | 4.549176115  | 6.568899487 |
| TMEM91:CCDS46083.1   | 0.485206239  | 1.438290694  | 6.568414498 |
| SLC25A4:CCDS34114.1  | -0.770168999 | 5.598854163  | 6.5671665   |
| TNNT1:CCDS12917.1    | -1.089927069 | 3.815068918  | 6.56411187  |
| KIRREL3:CCDS53723.1  | -0.672407632 | 4.989182749  | 6.561454662 |
| ADCK1:CCDS9869.1     | 0.398700352  | 3.820270008  | 6.55963841  |
| AIDA:CCDS1533.1      | 0.403179177  | 4.255304927  | 6.557943146 |
| KCNMB3:CCDS3226.1    | -0.760846281 | 0.420452729  | 6.556805739 |
| IKBIP:CCDS9067.1     | -0.580117367 | 1.49249276   | 6.553202053 |
| LAMA3:CCDS42419.1    | -0.569259301 | 3.770511457  | 6.552715426 |
| CBFB:CCDS45508.1     | 0.564264613  | 3.426367375  | 6.552053904 |
| SH2D3C:CCDS48027.1   | -0.493652764 | 4.883780058  | 6.549949386 |
| MPHOSPH8:CCDS9287.1  | 0.487669879  | 4.680255017  | 6.549788455 |
| INO80B:CCDS1942.2    | -0.521722229 | 4.106893497  | 6.549783185 |
| EGF:CCDS3689.1       | -0.594725314 | 2.716070003  | 6.548890644 |
| METAP1:CCDS47110.1   | -0.377298994 | 3.841025595  | 6.548479547 |



## TAUvsControls

|                      |              |              |             |
|----------------------|--------------|--------------|-------------|
| LETM1:CCDS3355.1     | 0.400248877  | 5.473777485  | 6.54834568  |
| GSR:CCDS34877.1      | -0.418624686 | 5.290415231  | 6.547339893 |
| FAIM:CCDS33864.1     | -0.700740728 | 0.691894406  | 6.546436852 |
| SPECC1:CCDS42280.1   | 0.479354585  | 4.382446972  | 6.538810078 |
| MPP3:CCDS42344.1     | -0.479247249 | 4.33214504   | 6.53628427  |
| NCEH1:CCDS54681.1    | -0.628526767 | 0.559758995  | 6.535384191 |
| SHROOM4:CCDS35277.1  | -0.514209162 | 2.609709832  | 6.533615446 |
| GBF1:CCDS7533.1      | 0.381038854  | 7.200351485  | 6.532318264 |
| MID1:CCDS14138.1     | 0.560496139  | 4.867698605  | 6.531767772 |
| CTU1:CCDS12824.1     | -0.727256101 | 1.604526475  | 6.531302693 |
| GPR107:CCDS35162.1   | 0.52457989   | 4.938470795  | 6.526148675 |
| GHRH:CCDS54460.1     | -0.774136522 | -0.291922076 | 6.52252158  |
| PRC1:CCDS32334.1     | 0.513827653  | 5.095585476  | 6.519506518 |
| SH2D3C:CCDS48026.1   | -0.493360539 | 4.888681274  | 6.514944821 |
| RPA3:CCDS5356.1      | -0.611863262 | 3.113337741  | 6.514860912 |
| KCNH3:CCDS8786.1     | -0.620006493 | 3.064206196  | 6.510495479 |
| SCGN:CCDS4561.1      | -1.048158057 | 1.748492716  | 6.507921595 |
| C8orf76:CCDS6341.1   | -0.46128526  | 2.955982878  | 6.502943344 |
| DMD:CCDS14233.1      | -0.408561455 | 4.962824478  | 6.502422711 |
| C9orf129:CCDS43850.1 | -0.484713095 | 2.599668571  | 6.499460968 |
| CKAP5:CCDS7924.1     | 0.513915656  | 7.604796951  | 6.498856127 |
| LSM6:CCDS3767.1      | -0.679889688 | 3.138160951  | 6.497656891 |
| GPRASP1:CCDS35352.1  | 0.476375835  | 3.487531481  | 6.496377626 |
| ARHGAP25:CCDS46312.1 | -0.501750227 | 1.300411127  | 6.496213224 |
| DDX58:CCDS6526.1     | -0.485262869 | 2.182968732  | 6.495344905 |
| GDE1:CCDS10578.1     | -0.636520986 | 4.401481148  | 6.494979076 |
| SYNGR1:CCDS13989.1   | -0.582630602 | 3.763669756  | 6.492684722 |
| ITGA9:CCDS2669.1     | 0.615748879  | 4.036765081  | 6.492307357 |
| C1orf229:CCDS1630.1  | -0.776108227 | -0.498429368 | 6.48905173  |
| RBM25:CCDS32113.1    | 0.489790547  | 5.360792914  | 6.488710506 |
| HOXA3:CCDS5404.1     | -1.063538937 | 2.413778242  | 6.487195883 |
| ARHGAP25:CCDS54364.1 | -0.502373688 | 1.307710344  | 6.48621901  |
| SPECC1:CCDS45628.1   | 0.478775675  | 4.423106193  | 6.485924557 |
| C16orf62:CCDS32397.2 | 0.348145051  | 6.014815162  | 6.484558735 |
| AGER:CCDS56417.1     | 0.523382419  | 2.113716396  | 6.484288584 |
| KLRC2:CCDS31745.1    | -0.723840128 | -0.238526747 | 6.481974176 |
| OR8D2:CCDS31707.1    | -1.166686816 | -0.400788366 | 6.481321576 |
| COMP:CCDS12385.1     | -0.801802044 | 2.209659273  | 6.479542219 |
| RAP2C:CCDS14632.1    | 0.534821375  | 2.454285197  | 6.478663022 |
| DMD:CCDS55395.1      | -0.408089419 | 4.963085606  | 6.477893738 |
| CEP164:CCDS31683.1   | 0.374914921  | 5.185711384  | 6.477592716 |
| MATN3:CCDS46226.1    | -0.854539793 | 1.733868312  | 6.477430154 |
| RAD23A:CCDS12289.1   | -0.577979069 | 6.921899399  | 6.476669941 |
| OSCAR:CCDS12876.1    | -0.663298817 | 0.328947328  | 6.476282986 |
| LAMC3:CCDS6938.1     | 0.875412594  | 4.107642695  | 6.4748603   |
| ERCC4:CCDS32390.1    | 0.448045395  | 2.996032199  | 6.474443428 |
| STAG2:CCDS14607.1    | 0.531883335  | 5.102295171  | 6.47434651  |
| ADCK4:CCDS46081.1    | 0.471957541  | 5.239429438  | 6.472845097 |
| MAP2K3:CCDS11217.1   | -0.513980768 | 4.35999404   | 6.465923702 |
| POU5F1B:CCDS55274.1  | -0.832880721 | 0.319789855  | 6.465367487 |
| TLL1:CCDS56342.1     | -0.709998152 | 0.844039841  | 6.463326192 |

## TAUvsControls

|                      |              |              |             |
|----------------------|--------------|--------------|-------------|
| RPL41:CCDS44919.1    | 0.68419832   | 9.302247544  | 6.46322011  |
| TXLNG:CCDS55373.1    | 0.493554248  | 3.021362938  | 6.461628407 |
| LAMA3:CCDS45838.1    | -0.560842318 | 3.74062085   | 6.459932601 |
| GH1:CCDS42371.1      | -0.937190432 | -0.783610748 | 6.458120634 |
| WIPI2:CCDS47532.1    | -0.482318442 | 6.008086277  | 6.456604158 |
| EPB41:CCDS53289.1    | 0.637186369  | 5.335567011  | 6.455583898 |
| NUP155:CCDS3921.1    | 0.446984775  | 4.704506162  | 6.454758768 |
| ANO6:CCDS31782.1     | 0.628331945  | 4.547693923  | 6.45310903  |
| MBD3L5:CCDS45942.1   | -0.747284385 | -0.556205392 | 6.453088776 |
| RFPL4A:CCDS46201.1   | -1.038375252 | -0.330788879 | 6.452715652 |
| MAX:CCDS9772.1       | -0.461105975 | 4.491414212  | 6.451477497 |
| GRSF1:CCDS47070.1    | 0.375984634  | 4.858655615  | 6.449463652 |
| GAD1:CCDS2240.1      | -0.891859713 | 2.889770145  | 6.447743799 |
| C2orf61:CCDS54356.1  | -0.730736159 | 0.146019878  | 6.44537238  |
| CKAP5:CCDS31477.1    | 0.512371279  | 7.653197548  | 6.444661993 |
| C10orf25:CCDS31187.1 | -0.786178482 | -0.248403177 | 6.442646294 |
| ZNF662:CCDS2708.1    | -0.641369072 | 0.399103752  | 6.441442746 |
| TRUB2:CCDS6897.1     | -0.456112351 | 5.317941766  | 6.440492815 |
| NET1:CCDS7067.1      | 0.448299079  | 4.512090786  | 6.440372243 |
| TGFB1:CCDS33031.1    | -0.684031913 | 4.421294524  | 6.439688077 |
| HKDC1:CCDS7288.1     | -0.716590883 | 2.133087195  | 6.436962532 |
| PAFAH1B2:CCDS53713.1 | 0.61195739   | 4.25076869   | 6.436794145 |
| WIPI2:CCDS34593.1    | -0.479493621 | 6.014157064  | 6.435896251 |
| ONECUT2:CCDS42440.1  | -0.666213531 | 1.084370208  | 6.43320403  |
| SSX7:CCDS14343.1     | -1.222752208 | 0.00508739   | 6.431284107 |
| SH2D3C:CCDS6877.1    | -0.475447812 | 4.899241465  | 6.431261968 |
| C4A:CCDS47404.1      | -0.77324516  | 6.599284178  | 6.429970097 |
| DCDC1:CCDS7872.1     | -0.630999507 | 0.661590762  | 6.429915298 |
| CYP21A2:CCDS4735.1   | -0.527936943 | 1.299970356  | 6.429634751 |
| CCAR1:CCDS7282.1     | 0.467954998  | 5.198925492  | 6.426686458 |
| MBOAT7:CCDS54316.1   | -0.473014394 | 5.083819551  | 6.425932059 |
| SYNE2:CCDS45125.1    | -0.55574106  | 4.683357733  | 6.425415577 |
| LST1:CCDS54985.1     | -0.8517729   | 0.341394039  | 6.422475969 |
| DUSP13:CCDS31224.1   | -0.847262768 | 0.819397864  | 6.421805569 |
| HNRNPA3:CCDS2273.1   | 0.561485365  | 6.81969795   | 6.4174301   |
| HSD11B1L:CCDS45931.1 | -0.533877783 | 4.113466316  | 6.417179358 |
| FAM209A:CCDS33493.1  | -0.842029213 | -0.820936019 | 6.414341228 |
| IFLTD1:CCDS44848.1   | -0.655268773 | 0.74743925   | 6.413684389 |
| GNA11:CCDS12103.1    | -0.554833544 | 5.857361163  | 6.411416202 |
| GNAS:CCDS13471.1     | -1.363912702 | 0.899779053  | 6.410100952 |
| CEP152:CCDS42033.1   | -0.589020744 | 3.262632501  | 6.409474398 |
| WIPI2:CCDS47531.1    | -0.479721605 | 6.029556608  | 6.406532385 |
| MAX:CCDS41965.1      | -0.466422938 | 4.425637441  | 6.40133956  |
| NTSR1:CCDS13502.1    | -0.91953497  | 1.657759859  | 6.401338088 |
| TRABD:CCDS14086.1    | -0.505311807 | 4.207358468  | 6.40107339  |
| ELP2:CCDS56065.1     | 0.389770352  | 5.227145359  | 6.399430128 |
| KIAA0319:CCDS34348.1 | -0.855275317 | 3.15736133   | 6.398552355 |
| GCG:CCDS46439.1      | -1.128203571 | -0.204247726 | 6.395317097 |
| MKKS:CCDS13111.1     | -0.460134789 | 3.115526     | 6.391030605 |
| KRAS:CCDS8702.1      | 0.569976257  | 2.295637467  | 6.390723372 |
| IPP:CCDS30702.1      | 0.460784701  | 2.555659108  | 6.390279326 |

## TAUvsControls

|                      |              |              |             |
|----------------------|--------------|--------------|-------------|
| POSTN:CCDS53864.1    | -1.300737251 | 8.447043324  | 6.388038965 |
| BEST1:CCDS31580.1    | -0.458211096 | 2.279705963  | 6.387041692 |
| HS3ST4:CCDS53995.1   | -1.015737258 | 1.362590864  | 6.386642832 |
| CRIP1:CCDS10004.1    | 1.164099823  | 2.242929237  | 6.386148635 |
| ZNF257:CCDS46030.1   | -0.596829493 | 0.742372773  | 6.386042319 |
| WIPI2:CCDS5339.1     | -0.476969645 | 6.035537656  | 6.385633356 |
| ICT1:CCDS11711.1     | -0.642580322 | 4.650809234  | 6.382008521 |
| DLX5:CCDS5647.1      | -0.873142818 | 1.976652079  | 6.381732261 |
| IGF1:CCDS44961.1     | -0.85132274  | 0.619051486  | 6.381043531 |
| ZDHHC6:CCDS7574.1    | -0.373808761 | 3.453819213  | 6.37810945  |
| LIMCH1:CCDS54765.1   | 0.43132872   | 5.831034205  | 6.376642173 |
| NUP155:CCDS43310.1   | 0.444939508  | 4.643329303  | 6.375988884 |
| PARM1:CCDS47077.1    | 0.509091729  | 3.319296135  | 6.375848269 |
| NOTUM:CCDS32771.2    | -0.556638614 | 1.402164878  | 6.37400358  |
| TMEM91:CCDS46084.1   | 0.486444984  | 1.396073296  | 6.371740193 |
| RAB6B:CCDS3082.1     | -0.482505968 | 6.125277295  | 6.369360001 |
| GPR158:CCDS31166.1   | -0.693647095 | 2.464893283  | 6.363922303 |
| CA9:CCDS6585.1       | -1.255070945 | 1.170733211  | 6.362356868 |
| NT5E:CCDS5002.1      | -0.953347766 | 2.73543026   | 6.362255723 |
| LRRTM4:CCDS46347.1   | -0.526770525 | 2.025636986  | 6.360560143 |
| C19orf52:CCDS12252.1 | -0.474510412 | 2.816823976  | 6.359677151 |
| SLC2A11:CCDS33616.1  | 0.402544808  | 3.657481897  | 6.359431781 |
| IFI44L:CCDS687.2     | -0.671659041 | 1.244827663  | 6.357843028 |
| KDM5A:CCDS41736.1    | 0.529080877  | 5.112638819  | 6.356514177 |
| HS6ST3:CCDS9481.1    | -0.683504806 | 2.161230305  | 6.35593212  |
| KIAA0319:CCDS54969.1 | -0.846472335 | 3.104461624  | 6.354856645 |
| MSH5:CCDS34409.2     | 0.559733534  | 3.114994232  | 6.352224651 |
| ZNF214:CCDS31418.1   | -0.576464531 | 1.079531391  | 6.350602966 |
| SYNPO2:CCDS34054.1   | -0.74740769  | 3.002148214  | 6.350104047 |
| SSC5D:CCDS46196.1    | -0.661634222 | 4.071742577  | 6.348709781 |
| MYBBP1A:CCDS11046.1  | 0.398626324  | 6.20706101   | 6.348245224 |
| SYNDIG1L:CCDS41970.1 | -1.160472397 | 0.817967856  | 6.34736658  |
| LAMP5:CCDS56177.1    | -0.9308219   | 5.033353393  | 6.34083105  |
| TXNIP:CCDS913.1      | 0.626040153  | 7.593189231  | 6.339557335 |
| ATP2C2:CCDS42207.1   | -0.808691236 | 2.055389111  | 6.337885722 |
| MAX:CCDS9771.1       | -0.454290436 | 4.619731353  | 6.336245786 |
| RASAL2:CCDS1322.1    | 0.411357866  | 4.58707124   | 6.335416674 |
| SETMAR:CCDS2563.2    | -0.420266778 | 3.024456952  | 6.331738605 |
| PNISR:CCDS5043.1     | 0.540580571  | 4.957592136  | 6.331593764 |
| GRIA3:CCDS14605.1    | -0.913608676 | 2.868105898  | 6.331370721 |
| APOA2:CCDS1226.1     | -1.243330594 | 0.169759222  | 6.328222404 |
| CAV1:CCDS55156.1     | -0.713137054 | 1.519611388  | 6.326262773 |
| MYEOV:CCDS8190.1     | -0.586312274 | 0.512527637  | 6.325881227 |
| SH2D3C:CCDS6878.1    | -0.477577403 | 4.879019631  | 6.324906267 |
| ELP2:CCDS56069.1     | 0.389147367  | 5.08168684   | 6.32429589  |
| PMPCB:CCDS5730.1     | 0.476744272  | 5.095388177  | 6.320398022 |
| SFT2D3:CCDS2149.1    | -0.653313761 | 0.375936324  | 6.320334292 |
| CDRT1:CCDS45619.1    | -0.544107864 | 1.267167734  | 6.316845258 |
| MRPL46:CCDS10341.1   | -0.583600923 | 3.673328539  | 6.314979701 |
| DDX39B:CCDS4697.1    | 0.584556168  | 8.224568227  | 6.314006916 |
| IL17C:CCDS42217.1    | -0.813565154 | -0.480414088 | 6.311629657 |

## TAUvsControls

|                      |              |              |             |
|----------------------|--------------|--------------|-------------|
| PTRHD1:CCDS33156.1   | 0.590446198  | 4.364058623  | 6.311257721 |
| TMEM62:CCDS32210.1   | -0.429840714 | 2.78690462   | 6.310567865 |
| DNAJB1:CCDS12312.1   | -0.634762843 | 6.039346077  | 6.310079701 |
| EMILIN1:CCDS1733.1   | -0.963837812 | 5.983991728  | 6.306725119 |
| C19orf77:CCDS45915.1 | -1.170810575 | -0.369280156 | 6.305136413 |
| NDUFA4:CCDS5357.1    | -0.928703138 | 7.573157554  | 6.303888482 |
| KIAA0319:CCDS54970.1 | -0.849214244 | 3.141645855  | 6.302921155 |
| ZNF513:CCDS1751.1    | -0.389031791 | 3.84085965   | 6.298791688 |
| ANO6:CCDS44866.1     | 0.617654014  | 4.501212212  | 6.297603716 |
| SDCBP2:CCDS13013.1   | -0.647924124 | 1.516530017  | 6.294420838 |
| C9orf135:CCDS35041.1 | -0.876651041 | -0.156439942 | 6.294369925 |
| MAST4:CCDS47224.1    | -0.608536816 | 0.927382708  | 6.293579789 |
| GALNT14:CCDS1773.2   | -0.74420985  | 3.315429452  | 6.289670166 |
| SLC45A1:CCDS30577.1  | -0.588864182 | 3.815224714  | 6.287997284 |
| PPRC1:CCDS7529.1     | 0.376032795  | 5.454785488  | 6.287658001 |
| HFM1:CCDS30769.2     | -0.540512902 | 2.302047078  | 6.284611196 |
| KIAA1407:CCDS2977.1  | 0.566420837  | 3.062252056  | 6.280621857 |
| SCN4B:CCDS8389.1     | -0.730243085 | 1.607596304  | 6.280353113 |
| PDE6H:CCDS8672.1     | -1.366708176 | 1.150897574  | 6.279998385 |
| CADM4:CCDS12627.1    | -0.580772029 | 7.543227768  | 6.279767803 |
| AJAP1:CCDS54.1       | -0.587826831 | 1.41463758   | 6.276446918 |
| CHD7:CCDS47865.1     | 0.774441036  | 6.892793235  | 6.274262089 |
| ZNF821:CCDS56006.1   | -0.441732428 | 4.811157547  | 6.273105883 |
| TRAF3IP3:CCDS1490.2  | -0.613658205 | 1.361076216  | 6.268153083 |
| PIPOX:CCDS11248.1    | -0.567811239 | 3.2407156    | 6.267401438 |
| POSTN:CCDS45034.1    | -1.281495248 | 8.45496536   | 6.26620283  |
| ACOT1:CCDS32117.1    | -0.66225792  | 1.781382226  | 6.265167352 |
| DOCK8:CCDS55283.1    | -1.068203517 | 3.018084759  | 6.264181607 |
| CLIC6:CCDS13638.1    | -0.560609967 | 2.010956455  | 6.26163697  |
| IL32:CCDS32377.1     | -0.925270176 | 2.059544095  | 6.260507946 |
| C9orf43:CCDS6796.1   | -0.984889907 | 0.890386987  | 6.257225966 |
| PYGM:CCDS53659.1     | -0.559683475 | 2.822001258  | 6.257107793 |
| C10orf12:CCDS7452.1  | 0.473241436  | 2.799217715  | 6.256695706 |
| HCN1:CCDS3952.1      | -0.569455139 | 2.577684181  | 6.256081536 |
| ELP2:CCDS56068.1     | 0.396774637  | 5.025030064  | 6.255140851 |
| ODF2:CCDS56585.1     | 0.516270776  | 5.764579457  | 6.251499946 |
| RNF24:CCDS46577.1    | 0.562617199  | 2.953715945  | 6.251104339 |
| PPP1R1B:CCDS11340.1  | -0.955364608 | 2.11655352   | 6.246517198 |
| ANTXR1:CCDS1892.1    | 0.587337352  | 5.442034296  | 6.245313395 |
| DYRK1A:CCDS13654.1   | 0.472663177  | 3.820545678  | 6.2442486   |
| EEF1A2:CCDS13522.1   | -0.720367723 | 8.834595576  | 6.243160858 |
| FAM168A:CCDS41689.1  | -0.411929167 | 4.920569389  | 6.243106902 |
| PDE8B:CCDS34192.1    | -0.700860961 | 2.177887498  | 6.241965639 |
| ERCC6L:CCDS35329.1   | -0.496861063 | 2.129692452  | 6.239751825 |
| ZNF610:CCDS12851.1   | 0.555900802  | 2.476037121  | 6.239351344 |
| SPTBN1:CCDS33199.1   | 0.500031387  | 9.055356889  | 6.239137648 |
| TFR2:CCDS34707.1     | -0.467624321 | 2.161012291  | 6.238673419 |
| GPR150:CCDS4074.1    | -0.675568535 | -0.089338563 | 6.238467371 |
| CHSY3:CCDS34223.1    | -0.794250133 | 2.645291368  | 6.238131261 |
| NAB1:CCDS2307.1      | -0.38854667  | 4.066794232  | 6.236660447 |
| NEK5:CCDS31979.1     | -0.534630199 | 1.4214766    | 6.236136762 |

## TAUvsControls

|                      |              |             |             |
|----------------------|--------------|-------------|-------------|
| CYP26C1:CCDS7425.1   | 1.345084604  | 2.225146246 | 6.236070731 |
| MRPL11:CCDS8140.1    | 0.671971999  | 4.761384304 | 6.23538066  |
| RSF1:CCDS8253.1      | 0.453985285  | 5.230266666 | 6.234339885 |
| GPR61:CCDS801.1      | -0.532276883 | 1.087837402 | 6.232922559 |
| SIPA1L2:CCDS41474.1  | 0.497743155  | 6.481576398 | 6.230920941 |
| GPR107:CCDS48042.1   | 0.517098971  | 4.988419273 | 6.230605084 |
| TMCC2:CCDS30984.1    | -0.53965495  | 4.75416953  | 6.230291567 |
| GIGYF2:CCDS46543.1   | 0.469307279  | 5.855936453 | 6.22959685  |
| TSHZ3:CCDS12421.2    | -0.406956227 | 3.998819711 | 6.228397463 |
| ZNF610:CCDS54309.1   | 0.576131414  | 2.306282255 | 6.228121552 |
| TSR1:CCDS32525.1     | 0.386896347  | 5.087787662 | 6.227410683 |
| SMPD4:CCDS54398.1    | -0.648879912 | 6.841437796 | 6.227294829 |
| NCSTN:CCDS1203.1     | 0.353459485  | 7.077758371 | 6.22578773  |
| SH2D7:CCDS45315.1    | -0.538097805 | 0.765602439 | 6.225140232 |
| ADCK4:CCDS12562.1    | 0.463411155  | 5.395990559 | 6.224545402 |
| CXorf38:CCDS14253.1  | 0.606817564  | 2.122818431 | 6.224429614 |
| EIF2AK4:CCDS42016.1  | 0.433469266  | 5.678795059 | 6.221345465 |
| ANO6:CCDS55819.1     | 0.615952171  | 4.60098348  | 6.220169108 |
| TNKS1BP1:CCDS7951.1  | 0.401728617  | 6.662933755 | 6.216157923 |
| DLGAP1:CCDS56051.1   | -0.556768884 | 3.850599305 | 6.214472966 |
| CBFB:CCDS10827.1     | 0.544980466  | 3.433972818 | 6.213563175 |
| PTPRK:CCDS5137.1     | 0.483573107  | 5.228478593 | 6.211893889 |
| NIPSNAP3A:CCDS6760.1 | -0.607154504 | 2.412356903 | 6.210529798 |
| EGF:CCDS54795.1      | -0.580441457 | 2.65000647  | 6.208593627 |
| EIF1AX:CCDS14196.1   | -0.434099214 | 3.862989219 | 6.205938026 |
| PPIL4:CCDS34550.1    | 0.429999416  | 4.091012712 | 6.20527591  |
| RASL11B:CCDS3490.1   | -0.623956044 | 3.079090113 | 6.204729082 |
| LRBA:CCDS3773.1      | 0.427834548  | 5.151864502 | 6.204173222 |
| AHSG:CCDS3278.1      | -0.801356278 | 0.808800923 | 6.203066374 |
| CYB5A:CCDS12004.1    | -0.518181958 | 3.690556501 | 6.202775267 |
| GIGYF2:CCDS33401.1   | 0.467733163  | 5.86071012  | 6.202083849 |
| CAPZA3:CCDS8681.1    | -1.133184894 | 0.202198903 | 6.201942689 |
| GAB2:CCDS8260.1      | 0.439049174  | 4.763362431 | 6.200794205 |
| PRR7:CCDS4419.1      | -0.603118442 | 2.845768189 | 6.195564809 |
| CACNG1:CCDS11668.1   | -0.917883158 | 0.952800489 | 6.195432772 |
| IGF2BP3:CCDS5382.1   | 0.621288136  | 4.670812749 | 6.194532631 |
| MAPK13:CCDS4818.1    | -0.539562266 | 1.227538117 | 6.194504802 |
| ANO6:CCDS44865.1     | 0.610814585  | 4.471523797 | 6.193781124 |
| SPTBN1:CCDS33198.1   | 0.496484781  | 9.226876029 | 6.191656807 |
| ADCY5:CCDS3022.1     | -0.585255089 | 5.4743977   | 6.190650826 |
| LRRRC4B:CCDS42595.1  | -0.524093939 | 6.901309915 | 6.187740933 |
| PIK3C3:CCDS11920.1   | 0.40310842   | 4.344359804 | 6.187573696 |
| SMPD4:CCDS42751.1    | -0.649936688 | 7.024144593 | 6.1874534   |
| IL32:CCDS45394.1     | -0.918200529 | 1.874786772 | 6.186331471 |
| GAB2:CCDS8259.1      | 0.437406392  | 4.812193982 | 6.182093714 |
| CCRN4L:CCDS3743.1    | -0.49536581  | 2.565540334 | 6.182042052 |
| PTPRK:CCDS47473.1    | 0.483175555  | 5.243267421 | 6.181426057 |
| SYT10:CCDS8732.1     | -0.753616173 | 0.794361758 | 6.17677405  |
| POSTN:CCDS9364.1     | -1.278543962 | 8.554923294 | 6.176463311 |
| DLGAP1:CCDS56050.1   | -0.548913953 | 3.873872526 | 6.175855806 |
| DLG2:CCDS44692.1     | -0.85162459  | 2.247411348 | 6.175047578 |

## TAUvsControls

|                      |              |              |             |
|----------------------|--------------|--------------|-------------|
| ACN9:CCDS5648.1      | -0.503632063 | 1.36846423   | 6.174350339 |
| IQGAP2:CCDS34188.1   | 0.451322491  | 4.451516147  | 6.173076024 |
| FZR1:CCDS45917.1     | -0.473890089 | 6.243747352  | 6.171700218 |
| S100G:CCDS14176.1    | 0.743345336  | 0.504613354  | 6.170955935 |
| CFHR1:CCDS1386.1     | -0.684525325 | 0.933968044  | 6.170047524 |
| DLGAP1:CCDS56052.1   | -0.561377757 | 3.805372531  | 6.16814509  |
| PHYH:CCDS7097.1      | 0.424286655  | 4.168924255  | 6.168062666 |
| DNMT3A:CCDS33157.1   | 0.527994603  | 5.820151383  | 6.16559916  |
| SLCO3A1:CCDS45354.1  | -0.476122997 | 4.345609886  | 6.165180268 |
| DNAJB6:CCDS5946.1    | -0.416864205 | 5.513165371  | 6.165068782 |
| FSTL3:CCDS12040.1    | -0.543321947 | 1.568575343  | 6.163560652 |
| NKAIN2:CCDS34526.1   | -0.561868519 | 1.455724739  | 6.163374131 |
| SNX10:CCDS56470.1    | 0.814068148  | 2.423534544  | 6.162825929 |
| SVOPL:CCDS5848.1     | -0.798720345 | 0.449509957  | 6.160842229 |
| LZTS1:CCDS6015.1     | -0.519071561 | 4.265285071  | 6.158901429 |
| CACNB3:CCDS55821.1   | -0.554182499 | 6.192928471  | 6.158543381 |
| SMPD4:CCDS2156.2     | -0.649060892 | 6.966113559  | 6.158268401 |
| PCLO:CCDS47631.1     | 0.443426348  | 5.604355188  | 6.157606849 |
| SIDT1:CCDS2974.1     | -0.563659689 | 1.786064996  | 6.157467233 |
| LAMP5:CCDS13106.1    | -0.909670242 | 5.191616956  | 6.15662012  |
| GPSM1:CCDS48056.1    | -0.584884556 | 3.581944433  | 6.154437335 |
| ZMYM4:CCDS389.1      | 0.440314755  | 5.700983987  | 6.153012255 |
| AK1:CCDS6881.1       | -0.589078924 | 5.917017829  | 6.151866173 |
| THY1:CCDS8424.1      | -0.74163861  | 5.27921694   | 6.150167766 |
| KIAA1429:CCDS34923.1 | 0.428985337  | 5.073495918  | 6.149125244 |
| NET1:CCDS41483.1     | 0.432780959  | 4.525976253  | 6.148741763 |
| IPP:CCDS44132.1      | 0.444646794  | 2.547254758  | 6.146972033 |
| DCDC2:CCDS4550.1     | -0.512699622 | 1.083353484  | 6.143678063 |
| HYAL1:CCDS46833.1    | -0.630034795 | -0.172510229 | 6.142287756 |
| MRPL11:CCDS44655.1   | 0.685399034  | 4.814358385  | 6.139971466 |
| DMKN:CCDS46051.1     | -0.640555528 | 3.034541112  | 6.137725065 |
| HIST1H4H:CCDS4604.1  | 1.080570355  | 0.915329694  | 6.137182894 |
| GIGYF2:CCDS46542.1   | 0.467463353  | 5.886459394  | 6.136969672 |
| GPC4:CCDS14637.1     | 0.695465898  | 6.480838502  | 6.135660582 |
| FAIM:CCDS33865.1     | -0.692781673 | 0.669978115  | 6.135615319 |
| GP1BB:CCDS42980.1    | -0.814326197 | 2.120730912  | 6.135542618 |
| KIF21A:CCDS53776.1   | 0.546114994  | 6.414350165  | 6.134283118 |
| MRPS34:CCDS10444.1   | -0.625456215 | 4.927737218  | 6.133359068 |
| GPSM2:CCDS792.2      | 0.426114198  | 3.465111417  | 6.132510438 |
| RBPJ:CCDS33969.1     | 0.45493299   | 4.901601392  | 6.132365961 |
| COL28A1:CCDS43553.1  | -0.711083424 | 2.177950228  | 6.125010375 |
| BSN:CCDS2800.1       | -0.484978417 | 6.05371832   | 6.124866543 |
| PAK7:CCDS13107.1     | -0.553626029 | 3.947593164  | 6.123603647 |
| BARX2:CCDS8481.1     | -0.798657152 | 0.119432538  | 6.122515983 |
| RPGRIP1:CCDS45080.1  | -0.751359293 | 2.368025868  | 6.12104243  |
| RBPJ:CCDS3436.1      | 0.451836206  | 4.857472148  | 6.115025037 |
| DEF8:CCDS45555.1     | -0.916067944 | 6.330444241  | 6.114067121 |
| BAZ2A:CCDS44924.1    | 0.582031729  | 6.771890458  | 6.111688628 |
| PARP9:CCDS54634.1    | -0.517719707 | 2.039210583  | 6.108310087 |
| AMY1B:CCDS30783.1    | -0.670460154 | 1.119771982  | 6.108145619 |
| HDAC8:CCDS55450.1    | -0.445454954 | 2.239941497  | 6.107918375 |

## TAUvsControls

|                       |              |              |             |
|-----------------------|--------------|--------------|-------------|
| GPR123:CCDS41580.1    | -0.686242418 | 2.788441116  | 6.100039083 |
| OR4C16:CCDS31502.1    | -1.117459227 | -0.613629138 | 6.089532388 |
| MT1E:CCDS10764.2      | -0.87146042  | -0.017890803 | 6.089498899 |
| STAT2:CCDS55836.1     | 0.501151078  | 5.371871127  | 6.08560234  |
| SLC2A11:CCDS46673.1   | 0.397950515  | 3.626317115  | 6.085009859 |
| ARFGAP2:CCDS7926.1    | 0.409053316  | 6.711558803  | 6.084490563 |
| SHISA3:CCDS33979.1    | -1.0292045   | 0.491622366  | 6.083275353 |
| GRM8:CCDS5794.1       | -0.486606754 | 2.757779955  | 6.083237067 |
| CYP46A1:CCDS9954.1    | -0.698609764 | 4.031184557  | 6.083088479 |
| ANTXR1:CCDS46314.1    | 0.63244841   | 4.737935749  | 6.082443903 |
| DMD:CCDS14231.1       | -0.446562228 | 3.831920941  | 6.081707721 |
| RPUSD3:CCDS46744.1    | 0.381163959  | 4.48908484   | 6.078087971 |
| MIF:CCDS13819.1       | -0.795405492 | 7.991295583  | 6.072861309 |
| PMAIP1:CCDS11975.1    | -0.78327389  | 0.591847651  | 6.07218461  |
| KIF21A:CCDS31773.1    | 0.544594742  | 6.400509824  | 6.071797707 |
| TSTD1:CCDS44258.1     | -0.899602584 | 0.626691644  | 6.069499981 |
| LHFPL5:CCDS4812.1     | -0.64245482  | -0.254605748 | 6.069429277 |
| SERPIND1:CCDS13783.1  | -0.624910749 | 3.048009681  | 6.069323661 |
| CACNB3:CCDS55822.1    | -0.54949747  | 6.201883386  | 6.06849351  |
| MAP1LC3B2:CCDS41841.1 | -0.574575381 | 2.283160241  | 6.068449889 |
| BEST1:CCDS44623.1     | -0.4552409   | 2.1340353    | 6.066073711 |
| ANKH:CCDS3885.1       | -0.548624495 | 4.867149604  | 6.064071922 |
| MAN1A1:CCDS5122.1     | -0.593292427 | 3.19849803   | 6.063063851 |
| DHRS11:CCDS11315.2    | 0.593756836  | 3.169498489  | 6.057212495 |
| SEPN1:CCDS41282.1     | 0.448440068  | 7.008133009  | 6.056761784 |
| NLRP3:CCDS44346.1     | -0.574908464 | 2.27762994   | 6.055883563 |
| AKAP2:CCDS48003.1     | 0.556634073  | 4.328215964  | 6.055690326 |
| ABI2:CCDS2358.1       | 0.446186643  | 5.774841415  | 6.055069423 |
| PRCC:CCDS1157.1       | -0.476149318 | 6.151391004  | 6.054866244 |
| MORN1:CCDS40.1        | 0.472510333  | 3.108100109  | 6.054482797 |
| VEPH1:CCDS54662.1     | -0.499329635 | 2.417234317  | 6.051605062 |
| SEPT11:CCDS34018.1    | 0.438216292  | 5.987547127  | 6.050176788 |
| PITPNM1:CCDS31620.1   | -0.439765397 | 7.094732921  | 6.047284353 |
| PDZD11:CCDS14400.1    | 0.481550209  | 5.000822419  | 6.046457806 |
| SYF2:CCDS259.1        | 0.503790735  | 4.451772063  | 6.046193256 |
| MRPL11:CCDS8139.1     | 0.676769674  | 4.852903193  | 6.044133714 |
| CAMKK1:CCDS11039.1    | -0.522616208 | 3.282934334  | 6.043584228 |
| SLC24A3:CCDS13140.1   | -0.647847639 | 3.767428491  | 6.042167504 |
| ARHGAP15:CCDS2184.1   | -0.617725945 | 1.280290005  | 6.041744559 |
| PITPNM1:CCDS44659.1   | -0.439561868 | 7.094471036  | 6.039991194 |
| DOCK8:CCDS55284.1     | -1.055229176 | 2.984984883  | 6.039960823 |
| ERBB2IP:CCDS3990.1    | 0.438099878  | 4.874395477  | 6.039724535 |
| ELOVL5:CCDS56434.1    | 0.63356674   | 1.201036932  | 6.039077577 |
| TTLL10:CCDS44036.1    | -0.558203027 | 1.443985604  | 6.037229294 |
| XPNPEP3:CCDS14007.1   | 0.583559525  | 2.905290452  | 6.035963065 |
| CACNB3:CCDS55823.1    | -0.540976487 | 6.072039418  | 6.034631269 |
| UBE2L6:CCDS7960.1     | -0.695861942 | 5.727492689  | 6.032403161 |
| CLSPN:CCDS396.1       | 0.687007927  | 4.379145172  | 6.032202693 |
| C8orf82:CCDS34970.1   | -0.501201426 | 2.905543072  | 6.031705279 |
| DIAPH3:CCDS41898.1    | -0.558439785 | 3.073416624  | 6.031048802 |
| C3orf58:CCDS46929.1   | 0.658935566  | 1.720794305  | 6.029633383 |

TAUvsControls

|                     |              |              |             |
|---------------------|--------------|--------------|-------------|
| PTX3:CCDS3180.1     | -0.77357721  | 4.918629589  | 6.029447124 |
| DLK1:CCDS9963.1     | 0.884913651  | 7.326974568  | 6.029301258 |
| QPCTL:CCDS54282.1   | -0.453082213 | 3.480712137  | 6.029147343 |
| C2orf80:CCDS42809.1 | -0.525801927 | 2.304041359  | 6.0279257   |
| RBPJ:CCDS3437.1     | 0.448969864  | 4.859773447  | 6.025251677 |
| BRWD3:CCDS14447.1   | 0.459441046  | 3.74869115   | 6.023838458 |
| GTF3C3:CCDS2316.1   | 0.433294455  | 4.554190617  | 6.023703511 |
| CCDC6:CCDS7257.1    | 0.520789381  | 4.705563247  | 6.023636918 |
| ABCA8:CCDS11680.1   | 0.815919138  | 3.43613219   | 6.01984047  |
| TEPP:CCDS45496.1    | 0.578148696  | 0.63512216   | 6.018230024 |
| DSN1:CCDS13286.1    | 0.591455226  | 2.665969725  | 6.017827774 |
| ORM2:CCDS6804.1     | -0.7600144   | -0.601784515 | 6.015802556 |
| PTCD3:CCDS33235.1   | 0.423391735  | 4.507502351  | 6.014728684 |
| ZNF488:CCDS7217.1   | -0.539964783 | 1.122601106  | 6.011730534 |
| CHST6:CCDS10918.1   | -0.60972473  | 0.794903013  | 6.010747681 |



## TAUvsControls

| PValue             | FDR                |
|--------------------|--------------------|
| <b>1.27995E-10</b> | <b>5.19905E-09</b> |
| <b>4.54782E-08</b> | <b>7.41293E-07</b> |
| <b>0.002389373</b> | <b>0.010988886</b> |
| 1.59105E-39        | 4.08088E-35        |
| 4.97173E-25        | 5.88516E-21        |
| 6.88349E-25        | 5.88516E-21        |
| 8.12359E-24        | 5.20905E-20        |
| 3.68862E-23        | 1.89219E-19        |
| 1.22048E-22        | 5.21733E-19        |
| 1.43845E-22        | 5.27068E-19        |
| 1.99313E-22        | 6.39021E-19        |
| 4.49365E-22        | 1.28064E-18        |
| 5.91902E-22        | 1.51817E-18        |
| 9.81174E-22        | 2.28783E-18        |
| 1.51457E-21        | 3.23727E-18        |
| 1.68468E-21        | 3.32386E-18        |
| 3.67713E-21        | 6.42678E-18        |
| 3.7585E-21         | 6.42678E-18        |
| 9.04743E-21        | 1.45036E-17        |
| 1.76582E-20        | 2.66421E-17        |
| 4.2812E-20         | 6.10048E-17        |
| 4.94894E-20        | 6.68081E-17        |
| 2.0169E-19         | 2.58658E-16        |
| 2.82764E-19        | 3.45362E-16        |
| 3.10387E-19        | 3.61869E-16        |
| 3.60318E-19        | 3.9515E-16         |
| 3.69745E-19        | 3.9515E-16         |
| 4.83012E-19        | 4.95551E-16        |
| 5.57213E-19        | 5.4969E-16         |
| 6.02522E-19        | 5.72373E-16        |
| 8.75544E-19        | 8.02029E-16        |
| 1.42352E-18        | 1.25903E-15        |
| 1.96842E-18        | 1.68294E-15        |
| 2.22182E-18        | 1.8383E-15         |
| 2.62443E-18        | 2.10356E-15        |
| 3.1555E-18         | 2.45259E-15        |
| 3.29438E-18        | 2.48523E-15        |
| 3.43688E-18        | 2.51864E-15        |
| 4.20942E-18        | 2.99909E-15        |
| 4.52898E-18        | 3.13956E-15        |
| 6.99822E-18        | 4.72361E-15        |
| 1.38013E-17        | 9.07666E-15        |
| 1.65384E-17        | 1.06049E-14        |
| 1.73139E-17        | 1.08313E-14        |
| 1.94098E-17        | 1.14381E-14        |
| 1.94753E-17        | 1.14381E-14        |
| 1.96217E-17        | 1.14381E-14        |
| 2.56743E-17        | 1.44693E-14        |
| 2.59498E-17        | 1.44693E-14        |
| 2.69182E-17        | 1.46899E-14        |

## TAUvsControls

|             |             |
|-------------|-------------|
| 2.92716E-17 | 1.55477E-14 |
| 2.97025E-17 | 1.55477E-14 |
| 3.17999E-17 | 1.63127E-14 |
| 4.77873E-17 | 2.40333E-14 |
| 6.22068E-17 | 3.06835E-14 |
| 6.67005E-17 | 3.22793E-14 |
| 7.1391E-17  | 3.36427E-14 |
| 7.21411E-17 | 3.36427E-14 |
| 8.33718E-17 | 3.81858E-14 |
| 8.61988E-17 | 3.84166E-14 |
| 8.68713E-17 | 3.84166E-14 |
| 9.78138E-17 | 4.18551E-14 |
| 9.79106E-17 | 4.18551E-14 |
| 1.06423E-16 | 4.47482E-14 |
| 1.12229E-16 | 4.64282E-14 |
| 1.14539E-16 | 4.66321E-14 |
| 1.38613E-16 | 5.55514E-14 |
| 1.4747E-16  | 5.81917E-14 |
| 2.1639E-16  | 8.40939E-14 |
| 2.22919E-16 | 8.53382E-14 |
| 2.75283E-16 | 1.01708E-13 |
| 2.75283E-16 | 1.01708E-13 |
| 2.77576E-16 | 1.01708E-13 |
| 3.23027E-16 | 1.16695E-13 |
| 3.37722E-16 | 1.19392E-13 |
| 3.39802E-16 | 1.19392E-13 |
| 3.86592E-16 | 1.3376E-13  |
| 3.94258E-16 | 1.3376E-13  |
| 3.96341E-16 | 1.3376E-13  |
| 4.14301E-16 | 1.38005E-13 |
| 4.42424E-16 | 1.45484E-13 |
| 4.59617E-16 | 1.49224E-13 |
| 4.85407E-16 | 1.55627E-13 |
| 4.93488E-16 | 1.56265E-13 |
| 5.00808E-16 | 1.56649E-13 |
| 5.22096E-16 | 1.6134E-13  |
| 5.33354E-16 | 1.62857E-13 |
| 6.42742E-16 | 1.93949E-13 |
| 6.74014E-16 | 2.01021E-13 |
| 6.92418E-16 | 2.04136E-13 |
| 8.49439E-16 | 2.47583E-13 |
| 8.76342E-16 | 2.52554E-13 |
| 1.12053E-15 | 3.19338E-13 |
| 1.72073E-15 | 4.85E-13    |
| 1.82026E-15 | 5.07477E-13 |
| 1.9144E-15  | 5.27983E-13 |
| 1.99941E-15 | 5.45561E-13 |
| 2.13978E-15 | 5.77717E-13 |
| 2.39264E-15 | 6.3926E-13  |
| 2.52172E-15 | 6.60311E-13 |
| 2.52292E-15 | 6.60311E-13 |

## TAUvsControls

|             |             |
|-------------|-------------|
| 2.99312E-15 | 7.75461E-13 |
| 3.50328E-15 | 8.98555E-13 |
| 3.83294E-15 | 9.73378E-13 |
| 4.02146E-15 | 1.01124E-12 |
| 4.16644E-15 | 1.02854E-12 |
| 4.17046E-15 | 1.02854E-12 |
| 4.29458E-15 | 1.04906E-12 |
| 4.56836E-15 | 1.10541E-12 |
| 6.12226E-15 | 1.46757E-12 |
| 7.01641E-15 | 1.66633E-12 |
| 7.28712E-15 | 1.71475E-12 |
| 9.25075E-15 | 2.15702E-12 |
| 9.77814E-15 | 2.25946E-12 |
| 9.94382E-15 | 2.27722E-12 |
| 1.00476E-14 | 2.28062E-12 |
| 1.07432E-14 | 2.41712E-12 |
| 1.1682E-14  | 2.57171E-12 |
| 1.16849E-14 | 2.57171E-12 |
| 1.17311E-14 | 2.57171E-12 |
| 1.19285E-14 | 2.59283E-12 |
| 1.31438E-14 | 2.83299E-12 |
| 1.35314E-14 | 2.89223E-12 |
| 1.43747E-14 | 3.04709E-12 |
| 1.49706E-14 | 3.12489E-12 |
| 1.49854E-14 | 3.12489E-12 |
| 1.60233E-14 | 3.31438E-12 |
| 1.65631E-14 | 3.39862E-12 |
| 1.68377E-14 | 3.42754E-12 |
| 1.79033E-14 | 3.59773E-12 |
| 1.79543E-14 | 3.59773E-12 |
| 1.90433E-14 | 3.7775E-12  |
| 1.9146E-14  | 3.7775E-12  |
| 1.9789E-14  | 3.87457E-12 |
| 2.19423E-14 | 4.26362E-12 |
| 2.22311E-14 | 4.28727E-12 |
| 2.28743E-14 | 4.37838E-12 |
| 2.35658E-14 | 4.47732E-12 |
| 2.50523E-14 | 4.72475E-12 |
| 2.53561E-14 | 4.74715E-12 |
| 2.64407E-14 | 4.91434E-12 |
| 2.95541E-14 | 5.45347E-12 |
| 3.14448E-14 | 5.76091E-12 |
| 3.33019E-14 | 6.05788E-12 |
| 3.42104E-14 | 6.17931E-12 |
| 3.48369E-14 | 6.24847E-12 |
| 3.5165E-14  | 6.26352E-12 |
| 3.65234E-14 | 6.46062E-12 |
| 4.13665E-14 | 7.21777E-12 |
| 4.13666E-14 | 7.21777E-12 |
| 4.16581E-14 | 7.21952E-12 |
| 4.82918E-14 | 8.19838E-12 |

## TAUvsControls

|             |             |
|-------------|-------------|
| 4.84962E-14 | 8.19838E-12 |
| 4.85669E-14 | 8.19838E-12 |
| 4.85849E-14 | 8.19838E-12 |
| 4.91397E-14 | 8.2378E-12  |
| 5.03803E-14 | 8.39093E-12 |
| 5.17957E-14 | 8.57103E-12 |
| 5.21483E-14 | 8.57406E-12 |
| 5.48451E-14 | 8.96002E-12 |
| 5.57001E-14 | 8.98582E-12 |
| 5.57038E-14 | 8.98582E-12 |
| 5.87598E-14 | 9.41956E-12 |
| 5.96195E-14 | 9.49801E-12 |
| 6.38386E-14 | 1.0002E-11  |
| 6.39396E-14 | 1.0002E-11  |
| 6.39529E-14 | 1.0002E-11  |
| 6.65943E-14 | 1.0352E-11  |
| 7.84907E-14 | 1.21278E-11 |
| 7.94359E-14 | 1.22003E-11 |
| 8.40829E-14 | 1.27351E-11 |
| 8.42823E-14 | 1.27351E-11 |
| 8.44073E-14 | 1.27351E-11 |
| 8.58386E-14 | 1.28753E-11 |
| 8.77238E-14 | 1.30816E-11 |
| 9.19459E-14 | 1.36319E-11 |
| 9.40212E-14 | 1.38595E-11 |
| 9.75731E-14 | 1.43009E-11 |
| 1.0223E-13  | 1.48983E-11 |
| 1.07555E-13 | 1.5505E-11  |
| 1.07602E-13 | 1.5505E-11  |
| 1.08938E-13 | 1.55364E-11 |
| 1.09031E-13 | 1.55364E-11 |
| 1.16302E-13 | 1.64808E-11 |
| 1.20003E-13 | 1.68534E-11 |
| 1.20246E-13 | 1.68534E-11 |
| 1.25272E-13 | 1.74626E-11 |
| 1.26547E-13 | 1.75449E-11 |
| 1.27704E-13 | 1.76101E-11 |
| 1.30846E-13 | 1.78933E-11 |
| 1.31153E-13 | 1.78933E-11 |
| 1.39906E-13 | 1.89865E-11 |
| 1.4517E-13  | 1.95972E-11 |
| 1.48069E-13 | 1.97831E-11 |
| 1.4809E-13  | 1.97831E-11 |
| 1.52533E-13 | 2.01444E-11 |
| 1.53027E-13 | 2.01444E-11 |
| 1.5315E-13  | 2.01444E-11 |
| 1.55233E-13 | 2.03141E-11 |
| 1.58329E-13 | 2.06142E-11 |
| 1.63574E-13 | 2.11895E-11 |
| 1.68358E-13 | 2.16996E-11 |
| 1.69591E-13 | 2.17492E-11 |

## TAUvsControls

|             |             |
|-------------|-------------|
| 1.82769E-13 | 2.33226E-11 |
| 1.86446E-13 | 2.3674E-11  |
| 1.92372E-13 | 2.43061E-11 |
| 2.01808E-13 | 2.53734E-11 |
| 2.06838E-13 | 2.5879E-11  |
| 2.08345E-13 | 2.59409E-11 |
| 2.13349E-13 | 2.63539E-11 |
| 2.14715E-13 | 2.63539E-11 |
| 2.14744E-13 | 2.63539E-11 |
| 2.16625E-13 | 2.64582E-11 |
| 2.19923E-13 | 2.67337E-11 |
| 2.2617E-13  | 2.70903E-11 |
| 2.26439E-13 | 2.70903E-11 |
| 2.26703E-13 | 2.70903E-11 |
| 2.27082E-13 | 2.70903E-11 |
| 2.30719E-13 | 2.73968E-11 |
| 2.33997E-13 | 2.7658E-11  |
| 2.43289E-13 | 2.86244E-11 |
| 2.55655E-13 | 2.98091E-11 |
| 2.55683E-13 | 2.98091E-11 |
| 2.63081E-13 | 3.05329E-11 |
| 2.77382E-13 | 3.20476E-11 |
| 2.83183E-13 | 3.25712E-11 |
| 2.90225E-13 | 3.29214E-11 |
| 2.90327E-13 | 3.29214E-11 |
| 2.90425E-13 | 3.29214E-11 |
| 2.92763E-13 | 3.29214E-11 |
| 2.932E-13   | 3.29214E-11 |
| 2.93929E-13 | 3.29214E-11 |
| 2.95468E-13 | 3.29499E-11 |
| 2.97679E-13 | 3.30527E-11 |
| 3.05194E-13 | 3.3741E-11  |
| 3.0957E-13  | 3.4078E-11  |
| 3.13866E-13 | 3.44032E-11 |
| 3.18541E-13 | 3.47227E-11 |
| 3.19489E-13 | 3.47227E-11 |
| 3.32009E-13 | 3.59312E-11 |
| 3.47447E-13 | 3.7444E-11  |
| 3.50995E-13 | 3.7668E-11  |
| 3.52514E-13 | 3.76735E-11 |
| 3.54198E-13 | 3.76963E-11 |
| 3.62624E-13 | 3.84337E-11 |
| 3.72141E-13 | 3.928E-11   |
| 3.74982E-13 | 3.94177E-11 |
| 4.51264E-13 | 4.72427E-11 |
| 4.72402E-13 | 4.92547E-11 |
| 4.89684E-13 | 5.08498E-11 |
| 5.02514E-13 | 5.19717E-11 |
| 5.08643E-13 | 5.23943E-11 |
| 5.14618E-13 | 5.27977E-11 |
| 5.23176E-13 | 5.34619E-11 |

TAUvsControls

|             |             |
|-------------|-------------|
| 5.30634E-13 | 5.40089E-11 |
| 5.41969E-13 | 5.49445E-11 |
| 5.50137E-13 | 5.5553E-11  |
| 5.80903E-13 | 5.84297E-11 |
| 5.89164E-13 | 5.90291E-11 |
| 5.94774E-13 | 5.93594E-11 |
| 6.18985E-13 | 6.12219E-11 |
| 6.19774E-13 | 6.12219E-11 |
| 6.20598E-13 | 6.12219E-11 |
| 6.38624E-13 | 6.27589E-11 |
| 6.44321E-13 | 6.30771E-11 |
| 6.5151E-13  | 6.35383E-11 |
| 6.55089E-13 | 6.36453E-11 |
| 6.79095E-13 | 6.57287E-11 |
| 6.86878E-13 | 6.62321E-11 |
| 6.97367E-13 | 6.69916E-11 |
| 7.01078E-13 | 6.70969E-11 |
| 7.26796E-13 | 6.92996E-11 |
| 7.33856E-13 | 6.95681E-11 |
| 7.35666E-13 | 6.95681E-11 |
| 7.37749E-13 | 6.95681E-11 |
| 7.54767E-13 | 7.09122E-11 |
| 7.70467E-13 | 7.2123E-11  |
| 7.81596E-13 | 7.28987E-11 |
| 7.84681E-13 | 7.29214E-11 |
| 8.0128E-13  | 7.41951E-11 |
| 8.17073E-13 | 7.53853E-11 |
| 8.23315E-13 | 7.56889E-11 |
| 8.35328E-13 | 7.65191E-11 |
| 8.42851E-13 | 7.69334E-11 |
| 8.57238E-13 | 7.79692E-11 |
| 8.71299E-13 | 7.88221E-11 |
| 8.73093E-13 | 7.88221E-11 |
| 8.75835E-13 | 7.88221E-11 |
| 8.79997E-13 | 7.89178E-11 |
| 8.83052E-13 | 7.89178E-11 |
| 9.28011E-13 | 8.26478E-11 |
| 1.0263E-12  | 9.10021E-11 |
| 1.02891E-12 | 9.10021E-11 |
| 1.04506E-12 | 9.21123E-11 |
| 1.06885E-12 | 9.38866E-11 |
| 1.08826E-12 | 9.51828E-11 |
| 1.09103E-12 | 9.51828E-11 |
| 1.11489E-12 | 9.69348E-11 |
| 1.1276E-12  | 9.7709E-11  |
| 1.19103E-12 | 1.02683E-10 |
| 1.19301E-12 | 1.02683E-10 |
| 1.33096E-12 | 1.14173E-10 |
| 1.3636E-12  | 1.16583E-10 |
| 1.39381E-12 | 1.1877E-10  |
| 1.4549E-12  | 1.23565E-10 |

## TAUvsControls

|             |             |
|-------------|-------------|
| 1.49611E-12 | 1.26646E-10 |
| 1.53713E-12 | 1.2969E-10  |
| 1.58043E-12 | 1.32906E-10 |
| 1.65984E-12 | 1.39128E-10 |
| 1.67273E-12 | 1.39752E-10 |
| 1.68098E-12 | 1.39985E-10 |
| 1.70683E-12 | 1.41678E-10 |
| 1.73607E-12 | 1.4364E-10  |
| 1.76922E-12 | 1.45912E-10 |
| 1.84127E-12 | 1.51368E-10 |
| 1.86627E-12 | 1.52933E-10 |
| 1.89178E-12 | 1.54529E-10 |
| 1.90492E-12 | 1.55109E-10 |
| 1.92111E-12 | 1.55932E-10 |
| 1.99425E-12 | 1.61152E-10 |
| 2.00097E-12 | 1.61152E-10 |
| 2.00525E-12 | 1.61152E-10 |
| 2.01055E-12 | 1.61152E-10 |
| 2.07073E-12 | 1.65459E-10 |
| 2.1039E-12  | 1.67587E-10 |
| 2.27616E-12 | 1.80747E-10 |
| 2.30927E-12 | 1.8281E-10  |
| 2.38337E-12 | 1.88095E-10 |
| 2.41234E-12 | 1.89798E-10 |
| 2.43671E-12 | 1.91129E-10 |
| 2.48028E-12 | 1.93953E-10 |
| 2.52624E-12 | 1.96464E-10 |
| 2.5277E-12  | 1.96464E-10 |
| 2.62457E-12 | 2.03377E-10 |
| 2.67971E-12 | 2.07024E-10 |
| 2.7027E-12  | 2.07642E-10 |
| 2.7039E-12  | 2.07642E-10 |
| 2.75265E-12 | 2.10754E-10 |
| 2.80951E-12 | 2.14467E-10 |
| 2.8238E-12  | 2.14919E-10 |
| 2.8977E-12  | 2.19891E-10 |
| 2.94386E-12 | 2.22735E-10 |
| 2.95767E-12 | 2.22912E-10 |
| 2.96358E-12 | 2.22912E-10 |
| 3.0073E-12  | 2.25539E-10 |
| 3.02721E-12 | 2.2637E-10  |
| 3.12373E-12 | 2.32909E-10 |
| 3.21483E-12 | 2.39006E-10 |
| 3.28693E-12 | 2.4366E-10  |
| 3.35272E-12 | 2.47821E-10 |
| 3.49024E-12 | 2.57245E-10 |
| 3.55863E-12 | 2.61534E-10 |
| 3.58875E-12 | 2.62994E-10 |
| 3.70248E-12 | 2.70556E-10 |
| 3.76921E-12 | 2.7434E-10  |
| 3.77852E-12 | 2.7434E-10  |

## TAUvsControls

|             |             |
|-------------|-------------|
| 3.78636E-12 | 2.7434E-10  |
| 3.79986E-12 | 2.74543E-10 |
| 3.87359E-12 | 2.78429E-10 |
| 3.87536E-12 | 2.78429E-10 |
| 3.9406E-12  | 2.82325E-10 |
| 4.24202E-12 | 3.03074E-10 |
| 4.45978E-12 | 3.17747E-10 |
| 4.55586E-12 | 3.23693E-10 |
| 4.60737E-12 | 3.26449E-10 |
| 4.63052E-12 | 3.27185E-10 |
| 4.80057E-12 | 3.38269E-10 |
| 4.83089E-12 | 3.39473E-10 |
| 4.91326E-12 | 3.44318E-10 |
| 5.08472E-12 | 3.55363E-10 |
| 5.31734E-12 | 3.7061E-10  |
| 5.48336E-12 | 3.81145E-10 |
| 5.67189E-12 | 3.93184E-10 |
| 5.72166E-12 | 3.9517E-10  |
| 5.73135E-12 | 3.9517E-10  |
| 5.76029E-12 | 3.96101E-10 |
| 5.8323E-12  | 3.99981E-10 |
| 5.85246E-12 | 4.00293E-10 |
| 6.17895E-12 | 4.215E-10   |
| 6.26591E-12 | 4.26298E-10 |
| 6.41185E-12 | 4.35073E-10 |
| 6.48338E-12 | 4.38766E-10 |
| 6.51634E-12 | 4.39836E-10 |
| 6.59547E-12 | 4.44009E-10 |
| 6.83342E-12 | 4.58823E-10 |
| 6.91443E-12 | 4.62121E-10 |
| 6.91858E-12 | 4.62121E-10 |
| 7.35194E-12 | 4.89792E-10 |
| 7.58006E-12 | 5.03681E-10 |
| 7.71274E-12 | 5.11173E-10 |
| 7.75623E-12 | 5.12705E-10 |
| 7.80351E-12 | 5.12705E-10 |
| 7.80983E-12 | 5.12705E-10 |
| 7.81581E-12 | 5.12705E-10 |
| 8.14237E-12 | 5.32764E-10 |
| 8.16711E-12 | 5.33023E-10 |
| 8.25494E-12 | 5.37211E-10 |
| 8.27316E-12 | 5.37211E-10 |
| 8.44837E-12 | 5.45164E-10 |
| 8.46595E-12 | 5.45164E-10 |
| 8.4685E-12  | 5.45164E-10 |
| 8.48065E-12 | 5.45164E-10 |
| 8.52869E-12 | 5.46709E-10 |
| 8.54732E-12 | 5.46709E-10 |
| 8.85518E-12 | 5.64991E-10 |
| 9.50056E-12 | 6.04665E-10 |
| 9.55832E-12 | 6.06835E-10 |



## TAUvsControls

|             |             |
|-------------|-------------|
| 9.59875E-12 | 6.07897E-10 |
| 9.71332E-12 | 6.13638E-10 |
| 1.02578E-11 | 6.46443E-10 |
| 1.0295E-11  | 6.47195E-10 |
| 1.04198E-11 | 6.53222E-10 |
| 1.04418E-11 | 6.53222E-10 |
| 1.04981E-11 | 6.55149E-10 |
| 1.06919E-11 | 6.65621E-10 |
| 1.08384E-11 | 6.73106E-10 |
| 1.08651E-11 | 6.73138E-10 |
| 1.09123E-11 | 6.74432E-10 |
| 1.11777E-11 | 6.89057E-10 |
| 1.12027E-11 | 6.89057E-10 |
| 1.13669E-11 | 6.96587E-10 |
| 1.13794E-11 | 6.96587E-10 |
| 1.14575E-11 | 6.99696E-10 |
| 1.1707E-11  | 7.13238E-10 |
| 1.17402E-11 | 7.13567E-10 |
| 1.18369E-11 | 7.17743E-10 |
| 1.1921E-11  | 7.21133E-10 |
| 1.24972E-11 | 7.54214E-10 |
| 1.26309E-11 | 7.60495E-10 |
| 1.27327E-11 | 7.64227E-10 |
| 1.27525E-11 | 7.64227E-10 |
| 1.28656E-11 | 7.69109E-10 |
| 1.2894E-11  | 7.69109E-10 |
| 1.31142E-11 | 7.80431E-10 |
| 1.32654E-11 | 7.876E-10   |
| 1.34905E-11 | 7.99119E-10 |
| 1.35238E-11 | 7.99246E-10 |
| 1.39788E-11 | 8.24235E-10 |
| 1.43652E-11 | 8.45078E-10 |
| 1.52245E-11 | 8.9358E-10  |
| 1.53197E-11 | 8.9711E-10  |
| 1.54779E-11 | 9.04312E-10 |
| 1.56093E-11 | 9.09916E-10 |
| 1.59679E-11 | 9.28709E-10 |
| 1.61723E-11 | 9.37543E-10 |
| 1.61929E-11 | 9.37543E-10 |
| 1.68755E-11 | 9.73663E-10 |
| 1.68927E-11 | 9.73663E-10 |
| 1.69786E-11 | 9.7495E-10  |
| 1.6991E-11  | 9.7495E-10  |
| 1.70379E-11 | 9.7546E-10  |
| 1.71037E-11 | 9.77043E-10 |
| 1.74669E-11 | 9.95572E-10 |
| 1.76515E-11 | 1.00386E-09 |
| 1.77782E-11 | 1.00884E-09 |
| 1.78557E-11 | 1.011E-09   |
| 1.79072E-11 | 1.01168E-09 |
| 1.81167E-11 | 1.02126E-09 |

## TAUvsControls

|             |             |
|-------------|-------------|
| 1.83489E-11 | 1.03209E-09 |
| 1.8461E-11  | 1.03612E-09 |
| 1.85789E-11 | 1.04046E-09 |
| 1.867E-11   | 1.04328E-09 |
| 1.88224E-11 | 1.04951E-09 |
| 2.02505E-11 | 1.12669E-09 |
| 2.05383E-11 | 1.14023E-09 |
| 2.10577E-11 | 1.16654E-09 |
| 2.1238E-11  | 1.17166E-09 |
| 2.12414E-11 | 1.17166E-09 |
| 2.14315E-11 | 1.17961E-09 |
| 2.17598E-11 | 1.19511E-09 |
| 2.20117E-11 | 1.20636E-09 |
| 2.25713E-11 | 1.2344E-09  |
| 2.26641E-11 | 1.23683E-09 |
| 2.32474E-11 | 1.26597E-09 |
| 2.34065E-11 | 1.27104E-09 |
| 2.34523E-11 | 1.27104E-09 |
| 2.34891E-11 | 1.27104E-09 |
| 2.40503E-11 | 1.29867E-09 |
| 2.42419E-11 | 1.30626E-09 |
| 2.43437E-11 | 1.309E-09   |
| 2.51623E-11 | 1.35018E-09 |
| 2.56303E-11 | 1.37243E-09 |
| 2.5767E-11  | 1.37687E-09 |
| 2.59406E-11 | 1.38327E-09 |
| 2.62192E-11 | 1.39522E-09 |
| 2.66921E-11 | 1.41745E-09 |
| 2.73178E-11 | 1.44529E-09 |
| 2.73292E-11 | 1.44529E-09 |
| 2.74869E-11 | 1.45064E-09 |
| 2.77931E-11 | 1.46379E-09 |
| 2.78542E-11 | 1.464E-09   |
| 2.83231E-11 | 1.4856E-09  |
| 2.94288E-11 | 1.54045E-09 |
| 3.0844E-11  | 1.61124E-09 |
| 3.10987E-11 | 1.62124E-09 |
| 3.11932E-11 | 1.62265E-09 |
| 3.12523E-11 | 1.62265E-09 |
| 3.1522E-11  | 1.63335E-09 |
| 3.25137E-11 | 1.68134E-09 |
| 3.29903E-11 | 1.70255E-09 |
| 3.32778E-11 | 1.70448E-09 |
| 3.32891E-11 | 1.70448E-09 |
| 3.33013E-11 | 1.70448E-09 |
| 3.33243E-11 | 1.70448E-09 |
| 3.33599E-11 | 1.70448E-09 |
| 3.3559E-11  | 1.71124E-09 |
| 3.37911E-11 | 1.71966E-09 |
| 3.40442E-11 | 1.72911E-09 |
| 3.42216E-11 | 1.73468E-09 |

## TAUvsControls

|             |             |
|-------------|-------------|
| 3.45122E-11 | 1.74596E-09 |
| 3.46264E-11 | 1.74829E-09 |
| 3.51903E-11 | 1.77297E-09 |
| 3.52533E-11 | 1.77297E-09 |
| 3.53269E-11 | 1.77319E-09 |
| 3.55326E-11 | 1.78003E-09 |
| 3.56626E-11 | 1.78306E-09 |
| 3.62409E-11 | 1.80845E-09 |
| 3.64216E-11 | 1.81394E-09 |
| 3.6579E-11  | 1.81824E-09 |
| 3.66677E-11 | 1.81913E-09 |
| 3.78804E-11 | 1.87566E-09 |
| 3.83071E-11 | 1.89314E-09 |
| 3.86836E-11 | 1.90807E-09 |
| 3.90241E-11 | 1.92117E-09 |
| 3.91244E-11 | 1.92242E-09 |
| 3.92058E-11 | 1.92273E-09 |
| 4.00539E-11 | 1.96058E-09 |
| 4.0152E-11  | 1.96163E-09 |
| 4.0526E-11  | 1.97614E-09 |
| 4.07024E-11 | 1.98098E-09 |
| 4.1854E-11  | 2.03317E-09 |
| 4.25081E-11 | 2.06104E-09 |
| 4.26754E-11 | 2.06525E-09 |
| 4.28085E-11 | 2.06779E-09 |
| 4.43605E-11 | 2.13873E-09 |
| 4.45379E-11 | 2.14325E-09 |
| 4.49471E-11 | 2.15889E-09 |
| 4.63442E-11 | 2.22183E-09 |
| 4.69062E-11 | 2.24459E-09 |
| 4.74274E-11 | 2.2653E-09  |
| 4.78646E-11 | 2.28193E-09 |
| 4.80166E-11 | 2.28493E-09 |
| 4.81111E-11 | 2.28519E-09 |
| 4.87595E-11 | 2.30972E-09 |
| 4.88077E-11 | 2.30972E-09 |
| 4.89387E-11 | 2.31165E-09 |
| 4.97549E-11 | 2.34589E-09 |
| 5.00245E-11 | 2.35427E-09 |
| 5.08311E-11 | 2.38785E-09 |
| 5.09278E-11 | 2.38802E-09 |
| 5.12309E-11 | 2.39785E-09 |
| 5.21771E-11 | 2.43769E-09 |
| 5.36954E-11 | 2.50406E-09 |
| 5.4493E-11  | 2.53206E-09 |
| 5.45017E-11 | 2.53206E-09 |
| 5.4592E-11  | 2.53206E-09 |
| 5.51491E-11 | 2.55329E-09 |
| 5.53997E-11 | 2.56027E-09 |
| 5.55693E-11 | 2.56348E-09 |
| 5.60123E-11 | 2.57928E-09 |

## TAUvsControls

|             |             |
|-------------|-------------|
| 5.70915E-11 | 2.62426E-09 |
| 5.77105E-11 | 2.64797E-09 |
| 5.83859E-11 | 2.67418E-09 |
| 5.9524E-11  | 2.72145E-09 |
| 6.11643E-11 | 2.79147E-09 |
| 6.18472E-11 | 2.81762E-09 |
| 6.22276E-11 | 2.82992E-09 |
| 6.2634E-11  | 2.84336E-09 |
| 6.37312E-11 | 2.88806E-09 |
| 6.48238E-11 | 2.93239E-09 |
| 6.50411E-11 | 2.93546E-09 |
| 6.51205E-11 | 2.93546E-09 |
| 6.54254E-11 | 2.94403E-09 |
| 6.6248E-11  | 2.97538E-09 |
| 6.6354E-11  | 2.97538E-09 |
| 6.87897E-11 | 3.07921E-09 |
| 6.91657E-11 | 3.09065E-09 |
| 7.38132E-11 | 3.29258E-09 |
| 7.58234E-11 | 3.37638E-09 |
| 7.61559E-11 | 3.38531E-09 |
| 7.69493E-11 | 3.41466E-09 |
| 7.96731E-11 | 3.52942E-09 |
| 8.084E-11   | 3.57494E-09 |
| 8.22274E-11 | 3.62923E-09 |
| 8.23506E-11 | 3.62923E-09 |
| 8.3429E-11  | 3.66584E-09 |
| 8.34672E-11 | 3.66584E-09 |
| 8.39997E-11 | 3.68292E-09 |
| 8.49315E-11 | 3.71742E-09 |
| 8.57603E-11 | 3.7473E-09  |
| 8.62539E-11 | 3.76246E-09 |
| 8.93257E-11 | 3.88984E-09 |
| 9.36035E-11 | 4.06336E-09 |
| 9.36274E-11 | 4.06336E-09 |
| 9.45689E-11 | 4.09729E-09 |
| 9.49233E-11 | 4.10421E-09 |
| 9.51051E-11 | 4.10421E-09 |
| 9.52085E-11 | 4.10421E-09 |
| 9.5532E-11  | 4.11124E-09 |
| 9.62325E-11 | 4.13445E-09 |
| 9.63947E-11 | 4.13449E-09 |
| 9.66697E-11 | 4.13937E-09 |
| 9.74438E-11 | 4.1587E-09  |
| 9.74456E-11 | 4.1587E-09  |
| 9.77956E-11 | 4.16671E-09 |
| 9.8586E-11  | 4.19342E-09 |
| 1.0061E-10  | 4.27244E-09 |
| 1.00987E-10 | 4.28136E-09 |
| 1.02762E-10 | 4.3494E-09  |
| 1.03446E-10 | 4.37116E-09 |
| 1.03761E-10 | 4.37724E-09 |

## TAUvsControls

|             |             |
|-------------|-------------|
| 1.04522E-10 | 4.40212E-09 |
| 1.04985E-10 | 4.41436E-09 |
| 1.05773E-10 | 4.43419E-09 |
| 1.05802E-10 | 4.43419E-09 |
| 1.06969E-10 | 4.47577E-09 |
| 1.07863E-10 | 4.50583E-09 |
| 1.087E-10   | 4.53341E-09 |
| 1.10831E-10 | 4.61477E-09 |
| 1.11931E-10 | 4.65301E-09 |
| 1.1474E-10  | 4.76208E-09 |
| 1.15036E-10 | 4.76665E-09 |
| 1.15377E-10 | 4.77309E-09 |
| 1.16444E-10 | 4.80547E-09 |
| 1.16535E-10 | 4.80547E-09 |
| 1.16873E-10 | 4.81169E-09 |
| 1.18434E-10 | 4.86202E-09 |
| 1.18475E-10 | 4.86202E-09 |
| 1.19526E-10 | 4.89731E-09 |
| 1.21007E-10 | 4.9501E-09  |
| 1.24306E-10 | 5.07693E-09 |
| 1.24839E-10 | 5.09059E-09 |
| 1.26855E-10 | 5.16462E-09 |
| 1.28106E-10 | 5.19905E-09 |
| 1.29397E-10 | 5.24314E-09 |
| 1.3028E-10  | 5.27058E-09 |
| 1.34389E-10 | 5.42826E-09 |
| 1.34911E-10 | 5.43736E-09 |
| 1.35038E-10 | 5.43736E-09 |
| 1.35693E-10 | 5.45515E-09 |
| 1.35997E-10 | 5.45881E-09 |
| 1.36221E-10 | 5.45926E-09 |
| 1.36943E-10 | 5.47963E-09 |
| 1.38376E-10 | 5.52836E-09 |
| 1.40295E-10 | 5.58848E-09 |
| 1.40317E-10 | 5.58848E-09 |
| 1.41273E-10 | 5.61783E-09 |
| 1.41834E-10 | 5.63144E-09 |
| 1.4341E-10  | 5.68521E-09 |
| 1.44132E-10 | 5.70502E-09 |
| 1.46339E-10 | 5.78342E-09 |
| 1.46684E-10 | 5.78815E-09 |
| 1.51385E-10 | 5.96449E-09 |
| 1.53367E-10 | 6.02566E-09 |
| 1.53408E-10 | 6.02566E-09 |
| 1.54866E-10 | 6.07362E-09 |
| 1.57441E-10 | 6.16179E-09 |
| 1.57594E-10 | 6.16179E-09 |
| 1.60633E-10 | 6.27105E-09 |
| 1.62135E-10 | 6.32006E-09 |
| 1.63002E-10 | 6.32884E-09 |
| 1.63156E-10 | 6.32884E-09 |

## TAUvsControls

|             |             |
|-------------|-------------|
| 1.63252E-10 | 6.32884E-09 |
| 1.63347E-10 | 6.32884E-09 |
| 1.65317E-10 | 6.39549E-09 |
| 1.66382E-10 | 6.42702E-09 |
| 1.6763E-10  | 6.46546E-09 |
| 1.68858E-10 | 6.50305E-09 |
| 1.71862E-10 | 6.60881E-09 |
| 1.73108E-10 | 6.64679E-09 |
| 1.74557E-10 | 6.69239E-09 |
| 1.75524E-10 | 6.71942E-09 |
| 1.76961E-10 | 6.76435E-09 |
| 1.78667E-10 | 6.81584E-09 |
| 1.7884E-10  | 6.81584E-09 |
| 1.83729E-10 | 6.98709E-09 |
| 1.83878E-10 | 6.98709E-09 |
| 1.87141E-10 | 7.10057E-09 |
| 1.88351E-10 | 7.13144E-09 |
| 1.88511E-10 | 7.13144E-09 |
| 1.89725E-10 | 7.16678E-09 |
| 1.9023E-10  | 7.17532E-09 |
| 1.91028E-10 | 7.19483E-09 |
| 1.92725E-10 | 7.24812E-09 |
| 1.95562E-10 | 7.34401E-09 |
| 1.96423E-10 | 7.36557E-09 |
| 1.96818E-10 | 7.36603E-09 |
| 1.9701E-10  | 7.36603E-09 |
| 1.98173E-10 | 7.39601E-09 |
| 1.98388E-10 | 7.39601E-09 |
| 1.98909E-10 | 7.40466E-09 |
| 2.01826E-10 | 7.50238E-09 |
| 2.04941E-10 | 7.60715E-09 |
| 2.0764E-10  | 7.68245E-09 |
| 2.0813E-10  | 7.68245E-09 |
| 2.08167E-10 | 7.68245E-09 |
| 2.08168E-10 | 7.68245E-09 |
| 2.09958E-10 | 7.73737E-09 |
| 2.18484E-10 | 8.04004E-09 |
| 2.22065E-10 | 8.14759E-09 |
| 2.22227E-10 | 8.14759E-09 |
| 2.2236E-10  | 8.14759E-09 |
| 2.22809E-10 | 8.1524E-09  |
| 2.25252E-10 | 8.23004E-09 |
| 2.25641E-10 | 8.23254E-09 |
| 2.26145E-10 | 8.23919E-09 |
| 2.26827E-10 | 8.25232E-09 |
| 2.30625E-10 | 8.37862E-09 |
| 2.31012E-10 | 8.38079E-09 |
| 2.32032E-10 | 8.3986E-09  |
| 2.32157E-10 | 8.3986E-09  |
| 2.34108E-10 | 8.45724E-09 |
| 2.34646E-10 | 8.46473E-09 |

## TAUvsControls

|             |             |
|-------------|-------------|
| 2.35913E-10 | 8.49287E-09 |
| 2.36088E-10 | 8.49287E-09 |
| 2.396E-10   | 8.60713E-09 |
| 2.404E-10   | 8.62381E-09 |
| 2.42491E-10 | 8.68667E-09 |
| 2.44779E-10 | 8.7564E-09  |
| 2.48882E-10 | 8.89079E-09 |
| 2.49801E-10 | 8.90523E-09 |
| 2.49981E-10 | 8.90523E-09 |
| 2.5213E-10  | 8.96931E-09 |
| 2.5791E-10  | 9.16222E-09 |
| 2.59095E-10 | 9.19161E-09 |
| 2.59736E-10 | 9.20163E-09 |
| 2.62093E-10 | 9.2723E-09  |
| 2.64221E-10 | 9.33471E-09 |
| 2.67316E-10 | 9.43108E-09 |
| 2.72993E-10 | 9.61733E-09 |
| 2.73345E-10 | 9.61733E-09 |
| 2.7488E-10  | 9.65809E-09 |
| 2.7591E-10  | 9.68101E-09 |
| 2.80703E-10 | 9.83571E-09 |
| 2.81548E-10 | 9.85189E-09 |
| 2.85575E-10 | 9.97916E-09 |
| 2.85979E-10 | 9.97968E-09 |
| 2.86831E-10 | 9.99584E-09 |
| 2.90824E-10 | 1.01081E-08 |
| 2.9084E-10  | 1.01081E-08 |
| 2.9321E-10  | 1.01766E-08 |
| 2.97297E-10 | 1.0294E-08  |
| 2.97395E-10 | 1.0294E-08  |
| 3.03335E-10 | 1.04777E-08 |
| 3.03519E-10 | 1.04777E-08 |
| 3.05366E-10 | 1.05273E-08 |
| 3.08044E-10 | 1.06054E-08 |
| 3.09394E-10 | 1.06376E-08 |
| 3.09813E-10 | 1.06377E-08 |
| 3.10365E-10 | 1.06425E-08 |
| 3.12672E-10 | 1.06954E-08 |
| 3.12797E-10 | 1.06954E-08 |
| 3.13161E-10 | 1.06954E-08 |
| 3.15688E-10 | 1.07674E-08 |
| 3.18791E-10 | 1.08588E-08 |
| 3.20702E-10 | 1.08989E-08 |
| 3.20818E-10 | 1.08989E-08 |
| 3.23928E-10 | 1.099E-08   |
| 3.25329E-10 | 1.10229E-08 |
| 3.29285E-10 | 1.11423E-08 |
| 3.31067E-10 | 1.11878E-08 |
| 3.31584E-10 | 1.11905E-08 |
| 3.39337E-10 | 1.14371E-08 |
| 3.40474E-10 | 1.14604E-08 |

## TAUvsControls

|             |             |
|-------------|-------------|
| 3.44312E-10 | 1.15682E-08 |
| 3.44621E-10 | 1.15682E-08 |
| 3.45029E-10 | 1.15682E-08 |
| 3.47482E-10 | 1.16352E-08 |
| 3.53674E-10 | 1.18271E-08 |
| 3.60057E-10 | 1.20249E-08 |
| 3.72214E-10 | 1.2414E-08  |
| 3.72676E-10 | 1.2414E-08  |
| 3.76567E-10 | 1.25273E-08 |
| 3.79635E-10 | 1.2613E-08  |
| 3.81149E-10 | 1.2647E-08  |
| 3.91563E-10 | 1.29757E-08 |
| 3.92632E-10 | 1.29941E-08 |
| 3.93131E-10 | 1.29941E-08 |
| 4.06937E-10 | 1.34331E-08 |
| 4.11539E-10 | 1.35676E-08 |
| 4.24869E-10 | 1.3989E-08  |
| 4.2661E-10  | 1.40283E-08 |
| 4.28109E-10 | 1.40596E-08 |
| 4.32774E-10 | 1.41947E-08 |
| 4.34781E-10 | 1.42315E-08 |
| 4.35006E-10 | 1.42315E-08 |
| 4.43959E-10 | 1.45058E-08 |
| 4.45359E-10 | 1.45331E-08 |
| 4.4736E-10  | 1.45798E-08 |
| 4.49814E-10 | 1.4626E-08  |
| 4.49916E-10 | 1.4626E-08  |
| 4.58044E-10 | 1.48714E-08 |
| 4.62367E-10 | 1.49927E-08 |
| 4.66869E-10 | 1.51196E-08 |
| 4.68661E-10 | 1.51416E-08 |
| 4.68729E-10 | 1.51416E-08 |
| 4.71523E-10 | 1.52127E-08 |
| 4.73414E-10 | 1.52545E-08 |
| 4.81246E-10 | 1.54874E-08 |
| 4.83178E-10 | 1.55301E-08 |
| 4.8515E-10  | 1.5574E-08  |
| 4.92849E-10 | 1.58014E-08 |
| 4.97617E-10 | 1.59343E-08 |
| 5.03637E-10 | 1.6107E-08  |
| 5.07229E-10 | 1.62016E-08 |
| 5.14775E-10 | 1.64222E-08 |
| 5.19226E-10 | 1.65407E-08 |
| 5.19779E-10 | 1.65407E-08 |
| 5.23201E-10 | 1.6629E-08  |
| 5.25769E-10 | 1.66899E-08 |
| 5.31498E-10 | 1.68509E-08 |
| 5.34434E-10 | 1.69231E-08 |
| 5.39387E-10 | 1.70502E-08 |
| 5.39777E-10 | 1.70502E-08 |
| 5.48959E-10 | 1.73189E-08 |



## TAUvsControls

|             |             |
|-------------|-------------|
| 5.51692E-10 | 1.73837E-08 |
| 5.52388E-10 | 1.73843E-08 |
| 5.65003E-10 | 1.77595E-08 |
| 5.66074E-10 | 1.77714E-08 |
| 5.67645E-10 | 1.77989E-08 |
| 5.71504E-10 | 1.7898E-08  |
| 5.80101E-10 | 1.81451E-08 |
| 5.84581E-10 | 1.8263E-08  |
| 5.86149E-10 | 1.82897E-08 |
| 5.87965E-10 | 1.83241E-08 |
| 5.90511E-10 | 1.83811E-08 |
| 5.93618E-10 | 1.84554E-08 |
| 5.98929E-10 | 1.8598E-08  |
| 6.05133E-10 | 1.87569E-08 |
| 6.05509E-10 | 1.87569E-08 |
| 6.0942E-10  | 1.88553E-08 |
| 6.1243E-10  | 1.89256E-08 |
| 6.16919E-10 | 1.90413E-08 |
| 6.24265E-10 | 1.92449E-08 |
| 6.29091E-10 | 1.93704E-08 |
| 6.35527E-10 | 1.95451E-08 |
| 6.38109E-10 | 1.9601E-08  |
| 6.39806E-10 | 1.96296E-08 |
| 6.53605E-10 | 2.0029E-08  |
| 6.63795E-10 | 2.0317E-08  |
| 6.70095E-10 | 2.04854E-08 |
| 6.73323E-10 | 2.05596E-08 |
| 6.75164E-10 | 2.05913E-08 |
| 6.89865E-10 | 2.10147E-08 |
| 6.93906E-10 | 2.11127E-08 |
| 7.00163E-10 | 2.12778E-08 |
| 7.0247E-10  | 2.13227E-08 |
| 7.08768E-10 | 2.14884E-08 |
| 7.10146E-10 | 2.15048E-08 |
| 7.13871E-10 | 2.15921E-08 |
| 7.15531E-10 | 2.16168E-08 |
| 7.21298E-10 | 2.17522E-08 |
| 7.21709E-10 | 2.17522E-08 |
| 7.26165E-10 | 2.18608E-08 |
| 7.31293E-10 | 2.19829E-08 |
| 7.32452E-10 | 2.19829E-08 |
| 7.32792E-10 | 2.19829E-08 |
| 7.34483E-10 | 2.20079E-08 |
| 7.45701E-10 | 2.2318E-08  |
| 7.65924E-10 | 2.28965E-08 |
| 7.70892E-10 | 2.30182E-08 |
| 7.73213E-10 | 2.30339E-08 |
| 7.73213E-10 | 2.30339E-08 |
| 7.78869E-10 | 2.31754E-08 |
| 7.85801E-10 | 2.33546E-08 |
| 8.01253E-10 | 2.37863E-08 |

## TAUvsControls

|             |             |
|-------------|-------------|
| 8.11713E-10 | 2.40689E-08 |
| 8.13761E-10 | 2.41018E-08 |
| 8.15736E-10 | 2.41324E-08 |
| 8.21911E-10 | 2.42707E-08 |
| 8.22648E-10 | 2.42707E-08 |
| 8.2325E-10  | 2.42707E-08 |
| 8.25435E-10 | 2.43072E-08 |
| 8.34075E-10 | 2.45335E-08 |
| 8.40728E-10 | 2.47008E-08 |
| 8.41771E-10 | 2.47032E-08 |
| 8.55639E-10 | 2.50815E-08 |
| 8.62644E-10 | 2.52579E-08 |
| 8.78459E-10 | 2.56917E-08 |
| 8.84195E-10 | 2.583E-08   |
| 8.92774E-10 | 2.60509E-08 |
| 9.09244E-10 | 2.65014E-08 |
| 9.11921E-10 | 2.65492E-08 |
| 9.16928E-10 | 2.66647E-08 |
| 9.28775E-10 | 2.69786E-08 |
| 9.39552E-10 | 2.72608E-08 |
| 9.47183E-10 | 2.74512E-08 |
| 9.77893E-10 | 2.83092E-08 |
| 1.00856E-09 | 2.91577E-08 |
| 1.00948E-09 | 2.91577E-08 |
| 1.01407E-09 | 2.92575E-08 |
| 1.02014E-09 | 2.93996E-08 |
| 1.0232E-09  | 2.94546E-08 |
| 1.02792E-09 | 2.95573E-08 |
| 1.03687E-09 | 2.97814E-08 |
| 1.0422E-09  | 2.98788E-08 |
| 1.04322E-09 | 2.98788E-08 |
| 1.04376E-09 | 2.98788E-08 |
| 1.05147E-09 | 3.00659E-08 |
| 1.06045E-09 | 3.02889E-08 |
| 1.0958E-09  | 3.12481E-08 |
| 1.09647E-09 | 3.12481E-08 |
| 1.09946E-09 | 3.12752E-08 |
| 1.09986E-09 | 3.12752E-08 |
| 1.10448E-09 | 3.1372E-08  |
| 1.10669E-09 | 3.13999E-08 |
| 1.11355E-09 | 3.15597E-08 |
| 1.14257E-09 | 3.23428E-08 |
| 1.14371E-09 | 3.23428E-08 |
| 1.15653E-09 | 3.26694E-08 |
| 1.16282E-09 | 3.27824E-08 |
| 1.16308E-09 | 3.27824E-08 |
| 1.17554E-09 | 3.30969E-08 |
| 1.17806E-09 | 3.31317E-08 |
| 1.20213E-09 | 3.37715E-08 |
| 1.20711E-09 | 3.38744E-08 |
| 1.21547E-09 | 3.40717E-08 |

## TAUvsControls

|             |             |
|-------------|-------------|
| 1.23283E-09 | 3.45205E-08 |
| 1.25334E-09 | 3.50565E-08 |
| 1.27388E-09 | 3.55924E-08 |
| 1.27669E-09 | 3.56319E-08 |
| 1.28437E-09 | 3.58075E-08 |
| 1.28797E-09 | 3.58687E-08 |
| 1.28945E-09 | 3.5871E-08  |
| 1.30152E-09 | 3.61676E-08 |
| 1.30376E-09 | 3.61906E-08 |
| 1.31503E-09 | 3.64641E-08 |
| 1.32701E-09 | 3.67564E-08 |
| 1.33388E-09 | 3.6907E-08  |
| 1.34425E-09 | 3.71537E-08 |
| 1.35099E-09 | 3.72999E-08 |
| 1.35745E-09 | 3.74253E-08 |
| 1.35859E-09 | 3.74253E-08 |
| 1.36081E-09 | 3.74253E-08 |
| 1.36137E-09 | 3.74253E-08 |
| 1.37536E-09 | 3.77694E-08 |
| 1.38488E-09 | 3.79901E-08 |
| 1.38974E-09 | 3.80827E-08 |
| 1.41103E-09 | 3.86249E-08 |
| 1.41472E-09 | 3.86845E-08 |
| 1.42193E-09 | 3.88074E-08 |
| 1.42224E-09 | 3.88074E-08 |
| 1.42708E-09 | 3.8896E-08  |
| 1.42852E-09 | 3.8896E-08  |
| 1.44989E-09 | 3.94361E-08 |
| 1.48042E-09 | 4.02239E-08 |
| 1.49842E-09 | 4.06697E-08 |
| 1.50776E-09 | 4.088E-08   |
| 1.50976E-09 | 4.0891E-08  |
| 1.53155E-09 | 4.14376E-08 |
| 1.5336E-09  | 4.14492E-08 |
| 1.54451E-09 | 4.17002E-08 |
| 1.57014E-09 | 4.23476E-08 |
| 1.61216E-09 | 4.34352E-08 |
| 1.62362E-09 | 4.36979E-08 |
| 1.6257E-09  | 4.37082E-08 |
| 1.63178E-09 | 4.38252E-08 |
| 1.63347E-09 | 4.38252E-08 |
| 1.63904E-09 | 4.39288E-08 |
| 1.65358E-09 | 4.42721E-08 |
| 1.66929E-09 | 4.4646E-08  |
| 1.6802E-09  | 4.48912E-08 |
| 1.6971E-09  | 4.52954E-08 |
| 1.73949E-09 | 4.63787E-08 |
| 1.74804E-09 | 4.65581E-08 |
| 1.75005E-09 | 4.65632E-08 |
| 1.75866E-09 | 4.67201E-08 |
| 1.75958E-09 | 4.67201E-08 |

## TAUvsControls

|             |             |
|-------------|-------------|
| 1.76275E-09 | 4.67556E-08 |
| 1.7715E-09  | 4.69393E-08 |
| 1.77348E-09 | 4.69433E-08 |
| 1.79605E-09 | 4.74887E-08 |
| 1.79779E-09 | 4.74887E-08 |
| 1.8013E-09  | 4.75325E-08 |
| 1.80468E-09 | 4.75727E-08 |
| 1.81746E-09 | 4.78603E-08 |
| 1.82038E-09 | 4.78881E-08 |
| 1.85772E-09 | 4.88204E-08 |
| 1.86974E-09 | 4.90861E-08 |
| 1.8765E-09  | 4.92129E-08 |
| 1.9214E-09  | 5.03244E-08 |
| 1.9228E-09  | 5.03244E-08 |
| 1.9327E-09  | 5.05319E-08 |
| 1.93747E-09 | 5.0605E-08  |
| 1.98793E-09 | 5.18488E-08 |
| 1.98913E-09 | 5.18488E-08 |
| 2.01016E-09 | 5.23253E-08 |
| 2.01149E-09 | 5.23253E-08 |
| 2.01373E-09 | 5.23305E-08 |
| 2.02447E-09 | 5.25564E-08 |
| 2.04724E-09 | 5.30938E-08 |
| 2.06501E-09 | 5.35006E-08 |
| 2.11333E-09 | 5.46971E-08 |
| 2.12227E-09 | 5.48324E-08 |
| 2.12283E-09 | 5.48324E-08 |
| 2.12752E-09 | 5.48585E-08 |
| 2.12812E-09 | 5.48585E-08 |
| 2.14452E-09 | 5.52257E-08 |
| 2.15186E-09 | 5.53591E-08 |
| 2.15549E-09 | 5.53969E-08 |
| 2.16066E-09 | 5.54743E-08 |
| 2.20619E-09 | 5.65866E-08 |
| 2.21962E-09 | 5.68742E-08 |
| 2.22923E-09 | 5.70633E-08 |
| 2.26536E-09 | 5.79304E-08 |
| 2.2897E-09  | 5.84946E-08 |
| 2.31465E-09 | 5.90676E-08 |
| 2.31773E-09 | 5.90676E-08 |
| 2.31904E-09 | 5.90676E-08 |
| 2.33473E-09 | 5.94081E-08 |
| 2.34467E-09 | 5.95068E-08 |
| 2.3458E-09  | 5.95068E-08 |
| 2.34669E-09 | 5.95068E-08 |
| 2.34788E-09 | 5.95068E-08 |
| 2.36093E-09 | 5.97783E-08 |
| 2.3645E-09  | 5.98098E-08 |
| 2.39439E-09 | 6.05062E-08 |
| 2.40053E-09 | 6.06016E-08 |
| 2.40434E-09 | 6.06381E-08 |

## TAUvsControls

|             |             |
|-------------|-------------|
| 2.40787E-09 | 6.06673E-08 |
| 2.41927E-09 | 6.08714E-08 |
| 2.42071E-09 | 6.08714E-08 |
| 2.45275E-09 | 6.16167E-08 |
| 2.51281E-09 | 6.30637E-08 |
| 2.51631E-09 | 6.30896E-08 |
| 2.52251E-09 | 6.31835E-08 |
| 2.53015E-09 | 6.3313E-08  |
| 2.53311E-09 | 6.33252E-08 |
| 2.54227E-09 | 6.34924E-08 |
| 2.61926E-09 | 6.53515E-08 |
| 2.63167E-09 | 6.55975E-08 |
| 2.65214E-09 | 6.60434E-08 |
| 2.6779E-09  | 6.66202E-08 |
| 2.71534E-09 | 6.74616E-08 |
| 2.71698E-09 | 6.74616E-08 |
| 2.74695E-09 | 6.81398E-08 |
| 2.75213E-09 | 6.82024E-08 |
| 2.76346E-09 | 6.84169E-08 |
| 2.77557E-09 | 6.86505E-08 |
| 2.78102E-09 | 6.87191E-08 |
| 2.78708E-09 | 6.88026E-08 |
| 2.80415E-09 | 6.91575E-08 |
| 2.82461E-09 | 6.95949E-08 |
| 2.84691E-09 | 7.00772E-08 |
| 2.87814E-09 | 7.07779E-08 |
| 2.89988E-09 | 7.12443E-08 |
| 2.91668E-09 | 7.15885E-08 |
| 2.92182E-09 | 7.16461E-08 |
| 2.93788E-09 | 7.19709E-08 |
| 2.9454E-09  | 7.20865E-08 |
| 2.95098E-09 | 7.21542E-08 |
| 2.97825E-09 | 7.27516E-08 |
| 3.00594E-09 | 7.33582E-08 |
| 3.04917E-09 | 7.43425E-08 |
| 3.05966E-09 | 7.45272E-08 |
| 3.07633E-09 | 7.48622E-08 |
| 3.11176E-09 | 7.56525E-08 |
| 3.12475E-09 | 7.588E-08   |
| 3.12703E-09 | 7.588E-08   |
| 3.14472E-09 | 7.62372E-08 |
| 3.16575E-09 | 7.66175E-08 |
| 3.16638E-09 | 7.66175E-08 |
| 3.229E-09   | 7.80589E-08 |
| 3.23411E-09 | 7.81089E-08 |
| 3.26296E-09 | 7.87315E-08 |
| 3.27878E-09 | 7.90391E-08 |
| 3.28232E-09 | 7.90499E-08 |
| 3.28565E-09 | 7.90559E-08 |
| 3.31891E-09 | 7.97814E-08 |
| 3.34771E-09 | 8.03984E-08 |

## TAUvsControls

|             |             |
|-------------|-------------|
| 3.36409E-09 | 8.0716E-08  |
| 3.38572E-09 | 8.11591E-08 |
| 3.4213E-09  | 8.19356E-08 |
| 3.448E-09   | 8.2498E-08  |
| 3.46099E-09 | 8.27316E-08 |
| 3.47151E-09 | 8.28034E-08 |
| 3.47328E-09 | 8.28034E-08 |
| 3.47368E-09 | 8.28034E-08 |
| 3.47902E-09 | 8.28537E-08 |
| 3.48259E-09 | 8.28618E-08 |
| 3.50274E-09 | 8.32639E-08 |
| 3.54957E-09 | 8.42989E-08 |
| 3.55455E-09 | 8.43392E-08 |
| 3.57152E-09 | 8.46635E-08 |
| 3.66601E-09 | 8.68232E-08 |
| 3.70588E-09 | 8.75585E-08 |
| 3.70631E-09 | 8.75585E-08 |
| 3.7073E-09  | 8.75585E-08 |
| 3.82419E-09 | 9.0236E-08  |
| 3.82778E-09 | 9.02379E-08 |
| 3.86102E-09 | 9.09378E-08 |
| 3.86816E-09 | 9.10224E-08 |
| 3.93747E-09 | 9.25683E-08 |
| 3.94328E-09 | 9.26022E-08 |
| 3.94613E-09 | 9.26022E-08 |
| 3.96356E-09 | 9.29263E-08 |
| 4.00778E-09 | 9.38772E-08 |
| 4.05843E-09 | 9.49551E-08 |
| 4.0612E-09  | 9.49551E-08 |
| 4.07348E-09 | 9.50833E-08 |
| 4.0741E-09  | 9.50833E-08 |
| 4.09502E-09 | 9.53677E-08 |
| 4.0967E-09  | 9.53677E-08 |
| 4.09744E-09 | 9.53677E-08 |
| 4.14947E-09 | 9.64912E-08 |
| 4.17785E-09 | 9.7063E-08  |
| 4.19948E-09 | 9.74773E-08 |
| 4.25169E-09 | 9.86001E-08 |
| 4.2836E-09  | 9.92503E-08 |
| 4.29807E-09 | 9.94957E-08 |
| 4.30551E-09 | 9.9578E-08  |
| 4.3226E-09  | 9.98832E-08 |
| 4.35532E-09 | 1.00549E-07 |
| 4.41168E-09 | 1.01758E-07 |
| 4.46568E-09 | 1.02911E-07 |
| 4.48103E-09 | 1.03172E-07 |
| 4.52677E-09 | 1.04132E-07 |
| 4.53826E-09 | 1.04303E-07 |
| 4.55918E-09 | 1.0469E-07  |
| 4.56852E-09 | 1.0481E-07  |
| 4.59359E-09 | 1.05291E-07 |

## TAUvsControls

|             |             |
|-------------|-------------|
| 4.60579E-09 | 1.05477E-07 |
| 4.61906E-09 | 1.05653E-07 |
| 4.62174E-09 | 1.05653E-07 |
| 4.63548E-09 | 1.05873E-07 |
| 4.65323E-09 | 1.06184E-07 |
| 4.70266E-09 | 1.07216E-07 |
| 4.71757E-09 | 1.07461E-07 |
| 4.74282E-09 | 1.0794E-07  |
| 4.76546E-09 | 1.08359E-07 |
| 4.82243E-09 | 1.09558E-07 |
| 4.84838E-09 | 1.09839E-07 |
| 4.85022E-09 | 1.09839E-07 |
| 4.85304E-09 | 1.09839E-07 |
| 4.85498E-09 | 1.09839E-07 |
| 4.85624E-09 | 1.09839E-07 |
| 4.88795E-09 | 1.10459E-07 |
| 4.89502E-09 | 1.10521E-07 |
| 4.90598E-09 | 1.10672E-07 |
| 4.92788E-09 | 1.11068E-07 |
| 4.94237E-09 | 1.11297E-07 |
| 5.00073E-09 | 1.12512E-07 |
| 5.17989E-09 | 1.16441E-07 |
| 5.20759E-09 | 1.16961E-07 |
| 5.22078E-09 | 1.17155E-07 |
| 5.22941E-09 | 1.1717E-07  |
| 5.23059E-09 | 1.1717E-07  |
| 5.27725E-09 | 1.18112E-07 |
| 5.2872E-09  | 1.18231E-07 |
| 5.29697E-09 | 1.18347E-07 |
| 5.30316E-09 | 1.18382E-07 |
| 5.32597E-09 | 1.18788E-07 |
| 5.34785E-09 | 1.19172E-07 |
| 5.35833E-09 | 1.19302E-07 |
| 5.36936E-09 | 1.19444E-07 |
| 5.39853E-09 | 1.19989E-07 |
| 5.40722E-09 | 1.20078E-07 |
| 5.45105E-09 | 1.20946E-07 |
| 5.46593E-09 | 1.21172E-07 |
| 5.49382E-09 | 1.21685E-07 |
| 5.52602E-09 | 1.22292E-07 |
| 5.53195E-09 | 1.22318E-07 |
| 5.66091E-09 | 1.25062E-07 |
| 5.6764E-09  | 1.25296E-07 |
| 5.73453E-09 | 1.2647E-07  |
| 5.75437E-09 | 1.26799E-07 |
| 5.99785E-09 | 1.32051E-07 |
| 6.00712E-09 | 1.32068E-07 |
| 6.00893E-09 | 1.32068E-07 |
| 6.04148E-09 | 1.32669E-07 |
| 6.08974E-09 | 1.33503E-07 |
| 6.08986E-09 | 1.33503E-07 |

## TAUvsControls

|             |             |
|-------------|-------------|
| 6.12254E-09 | 1.34105E-07 |
| 6.16993E-09 | 1.35028E-07 |
| 6.1997E-09  | 1.35564E-07 |
| 6.27297E-09 | 1.37049E-07 |
| 6.39992E-09 | 1.39614E-07 |
| 6.40126E-09 | 1.39614E-07 |
| 6.40743E-09 | 1.3963E-07  |
| 6.46022E-09 | 1.40661E-07 |
| 6.50482E-09 | 1.41512E-07 |
| 6.52006E-09 | 1.41723E-07 |
| 6.57165E-09 | 1.42723E-07 |
| 6.61035E-09 | 1.43442E-07 |
| 6.64659E-09 | 1.44107E-07 |
| 6.66518E-09 | 1.44388E-07 |
| 6.71204E-09 | 1.4528E-07  |
| 6.75163E-09 | 1.46014E-07 |
| 6.81167E-09 | 1.47188E-07 |
| 6.8781E-09  | 1.48499E-07 |
| 6.91251E-09 | 1.49116E-07 |
| 6.9447E-09  | 1.49685E-07 |
| 6.97143E-09 | 1.50134E-07 |
| 7.0263E-09  | 1.51189E-07 |
| 7.05027E-09 | 1.51578E-07 |
| 7.0761E-09  | 1.52006E-07 |
| 7.08578E-09 | 1.52086E-07 |
| 7.16559E-09 | 1.53671E-07 |
| 7.21281E-09 | 1.54545E-07 |
| 7.2184E-09  | 1.54545E-07 |
| 7.24458E-09 | 1.54976E-07 |
| 7.32927E-09 | 1.56657E-07 |
| 7.35538E-09 | 1.57084E-07 |
| 7.42682E-09 | 1.58478E-07 |
| 7.44182E-09 | 1.58666E-07 |
| 7.46049E-09 | 1.58932E-07 |
| 7.5425E-09  | 1.60546E-07 |
| 7.58486E-09 | 1.61313E-07 |
| 7.64132E-09 | 1.6238E-07  |
| 7.66752E-09 | 1.62697E-07 |
| 7.67278E-09 | 1.62697E-07 |
| 7.6753E-09  | 1.62697E-07 |
| 7.70813E-09 | 1.63258E-07 |
| 7.72587E-09 | 1.63499E-07 |
| 7.77548E-09 | 1.64413E-07 |
| 7.85993E-09 | 1.66062E-07 |
| 7.90093E-09 | 1.66791E-07 |
| 7.9447E-09  | 1.67548E-07 |
| 7.94988E-09 | 1.67548E-07 |
| 7.99547E-09 | 1.68371E-07 |
| 8.04196E-09 | 1.69211E-07 |
| 8.09928E-09 | 1.70277E-07 |
| 8.14749E-09 | 1.71151E-07 |



## TAUvsControls

|             |             |
|-------------|-------------|
| 8.20922E-09 | 1.72306E-07 |
| 8.22689E-09 | 1.72423E-07 |
| 8.22822E-09 | 1.72423E-07 |
| 8.23879E-09 | 1.72443E-07 |
| 8.24265E-09 | 1.72443E-07 |
| 8.28015E-09 | 1.73087E-07 |
| 8.40002E-09 | 1.7545E-07  |
| 8.41806E-09 | 1.75683E-07 |
| 8.43423E-09 | 1.75878E-07 |
| 8.45953E-09 | 1.76262E-07 |
| 8.52383E-09 | 1.77437E-07 |
| 8.52975E-09 | 1.77437E-07 |
| 8.54047E-09 | 1.77516E-07 |
| 8.55099E-09 | 1.77591E-07 |
| 8.57156E-09 | 1.77874E-07 |
| 8.57891E-09 | 1.77882E-07 |
| 8.5914E-09  | 1.77997E-07 |
| 8.61646E-09 | 1.78373E-07 |
| 8.65559E-09 | 1.79038E-07 |
| 8.6925E-09  | 1.79657E-07 |
| 8.73614E-09 | 1.80413E-07 |
| 8.77294E-09 | 1.81027E-07 |
| 8.83888E-09 | 1.82241E-07 |
| 8.85522E-09 | 1.82432E-07 |
| 8.93367E-09 | 1.839E-07   |
| 9.02746E-09 | 1.85682E-07 |
| 9.09851E-09 | 1.86993E-07 |
| 9.13893E-09 | 1.87674E-07 |
| 9.22924E-09 | 1.89377E-07 |
| 9.29713E-09 | 1.90571E-07 |
| 9.3023E-09  | 1.90571E-07 |
| 9.38025E-09 | 1.92014E-07 |
| 9.51164E-09 | 1.94549E-07 |
| 9.56432E-09 | 1.95374E-07 |
| 9.57207E-09 | 1.95374E-07 |
| 9.57485E-09 | 1.95374E-07 |
| 9.66949E-09 | 1.97149E-07 |
| 9.74659E-09 | 1.98563E-07 |
| 9.82344E-09 | 1.99969E-07 |
| 9.87911E-09 | 2.00865E-07 |
| 9.8831E-09  | 2.00865E-07 |
| 9.94344E-09 | 2.01931E-07 |
| 9.95782E-09 | 2.02063E-07 |
| 9.9885E-09  | 2.02417E-07 |
| 9.99105E-09 | 2.02417E-07 |
| 1.01944E-08 | 2.06374E-07 |
| 1.02229E-08 | 2.06787E-07 |
| 1.02566E-08 | 2.07145E-07 |
| 1.02567E-08 | 2.07145E-07 |
| 1.03406E-08 | 2.0867E-07  |
| 1.03557E-08 | 2.0867E-07  |

## TAUvsControls

|             |             |
|-------------|-------------|
| 1.03566E-08 | 2.0867E-07  |
| 1.04208E-08 | 2.09799E-07 |
| 1.04409E-08 | 2.10039E-07 |
| 1.04558E-08 | 2.10061E-07 |
| 1.04584E-08 | 2.10061E-07 |
| 1.06111E-08 | 2.1296E-07  |
| 1.0629E-08  | 2.13154E-07 |
| 1.06739E-08 | 2.13888E-07 |
| 1.07124E-08 | 2.1449E-07  |
| 1.08482E-08 | 2.16927E-07 |
| 1.0851E-08  | 2.16927E-07 |
| 1.09977E-08 | 2.19689E-07 |
| 1.11013E-08 | 2.21585E-07 |
| 1.11469E-08 | 2.22323E-07 |
| 1.11949E-08 | 2.23107E-07 |
| 1.12149E-08 | 2.23332E-07 |
| 1.15493E-08 | 2.29812E-07 |
| 1.16103E-08 | 2.30846E-07 |
| 1.16645E-08 | 2.31616E-07 |
| 1.16886E-08 | 2.31616E-07 |
| 1.16907E-08 | 2.31616E-07 |
| 1.16941E-08 | 2.31616E-07 |
| 1.16941E-08 | 2.31616E-07 |
| 1.17651E-08 | 2.32842E-07 |
| 1.17854E-08 | 2.33063E-07 |
| 1.18112E-08 | 2.33394E-07 |
| 1.18223E-08 | 2.33433E-07 |
| 1.18716E-08 | 2.34226E-07 |
| 1.19418E-08 | 2.3543E-07  |
| 1.19927E-08 | 2.36252E-07 |
| 1.21097E-08 | 2.38375E-07 |
| 1.21855E-08 | 2.39682E-07 |
| 1.23964E-08 | 2.43643E-07 |
| 1.2433E-08  | 2.44176E-07 |
| 1.24606E-08 | 2.44531E-07 |
| 1.25081E-08 | 2.45275E-07 |
| 1.26393E-08 | 2.47659E-07 |
| 1.27011E-08 | 2.4868E-07  |
| 1.27467E-08 | 2.49382E-07 |
| 1.27576E-08 | 2.49405E-07 |
| 1.28431E-08 | 2.50825E-07 |
| 1.28498E-08 | 2.50825E-07 |
| 1.29064E-08 | 2.51738E-07 |
| 1.2969E-08  | 2.52693E-07 |
| 1.29751E-08 | 2.52693E-07 |
| 1.30582E-08 | 2.54023E-07 |
| 1.30631E-08 | 2.54023E-07 |
| 1.32269E-08 | 2.56954E-07 |
| 1.32339E-08 | 2.56954E-07 |
| 1.34096E-08 | 2.60168E-07 |
| 1.3475E-08  | 2.61239E-07 |

## TAUvsControls

|             |             |
|-------------|-------------|
| 1.36174E-08 | 2.63801E-07 |
| 1.36336E-08 | 2.63915E-07 |
| 1.36456E-08 | 2.63949E-07 |
| 1.38183E-08 | 2.67089E-07 |
| 1.38424E-08 | 2.67352E-07 |
| 1.39239E-08 | 2.68725E-07 |
| 1.41039E-08 | 2.71994E-07 |
| 1.41544E-08 | 2.72762E-07 |
| 1.42356E-08 | 2.74121E-07 |
| 1.43085E-08 | 2.75319E-07 |
| 1.43329E-08 | 2.75399E-07 |
| 1.43342E-08 | 2.75399E-07 |
| 1.44278E-08 | 2.76991E-07 |
| 1.44817E-08 | 2.77817E-07 |
| 1.44981E-08 | 2.77923E-07 |
| 1.45609E-08 | 2.78919E-07 |
| 1.46661E-08 | 2.80725E-07 |
| 1.47676E-08 | 2.82456E-07 |
| 1.47881E-08 | 2.82638E-07 |
| 1.48027E-08 | 2.82706E-07 |
| 1.48183E-08 | 2.82793E-07 |
| 1.50741E-08 | 2.87308E-07 |
| 1.50773E-08 | 2.87308E-07 |
| 1.5139E-08  | 2.8827E-07  |
| 1.51513E-08 | 2.88291E-07 |
| 1.54065E-08 | 2.92929E-07 |
| 1.54938E-08 | 2.94372E-07 |
| 1.55386E-08 | 2.95003E-07 |
| 1.5658E-08  | 2.97051E-07 |
| 1.56942E-08 | 2.97518E-07 |
| 1.57739E-08 | 2.98806E-07 |
| 1.58086E-08 | 2.99243E-07 |
| 1.58394E-08 | 2.99606E-07 |
| 1.58838E-08 | 3.00224E-07 |
| 1.59619E-08 | 3.01479E-07 |
| 1.59888E-08 | 3.01764E-07 |
| 1.60284E-08 | 3.02289E-07 |
| 1.63185E-08 | 3.07534E-07 |
| 1.63513E-08 | 3.07925E-07 |
| 1.63719E-08 | 3.08087E-07 |
| 1.64061E-08 | 3.08505E-07 |
| 1.65681E-08 | 3.11322E-07 |
| 1.69525E-08 | 3.18099E-07 |
| 1.69535E-08 | 3.18099E-07 |
| 1.69998E-08 | 3.18733E-07 |
| 1.70386E-08 | 3.1902E-07  |
| 1.70399E-08 | 3.1902E-07  |
| 1.70854E-08 | 3.19639E-07 |
| 1.71219E-08 | 3.20087E-07 |
| 1.71959E-08 | 3.20912E-07 |
| 1.71996E-08 | 3.20912E-07 |

TAUvsControls

|             |             |
|-------------|-------------|
| 1.72036E-08 | 3.20912E-07 |
| 1.7293E-08  | 3.22345E-07 |
| 1.74014E-08 | 3.24132E-07 |
| 1.74211E-08 | 3.24262E-07 |
| 1.74709E-08 | 3.24954E-07 |
| 1.76434E-08 | 3.27925E-07 |
| 1.76636E-08 | 3.28061E-07 |
| 1.79084E-08 | 3.32367E-07 |
| 1.79753E-08 | 3.33369E-07 |
| 1.80642E-08 | 3.34775E-07 |
| 1.81012E-08 | 3.35219E-07 |
| 1.82688E-08 | 3.38077E-07 |
| 1.8314E-08  | 3.3867E-07  |
| 1.83303E-08 | 3.38728E-07 |
| 1.83625E-08 | 3.39079E-07 |
| 1.85192E-08 | 3.41725E-07 |
| 1.85679E-08 | 3.42333E-07 |
| 1.85788E-08 | 3.42333E-07 |
| 1.86067E-08 | 3.426E-07   |
| 1.87078E-08 | 3.44216E-07 |
| 1.8772E-08  | 3.4515E-07  |
| 1.90634E-08 | 3.50256E-07 |
| 1.91317E-08 | 3.51259E-07 |
| 1.94979E-08 | 3.57726E-07 |
| 1.95737E-08 | 3.5886E-07  |
| 1.97073E-08 | 3.61005E-07 |
| 1.97188E-08 | 3.61005E-07 |
| 1.99161E-08 | 3.64357E-07 |
| 1.9943E-08  | 3.64589E-07 |
| 2.00151E-08 | 3.65646E-07 |
| 2.01182E-08 | 3.67268E-07 |
| 2.0211E-08  | 3.68699E-07 |
| 2.02818E-08 | 3.69729E-07 |
| 2.02984E-08 | 3.69769E-07 |
| 2.06535E-08 | 3.7597E-07  |
| 2.07689E-08 | 3.77762E-07 |
| 2.08014E-08 | 3.77762E-07 |
| 2.08051E-08 | 3.77762E-07 |
| 2.08109E-08 | 3.77762E-07 |
| 2.09369E-08 | 3.79781E-07 |
| 2.10175E-08 | 3.80975E-07 |
| 2.10338E-08 | 3.80999E-07 |
| 2.11348E-08 | 3.8256E-07  |
| 2.11507E-08 | 3.82577E-07 |
| 2.13938E-08 | 3.86701E-07 |
| 2.15026E-08 | 3.88395E-07 |
| 2.166E-08   | 3.90962E-07 |
| 2.1699E-08  | 3.91391E-07 |
| 2.17509E-08 | 3.9205E-07  |
| 2.17664E-08 | 3.92054E-07 |
| 2.18012E-08 | 3.92407E-07 |

## TAUvsControls

|             |             |
|-------------|-------------|
| 2.18702E-08 | 3.93373E-07 |
| 2.20429E-08 | 3.96202E-07 |
| 2.21737E-08 | 3.98272E-07 |
| 2.24045E-08 | 4.02137E-07 |
| 2.25352E-08 | 4.04199E-07 |
| 2.25871E-08 | 4.04847E-07 |
| 2.27254E-08 | 4.07041E-07 |
| 2.30801E-08 | 4.13106E-07 |
| 2.30973E-08 | 4.13125E-07 |
| 2.32496E-08 | 4.1556E-07  |
| 2.33975E-08 | 4.17913E-07 |
| 2.35868E-08 | 4.21E-07    |
| 2.36153E-08 | 4.21216E-07 |
| 2.36435E-08 | 4.21426E-07 |
| 2.37628E-08 | 4.23258E-07 |
| 2.41696E-08 | 4.30205E-07 |
| 2.42393E-08 | 4.31147E-07 |
| 2.45795E-08 | 4.36895E-07 |
| 2.46701E-08 | 4.38201E-07 |
| 2.48005E-08 | 4.40213E-07 |
| 2.50616E-08 | 4.44541E-07 |
| 2.51206E-08 | 4.45279E-07 |
| 2.5236E-08  | 4.47015E-07 |
| 2.54074E-08 | 4.49741E-07 |
| 2.54473E-08 | 4.50137E-07 |
| 2.5469E-08  | 4.50209E-07 |
| 2.55457E-08 | 4.51254E-07 |
| 2.55891E-08 | 4.51711E-07 |
| 2.58095E-08 | 4.55288E-07 |
| 2.58756E-08 | 4.56121E-07 |
| 2.58923E-08 | 4.56121E-07 |
| 2.59508E-08 | 4.56838E-07 |
| 2.60027E-08 | 4.57437E-07 |
| 2.61779E-08 | 4.60203E-07 |
| 2.6282E-08  | 4.61401E-07 |
| 2.6282E-08  | 4.61401E-07 |
| 2.67361E-08 | 4.69052E-07 |
| 2.68617E-08 | 4.70934E-07 |
| 2.68862E-08 | 4.71041E-07 |
| 2.69174E-08 | 4.71265E-07 |
| 2.70801E-08 | 4.73791E-07 |
| 2.72142E-08 | 4.75812E-07 |
| 2.75757E-08 | 4.81804E-07 |
| 2.79519E-08 | 4.88045E-07 |
| 2.80151E-08 | 4.88816E-07 |
| 2.82409E-08 | 4.9214E-07  |
| 2.8244E-08  | 4.9214E-07  |
| 2.85532E-08 | 4.9719E-07  |
| 2.86223E-08 | 4.98056E-07 |
| 2.8898E-08  | 5.02511E-07 |
| 2.90226E-08 | 5.04337E-07 |

## TAUvsControls

|             |             |
|-------------|-------------|
| 2.93269E-08 | 5.09279E-07 |
| 2.95662E-08 | 5.13087E-07 |
| 2.96097E-08 | 5.13495E-07 |
| 2.96722E-08 | 5.14231E-07 |
| 2.97193E-08 | 5.14701E-07 |
| 3.00464E-08 | 5.20013E-07 |
| 3.04668E-08 | 5.26933E-07 |
| 3.06035E-08 | 5.28942E-07 |
| 3.06498E-08 | 5.29385E-07 |
| 3.07809E-08 | 5.31291E-07 |
| 3.09313E-08 | 5.33529E-07 |
| 3.09674E-08 | 5.33793E-07 |
| 3.14209E-08 | 5.41246E-07 |
| 3.14727E-08 | 5.41774E-07 |
| 3.15293E-08 | 5.42384E-07 |
| 3.17208E-08 | 5.45312E-07 |
| 3.19283E-08 | 5.48512E-07 |
| 3.20264E-08 | 5.4955E-07  |
| 3.20315E-08 | 5.4955E-07  |
| 3.22203E-08 | 5.52418E-07 |
| 3.22454E-08 | 5.52481E-07 |
| 3.25792E-08 | 5.57826E-07 |
| 3.27845E-08 | 5.60967E-07 |
| 3.28622E-08 | 5.61922E-07 |
| 3.31028E-08 | 5.65658E-07 |
| 3.36148E-08 | 5.74025E-07 |
| 3.36608E-08 | 5.74287E-07 |
| 3.36749E-08 | 5.74287E-07 |
| 3.37408E-08 | 5.75028E-07 |
| 3.39035E-08 | 5.77417E-07 |
| 3.40089E-08 | 5.78828E-07 |
| 3.40483E-08 | 5.79115E-07 |
| 3.43894E-08 | 5.84529E-07 |
| 3.46735E-08 | 5.88966E-07 |
| 3.4852E-08  | 5.91607E-07 |
| 3.53319E-08 | 5.99357E-07 |
| 3.54519E-08 | 6.00996E-07 |
| 3.57727E-08 | 6.05898E-07 |
| 3.57883E-08 | 6.05898E-07 |
| 3.5857E-08  | 6.06661E-07 |
| 3.61887E-08 | 6.11869E-07 |
| 3.64009E-08 | 6.15051E-07 |
| 3.65055E-08 | 6.16411E-07 |
| 3.66579E-08 | 6.18578E-07 |
| 3.69297E-08 | 6.22755E-07 |
| 3.69826E-08 | 6.23237E-07 |
| 3.70424E-08 | 6.23835E-07 |
| 3.71719E-08 | 6.25606E-07 |
| 3.73649E-08 | 6.28441E-07 |
| 3.74427E-08 | 6.29336E-07 |
| 3.75199E-08 | 6.30221E-07 |

## TAUvsControls

|             |             |
|-------------|-------------|
| 3.76712E-08 | 6.32349E-07 |
| 3.77609E-08 | 6.33439E-07 |
| 3.83436E-08 | 6.42794E-07 |
| 3.84408E-08 | 6.44002E-07 |
| 3.86618E-08 | 6.47282E-07 |
| 3.87109E-08 | 6.47681E-07 |
| 3.87806E-08 | 6.48424E-07 |
| 3.93142E-08 | 6.56919E-07 |
| 3.95578E-08 | 6.60559E-07 |
| 3.96887E-08 | 6.62314E-07 |
| 3.98696E-08 | 6.64554E-07 |
| 3.98969E-08 | 6.64554E-07 |
| 3.99007E-08 | 6.64554E-07 |
| 4.01136E-08 | 6.67666E-07 |
| 4.03478E-08 | 6.71129E-07 |
| 4.03949E-08 | 6.71477E-07 |
| 4.05264E-08 | 6.73008E-07 |
| 4.05395E-08 | 6.73008E-07 |
| 4.08446E-08 | 6.77634E-07 |
| 4.10234E-08 | 6.80162E-07 |
| 4.11346E-08 | 6.81564E-07 |
| 4.14601E-08 | 6.86514E-07 |
| 4.18516E-08 | 6.92549E-07 |
| 4.18832E-08 | 6.92626E-07 |
| 4.19554E-08 | 6.93239E-07 |
| 4.19743E-08 | 6.93239E-07 |
| 4.20256E-08 | 6.93639E-07 |
| 4.26092E-08 | 7.02702E-07 |
| 4.26295E-08 | 7.02702E-07 |
| 4.3104E-08  | 7.10067E-07 |
| 4.34415E-08 | 7.15167E-07 |
| 4.35285E-08 | 7.1614E-07  |
| 4.36529E-08 | 7.17727E-07 |
| 4.37692E-08 | 7.19177E-07 |
| 4.38416E-08 | 7.19906E-07 |
| 4.3974E-08  | 7.21619E-07 |
| 4.45098E-08 | 7.29562E-07 |
| 4.4515E-08  | 7.29562E-07 |
| 4.45447E-08 | 7.29583E-07 |
| 4.46709E-08 | 7.31183E-07 |
| 4.47589E-08 | 7.32156E-07 |
| 4.48973E-08 | 7.33952E-07 |
| 4.49536E-08 | 7.34404E-07 |
| 4.50965E-08 | 7.36271E-07 |
| 4.51453E-08 | 7.36598E-07 |
| 4.55105E-08 | 7.41293E-07 |
| 4.55198E-08 | 7.41293E-07 |
| 4.59378E-08 | 7.47626E-07 |
| 4.61288E-08 | 7.50258E-07 |
| 4.65011E-08 | 7.55771E-07 |
| 4.65266E-08 | 7.55771E-07 |

## TAUvsControls

|             |             |
|-------------|-------------|
| 4.65709E-08 | 7.56011E-07 |
| 4.6666E-08  | 7.57076E-07 |
| 4.66957E-08 | 7.57078E-07 |
| 4.68646E-08 | 7.59338E-07 |
| 4.70214E-08 | 7.61397E-07 |
| 4.71546E-08 | 7.63072E-07 |
| 4.72309E-08 | 7.63824E-07 |
| 4.74809E-08 | 7.67383E-07 |
| 4.83849E-08 | 7.81501E-07 |
| 4.84857E-08 | 7.82637E-07 |
| 4.86363E-08 | 7.84573E-07 |
| 4.90362E-08 | 7.90528E-07 |
| 4.92547E-08 | 7.93552E-07 |
| 4.93972E-08 | 7.95347E-07 |
| 4.9467E-08  | 7.95971E-07 |
| 4.97328E-08 | 7.99746E-07 |
| 4.99447E-08 | 8.02651E-07 |
| 5.00673E-08 | 8.04119E-07 |
| 5.02314E-08 | 8.06249E-07 |
| 5.05914E-08 | 8.11519E-07 |
| 5.08999E-08 | 8.15957E-07 |
| 5.14369E-08 | 8.24051E-07 |
| 5.15444E-08 | 8.25257E-07 |
| 5.18058E-08 | 8.28703E-07 |
| 5.18242E-08 | 8.28703E-07 |
| 5.25708E-08 | 8.40117E-07 |
| 5.2945E-08  | 8.45571E-07 |
| 5.33117E-08 | 8.50898E-07 |
| 5.37864E-08 | 8.5794E-07  |
| 5.41258E-08 | 8.62817E-07 |
| 5.425E-08   | 8.6426E-07  |
| 5.43885E-08 | 8.65928E-07 |
| 5.45148E-08 | 8.674E-07   |
| 5.45506E-08 | 8.67432E-07 |
| 5.48286E-08 | 8.71313E-07 |
| 5.49074E-08 | 8.72025E-07 |
| 5.50976E-08 | 8.74504E-07 |
| 5.53105E-08 | 8.7734E-07  |
| 5.56546E-08 | 8.82253E-07 |
| 5.64156E-08 | 8.93764E-07 |
| 5.67891E-08 | 8.99126E-07 |
| 5.70189E-08 | 9.02207E-07 |
| 5.7123E-08  | 9.03297E-07 |
| 5.72249E-08 | 9.0435E-07  |
| 5.72916E-08 | 9.04847E-07 |
| 5.73697E-08 | 9.05524E-07 |
| 5.74247E-08 | 9.05834E-07 |
| 5.76208E-08 | 9.08369E-07 |
| 5.8271E-08  | 9.18055E-07 |
| 5.84654E-08 | 9.20118E-07 |
| 5.84737E-08 | 9.20118E-07 |



## TAUvsControls

|             |             |
|-------------|-------------|
| 5.8551E-08  | 9.20769E-07 |
| 5.8817E-08  | 9.24386E-07 |
| 5.90242E-08 | 9.26995E-07 |
| 5.90553E-08 | 9.26995E-07 |
| 5.90958E-08 | 9.27012E-07 |
| 5.91287E-08 | 9.27012E-07 |
| 5.92561E-08 | 9.28442E-07 |
| 5.94064E-08 | 9.30229E-07 |
| 5.96439E-08 | 9.33377E-07 |
| 5.9742E-08  | 9.3417E-07  |
| 5.97673E-08 | 9.3417E-07  |
| 6.01294E-08 | 9.39256E-07 |
| 6.02978E-08 | 9.40754E-07 |
| 6.03301E-08 | 9.40754E-07 |
| 6.03353E-08 | 9.40754E-07 |
| 6.08945E-08 | 9.48896E-07 |
| 6.0959E-08  | 9.49325E-07 |
| 6.11131E-08 | 9.50429E-07 |
| 6.11212E-08 | 9.50429E-07 |
| 6.11411E-08 | 9.50429E-07 |
| 6.13039E-08 | 9.52382E-07 |
| 6.14665E-08 | 9.54331E-07 |
| 6.17751E-08 | 9.58542E-07 |
| 6.20062E-08 | 9.61547E-07 |
| 6.24514E-08 | 9.67864E-07 |
| 6.25132E-08 | 9.68237E-07 |
| 6.26104E-08 | 9.69158E-07 |
| 6.36396E-08 | 9.84495E-07 |
| 6.428E-08   | 9.93802E-07 |
| 6.4553E-08  | 9.97421E-07 |
| 6.48273E-08 | 1.00106E-06 |
| 6.50003E-08 | 1.00312E-06 |
| 6.50861E-08 | 1.00385E-06 |
| 6.53688E-08 | 1.00711E-06 |
| 6.5399E-08  | 1.00711E-06 |
| 6.54157E-08 | 1.00711E-06 |
| 6.5678E-08  | 1.01054E-06 |
| 6.60941E-08 | 1.01634E-06 |
| 6.64385E-08 | 1.02102E-06 |
| 6.66716E-08 | 1.02399E-06 |
| 6.73184E-08 | 1.0333E-06  |
| 6.75594E-08 | 1.03638E-06 |
| 6.78027E-08 | 1.03949E-06 |
| 6.79839E-08 | 1.04165E-06 |
| 6.81655E-08 | 1.04381E-06 |
| 6.85337E-08 | 1.04882E-06 |
| 6.8967E-08  | 1.05469E-06 |
| 6.89999E-08 | 1.05469E-06 |
| 6.91251E-08 | 1.05598E-06 |
| 6.9191E-08  | 1.05636E-06 |
| 6.9627E-08  | 1.06238E-06 |

## TAUvsControls

|             |             |
|-------------|-------------|
| 7.00862E-08 | 1.0686E-06  |
| 7.0118E-08  | 1.0686E-06  |
| 7.07495E-08 | 1.07759E-06 |
| 7.09297E-08 | 1.07969E-06 |
| 7.12306E-08 | 1.08363E-06 |
| 7.14709E-08 | 1.08664E-06 |
| 7.16757E-08 | 1.08911E-06 |
| 7.17652E-08 | 1.08972E-06 |
| 7.18011E-08 | 1.08972E-06 |
| 7.21495E-08 | 1.09436E-06 |
| 7.25121E-08 | 1.09921E-06 |
| 7.26191E-08 | 1.10008E-06 |
| 7.2655E-08  | 1.10008E-06 |
| 7.31224E-08 | 1.1065E-06  |
| 7.35649E-08 | 1.11254E-06 |
| 7.36419E-08 | 1.11269E-06 |
| 7.3662E-08  | 1.11269E-06 |
| 7.38082E-08 | 1.11425E-06 |
| 7.39486E-08 | 1.11571E-06 |
| 7.39945E-08 | 1.11575E-06 |
| 7.43904E-08 | 1.12106E-06 |
| 7.45626E-08 | 1.12299E-06 |
| 7.46959E-08 | 1.12434E-06 |
| 7.47536E-08 | 1.12455E-06 |
| 7.52427E-08 | 1.13124E-06 |
| 7.53708E-08 | 1.1325E-06  |
| 7.64642E-08 | 1.14826E-06 |
| 7.69157E-08 | 1.15436E-06 |
| 7.70384E-08 | 1.15553E-06 |
| 7.76578E-08 | 1.16414E-06 |
| 7.7783E-08  | 1.16534E-06 |
| 7.79049E-08 | 1.16648E-06 |
| 7.80373E-08 | 1.16778E-06 |
| 7.82133E-08 | 1.16973E-06 |
| 7.86059E-08 | 1.17492E-06 |
| 7.89073E-08 | 1.17874E-06 |
| 7.9108E-08  | 1.18105E-06 |
| 7.96464E-08 | 1.18839E-06 |
| 7.96934E-08 | 1.1884E-06  |
| 8.02278E-08 | 1.19568E-06 |
| 8.03637E-08 | 1.19701E-06 |
| 8.0512E-08  | 1.19852E-06 |
| 8.06385E-08 | 1.19931E-06 |
| 8.07065E-08 | 1.19931E-06 |
| 8.07439E-08 | 1.19931E-06 |
| 8.0752E-08  | 1.19931E-06 |
| 8.08871E-08 | 1.20062E-06 |
| 8.11105E-08 | 1.20324E-06 |
| 8.16513E-08 | 1.21024E-06 |
| 8.1677E-08  | 1.21024E-06 |
| 8.17882E-08 | 1.21119E-06 |

## TAUvsControls

|             |             |
|-------------|-------------|
| 8.18594E-08 | 1.21155E-06 |
| 8.22109E-08 | 1.21605E-06 |
| 8.23984E-08 | 1.21812E-06 |
| 8.26829E-08 | 1.22162E-06 |
| 8.28631E-08 | 1.22358E-06 |
| 8.40196E-08 | 1.23994E-06 |
| 8.44083E-08 | 1.24496E-06 |
| 8.46141E-08 | 1.24728E-06 |
| 8.54026E-08 | 1.25818E-06 |
| 8.59185E-08 | 1.26505E-06 |
| 8.64311E-08 | 1.27187E-06 |
| 8.67098E-08 | 1.27524E-06 |
| 8.68956E-08 | 1.27724E-06 |
| 8.71178E-08 | 1.27977E-06 |
| 8.72955E-08 | 1.28165E-06 |
| 8.77754E-08 | 1.28796E-06 |
| 8.81506E-08 | 1.29272E-06 |
| 8.88811E-08 | 1.30269E-06 |
| 8.92649E-08 | 1.30757E-06 |
| 8.93875E-08 | 1.30862E-06 |
| 8.94425E-08 | 1.30868E-06 |
| 8.9817E-08  | 1.31341E-06 |
| 8.99866E-08 | 1.31514E-06 |
| 9.06303E-08 | 1.32379E-06 |
| 9.06944E-08 | 1.32397E-06 |
| 9.09826E-08 | 1.32743E-06 |
| 9.16387E-08 | 1.33624E-06 |
| 9.194E-08   | 1.33987E-06 |
| 9.20257E-08 | 1.34036E-06 |
| 9.28137E-08 | 1.35107E-06 |
| 9.35191E-08 | 1.36056E-06 |
| 9.42974E-08 | 1.37111E-06 |
| 9.44969E-08 | 1.37323E-06 |
| 9.5054E-08  | 1.38054E-06 |
| 9.52062E-08 | 1.38155E-06 |
| 9.5231E-08  | 1.38155E-06 |
| 9.60477E-08 | 1.39261E-06 |
| 9.61252E-08 | 1.39295E-06 |
| 9.62928E-08 | 1.39459E-06 |
| 9.64486E-08 | 1.39606E-06 |
| 9.65927E-08 | 1.39735E-06 |
| 9.69694E-08 | 1.40201E-06 |
| 9.73745E-08 | 1.40708E-06 |
| 9.74476E-08 | 1.40734E-06 |
| 9.78933E-08 | 1.41298E-06 |
| 9.92403E-08 | 1.43162E-06 |
| 9.93898E-08 | 1.43244E-06 |
| 9.94091E-08 | 1.43244E-06 |
| 9.96722E-08 | 1.43495E-06 |
| 9.96954E-08 | 1.43495E-06 |
| 9.97838E-08 | 1.43542E-06 |

## TAUvsControls

|             |             |
|-------------|-------------|
| 1.00149E-07 | 1.43987E-06 |
| 1.00742E-07 | 1.44758E-06 |
| 1.01305E-07 | 1.45486E-06 |
| 1.01395E-07 | 1.45534E-06 |
| 1.01688E-07 | 1.45872E-06 |
| 1.02055E-07 | 1.46307E-06 |
| 1.02105E-07 | 1.46307E-06 |
| 1.02228E-07 | 1.46401E-06 |
| 1.02362E-07 | 1.46511E-06 |
| 1.02752E-07 | 1.46987E-06 |
| 1.0355E-07  | 1.48046E-06 |
| 1.03665E-07 | 1.48075E-06 |
| 1.03686E-07 | 1.48075E-06 |
| 1.04517E-07 | 1.49101E-06 |
| 1.0452E-07  | 1.49101E-06 |
| 1.05814E-07 | 1.50862E-06 |
| 1.06153E-07 | 1.51262E-06 |
| 1.06452E-07 | 1.51604E-06 |
| 1.06524E-07 | 1.51622E-06 |
| 1.0665E-07  | 1.51718E-06 |
| 1.07167E-07 | 1.52368E-06 |
| 1.073E-07   | 1.52473E-06 |
| 1.07796E-07 | 1.53094E-06 |
| 1.08285E-07 | 1.53703E-06 |
| 1.08779E-07 | 1.54318E-06 |
| 1.09166E-07 | 1.54781E-06 |
| 1.10238E-07 | 1.56215E-06 |
| 1.11093E-07 | 1.5734E-06  |
| 1.11843E-07 | 1.58314E-06 |
| 1.12279E-07 | 1.58845E-06 |
| 1.12386E-07 | 1.58908E-06 |
| 1.12616E-07 | 1.59145E-06 |
| 1.13917E-07 | 1.60895E-06 |
| 1.14998E-07 | 1.62333E-06 |
| 1.16499E-07 | 1.64361E-06 |
| 1.17435E-07 | 1.65591E-06 |
| 1.17732E-07 | 1.65918E-06 |
| 1.18116E-07 | 1.66368E-06 |
| 1.18258E-07 | 1.66421E-06 |
| 1.18283E-07 | 1.66421E-06 |
| 1.19356E-07 | 1.67838E-06 |
| 1.20519E-07 | 1.69294E-06 |
| 1.20523E-07 | 1.69294E-06 |
| 1.20661E-07 | 1.69394E-06 |
| 1.20747E-07 | 1.69423E-06 |
| 1.20914E-07 | 1.69564E-06 |
| 1.21288E-07 | 1.69996E-06 |
| 1.24232E-07 | 1.74027E-06 |
| 1.24382E-07 | 1.74141E-06 |
| 1.25386E-07 | 1.75406E-06 |
| 1.25422E-07 | 1.75406E-06 |

## TAUvsControls

|             |             |
|-------------|-------------|
| 1.2581E-07  | 1.75853E-06 |
| 1.2618E-07  | 1.76275E-06 |
| 1.2634E-07  | 1.76402E-06 |
| 1.26546E-07 | 1.76593E-06 |
| 1.27432E-07 | 1.77733E-06 |
| 1.27999E-07 | 1.78426E-06 |
| 1.28188E-07 | 1.78587E-06 |
| 1.28253E-07 | 1.78587E-06 |
| 1.28786E-07 | 1.79232E-06 |
| 1.30096E-07 | 1.80956E-06 |
| 1.30247E-07 | 1.81068E-06 |
| 1.30626E-07 | 1.81497E-06 |
| 1.31068E-07 | 1.82012E-06 |
| 1.31253E-07 | 1.82058E-06 |
| 1.31326E-07 | 1.82058E-06 |
| 1.31366E-07 | 1.82058E-06 |
| 1.31385E-07 | 1.82058E-06 |
| 1.32073E-07 | 1.82912E-06 |
| 1.32453E-07 | 1.8334E-06  |
| 1.3294E-07  | 1.83914E-06 |
| 1.34919E-07 | 1.86552E-06 |
| 1.35794E-07 | 1.87661E-06 |
| 1.36456E-07 | 1.88474E-06 |
| 1.37929E-07 | 1.90406E-06 |
| 1.38536E-07 | 1.91141E-06 |
| 1.39081E-07 | 1.9179E-06  |
| 1.39391E-07 | 1.92085E-06 |
| 1.39445E-07 | 1.92085E-06 |
| 1.39912E-07 | 1.92625E-06 |
| 1.40151E-07 | 1.9285E-06  |
| 1.40426E-07 | 1.93125E-06 |
| 1.40967E-07 | 1.93765E-06 |
| 1.4117E-07  | 1.93941E-06 |
| 1.41742E-07 | 1.94621E-06 |
| 1.43819E-07 | 1.97369E-06 |
| 1.44293E-07 | 1.97913E-06 |
| 1.45517E-07 | 1.99486E-06 |
| 1.4678E-07  | 2.01109E-06 |
| 1.47325E-07 | 2.01749E-06 |
| 1.48079E-07 | 2.02672E-06 |
| 1.48465E-07 | 2.03092E-06 |
| 1.48892E-07 | 2.03567E-06 |
| 1.49538E-07 | 2.04343E-06 |
| 1.49688E-07 | 2.04438E-06 |
| 1.50333E-07 | 2.0521E-06  |
| 1.51085E-07 | 2.06127E-06 |
| 1.51874E-07 | 2.07093E-06 |
| 1.52498E-07 | 2.07833E-06 |
| 1.52742E-07 | 2.08055E-06 |
| 1.53914E-07 | 2.09541E-06 |
| 1.54305E-07 | 2.09961E-06 |

## TAUvsControls

|             |             |
|-------------|-------------|
| 1.56497E-07 | 2.12831E-06 |
| 1.56798E-07 | 2.13128E-06 |
| 1.57915E-07 | 2.14533E-06 |
| 1.58027E-07 | 2.1457E-06  |
| 1.58216E-07 | 2.14714E-06 |
| 1.59998E-07 | 2.17017E-06 |
| 1.60273E-07 | 2.17275E-06 |
| 1.60451E-07 | 2.17401E-06 |
| 1.62203E-07 | 2.19659E-06 |
| 1.63571E-07 | 2.21334E-06 |
| 1.63612E-07 | 2.21334E-06 |
| 1.63733E-07 | 2.21364E-06 |
| 1.63807E-07 | 2.21364E-06 |
| 1.64834E-07 | 2.22634E-06 |
| 1.65998E-07 | 2.24088E-06 |
| 1.66859E-07 | 2.25132E-06 |
| 1.67726E-07 | 2.26183E-06 |
| 1.69764E-07 | 2.28811E-06 |
| 1.71406E-07 | 2.30877E-06 |
| 1.71476E-07 | 2.30877E-06 |
| 1.73607E-07 | 2.33623E-06 |
| 1.73767E-07 | 2.33715E-06 |
| 1.74108E-07 | 2.34051E-06 |
| 1.74782E-07 | 2.34835E-06 |
| 1.75201E-07 | 2.35274E-06 |
| 1.77028E-07 | 2.37603E-06 |
| 1.77566E-07 | 2.3817E-06  |
| 1.77636E-07 | 2.3817E-06  |
| 1.78078E-07 | 2.38638E-06 |
| 1.78562E-07 | 2.39161E-06 |
| 1.79497E-07 | 2.40288E-06 |
| 1.80372E-07 | 2.41333E-06 |
| 1.80538E-07 | 2.41429E-06 |
| 1.81188E-07 | 2.42173E-06 |
| 1.82263E-07 | 2.43483E-06 |
| 1.83743E-07 | 2.45332E-06 |
| 1.85163E-07 | 2.47099E-06 |
| 1.86619E-07 | 2.48913E-06 |
| 1.86798E-07 | 2.49022E-06 |
| 1.8805E-07  | 2.50512E-06 |
| 1.88111E-07 | 2.50512E-06 |
| 1.88212E-07 | 2.50517E-06 |
| 1.88902E-07 | 2.51305E-06 |
| 1.90223E-07 | 2.52931E-06 |
| 1.91816E-07 | 2.54917E-06 |
| 1.92792E-07 | 2.56061E-06 |
| 1.92877E-07 | 2.56061E-06 |
| 1.93028E-07 | 2.56129E-06 |
| 1.95669E-07 | 2.59499E-06 |
| 1.95779E-07 | 2.59511E-06 |
| 1.96147E-07 | 2.59864E-06 |

## TAUvsControls

|             |             |
|-------------|-------------|
| 1.98408E-07 | 2.62724E-06 |
| 1.99445E-07 | 2.6396E-06  |
| 1.99826E-07 | 2.64329E-06 |
| 2.00436E-07 | 2.64999E-06 |
| 2.01024E-07 | 2.6564E-06  |
| 2.01318E-07 | 2.65836E-06 |
| 2.0138E-07  | 2.65836E-06 |
| 2.02096E-07 | 2.66644E-06 |
| 2.03675E-07 | 2.6859E-06  |
| 2.04354E-07 | 2.69347E-06 |
| 2.05475E-07 | 2.70684E-06 |
| 2.06696E-07 | 2.72153E-06 |
| 2.07007E-07 | 2.72342E-06 |
| 2.07052E-07 | 2.72342E-06 |
| 2.07389E-07 | 2.72645E-06 |
| 2.08571E-07 | 2.74059E-06 |
| 2.09378E-07 | 2.74978E-06 |
| 2.10181E-07 | 2.75892E-06 |
| 2.10398E-07 | 2.76036E-06 |
| 2.10529E-07 | 2.76066E-06 |
| 2.12194E-07 | 2.78107E-06 |
| 2.13811E-07 | 2.80083E-06 |
| 2.14168E-07 | 2.80408E-06 |
| 2.15716E-07 | 2.82291E-06 |
| 2.1658E-07  | 2.83277E-06 |
| 2.19347E-07 | 2.86684E-06 |
| 2.19409E-07 | 2.86684E-06 |
| 2.20774E-07 | 2.88321E-06 |
| 2.21685E-07 | 2.89364E-06 |
| 2.25939E-07 | 2.94767E-06 |
| 2.26248E-07 | 2.9502E-06  |
| 2.26654E-07 | 2.95399E-06 |
| 2.27015E-07 | 2.95719E-06 |
| 2.27215E-07 | 2.95721E-06 |
| 2.27247E-07 | 2.95721E-06 |
| 2.29047E-07 | 2.97912E-06 |
| 2.29913E-07 | 2.98887E-06 |
| 2.32007E-07 | 3.01456E-06 |
| 2.32238E-07 | 3.01604E-06 |
| 2.32486E-07 | 3.01773E-06 |
| 2.33457E-07 | 3.0288E-06  |
| 2.34818E-07 | 3.04491E-06 |
| 2.35656E-07 | 3.05424E-06 |
| 2.35833E-07 | 3.055E-06   |
| 2.36312E-07 | 3.05964E-06 |
| 2.37545E-07 | 3.07407E-06 |
| 2.38547E-07 | 3.08547E-06 |
| 2.3921E-07  | 3.09249E-06 |
| 2.42246E-07 | 3.13017E-06 |
| 2.43034E-07 | 3.13876E-06 |
| 2.43404E-07 | 3.14196E-06 |

## TAUvsControls

|             |             |
|-------------|-------------|
| 2.43604E-07 | 3.14295E-06 |
| 2.43759E-07 | 3.14338E-06 |
| 2.45258E-07 | 3.16112E-06 |
| 2.46469E-07 | 3.17513E-06 |
| 2.46897E-07 | 3.17785E-06 |
| 2.46928E-07 | 3.17785E-06 |
| 2.47224E-07 | 3.18006E-06 |
| 2.4933E-07  | 3.20554E-06 |
| 2.51032E-07 | 3.22565E-06 |
| 2.51145E-07 | 3.22565E-06 |
| 2.51374E-07 | 3.22698E-06 |
| 2.51756E-07 | 3.23026E-06 |
| 2.52543E-07 | 3.23874E-06 |
| 2.53075E-07 | 3.24394E-06 |
| 2.54657E-07 | 3.2613E-06  |
| 2.54684E-07 | 3.2613E-06  |
| 2.57135E-07 | 3.29105E-06 |
| 2.57733E-07 | 3.29706E-06 |
| 2.59124E-07 | 3.31319E-06 |
| 2.60139E-07 | 3.32325E-06 |
| 2.6017E-07  | 3.32325E-06 |
| 2.60418E-07 | 3.32476E-06 |
| 2.6116E-07  | 3.33258E-06 |
| 2.618E-07   | 3.33909E-06 |
| 2.6207E-07  | 3.33988E-06 |
| 2.62122E-07 | 3.33988E-06 |
| 2.63025E-07 | 3.34972E-06 |
| 2.64161E-07 | 3.36252E-06 |
| 2.67334E-07 | 3.40122E-06 |
| 2.67559E-07 | 3.40239E-06 |
| 2.67767E-07 | 3.40335E-06 |
| 2.67994E-07 | 3.40455E-06 |
| 2.68916E-07 | 3.41457E-06 |
| 2.70515E-07 | 3.43317E-06 |
| 2.70798E-07 | 3.43506E-06 |
| 2.71235E-07 | 3.4389E-06  |
| 2.72158E-07 | 3.4489E-06  |
| 2.72535E-07 | 3.45197E-06 |
| 2.73217E-07 | 3.45891E-06 |
| 2.74499E-07 | 3.47343E-06 |
| 2.74876E-07 | 3.47647E-06 |
| 2.77987E-07 | 3.51409E-06 |
| 2.78155E-07 | 3.51448E-06 |
| 2.80414E-07 | 3.54128E-06 |
| 2.80971E-07 | 3.54657E-06 |
| 2.81402E-07 | 3.55026E-06 |
| 2.821E-07   | 3.55732E-06 |
| 2.83159E-07 | 3.56891E-06 |
| 2.835E-07   | 3.57146E-06 |
| 2.84356E-07 | 3.58049E-06 |
| 2.85993E-07 | 3.59933E-06 |



## TAUvsControls

|             |             |
|-------------|-------------|
| 2.87403E-07 | 3.6153E-06  |
| 2.91352E-07 | 3.66318E-06 |
| 2.91721E-07 | 3.66602E-06 |
| 2.9309E-07  | 3.68142E-06 |
| 2.94424E-07 | 3.69637E-06 |
| 2.95391E-07 | 3.70669E-06 |
| 2.95853E-07 | 3.71068E-06 |
| 2.96748E-07 | 3.72008E-06 |
| 2.98915E-07 | 3.74541E-06 |
| 2.99363E-07 | 3.7492E-06  |
| 3.01977E-07 | 3.7801E-06  |
| 3.02636E-07 | 3.7865E-06  |
| 3.02949E-07 | 3.78856E-06 |
| 3.06163E-07 | 3.82689E-06 |
| 3.06573E-07 | 3.83015E-06 |
| 3.06943E-07 | 3.83291E-06 |
| 3.09089E-07 | 3.85782E-06 |
| 3.0972E-07  | 3.86382E-06 |
| 3.09891E-07 | 3.86407E-06 |
| 3.13916E-07 | 3.91235E-06 |
| 3.15736E-07 | 3.93313E-06 |
| 3.17678E-07 | 3.95352E-06 |
| 3.17681E-07 | 3.95352E-06 |
| 3.17874E-07 | 3.954E-06   |
| 3.18787E-07 | 3.96344E-06 |
| 3.23288E-07 | 4.01745E-06 |
| 3.24369E-07 | 4.02892E-06 |
| 3.24969E-07 | 4.03443E-06 |
| 3.25484E-07 | 4.03712E-06 |
| 3.25501E-07 | 4.03712E-06 |
| 3.25678E-07 | 4.03737E-06 |
| 3.26119E-07 | 4.04088E-06 |
| 3.29372E-07 | 4.07922E-06 |
| 3.33437E-07 | 4.12757E-06 |
| 3.34404E-07 | 4.13755E-06 |
| 3.34791E-07 | 4.14034E-06 |
| 3.35404E-07 | 4.14591E-06 |
| 3.37727E-07 | 4.17262E-06 |
| 3.39366E-07 | 4.18987E-06 |
| 3.3945E-07  | 4.18987E-06 |
| 3.40538E-07 | 4.20082E-06 |
| 3.40664E-07 | 4.20082E-06 |
| 3.40951E-07 | 4.20184E-06 |
| 3.41075E-07 | 4.20184E-06 |
| 3.45463E-07 | 4.25305E-06 |
| 3.45563E-07 | 4.25305E-06 |
| 3.46256E-07 | 4.25952E-06 |
| 3.46691E-07 | 4.26284E-06 |
| 3.48069E-07 | 4.27773E-06 |
| 3.50992E-07 | 4.31158E-06 |
| 3.54221E-07 | 4.34917E-06 |

## TAUvsControls

|             |             |
|-------------|-------------|
| 3.56476E-07 | 4.37477E-06 |
| 3.57993E-07 | 4.39128E-06 |
| 3.60034E-07 | 4.41421E-06 |
| 3.6162E-07  | 4.43153E-06 |
| 3.62453E-07 | 4.43962E-06 |
| 3.64022E-07 | 4.4567E-06  |
| 3.64261E-07 | 4.45751E-06 |
| 3.65271E-07 | 4.46647E-06 |
| 3.65442E-07 | 4.46647E-06 |
| 3.65594E-07 | 4.46647E-06 |
| 3.6569E-07  | 4.46647E-06 |
| 3.66086E-07 | 4.46917E-06 |
| 3.663E-07   | 4.46966E-06 |
| 3.6693E-07  | 4.47523E-06 |
| 3.67405E-07 | 4.47888E-06 |
| 3.67829E-07 | 4.48089E-06 |
| 3.67919E-07 | 4.48089E-06 |
| 3.69376E-07 | 4.4965E-06  |
| 3.70411E-07 | 4.50696E-06 |
| 3.71448E-07 | 4.51743E-06 |
| 3.77215E-07 | 4.5854E-06  |
| 3.77936E-07 | 4.59198E-06 |
| 3.8154E-07  | 4.63358E-06 |
| 3.82116E-07 | 4.63838E-06 |
| 3.82974E-07 | 4.64659E-06 |
| 3.83524E-07 | 4.65107E-06 |
| 3.8706E-07  | 4.69174E-06 |
| 3.87547E-07 | 4.69542E-06 |
| 3.88035E-07 | 4.69911E-06 |
| 3.88785E-07 | 4.70597E-06 |
| 3.90916E-07 | 4.72953E-06 |
| 3.91325E-07 | 4.73225E-06 |
| 3.92837E-07 | 4.74829E-06 |
| 3.95681E-07 | 4.78041E-06 |
| 3.96384E-07 | 4.78665E-06 |
| 3.99617E-07 | 4.82342E-06 |
| 4.02424E-07 | 4.85503E-06 |
| 4.02765E-07 | 4.85685E-06 |
| 4.05559E-07 | 4.88825E-06 |
| 4.06717E-07 | 4.8999E-06  |
| 4.06947E-07 | 4.90037E-06 |
| 4.10025E-07 | 4.93511E-06 |
| 4.11494E-07 | 4.95048E-06 |
| 4.11992E-07 | 4.95414E-06 |
| 4.15281E-07 | 4.99135E-06 |
| 4.17378E-07 | 5.01421E-06 |
| 4.18565E-07 | 5.02611E-06 |
| 4.22539E-07 | 5.07145E-06 |
| 4.25556E-07 | 5.10527E-06 |
| 4.26411E-07 | 5.11315E-06 |
| 4.28584E-07 | 5.1368E-06  |

## TAUvsControls

|             |             |
|-------------|-------------|
| 4.28919E-07 | 5.13841E-06 |
| 4.29489E-07 | 5.13997E-06 |
| 4.29586E-07 | 5.13997E-06 |
| 4.2965E-07  | 5.13997E-06 |
| 4.31099E-07 | 5.1549E-06  |
| 4.32457E-07 | 5.16873E-06 |
| 4.3636E-07  | 5.21294E-06 |
| 4.37729E-07 | 5.22687E-06 |
| 4.39598E-07 | 5.24674E-06 |
| 4.41224E-07 | 5.2637E-06  |
| 4.44014E-07 | 5.29276E-06 |
| 4.44234E-07 | 5.29276E-06 |
| 4.44279E-07 | 5.29276E-06 |
| 4.47456E-07 | 5.32814E-06 |
| 4.49565E-07 | 5.35076E-06 |
| 4.58715E-07 | 5.45713E-06 |
| 4.62789E-07 | 5.50305E-06 |
| 4.65681E-07 | 5.53353E-06 |
| 4.65784E-07 | 5.53353E-06 |
| 4.67187E-07 | 5.54763E-06 |
| 4.69486E-07 | 5.57231E-06 |
| 4.69894E-07 | 5.57231E-06 |
| 4.69917E-07 | 5.57231E-06 |
| 4.70387E-07 | 5.5753E-06  |
| 4.72245E-07 | 5.59474E-06 |
| 4.7311E-07  | 5.6024E-06  |
| 4.73757E-07 | 5.60748E-06 |
| 4.7669E-07  | 5.63528E-06 |
| 4.7671E-07  | 5.63528E-06 |
| 4.76765E-07 | 5.63528E-06 |
| 4.79457E-07 | 5.66448E-06 |
| 4.82809E-07 | 5.70146E-06 |
| 4.83548E-07 | 5.70756E-06 |
| 4.84156E-07 | 5.7121E-06  |
| 4.84726E-07 | 5.7162E-06  |
| 4.85635E-07 | 5.72419E-06 |
| 4.8585E-07  | 5.72419E-06 |
| 4.90238E-07 | 5.77324E-06 |
| 4.90486E-07 | 5.77351E-06 |
| 4.91741E-07 | 5.78562E-06 |
| 4.92155E-07 | 5.78615E-06 |
| 4.92237E-07 | 5.78615E-06 |
| 4.93589E-07 | 5.79939E-06 |
| 4.95251E-07 | 5.81625E-06 |
| 4.97033E-07 | 5.83451E-06 |
| 4.98348E-07 | 5.84727E-06 |
| 5.00045E-07 | 5.8645E-06  |
| 5.03588E-07 | 5.90335E-06 |
| 5.04416E-07 | 5.91035E-06 |
| 5.06854E-07 | 5.93621E-06 |
| 5.08063E-07 | 5.94765E-06 |

## TAUvsControls

|             |             |
|-------------|-------------|
| 5.13476E-07 | 6.00828E-06 |
| 5.15599E-07 | 6.03036E-06 |
| 5.21907E-07 | 6.10136E-06 |
| 5.2325E-07  | 6.11427E-06 |
| 5.30333E-07 | 6.19422E-06 |
| 5.33317E-07 | 6.22624E-06 |
| 5.34431E-07 | 6.23283E-06 |
| 5.34451E-07 | 6.23283E-06 |
| 5.34798E-07 | 6.23283E-06 |
| 5.34854E-07 | 6.23283E-06 |
| 5.35302E-07 | 6.23522E-06 |
| 5.38797E-07 | 6.27308E-06 |
| 5.42897E-07 | 6.31796E-06 |
| 5.46238E-07 | 6.35394E-06 |
| 5.46929E-07 | 6.3591E-06  |
| 5.51489E-07 | 6.40653E-06 |
| 5.51508E-07 | 6.40653E-06 |
| 5.52077E-07 | 6.41024E-06 |
| 5.56891E-07 | 6.46321E-06 |
| 5.60318E-07 | 6.50005E-06 |
| 5.61009E-07 | 6.50512E-06 |
| 5.63356E-07 | 6.52938E-06 |
| 5.70078E-07 | 6.60431E-06 |
| 5.71546E-07 | 6.61833E-06 |
| 5.72572E-07 | 6.62721E-06 |
| 5.73006E-07 | 6.62924E-06 |
| 5.7598E-07  | 6.66065E-06 |
| 5.7624E-07  | 6.66065E-06 |
| 5.79492E-07 | 6.69522E-06 |
| 5.86148E-07 | 6.76907E-06 |
| 5.92866E-07 | 6.84357E-06 |
| 5.93764E-07 | 6.85085E-06 |
| 5.9516E-07  | 6.86388E-06 |
| 5.95937E-07 | 6.86975E-06 |
| 6.00019E-07 | 6.9137E-06  |
| 6.01941E-07 | 6.93272E-06 |
| 6.06924E-07 | 6.98699E-06 |
| 6.08245E-07 | 6.99905E-06 |
| 6.09012E-07 | 7.00473E-06 |
| 6.10069E-07 | 7.01375E-06 |
| 6.1796E-07  | 7.10128E-06 |
| 6.258E-07   | 7.18816E-06 |
| 6.26769E-07 | 7.19606E-06 |
| 6.27316E-07 | 7.19912E-06 |
| 6.30812E-07 | 7.23601E-06 |
| 6.31743E-07 | 7.24344E-06 |
| 6.32205E-07 | 7.2455E-06  |
| 6.32661E-07 | 7.24748E-06 |
| 6.34466E-07 | 7.26492E-06 |
| 6.37382E-07 | 7.29505E-06 |
| 6.39565E-07 | 7.31677E-06 |

## TAUvsControls

|             |             |
|-------------|-------------|
| 6.45493E-07 | 7.37801E-06 |
| 6.45493E-07 | 7.37801E-06 |
| 6.45961E-07 | 7.38007E-06 |
| 6.49244E-07 | 7.41427E-06 |
| 6.50354E-07 | 7.42365E-06 |
| 6.52232E-07 | 7.44177E-06 |
| 6.54127E-07 | 7.46007E-06 |
| 6.60447E-07 | 7.52812E-06 |
| 6.60681E-07 | 7.52812E-06 |
| 6.61403E-07 | 7.533E-06   |
| 6.63451E-07 | 7.55297E-06 |
| 6.69769E-07 | 7.61889E-06 |
| 6.69835E-07 | 7.61889E-06 |
| 6.71244E-07 | 7.63153E-06 |
| 6.73903E-07 | 7.65837E-06 |
| 6.75133E-07 | 7.66895E-06 |
| 6.81912E-07 | 7.74252E-06 |
| 6.85526E-07 | 7.78012E-06 |
| 6.86948E-07 | 7.79281E-06 |
| 6.91035E-07 | 7.83475E-06 |
| 6.91461E-07 | 7.83475E-06 |
| 6.91562E-07 | 7.83475E-06 |
| 6.95404E-07 | 7.8748E-06  |
| 6.95993E-07 | 7.87799E-06 |
| 6.9815E-07  | 7.89892E-06 |
| 7.02183E-07 | 7.94105E-06 |
| 7.1679E-07  | 8.10267E-06 |
| 7.19327E-07 | 8.12776E-06 |
| 7.2322E-07  | 8.16815E-06 |
| 7.24468E-07 | 8.17865E-06 |
| 7.26456E-07 | 8.19747E-06 |
| 7.35014E-07 | 8.2904E-06  |
| 7.3975E-07  | 8.34015E-06 |
| 7.44351E-07 | 8.38834E-06 |
| 7.45538E-07 | 8.39803E-06 |
| 7.46635E-07 | 8.40475E-06 |
| 7.46969E-07 | 8.40475E-06 |
| 7.47118E-07 | 8.40475E-06 |
| 7.47914E-07 | 8.41002E-06 |
| 7.4904E-07  | 8.41898E-06 |
| 7.59398E-07 | 8.53166E-06 |
| 7.6024E-07  | 8.53739E-06 |
| 7.6346E-07  | 8.5698E-06  |
| 7.67211E-07 | 8.60814E-06 |
| 7.6889E-07  | 8.6232E-06  |
| 7.75741E-07 | 8.69291E-06 |
| 7.76117E-07 | 8.69291E-06 |
| 7.76123E-07 | 8.69291E-06 |
| 7.7697E-07  | 8.69861E-06 |
| 7.80601E-07 | 8.73544E-06 |
| 7.83217E-07 | 8.76089E-06 |

## TAUvsControls

|             |             |
|-------------|-------------|
| 7.83564E-07 | 8.76096E-06 |
| 7.84519E-07 | 8.76781E-06 |
| 7.8498E-07  | 8.76914E-06 |
| 7.88134E-07 | 8.80055E-06 |
| 7.89837E-07 | 8.81572E-06 |
| 7.96137E-07 | 8.88217E-06 |
| 7.98427E-07 | 8.90385E-06 |
| 7.98923E-07 | 8.9055E-06  |
| 8.00546E-07 | 8.9182E-06  |
| 8.00757E-07 | 8.9182E-06  |
| 8.05738E-07 | 8.96978E-06 |
| 8.06455E-07 | 8.97386E-06 |
| 8.2033E-07  | 9.1243E-06  |
| 8.20902E-07 | 9.1267E-06  |
| 8.23107E-07 | 9.14726E-06 |
| 8.24555E-07 | 9.15938E-06 |
| 8.25659E-07 | 9.1673E-06  |
| 8.26204E-07 | 9.1673E-06  |
| 8.2634E-07  | 9.1673E-06  |
| 8.28997E-07 | 9.1928E-06  |
| 8.41081E-07 | 9.32277E-06 |
| 8.45353E-07 | 9.36608E-06 |
| 8.4898E-07  | 9.4022E-06  |
| 8.50125E-07 | 9.41081E-06 |
| 8.53662E-07 | 9.44589E-06 |
| 8.60488E-07 | 9.51731E-06 |
| 8.62877E-07 | 9.53962E-06 |
| 8.69888E-07 | 9.61299E-06 |
| 8.72369E-07 | 9.63626E-06 |
| 8.73835E-07 | 9.6483E-06  |
| 8.77638E-07 | 9.68612E-06 |
| 8.78409E-07 | 9.69045E-06 |
| 8.79914E-07 | 9.70289E-06 |
| 8.8237E-07  | 9.72579E-06 |
| 8.8317E-07  | 9.73042E-06 |
| 8.86237E-07 | 9.76003E-06 |
| 8.89815E-07 | 9.79522E-06 |
| 8.90876E-07 | 9.80269E-06 |
| 8.91942E-07 | 9.81021E-06 |
| 8.94754E-07 | 9.83693E-06 |
| 8.98859E-07 | 9.87782E-06 |
| 9.01515E-07 | 9.90276E-06 |
| 9.04263E-07 | 9.9287E-06  |
| 9.07681E-07 | 9.96196E-06 |
| 9.11173E-07 | 9.99602E-06 |
| 9.14044E-07 | 1.00232E-05 |
| 9.15927E-07 | 1.00393E-05 |
| 9.16296E-07 | 1.00393E-05 |
| 9.22717E-07 | 1.01054E-05 |
| 9.33171E-07 | 1.02135E-05 |
| 9.33384E-07 | 1.02135E-05 |

## TAUvsControls

|             |             |
|-------------|-------------|
| 9.36058E-07 | 1.02384E-05 |
| 9.36567E-07 | 1.02396E-05 |
| 9.37738E-07 | 1.0248E-05  |
| 9.38591E-07 | 1.0253E-05  |
| 9.48289E-07 | 1.03538E-05 |
| 9.48631E-07 | 1.03538E-05 |
| 9.53063E-07 | 1.03977E-05 |
| 9.54129E-07 | 1.0405E-05  |
| 9.54591E-07 | 1.04056E-05 |
| 9.59716E-07 | 1.0457E-05  |
| 9.61471E-07 | 1.04717E-05 |
| 9.64231E-07 | 1.04973E-05 |
| 9.6621E-07  | 1.05143E-05 |
| 9.67731E-07 | 1.05255E-05 |
| 9.68053E-07 | 1.05255E-05 |
| 9.70515E-07 | 1.05478E-05 |
| 9.71801E-07 | 1.05573E-05 |
| 9.73699E-07 | 1.05734E-05 |
| 9.75862E-07 | 1.05916E-05 |
| 9.76202E-07 | 1.05916E-05 |
| 9.78707E-07 | 1.06143E-05 |
| 9.80415E-07 | 1.06283E-05 |
| 9.85812E-07 | 1.06792E-05 |
| 9.85938E-07 | 1.06792E-05 |
| 9.88134E-07 | 1.06985E-05 |
| 9.88974E-07 | 1.06994E-05 |
| 9.89165E-07 | 1.06994E-05 |
| 9.89469E-07 | 1.06994E-05 |
| 9.90276E-07 | 1.07036E-05 |
| 9.94916E-07 | 1.07492E-05 |
| 9.95407E-07 | 1.075E-05   |
| 9.96401E-07 | 1.07562E-05 |
| 1.00665E-06 | 1.08622E-05 |
| 1.0074E-06  | 1.08658E-05 |
| 1.01446E-06 | 1.09374E-05 |
| 1.01729E-06 | 1.09632E-05 |
| 1.01959E-06 | 1.09834E-05 |
| 1.02264E-06 | 1.10116E-05 |
| 1.02622E-06 | 1.10456E-05 |
| 1.02876E-06 | 1.10682E-05 |
| 1.02973E-06 | 1.1074E-05  |
| 1.03138E-06 | 1.10842E-05 |
| 1.03155E-06 | 1.10842E-05 |
| 1.03249E-06 | 1.10898E-05 |
| 1.03336E-06 | 1.10945E-05 |
| 1.0369E-06  | 1.11219E-05 |
| 1.037E-06   | 1.11219E-05 |
| 1.03722E-06 | 1.11219E-05 |
| 1.04061E-06 | 1.11536E-05 |
| 1.04529E-06 | 1.11991E-05 |
| 1.04676E-06 | 1.12102E-05 |

## TAUvsControls

|             |             |
|-------------|-------------|
| 1.04989E-06 | 1.1239E-05  |
| 1.05359E-06 | 1.12739E-05 |
| 1.05437E-06 | 1.12775E-05 |
| 1.05604E-06 | 1.12907E-05 |
| 1.05781E-06 | 1.13049E-05 |
| 1.06227E-06 | 1.13478E-05 |
| 1.0631E-06  | 1.1352E-05  |
| 1.06587E-06 | 1.13768E-05 |
| 1.0728E-06  | 1.1446E-05  |
| 1.07362E-06 | 1.145E-05   |
| 1.08051E-06 | 1.15187E-05 |
| 1.08494E-06 | 1.15596E-05 |
| 1.08525E-06 | 1.15596E-05 |
| 1.08578E-06 | 1.15604E-05 |
| 1.09162E-06 | 1.16179E-05 |
| 1.09501E-06 | 1.16491E-05 |
| 1.10369E-06 | 1.17366E-05 |
| 1.11294E-06 | 1.183E-05   |
| 1.11453E-06 | 1.1842E-05  |
| 1.12534E-06 | 1.19519E-05 |
| 1.13169E-06 | 1.20144E-05 |
| 1.13267E-06 | 1.20198E-05 |
| 1.13585E-06 | 1.20485E-05 |
| 1.14076E-06 | 1.20956E-05 |
| 1.14558E-06 | 1.214E-05   |
| 1.14589E-06 | 1.214E-05   |
| 1.14786E-06 | 1.21559E-05 |
| 1.14948E-06 | 1.2168E-05  |
| 1.15672E-06 | 1.22395E-05 |
| 1.15886E-06 | 1.22572E-05 |
| 1.16268E-06 | 1.22916E-05 |
| 1.16308E-06 | 1.22916E-05 |
| 1.17065E-06 | 1.23665E-05 |
| 1.17497E-06 | 1.24071E-05 |
| 1.17621E-06 | 1.24151E-05 |
| 1.1771E-06  | 1.24194E-05 |
| 1.17798E-06 | 1.24235E-05 |
| 1.17847E-06 | 1.24236E-05 |
| 1.1804E-06  | 1.24388E-05 |
| 1.18637E-06 | 1.24966E-05 |
| 1.18917E-06 | 1.2521E-05  |
| 1.20126E-06 | 1.26431E-05 |
| 1.20562E-06 | 1.26838E-05 |
| 1.21023E-06 | 1.27251E-05 |
| 1.21054E-06 | 1.27251E-05 |
| 1.21522E-06 | 1.27691E-05 |
| 1.21816E-06 | 1.27947E-05 |
| 1.22335E-06 | 1.28439E-05 |
| 1.23613E-06 | 1.29728E-05 |
| 1.24467E-06 | 1.30571E-05 |
| 1.24525E-06 | 1.30578E-05 |



## TAUvsControls

|             |             |
|-------------|-------------|
| 1.24603E-06 | 1.30606E-05 |
| 1.27008E-06 | 1.33073E-05 |
| 1.27359E-06 | 1.33387E-05 |
| 1.27804E-06 | 1.33786E-05 |
| 1.27848E-06 | 1.33786E-05 |
| 1.27898E-06 | 1.33786E-05 |
| 1.28047E-06 | 1.33888E-05 |
| 1.29039E-06 | 1.3487E-05  |
| 1.29513E-06 | 1.3531E-05  |
| 1.30005E-06 | 1.35769E-05 |
| 1.3016E-06  | 1.35876E-05 |
| 1.308E-06   | 1.36441E-05 |
| 1.30808E-06 | 1.36441E-05 |
| 1.3089E-06  | 1.36472E-05 |
| 1.31117E-06 | 1.36653E-05 |
| 1.32283E-06 | 1.37784E-05 |
| 1.3231E-06  | 1.37784E-05 |
| 1.3239E-06  | 1.37811E-05 |
| 1.32496E-06 | 1.37866E-05 |
| 1.33484E-06 | 1.38838E-05 |
| 1.33898E-06 | 1.39212E-05 |
| 1.33958E-06 | 1.39218E-05 |
| 1.34146E-06 | 1.39326E-05 |
| 1.34171E-06 | 1.39326E-05 |
| 1.34461E-06 | 1.39571E-05 |
| 1.3481E-06  | 1.39877E-05 |
| 1.3528E-06  | 1.40307E-05 |
| 1.35598E-06 | 1.4058E-05  |
| 1.36948E-06 | 1.41922E-05 |
| 1.37086E-06 | 1.42009E-05 |
| 1.37391E-06 | 1.42267E-05 |
| 1.37865E-06 | 1.427E-05   |
| 1.3821E-06  | 1.42999E-05 |
| 1.3904E-06  | 1.438E-05   |
| 1.39299E-06 | 1.44009E-05 |
| 1.39561E-06 | 1.44223E-05 |
| 1.39717E-06 | 1.44326E-05 |
| 1.40359E-06 | 1.4493E-05  |
| 1.40648E-06 | 1.4517E-05  |
| 1.41204E-06 | 1.45685E-05 |
| 1.41645E-06 | 1.4605E-05  |
| 1.41671E-06 | 1.4605E-05  |
| 1.42049E-06 | 1.4638E-05  |
| 1.42271E-06 | 1.4655E-05  |
| 1.42898E-06 | 1.47137E-05 |
| 1.43116E-06 | 1.47302E-05 |
| 1.4377E-06  | 1.47888E-05 |
| 1.438E-06   | 1.47888E-05 |
| 1.44465E-06 | 1.48512E-05 |
| 1.45209E-06 | 1.49217E-05 |
| 1.46208E-06 | 1.50184E-05 |

## TAUvsControls

|             |             |
|-------------|-------------|
| 1.46922E-06 | 1.50856E-05 |
| 1.47441E-06 | 1.51318E-05 |
| 1.47489E-06 | 1.51318E-05 |
| 1.47935E-06 | 1.51714E-05 |
| 1.48046E-06 | 1.51767E-05 |
| 1.49196E-06 | 1.52886E-05 |
| 1.49587E-06 | 1.53225E-05 |
| 1.50158E-06 | 1.53743E-05 |
| 1.50212E-06 | 1.53743E-05 |
| 1.51002E-06 | 1.5449E-05  |
| 1.5167E-06  | 1.55061E-05 |
| 1.51682E-06 | 1.55061E-05 |
| 1.51935E-06 | 1.55258E-05 |
| 1.52016E-06 | 1.55279E-05 |
| 1.52528E-06 | 1.5574E-05  |
| 1.53222E-06 | 1.56386E-05 |
| 1.53331E-06 | 1.56436E-05 |
| 1.53664E-06 | 1.56713E-05 |
| 1.54026E-06 | 1.5702E-05  |
| 1.54861E-06 | 1.57808E-05 |
| 1.55423E-06 | 1.58318E-05 |
| 1.55496E-06 | 1.5833E-05  |
| 1.55691E-06 | 1.58465E-05 |
| 1.5616E-06  | 1.5888E-05  |
| 1.56242E-06 | 1.589E-05   |
| 1.56411E-06 | 1.59009E-05 |
| 1.57987E-06 | 1.60547E-05 |
| 1.58622E-06 | 1.61129E-05 |
| 1.58884E-06 | 1.61331E-05 |
| 1.58951E-06 | 1.61335E-05 |
| 1.5908E-06  | 1.61402E-05 |
| 1.59638E-06 | 1.61904E-05 |
| 1.60025E-06 | 1.62232E-05 |
| 1.60898E-06 | 1.63053E-05 |
| 1.60963E-06 | 1.63055E-05 |
| 1.61311E-06 | 1.63245E-05 |
| 1.61341E-06 | 1.63245E-05 |
| 1.61342E-06 | 1.63245E-05 |
| 1.61504E-06 | 1.63345E-05 |
| 1.61658E-06 | 1.63435E-05 |
| 1.61886E-06 | 1.63602E-05 |
| 1.62111E-06 | 1.63765E-05 |
| 1.62209E-06 | 1.63799E-05 |
| 1.6229E-06  | 1.63817E-05 |
| 1.63347E-06 | 1.64819E-05 |
| 1.63941E-06 | 1.65353E-05 |
| 1.66044E-06 | 1.67408E-05 |
| 1.66269E-06 | 1.67569E-05 |
| 1.66353E-06 | 1.67571E-05 |
| 1.66402E-06 | 1.67571E-05 |
| 1.68695E-06 | 1.69814E-05 |

## TAUvsControls

|             |             |
|-------------|-------------|
| 1.69452E-06 | 1.70462E-05 |
| 1.69472E-06 | 1.70462E-05 |
| 1.70583E-06 | 1.71512E-05 |
| 1.71081E-06 | 1.71946E-05 |
| 1.71225E-06 | 1.72023E-05 |
| 1.71518E-06 | 1.7225E-05  |
| 1.71672E-06 | 1.72337E-05 |
| 1.75759E-06 | 1.76333E-05 |
| 1.7579E-06  | 1.76333E-05 |
| 1.75947E-06 | 1.76422E-05 |
| 1.76114E-06 | 1.7652E-05  |
| 1.76975E-06 | 1.77314E-05 |
| 1.77197E-06 | 1.77466E-05 |
| 1.78572E-06 | 1.78775E-05 |
| 1.79016E-06 | 1.79149E-05 |
| 1.79607E-06 | 1.7967E-05  |
| 1.80206E-06 | 1.80199E-05 |
| 1.80412E-06 | 1.80335E-05 |
| 1.80595E-06 | 1.80447E-05 |
| 1.80998E-06 | 1.8078E-05  |
| 1.81521E-06 | 1.8121E-05  |
| 1.8157E-06  | 1.8121E-05  |
| 1.82046E-06 | 1.81614E-05 |
| 1.82504E-06 | 1.82E-05    |
| 1.82578E-06 | 1.82003E-05 |
| 1.84563E-06 | 1.83874E-05 |
| 1.84598E-06 | 1.83874E-05 |
| 1.85646E-06 | 1.84846E-05 |
| 1.85792E-06 | 1.84919E-05 |
| 1.86301E-06 | 1.85355E-05 |
| 1.86653E-06 | 1.85633E-05 |
| 1.88109E-06 | 1.86987E-05 |
| 1.88165E-06 | 1.86987E-05 |
| 1.88234E-06 | 1.86987E-05 |
| 1.88383E-06 | 1.87036E-05 |
| 1.88429E-06 | 1.87036E-05 |
| 1.88526E-06 | 1.8706E-05  |
| 1.89123E-06 | 1.87577E-05 |
| 1.89193E-06 | 1.87577E-05 |
| 1.89887E-06 | 1.88192E-05 |
| 1.90099E-06 | 1.8833E-05  |
| 1.90194E-06 | 1.88351E-05 |
| 1.91024E-06 | 1.891E-05   |
| 1.91206E-06 | 1.89207E-05 |
| 1.91441E-06 | 1.89367E-05 |
| 1.92203E-06 | 1.90047E-05 |
| 1.92326E-06 | 1.90095E-05 |
| 1.93208E-06 | 1.90894E-05 |
| 1.94129E-06 | 1.9173E-05  |
| 1.95359E-06 | 1.9287E-05  |
| 1.96793E-06 | 1.94211E-05 |

## TAUvsControls

|             |             |
|-------------|-------------|
| 1.97381E-06 | 1.94716E-05 |
| 1.97503E-06 | 1.94762E-05 |
| 1.97792E-06 | 1.94972E-05 |
| 1.99308E-06 | 1.9639E-05  |
| 1.99952E-06 | 1.9695E-05  |
| 2.00362E-06 | 1.97277E-05 |
| 2.0266E-06  | 1.99464E-05 |
| 2.03476E-06 | 2.0019E-05  |
| 2.05021E-06 | 2.01633E-05 |
| 2.05506E-06 | 2.02033E-05 |
| 2.0623E-06  | 2.02666E-05 |
| 2.06993E-06 | 2.03339E-05 |
| 2.08022E-06 | 2.04271E-05 |
| 2.08172E-06 | 2.04307E-05 |
| 2.08218E-06 | 2.04307E-05 |
| 2.08402E-06 | 2.04409E-05 |
| 2.09332E-06 | 2.05243E-05 |
| 2.09965E-06 | 2.05785E-05 |
| 2.11687E-06 | 2.07394E-05 |
| 2.12217E-06 | 2.07834E-05 |
| 2.13776E-06 | 2.0928E-05  |
| 2.14012E-06 | 2.09431E-05 |
| 2.15057E-06 | 2.10337E-05 |
| 2.15101E-06 | 2.10337E-05 |
| 2.15626E-06 | 2.10769E-05 |
| 2.15868E-06 | 2.10925E-05 |
| 2.1621E-06  | 2.11114E-05 |
| 2.16225E-06 | 2.11114E-05 |
| 2.16958E-06 | 2.11749E-05 |
| 2.17257E-06 | 2.11959E-05 |
| 2.17854E-06 | 2.12462E-05 |
| 2.18351E-06 | 2.12865E-05 |
| 2.1937E-06  | 2.13778E-05 |
| 2.19462E-06 | 2.13786E-05 |
| 2.20596E-06 | 2.14808E-05 |
| 2.21561E-06 | 2.15667E-05 |
| 2.23118E-06 | 2.171E-05   |
| 2.25086E-06 | 2.18867E-05 |
| 2.25105E-06 | 2.18867E-05 |
| 2.25652E-06 | 2.19316E-05 |
| 2.26138E-06 | 2.19705E-05 |
| 2.27301E-06 | 2.20751E-05 |
| 2.2747E-06  | 2.20832E-05 |
| 2.29854E-06 | 2.23062E-05 |
| 2.3333E-06  | 2.2635E-05  |
| 2.3378E-06  | 2.26701E-05 |
| 2.34401E-06 | 2.27217E-05 |
| 2.34904E-06 | 2.27618E-05 |
| 2.3532E-06  | 2.27935E-05 |
| 2.37713E-06 | 2.30166E-05 |
| 2.38123E-06 | 2.30476E-05 |

## TAUvsControls

|             |             |
|-------------|-------------|
| 2.38828E-06 | 2.31071E-05 |
| 2.39142E-06 | 2.31288E-05 |
| 2.39648E-06 | 2.3169E-05  |
| 2.41639E-06 | 2.33527E-05 |
| 2.42203E-06 | 2.33983E-05 |
| 2.43079E-06 | 2.34742E-05 |
| 2.43515E-06 | 2.35049E-05 |
| 2.43581E-06 | 2.35049E-05 |
| 2.46276E-06 | 2.37561E-05 |
| 2.46717E-06 | 2.37897E-05 |
| 2.47506E-06 | 2.38568E-05 |
| 2.47696E-06 | 2.38661E-05 |
| 2.48387E-06 | 2.39237E-05 |
| 2.49084E-06 | 2.39818E-05 |
| 2.49416E-06 | 2.40048E-05 |
| 2.49779E-06 | 2.40272E-05 |
| 2.49837E-06 | 2.40272E-05 |
| 2.50547E-06 | 2.40865E-05 |
| 2.5132E-06  | 2.41444E-05 |
| 2.51338E-06 | 2.41444E-05 |
| 2.51509E-06 | 2.41519E-05 |
| 2.53118E-06 | 2.42972E-05 |
| 2.53954E-06 | 2.43684E-05 |
| 2.55793E-06 | 2.45357E-05 |
| 2.56096E-06 | 2.45556E-05 |
| 2.57245E-06 | 2.46565E-05 |
| 2.58956E-06 | 2.48112E-05 |
| 2.597E-06   | 2.48632E-05 |
| 2.59713E-06 | 2.48632E-05 |
| 2.5979E-06  | 2.48632E-05 |
| 2.60401E-06 | 2.49125E-05 |
| 2.6079E-06  | 2.49404E-05 |
| 2.6174E-06  | 2.50219E-05 |
| 2.61962E-06 | 2.50338E-05 |
| 2.62231E-06 | 2.50501E-05 |
| 2.63663E-06 | 2.51776E-05 |
| 2.63807E-06 | 2.51819E-05 |
| 2.65775E-06 | 2.53603E-05 |
| 2.66773E-06 | 2.54461E-05 |
| 2.66904E-06 | 2.54492E-05 |
| 2.67797E-06 | 2.55248E-05 |
| 2.68766E-06 | 2.56077E-05 |
| 2.68977E-06 | 2.56183E-05 |
| 2.69291E-06 | 2.56387E-05 |
| 2.69515E-06 | 2.56504E-05 |
| 2.69702E-06 | 2.56587E-05 |
| 2.70323E-06 | 2.57083E-05 |
| 2.70458E-06 | 2.57116E-05 |
| 2.70865E-06 | 2.57407E-05 |
| 2.70966E-06 | 2.57407E-05 |
| 2.71192E-06 | 2.57527E-05 |

## TAUvsControls

|             |             |
|-------------|-------------|
| 2.72975E-06 | 2.59124E-05 |
| 2.73504E-06 | 2.59459E-05 |
| 2.7353E-06  | 2.59459E-05 |
| 2.73778E-06 | 2.59598E-05 |
| 2.74794E-06 | 2.60465E-05 |
| 2.75283E-06 | 2.60833E-05 |
| 2.75727E-06 | 2.61157E-05 |
| 2.76087E-06 | 2.61401E-05 |
| 2.76326E-06 | 2.61531E-05 |
| 2.79069E-06 | 2.6403E-05  |
| 2.79301E-06 | 2.64151E-05 |
| 2.8002E-06  | 2.64734E-05 |
| 2.82337E-06 | 2.66826E-05 |
| 2.83647E-06 | 2.67965E-05 |
| 2.84707E-06 | 2.68868E-05 |
| 2.84933E-06 | 2.68933E-05 |
| 2.84986E-06 | 2.68933E-05 |
| 2.85332E-06 | 2.69161E-05 |
| 2.85757E-06 | 2.69463E-05 |
| 2.86963E-06 | 2.705E-05   |
| 2.87586E-06 | 2.70988E-05 |
| 2.88017E-06 | 2.71294E-05 |
| 2.90525E-06 | 2.73556E-05 |
| 2.922E-06   | 2.75032E-05 |
| 2.92599E-06 | 2.75284E-05 |
| 2.92682E-06 | 2.75284E-05 |
| 2.93324E-06 | 2.75787E-05 |
| 2.97928E-06 | 2.80013E-05 |
| 2.98241E-06 | 2.80204E-05 |
| 2.99215E-06 | 2.81016E-05 |
| 2.99465E-06 | 2.81148E-05 |
| 3.00386E-06 | 2.8191E-05  |
| 3.00812E-06 | 2.82207E-05 |
| 3.01534E-06 | 2.82781E-05 |
| 3.03073E-06 | 2.8412E-05  |
| 3.0373E-06  | 2.84607E-05 |
| 3.03815E-06 | 2.84607E-05 |
| 3.04161E-06 | 2.84827E-05 |
| 3.09497E-06 | 2.89719E-05 |
| 3.09812E-06 | 2.89907E-05 |
| 3.10913E-06 | 2.90832E-05 |
| 3.13257E-06 | 2.92918E-05 |
| 3.13377E-06 | 2.92923E-05 |
| 3.14996E-06 | 2.94329E-05 |
| 3.15312E-06 | 2.94517E-05 |
| 3.18299E-06 | 2.97199E-05 |
| 3.18853E-06 | 2.97608E-05 |
| 3.21479E-06 | 2.99949E-05 |
| 3.2222E-06  | 3.00531E-05 |
| 3.22395E-06 | 3.00586E-05 |
| 3.23488E-06 | 3.01495E-05 |

## TAUvsControls

|             |             |
|-------------|-------------|
| 3.23631E-06 | 3.01519E-05 |
| 3.32093E-06 | 3.09291E-05 |
| 3.33532E-06 | 3.10517E-05 |
| 3.34817E-06 | 3.11601E-05 |
| 3.35732E-06 | 3.1234E-05  |
| 3.35856E-06 | 3.12341E-05 |
| 3.36788E-06 | 3.13095E-05 |
| 3.40569E-06 | 3.16494E-05 |
| 3.42565E-06 | 3.18234E-05 |
| 3.4328E-06  | 3.18783E-05 |
| 3.43492E-06 | 3.18864E-05 |
| 3.45361E-06 | 3.20484E-05 |
| 3.46468E-06 | 3.21394E-05 |
| 3.46768E-06 | 3.21557E-05 |
| 3.47764E-06 | 3.22363E-05 |
| 3.48118E-06 | 3.22562E-05 |
| 3.48286E-06 | 3.22562E-05 |
| 3.48355E-06 | 3.22562E-05 |
| 3.5182E-06  | 3.25653E-05 |
| 3.52707E-06 | 3.26356E-05 |
| 3.53354E-06 | 3.26836E-05 |
| 3.55172E-06 | 3.284E-05   |
| 3.55484E-06 | 3.28569E-05 |
| 3.56793E-06 | 3.29661E-05 |
| 3.57035E-06 | 3.29766E-05 |
| 3.57269E-06 | 3.29863E-05 |
| 3.57402E-06 | 3.29867E-05 |
| 3.59487E-06 | 3.31506E-05 |
| 3.59544E-06 | 3.31506E-05 |
| 3.59566E-06 | 3.31506E-05 |
| 3.6049E-06  | 3.32239E-05 |
| 3.65528E-06 | 3.36761E-05 |
| 3.67489E-06 | 3.38446E-05 |
| 3.67893E-06 | 3.38696E-05 |
| 3.68632E-06 | 3.39255E-05 |
| 3.69959E-06 | 3.40354E-05 |
| 3.72786E-06 | 3.42833E-05 |
| 3.73984E-06 | 3.43708E-05 |
| 3.74086E-06 | 3.43708E-05 |
| 3.7414E-06  | 3.43708E-05 |
| 3.75209E-06 | 3.44534E-05 |
| 3.75308E-06 | 3.44534E-05 |
| 3.76967E-06 | 3.45933E-05 |
| 3.77808E-06 | 3.46581E-05 |
| 3.78337E-06 | 3.46942E-05 |
| 3.78627E-06 | 3.47083E-05 |
| 3.79714E-06 | 3.47956E-05 |
| 3.82571E-06 | 3.50449E-05 |
| 3.83766E-06 | 3.51418E-05 |
| 3.84357E-06 | 3.51621E-05 |
| 3.84479E-06 | 3.51621E-05 |

TAUvsControls

|             |             |
|-------------|-------------|
| 3.8448E-06  | 3.51621E-05 |
| 3.84536E-06 | 3.51621E-05 |
| 3.85284E-06 | 3.52074E-05 |
| 3.85306E-06 | 3.52074E-05 |
| 3.85778E-06 | 3.52379E-05 |
| 3.86414E-06 | 3.52835E-05 |
| 3.87039E-06 | 3.5328E-05  |
| 3.91075E-06 | 3.56837E-05 |
| 3.92329E-06 | 3.57854E-05 |
| 3.93395E-06 | 3.58698E-05 |
| 3.94357E-06 | 3.59448E-05 |
| 3.95199E-06 | 3.60088E-05 |
| 3.95543E-06 | 3.60273E-05 |
| 3.96294E-06 | 3.60829E-05 |
| 3.96481E-06 | 3.60871E-05 |
| 4.02045E-06 | 3.65805E-05 |
| 4.06443E-06 | 3.69676E-05 |
| 4.07E-06    | 3.70051E-05 |
| 4.08387E-06 | 3.71181E-05 |
| 4.11799E-06 | 3.74149E-05 |
| 4.12161E-06 | 3.74345E-05 |
| 4.14289E-06 | 3.76145E-05 |
| 4.14774E-06 | 3.76452E-05 |
| 4.16459E-06 | 3.77847E-05 |
| 4.17268E-06 | 3.78448E-05 |
| 4.18798E-06 | 3.79702E-05 |
| 4.19414E-06 | 3.80126E-05 |
| 4.19917E-06 | 3.80447E-05 |
| 4.20407E-06 | 3.80756E-05 |
| 4.20747E-06 | 3.80892E-05 |
| 4.20854E-06 | 3.80892E-05 |
| 4.23654E-06 | 3.83291E-05 |
| 4.23873E-06 | 3.83354E-05 |
| 4.25316E-06 | 3.84523E-05 |
| 4.27324E-06 | 3.86203E-05 |
| 4.3112E-06  | 3.89497E-05 |
| 4.31586E-06 | 3.8978E-05  |
| 4.31917E-06 | 3.89942E-05 |
| 4.33319E-06 | 3.9107E-05  |
| 4.39729E-06 | 3.96715E-05 |
| 4.39999E-06 | 3.96819E-05 |
| 4.40297E-06 | 3.96948E-05 |
| 4.4152E-06  | 3.97675E-05 |
| 4.41541E-06 | 3.97675E-05 |
| 4.41569E-06 | 3.97675E-05 |
| 4.42299E-06 | 3.98193E-05 |
| 4.43894E-06 | 3.99296E-05 |
| 4.43931E-06 | 3.99296E-05 |
| 4.44027E-06 | 3.99296E-05 |
| 4.44146E-06 | 3.99296E-05 |
| 4.47226E-06 | 4.01924E-05 |



## TAUvsControls

|             |             |
|-------------|-------------|
| 4.4759E-06  | 4.0211E-05  |
| 4.48452E-06 | 4.02743E-05 |
| 4.4945E-06  | 4.03498E-05 |
| 4.50976E-06 | 4.04726E-05 |
| 4.53089E-06 | 4.0648E-05  |
| 4.58967E-06 | 4.1161E-05  |
| 4.60337E-06 | 4.12606E-05 |
| 4.60399E-06 | 4.12606E-05 |
| 4.61441E-06 | 4.13395E-05 |
| 4.6187E-06  | 4.13546E-05 |
| 4.61932E-06 | 4.13546E-05 |
| 4.65659E-06 | 4.16737E-05 |
| 4.67135E-06 | 4.17913E-05 |
| 4.68935E-06 | 4.19376E-05 |
| 4.74353E-06 | 4.24074E-05 |
| 4.75815E-06 | 4.25232E-05 |
| 4.76347E-06 | 4.25555E-05 |
| 4.76507E-06 | 4.25555E-05 |
| 4.78516E-06 | 4.272E-05   |
| 4.79286E-06 | 4.27738E-05 |
| 4.80706E-06 | 4.28857E-05 |
| 4.82556E-06 | 4.30357E-05 |
| 4.86454E-06 | 4.33683E-05 |
| 4.8893E-06  | 4.35739E-05 |
| 4.90484E-06 | 4.36972E-05 |
| 4.91159E-06 | 4.37422E-05 |
| 4.91852E-06 | 4.37887E-05 |
| 4.92622E-06 | 4.3842E-05  |
| 4.9512E-06  | 4.4049E-05  |
| 4.95752E-06 | 4.40747E-05 |
| 4.95752E-06 | 4.40747E-05 |
| 4.97212E-06 | 4.41892E-05 |
| 4.98176E-06 | 4.42595E-05 |
| 4.99434E-06 | 4.43559E-05 |
| 5.00262E-06 | 4.44069E-05 |
| 5.00355E-06 | 4.44069E-05 |
| 5.00915E-06 | 4.44413E-05 |
| 5.01705E-06 | 4.44698E-05 |
| 5.01774E-06 | 4.44698E-05 |
| 5.01798E-06 | 4.44698E-05 |
| 5.0193E-06  | 4.44698E-05 |
| 5.02316E-06 | 4.44886E-05 |
| 5.05051E-06 | 4.47154E-05 |
| 5.05475E-06 | 4.47375E-05 |
| 5.06123E-06 | 4.47794E-05 |
| 5.08203E-06 | 4.49479E-05 |
| 5.10355E-06 | 4.51227E-05 |
| 5.16015E-06 | 4.55848E-05 |
| 5.16022E-06 | 4.55848E-05 |
| 5.16115E-06 | 4.55848E-05 |
| 5.17674E-06 | 4.57067E-05 |

## TAUvsControls

|             |             |
|-------------|-------------|
| 5.18883E-06 | 4.57977E-05 |
| 5.1963E-06  | 4.58479E-05 |
| 5.22993E-06 | 4.61288E-05 |
| 5.24052E-06 | 4.62063E-05 |
| 5.30534E-06 | 4.67617E-05 |
| 5.30796E-06 | 4.67687E-05 |
| 5.31674E-06 | 4.68301E-05 |
| 5.33105E-06 | 4.694E-05   |
| 5.33379E-06 | 4.69479E-05 |
| 5.34926E-06 | 4.7068E-05  |
| 5.36811E-06 | 4.72176E-05 |
| 5.38894E-06 | 4.73847E-05 |
| 5.41411E-06 | 4.75896E-05 |
| 5.42678E-06 | 4.76847E-05 |
| 5.45086E-06 | 4.78798E-05 |
| 5.45904E-06 | 4.79352E-05 |
| 5.50094E-06 | 4.82866E-05 |
| 5.52737E-06 | 4.85021E-05 |
| 5.54137E-06 | 4.86083E-05 |
| 5.54778E-06 | 4.86478E-05 |
| 5.58336E-06 | 4.89431E-05 |
| 5.58911E-06 | 4.89659E-05 |
| 5.58978E-06 | 4.89659E-05 |
| 5.5941E-06  | 4.8987E-05  |
| 5.59975E-06 | 4.90198E-05 |
| 5.62094E-06 | 4.91885E-05 |
| 5.65408E-06 | 4.94616E-05 |
| 5.65943E-06 | 4.94915E-05 |
| 5.6618E-06  | 4.94954E-05 |
| 5.6663E-06  | 4.94957E-05 |
| 5.66662E-06 | 4.94957E-05 |
| 5.66762E-06 | 4.94957E-05 |
| 5.71313E-06 | 4.98762E-05 |
| 5.73366E-06 | 5.00383E-05 |
| 5.76561E-06 | 5.03E-05    |
| 5.84635E-06 | 5.09871E-05 |
| 5.84965E-06 | 5.09985E-05 |
| 5.8616E-06  | 5.10681E-05 |
| 5.86161E-06 | 5.10681E-05 |
| 5.87007E-06 | 5.11244E-05 |
| 5.88714E-06 | 5.12557E-05 |
| 5.92648E-06 | 5.15807E-05 |
| 5.9551E-06  | 5.18122E-05 |
| 6.00356E-06 | 5.22106E-05 |
| 6.00496E-06 | 5.22106E-05 |
| 6.02304E-06 | 5.23479E-05 |
| 6.02483E-06 | 5.23479E-05 |
| 6.0279E-06  | 5.23568E-05 |
| 6.05747E-06 | 5.2579E-05  |
| 6.05759E-06 | 5.2579E-05  |
| 6.06028E-06 | 5.25846E-05 |

## TAUvsControls

|             |             |
|-------------|-------------|
| 6.06754E-06 | 5.26298E-05 |
| 6.08842E-06 | 5.27931E-05 |
| 6.09538E-06 | 5.28356E-05 |
| 6.11997E-06 | 5.30308E-05 |
| 6.15747E-06 | 5.33377E-05 |
| 6.16357E-06 | 5.33725E-05 |
| 6.1696E-06  | 5.34067E-05 |
| 6.20426E-06 | 5.36886E-05 |
| 6.22697E-06 | 5.3867E-05  |
| 6.25969E-06 | 5.41318E-05 |
| 6.26759E-06 | 5.41818E-05 |
| 6.31234E-06 | 5.45502E-05 |
| 6.3306E-06  | 5.46897E-05 |
| 6.36217E-06 | 5.49439E-05 |
| 6.39602E-06 | 5.52176E-05 |
| 6.42312E-06 | 5.54329E-05 |
| 6.43894E-06 | 5.55508E-05 |
| 6.44264E-06 | 5.5564E-05  |
| 6.45638E-06 | 5.56637E-05 |
| 6.47962E-06 | 5.58454E-05 |
| 6.50729E-06 | 5.6065E-05  |
| 6.51682E-06 | 5.61283E-05 |
| 6.57548E-06 | 5.66145E-05 |
| 6.59085E-06 | 5.67278E-05 |
| 6.60661E-06 | 5.68444E-05 |
| 6.62555E-06 | 5.69882E-05 |
| 6.6292E-06  | 5.70005E-05 |
| 6.63347E-06 | 5.70181E-05 |
| 6.65515E-06 | 5.71852E-05 |
| 6.67615E-06 | 5.73465E-05 |
| 6.69045E-06 | 5.74501E-05 |
| 6.69759E-06 | 5.74921E-05 |
| 6.70497E-06 | 5.75363E-05 |
| 6.71381E-06 | 5.75928E-05 |
| 6.73255E-06 | 5.77343E-05 |
| 6.74328E-06 | 5.78031E-05 |
| 6.74514E-06 | 5.78031E-05 |
| 6.74734E-06 | 5.78031E-05 |
| 6.75581E-06 | 5.78563E-05 |
| 6.80006E-06 | 5.82158E-05 |
| 6.8419E-06  | 5.85545E-05 |
| 6.86967E-06 | 5.87726E-05 |
| 6.89225E-06 | 5.89461E-05 |
| 6.90603E-06 | 5.90443E-05 |
| 6.92209E-06 | 5.91618E-05 |
| 6.94577E-06 | 5.93444E-05 |
| 6.99075E-06 | 5.97089E-05 |
| 7.01592E-06 | 5.99039E-05 |
| 7.02588E-06 | 5.99689E-05 |
| 7.03091E-06 | 5.99919E-05 |
| 7.06864E-06 | 6.02938E-05 |

## TAUvsControls

|             |             |
|-------------|-------------|
| 7.07619E-06 | 6.03382E-05 |
| 7.14728E-06 | 6.09241E-05 |
| 7.16332E-06 | 6.10405E-05 |
| 7.1697E-06  | 6.10746E-05 |
| 7.1889E-06  | 6.12178E-05 |
| 7.19447E-06 | 6.12449E-05 |
| 7.2151E-06  | 6.14002E-05 |
| 7.2451E-06  | 6.1635E-05  |
| 7.26067E-06 | 6.1747E-05  |
| 7.28989E-06 | 6.19749E-05 |
| 7.29574E-06 | 6.20041E-05 |
| 7.32676E-06 | 6.22368E-05 |
| 7.32797E-06 | 6.22368E-05 |
| 7.33293E-06 | 6.22583E-05 |
| 7.33574E-06 | 6.22615E-05 |
| 7.34678E-06 | 6.23347E-05 |
| 7.35727E-06 | 6.2403E-05  |
| 7.40499E-06 | 6.2787E-05  |
| 7.41188E-06 | 6.28246E-05 |
| 7.4219E-06  | 6.28887E-05 |
| 7.42658E-06 | 6.29076E-05 |
| 7.48671E-06 | 6.3396E-05  |
| 7.55999E-06 | 6.39954E-05 |
| 7.56727E-06 | 6.4036E-05  |
| 7.59173E-06 | 6.42218E-05 |
| 7.59562E-06 | 6.42335E-05 |
| 7.62674E-06 | 6.44753E-05 |
| 7.67481E-06 | 6.48604E-05 |
| 7.71341E-06 | 6.51651E-05 |
| 7.72433E-06 | 6.52359E-05 |
| 7.7313E-06  | 6.52733E-05 |
| 7.7784E-06  | 6.56493E-05 |
| 7.79136E-06 | 6.5737E-05  |
| 7.83925E-06 | 6.61194E-05 |
| 7.88153E-06 | 6.64541E-05 |
| 7.88489E-06 | 6.64606E-05 |
| 7.88785E-06 | 6.64637E-05 |
| 7.89744E-06 | 6.65227E-05 |
| 7.9054E-06  | 6.65678E-05 |
| 7.92558E-06 | 6.67158E-05 |
| 7.94366E-06 | 6.68461E-05 |
| 7.96895E-06 | 6.7037E-05  |
| 7.98788E-06 | 6.71567E-05 |
| 7.98842E-06 | 6.71567E-05 |
| 7.99684E-06 | 6.72054E-05 |
| 8.01946E-06 | 6.73735E-05 |
| 8.03699E-06 | 6.74986E-05 |
| 8.05431E-06 | 6.76219E-05 |
| 8.05898E-06 | 6.7639E-05  |
| 8.07363E-06 | 6.77398E-05 |
| 8.12166E-06 | 6.81205E-05 |

## TAUvsControls

|             |             |
|-------------|-------------|
| 8.12964E-06 | 6.81651E-05 |
| 8.13597E-06 | 6.81959E-05 |
| 8.14453E-06 | 6.82454E-05 |
| 8.1529E-06  | 6.82932E-05 |
| 8.18556E-06 | 6.85444E-05 |
| 8.21361E-06 | 6.87568E-05 |
| 8.22133E-06 | 6.8799E-05  |
| 8.25984E-06 | 6.90987E-05 |
| 8.26831E-06 | 6.9147E-05  |
| 8.28786E-06 | 6.92826E-05 |
| 8.28992E-06 | 6.92826E-05 |
| 8.30446E-06 | 6.93815E-05 |
| 8.36061E-06 | 6.98278E-05 |
| 8.39704E-06 | 7.01092E-05 |
| 8.41566E-06 | 7.023E-05   |
| 8.41697E-06 | 7.023E-05   |
| 8.43168E-06 | 7.03298E-05 |
| 8.4655E-06  | 7.05889E-05 |
| 8.48878E-06 | 7.07601E-05 |
| 8.51975E-06 | 7.09952E-05 |
| 8.5589E-06  | 7.12982E-05 |
| 8.62603E-06 | 7.18341E-05 |
| 8.63405E-06 | 7.18776E-05 |
| 8.66025E-06 | 7.20723E-05 |
| 8.67697E-06 | 7.2188E-05  |
| 8.68129E-06 | 7.22005E-05 |
| 8.69786E-06 | 7.23148E-05 |
| 8.74137E-06 | 7.26531E-05 |
| 8.74846E-06 | 7.26884E-05 |
| 8.75443E-06 | 7.27145E-05 |
| 8.83213E-06 | 7.33361E-05 |
| 8.85831E-06 | 7.35297E-05 |
| 8.89265E-06 | 7.37701E-05 |
| 8.89302E-06 | 7.37701E-05 |
| 8.92685E-06 | 7.40135E-05 |
| 8.92813E-06 | 7.40135E-05 |
| 8.99423E-06 | 7.45373E-05 |
| 9.00061E-06 | 7.45661E-05 |
| 9.00378E-06 | 7.45683E-05 |
| 9.01008E-06 | 7.45964E-05 |
| 9.02772E-06 | 7.47183E-05 |
| 9.04776E-06 | 7.486E-05   |
| 9.07051E-06 | 7.5024E-05  |
| 9.08299E-06 | 7.5103E-05  |
| 9.09804E-06 | 7.52033E-05 |
| 9.14867E-06 | 7.55974E-05 |
| 9.15924E-06 | 7.56603E-05 |
| 9.17461E-06 | 7.57588E-05 |
| 9.17986E-06 | 7.57588E-05 |
| 9.18002E-06 | 7.57588E-05 |
| 9.18401E-06 | 7.57673E-05 |

## TAUvsControls

|             |             |
|-------------|-------------|
| 9.2048E-06  | 7.59144E-05 |
| 9.236E-06   | 7.61472E-05 |
| 9.25024E-06 | 7.62402E-05 |
| 9.26014E-06 | 7.62972E-05 |
| 9.26359E-06 | 7.63012E-05 |
| 9.28659E-06 | 7.64661E-05 |
| 9.34564E-06 | 7.69276E-05 |
| 9.40998E-06 | 7.74323E-05 |
| 9.4403E-06  | 7.76569E-05 |
| 9.46844E-06 | 7.78634E-05 |
| 9.4862E-06  | 7.79844E-05 |
| 9.55478E-06 | 7.85231E-05 |
| 9.5773E-06  | 7.86829E-05 |
| 9.58341E-06 | 7.87079E-05 |
| 9.60895E-06 | 7.88924E-05 |
| 9.62899E-06 | 7.90317E-05 |
| 9.71829E-06 | 7.97391E-05 |
| 9.72932E-06 | 7.97805E-05 |
| 9.72955E-06 | 7.97805E-05 |
| 9.79308E-06 | 8.02757E-05 |
| 9.84872E-06 | 8.0706E-05  |
| 9.85957E-06 | 8.07691E-05 |
| 9.90516E-06 | 8.11065E-05 |
| 9.90708E-06 | 8.11065E-05 |
| 1.01265E-05 | 8.28765E-05 |
| 1.01796E-05 | 8.32845E-05 |
| 1.02092E-05 | 8.34996E-05 |
| 1.02144E-05 | 8.35157E-05 |
| 1.02409E-05 | 8.37062E-05 |
| 1.02659E-05 | 8.38834E-05 |
| 1.02723E-05 | 8.39086E-05 |
| 1.029E-05   | 8.40271E-05 |
| 1.03006E-05 | 8.40863E-05 |
| 1.03206E-05 | 8.42231E-05 |
| 1.03329E-05 | 8.42965E-05 |
| 1.03919E-05 | 8.47511E-05 |
| 1.04311E-05 | 8.50433E-05 |
| 1.04385E-05 | 8.5077E-05  |
| 1.04715E-05 | 8.53186E-05 |
| 1.05076E-05 | 8.55859E-05 |
| 1.05139E-05 | 8.56094E-05 |
| 1.05857E-05 | 8.61667E-05 |
| 1.07325E-05 | 8.73342E-05 |
| 1.07754E-05 | 8.76555E-05 |
| 1.08128E-05 | 8.79317E-05 |
| 1.08186E-05 | 8.79509E-05 |
| 1.08473E-05 | 8.81567E-05 |
| 1.08616E-05 | 8.82449E-05 |
| 1.0902E-05  | 8.85451E-05 |
| 1.09527E-05 | 8.89285E-05 |
| 1.10641E-05 | 8.98047E-05 |

## TAUvsControls

|             |             |
|-------------|-------------|
| 1.10747E-05 | 8.98625E-05 |
| 1.11002E-05 | 9.00151E-05 |
| 1.11005E-05 | 9.00151E-05 |
| 1.11178E-05 | 9.01267E-05 |
| 1.11407E-05 | 9.02837E-05 |
| 1.11672E-05 | 9.04695E-05 |
| 1.12525E-05 | 9.11319E-05 |
| 1.12785E-05 | 9.13137E-05 |
| 1.13179E-05 | 9.16043E-05 |
| 1.14093E-05 | 9.23144E-05 |
| 1.14543E-05 | 9.26493E-05 |
| 1.14794E-05 | 9.28229E-05 |
| 1.1483E-05  | 9.28233E-05 |
| 1.14957E-05 | 9.28966E-05 |
| 1.15326E-05 | 9.31654E-05 |
| 1.15774E-05 | 9.34977E-05 |
| 1.15909E-05 | 9.35774E-05 |
| 1.17141E-05 | 9.45423E-05 |
| 1.17246E-05 | 9.45969E-05 |
| 1.1755E-05  | 9.48129E-05 |
| 1.17752E-05 | 9.49453E-05 |
| 1.17893E-05 | 9.50291E-05 |
| 1.18378E-05 | 9.539E-05   |
| 1.18752E-05 | 9.56619E-05 |
| 1.19124E-05 | 9.59117E-05 |
| 1.19137E-05 | 9.59117E-05 |
| 1.19177E-05 | 9.59136E-05 |
| 1.19254E-05 | 9.59458E-05 |
| 1.19485E-05 | 9.61016E-05 |
| 1.19664E-05 | 9.62152E-05 |
| 1.19883E-05 | 9.63607E-05 |
| 1.20575E-05 | 9.68865E-05 |
| 1.20615E-05 | 9.68886E-05 |
| 1.20694E-05 | 9.69215E-05 |
| 1.20831E-05 | 9.70012E-05 |
| 1.21362E-05 | 9.73969E-05 |
| 1.21605E-05 | 9.75618E-05 |
| 1.22082E-05 | 9.79134E-05 |
| 1.22225E-05 | 9.79975E-05 |
| 1.2231E-05  | 9.80357E-05 |
| 1.22464E-05 | 9.81283E-05 |
| 1.22894E-05 | 9.84415E-05 |
| 1.2368E-05  | 9.90405E-05 |
| 1.24234E-05 | 9.94533E-05 |
| 1.24333E-05 | 9.95012E-05 |
| 1.24472E-05 | 9.95818E-05 |
| 1.24987E-05 | 9.99627E-05 |
| 1.25029E-05 | 9.99648E-05 |
| 1.25363E-05 | 0.000100201 |
| 1.25612E-05 | 0.000100368 |
| 1.25945E-05 | 0.000100603 |

## TAUvsControls

|             |             |
|-------------|-------------|
| 1.26881E-05 | 0.000101319 |
| 1.26923E-05 | 0.000101321 |
| 1.27203E-05 | 0.000101513 |
| 1.2725E-05  | 0.000101519 |
| 1.28023E-05 | 0.000102104 |
| 1.29282E-05 | 0.000103076 |
| 1.29514E-05 | 0.000103229 |
| 1.29867E-05 | 0.000103478 |
| 1.30101E-05 | 0.000103632 |
| 1.30572E-05 | 0.000103975 |
| 1.30747E-05 | 0.000104083 |
| 1.31045E-05 | 0.000104287 |
| 1.3125E-05  | 0.000104418 |
| 1.31294E-05 | 0.00010442  |
| 1.31503E-05 | 0.000104554 |
| 1.31923E-05 | 0.000104856 |
| 1.32478E-05 | 0.000105265 |
| 1.33494E-05 | 0.000106039 |
| 1.33595E-05 | 0.000106076 |
| 1.33624E-05 | 0.000106076 |
| 1.34395E-05 | 0.000106655 |
| 1.34481E-05 | 0.00010669  |
| 1.34628E-05 | 0.000106774 |
| 1.34839E-05 | 0.000106908 |
| 1.34897E-05 | 0.000106921 |
| 1.34975E-05 | 0.00010695  |
| 1.35628E-05 | 0.000107435 |
| 1.36125E-05 | 0.000107795 |
| 1.36179E-05 | 0.000107804 |
| 1.36748E-05 | 0.000108222 |
| 1.36977E-05 | 0.000108369 |
| 1.37123E-05 | 0.000108451 |
| 1.37723E-05 | 0.000108892 |
| 1.37886E-05 | 0.000108987 |
| 1.38072E-05 | 0.000109101 |
| 1.3909E-05  | 0.000109871 |
| 1.39331E-05 | 0.000110028 |
| 1.39823E-05 | 0.000110382 |
| 1.40196E-05 | 0.000110643 |
| 1.40357E-05 | 0.000110735 |
| 1.40633E-05 | 0.00011092  |
| 1.40934E-05 | 0.000111123 |
| 1.41045E-05 | 0.000111176 |
| 1.41199E-05 | 0.000111263 |
| 1.41543E-05 | 0.0001115   |
| 1.41609E-05 | 0.000111518 |
| 1.41799E-05 | 0.000111633 |
| 1.42093E-05 | 0.00011183  |
| 1.4214E-05  | 0.000111832 |
| 1.43012E-05 | 0.000112485 |
| 1.43249E-05 | 0.000112622 |



## TAUvsControls

|             |             |
|-------------|-------------|
| 1.43275E-05 | 0.000112622 |
| 1.44018E-05 | 0.000113171 |
| 1.44071E-05 | 0.000113179 |
| 1.44288E-05 | 0.000113314 |
| 1.4532E-05  | 0.000114089 |
| 1.45678E-05 | 0.000114321 |
| 1.45703E-05 | 0.000114321 |
| 1.45872E-05 | 0.000114418 |
| 1.46044E-05 | 0.000114518 |
| 1.46275E-05 | 0.000114664 |
| 1.46815E-05 | 0.000115053 |
| 1.46891E-05 | 0.000115077 |
| 1.47187E-05 | 0.000115273 |
| 1.47441E-05 | 0.000115437 |
| 1.47791E-05 | 0.000115676 |
| 1.483E-05   | 0.000116034 |
| 1.4834E-05  | 0.000116034 |
| 1.48748E-05 | 0.000116318 |
| 1.48938E-05 | 0.000116431 |
| 1.51191E-05 | 0.000118156 |
| 1.52254E-05 | 0.000118951 |
| 1.524E-05   | 0.000119029 |
| 1.5257E-05  | 0.000119115 |
| 1.52603E-05 | 0.000119115 |
| 1.53469E-05 | 0.000119754 |
| 1.53656E-05 | 0.000119864 |
| 1.53976E-05 | 0.000120077 |
| 1.54111E-05 | 0.000120146 |
| 1.54808E-05 | 0.000120652 |
| 1.55311E-05 | 0.000121008 |
| 1.55623E-05 | 0.000121214 |
| 1.56394E-05 | 0.000121778 |
| 1.58569E-05 | 0.000123433 |
| 1.58884E-05 | 0.000123641 |
| 1.59055E-05 | 0.000123737 |
| 1.59915E-05 | 0.000124368 |
| 1.60337E-05 | 0.000124659 |
| 1.60791E-05 | 0.000124973 |
| 1.60888E-05 | 0.000125011 |
| 1.61145E-05 | 0.000125173 |
| 1.62321E-05 | 0.000126002 |
| 1.62354E-05 | 0.000126002 |
| 1.62398E-05 | 0.000126002 |
| 1.62409E-05 | 0.000126002 |
| 1.63089E-05 | 0.000126491 |
| 1.63274E-05 | 0.000126597 |
| 1.64406E-05 | 0.000127436 |
| 1.65413E-05 | 0.000128177 |
| 1.65472E-05 | 0.000128184 |
| 1.66042E-05 | 0.000128587 |
| 1.66662E-05 | 0.000129028 |

## TAUvsControls

|             |             |
|-------------|-------------|
| 1.67197E-05 | 0.000129404 |
| 1.67885E-05 | 0.000129897 |
| 1.6906E-05  | 0.000130766 |
| 1.693E-05   | 0.000130912 |
| 1.70303E-05 | 0.000131649 |
| 1.71782E-05 | 0.000132752 |
| 1.72054E-05 | 0.000132856 |
| 1.7206E-05  | 0.000132856 |
| 1.72072E-05 | 0.000132856 |
| 1.72175E-05 | 0.000132895 |
| 1.72532E-05 | 0.000133122 |
| 1.72572E-05 | 0.000133122 |
| 1.72858E-05 | 0.000133302 |
| 1.7334E-05  | 0.000133633 |
| 1.73991E-05 | 0.000134095 |
| 1.74329E-05 | 0.000134316 |
| 1.74888E-05 | 0.000134705 |
| 1.75251E-05 | 0.000134945 |
| 1.75367E-05 | 0.000134994 |
| 1.76562E-05 | 0.000135865 |
| 1.76605E-05 | 0.000135865 |
| 1.76774E-05 | 0.000135954 |
| 1.76921E-05 | 0.000136026 |
| 1.77051E-05 | 0.000136086 |
| 1.77379E-05 | 0.000136297 |
| 1.77608E-05 | 0.000136432 |
| 1.77825E-05 | 0.000136558 |
| 1.7802E-05  | 0.000136667 |
| 1.78501E-05 | 0.000136995 |
| 1.78724E-05 | 0.000137125 |
| 1.78879E-05 | 0.000137203 |
| 1.79616E-05 | 0.000137705 |
| 1.79641E-05 | 0.000137705 |
| 1.8032E-05  | 0.000138184 |
| 1.80465E-05 | 0.000138254 |
| 1.80682E-05 | 0.000138379 |
| 1.80792E-05 | 0.000138422 |
| 1.81849E-05 | 0.00013919  |
| 1.82035E-05 | 0.00013929  |
| 1.82753E-05 | 0.000139798 |
| 1.83078E-05 | 0.000140005 |
| 1.83809E-05 | 0.000140522 |
| 1.84208E-05 | 0.000140759 |
| 1.84229E-05 | 0.000140759 |
| 1.8493E-05  | 0.000141224 |
| 1.84947E-05 | 0.000141224 |
| 1.86546E-05 | 0.000142402 |
| 1.8665E-05  | 0.000142439 |
| 1.8717E-05  | 0.000142794 |
| 1.87251E-05 | 0.000142813 |
| 1.87733E-05 | 0.000143138 |

## TAUvsControls

|             |             |
|-------------|-------------|
| 1.88025E-05 | 0.000143318 |
| 1.88419E-05 | 0.000143576 |
| 1.89112E-05 | 0.000144061 |
| 1.89881E-05 | 0.000144604 |
| 1.90389E-05 | 0.000144948 |
| 1.9168E-05  | 0.000145887 |
| 1.92399E-05 | 0.000146391 |
| 1.92523E-05 | 0.000146408 |
| 1.92536E-05 | 0.000146408 |
| 1.92687E-05 | 0.00014648  |
| 1.93711E-05 | 0.000147215 |
| 1.94899E-05 | 0.000148074 |
| 1.9526E-05  | 0.000148304 |
| 1.95391E-05 | 0.000148359 |
| 1.95772E-05 | 0.000148605 |
| 1.95989E-05 | 0.000148726 |
| 1.96674E-05 | 0.000149201 |
| 1.97428E-05 | 0.000149729 |
| 1.98619E-05 | 0.000150588 |
| 2.00543E-05 | 0.000152002 |
| 2.02371E-05 | 0.000153341 |
| 2.02691E-05 | 0.000153539 |
| 2.03672E-05 | 0.000154196 |
| 2.03678E-05 | 0.000154196 |
| 2.04722E-05 | 0.00015494  |
| 2.0492E-05  | 0.000155044 |
| 2.07166E-05 | 0.000156697 |
| 2.09015E-05 | 0.000158049 |
| 2.11019E-05 | 0.000159517 |
| 2.11535E-05 | 0.00015986  |
| 2.12116E-05 | 0.000160252 |
| 2.13472E-05 | 0.00016123  |
| 2.14124E-05 | 0.000161674 |
| 2.1424E-05  | 0.000161714 |
| 2.14633E-05 | 0.000161963 |
| 2.17636E-05 | 0.000164181 |
| 2.19106E-05 | 0.000165231 |
| 2.19157E-05 | 0.000165231 |
| 2.19315E-05 | 0.000165302 |
| 2.19901E-05 | 0.000165695 |
| 2.20787E-05 | 0.000166314 |
| 2.20941E-05 | 0.00016638  |
| 2.2166E-05  | 0.000166873 |
| 2.2228E-05  | 0.00016729  |
| 2.23302E-05 | 0.00016801  |
| 2.23485E-05 | 0.000168099 |
| 2.23848E-05 | 0.000168322 |
| 2.24474E-05 | 0.000168734 |
| 2.24527E-05 | 0.000168734 |
| 2.24653E-05 | 0.000168779 |
| 2.25272E-05 | 0.000169195 |

## TAUvsControls

|             |             |
|-------------|-------------|
| 2.26482E-05 | 0.000170054 |
| 2.27882E-05 | 0.000171021 |
| 2.27904E-05 | 0.000171021 |
| 2.28404E-05 | 0.000171347 |
| 2.28491E-05 | 0.000171362 |
| 2.29041E-05 | 0.000171724 |
| 2.29704E-05 | 0.000172171 |
| 2.306E-05   | 0.000172791 |
| 2.31841E-05 | 0.000173671 |
| 2.32014E-05 | 0.00017375  |
| 2.32083E-05 | 0.000173751 |
| 2.32157E-05 | 0.000173755 |
| 2.32722E-05 | 0.000174127 |
| 2.32971E-05 | 0.000174263 |
| 2.3417E-05  | 0.000175108 |
| 2.34319E-05 | 0.000175169 |
| 2.34586E-05 | 0.000175317 |
| 2.35401E-05 | 0.000175875 |
| 2.36316E-05 | 0.000176507 |
| 2.36897E-05 | 0.00017689  |
| 2.3862E-05  | 0.000178125 |
| 2.38716E-05 | 0.000178144 |
| 2.39394E-05 | 0.000178598 |
| 2.39575E-05 | 0.000178682 |
| 2.39739E-05 | 0.000178752 |
| 2.40097E-05 | 0.000178967 |
| 2.40507E-05 | 0.000179221 |
| 2.40969E-05 | 0.000179475 |
| 2.40988E-05 | 0.000179475 |
| 2.42573E-05 | 0.000180603 |
| 2.44182E-05 | 0.000181747 |
| 2.44302E-05 | 0.000181784 |
| 2.46628E-05 | 0.000183462 |
| 2.469E-05   | 0.000183611 |
| 2.4747E-05  | 0.000183981 |
| 2.47576E-05 | 0.000184007 |
| 2.47697E-05 | 0.000184015 |
| 2.4773E-05  | 0.000184015 |
| 2.48042E-05 | 0.000184193 |
| 2.49625E-05 | 0.000185315 |
| 2.51784E-05 | 0.000186863 |
| 2.51863E-05 | 0.000186868 |
| 2.52481E-05 | 0.000187272 |
| 2.53493E-05 | 0.000187969 |
| 2.54222E-05 | 0.000188455 |
| 2.54308E-05 | 0.000188464 |
| 2.54688E-05 | 0.000188691 |
| 2.54826E-05 | 0.000188739 |
| 2.54936E-05 | 0.000188766 |
| 2.55703E-05 | 0.000189279 |
| 2.55996E-05 | 0.0001894   |

## TAUvsControls

|             |             |
|-------------|-------------|
| 2.56014E-05 | 0.0001894   |
| 2.56335E-05 | 0.000189583 |
| 2.56767E-05 | 0.000189848 |
| 2.58358E-05 | 0.000190969 |
| 2.58928E-05 | 0.000191335 |
| 2.59066E-05 | 0.000191382 |
| 2.59964E-05 | 0.00019193  |
| 2.60015E-05 | 0.00019193  |
| 2.60033E-05 | 0.00019193  |
| 2.60421E-05 | 0.000192108 |
| 2.60423E-05 | 0.000192108 |
| 2.60592E-05 | 0.000192178 |
| 2.61001E-05 | 0.000192424 |
| 2.64183E-05 | 0.000194713 |
| 2.64565E-05 | 0.000194939 |
| 2.65025E-05 | 0.000195222 |
| 2.65667E-05 | 0.000195639 |
| 2.65897E-05 | 0.000195751 |
| 2.65972E-05 | 0.000195751 |
| 2.67412E-05 | 0.000196754 |
| 2.6772E-05  | 0.000196924 |
| 2.68203E-05 | 0.000197223 |
| 2.68906E-05 | 0.000197683 |
| 2.69503E-05 | 0.000198065 |
| 2.69863E-05 | 0.000198273 |
| 2.70341E-05 | 0.000198568 |
| 2.70658E-05 | 0.000198743 |
| 2.71209E-05 | 0.000199091 |
| 2.72984E-05 | 0.000200337 |
| 2.74529E-05 | 0.000201413 |
| 2.75169E-05 | 0.000201825 |
| 2.77151E-05 | 0.000203221 |
| 2.77241E-05 | 0.000203228 |
| 2.78102E-05 | 0.000203801 |
| 2.78238E-05 | 0.00020381  |
| 2.78273E-05 | 0.00020381  |
| 2.78681E-05 | 0.000204051 |
| 2.78957E-05 | 0.000204194 |
| 2.79722E-05 | 0.000204696 |
| 2.80411E-05 | 0.000205141 |
| 2.82152E-05 | 0.000206356 |
| 2.83298E-05 | 0.000207085 |
| 2.8331E-05  | 0.000207085 |
| 2.83985E-05 | 0.000207519 |
| 2.84484E-05 | 0.0002078   |
| 2.84531E-05 | 0.0002078   |
| 2.89823E-05 | 0.000211604 |
| 2.91625E-05 | 0.000212859 |
| 2.92907E-05 | 0.000213734 |
| 2.93121E-05 | 0.00021383  |
| 2.93385E-05 | 0.000213961 |

## TAUvsControls

|             |             |
|-------------|-------------|
| 2.94066E-05 | 0.000214398 |
| 2.97035E-05 | 0.000216482 |
| 2.97094E-05 | 0.000216482 |
| 2.97192E-05 | 0.000216492 |
| 2.97485E-05 | 0.000216644 |
| 2.9878E-05  | 0.000217525 |
| 2.99982E-05 | 0.000218338 |
| 3.03003E-05 | 0.000220475 |
| 3.03286E-05 | 0.000220618 |
| 3.04467E-05 | 0.000221414 |
| 3.06125E-05 | 0.000222557 |
| 3.06981E-05 | 0.000223116 |
| 3.07419E-05 | 0.000223371 |
| 3.08866E-05 | 0.000224358 |
| 3.09107E-05 | 0.00022447  |
| 3.11587E-05 | 0.000226207 |
| 3.12472E-05 | 0.000226786 |
| 3.14357E-05 | 0.000228089 |
| 3.14597E-05 | 0.000228198 |
| 3.14877E-05 | 0.000228337 |
| 3.16179E-05 | 0.000229124 |
| 3.16218E-05 | 0.000229124 |
| 3.1623E-05  | 0.000229124 |
| 3.17305E-05 | 0.000229838 |
| 3.18054E-05 | 0.000230315 |
| 3.18734E-05 | 0.000230743 |
| 3.19211E-05 | 0.000231023 |
| 3.19643E-05 | 0.00023127  |
| 3.20106E-05 | 0.000231539 |
| 3.20296E-05 | 0.000231612 |
| 3.21955E-05 | 0.000232746 |
| 3.22808E-05 | 0.000233278 |
| 3.22873E-05 | 0.000233278 |
| 3.2311E-05  | 0.000233383 |
| 3.23312E-05 | 0.000233464 |
| 3.24149E-05 | 0.000234002 |
| 3.25E-05    | 0.000234551 |
| 3.25629E-05 | 0.000234938 |
| 3.2851E-05  | 0.000236885 |
| 3.28511E-05 | 0.000236885 |
| 3.29536E-05 | 0.000237543 |
| 3.2961E-05  | 0.000237543 |
| 3.31508E-05 | 0.000238844 |
| 3.32132E-05 | 0.000239227 |
| 3.34399E-05 | 0.000240791 |
| 3.34745E-05 | 0.000240973 |
| 3.35492E-05 | 0.000241443 |
| 3.36642E-05 | 0.000242203 |
| 3.36912E-05 | 0.000242329 |
| 3.38577E-05 | 0.000243459 |
| 3.38799E-05 | 0.00024355  |

## TAUvsControls

|             |             |
|-------------|-------------|
| 3.39559E-05 | 0.000244028 |
| 3.4069E-05  | 0.000244699 |
| 3.40738E-05 | 0.000244699 |
| 3.4078E-05  | 0.000244699 |
| 3.41733E-05 | 0.000245303 |
| 3.41811E-05 | 0.000245303 |
| 3.4336E-05  | 0.000246345 |
| 3.44874E-05 | 0.000247362 |
| 3.45045E-05 | 0.000247415 |
| 3.4548E-05  | 0.000247658 |
| 3.47227E-05 | 0.000248841 |
| 3.4921E-05  | 0.000250193 |
| 3.50853E-05 | 0.000251299 |
| 3.51241E-05 | 0.000251507 |
| 3.53206E-05 | 0.000252843 |
| 3.53826E-05 | 0.000253148 |
| 3.53829E-05 | 0.000253148 |
| 3.56035E-05 | 0.000254655 |
| 3.59474E-05 | 0.000257044 |
| 3.60274E-05 | 0.000257544 |
| 3.60626E-05 | 0.000257724 |
| 3.61744E-05 | 0.00025845  |
| 3.65928E-05 | 0.000261367 |
| 3.66248E-05 | 0.000261523 |
| 3.68568E-05 | 0.000263106 |
| 3.68935E-05 | 0.000263295 |
| 3.69054E-05 | 0.000263306 |
| 3.69185E-05 | 0.000263327 |
| 3.70335E-05 | 0.000264073 |
| 3.70966E-05 | 0.00026445  |
| 3.71826E-05 | 0.000264989 |
| 3.72692E-05 | 0.000265532 |
| 3.72959E-05 | 0.000265649 |
| 3.74249E-05 | 0.000266494 |
| 3.74909E-05 | 0.00026689  |
| 3.75802E-05 | 0.000267451 |
| 3.7704E-05  | 0.000268258 |
| 3.78565E-05 | 0.000269269 |
| 3.80232E-05 | 0.000270379 |
| 3.80742E-05 | 0.000270666 |
| 3.80997E-05 | 0.000270773 |
| 3.81333E-05 | 0.000270936 |
| 3.81716E-05 | 0.000271133 |
| 3.82216E-05 | 0.000271414 |
| 3.8244E-05  | 0.000271498 |
| 3.8299E-05  | 0.000271813 |
| 3.88596E-05 | 0.000275715 |
| 3.89314E-05 | 0.000276148 |
| 3.91061E-05 | 0.00027731  |
| 3.91493E-05 | 0.00027754  |
| 3.92851E-05 | 0.000278414 |

## TAUvsControls

|             |             |
|-------------|-------------|
| 3.92943E-05 | 0.000278414 |
| 3.93191E-05 | 0.000278513 |
| 3.95437E-05 | 0.000280027 |
| 3.95966E-05 | 0.000280284 |
| 3.96019E-05 | 0.000280284 |
| 3.97892E-05 | 0.000281532 |
| 3.98526E-05 | 0.000281903 |
| 3.98838E-05 | 0.000282046 |
| 3.99924E-05 | 0.000282736 |
| 4.00633E-05 | 0.000283159 |
| 4.01582E-05 | 0.000283751 |
| 4.03117E-05 | 0.000284758 |
| 4.03588E-05 | 0.000285012 |
| 4.0505E-05  | 0.000285965 |
| 4.07648E-05 | 0.000287721 |
| 4.08219E-05 | 0.000288044 |
| 4.0846E-05  | 0.000288135 |
| 4.10159E-05 | 0.000289254 |
| 4.11064E-05 | 0.000289813 |
| 4.13244E-05 | 0.00029127  |
| 4.14589E-05 | 0.000292137 |
| 4.16155E-05 | 0.00029316  |
| 4.16325E-05 | 0.0002932   |
| 4.17716E-05 | 0.000294099 |
| 4.18563E-05 | 0.000294613 |
| 4.18885E-05 | 0.00029476  |
| 4.2012E-05  | 0.000295548 |
| 4.22418E-05 | 0.000297083 |
| 4.25264E-05 | 0.000299002 |
| 4.25647E-05 | 0.000299189 |
| 4.26047E-05 | 0.000299388 |
| 4.2661E-05  | 0.000299702 |
| 4.27525E-05 | 0.000300262 |
| 4.28323E-05 | 0.000300741 |
| 4.28545E-05 | 0.000300814 |
| 4.29036E-05 | 0.000301077 |
| 4.31339E-05 | 0.00030261  |
| 4.31841E-05 | 0.000302879 |
| 4.32966E-05 | 0.000303585 |
| 4.35328E-05 | 0.000305158 |
| 4.3572E-05  | 0.00030535  |
| 4.37239E-05 | 0.00030633  |
| 4.39506E-05 | 0.000307834 |
| 4.42257E-05 | 0.000309676 |
| 4.43065E-05 | 0.000310158 |
| 4.45627E-05 | 0.000311866 |
| 4.46982E-05 | 0.000312729 |
| 4.47412E-05 | 0.000312944 |
| 4.50063E-05 | 0.000314713 |
| 4.50932E-05 | 0.000315235 |
| 4.51235E-05 | 0.000315361 |



## TAUvsControls

|             |             |
|-------------|-------------|
| 4.52489E-05 | 0.000316151 |
| 4.53338E-05 | 0.000316658 |
| 4.55294E-05 | 0.000317937 |
| 4.55833E-05 | 0.000318227 |
| 4.59496E-05 | 0.000320697 |
| 4.6003E-05  | 0.00032095  |
| 4.60109E-05 | 0.00032095  |
| 4.63214E-05 | 0.000323028 |
| 4.63722E-05 | 0.000323294 |
| 4.65194E-05 | 0.000324233 |
| 4.6687E-05  | 0.000325313 |
| 4.68802E-05 | 0.00032657  |
| 4.6928E-05  | 0.000326814 |
| 4.70201E-05 | 0.000327352 |
| 4.70308E-05 | 0.000327352 |
| 4.72073E-05 | 0.000328492 |
| 4.7446E-05  | 0.000330063 |
| 4.75356E-05 | 0.000330597 |
| 4.75702E-05 | 0.000330747 |
| 4.76808E-05 | 0.000331426 |
| 4.76974E-05 | 0.000331452 |
| 4.78526E-05 | 0.000332441 |
| 4.79709E-05 | 0.000333172 |
| 4.80191E-05 | 0.000333417 |
| 4.81346E-05 | 0.000334129 |
| 4.81878E-05 | 0.000334407 |
| 4.82542E-05 | 0.000334777 |
| 4.84807E-05 | 0.000336258 |
| 4.86748E-05 | 0.000337513 |
| 4.87347E-05 | 0.000337837 |
| 4.87543E-05 | 0.000337882 |
| 4.90127E-05 | 0.00033958  |
| 4.90931E-05 | 0.000340046 |
| 4.95856E-05 | 0.000343365 |
| 4.96602E-05 | 0.000343788 |
| 5.01117E-05 | 0.000346792 |
| 5.01211E-05 | 0.000346792 |
| 5.05383E-05 | 0.00034947  |
| 5.05483E-05 | 0.00034947  |
| 5.05491E-05 | 0.00034947  |
| 5.0581E-05  | 0.000349596 |
| 5.08042E-05 | 0.000351044 |
| 5.08926E-05 | 0.00035156  |
| 5.10826E-05 | 0.000352732 |
| 5.10897E-05 | 0.000352732 |
| 5.13405E-05 | 0.000354368 |
| 5.15316E-05 | 0.00035546  |
| 5.15378E-05 | 0.00035546  |
| 5.15428E-05 | 0.00035546  |
| 5.15541E-05 | 0.00035546  |
| 5.1666E-05  | 0.000356135 |

## TAUvsControls

|             |             |
|-------------|-------------|
| 5.17854E-05 | 0.000356863 |
| 5.1981E-05  | 0.000358115 |
| 5.20527E-05 | 0.000358512 |
| 5.21578E-05 | 0.00035914  |
| 5.22352E-05 | 0.000359576 |
| 5.23964E-05 | 0.000360589 |
| 5.252E-05   | 0.000361299 |
| 5.25277E-05 | 0.000361299 |
| 5.25707E-05 | 0.000361497 |
| 5.26121E-05 | 0.000361685 |
| 5.2635E-05  | 0.000361746 |
| 5.28322E-05 | 0.000363004 |
| 5.33782E-05 | 0.000366657 |
| 5.34971E-05 | 0.000367375 |
| 5.39019E-05 | 0.000370056 |
| 5.39445E-05 | 0.00037025  |
| 5.40948E-05 | 0.000371182 |
| 5.42378E-05 | 0.000372064 |
| 5.45751E-05 | 0.000374277 |
| 5.46468E-05 | 0.000374669 |
| 5.4681E-05  | 0.000374803 |
| 5.50627E-05 | 0.000377319 |
| 5.51708E-05 | 0.000377958 |
| 5.5448E-05  | 0.000379756 |
| 5.55797E-05 | 0.000380557 |
| 5.56239E-05 | 0.000380757 |
| 5.56456E-05 | 0.000380804 |
| 5.59857E-05 | 0.000383029 |
| 5.64063E-05 | 0.000385804 |
| 5.69867E-05 | 0.00038967  |
| 5.72784E-05 | 0.00039156  |
| 5.74262E-05 | 0.000392466 |
| 5.74424E-05 | 0.000392472 |
| 5.74964E-05 | 0.000392666 |
| 5.75014E-05 | 0.000392666 |
| 5.78483E-05 | 0.000394929 |
| 5.78906E-05 | 0.000395114 |
| 5.79333E-05 | 0.000395299 |
| 5.82803E-05 | 0.000397561 |
| 5.84619E-05 | 0.000398694 |
| 5.84845E-05 | 0.000398743 |
| 5.87164E-05 | 0.000400217 |
| 5.88327E-05 | 0.000400903 |
| 5.88829E-05 | 0.000401093 |
| 5.88919E-05 | 0.000401093 |
| 5.91337E-05 | 0.000402634 |
| 5.92472E-05 | 0.000403299 |
| 5.93326E-05 | 0.000403702 |
| 5.93378E-05 | 0.000403702 |
| 5.9423E-05  | 0.000404174 |
| 5.94471E-05 | 0.000404231 |

## TAUvsControls

|             |             |
|-------------|-------------|
| 5.95583E-05 | 0.00040488  |
| 5.96468E-05 | 0.000405374 |
| 5.97382E-05 | 0.000405887 |
| 5.97936E-05 | 0.000406156 |
| 5.98641E-05 | 0.000406527 |
| 5.99842E-05 | 0.000407235 |
| 6.00436E-05 | 0.000407531 |
| 6.01423E-05 | 0.000408092 |
| 6.03711E-05 | 0.000409536 |
| 6.0556E-05  | 0.000410682 |
| 6.06021E-05 | 0.000410873 |
| 6.06162E-05 | 0.000410873 |
| 6.06596E-05 | 0.000411059 |
| 6.07789E-05 | 0.000411759 |
| 6.08388E-05 | 0.000412056 |
| 6.08705E-05 | 0.000412066 |
| 6.08725E-05 | 0.000412066 |
| 6.0979E-05  | 0.000412607 |
| 6.09845E-05 | 0.000412607 |
| 6.10027E-05 | 0.000412621 |
| 6.12275E-05 | 0.000414032 |
| 6.14591E-05 | 0.000415489 |
| 6.14892E-05 | 0.000415583 |
| 6.17333E-05 | 0.000417123 |
| 6.20193E-05 | 0.000418945 |
| 6.21371E-05 | 0.00041963  |
| 6.22654E-05 | 0.000420386 |
| 6.35262E-05 | 0.000428785 |
| 6.36039E-05 | 0.000429107 |
| 6.36073E-05 | 0.000429107 |
| 6.46077E-05 | 0.000435741 |
| 6.46352E-05 | 0.000435812 |
| 6.47176E-05 | 0.000436167 |
| 6.47219E-05 | 0.000436167 |
| 6.49987E-05 | 0.000437917 |
| 6.52867E-05 | 0.000439742 |
| 6.55845E-05 | 0.000441624 |
| 6.56006E-05 | 0.000441624 |
| 6.59745E-05 | 0.000444025 |
| 6.61556E-05 | 0.000445127 |
| 6.62175E-05 | 0.000445334 |
| 6.62211E-05 | 0.000445334 |
| 6.63585E-05 | 0.000446141 |
| 6.66191E-05 | 0.000447678 |
| 6.6622E-05  | 0.000447678 |
| 6.66512E-05 | 0.000447757 |
| 6.69116E-05 | 0.000449389 |
| 6.71625E-05 | 0.000450956 |
| 6.73483E-05 | 0.000452085 |
| 6.7404E-05  | 0.000452341 |
| 6.7422E-05  | 0.000452343 |

## TAUvsControls

|             |             |
|-------------|-------------|
| 6.78213E-05 | 0.000454903 |
| 6.78974E-05 | 0.000455294 |
| 6.79524E-05 | 0.000455544 |
| 6.82949E-05 | 0.000457721 |
| 6.8494E-05  | 0.000458935 |
| 6.88523E-05 | 0.000461215 |
| 6.89265E-05 | 0.000461526 |
| 6.89347E-05 | 0.000461526 |
| 6.91817E-05 | 0.000463059 |
| 6.97818E-05 | 0.000466954 |
| 7.01182E-05 | 0.000469082 |
| 7.03733E-05 | 0.000470666 |
| 7.04651E-05 | 0.000471114 |
| 7.0477E-05  | 0.000471114 |
| 7.05045E-05 | 0.000471175 |
| 7.07736E-05 | 0.00047285  |
| 7.12974E-05 | 0.000476226 |
| 7.14594E-05 | 0.000477123 |
| 7.14689E-05 | 0.000477123 |
| 7.20651E-05 | 0.000480978 |
| 7.27927E-05 | 0.000485708 |
| 7.34199E-05 | 0.000489765 |
| 7.34465E-05 | 0.000489815 |
| 7.36334E-05 | 0.000490934 |
| 7.38285E-05 | 0.000492107 |
| 7.3967E-05  | 0.0004929   |
| 7.39859E-05 | 0.0004929   |
| 7.41314E-05 | 0.000493741 |
| 7.42044E-05 | 0.000494099 |
| 7.4283E-05  | 0.000494494 |
| 7.44121E-05 | 0.000495161 |
| 7.44218E-05 | 0.000495161 |
| 7.45645E-05 | 0.000495982 |
| 7.46509E-05 | 0.000496427 |
| 7.48204E-05 | 0.000497426 |
| 7.48404E-05 | 0.00049743  |
| 7.49283E-05 | 0.000497885 |
| 7.53554E-05 | 0.000500594 |
| 7.58768E-05 | 0.000503927 |
| 7.60481E-05 | 0.000504933 |
| 7.60991E-05 | 0.000505141 |
| 7.62135E-05 | 0.000505769 |
| 7.65068E-05 | 0.000507585 |
| 7.67513E-05 | 0.000509075 |
| 7.73059E-05 | 0.000512621 |
| 7.77513E-05 | 0.000515417 |
| 7.77677E-05 | 0.000515417 |
| 7.7822E-05  | 0.000515644 |
| 7.81889E-05 | 0.000517941 |
| 7.8751E-05  | 0.000521529 |
| 7.89017E-05 | 0.000522393 |

## TAUvsControls

|             |             |
|-------------|-------------|
| 7.93173E-05 | 0.000525009 |
| 7.9595E-05  | 0.000526711 |
| 7.98563E-05 | 0.000528304 |
| 8.05699E-05 | 0.000532887 |
| 8.07264E-05 | 0.000533785 |
| 8.09853E-05 | 0.000535359 |
| 8.10461E-05 | 0.000535623 |
| 8.12039E-05 | 0.000536527 |
| 8.15981E-05 | 0.000538993 |
| 8.16336E-05 | 0.000539088 |
| 8.1709E-05  | 0.000539448 |
| 8.19487E-05 | 0.000540891 |
| 8.23869E-05 | 0.000543643 |
| 8.24746E-05 | 0.000544082 |
| 8.30795E-05 | 0.000547931 |
| 8.34397E-05 | 0.000550166 |
| 8.3526E-05  | 0.000550593 |
| 8.38119E-05 | 0.000552336 |
| 8.39084E-05 | 0.00055283  |
| 8.40678E-05 | 0.000553738 |
| 8.42888E-05 | 0.000554957 |
| 8.42962E-05 | 0.000554957 |
| 8.45181E-05 | 0.000556275 |
| 8.4766E-05  | 0.000557764 |
| 8.52656E-05 | 0.000560787 |
| 8.52854E-05 | 0.000560787 |
| 8.52911E-05 | 0.000560787 |
| 8.53379E-05 | 0.000560951 |
| 8.59501E-05 | 0.000564831 |
| 8.60184E-05 | 0.000565135 |
| 8.60867E-05 | 0.000565439 |
| 8.63158E-05 | 0.000566799 |
| 8.64086E-05 | 0.000567262 |
| 8.65046E-05 | 0.000567747 |
| 8.67315E-05 | 0.000569091 |
| 8.70061E-05 | 0.000570747 |
| 8.75955E-05 | 0.000574466 |
| 8.76329E-05 | 0.000574565 |
| 8.77027E-05 | 0.000574875 |
| 8.7774E-05  | 0.000575196 |
| 8.78298E-05 | 0.000575349 |
| 8.78423E-05 | 0.000575349 |
| 8.81538E-05 | 0.000577242 |
| 8.83901E-05 | 0.000578642 |
| 8.84753E-05 | 0.000579051 |
| 8.85528E-05 | 0.000579411 |
| 8.88496E-05 | 0.000581205 |
| 8.93583E-05 | 0.000584383 |
| 8.94757E-05 | 0.000585002 |
| 8.96227E-05 | 0.000585813 |
| 8.9787E-05  | 0.000586738 |

## TAUvsControls

|             |             |
|-------------|-------------|
| 8.99357E-05 | 0.00058756  |
| 9.04797E-05 | 0.000590964 |
| 9.05959E-05 | 0.000591572 |
| 9.09815E-05 | 0.000593939 |
| 9.10454E-05 | 0.000594204 |
| 9.13779E-05 | 0.000596222 |
| 9.15804E-05 | 0.000597392 |
| 9.16528E-05 | 0.000597712 |
| 9.17073E-05 | 0.000597916 |
| 9.17685E-05 | 0.000598163 |
| 9.17928E-05 | 0.000598169 |
| 9.18659E-05 | 0.000598494 |
| 9.19926E-05 | 0.000599167 |
| 9.21883E-05 | 0.000600289 |
| 9.22545E-05 | 0.000600568 |
| 9.29087E-05 | 0.000604657 |
| 9.29298E-05 | 0.000604657 |
| 9.33655E-05 | 0.000607272 |
| 9.33854E-05 | 0.000607272 |
| 9.34028E-05 | 0.000607272 |
| 9.34452E-05 | 0.000607394 |
| 9.39156E-05 | 0.000610297 |
| 9.44341E-05 | 0.000613511 |
| 9.44987E-05 | 0.000613775 |
| 9.457E-05   | 0.000614082 |
| 9.46978E-05 | 0.000614757 |
| 9.47243E-05 | 0.000614773 |
| 9.499E-05   | 0.000616342 |
| 9.53298E-05 | 0.00061839  |
| 9.60831E-05 | 0.000623119 |
| 9.62443E-05 | 0.000624006 |
| 9.64546E-05 | 0.000625212 |
| 9.67427E-05 | 0.000626921 |
| 9.71368E-05 | 0.000629316 |
| 9.79661E-05 | 0.000634528 |
| 9.82861E-05 | 0.00063644  |
| 9.83192E-05 | 0.000636494 |
| 9.88183E-05 | 0.000639564 |
| 9.8944E-05  | 0.000640216 |
| 9.9244E-05  | 0.000641995 |
| 9.93408E-05 | 0.000642459 |
| 9.94106E-05 | 0.000642748 |
| 9.95073E-05 | 0.000643211 |
| 9.99626E-05 | 0.000645992 |
| 0.000100556 | 0.000649664 |
| 0.000100712 | 0.00065051  |
| 0.00010177  | 0.000657173 |
| 0.000102006 | 0.000658533 |
| 0.000102099 | 0.00065897  |
| 0.000102181 | 0.000659331 |
| 0.000102293 | 0.000659889 |

## TAUvsControls

|             |             |
|-------------|-------------|
| 0.000102431 | 0.00066061  |
| 0.000102459 | 0.000660625 |
| 0.000102622 | 0.00066151  |
| 0.000102651 | 0.000661529 |
| 0.000103473 | 0.000666516 |
| 0.000103489 | 0.000666516 |
| 0.000103502 | 0.000666516 |
| 0.00010359  | 0.000666915 |
| 0.000103625 | 0.000666971 |
| 0.000104009 | 0.000669275 |
| 0.000104083 | 0.000669584 |
| 0.00010414  | 0.000669681 |
| 0.000104151 | 0.000669681 |
| 0.000104879 | 0.000674197 |
| 0.000104972 | 0.000674628 |
| 0.000105053 | 0.000674975 |
| 0.000105127 | 0.000675282 |
| 0.000105396 | 0.000676838 |
| 0.000105909 | 0.000679964 |
| 0.000105986 | 0.000680291 |
| 0.000106031 | 0.000680409 |
| 0.000106414 | 0.00068261  |
| 0.000106427 | 0.00068261  |
| 0.000106518 | 0.000683019 |
| 0.00010668  | 0.000683889 |
| 0.000107099 | 0.000686403 |
| 0.000107711 | 0.00069007  |
| 0.000107725 | 0.00069007  |
| 0.00010788  | 0.000690888 |
| 0.000108021 | 0.000691623 |
| 0.000108079 | 0.000691816 |
| 0.000108228 | 0.000692603 |
| 0.00010844  | 0.000693783 |
| 0.00010883  | 0.000696054 |
| 0.000108849 | 0.000696054 |
| 0.000109145 | 0.000697773 |
| 0.000109227 | 0.00069812  |
| 0.000109301 | 0.000698419 |
| 0.000109557 | 0.000699879 |
| 0.000109997 | 0.00070252  |
| 0.0001102   | 0.000703639 |
| 0.000110358 | 0.000704471 |
| 0.000110629 | 0.000706029 |
| 0.000110696 | 0.000706278 |
| 0.000110825 | 0.000706924 |
| 0.000111407 | 0.000710464 |
| 0.000111566 | 0.000711302 |
| 0.000112213 | 0.000715244 |
| 0.000112747 | 0.000718473 |
| 0.000114015 | 0.000726372 |
| 0.000114084 | 0.000726631 |

## TAUvsControls

|             |             |
|-------------|-------------|
| 0.0001145   | 0.0007291   |
| 0.000114581 | 0.000729434 |
| 0.000114718 | 0.000730125 |
| 0.000114884 | 0.000730997 |
| 0.000115078 | 0.000731935 |
| 0.000115088 | 0.000731935 |
| 0.000115274 | 0.000732933 |
| 0.000115482 | 0.000734077 |
| 0.000115628 | 0.000734823 |
| 0.000115757 | 0.000735458 |
| 0.000116322 | 0.000738869 |
| 0.000116889 | 0.000742285 |
| 0.000117075 | 0.000743284 |
| 0.000117664 | 0.000746838 |
| 0.000117764 | 0.000747284 |
| 0.000117917 | 0.000748072 |
| 0.000117978 | 0.000748276 |
| 0.000118639 | 0.000752282 |
| 0.000118685 | 0.000752318 |
| 0.000118721 | 0.000752318 |
| 0.000118733 | 0.000752318 |
| 0.000118955 | 0.00075354  |
| 0.000119348 | 0.000755842 |
| 0.000119888 | 0.000759076 |
| 0.000120167 | 0.000760652 |
| 0.000120423 | 0.000762085 |
| 0.000120538 | 0.000762626 |
| 0.000121054 | 0.000765698 |
| 0.000121275 | 0.00076691  |
| 0.000121657 | 0.000769136 |
| 0.000122466 | 0.000774059 |
| 0.000122772 | 0.000775804 |
| 0.000122947 | 0.000776715 |
| 0.000123121 | 0.000777623 |
| 0.000123194 | 0.000777892 |
| 0.000123282 | 0.000778259 |
| 0.000123568 | 0.000779872 |
| 0.000123962 | 0.000782162 |
| 0.000124289 | 0.000784035 |
| 0.000124711 | 0.000786504 |
| 0.000125114 | 0.000788851 |
| 0.000125724 | 0.0007925   |
| 0.000126559 | 0.000797572 |
| 0.000126852 | 0.000799222 |
| 0.000127114 | 0.000800672 |
| 0.000127556 | 0.00080326  |
| 0.000129194 | 0.000813307 |
| 0.000129215 | 0.000813307 |
| 0.000129311 | 0.000813714 |
| 0.000130003 | 0.000817869 |
| 0.000130413 | 0.000820248 |



## TAUvsControls

|             |             |
|-------------|-------------|
| 0.000130811 | 0.000822545 |
| 0.000131189 | 0.000824526 |
| 0.00013119  | 0.000824526 |
| 0.000131669 | 0.000827337 |
| 0.000131948 | 0.000828884 |
| 0.000132522 | 0.000832286 |
| 0.000132562 | 0.000832334 |
| 0.000133647 | 0.000838941 |
| 0.000134152 | 0.000841789 |
| 0.000134166 | 0.000841789 |
| 0.000134378 | 0.00084291  |
| 0.000134823 | 0.000845496 |
| 0.000134936 | 0.000845763 |
| 0.000134958 | 0.000845763 |
| 0.000134965 | 0.000845763 |
| 0.000135574 | 0.000849374 |
| 0.00013677  | 0.000856655 |
| 0.000137116 | 0.000858614 |
| 0.00013721  | 0.000858993 |
| 0.000137481 | 0.000860483 |
| 0.000137838 | 0.000862507 |
| 0.000137885 | 0.00086259  |
| 0.000138078 | 0.000863515 |
| 0.0001381   | 0.000863515 |
| 0.000138275 | 0.000864398 |
| 0.00013867  | 0.000866652 |
| 0.00013902  | 0.000868632 |
| 0.000139278 | 0.000870029 |
| 0.000139504 | 0.000871229 |
| 0.000139687 | 0.000872162 |
| 0.00014019  | 0.00087509  |
| 0.000140564 | 0.000877207 |
| 0.000140671 | 0.000877664 |
| 0.000141121 | 0.000880253 |
| 0.000141345 | 0.000881437 |
| 0.000141496 | 0.000882167 |
| 0.000141608 | 0.000882652 |
| 0.000141646 | 0.000882672 |
| 0.0001426   | 0.000888399 |
| 0.000142663 | 0.000888575 |
| 0.000142794 | 0.00088918  |
| 0.000143057 | 0.000890597 |
| 0.000143334 | 0.000892104 |
| 0.000143457 | 0.000892657 |
| 0.000143501 | 0.000892711 |
| 0.000143628 | 0.000893287 |
| 0.000144255 | 0.000896967 |
| 0.000144749 | 0.000899729 |
| 0.000144769 | 0.000899729 |
| 0.000144991 | 0.000900888 |
| 0.000145261 | 0.000902347 |

## TAUvsControls

|             |             |
|-------------|-------------|
| 0.00014595  | 0.000906407 |
| 0.000146376 | 0.000908835 |
| 0.000146582 | 0.000909897 |
| 0.000146883 | 0.00091154  |
| 0.000147504 | 0.000915175 |
| 0.000147576 | 0.000915227 |
| 0.000147584 | 0.000915227 |
| 0.000148305 | 0.000919477 |
| 0.000149018 | 0.000923674 |
| 0.00015     | 0.000929534 |
| 0.000150298 | 0.000931156 |
| 0.000150363 | 0.000931335 |
| 0.000151179 | 0.000936107 |
| 0.000151206 | 0.000936107 |
| 0.000151274 | 0.000936303 |
| 0.000151444 | 0.000937123 |
| 0.000151679 | 0.000938357 |
| 0.00015184  | 0.000939125 |
| 0.000152809 | 0.000944886 |
| 0.000153815 | 0.000950879 |
| 0.000154028 | 0.000951909 |
| 0.000154064 | 0.000951909 |
| 0.000154113 | 0.000951909 |
| 0.00015413  | 0.000951909 |
| 0.000154178 | 0.000951975 |
| 0.000154464 | 0.000953513 |
| 0.000154529 | 0.000953686 |
| 0.000154908 | 0.000955795 |
| 0.00015537  | 0.000958413 |
| 0.000155465 | 0.000958767 |
| 0.000156041 | 0.000962088 |
| 0.000156579 | 0.000965175 |
| 0.000156895 | 0.00096689  |
| 0.000157549 | 0.000970689 |
| 0.000157714 | 0.000971471 |
| 0.00015839  | 0.000975403 |
| 0.000158581 | 0.00097634  |
| 0.000160232 | 0.000986269 |
| 0.000161189 | 0.000991926 |
| 0.00016161  | 0.000993944 |
| 0.000161615 | 0.000993944 |
| 0.000161634 | 0.000993944 |
| 0.000161887 | 0.000995262 |
| 0.000162263 | 0.000997336 |
| 0.000162365 | 0.000997726 |
| 0.00016247  | 0.000998097 |
| 0.00016254  | 0.000998097 |
| 0.000162542 | 0.000998097 |
| 0.000162664 | 0.000998569 |
| 0.000162697 | 0.000998569 |
| 0.000162835 | 0.000999178 |

## TAUvsControls

|             |             |
|-------------|-------------|
| 0.000163039 | 0.001000186 |
| 0.000163962 | 0.001005609 |
| 0.000165119 | 0.001012426 |
| 0.000165152 | 0.001012426 |
| 0.000165618 | 0.001015036 |
| 0.000166099 | 0.001017746 |
| 0.000166876 | 0.001022261 |
| 0.000168056 | 0.001029242 |
| 0.00016846  | 0.001031468 |
| 0.000168715 | 0.001032787 |
| 0.000169045 | 0.001034558 |
| 0.000169244 | 0.00103553  |
| 0.000169569 | 0.001037269 |
| 0.00017075  | 0.001044246 |
| 0.000171297 | 0.001047339 |
| 0.000171423 | 0.001047861 |
| 0.000171555 | 0.001048419 |
| 0.000172265 | 0.001052507 |
| 0.000174317 | 0.001064788 |
| 0.000174497 | 0.001065637 |
| 0.000175039 | 0.001068692 |
| 0.000176835 | 0.001079399 |
| 0.000178091 | 0.001086808 |
| 0.000178302 | 0.001087837 |
| 0.000179564 | 0.001095275 |
| 0.000179891 | 0.001097013 |
| 0.000180173 | 0.001098471 |
| 0.00018034  | 0.001099227 |
| 0.000181847 | 0.001108037 |
| 0.000181873 | 0.001108037 |
| 0.000181915 | 0.001108037 |
| 0.00018207  | 0.001108716 |
| 0.000182326 | 0.00111001  |
| 0.000182498 | 0.001110793 |
| 0.000183301 | 0.001115417 |
| 0.000183462 | 0.00111613  |
| 0.000183615 | 0.001116801 |
| 0.000185283 | 0.001126676 |
| 0.000185564 | 0.001128119 |
| 0.000186104 | 0.001130957 |
| 0.000186119 | 0.001130957 |
| 0.000186208 | 0.001131227 |
| 0.000187052 | 0.001136088 |
| 0.000187238 | 0.00113695  |
| 0.00018741  | 0.001137725 |
| 0.000187589 | 0.00113854  |
| 0.000188052 | 0.00114108  |
| 0.000190407 | 0.001155095 |
| 0.00019189  | 0.001163816 |
| 0.00019197  | 0.001164029 |
| 0.000192838 | 0.001169015 |

## TAUvsControls

|             |             |
|-------------|-------------|
| 0.000193735 | 0.001174174 |
| 0.000193781 | 0.001174174 |
| 0.000194334 | 0.001177247 |
| 0.000195069 | 0.001181425 |
| 0.000195456 | 0.001183488 |
| 0.000196366 | 0.001188505 |
| 0.000196377 | 0.001188505 |
| 0.000197285 | 0.001193714 |
| 0.000197904 | 0.001197181 |
| 0.000198741 | 0.001201958 |
| 0.000199245 | 0.001204722 |
| 0.000199497 | 0.001205963 |
| 0.000200162 | 0.0012097   |
| 0.000201117 | 0.001215119 |
| 0.000201154 | 0.001215119 |
| 0.000201204 | 0.001215135 |
| 0.000201258 | 0.001215175 |
| 0.000201384 | 0.001215648 |
| 0.000202158 | 0.001220035 |
| 0.000202849 | 0.00122392  |
| 0.000203153 | 0.001225465 |
| 0.000203229 | 0.001225636 |
| 0.000204117 | 0.001230701 |
| 0.000204551 | 0.001233025 |
| 0.00020465  | 0.001233335 |
| 0.000205174 | 0.001236042 |
| 0.000205196 | 0.001236042 |
| 0.000206025 | 0.001240745 |
| 0.000206429 | 0.001242886 |
| 0.000206517 | 0.001243124 |
| 0.000206607 | 0.001243378 |
| 0.00020696  | 0.001245208 |
| 0.000207213 | 0.001246435 |
| 0.000207715 | 0.001249165 |
| 0.000207934 | 0.001250187 |
| 0.000209188 | 0.001257004 |
| 0.000209201 | 0.001257004 |
| 0.000209224 | 0.001257004 |
| 0.000209264 | 0.001257004 |
| 0.00020955  | 0.001258429 |
| 0.000210513 | 0.001263918 |
| 0.000210569 | 0.001263958 |
| 0.000210964 | 0.001266033 |
| 0.000211118 | 0.001266661 |
| 0.000214914 | 0.001289103 |
| 0.000214959 | 0.001289103 |
| 0.000215588 | 0.001292394 |
| 0.000215609 | 0.001292394 |
| 0.000215908 | 0.001293882 |
| 0.0002166   | 0.001297613 |
| 0.000216631 | 0.001297613 |

## TAUvsControls

|             |             |
|-------------|-------------|
| 0.000217417 | 0.001301937 |
| 0.000217455 | 0.001301937 |
| 0.000217553 | 0.001302221 |
| 0.000217742 | 0.001303048 |
| 0.000218    | 0.001304289 |
| 0.000221043 | 0.001322187 |
| 0.000222272 | 0.001329229 |
| 0.000222392 | 0.001329633 |
| 0.000222749 | 0.001331461 |
| 0.000223182 | 0.001333736 |
| 0.000223237 | 0.001333753 |
| 0.000223382 | 0.001334311 |
| 0.000225631 | 0.001347429 |
| 0.000227471 | 0.001358102 |
| 0.00022886  | 0.001366074 |
| 0.00022988  | 0.001371843 |
| 0.00023012  | 0.001372961 |
| 0.000231953 | 0.001383573 |
| 0.000232018 | 0.001383637 |
| 0.000232315 | 0.001385087 |
| 0.000233017 | 0.00138895  |
| 0.000233468 | 0.001391313 |
| 0.000233731 | 0.001392559 |
| 0.000233787 | 0.001392567 |
| 0.000233898 | 0.001392905 |
| 0.000234392 | 0.001395527 |
| 0.000235105 | 0.001399445 |
| 0.000235489 | 0.001401408 |
| 0.000235688 | 0.001402267 |
| 0.000236346 | 0.001405851 |
| 0.000236615 | 0.001407129 |
| 0.000237362 | 0.001411243 |
| 0.000237858 | 0.001413863 |
| 0.000239268 | 0.001421916 |
| 0.000239748 | 0.001424436 |
| 0.000239901 | 0.001425017 |
| 0.000242569 | 0.001440528 |
| 0.000242828 | 0.001441735 |
| 0.000243722 | 0.001446709 |
| 0.00024468  | 0.001452057 |
| 0.000245743 | 0.001458032 |
| 0.000245809 | 0.001458085 |
| 0.000246865 | 0.001464009 |
| 0.00024693  | 0.001464057 |
| 0.000247918 | 0.001469575 |
| 0.000248678 | 0.001473737 |
| 0.000249833 | 0.001480242 |
| 0.00024992  | 0.001480418 |
| 0.000250635 | 0.001484311 |
| 0.000250852 | 0.001485253 |
| 0.000251295 | 0.001487531 |

## TAUvsControls

|             |             |
|-------------|-------------|
| 0.000251963 | 0.001491142 |
| 0.000252189 | 0.001492132 |
| 0.000252452 | 0.001493345 |
| 0.000252519 | 0.001493395 |
| 0.00025261  | 0.001493588 |
| 0.000253439 | 0.001498144 |
| 0.000255008 | 0.001507071 |
| 0.000255953 | 0.00151231  |
| 0.000256201 | 0.001513429 |
| 0.000256299 | 0.001513656 |
| 0.000256896 | 0.001516831 |
| 0.000258173 | 0.00152402  |
| 0.000258593 | 0.001526152 |
| 0.000263388 | 0.00155409  |
| 0.000263772 | 0.001555999 |
| 0.000265064 | 0.00156326  |
| 0.000265691 | 0.001566602 |
| 0.00026591  | 0.001567531 |
| 0.000266813 | 0.001572495 |
| 0.000267502 | 0.001576192 |
| 0.000268364 | 0.001580668 |
| 0.000268385 | 0.001580668 |
| 0.000269446 | 0.00158655  |
| 0.000269838 | 0.001588497 |
| 0.000269968 | 0.001588896 |
| 0.000270369 | 0.001590708 |
| 0.0002704   | 0.001590708 |
| 0.000270783 | 0.001592594 |
| 0.000271181 | 0.001594573 |
| 0.000271471 | 0.00159591  |
| 0.000274879 | 0.001615575 |
| 0.000275004 | 0.001615937 |
| 0.000276107 | 0.001622047 |
| 0.0002787   | 0.001636909 |
| 0.000279069 | 0.001638699 |
| 0.000280942 | 0.001649244 |
| 0.000280993 | 0.001649244 |
| 0.000281371 | 0.001651083 |
| 0.000282892 | 0.001659627 |
| 0.000285271 | 0.001673201 |
| 0.000285527 | 0.00167432  |
| 0.000285917 | 0.001676223 |
| 0.000286559 | 0.001679604 |
| 0.000286896 | 0.001680889 |
| 0.00028691  | 0.001680889 |
| 0.000286975 | 0.001680889 |
| 0.000287748 | 0.001685032 |
| 0.000288591 | 0.001689587 |
| 0.000289019 | 0.001691703 |
| 0.00028937  | 0.001693374 |
| 0.000289572 | 0.001694169 |

## TAUvsControls

|             |             |
|-------------|-------------|
| 0.000289784 | 0.001695023 |
| 0.000290359 | 0.001697995 |
| 0.000290639 | 0.001699245 |
| 0.000291257 | 0.001702472 |
| 0.000293404 | 0.001714634 |
| 0.000295262 | 0.001725099 |
| 0.000296722 | 0.001733229 |
| 0.000297952 | 0.001740021 |
| 0.000298044 | 0.001740162 |
| 0.000298116 | 0.001740188 |
| 0.000299721 | 0.001749158 |
| 0.000299858 | 0.001749559 |
| 0.000300281 | 0.00175163  |
| 0.000300565 | 0.001752884 |
| 0.000301108 | 0.001755652 |
| 0.000301669 | 0.001758527 |
| 0.000302959 | 0.001765643 |
| 0.000303093 | 0.001766021 |
| 0.000303839 | 0.001769968 |
| 0.00030405  | 0.001770796 |
| 0.000304922 | 0.00177547  |
| 0.000305066 | 0.001775907 |
| 0.000305588 | 0.001778543 |
| 0.000306921 | 0.001785892 |
| 0.000307888 | 0.001791114 |
| 0.000308333 | 0.001793296 |
| 0.00030994  | 0.001802234 |
| 0.000310058 | 0.001802509 |
| 0.000310571 | 0.001805086 |
| 0.000310827 | 0.001806165 |
| 0.000311181 | 0.001807808 |
| 0.000312681 | 0.001816116 |
| 0.000313118 | 0.00181824  |
| 0.000313381 | 0.001819356 |
| 0.000314799 | 0.001827175 |
| 0.000315075 | 0.001828359 |
| 0.00031542  | 0.001829948 |
| 0.000315563 | 0.001830364 |
| 0.000315671 | 0.001830575 |
| 0.000315747 | 0.001830603 |
| 0.000315906 | 0.001831115 |
| 0.000316295 | 0.001832952 |
| 0.000316506 | 0.00183376  |
| 0.000317401 | 0.001838532 |
| 0.000319153 | 0.001848262 |
| 0.000319753 | 0.001851318 |
| 0.000322377 | 0.001866092 |
| 0.000322782 | 0.001868013 |
| 0.000323447 | 0.00187144  |
| 0.000323764 | 0.00187285  |
| 0.000325485 | 0.00188238  |

## TAUvsControls

|             |             |
|-------------|-------------|
| 0.000326623 | 0.00188836  |
| 0.000326666 | 0.00188836  |
| 0.000327057 | 0.001890196 |
| 0.000327201 | 0.001890601 |
| 0.000328478 | 0.001897553 |
| 0.000328916 | 0.001899653 |
| 0.000330461 | 0.001908148 |
| 0.000331512 | 0.001913788 |
| 0.000332141 | 0.001916983 |
| 0.000333174 | 0.001922514 |
| 0.000333857 | 0.001926022 |
| 0.000333961 | 0.001926187 |
| 0.000334349 | 0.001927993 |
| 0.000334663 | 0.001929369 |
| 0.000335457 | 0.001933512 |
| 0.000337577 | 0.001945297 |
| 0.000337798 | 0.001946135 |
| 0.000339458 | 0.001955258 |
| 0.000339709 | 0.001956265 |
| 0.00034007  | 0.001957443 |
| 0.000340124 | 0.001957443 |
| 0.000340143 | 0.001957443 |
| 0.000340786 | 0.001960705 |
| 0.000341719 | 0.001965631 |
| 0.000342172 | 0.001967795 |
| 0.000343404 | 0.001974441 |
| 0.000343865 | 0.001976534 |
| 0.000343923 | 0.001976534 |
| 0.000344065 | 0.001976908 |
| 0.000344576 | 0.001979404 |
| 0.000344775 | 0.0019801   |
| 0.000345091 | 0.001981475 |
| 0.000345393 | 0.001982765 |
| 0.000346231 | 0.001987127 |
| 0.000347829 | 0.001995856 |
| 0.000348422 | 0.001998808 |
| 0.000350327 | 0.002009288 |
| 0.000350467 | 0.002009641 |
| 0.000353876 | 0.002028739 |
| 0.00035397  | 0.002028822 |
| 0.000354911 | 0.002033758 |
| 0.000356158 | 0.002040449 |
| 0.000356675 | 0.002042956 |
| 0.000357739 | 0.002048593 |
| 0.000358402 | 0.002051931 |
| 0.000360234 | 0.002061962 |
| 0.000360444 | 0.002062702 |
| 0.000360531 | 0.00206274  |
| 0.000361528 | 0.00206798  |
| 0.000361896 | 0.002069626 |
| 0.000362668 | 0.002073578 |



## TAUvsControls

|             |             |
|-------------|-------------|
| 0.000363281 | 0.002076621 |
| 0.000364554 | 0.002083434 |
| 0.000365089 | 0.002086026 |
| 0.000365634 | 0.002088676 |
| 0.000365999 | 0.002090295 |
| 0.000368031 | 0.002101432 |
| 0.000370875 | 0.002117197 |
| 0.00037158  | 0.002120752 |
| 0.000371988 | 0.002122407 |
| 0.000372036 | 0.002122407 |
| 0.000372851 | 0.002126585 |
| 0.000374037 | 0.002132876 |
| 0.000374574 | 0.002135465 |
| 0.000375507 | 0.002140307 |
| 0.000375633 | 0.002140548 |
| 0.000376807 | 0.002146461 |
| 0.000376881 | 0.002146461 |
| 0.000376922 | 0.002146461 |
| 0.000377472 | 0.002149117 |
| 0.000378051 | 0.002151939 |
| 0.000378841 | 0.002155956 |
| 0.000379513 | 0.002159303 |
| 0.000379619 | 0.002159428 |
| 0.000380366 | 0.002163195 |
| 0.000380634 | 0.002164239 |
| 0.000381152 | 0.002166705 |
| 0.00038145  | 0.002167918 |
| 0.000381914 | 0.002169595 |
| 0.000381914 | 0.002169595 |
| 0.000382216 | 0.002170346 |
| 0.000382216 | 0.002170346 |
| 0.00038351  | 0.002177214 |
| 0.000384037 | 0.002179724 |
| 0.000385191 | 0.002185789 |
| 0.000386557 | 0.002193057 |
| 0.000388278 | 0.002202334 |
| 0.000390237 | 0.002212956 |
| 0.000390337 | 0.002213029 |
| 0.000390612 | 0.002214103 |
| 0.00039076  | 0.002214449 |
| 0.000391171 | 0.002216288 |
| 0.00039359  | 0.0022295   |
| 0.000394401 | 0.002233602 |
| 0.00039468  | 0.002234691 |
| 0.000395343 | 0.002237951 |
| 0.000396319 | 0.002242983 |
| 0.000396457 | 0.002243266 |
| 0.000397013 | 0.002245917 |
| 0.000397706 | 0.002249344 |
| 0.000399097 | 0.002256709 |
| 0.000399749 | 0.002259902 |

## TAUvsControls

|             |             |
|-------------|-------------|
| 0.000400648 | 0.002264481 |
| 0.0004049   | 0.002288008 |
| 0.00040546  | 0.002290673 |
| 0.000406287 | 0.002294838 |
| 0.000406632 | 0.002296281 |
| 0.0004101   | 0.002315354 |
| 0.000410211 | 0.002315472 |
| 0.000410878 | 0.002318724 |
| 0.000411636 | 0.002322491 |
| 0.00041187  | 0.002323299 |
| 0.000412549 | 0.002326622 |
| 0.000413481 | 0.002331363 |
| 0.000413576 | 0.002331388 |
| 0.000413668 | 0.002331395 |
| 0.000415402 | 0.002340649 |
| 0.000418313 | 0.002356537 |
| 0.000419201 | 0.002361018 |
| 0.000419677 | 0.002363182 |
| 0.000423545 | 0.002384439 |
| 0.000429306 | 0.00241634  |
| 0.000432824 | 0.002435608 |
| 0.000433213 | 0.002437262 |
| 0.000433569 | 0.002438732 |
| 0.000435274 | 0.002447783 |
| 0.000436758 | 0.002455591 |
| 0.000437073 | 0.002456821 |
| 0.000439529 | 0.002470089 |
| 0.000440389 | 0.002474377 |
| 0.000442502 | 0.002485704 |
| 0.000442664 | 0.002486072 |
| 0.000443089 | 0.002487913 |
| 0.000445286 | 0.002499266 |
| 0.000445306 | 0.002499266 |
| 0.000445713 | 0.002501008 |
| 0.000445856 | 0.002501261 |
| 0.000446442 | 0.002503998 |
| 0.000447615 | 0.002510029 |
| 0.000448234 | 0.002512951 |
| 0.000448413 | 0.002513405 |
| 0.000453839 | 0.002543263 |
| 0.000455871 | 0.00255409  |
| 0.000456647 | 0.002557882 |
| 0.000456805 | 0.002558209 |
| 0.000456997 | 0.002558652 |
| 0.000457169 | 0.002558652 |
| 0.000457184 | 0.002558652 |
| 0.000458014 | 0.002562742 |
| 0.000458196 | 0.0025632   |
| 0.000462863 | 0.00258874  |
| 0.000463202 | 0.002590071 |
| 0.000465612 | 0.002602982 |

## TAUvsControls

|             |             |
|-------------|-------------|
| 0.000466119 | 0.002605249 |
| 0.000467029 | 0.002609765 |
| 0.00046841  | 0.002616911 |
| 0.000469872 | 0.0026235   |
| 0.000469876 | 0.0026235   |
| 0.000469896 | 0.0026235   |
| 0.000472268 | 0.00263606  |
| 0.000472432 | 0.00263606  |
| 0.000472454 | 0.00263606  |
| 0.000473201 | 0.002639654 |
| 0.0004736   | 0.002641305 |
| 0.000474251 | 0.002644363 |
| 0.000474872 | 0.002647251 |
| 0.00047549  | 0.002650116 |
| 0.000475885 | 0.002651744 |
| 0.00047642  | 0.002654147 |
| 0.00047917  | 0.002668887 |
| 0.000479539 | 0.002670365 |
| 0.00048181  | 0.002682425 |
| 0.000484367 | 0.002696081 |
| 0.000484694 | 0.002697316 |
| 0.000486382 | 0.00270612  |
| 0.000486532 | 0.002706366 |
| 0.000486741 | 0.00270694  |
| 0.000488804 | 0.002717826 |
| 0.000488962 | 0.002718115 |
| 0.000489409 | 0.00272001  |
| 0.000490219 | 0.002723923 |
| 0.000490531 | 0.002725065 |
| 0.000490735 | 0.002725101 |
| 0.00049075  | 0.002725101 |
| 0.000491146 | 0.00272671  |
| 0.000492263 | 0.00273232  |
| 0.000493773 | 0.002740108 |
| 0.000494259 | 0.002742215 |
| 0.000495091 | 0.002746235 |
| 0.000496082 | 0.002751135 |
| 0.000496349 | 0.002752024 |
| 0.000499233 | 0.002767412 |
| 0.000500547 | 0.002774097 |
| 0.000502087 | 0.002782032 |
| 0.000502539 | 0.002783933 |
| 0.000504226 | 0.002792679 |
| 0.000504414 | 0.002793115 |
| 0.000504905 | 0.00279508  |
| 0.000505058 | 0.00279508  |
| 0.000505096 | 0.00279508  |
| 0.000508674 | 0.002814111 |
| 0.000508754 | 0.002814111 |
| 0.000510456 | 0.002822915 |
| 0.00051079  | 0.002824156 |

## TAUvsControls

|             |             |
|-------------|-------------|
| 0.000511416 | 0.002826648 |
| 0.000511461 | 0.002826648 |
| 0.000512917 | 0.002834083 |
| 0.000513285 | 0.002835504 |
| 0.000515113 | 0.002844991 |
| 0.000515287 | 0.002845338 |
| 0.000519206 | 0.00286636  |
| 0.000520532 | 0.002873062 |
| 0.000520906 | 0.002874509 |
| 0.000521295 | 0.00287604  |
| 0.000522768 | 0.002883544 |
| 0.000527682 | 0.00290953  |
| 0.000527706 | 0.00290953  |
| 0.000528421 | 0.002912846 |
| 0.000528918 | 0.002914956 |
| 0.000530643 | 0.002923839 |
| 0.000530909 | 0.002924674 |
| 0.000531859 | 0.002929278 |
| 0.000532433 | 0.002931812 |
| 0.000532604 | 0.002932121 |
| 0.000533765 | 0.002937618 |
| 0.000533831 | 0.002937618 |
| 0.000536439 | 0.002951337 |
| 0.000537532 | 0.002956181 |
| 0.00053755  | 0.002956181 |
| 0.000537856 | 0.002957228 |
| 0.000540419 | 0.002970684 |
| 0.000542441 | 0.00298116  |
| 0.000543556 | 0.002986646 |
| 0.000543765 | 0.002987155 |
| 0.000545409 | 0.002995544 |
| 0.000547171 | 0.003004579 |
| 0.000547438 | 0.0030054   |
| 0.000548435 | 0.003010228 |
| 0.000551518 | 0.00302637  |
| 0.000551611 | 0.00302637  |
| 0.000553926 | 0.003037976 |
| 0.000553964 | 0.003037976 |
| 0.000555199 | 0.003044099 |
| 0.000556163 | 0.003048731 |
| 0.000557722 | 0.003056629 |
| 0.000558307 | 0.003059178 |
| 0.000558946 | 0.003062026 |
| 0.000559238 | 0.003062973 |
| 0.000559689 | 0.003064266 |
| 0.000559713 | 0.003064266 |
| 0.000561634 | 0.003074128 |
| 0.000563884 | 0.003085568 |
| 0.000563965 | 0.003085568 |
| 0.000564914 | 0.003090101 |
| 0.000566706 | 0.00309886  |

## TAUvsControls

|             |             |
|-------------|-------------|
| 0.000566853 | 0.00309886  |
| 0.000566878 | 0.00309886  |
| 0.000567796 | 0.003103219 |
| 0.000568394 | 0.003105822 |
| 0.000568628 | 0.003106438 |
| 0.000570558 | 0.00311632  |
| 0.0005724   | 0.003125718 |
| 0.000573955 | 0.003133541 |
| 0.000574093 | 0.003133628 |
| 0.000574483 | 0.003135089 |
| 0.000574894 | 0.003136666 |
| 0.00057752  | 0.003150319 |
| 0.000579353 | 0.003159648 |
| 0.000579561 | 0.00316011  |
| 0.000580534 | 0.003164745 |
| 0.000580954 | 0.003166359 |
| 0.000581779 | 0.003170182 |
| 0.000582151 | 0.003171536 |
| 0.000582496 | 0.003172741 |
| 0.000584323 | 0.003181616 |
| 0.000584373 | 0.003181616 |
| 0.000585136 | 0.003185091 |
| 0.00058981  | 0.003209855 |
| 0.000590289 | 0.003211778 |
| 0.00059331  | 0.003227534 |
| 0.000593963 | 0.003230395 |
| 0.000594418 | 0.003232186 |
| 0.00059511  | 0.003235138 |
| 0.000595213 | 0.003235138 |
| 0.000596693 | 0.003242495 |
| 0.000597351 | 0.003244931 |
| 0.000597394 | 0.003244931 |
| 0.000601505 | 0.003266567 |
| 0.000602012 | 0.003268627 |
| 0.00060339  | 0.003275421 |
| 0.000603646 | 0.003276112 |
| 0.000604614 | 0.003280676 |
| 0.000604997 | 0.003282056 |
| 0.000605888 | 0.003286195 |
| 0.000608027 | 0.003297103 |
| 0.000608183 | 0.003297247 |
| 0.000609028 | 0.003301132 |
| 0.000613297 | 0.003323567 |
| 0.00061372  | 0.003324777 |
| 0.000613779 | 0.003324777 |
| 0.000613992 | 0.003325227 |
| 0.000614306 | 0.003326229 |
| 0.000614512 | 0.003326642 |
| 0.000614825 | 0.00332763  |
| 0.000615088 | 0.003328354 |
| 0.000615506 | 0.00332969  |

## TAUvsControls

|             |             |
|-------------|-------------|
| 0.000615595 | 0.00332969  |
| 0.000618663 | 0.003345582 |
| 0.000620984 | 0.003357423 |
| 0.000621131 | 0.003357513 |
| 0.000621544 | 0.003359035 |
| 0.000622844 | 0.003365354 |
| 0.000624302 | 0.003372521 |
| 0.000625436 | 0.003377933 |
| 0.000626143 | 0.003381043 |
| 0.000626548 | 0.003382322 |
| 0.000626644 | 0.003382322 |
| 0.000628161 | 0.003389799 |
| 0.000628624 | 0.00339129  |
| 0.000628702 | 0.00339129  |
| 0.000628885 | 0.003391564 |
| 0.000630329 | 0.003398633 |
| 0.000631006 | 0.003401297 |
| 0.000631088 | 0.003401297 |
| 0.000633262 | 0.003412298 |
| 0.000633758 | 0.003414098 |
| 0.000633862 | 0.003414098 |
| 0.000635296 | 0.003421104 |
| 0.000638177 | 0.003435893 |
| 0.00063835  | 0.003436106 |
| 0.000641854 | 0.003454243 |
| 0.000642116 | 0.003454926 |
| 0.00064325  | 0.003460303 |
| 0.000643924 | 0.003463199 |
| 0.000644431 | 0.003465203 |
| 0.000648093 | 0.003484164 |
| 0.000648728 | 0.003486844 |
| 0.000649271 | 0.003489032 |
| 0.000650489 | 0.003494846 |
| 0.000651937 | 0.003501891 |
| 0.000652091 | 0.003501983 |
| 0.000652981 | 0.003506032 |
| 0.000653266 | 0.003506825 |
| 0.000653587 | 0.003507817 |
| 0.000654003 | 0.003509316 |
| 0.000654794 | 0.003512132 |
| 0.000654815 | 0.003512132 |
| 0.000654939 | 0.003512132 |
| 0.000655484 | 0.00351432  |
| 0.000656044 | 0.003516588 |
| 0.000656329 | 0.003517332 |
| 0.000656457 | 0.003517332 |
| 0.000657394 | 0.003521615 |
| 0.000658372 | 0.003526119 |
| 0.00065906  | 0.003529066 |
| 0.000660511 | 0.003536099 |
| 0.0006608   | 0.003536907 |

## TAUvsControls

|             |             |
|-------------|-------------|
| 0.000663219 | 0.003549114 |
| 0.000663526 | 0.003549646 |
| 0.000663595 | 0.003549646 |
| 0.000665445 | 0.003558192 |
| 0.000665479 | 0.003558192 |
| 0.000665609 | 0.003558192 |
| 0.000668258 | 0.003571608 |
| 0.000668572 | 0.00357254  |
| 0.000673514 | 0.003598202 |
| 0.000678096 | 0.003621925 |
| 0.0006795   | 0.003628669 |
| 0.000681364 | 0.003637185 |
| 0.000681378 | 0.003637185 |
| 0.000682959 | 0.003644865 |
| 0.000684408 | 0.003651837 |
| 0.000684702 | 0.003652645 |
| 0.000685767 | 0.003657567 |
| 0.00068901  | 0.003674099 |
| 0.000691686 | 0.003687601 |
| 0.000695576 | 0.00370757  |
| 0.000695791 | 0.003707947 |
| 0.000696802 | 0.003712562 |
| 0.00069783  | 0.003717265 |
| 0.000700747 | 0.003732033 |
| 0.000703535 | 0.003746102 |
| 0.000704449 | 0.003750187 |
| 0.000704635 | 0.003750403 |
| 0.000705113 | 0.003751971 |
| 0.000705223 | 0.003751971 |
| 0.000705892 | 0.003754751 |
| 0.000706809 | 0.00375885  |
| 0.000707711 | 0.003762867 |
| 0.000708232 | 0.003764859 |
| 0.000708429 | 0.003765126 |
| 0.000709856 | 0.00377193  |
| 0.000710824 | 0.003776067 |
| 0.000711011 | 0.003776067 |
| 0.000711089 | 0.003776067 |
| 0.000711342 | 0.003776067 |
| 0.000711466 | 0.003776067 |
| 0.000711518 | 0.003776067 |
| 0.000713349 | 0.003785001 |
| 0.000719319 | 0.003815886 |
| 0.000719557 | 0.003816362 |
| 0.00072086  | 0.003822482 |
| 0.000721822 | 0.003826791 |
| 0.000723248 | 0.00383356  |
| 0.000724357 | 0.003838643 |
| 0.000724646 | 0.003839383 |
| 0.000725034 | 0.003840643 |
| 0.000725611 | 0.003842909 |

## TAUvsControls

|             |             |
|-------------|-------------|
| 0.000728385 | 0.003856804 |
| 0.000729538 | 0.003862107 |
| 0.000730378 | 0.003865757 |
| 0.000732038 | 0.003873745 |
| 0.000733726 | 0.003881878 |
| 0.000734305 | 0.003883461 |
| 0.000734328 | 0.003883461 |
| 0.000735758 | 0.00389022  |
| 0.000736789 | 0.00389436  |
| 0.000736845 | 0.00389436  |
| 0.000739479 | 0.003907478 |
| 0.000741598 | 0.003917866 |
| 0.000742005 | 0.003918827 |
| 0.000742085 | 0.003918827 |
| 0.000742365 | 0.003919498 |
| 0.000742808 | 0.003921029 |
| 0.000743396 | 0.003923324 |
| 0.000747567 | 0.003944529 |
| 0.000748535 | 0.003948825 |
| 0.000749465 | 0.003952854 |
| 0.000749607 | 0.003952854 |
| 0.000750336 | 0.003955883 |
| 0.00075058  | 0.003956354 |
| 0.00075152  | 0.003960496 |
| 0.00075391  | 0.003972276 |
| 0.000756715 | 0.003986234 |
| 0.000757828 | 0.003991282 |
| 0.000758769 | 0.003995414 |
| 0.000759593 | 0.003998935 |
| 0.000760422 | 0.004002477 |
| 0.000764463 | 0.00402292  |
| 0.000769344 | 0.004047774 |
| 0.000769866 | 0.004049041 |
| 0.0007699   | 0.004049041 |
| 0.000771596 | 0.004057128 |
| 0.000771906 | 0.004057927 |
| 0.000774723 | 0.004071899 |
| 0.000777651 | 0.004086452 |
| 0.000778801 | 0.00409132  |
| 0.000778897 | 0.00409132  |
| 0.000779503 | 0.004093668 |
| 0.000780652 | 0.004098861 |
| 0.000783529 | 0.004113126 |
| 0.000784501 | 0.004117386 |
| 0.000785287 | 0.004120667 |
| 0.000785733 | 0.004122167 |
| 0.000787301 | 0.004129548 |
| 0.00078806  | 0.004132317 |
| 0.000788151 | 0.004132317 |
| 0.00079266  | 0.004155106 |
| 0.00079472  | 0.004165056 |



## TAUvsControls

|             |             |
|-------------|-------------|
| 0.00079584  | 0.004170072 |
| 0.000796072 | 0.004170436 |
| 0.000796408 | 0.004171346 |
| 0.000796746 | 0.004172263 |
| 0.000798543 | 0.004180821 |
| 0.000801614 | 0.004196042 |
| 0.000804228 | 0.004208864 |
| 0.000806942 | 0.004222207 |
| 0.000807201 | 0.0042227   |
| 0.000807744 | 0.004224677 |
| 0.000808902 | 0.004229871 |
| 0.000810059 | 0.004235058 |
| 0.000810699 | 0.00423754  |
| 0.000813889 | 0.004253351 |
| 0.000814302 | 0.00425464  |
| 0.000814619 | 0.00425543  |
| 0.000814893 | 0.004255994 |
| 0.000817924 | 0.004270957 |
| 0.000818765 | 0.004274478 |
| 0.0008199   | 0.004279533 |
| 0.000820864 | 0.004283689 |
| 0.000821614 | 0.004286735 |
| 0.000822545 | 0.004290715 |
| 0.000823426 | 0.00429444  |
| 0.000823686 | 0.004294922 |
| 0.000824658 | 0.004299119 |
| 0.000824995 | 0.0043      |
| 0.000825367 | 0.004301064 |
| 0.000829091 | 0.004319592 |
| 0.000831375 | 0.004330615 |
| 0.000832685 | 0.004336555 |
| 0.00083422  | 0.004343669 |
| 0.000835393 | 0.004348894 |
| 0.0008363   | 0.004352731 |
| 0.000837087 | 0.00435541  |
| 0.000837154 | 0.00435541  |
| 0.000838354 | 0.004360766 |
| 0.000839009 | 0.004363291 |
| 0.000840477 | 0.004369406 |
| 0.000840526 | 0.004369406 |
| 0.000840704 | 0.004369448 |
| 0.000841388 | 0.004372116 |
| 0.000842071 | 0.004374778 |
| 0.000844959 | 0.004388893 |
| 0.000848045 | 0.004404032 |
| 0.000849355 | 0.004409939 |
| 0.000855101 | 0.004438875 |
| 0.000855298 | 0.004439    |
| 0.000857302 | 0.004448499 |
| 0.000860955 | 0.004466554 |
| 0.000865321 | 0.004488297 |

## TAUvsControls

|             |             |
|-------------|-------------|
| 0.00086688  | 0.00449547  |
| 0.000867252 | 0.004496492 |
| 0.00086763  | 0.004497544 |
| 0.000869496 | 0.004506307 |
| 0.000870022 | 0.004508122 |
| 0.000870451 | 0.00450943  |
| 0.00087328  | 0.004523173 |
| 0.000875393 | 0.004533204 |
| 0.000877402 | 0.004542174 |
| 0.00087748  | 0.004542174 |
| 0.000880281 | 0.004555755 |
| 0.000881641 | 0.004561875 |
| 0.000882623 | 0.004566035 |
| 0.000882833 | 0.004566197 |
| 0.000884248 | 0.004572594 |
| 0.000887775 | 0.004589912 |
| 0.000891855 | 0.004610073 |
| 0.000894331 | 0.004621941 |
| 0.000903939 | 0.004670655 |
| 0.000909854 | 0.004700271 |
| 0.000910786 | 0.00470414  |
| 0.000913314 | 0.004716247 |
| 0.000913757 | 0.004717583 |
| 0.000919024 | 0.004743823 |
| 0.000924247 | 0.004769824 |
| 0.000926148 | 0.004778484 |
| 0.000926298 | 0.004778484 |
| 0.000929138 | 0.00479217  |
| 0.00093189  | 0.004805399 |
| 0.000934259 | 0.004816645 |
| 0.000935064 | 0.004819826 |
| 0.000938016 | 0.004834069 |
| 0.000939106 | 0.004838068 |
| 0.000939356 | 0.004838068 |
| 0.000939358 | 0.004838068 |
| 0.000939746 | 0.0048391   |
| 0.000940392 | 0.004841454 |
| 0.000943463 | 0.004856288 |
| 0.000945653 | 0.004866583 |
| 0.000946195 | 0.004868398 |
| 0.000947062 | 0.004871882 |
| 0.000949701 | 0.004884476 |
| 0.000952582 | 0.004898313 |
| 0.000953845 | 0.004903822 |
| 0.000955016 | 0.004908858 |
| 0.000958125 | 0.00492325  |
| 0.0009582   | 0.00492325  |
| 0.000959104 | 0.004926908 |
| 0.000960476 | 0.004932972 |
| 0.000963618 | 0.004948118 |
| 0.000964943 | 0.004953927 |

## TAUvsControls

|             |             |
|-------------|-------------|
| 0.000967422 | 0.004965661 |
| 0.000967999 | 0.004967629 |
| 0.000970034 | 0.004976533 |
| 0.000970122 | 0.004976533 |
| 0.000972592 | 0.004988205 |
| 0.000973413 | 0.004991418 |
| 0.000974715 | 0.004997094 |
| 0.000974972 | 0.004997412 |
| 0.000975828 | 0.005000657 |
| 0.000975995 | 0.005000657 |
| 0.000978367 | 0.005011094 |
| 0.000978423 | 0.005011094 |
| 0.000979018 | 0.005013142 |
| 0.000987401 | 0.00505506  |
| 0.000990828 | 0.005070984 |
| 0.000990907 | 0.005070984 |
| 0.000992703 | 0.005079164 |
| 0.000995491 | 0.005091747 |
| 0.00099556  | 0.005091747 |
| 0.000997842 | 0.005102404 |
| 0.000998138 | 0.005102896 |
| 0.000998435 | 0.005103398 |
| 0.00099977  | 0.005108793 |
| 0.000999889 | 0.005108793 |
| 0.001001833 | 0.005117706 |
| 0.00100247  | 0.005119941 |
| 0.001002754 | 0.005120374 |
| 0.00100399  | 0.005125664 |
| 0.001006645 | 0.005138199 |
| 0.001007135 | 0.005139677 |
| 0.001007829 | 0.005141475 |
| 0.001007955 | 0.005141475 |
| 0.001008089 | 0.005141475 |
| 0.001012698 | 0.005163953 |
| 0.001021735 | 0.005208055 |
| 0.001021889 | 0.005208055 |
| 0.001021956 | 0.005208055 |
| 0.001025842 | 0.005226613 |
| 0.001026005 | 0.005226613 |
| 0.001027032 | 0.005229958 |
| 0.001027069 | 0.005229958 |
| 0.001028526 | 0.005236335 |
| 0.001029106 | 0.00523825  |
| 0.001030436 | 0.005243977 |
| 0.001031548 | 0.005248598 |
| 0.001032256 | 0.005250563 |
| 0.001032344 | 0.005250563 |
| 0.001033136 | 0.00525355  |
| 0.001037671 | 0.005275565 |
| 0.001041264 | 0.005292784 |
| 0.001042847 | 0.005299777 |

## TAUvsControls

|             |             |
|-------------|-------------|
| 0.001043322 | 0.00530114  |
| 0.001048099 | 0.005324357 |
| 0.00105127  | 0.005339409 |
| 0.001052499 | 0.005344593 |
| 0.001055885 | 0.005360725 |
| 0.001056917 | 0.005364903 |
| 0.001059967 | 0.005379321 |
| 0.001062064 | 0.005388897 |
| 0.001063663 | 0.005395943 |
| 0.001064729 | 0.005400285 |
| 0.001065833 | 0.005404816 |
| 0.001066054 | 0.00540483  |
| 0.001066258 | 0.00540483  |
| 0.001066851 | 0.005406769 |
| 0.00106883  | 0.00541573  |
| 0.001073588 | 0.005438763 |
| 0.001074327 | 0.005441432 |
| 0.001075802 | 0.005447827 |
| 0.001078214 | 0.005458966 |
| 0.001079116 | 0.005462451 |
| 0.001086252 | 0.005497491 |
| 0.001087196 | 0.005501179 |
| 0.00108783  | 0.005503305 |
| 0.001089362 | 0.005509969 |
| 0.001090291 | 0.00551358  |
| 0.001091444 | 0.005518324 |
| 0.00109443  | 0.005532329 |
| 0.001096799 | 0.005543209 |
| 0.001104512 | 0.005581094 |
| 0.00110877  | 0.005601117 |
| 0.001108912 | 0.005601117 |
| 0.001110307 | 0.00560706  |
| 0.001111865 | 0.005613822 |
| 0.001116509 | 0.005636164 |
| 0.001119523 | 0.005650265 |
| 0.001122078 | 0.005662046 |
| 0.001125074 | 0.005676049 |
| 0.001128247 | 0.005690934 |
| 0.00113022  | 0.005699768 |
| 0.001130995 | 0.005702552 |
| 0.001135693 | 0.005725114 |
| 0.001137786 | 0.005734538 |
| 0.001139268 | 0.005740883 |
| 0.001141121 | 0.00574909  |
| 0.001142833 | 0.005756585 |
| 0.00114377  | 0.005760171 |
| 0.001144251 | 0.005761462 |
| 0.001146087 | 0.005769576 |
| 0.001148384 | 0.005780003 |
| 0.001149419 | 0.005784079 |
| 0.001149867 | 0.005785197 |

## TAUvsControls

|             |             |
|-------------|-------------|
| 0.001150461 | 0.005787051 |
| 0.0011511   | 0.005789129 |
| 0.001152454 | 0.005794806 |
| 0.00115615  | 0.00581225  |
| 0.001156429 | 0.005812514 |
| 0.001163284 | 0.00584582  |
| 0.001164909 | 0.005852842 |
| 0.001167247 | 0.005863439 |
| 0.001170939 | 0.005880835 |
| 0.001171895 | 0.005884483 |
| 0.001172178 | 0.00588475  |
| 0.001173695 | 0.005891213 |
| 0.001174774 | 0.005895474 |
| 0.001175516 | 0.005898044 |
| 0.001177182 | 0.005905248 |
| 0.0011795   | 0.005915721 |
| 0.001180386 | 0.005919006 |
| 0.001187718 | 0.00595461  |
| 0.001188504 | 0.005957385 |
| 0.001196471 | 0.005996148 |
| 0.001198636 | 0.006005823 |
| 0.001205447 | 0.006038773 |
| 0.001211966 | 0.006070246 |
| 0.001216101 | 0.006089766 |
| 0.001217941 | 0.00609779  |
| 0.001219209 | 0.006102946 |
| 0.001229365 | 0.006152583 |
| 0.001234138 | 0.006175265 |
| 0.001235559 | 0.006181167 |
| 0.001237052 | 0.006187431 |
| 0.001238692 | 0.006194424 |
| 0.001239211 | 0.006195815 |
| 0.00124696  | 0.006233324 |
| 0.001247233 | 0.006233324 |
| 0.001247442 | 0.006233324 |
| 0.001248805 | 0.006238916 |
| 0.001250779 | 0.006247563 |
| 0.001251602 | 0.006250458 |
| 0.001253836 | 0.006260395 |
| 0.001255305 | 0.006266507 |
| 0.001257251 | 0.006275    |
| 0.001263009 | 0.006302514 |
| 0.001264642 | 0.006309437 |
| 0.001269453 | 0.006332207 |
| 0.001272313 | 0.00634524  |
| 0.001273271 | 0.006348779 |
| 0.001275331 | 0.006357817 |
| 0.001279501 | 0.006377278 |
| 0.001279732 | 0.006377278 |
| 0.001280648 | 0.006380603 |
| 0.001284541 | 0.006398757 |

## TAUvsControls

|             |             |
|-------------|-------------|
| 0.001286177 | 0.006405659 |
| 0.001290499 | 0.006425938 |
| 0.001290873 | 0.006426556 |
| 0.001294611 | 0.006443911 |
| 0.001294935 | 0.006444274 |
| 0.001295698 | 0.006446818 |
| 0.001297712 | 0.00645559  |
| 0.001303485 | 0.006481985 |
| 0.001303524 | 0.006481985 |
| 0.001306327 | 0.006494668 |
| 0.00130665  | 0.006495014 |
| 0.001308075 | 0.006500836 |
| 0.00130893  | 0.006503825 |
| 0.00131164  | 0.006516029 |
| 0.001313533 | 0.006524171 |
| 0.001315699 | 0.00653366  |
| 0.001315996 | 0.006533873 |
| 0.001316537 | 0.00653529  |
| 0.001318507 | 0.006543804 |
| 0.001319571 | 0.006547817 |
| 0.001320601 | 0.006551663 |
| 0.001321744 | 0.006556062 |
| 0.001322012 | 0.006556125 |
| 0.001324523 | 0.006567309 |
| 0.001324915 | 0.006567982 |
| 0.00133272  | 0.006605397 |
| 0.001334908 | 0.006614963 |
| 0.001347135 | 0.006673702 |
| 0.001347282 | 0.006673702 |
| 0.001351703 | 0.006694309 |
| 0.001354736 | 0.006708035 |
| 0.001360153 | 0.006733556 |
| 0.00136084  | 0.006735661 |
| 0.001364114 | 0.006750562 |
| 0.00136535  | 0.006755374 |
| 0.001366604 | 0.006760274 |
| 0.001368657 | 0.006769127 |
| 0.001370574 | 0.006777301 |
| 0.001374632 | 0.006796055 |
| 0.001376187 | 0.006802434 |
| 0.001376912 | 0.006804704 |
| 0.001378316 | 0.006810332 |
| 0.001379618 | 0.006815451 |
| 0.001380035 | 0.006816115 |
| 0.001380284 | 0.006816115 |
| 0.001384239 | 0.006834332 |
| 0.001384726 | 0.006835419 |
| 0.001388224 | 0.006851366 |
| 0.001388863 | 0.006853202 |
| 0.001389296 | 0.006854021 |
| 0.001391643 | 0.006864278 |

## TAUvsControls

|             |             |
|-------------|-------------|
| 0.00139359  | 0.00687256  |
| 0.001398462 | 0.006895263 |
| 0.001405517 | 0.006928715 |
| 0.001408065 | 0.006939941 |
| 0.001410303 | 0.006947641 |
| 0.001410412 | 0.006947641 |
| 0.00141044  | 0.006947641 |
| 0.001413563 | 0.006961691 |
| 0.001413997 | 0.006962491 |
| 0.001415696 | 0.006969519 |
| 0.001416103 | 0.006970183 |
| 0.001422771 | 0.007001659 |
| 0.001423749 | 0.007005129 |
| 0.001424059 | 0.00700531  |
| 0.001429686 | 0.007031641 |
| 0.001432956 | 0.007046372 |
| 0.001434015 | 0.007050229 |
| 0.001439161 | 0.007074175 |
| 0.001444352 | 0.007098332 |
| 0.001448678 | 0.007118227 |
| 0.001449557 | 0.007121181 |
| 0.001451356 | 0.007128655 |
| 0.001454668 | 0.007143552 |
| 0.00145923  | 0.007164587 |
| 0.001466105 | 0.007196963 |
| 0.001466859 | 0.007199285 |
| 0.001467488 | 0.007200993 |
| 0.001468264 | 0.007203427 |
| 0.001468712 | 0.007204243 |
| 0.001471825 | 0.007218133 |
| 0.001472638 | 0.00722074  |
| 0.001477041 | 0.007240943 |
| 0.001477521 | 0.007241912 |
| 0.001477853 | 0.007242157 |
| 0.001479719 | 0.007249918 |
| 0.001481042 | 0.007255013 |
| 0.001485298 | 0.00727447  |
| 0.001486154 | 0.007277274 |
| 0.001490212 | 0.007295752 |
| 0.001493787 | 0.007311862 |
| 0.001496244 | 0.00732249  |
| 0.001499127 | 0.007335199 |
| 0.00150169  | 0.007346336 |
| 0.001504497 | 0.007358668 |
| 0.00150516  | 0.007360506 |
| 0.001506101 | 0.007363701 |
| 0.00151089  | 0.007385709 |
| 0.001512924 | 0.007394244 |
| 0.001513676 | 0.007396507 |
| 0.001514383 | 0.007398553 |
| 0.001514684 | 0.007398614 |

## TAUvsControls

|             |             |
|-------------|-------------|
| 0.001525014 | 0.007447656 |
| 0.0015257   | 0.007449585 |
| 0.001526012 | 0.007449694 |
| 0.001527384 | 0.007454969 |
| 0.001531936 | 0.007475768 |
| 0.001534499 | 0.007486847 |
| 0.001535809 | 0.007491815 |
| 0.001536783 | 0.00749514  |
| 0.001537163 | 0.007495568 |
| 0.001539683 | 0.00750643  |
| 0.001540682 | 0.007509874 |
| 0.001543624 | 0.007522784 |
| 0.00154409  | 0.007523623 |
| 0.001552305 | 0.007562215 |
| 0.001555189 | 0.007574826 |
| 0.001556608 | 0.007580302 |
| 0.001558378 | 0.007587477 |
| 0.001559868 | 0.007593291 |
| 0.001563187 | 0.007608006 |
| 0.00156529  | 0.007615358 |
| 0.001565292 | 0.007615358 |
| 0.001572548 | 0.007649209 |
| 0.001572877 | 0.00764936  |
| 0.001574413 | 0.007655378 |
| 0.001575815 | 0.007660742 |
| 0.001577164 | 0.007665848 |
| 0.001579678 | 0.007676611 |
| 0.001590422 | 0.007727358 |
| 0.001592282 | 0.007734063 |
| 0.001592405 | 0.007734063 |
| 0.001593607 | 0.007738438 |
| 0.001595419 | 0.007745771 |
| 0.001598922 | 0.007761306 |
| 0.001600881 | 0.007769348 |
| 0.001603387 | 0.007780035 |
| 0.001610556 | 0.007813344 |
| 0.00161191  | 0.007818433 |
| 0.001615175 | 0.00783279  |
| 0.001623982 | 0.007874008 |
| 0.00162752  | 0.007889672 |
| 0.001628988 | 0.007895297 |
| 0.001635447 | 0.007925107 |
| 0.001640123 | 0.007946262 |
| 0.001640992 | 0.007948971 |
| 0.001641395 | 0.007949423 |
| 0.001641961 | 0.007950661 |
| 0.001642331 | 0.007950955 |
| 0.001642963 | 0.007952511 |
| 0.001643712 | 0.007954633 |
| 0.001646758 | 0.007967873 |
| 0.001649726 | 0.007980727 |



## TAUvsControls

|             |             |
|-------------|-------------|
| 0.001662913 | 0.008043005 |
| 0.001671118 | 0.008081166 |
| 0.001672912 | 0.008088318 |
| 0.001674113 | 0.008092599 |
| 0.001685006 | 0.008143721 |
| 0.001685634 | 0.008145219 |
| 0.001689778 | 0.008163705 |
| 0.001699925 | 0.008211183 |
| 0.00170623  | 0.00824005  |
| 0.001706544 | 0.00824005  |
| 0.001711275 | 0.008261337 |
| 0.00171283  | 0.00826729  |
| 0.001715113 | 0.00827675  |
| 0.001718273 | 0.008290442 |
| 0.001718795 | 0.008291398 |
| 0.001719171 | 0.008291655 |
| 0.001720972 | 0.008298781 |
| 0.001721826 | 0.008301335 |
| 0.001725826 | 0.008319057 |
| 0.001727956 | 0.008326957 |
| 0.001728263 | 0.008326957 |
| 0.001728439 | 0.008326957 |
| 0.00172938  | 0.008329927 |
| 0.001730327 | 0.008332924 |
| 0.001731606 | 0.00833752  |
| 0.001734452 | 0.008349655 |
| 0.001736459 | 0.008357746 |
| 0.001740084 | 0.008373622 |
| 0.001742554 | 0.008383301 |
| 0.001742749 | 0.008383301 |
| 0.00174613  | 0.008397993 |
| 0.001752769 | 0.008426925 |
| 0.001752803 | 0.008426925 |
| 0.001755447 | 0.008438053 |
| 0.001757233 | 0.008445057 |
| 0.001757867 | 0.008446523 |
| 0.001758591 | 0.008448417 |
| 0.001761088 | 0.00845883  |
| 0.001761968 | 0.008461472 |
| 0.001764276 | 0.008470968 |
| 0.001765755 | 0.008476481 |
| 0.001766601 | 0.008478956 |
| 0.001778832 | 0.008536065 |
| 0.001789017 | 0.008583331 |
| 0.001791728 | 0.008593202 |
| 0.001791744 | 0.008593202 |
| 0.001803669 | 0.008648776 |
| 0.001804218 | 0.008649792 |
| 0.001808179 | 0.008667164 |
| 0.001811415 | 0.008681052 |
| 0.001819078 | 0.00871518  |

## TAUvsControls

|             |             |
|-------------|-------------|
| 0.001819216 | 0.00871518  |
| 0.001821387 | 0.008723949 |
| 0.001823502 | 0.008732448 |
| 0.001828589 | 0.008755176 |
| 0.001838334 | 0.008800192 |
| 0.001840741 | 0.008810072 |
| 0.001841833 | 0.008813654 |
| 0.001845144 | 0.008827851 |
| 0.00184617  | 0.008831111 |
| 0.001848579 | 0.008840987 |
| 0.001851698 | 0.008853058 |
| 0.001851794 | 0.008853058 |
| 0.001852894 | 0.008856669 |
| 0.001855083 | 0.00886548  |
| 0.001857652 | 0.008876101 |
| 0.001859014 | 0.008880957 |
| 0.001861006 | 0.008888815 |
| 0.001871525 | 0.00893665  |
| 0.001871718 | 0.00893665  |
| 0.001872374 | 0.008938119 |
| 0.001872816 | 0.008938555 |
| 0.001873162 | 0.008938555 |
| 0.001874282 | 0.008942168 |
| 0.001874616 | 0.008942168 |
| 0.001875413 | 0.008944305 |
| 0.001876471 | 0.008947687 |
| 0.001879581 | 0.008960849 |
| 0.001885091 | 0.008985451 |
| 0.001886041 | 0.008988308 |
| 0.001890199 | 0.009006449 |
| 0.001891004 | 0.009008609 |
| 0.001892284 | 0.009013036 |
| 0.001894541 | 0.00902211  |
| 0.001900543 | 0.00904901  |
| 0.001902928 | 0.009058685 |
| 0.00190354  | 0.009059615 |
| 0.001904065 | 0.009059615 |
| 0.001904183 | 0.009059615 |
| 0.001907105 | 0.009071835 |
| 0.001908411 | 0.00907621  |
| 0.001908732 | 0.00907621  |
| 0.00190947  | 0.009078037 |
| 0.001911764 | 0.009086676 |
| 0.001911996 | 0.009086676 |
| 0.001915532 | 0.009101796 |
| 0.001922362 | 0.009132557 |
| 0.001925788 | 0.009147135 |
| 0.001926252 | 0.009147644 |
| 0.001926647 | 0.009147829 |
| 0.001927493 | 0.009150151 |
| 0.001932345 | 0.009171488 |

## TAUvsControls

|             |             |
|-------------|-------------|
| 0.001936376 | 0.009188918 |
| 0.001936923 | 0.009189816 |
| 0.001937809 | 0.009192316 |
| 0.001941513 | 0.009208185 |
| 0.001943339 | 0.00921514  |
| 0.0019443   | 0.009217992 |
| 0.001947825 | 0.009232998 |
| 0.001949186 | 0.009237745 |
| 0.001954221 | 0.009259896 |
| 0.001955513 | 0.009264307 |
| 0.001958622 | 0.00927732  |
| 0.001959952 | 0.009281909 |
| 0.00196215  | 0.009290603 |
| 0.001964197 | 0.009298578 |
| 0.001967058 | 0.009310402 |
| 0.00196788  | 0.009312574 |
| 0.001969838 | 0.009320122 |
| 0.001973357 | 0.009335048 |
| 0.001975971 | 0.009345691 |
| 0.001979235 | 0.009358878 |
| 0.001979489 | 0.009358878 |
| 0.001983035 | 0.009373918 |
| 0.001986574 | 0.009388916 |
| 0.001988398 | 0.009395805 |
| 0.001994717 | 0.009423926 |
| 0.001997045 | 0.009433179 |
| 0.00199776  | 0.009433179 |
| 0.001997908 | 0.009433179 |
| 0.001998147 | 0.009433179 |
| 0.001998675 | 0.009433938 |
| 0.002006467 | 0.009468972 |
| 0.002008272 | 0.009474842 |
| 0.002008449 | 0.009474842 |
| 0.002008913 | 0.009475289 |
| 0.002011207 | 0.009484362 |
| 0.002017969 | 0.0095145   |
| 0.002019327 | 0.009519156 |
| 0.002024574 | 0.009542136 |
| 0.002026781 | 0.00955078  |
| 0.002028845 | 0.009558754 |
| 0.002029279 | 0.00955904  |
| 0.002030106 | 0.009561183 |
| 0.002030808 | 0.009562731 |
| 0.002032722 | 0.009569985 |
| 0.002037531 | 0.009589275 |
| 0.002037567 | 0.009589275 |
| 0.00203809  | 0.009589979 |
| 0.002039372 | 0.009594249 |
| 0.002043592 | 0.009612341 |
| 0.002047742 | 0.009629019 |
| 0.002048037 | 0.009629019 |

## TAUvsControls

|             |             |
|-------------|-------------|
| 0.002048264 | 0.009629019 |
| 0.002048728 | 0.009629433 |
| 0.002050252 | 0.00963249  |
| 0.002050276 | 0.00963249  |
| 0.002051184 | 0.00963249  |
| 0.002051214 | 0.00963249  |
| 0.002051256 | 0.00963249  |
| 0.00205193  | 0.00963389  |
| 0.002053589 | 0.009639915 |
| 0.002054853 | 0.009644084 |
| 0.002062361 | 0.009677554 |
| 0.002067308 | 0.009698989 |
| 0.002069772 | 0.009708466 |
| 0.002070085 | 0.009708466 |
| 0.002073858 | 0.009724384 |
| 0.002077889 | 0.009741506 |
| 0.002078614 | 0.009743124 |
| 0.002090939 | 0.009799105 |
| 0.002092971 | 0.009806833 |
| 0.002099686 | 0.009835968 |
| 0.002099956 | 0.009835968 |
| 0.00210399  | 0.009853067 |
| 0.002105522 | 0.009858438 |
| 0.002106446 | 0.009859314 |
| 0.002106477 | 0.009859314 |
| 0.002107512 | 0.009862355 |
| 0.002108393 | 0.009864678 |
| 0.002110021 | 0.009870497 |
| 0.002111206 | 0.00987424  |
| 0.002112112 | 0.009876676 |
| 0.002113755 | 0.009882558 |
| 0.002120078 | 0.009910313 |
| 0.002121097 | 0.00991327  |
| 0.00212272  | 0.009919048 |
| 0.00212745  | 0.009939339 |
| 0.002128887 | 0.009944242 |
| 0.002132723 | 0.009959378 |
| 0.002132904 | 0.009959378 |
| 0.002137053 | 0.009976935 |
| 0.002137475 | 0.009977088 |
| 0.002138398 | 0.00997958  |
| 0.002140741 | 0.009988695 |
| 0.002142703 | 0.009996033 |
| 0.002145342 | 0.010006522 |
| 0.002146577 | 0.010010466 |
| 0.002148879 | 0.010019378 |
| 0.002150221 | 0.010022123 |
| 0.002150249 | 0.010022123 |
| 0.002155004 | 0.010042459 |
| 0.002157878 | 0.010054025 |
| 0.002158691 | 0.010055108 |

## TAUvsControls

|             |             |
|-------------|-------------|
| 0.002158894 | 0.010055108 |
| 0.002164197 | 0.010077976 |
| 0.002169552 | 0.010101079 |
| 0.002169998 | 0.010101319 |
| 0.002171591 | 0.010106902 |
| 0.002175363 | 0.010122623 |
| 0.002176689 | 0.010126952 |
| 0.002182547 | 0.010152365 |
| 0.002184147 | 0.010157968 |
| 0.002186925 | 0.010169041 |
| 0.002189601 | 0.010179639 |
| 0.002193676 | 0.010196738 |
| 0.002194472 | 0.010198336 |
| 0.002194815 | 0.010198336 |
| 0.002197516 | 0.010209038 |
| 0.002199971 | 0.010218589 |
| 0.002200585 | 0.010219589 |
| 0.002201011 | 0.010219719 |
| 0.002209328 | 0.010256479 |
| 0.00222311  | 0.010318595 |
| 0.00222545  | 0.010327586 |
| 0.002228062 | 0.010337839 |
| 0.002233325 | 0.010360384 |
| 0.002235348 | 0.010367893 |
| 0.002239538 | 0.010385446 |
| 0.00224152  | 0.010392759 |
| 0.002241993 | 0.010393076 |
| 0.002243244 | 0.010396994 |
| 0.002256087 | 0.010454631 |
| 0.002260462 | 0.010473011 |
| 0.00226639  | 0.010498579 |
| 0.002270268 | 0.010513965 |
| 0.002270531 | 0.010513965 |
| 0.002271913 | 0.010518463 |
| 0.002285238 | 0.010578247 |
| 0.002286076 | 0.010580219 |
| 0.002286801 | 0.010581664 |
| 0.002287851 | 0.010584613 |
| 0.002289593 | 0.01059076  |
| 0.002300325 | 0.010637705 |
| 0.002300571 | 0.010637705 |
| 0.002301377 | 0.010639515 |
| 0.002304875 | 0.010653763 |
| 0.002309848 | 0.010674829 |
| 0.002310405 | 0.010675478 |
| 0.002316191 | 0.010700285 |
| 0.00231744  | 0.010703281 |
| 0.002317674 | 0.010703281 |
| 0.002326946 | 0.010744163 |
| 0.00233048  | 0.010758546 |
| 0.002331188 | 0.010759879 |

## TAUvsControls

|             |             |
|-------------|-------------|
| 0.002332957 | 0.010766104 |
| 0.002335879 | 0.010777649 |
| 0.002339946 | 0.010794475 |
| 0.002349856 | 0.010838239 |
| 0.002353099 | 0.010851249 |
| 0.002355018 | 0.010858142 |
| 0.002356442 | 0.010862759 |
| 0.002356894 | 0.010862889 |
| 0.002359954 | 0.010875036 |
| 0.002365157 | 0.010897055 |
| 0.002367049 | 0.010903804 |
| 0.002367472 | 0.010903804 |
| 0.002369926 | 0.01091315  |
| 0.002373819 | 0.01092911  |
| 0.002375313 | 0.010932492 |
| 0.002375406 | 0.010932492 |
| 0.002382876 | 0.010964906 |
| 0.002383753 | 0.010966819 |
| 0.002384147 | 0.010966819 |
| 0.002391626 | 0.010997278 |
| 0.002392819 | 0.011000793 |
| 0.002406047 | 0.011059621 |
| 0.002410259 | 0.011076841 |
| 0.002410657 | 0.011076841 |
| 0.002413684 | 0.011088766 |
| 0.002415408 | 0.011094701 |
| 0.002421384 | 0.011120158 |
| 0.002426478 | 0.011141558 |
| 0.002427723 | 0.011145276 |
| 0.0024306   | 0.011156489 |
| 0.002432615 | 0.011163742 |
| 0.002438161 | 0.011187191 |
| 0.002439    | 0.011189036 |
| 0.002439866 | 0.011191007 |
| 0.002445443 | 0.011214586 |
| 0.002447494 | 0.011221985 |
| 0.002449249 | 0.011226268 |
| 0.002449304 | 0.011226268 |
| 0.002451791 | 0.011235659 |
| 0.002455702 | 0.011251571 |
| 0.002464307 | 0.011288983 |
| 0.002468582 | 0.011306548 |
| 0.00246932  | 0.011307907 |
| 0.002474408 | 0.011329183 |
| 0.002476394 | 0.011336256 |
| 0.002480736 | 0.011354103 |
| 0.002481579 | 0.011355936 |
| 0.002492366 | 0.011403263 |
| 0.00249672  | 0.011421146 |
| 0.002503591 | 0.011450535 |
| 0.002508    | 0.011468655 |

## TAUvsControls

|             |             |
|-------------|-------------|
| 0.002510574 | 0.011478378 |
| 0.002513864 | 0.011491372 |
| 0.002516315 | 0.01149921  |
| 0.002516475 | 0.01149921  |
| 0.002517755 | 0.011503008 |
| 0.002519145 | 0.011507313 |
| 0.002520271 | 0.011510406 |
| 0.002521348 | 0.011513272 |
| 0.002521801 | 0.011513293 |
| 0.002527838 | 0.011538799 |
| 0.002530777 | 0.011550162 |
| 0.002544917 | 0.01161203  |
| 0.002545239 | 0.01161203  |
| 0.00254609  | 0.011613849 |
| 0.002552386 | 0.011640495 |
| 0.00255389  | 0.011645287 |
| 0.002554888 | 0.011647765 |
| 0.002555991 | 0.01165072  |
| 0.002558785 | 0.011661387 |
| 0.002571132 | 0.011715573 |
| 0.002576028 | 0.011735799 |
| 0.002577623 | 0.01174098  |
| 0.00258691  | 0.011781187 |
| 0.002594093 | 0.011810519 |
| 0.002594271 | 0.011810519 |
| 0.002601363 | 0.011840702 |
| 0.002614264 | 0.011897313 |
| 0.002615698 | 0.011901729 |
| 0.002618524 | 0.011912472 |
| 0.002622302 | 0.011926681 |
| 0.002622577 | 0.011926681 |
| 0.002623512 | 0.011927914 |
| 0.002623778 | 0.011927914 |
| 0.002626527 | 0.011938295 |
| 0.002628059 | 0.01194248  |
| 0.002628379 | 0.01194248  |
| 0.002630437 | 0.011949711 |
| 0.002631055 | 0.011949711 |
| 0.002631368 | 0.011949711 |
| 0.002633771 | 0.011958505 |
| 0.002636099 | 0.011966658 |
| 0.0026365   | 0.011966658 |
| 0.002639958 | 0.011980233 |
| 0.002642026 | 0.011987498 |
| 0.002648224 | 0.012013492 |
| 0.002650654 | 0.012022392 |
| 0.00265142  | 0.012023741 |
| 0.002652146 | 0.012024905 |
| 0.002654699 | 0.012034352 |
| 0.002655554 | 0.012036101 |
| 0.002662015 | 0.012063257 |

## TAUvsControls

|             |             |
|-------------|-------------|
| 0.002662698 | 0.012064219 |
| 0.002666649 | 0.012079988 |
| 0.002670267 | 0.012092479 |
| 0.002670562 | 0.012092479 |
| 0.002670821 | 0.012092479 |
| 0.002673106 | 0.012100688 |
| 0.002698759 | 0.012214658 |
| 0.002704004 | 0.012236236 |
| 0.002705162 | 0.012237941 |
| 0.002705335 | 0.012237941 |
| 0.002717083 | 0.012288919 |
| 0.002719498 | 0.012297674 |
| 0.002733342 | 0.0123581   |
| 0.002742931 | 0.012399265 |
| 0.002744684 | 0.012405002 |
| 0.002745424 | 0.012406161 |
| 0.002747353 | 0.012412692 |
| 0.002748268 | 0.012414642 |
| 0.002748846 | 0.012415066 |
| 0.002753272 | 0.012432864 |
| 0.002756828 | 0.01244673  |
| 0.002769346 | 0.01250105  |
| 0.002770677 | 0.012504857 |
| 0.002773848 | 0.012515966 |
| 0.002774115 | 0.012515966 |
| 0.002776727 | 0.01252555  |
| 0.002781128 | 0.012543195 |
| 0.002785099 | 0.012558898 |
| 0.002787448 | 0.012567238 |
| 0.002788086 | 0.012567238 |
| 0.002788579 | 0.012567238 |
| 0.002788909 | 0.012567238 |
| 0.00279577  | 0.012595945 |
| 0.002800497 | 0.012615023 |
| 0.002801122 | 0.012615626 |
| 0.002803881 | 0.012625832 |
| 0.002804409 | 0.012625993 |
| 0.002806223 | 0.012631942 |
| 0.002813262 | 0.012661406 |
| 0.002814235 | 0.012663562 |
| 0.002820958 | 0.012691589 |
| 0.00283107  | 0.012734848 |
| 0.002846459 | 0.012801827 |
| 0.002863522 | 0.012876311 |
| 0.002864131 | 0.012876791 |
| 0.002866009 | 0.012882978 |
| 0.002875127 | 0.012921698 |
| 0.002880031 | 0.012941469 |
| 0.002886481 | 0.012968182 |
| 0.002892213 | 0.01299166  |
| 0.002893127 | 0.012993489 |



## TAUvsControls

|             |             |
|-------------|-------------|
| 0.00290123  | 0.013027598 |
| 0.002905135 | 0.013042851 |
| 0.002906361 | 0.013046072 |
| 0.002907347 | 0.013048212 |
| 0.002910346 | 0.013059388 |
| 0.002914244 | 0.013074593 |
| 0.00291793  | 0.013088838 |
| 0.002919214 | 0.013092309 |
| 0.002920729 | 0.013096814 |
| 0.002923928 | 0.013108867 |
| 0.002925668 | 0.013111964 |
| 0.002925727 | 0.013111964 |
| 0.002926152 | 0.013111964 |
| 0.00292931  | 0.013123822 |
| 0.002930373 | 0.013126288 |
| 0.00293159  | 0.013129448 |
| 0.002934758 | 0.01314134  |
| 0.002955814 | 0.013233316 |
| 0.002966887 | 0.013280575 |
| 0.002969012 | 0.013287768 |
| 0.002971264 | 0.013295524 |
| 0.002971947 | 0.013296263 |
| 0.002973009 | 0.013298694 |
| 0.002974981 | 0.013305193 |
| 0.002979662 | 0.013323807 |
| 0.00298292  | 0.01333516  |
| 0.002983241 | 0.01333516  |
| 0.002994294 | 0.013382234 |
| 0.002995828 | 0.013386725 |
| 0.002996342 | 0.013386725 |
| 0.002999069 | 0.013396575 |
| 0.00300174  | 0.013406169 |
| 0.00300256  | 0.013407498 |
| 0.003005832 | 0.01341977  |
| 0.003016519 | 0.013465141 |
| 0.003018415 | 0.013471258 |
| 0.003022613 | 0.013487647 |
| 0.003025226 | 0.01349696  |
| 0.003025942 | 0.013497808 |
| 0.003034389 | 0.013533133 |
| 0.003040016 | 0.013555869 |
| 0.003041065 | 0.01355819  |
| 0.003043579 | 0.013565753 |
| 0.003043819 | 0.013565753 |
| 0.003050652 | 0.013593843 |
| 0.003052348 | 0.013599039 |
| 0.003055558 | 0.013610978 |
| 0.003062841 | 0.013641051 |
| 0.003063418 | 0.013641252 |
| 0.003065922 | 0.013648452 |
| 0.003066099 | 0.013648452 |

## TAUvsControls

|             |             |
|-------------|-------------|
| 0.003071404 | 0.013669695 |
| 0.003076117 | 0.013688293 |
| 0.003082775 | 0.013715541 |
| 0.00308527  | 0.013724261 |
| 0.003086278 | 0.013725209 |
| 0.003086553 | 0.013725209 |
| 0.003089156 | 0.013734401 |
| 0.003090989 | 0.013740171 |
| 0.00309292  | 0.013746369 |
| 0.003093686 | 0.013747392 |
| 0.003094867 | 0.013750124 |
| 0.003095373 | 0.013750124 |
| 0.003098968 | 0.01376371  |
| 0.003101521 | 0.013772667 |
| 0.003111364 | 0.013813984 |
| 0.003111989 | 0.01381427  |
| 0.003112506 | 0.01381427  |
| 0.003122328 | 0.013853895 |
| 0.003122514 | 0.013853895 |
| 0.003124798 | 0.013861628 |
| 0.003132082 | 0.013891538 |
| 0.003134413 | 0.013899474 |
| 0.003136291 | 0.013905398 |
| 0.003140086 | 0.013919816 |
| 0.003140768 | 0.013920436 |
| 0.003147645 | 0.013948506 |
| 0.003150374 | 0.013957903 |
| 0.003150854 | 0.013957903 |
| 0.003152644 | 0.013963421 |
| 0.003157367 | 0.013981925 |
| 0.003158649 | 0.013985187 |
| 0.003159494 | 0.013986515 |
| 0.003163058 | 0.013999874 |
| 0.003175068 | 0.014050608 |
| 0.003176687 | 0.014055347 |
| 0.003182003 | 0.014072072 |
| 0.003182997 | 0.014072072 |
| 0.003183238 | 0.014072072 |
| 0.003183542 | 0.014072072 |
| 0.003183637 | 0.014072072 |
| 0.003183759 | 0.014072072 |
| 0.003193598 | 0.014113127 |
| 0.00319509  | 0.014117288 |
| 0.003203243 | 0.014150877 |
| 0.003204629 | 0.01415456  |
| 0.003213761 | 0.014192451 |
| 0.00321462  | 0.014193802 |
| 0.003217686 | 0.014204893 |
| 0.003220339 | 0.014214161 |
| 0.003224337 | 0.014229356 |
| 0.003225641 | 0.014232663 |

## TAUvsControls

|             |             |
|-------------|-------------|
| 0.003227343 | 0.014237721 |
| 0.003236341 | 0.014274962 |
| 0.00323941  | 0.014286044 |
| 0.003252105 | 0.014339562 |
| 0.003260666 | 0.014374842 |
| 0.00327295  | 0.014426517 |
| 0.003278418 | 0.014448133 |
| 0.003295421 | 0.014520573 |
| 0.003304221 | 0.014556848 |
| 0.003310614 | 0.014581    |
| 0.00331084  | 0.014581    |
| 0.003313227 | 0.014589006 |
| 0.003314942 | 0.014593539 |
| 0.003315394 | 0.014593539 |
| 0.00333669  | 0.014682667 |
| 0.003336788 | 0.014682667 |
| 0.003337707 | 0.014684193 |
| 0.003338312 | 0.014684338 |
| 0.003339017 | 0.014684919 |
| 0.003342129 | 0.014696086 |
| 0.00335757  | 0.014761453 |
| 0.003360186 | 0.01477042  |
| 0.00336263  | 0.014778632 |
| 0.003369008 | 0.014804128 |
| 0.003372715 | 0.014817877 |
| 0.003375534 | 0.014827722 |
| 0.00338041  | 0.014846597 |
| 0.003381669 | 0.014849586 |
| 0.003383795 | 0.014856378 |
| 0.003388637 | 0.014875089 |
| 0.003398596 | 0.014916255 |
| 0.003401477 | 0.014926344 |
| 0.00340816  | 0.014953114 |
| 0.003413213 | 0.014972719 |
| 0.003419092 | 0.014995944 |
| 0.003420951 | 0.014999736 |
| 0.003421126 | 0.014999736 |
| 0.00342358  | 0.015007931 |
| 0.003424964 | 0.015011431 |
| 0.003426451 | 0.015015386 |
| 0.003428807 | 0.01502314  |
| 0.003430191 | 0.015026637 |
| 0.003432891 | 0.0150359   |
| 0.003434026 | 0.015038301 |
| 0.003437536 | 0.015048533 |
| 0.003437536 | 0.015048533 |
| 0.003442971 | 0.015069754 |
| 0.003448377 | 0.015090842 |
| 0.003449652 | 0.015093844 |
| 0.003452871 | 0.015104233 |
| 0.003453204 | 0.015104233 |

## TAUvsControls

|             |             |
|-------------|-------------|
| 0.003461003 | 0.015135765 |
| 0.003463599 | 0.015144538 |
| 0.003466594 | 0.01515505  |
| 0.00347049  | 0.015169497 |
| 0.003475652 | 0.015189471 |
| 0.003482521 | 0.015215987 |
| 0.003482906 | 0.015215987 |
| 0.003487292 | 0.015232554 |
| 0.003492065 | 0.015250804 |
| 0.00350105  | 0.015287441 |
| 0.003509715 | 0.015319037 |
| 0.003509867 | 0.015319037 |
| 0.003510078 | 0.015319037 |
| 0.003513775 | 0.015332565 |
| 0.003514578 | 0.01533346  |
| 0.003523417 | 0.015369409 |
| 0.003525012 | 0.015373751 |
| 0.003528927 | 0.01538821  |
| 0.003530403 | 0.015392028 |
| 0.003536476 | 0.015415885 |
| 0.003546806 | 0.015458286 |
| 0.003549581 | 0.015467231 |
| 0.003550431 | 0.015467231 |
| 0.003550667 | 0.015467231 |
| 0.003552085 | 0.01547078  |
| 0.00355558  | 0.015483375 |
| 0.003556538 | 0.015484916 |
| 0.003557889 | 0.015488169 |
| 0.003559565 | 0.015492834 |
| 0.003563726 | 0.015508316 |
| 0.003564477 | 0.015508953 |
| 0.003570556 | 0.015532768 |
| 0.003572321 | 0.015537808 |
| 0.003581491 | 0.015575052 |
| 0.00358499  | 0.015587627 |
| 0.003588262 | 0.015597973 |
| 0.003588586 | 0.015597973 |
| 0.003599618 | 0.015642127 |
| 0.003599964 | 0.015642127 |
| 0.003600654 | 0.015642476 |
| 0.003601476 | 0.015642785 |
| 0.003601945 | 0.015642785 |
| 0.003604128 | 0.015649617 |
| 0.003607981 | 0.015663694 |
| 0.003632281 | 0.015766519 |
| 0.003640678 | 0.015800298 |
| 0.003653862 | 0.01585483  |
| 0.00366125  | 0.015884202 |
| 0.003672704 | 0.015931198 |
| 0.003681523 | 0.015966754 |
| 0.003683643 | 0.015973246 |

## TAUvsControls

|             |             |
|-------------|-------------|
| 0.003684541 | 0.015974442 |
| 0.00368633  | 0.015979498 |
| 0.003687775 | 0.01598306  |
| 0.003690378 | 0.015991637 |
| 0.003693291 | 0.016001558 |
| 0.003694875 | 0.016003796 |
| 0.00369524  | 0.016003796 |
| 0.00369568  | 0.016003796 |
| 0.003697647 | 0.016009612 |
| 0.00370026  | 0.016018223 |
| 0.00370718  | 0.016042956 |
| 0.003707267 | 0.016042956 |
| 0.00370785  | 0.016042956 |
| 0.003718542 | 0.016086504 |
| 0.003721785 | 0.016097816 |
| 0.003724165 | 0.016105395 |
| 0.003727324 | 0.016116343 |
| 0.003738352 | 0.0161613   |
| 0.003746788 | 0.016195038 |
| 0.003757372 | 0.016238051 |
| 0.003758317 | 0.016239399 |
| 0.003765764 | 0.016268834 |
| 0.003769616 | 0.016282735 |
| 0.003784656 | 0.016344948 |
| 0.003786914 | 0.016351947 |
| 0.003793911 | 0.016379401 |
| 0.003794701 | 0.016380054 |
| 0.003795769 | 0.016381906 |
| 0.003797363 | 0.016386032 |
| 0.003806353 | 0.016422058 |
| 0.003809227 | 0.016431695 |
| 0.003810042 | 0.016432446 |
| 0.003825897 | 0.016498053 |
| 0.003832003 | 0.016521608 |
| 0.003833129 | 0.016523686 |
| 0.003834778 | 0.016528016 |
| 0.00383595  | 0.016530291 |
| 0.003839017 | 0.016540726 |
| 0.003845553 | 0.016566104 |
| 0.003851001 | 0.016586788 |
| 0.00385671  | 0.016608591 |
| 0.00386269  | 0.016630273 |
| 0.003863042 | 0.016630273 |
| 0.003874039 | 0.016674814 |
| 0.003880772 | 0.016700995 |
| 0.00388668  | 0.016723611 |
| 0.003887507 | 0.016724367 |
| 0.00389028  | 0.016733488 |
| 0.003895667 | 0.016753852 |
| 0.003898108 | 0.016761538 |
| 0.003900426 | 0.016768692 |

## TAUvsControls

|             |             |
|-------------|-------------|
| 0.003903371 | 0.016778544 |
| 0.003907106 | 0.016791782 |
| 0.003913603 | 0.016816887 |
| 0.003915724 | 0.016823184 |
| 0.00391986  | 0.016835896 |
| 0.003919996 | 0.016835896 |
| 0.003925112 | 0.016855047 |
| 0.003927241 | 0.016861365 |
| 0.003933933 | 0.016886941 |
| 0.003934514 | 0.016886941 |
| 0.003936653 | 0.016893293 |
| 0.003939399 | 0.016902249 |
| 0.003943315 | 0.016915888 |
| 0.003943897 | 0.016915888 |
| 0.003947059 | 0.016926619 |
| 0.003949573 | 0.01693457  |
| 0.003951348 | 0.016938208 |
| 0.003951742 | 0.016938208 |
| 0.003958079 | 0.016962532 |
| 0.003971728 | 0.017018183 |
| 0.003976724 | 0.017036747 |
| 0.003983526 | 0.017063038 |
| 0.003989453 | 0.017084503 |
| 0.00398987  | 0.017084503 |
| 0.003994911 | 0.017099191 |
| 0.003995167 | 0.017099191 |
| 0.0039953   | 0.017099191 |
| 0.00400271  | 0.017127862 |
| 0.004003335 | 0.017127862 |
| 0.004011355 | 0.017159315 |
| 0.004017095 | 0.017181    |
| 0.004019031 | 0.017186416 |
| 0.004029696 | 0.017229152 |
| 0.004031367 | 0.017229836 |
| 0.004031691 | 0.017229836 |
| 0.004031872 | 0.017229836 |
| 0.004040497 | 0.017263817 |
| 0.004049995 | 0.017301519 |
| 0.004051345 | 0.017304404 |
| 0.004056917 | 0.017322676 |
| 0.004056974 | 0.017322676 |
| 0.004059874 | 0.017332173 |
| 0.004061958 | 0.017338188 |
| 0.004074696 | 0.017389663 |
| 0.004077537 | 0.017398893 |
| 0.004080623 | 0.017409164 |
| 0.004082858 | 0.017415805 |
| 0.004088804 | 0.017438267 |
| 0.004091342 | 0.017445429 |
| 0.004091844 | 0.017445429 |
| 0.004093058 | 0.017447706 |

## TAUvsControls

|             |             |
|-------------|-------------|
| 0.00409821  | 0.017466763 |
| 0.004109342 | 0.017511301 |
| 0.004115627 | 0.017535171 |
| 0.004118086 | 0.01754273  |
| 0.004120257 | 0.017549065 |
| 0.004122707 | 0.017555426 |
| 0.004123635 | 0.017555426 |
| 0.004123904 | 0.017555426 |
| 0.004124488 | 0.017555426 |
| 0.004132293 | 0.017585729 |
| 0.004137065 | 0.017603115 |
| 0.004138108 | 0.017604632 |
| 0.004145821 | 0.017634522 |
| 0.004147691 | 0.017639551 |
| 0.00415495  | 0.017667491 |
| 0.004158706 | 0.017680533 |
| 0.004159878 | 0.017682584 |
| 0.004161674 | 0.017687287 |
| 0.004163851 | 0.017693606 |
| 0.004172165 | 0.017726001 |
| 0.004175744 | 0.017738268 |
| 0.004187326 | 0.017784523 |
| 0.004193809 | 0.017809109 |
| 0.004194649 | 0.017809724 |
| 0.004198558 | 0.017823374 |
| 0.004199712 | 0.017825323 |
| 0.004201571 | 0.017830262 |
| 0.004212093 | 0.017871955 |
| 0.004214694 | 0.017880036 |
| 0.004222631 | 0.017910742 |
| 0.004230259 | 0.01794013  |
| 0.004237921 | 0.017969653 |
| 0.004239491 | 0.017973338 |
| 0.004241082 | 0.017977113 |
| 0.004243506 | 0.017984416 |
| 0.004244581 | 0.017986    |
| 0.004257497 | 0.018037751 |
| 0.004258841 | 0.018040464 |
| 0.004263424 | 0.018056515 |
| 0.004264038 | 0.018056515 |
| 0.004270845 | 0.018082355 |
| 0.004272145 | 0.018084872 |
| 0.004273966 | 0.018089594 |
| 0.004277924 | 0.018103361 |
| 0.004280153 | 0.018109805 |
| 0.004300539 | 0.018193059 |
| 0.004313996 | 0.01824698  |
| 0.004320733 | 0.018272461 |
| 0.00432621  | 0.018290244 |
| 0.004326364 | 0.018290244 |
| 0.004328441 | 0.018296009 |

## TAUvsControls

|             |             |
|-------------|-------------|
| 0.00433091  | 0.018303429 |
| 0.004341476 | 0.018345062 |
| 0.004356064 | 0.018403669 |
| 0.004364825 | 0.018437648 |
| 0.004369029 | 0.018452368 |
| 0.004375308 | 0.018475845 |
| 0.004379575 | 0.01849015  |
| 0.004380138 | 0.01849015  |
| 0.004388409 | 0.018522016 |
| 0.004395788 | 0.018550108 |
| 0.004398888 | 0.018560138 |
| 0.004403917 | 0.0185783   |
| 0.004411813 | 0.018608548 |
| 0.004420778 | 0.018643299 |
| 0.004425609 | 0.018660603 |
| 0.004441256 | 0.018723502 |
| 0.004443596 | 0.018730287 |
| 0.004444996 | 0.01873311  |
| 0.00446022  | 0.018794181 |
| 0.004461943 | 0.018798353 |
| 0.004464001 | 0.018803935 |
| 0.004474876 | 0.018846649 |
| 0.004478206 | 0.018857576 |
| 0.00447936  | 0.01885934  |
| 0.004480864 | 0.018859652 |
| 0.004480905 | 0.018859652 |
| 0.0044834   | 0.01886706  |
| 0.004485139 | 0.018871281 |
| 0.004487839 | 0.018876935 |
| 0.004487955 | 0.018876935 |
| 0.004491654 | 0.018888138 |
| 0.004492323 | 0.018888138 |
| 0.004492827 | 0.018888138 |
| 0.004497839 | 0.018906109 |
| 0.004512414 | 0.018964266 |
| 0.004514214 | 0.018968722 |
| 0.004517185 | 0.018978097 |
| 0.004526598 | 0.019014527 |
| 0.004533101 | 0.019038729 |
| 0.004535996 | 0.019047769 |
| 0.00453899  | 0.019057221 |
| 0.004544214 | 0.019076029 |
| 0.004545433 | 0.019078026 |
| 0.004562697 | 0.019147351 |
| 0.004568107 | 0.01916692  |
| 0.004572697 | 0.019180085 |
| 0.00457274  | 0.019180085 |
| 0.004577191 | 0.019195615 |
| 0.004580572 | 0.019206654 |
| 0.004582854 | 0.019212542 |
| 0.004583475 | 0.019212542 |



## TAUvsControls

|             |             |
|-------------|-------------|
| 0.004586503 | 0.019222093 |
| 0.004592898 | 0.01924575  |
| 0.004598874 | 0.019267644 |
| 0.004601038 | 0.019273562 |
| 0.004604691 | 0.019285715 |
| 0.004610193 | 0.019305606 |
| 0.004612658 | 0.019312775 |
| 0.004616377 | 0.019325192 |
| 0.004619243 | 0.019334036 |
| 0.004621247 | 0.019339264 |
| 0.004624217 | 0.019348537 |
| 0.004627177 | 0.019357767 |
| 0.004628292 | 0.019359273 |
| 0.004629957 | 0.019363081 |
| 0.004631822 | 0.019367721 |
| 0.004632692 | 0.019368203 |
| 0.004634009 | 0.019370551 |
| 0.004637255 | 0.019380959 |
| 0.004640305 | 0.019390549 |
| 0.004645236 | 0.019406435 |
| 0.00464562  | 0.019406435 |
| 0.004653368 | 0.019434914 |
| 0.004653953 | 0.019434914 |
| 0.00465899  | 0.019452782 |
| 0.00466111  | 0.019458467 |
| 0.004667907 | 0.019476558 |
| 0.004668268 | 0.019476558 |
| 0.004668646 | 0.019476558 |
| 0.004669086 | 0.019476558 |
| 0.004669241 | 0.019476558 |
| 0.00467294  | 0.019488819 |
| 0.004678949 | 0.019510709 |
| 0.004684461 | 0.019530516 |
| 0.004689417 | 0.019548    |
| 0.004695909 | 0.019568879 |
| 0.004695951 | 0.019568879 |
| 0.004701541 | 0.019588991 |
| 0.004704853 | 0.019599608 |
| 0.00470853  | 0.019609565 |
| 0.004708773 | 0.019609565 |
| 0.004709631 | 0.019609954 |
| 0.004712557 | 0.019618954 |
| 0.004715899 | 0.019628194 |
| 0.004716307 | 0.019628194 |
| 0.00472015  | 0.019641002 |
| 0.004722179 | 0.019646255 |
| 0.004725689 | 0.019657672 |
| 0.004726546 | 0.019658046 |
| 0.00473745  | 0.019700206 |
| 0.004742663 | 0.019718686 |
| 0.004746865 | 0.019732957 |

## TAUvsControls

|             |             |
|-------------|-------------|
| 0.004748957 | 0.019738452 |
| 0.004755641 | 0.019763034 |
| 0.004766355 | 0.019804348 |
| 0.004776087 | 0.01984157  |
| 0.004782651 | 0.019863396 |
| 0.00478289  | 0.019863396 |
| 0.004784931 | 0.019865673 |
| 0.004784987 | 0.019865673 |
| 0.004789632 | 0.019881742 |
| 0.004794432 | 0.019898445 |
| 0.004797135 | 0.019906441 |
| 0.004800628 | 0.019917713 |
| 0.004808767 | 0.019948257 |
| 0.004823403 | 0.020004483 |
| 0.004823881 | 0.020004483 |
| 0.004831068 | 0.020031049 |
| 0.004834524 | 0.020042138 |
| 0.004841242 | 0.020064435 |
| 0.004841467 | 0.020064435 |
| 0.004851108 | 0.02010114  |
| 0.004853163 | 0.02010641  |
| 0.004855769 | 0.020113957 |
| 0.004866479 | 0.020155065 |
| 0.004873659 | 0.020181545 |
| 0.004881136 | 0.020209244 |
| 0.004892629 | 0.020253559 |
| 0.004897225 | 0.020269311 |
| 0.004899741 | 0.020276452 |
| 0.004904302 | 0.020289013 |
| 0.004904358 | 0.020289013 |
| 0.004908405 | 0.020302478 |
| 0.004915617 | 0.020329033 |
| 0.004919969 | 0.020343751 |
| 0.004939917 | 0.020422941 |
| 0.00494238  | 0.02042983  |
| 0.004952969 | 0.020469888 |
| 0.004953667 | 0.020469888 |
| 0.004955565 | 0.020473167 |
| 0.004956057 | 0.020473167 |
| 0.00496131  | 0.020491569 |
| 0.004967153 | 0.020512397 |
| 0.004977209 | 0.020550618 |
| 0.004982075 | 0.0205674   |
| 0.004988057 | 0.02058878  |
| 0.005002658 | 0.020645725 |
| 0.005008675 | 0.020666728 |
| 0.005009359 | 0.020666728 |
| 0.005013428 | 0.020680189 |
| 0.005014419 | 0.020680953 |
| 0.005016795 | 0.020687424 |
| 0.005028149 | 0.020729696 |

## TAUvsControls

|             |             |
|-------------|-------------|
| 0.005028663 | 0.020729696 |
| 0.00503271  | 0.020743046 |
| 0.005040179 | 0.020767285 |
| 0.00504021  | 0.020767285 |
| 0.005042858 | 0.020774859 |
| 0.005055685 | 0.020824358 |
| 0.005061762 | 0.020846041 |
| 0.005063694 | 0.020850649 |
| 0.005066724 | 0.020859775 |
| 0.005073711 | 0.020885188 |
| 0.005089456 | 0.020946641 |
| 0.005100768 | 0.02098983  |
| 0.005109045 | 0.021020516 |
| 0.005111571 | 0.021027535 |
| 0.005118518 | 0.021052738 |
| 0.005119976 | 0.021055356 |
| 0.005136212 | 0.021118739 |
| 0.005139242 | 0.021127812 |
| 0.005141774 | 0.021133679 |
| 0.005142317 | 0.021133679 |
| 0.005148313 | 0.021154931 |
| 0.005155819 | 0.021182381 |
| 0.005157866 | 0.021186018 |
| 0.005158356 | 0.021186018 |
| 0.005160723 | 0.0211923   |
| 0.005161538 | 0.0211923   |
| 0.005189667 | 0.02130438  |
| 0.005191546 | 0.021308682 |
| 0.005192519 | 0.021309266 |
| 0.005206091 | 0.021361549 |
| 0.005208766 | 0.021369105 |
| 0.005219571 | 0.021410006 |
| 0.005223843 | 0.021424103 |
| 0.005228666 | 0.021440456 |
| 0.005230994 | 0.021446574 |
| 0.005239291 | 0.021477158 |
| 0.005240617 | 0.021479161 |
| 0.005241542 | 0.021479521 |
| 0.005247451 | 0.0215003   |
| 0.005249006 | 0.021501736 |
| 0.005249478 | 0.021501736 |
| 0.005254537 | 0.021517552 |
| 0.005255018 | 0.021517552 |
| 0.005262799 | 0.021545975 |
| 0.005265671 | 0.021554293 |
| 0.005268897 | 0.021564055 |
| 0.005273223 | 0.021572004 |
| 0.00527406  | 0.021572004 |
| 0.005274145 | 0.021572004 |
| 0.005274203 | 0.021572004 |
| 0.005275831 | 0.021575223 |

## TAUvsControls

|             |             |
|-------------|-------------|
| 0.005292932 | 0.021641704 |
| 0.005295536 | 0.021645868 |
| 0.005295638 | 0.021645868 |
| 0.005296888 | 0.021647495 |
| 0.005302596 | 0.021667402 |
| 0.005307405 | 0.021683596 |
| 0.005309553 | 0.021688753 |
| 0.005310358 | 0.021688753 |
| 0.005319846 | 0.021724044 |
| 0.005325795 | 0.021744876 |
| 0.005335742 | 0.021782022 |
| 0.005347664 | 0.021827218 |
| 0.005374547 | 0.021932393 |
| 0.005375142 | 0.021932393 |
| 0.005382323 | 0.021958199 |
| 0.00539057  | 0.021988346 |
| 0.005413625 | 0.022078877 |
| 0.005416176 | 0.022085772 |
| 0.005422815 | 0.022109328 |
| 0.005429792 | 0.022134253 |
| 0.005431414 | 0.022137349 |
| 0.005439537 | 0.022166935 |
| 0.005443041 | 0.02217769  |
| 0.005447478 | 0.022192245 |
| 0.00545053  | 0.02219947  |
| 0.005450983 | 0.02219947  |
| 0.005453753 | 0.022207227 |
| 0.005455862 | 0.022212285 |
| 0.00546887  | 0.022259374 |
| 0.005469163 | 0.022259374 |
| 0.005470897 | 0.022262898 |
| 0.005479321 | 0.022293639 |
| 0.005494233 | 0.022350765 |
| 0.005496577 | 0.022356757 |
| 0.005501435 | 0.022371521 |
| 0.005501951 | 0.022371521 |
| 0.005507687 | 0.022391292 |
| 0.005512802 | 0.022408537 |
| 0.005513713 | 0.022408686 |
| 0.005541498 | 0.022518042 |
| 0.005542886 | 0.022519075 |
| 0.005543508 | 0.022519075 |
| 0.005552464 | 0.022551885 |
| 0.005555878 | 0.022562179 |
| 0.005557514 | 0.02256525  |
| 0.005571102 | 0.022616841 |
| 0.005578128 | 0.022641781 |
| 0.005582136 | 0.022651929 |
| 0.005582395 | 0.022651929 |
| 0.00558943  | 0.022676887 |
| 0.005595559 | 0.022698164 |

## TAUvsControls

|             |             |
|-------------|-------------|
| 0.005596762 | 0.022699454 |
| 0.005605729 | 0.022732228 |
| 0.005607629 | 0.022736338 |
| 0.005611306 | 0.022747652 |
| 0.005614365 | 0.022756454 |
| 0.005624324 | 0.022793221 |
| 0.005626128 | 0.022796929 |
| 0.005662101 | 0.022939066 |
| 0.005663399 | 0.0229407   |
| 0.005675877 | 0.022983873 |
| 0.005676187 | 0.022983873 |
| 0.005676745 | 0.022983873 |
| 0.005690434 | 0.023035659 |
| 0.005700106 | 0.023071173 |
| 0.005701046 | 0.023071338 |
| 0.005719716 | 0.023143241 |
| 0.005738484 | 0.023215516 |
| 0.005740874 | 0.023221523 |
| 0.005750761 | 0.023257849 |
| 0.005762876 | 0.023303172 |
| 0.005768462 | 0.023322079 |
| 0.005772525 | 0.023333379 |
| 0.005773595 | 0.023333379 |
| 0.005774529 | 0.023333379 |
| 0.005774895 | 0.023333379 |
| 0.005786056 | 0.023374792 |
| 0.00579051  | 0.0233891   |
| 0.005801287 | 0.023427176 |
| 0.005801763 | 0.023427176 |
| 0.005806569 | 0.023442893 |
| 0.00580805  | 0.023445181 |
| 0.005812871 | 0.023460948 |
| 0.00581816  | 0.0234786   |
| 0.005831297 | 0.023527912 |
| 0.005834612 | 0.023537587 |
| 0.005841107 | 0.023557716 |
| 0.005841439 | 0.023557716 |
| 0.005842614 | 0.023558161 |
| 0.005843386 | 0.023558161 |
| 0.005848217 | 0.023573928 |
| 0.005881352 | 0.023702207 |
| 0.005881888 | 0.023702207 |
| 0.005893116 | 0.02374372  |
| 0.005897116 | 0.023756106 |
| 0.005901822 | 0.02376812  |
| 0.005901952 | 0.02376812  |
| 0.005904098 | 0.023773032 |
| 0.005907373 | 0.023782487 |
| 0.005912373 | 0.02379888  |
| 0.005915013 | 0.02380577  |
| 0.005922881 | 0.023833694 |

## TAUvsControls

|             |             |
|-------------|-------------|
| 0.005925884 | 0.023842038 |
| 0.005927879 | 0.023846323 |
| 0.005938794 | 0.023886486 |
| 0.0059482   | 0.023920569 |
| 0.005975909 | 0.02402823  |
| 0.005980619 | 0.024043399 |
| 0.005991127 | 0.024081871 |
| 0.006008187 | 0.024146662 |
| 0.006013894 | 0.024164402 |
| 0.006014747 | 0.024164402 |
| 0.006015428 | 0.024164402 |
| 0.006017323 | 0.024166655 |
| 0.006017873 | 0.024166655 |
| 0.00602092  | 0.02417298  |
| 0.006021333 | 0.02417298  |
| 0.00602283  | 0.024175205 |
| 0.006026863 | 0.024187611 |
| 0.00604188  | 0.024244084 |
| 0.006045009 | 0.024252846 |
| 0.006050379 | 0.024270593 |
| 0.006058075 | 0.024297664 |
| 0.006059775 | 0.024300685 |
| 0.006070465 | 0.024339746 |
| 0.006075328 | 0.024355439 |
| 0.006088702 | 0.024402864 |
| 0.006089061 | 0.024402864 |
| 0.006091258 | 0.024407853 |
| 0.006102823 | 0.024447958 |
| 0.006103173 | 0.024447958 |
| 0.006115428 | 0.024493225 |
| 0.006120845 | 0.024511095 |
| 0.006124745 | 0.024522883 |
| 0.006132168 | 0.024548772 |
| 0.0061493   | 0.024613515 |
| 0.006152806 | 0.024623705 |
| 0.006159953 | 0.024648461 |
| 0.00617084  | 0.024688174 |
| 0.00617294  | 0.024690229 |
| 0.006173279 | 0.024690229 |
| 0.006191549 | 0.024759439 |
| 0.006203015 | 0.024801424 |
| 0.006205534 | 0.024803864 |
| 0.006205559 | 0.024803864 |
| 0.006213695 | 0.024827765 |
| 0.006214315 | 0.024827765 |
| 0.006214443 | 0.024827765 |
| 0.006218316 | 0.024836789 |
| 0.006218638 | 0.024836789 |
| 0.006220931 | 0.024842077 |
| 0.006234269 | 0.024891465 |
| 0.006244359 | 0.024927868 |

## TAUvsControls

|             |             |
|-------------|-------------|
| 0.006245741 | 0.024929507 |
| 0.006256726 | 0.024969468 |
| 0.006261334 | 0.024983969 |
| 0.00626836  | 0.025004616 |
| 0.006268458 | 0.025004616 |
| 0.006271234 | 0.025010624 |
| 0.006271914 | 0.025010624 |
| 0.00627578  | 0.025022149 |
| 0.006277636 | 0.025025659 |
| 0.006280311 | 0.025032432 |
| 0.00628537  | 0.025048702 |
| 0.00630071  | 0.025105935 |
| 0.006302628 | 0.025109676 |
| 0.006309011 | 0.025131203 |
| 0.006321739 | 0.025177995 |
| 0.006331538 | 0.025210501 |
| 0.006331867 | 0.025210501 |
| 0.006338214 | 0.025231856 |
| 0.006346437 | 0.025260672 |
| 0.006362151 | 0.02531929  |
| 0.006372624 | 0.025356401 |
| 0.006373454 | 0.025356401 |
| 0.006380494 | 0.025380475 |
| 0.006383759 | 0.025389525 |
| 0.006394289 | 0.02542746  |
| 0.006398261 | 0.02543931  |
| 0.006417327 | 0.025511161 |
| 0.006423079 | 0.025527514 |
| 0.006423431 | 0.025527514 |
| 0.006444509 | 0.025607315 |
| 0.006449977 | 0.025625071 |
| 0.006456245 | 0.025646002 |
| 0.006465801 | 0.025679981 |
| 0.006499077 | 0.025808149 |
| 0.006505072 | 0.025827956 |
| 0.00652715  | 0.025911602 |
| 0.006530532 | 0.025921017 |
| 0.006532369 | 0.025924296 |
| 0.006534919 | 0.025930403 |
| 0.006539424 | 0.025944268 |
| 0.006544705 | 0.025961204 |
| 0.006550023 | 0.025977632 |
| 0.006551174 | 0.025977632 |
| 0.006551885 | 0.025977632 |
| 0.006555614 | 0.0259884   |
| 0.006563017 | 0.026011216 |
| 0.006563398 | 0.026011216 |
| 0.006566223 | 0.026018393 |
| 0.006571442 | 0.026035051 |
| 0.006596719 | 0.026131156 |
| 0.006607586 | 0.026169003 |

## TAUvsControls

|             |             |
|-------------|-------------|
| 0.006608314 | 0.026169003 |
| 0.006609614 | 0.026170114 |
| 0.006611566 | 0.026173801 |
| 0.006612674 | 0.026174147 |
| 0.006614506 | 0.026177358 |
| 0.006618496 | 0.026188861 |
| 0.006619454 | 0.026188861 |
| 0.006621745 | 0.026193882 |
| 0.006627014 | 0.026210685 |
| 0.006632052 | 0.026226565 |
| 0.006634223 | 0.026231108 |
| 0.006640448 | 0.026251672 |
| 0.006647896 | 0.026277066 |
| 0.006654815 | 0.026300361 |
| 0.006659783 | 0.026315942 |
| 0.006670969 | 0.026356081 |
| 0.006679204 | 0.026384554 |
| 0.006707338 | 0.026491456 |
| 0.006708383 | 0.026491456 |
| 0.006709365 | 0.026491456 |
| 0.006724254 | 0.026544645 |
| 0.006724906 | 0.026544645 |
| 0.006735511 | 0.026582416 |
| 0.006736735 | 0.026583155 |
| 0.006740881 | 0.026595426 |
| 0.006744129 | 0.026604149 |
| 0.006748292 | 0.026616475 |
| 0.00675097  | 0.026622943 |
| 0.006763826 | 0.026669543 |
| 0.00677028  | 0.026690887 |
| 0.006771906 | 0.026693194 |
| 0.006776794 | 0.026708359 |
| 0.006784118 | 0.026733114 |
| 0.006787689 | 0.026743079 |
| 0.006800671 | 0.026790111 |
| 0.006810638 | 0.026825255 |
| 0.006813472 | 0.026832294 |
| 0.006817142 | 0.026842628 |
| 0.006827512 | 0.026879334 |
| 0.006833574 | 0.026899068 |
| 0.006835613 | 0.026902966 |
| 0.006850565 | 0.026957676 |
| 0.006855192 | 0.026971746 |
| 0.00685908  | 0.026982906 |
| 0.006868694 | 0.027016582 |
| 0.006872065 | 0.027025696 |
| 0.006878865 | 0.027048291 |
| 0.006882436 | 0.027058184 |
| 0.006892314 | 0.027092869 |
| 0.006895348 | 0.027098083 |
| 0.006895754 | 0.027098083 |



## TAUvsControls

|             |             |
|-------------|-------------|
| 0.006902425 | 0.027120145 |
| 0.006905063 | 0.027126352 |
| 0.006906195 | 0.027126646 |
| 0.006918329 | 0.027170147 |
| 0.006919973 | 0.027172443 |
| 0.006934248 | 0.027224327 |
| 0.006946486 | 0.0272682   |
| 0.006950478 | 0.027279696 |
| 0.006960875 | 0.027316324 |
| 0.006968543 | 0.027342229 |
| 0.006981809 | 0.027390093 |
| 0.006982953 | 0.027390391 |
| 0.00699284  | 0.027424978 |
| 0.00700572  | 0.027471289 |
| 0.007011757 | 0.027490762 |
| 0.007015435 | 0.027497042 |
| 0.007015503 | 0.027497042 |
| 0.007033565 | 0.027563622 |
| 0.007036556 | 0.027570544 |
| 0.007037481 | 0.027570544 |
| 0.007060787 | 0.027657623 |
| 0.007068903 | 0.027685186 |
| 0.007072885 | 0.027696555 |
| 0.007086773 | 0.027746702 |
| 0.007089498 | 0.027753134 |
| 0.007099984 | 0.027789944 |
| 0.007103046 | 0.027797683 |
| 0.007109294 | 0.027817892 |
| 0.007119567 | 0.027853839 |
| 0.007136045 | 0.027910468 |
| 0.007138002 | 0.027910468 |
| 0.007138185 | 0.027910468 |
| 0.007138394 | 0.027910468 |
| 0.007156118 | 0.027975501 |
| 0.00718277  | 0.028075413 |
| 0.007184104 | 0.02807635  |
| 0.007201346 | 0.028139445 |
| 0.007217533 | 0.028194709 |
| 0.007217687 | 0.028194709 |
| 0.007227999 | 0.028230691 |
| 0.007233535 | 0.028248011 |
| 0.007236679 | 0.028253004 |
| 0.007237017 | 0.028253004 |
| 0.007238159 | 0.028253165 |
| 0.007247456 | 0.02828515  |
| 0.007250206 | 0.028291578 |
| 0.007253053 | 0.02829838  |
| 0.007281289 | 0.028404226 |
| 0.00728371  | 0.028409347 |
| 0.00728759  | 0.028420162 |
| 0.007295168 | 0.02844539  |

## TAUvsControls

|             |             |
|-------------|-------------|
| 0.007304486 | 0.028477392 |
| 0.007306504 | 0.028480932 |
| 0.007312591 | 0.028500327 |
| 0.007320194 | 0.028525626 |
| 0.00732986  | 0.028556656 |
| 0.007330384 | 0.028556656 |
| 0.007338186 | 0.028582708 |
| 0.007349446 | 0.02862222  |
| 0.007375633 | 0.028717088 |
| 0.007376884 | 0.028717088 |
| 0.007377165 | 0.028717088 |
| 0.00738741  | 0.028752609 |
| 0.007406913 | 0.028824141 |
| 0.007408505 | 0.028825962 |
| 0.007416364 | 0.028852166 |
| 0.007427017 | 0.028889228 |
| 0.007435825 | 0.028919103 |
| 0.007441488 | 0.028936738 |
| 0.007450656 | 0.028967995 |
| 0.00747373  | 0.029053306 |
| 0.00748706  | 0.029100714 |
| 0.007495533 | 0.029128773 |
| 0.007496551 | 0.029128773 |
| 0.007501235 | 0.029142561 |
| 0.007514698 | 0.029190443 |
| 0.00751717  | 0.029195625 |
| 0.007528849 | 0.029236556 |
| 0.007558913 | 0.02934886  |
| 0.007581416 | 0.029431777 |
| 0.007585214 | 0.029442062 |
| 0.007596462 | 0.029476807 |
| 0.007596464 | 0.029476807 |
| 0.007602968 | 0.029497584 |
| 0.007606197 | 0.029502233 |
| 0.007606467 | 0.029502233 |
| 0.007608702 | 0.02950644  |
| 0.007628588 | 0.029579084 |
| 0.007633779 | 0.029594739 |
| 0.007646384 | 0.029639127 |
| 0.007672055 | 0.02973414  |
| 0.007684305 | 0.029777117 |
| 0.007686905 | 0.029782695 |
| 0.007692356 | 0.029799311 |
| 0.007696302 | 0.029806038 |
| 0.007696417 | 0.029806038 |
| 0.00772299  | 0.029904435 |
| 0.007758392 | 0.030036981 |
| 0.007766902 | 0.030065389 |
| 0.007771635 | 0.030079173 |
| 0.007781457 | 0.03011264  |
| 0.007789519 | 0.030139291 |

## TAUvsControls

|             |             |
|-------------|-------------|
| 0.007796985 | 0.030161066 |
| 0.007797498 | 0.030161066 |
| 0.007822037 | 0.030251421 |
| 0.007835946 | 0.030300645 |
| 0.007847611 | 0.030341179 |
| 0.007856786 | 0.030372073 |
| 0.00789876  | 0.030529733 |
| 0.007917404 | 0.030597181 |
| 0.007919787 | 0.03060178  |
| 0.007924415 | 0.030615052 |
| 0.007925896 | 0.030616161 |
| 0.0079365   | 0.030652505 |
| 0.007953021 | 0.030709564 |
| 0.007954248 | 0.030709564 |
| 0.007954865 | 0.030709564 |
| 0.007957541 | 0.030714607 |
| 0.007958567 | 0.030714607 |
| 0.007973465 | 0.030763173 |
| 0.00797355  | 0.030763173 |
| 0.007993369 | 0.030835    |
| 0.008009075 | 0.030890942 |
| 0.00801619  | 0.030913734 |
| 0.008018923 | 0.030919628 |
| 0.008051583 | 0.031040412 |
| 0.008052994 | 0.031040412 |
| 0.00805411  | 0.031040412 |
| 0.008055852 | 0.031040412 |
| 0.008056299 | 0.031040412 |
| 0.008062609 | 0.031056706 |
| 0.008063425 | 0.031056706 |
| 0.008064161 | 0.031056706 |
| 0.008081195 | 0.031112694 |
| 0.00808223  | 0.031112694 |
| 0.008082338 | 0.031112694 |
| 0.008086965 | 0.031125835 |
| 0.008088949 | 0.031128799 |
| 0.008094244 | 0.031144502 |
| 0.008098549 | 0.031156394 |
| 0.00810576  | 0.031179459 |
| 0.008120016 | 0.031229615 |
| 0.008122162 | 0.031233182 |
| 0.00812923  | 0.031255677 |
| 0.008134078 | 0.03126963  |
| 0.008136902 | 0.031275799 |
| 0.008152362 | 0.031330528 |
| 0.008158294 | 0.031345502 |
| 0.008158703 | 0.031345502 |
| 0.008161845 | 0.031352876 |
| 0.008168117 | 0.031368443 |
| 0.008168343 | 0.031368443 |
| 0.008185725 | 0.031430488 |

## TAUvsControls

|             |             |
|-------------|-------------|
| 0.008193589 | 0.031455976 |
| 0.008203267 | 0.031488416 |
| 0.008206934 | 0.031497779 |
| 0.008220454 | 0.031544946 |
| 0.008228074 | 0.031569466 |
| 0.008240379 | 0.031611949 |
| 0.008261804 | 0.031689401 |
| 0.008280393 | 0.031751449 |
| 0.008280457 | 0.031751449 |
| 0.0082852   | 0.031764887 |
| 0.008288038 | 0.031771021 |
| 0.008295776 | 0.03179593  |
| 0.008306006 | 0.031830381 |
| 0.00830916  | 0.031837712 |
| 0.00831385  | 0.031850925 |
| 0.008324147 | 0.031885046 |
| 0.008325243 | 0.031885046 |
| 0.008352519 | 0.031984735 |
| 0.00835884  | 0.032004163 |
| 0.008383254 | 0.032092848 |
| 0.008388986 | 0.032110001 |
| 0.008402798 | 0.032158067 |
| 0.008405995 | 0.032163882 |
| 0.008406825 | 0.032163882 |
| 0.008418967 | 0.032205531 |
| 0.00843538  | 0.032263504 |
| 0.00844029  | 0.032277472 |
| 0.008454389 | 0.03232657  |
| 0.008464248 | 0.032359444 |
| 0.008469084 | 0.032369158 |
| 0.008469313 | 0.032369158 |
| 0.0084706   | 0.032369254 |
| 0.008472239 | 0.032370694 |
| 0.008475424 | 0.03237804  |
| 0.0084877   | 0.032420108 |
| 0.008493652 | 0.032438011 |
| 0.008496388 | 0.032443631 |
| 0.008511141 | 0.032495124 |
| 0.008516381 | 0.032510295 |
| 0.008520103 | 0.032519662 |
| 0.008523088 | 0.032526215 |
| 0.008531889 | 0.032554959 |
| 0.008533625 | 0.032556736 |
| 0.008560909 | 0.03265597  |
| 0.008577813 | 0.032715588 |
| 0.008586617 | 0.032744295 |
| 0.008596496 | 0.032777095 |
| 0.008600653 | 0.032788073 |
| 0.008604948 | 0.032799571 |
| 0.008612    | 0.032821573 |
| 0.008622339 | 0.032856094 |

## TAUvsControls

|             |             |
|-------------|-------------|
| 0.008640398 | 0.032920019 |
| 0.008643434 | 0.032926697 |
| 0.008645863 | 0.032931056 |
| 0.008647772 | 0.032933439 |
| 0.008664146 | 0.032990898 |
| 0.00867739  | 0.033036424 |
| 0.008708379 | 0.033146755 |
| 0.008708955 | 0.033146755 |
| 0.008716914 | 0.033172125 |
| 0.008726494 | 0.033203654 |
| 0.008734087 | 0.033227617 |
| 0.008756416 | 0.033307624 |
| 0.008759423 | 0.033313247 |
| 0.008760492 | 0.033313247 |
| 0.008770119 | 0.033344913 |
| 0.008775668 | 0.033361064 |
| 0.008790122 | 0.033411062 |
| 0.008791639 | 0.033411874 |
| 0.008793976 | 0.033415806 |
| 0.008801228 | 0.03343841  |
| 0.008817068 | 0.033493627 |
| 0.008823185 | 0.033509535 |
| 0.008823868 | 0.033509535 |
| 0.008826786 | 0.033515652 |
| 0.008832054 | 0.03352615  |
| 0.008832165 | 0.03352615  |
| 0.008838835 | 0.033545294 |
| 0.008839824 | 0.033545294 |
| 0.008851228 | 0.033583603 |
| 0.008857411 | 0.033599688 |
| 0.008858088 | 0.033599688 |
| 0.008866263 | 0.033625725 |
| 0.008869115 | 0.033629535 |
| 0.00886989  | 0.033629535 |
| 0.008890829 | 0.033703943 |
| 0.008893459 | 0.033708931 |
| 0.008904922 | 0.03374739  |
| 0.008912343 | 0.033770524 |
| 0.008930756 | 0.033835295 |
| 0.008938948 | 0.033861333 |
| 0.008944405 | 0.03387515  |
| 0.00894532  | 0.03387515  |
| 0.008946558 | 0.03387515  |
| 0.008969397 | 0.033956615 |
| 0.008983165 | 0.034003719 |
| 0.008990856 | 0.034027809 |
| 0.008995488 | 0.034040318 |
| 0.008999213 | 0.03404939  |
| 0.009032285 | 0.034169479 |
| 0.009037114 | 0.034182705 |
| 0.00904293  | 0.034199663 |

## TAUvsControls

|             |             |
|-------------|-------------|
| 0.009045137 | 0.034202965 |
| 0.009048372 | 0.034210155 |
| 0.009066735 | 0.034274531 |
| 0.009074221 | 0.034297773 |
| 0.009077657 | 0.034305704 |
| 0.009092754 | 0.034357696 |
| 0.009095237 | 0.034362017 |
| 0.009127071 | 0.034477207 |
| 0.009155086 | 0.034577943 |
| 0.009173021 | 0.034640579 |
| 0.009175654 | 0.034645422 |
| 0.009179805 | 0.034655995 |
| 0.009190297 | 0.034690496 |
| 0.00919491  | 0.034702804 |
| 0.009217672 | 0.03478359  |
| 0.00924986  | 0.03489992  |
| 0.009273172 | 0.034979519 |
| 0.009273684 | 0.034979519 |
| 0.009293456 | 0.035048941 |
| 0.009306948 | 0.035094665 |
| 0.009310795 | 0.035104012 |
| 0.009315381 | 0.035116139 |
| 0.009324198 | 0.035144212 |
| 0.009341422 | 0.035203958 |
| 0.009364392 | 0.035285337 |
| 0.009366883 | 0.035289538 |
| 0.009369012 | 0.035292377 |
| 0.009386087 | 0.035351504 |
| 0.009411602 | 0.035442399 |
| 0.009427025 | 0.035495269 |
| 0.009446055 | 0.035561701 |
| 0.009450669 | 0.03557385  |
| 0.009454288 | 0.035580568 |
| 0.009455228 | 0.035580568 |
| 0.009461065 | 0.03559731  |
| 0.009462552 | 0.035597683 |
| 0.009466011 | 0.035605471 |
| 0.009469738 | 0.03561427  |
| 0.009481831 | 0.03565452  |
| 0.009492626 | 0.035689879 |
| 0.009505523 | 0.035730948 |
| 0.009506335 | 0.035730948 |
| 0.009538653 | 0.035847166 |
| 0.009544954 | 0.03586559  |
| 0.009559928 | 0.035916594 |
| 0.009574901 | 0.03596758  |
| 0.00957942  | 0.035979284 |
| 0.009583967 | 0.035991093 |
| 0.00958559  | 0.03599192  |
| 0.009608523 | 0.036072747 |
| 0.009611232 | 0.036077637 |

## TAUvsControls

|             |             |
|-------------|-------------|
| 0.009621321 | 0.036110223 |
| 0.009623689 | 0.036113826 |
| 0.009626769 | 0.036120099 |
| 0.009655435 | 0.036222355 |
| 0.009658188 | 0.036227386 |
| 0.009670785 | 0.036269333 |
| 0.009683534 | 0.036311835 |
| 0.009692848 | 0.03634145  |
| 0.009699657 | 0.036361664 |
| 0.00973585  | 0.036492009 |
| 0.009749779 | 0.036538879 |
| 0.009751587 | 0.036540316 |
| 0.009755155 | 0.036547347 |
| 0.009756313 | 0.036547347 |
| 0.009773141 | 0.036605036 |
| 0.009792283 | 0.036671378 |
| 0.009800906 | 0.036698312 |
| 0.009818631 | 0.036759313 |
| 0.009822487 | 0.036768384 |
| 0.00982551  | 0.036774333 |
| 0.009835034 | 0.036804609 |
| 0.009840539 | 0.036819836 |
| 0.009854591 | 0.036867039 |
| 0.009858522 | 0.036874718 |
| 0.009859519 | 0.036874718 |
| 0.009862695 | 0.036881217 |
| 0.009868815 | 0.036898723 |
| 0.009872111 | 0.036905665 |
| 0.009887515 | 0.036957866 |
| 0.009894415 | 0.036978266 |
| 0.009903022 | 0.037005043 |
| 0.009907944 | 0.037018042 |
| 0.009910029 | 0.037020439 |
| 0.009912006 | 0.037022432 |
| 0.009927118 | 0.037072717 |
| 0.00992836  | 0.037072717 |
| 0.009931576 | 0.037079329 |
| 0.009935288 | 0.03708779  |
| 0.009938939 | 0.037091494 |
| 0.009939364 | 0.037091494 |
| 0.009940619 | 0.037091494 |
| 0.009945704 | 0.037105071 |
| 0.009961949 | 0.037160271 |
| 0.009970084 | 0.037185209 |
| 0.009976013 | 0.037201046 |
| 0.009977231 | 0.037201046 |
| 0.009989227 | 0.037240362 |
| 0.009990721 | 0.037240516 |
| 0.009997702 | 0.037261126 |
| 0.010006835 | 0.037289745 |
| 0.010010216 | 0.037296926 |

## TAUvsControls

|             |             |
|-------------|-------------|
| 0.010014498 | 0.037307458 |
| 0.010017856 | 0.037313595 |
| 0.010019054 | 0.037313595 |
| 0.010022295 | 0.037320243 |
| 0.010026509 | 0.037330518 |
| 0.010029398 | 0.037332572 |
| 0.010029972 | 0.037332572 |
| 0.010043146 | 0.037376181 |
| 0.010046128 | 0.037381856 |
| 0.010049914 | 0.037390522 |
| 0.010062871 | 0.037433297 |
| 0.010074786 | 0.037472184 |
| 0.010084268 | 0.037502015 |
| 0.010089764 | 0.037517012 |
| 0.010097928 | 0.037541927 |
| 0.010100596 | 0.037546403 |
| 0.010104606 | 0.037555866 |
| 0.01011063  | 0.037572813 |
| 0.010119537 | 0.037600464 |
| 0.010126457 | 0.037620728 |
| 0.010159329 | 0.037737382 |
| 0.010175736 | 0.037792853 |
| 0.010179477 | 0.037801275 |
| 0.010200255 | 0.03787295  |
| 0.010203755 | 0.037880463 |
| 0.010256623 | 0.038071217 |
| 0.01028768  | 0.038180971 |
| 0.010312815 | 0.038267739 |
| 0.010314043 | 0.038267739 |
| 0.01033848  | 0.038347607 |
| 0.010338559 | 0.038347607 |
| 0.01034776  | 0.038376184 |
| 0.010352709 | 0.038388989 |
| 0.010361559 | 0.038416251 |
| 0.010368829 | 0.038437649 |
| 0.01037761  | 0.038464642 |
| 0.010380439 | 0.038469566 |
| 0.01038772  | 0.038490991 |
| 0.010405565 | 0.038551545 |
| 0.010421114 | 0.038603577 |
| 0.010431756 | 0.038637417 |
| 0.010441699 | 0.03866866  |
| 0.010448375 | 0.038687799 |
| 0.010469558 | 0.038760635 |
| 0.010472421 | 0.038765642 |
| 0.010476316 | 0.038774461 |
| 0.010488714 | 0.038807178 |
| 0.010489663 | 0.038807178 |
| 0.010489694 | 0.038807178 |
| 0.010494958 | 0.038821051 |
| 0.010497383 | 0.038821746 |



## TAUvsControls

|             |             |
|-------------|-------------|
| 0.010498173 | 0.038821746 |
| 0.010504109 | 0.038838099 |
| 0.010509442 | 0.038852216 |
| 0.010554592 | 0.039013509 |
| 0.010569589 | 0.039063312 |
| 0.010574938 | 0.039077452 |
| 0.010585458 | 0.039110692 |
| 0.010593181 | 0.039133586 |
| 0.010596459 | 0.039140062 |
| 0.01059923  | 0.039144659 |
| 0.010629988 | 0.039252599 |
| 0.010651688 | 0.039327067 |
| 0.010669761 | 0.039388124 |
| 0.010697164 | 0.039479785 |
| 0.010697669 | 0.039479785 |
| 0.010723962 | 0.039571128 |
| 0.010739496 | 0.039622747 |
| 0.010769606 | 0.039728122 |
| 0.01077276  | 0.039734042 |
| 0.01079072  | 0.039794563 |
| 0.010794392 | 0.03980238  |
| 0.010801675 | 0.039823511 |
| 0.01080945  | 0.039844407 |
| 0.01081045  | 0.039844407 |
| 0.010815731 | 0.039858145 |
| 0.010817957 | 0.03986062  |
| 0.010831927 | 0.039906363 |
| 0.010834227 | 0.039909102 |
| 0.010854086 | 0.039976515 |
| 0.01085617  | 0.039978449 |
| 0.010865423 | 0.040006783 |
| 0.010871396 | 0.040023028 |
| 0.010873197 | 0.040023914 |
| 0.010881555 | 0.040048931 |
| 0.010883209 | 0.040049271 |
| 0.010897388 | 0.040095698 |
| 0.01090139  | 0.040104669 |
| 0.010912308 | 0.040139079 |
| 0.010917708 | 0.040153181 |
| 0.010922434 | 0.040163765 |
| 0.010924284 | 0.040163765 |
| 0.010925283 | 0.040163765 |
| 0.010929957 | 0.040175189 |
| 0.010932337 | 0.040178179 |
| 0.010941091 | 0.040204592 |
| 0.010943658 | 0.040204696 |
| 0.010944255 | 0.040204696 |
| 0.010953504 | 0.040232912 |
| 0.010996247 | 0.040384126 |
| 0.010999689 | 0.040390985 |
| 0.011012332 | 0.040428247 |

## TAUvsControls

|             |             |
|-------------|-------------|
| 0.011012989 | 0.040428247 |
| 0.011022858 | 0.040458686 |
| 0.011033383 | 0.040491521 |
| 0.01104464  | 0.040527034 |
| 0.01105407  | 0.040555835 |
| 0.011060419 | 0.040573325 |
| 0.011065557 | 0.040586367 |
| 0.011075836 | 0.040612917 |
| 0.011075962 | 0.040612917 |
| 0.011078288 | 0.04061564  |
| 0.011086011 | 0.040638145 |
| 0.011098584 | 0.040678421 |
| 0.011109333 | 0.040712    |
| 0.011124172 | 0.040760556 |
| 0.011128621 | 0.040771034 |
| 0.011141256 | 0.040811492 |
| 0.011148806 | 0.040833319 |
| 0.01115477  | 0.040846268 |
| 0.011155527 | 0.040846268 |
| 0.011159824 | 0.04085617  |
| 0.01117696  | 0.040911106 |
| 0.01117802  | 0.040911106 |
| 0.011183671 | 0.040925951 |
| 0.011200635 | 0.040982181 |
| 0.011212748 | 0.041015312 |
| 0.011212888 | 0.041015312 |
| 0.011221047 | 0.041034718 |
| 0.011221393 | 0.041034718 |
| 0.011223166 | 0.041035349 |
| 0.011241811 | 0.041097665 |
| 0.011246587 | 0.041109266 |
| 0.011249859 | 0.041115364 |
| 0.011268495 | 0.041177607 |
| 0.011272749 | 0.041187286 |
| 0.011300558 | 0.041282959 |
| 0.011302154 | 0.041282959 |
| 0.011320232 | 0.041343104 |
| 0.01132442  | 0.041352512 |
| 0.011338894 | 0.041399473 |
| 0.011347296 | 0.041424253 |
| 0.011351301 | 0.041432976 |
| 0.011370125 | 0.04149578  |
| 0.011403429 | 0.041605518 |
| 0.011403438 | 0.041605518 |
| 0.011405139 | 0.041605803 |
| 0.0114157   | 0.041638409 |
| 0.011421346 | 0.041653078 |
| 0.011442179 | 0.041723123 |
| 0.011469842 | 0.041818048 |
| 0.011471827 | 0.041819342 |
| 0.011474697 | 0.04182386  |

## TAUvsControls

|             |             |
|-------------|-------------|
| 0.011489189 | 0.041870731 |
| 0.011495646 | 0.04188831  |
| 0.011498229 | 0.041891772 |
| 0.011501431 | 0.041894046 |
| 0.01150212  | 0.041894046 |
| 0.01150477  | 0.04189775  |
| 0.01152829  | 0.041977442 |
| 0.011530084 | 0.041978017 |
| 0.011534559 | 0.04198835  |
| 0.011553644 | 0.042051853 |
| 0.0115632   | 0.042080662 |
| 0.011567457 | 0.042087548 |
| 0.011568373 | 0.042087548 |
| 0.011580404 | 0.042125343 |
| 0.011595184 | 0.042173123 |
| 0.011610746 | 0.042223739 |
| 0.011646381 | 0.042347324 |
| 0.01165666  | 0.042375103 |
| 0.011657325 | 0.042375103 |
| 0.01166847  | 0.042409606 |
| 0.011674278 | 0.042424561 |
| 0.011675893 | 0.042424561 |
| 0.011686353 | 0.042456553 |
| 0.011695109 | 0.042482346 |
| 0.011698946 | 0.042490268 |
| 0.01170604  | 0.042510013 |
| 0.01172342  | 0.042567099 |
| 0.011734141 | 0.042599997 |
| 0.011737441 | 0.042605949 |
| 0.01174667  | 0.042633414 |
| 0.011749746 | 0.042638546 |
| 0.011755567 | 0.042653636 |
| 0.011798959 | 0.04280502  |
| 0.011807434 | 0.042829711 |
| 0.011818567 | 0.042864032 |
| 0.0118295   | 0.042897616 |
| 0.011835031 | 0.042911607 |
| 0.0118596   | 0.042991378 |
| 0.011860568 | 0.042991378 |
| 0.01186206  | 0.042991378 |
| 0.011883137 | 0.04306168  |
| 0.011896275 | 0.0431032   |
| 0.011898834 | 0.043106385 |
| 0.011905378 | 0.043123999 |
| 0.011909476 | 0.043132754 |
| 0.011935683 | 0.043217017 |
| 0.011936112 | 0.043217017 |
| 0.011959622 | 0.043296025 |
| 0.011972212 | 0.043335486 |
| 0.011978782 | 0.04335315  |
| 0.011994854 | 0.043405192 |

## TAUvsControls

|             |             |
|-------------|-------------|
| 0.01199737  | 0.043408174 |
| 0.012002039 | 0.043418943 |
| 0.012005344 | 0.043424774 |
| 0.012028081 | 0.043500883 |
| 0.012038865 | 0.043533744 |
| 0.012047343 | 0.043558259 |
| 0.012053918 | 0.043575891 |
| 0.01208203  | 0.043671362 |
| 0.01209013  | 0.043694482 |
| 0.012111859 | 0.043761936 |
| 0.012112206 | 0.043761936 |
| 0.012117607 | 0.043775281 |
| 0.012144365 | 0.043865768 |
| 0.012155833 | 0.043901008 |
| 0.01215816  | 0.043903231 |
| 0.012179079 | 0.04397258  |
| 0.012206526 | 0.044065473 |
| 0.012208377 | 0.044065954 |
| 0.012210821 | 0.044068107 |
| 0.01221241  | 0.044068107 |
| 0.012235317 | 0.044144557 |
| 0.012250412 | 0.044192803 |
| 0.012258408 | 0.044215429 |
| 0.012292721 | 0.044332959 |
| 0.012297937 | 0.044345535 |
| 0.012306259 | 0.044369307 |
| 0.012313454 | 0.044389006 |
| 0.012320307 | 0.044407468 |
| 0.012338015 | 0.044465047 |
| 0.01234588  | 0.044487142 |
| 0.012368773 | 0.044560088 |
| 0.012369598 | 0.044560088 |
| 0.012372476 | 0.044564195 |
| 0.012376766 | 0.044573389 |
| 0.01238334  | 0.044590803 |
| 0.012408819 | 0.044676276 |
| 0.01241159  | 0.044679983 |
| 0.012443774 | 0.044789555 |
| 0.012452235 | 0.044813718 |
| 0.012459723 | 0.044834376 |
| 0.012467377 | 0.044850702 |
| 0.012467757 | 0.044850702 |
| 0.012475794 | 0.044873318 |
| 0.012491398 | 0.044923144 |
| 0.012494223 | 0.044926127 |
| 0.012495731 | 0.044926127 |
| 0.012499006 | 0.044930537 |
| 0.012500461 | 0.044930537 |
| 0.012502833 | 0.044932769 |
| 0.012513221 | 0.044963801 |
| 0.012516922 | 0.044966177 |

## TAUvsControls

|             |             |
|-------------|-------------|
| 0.012517389 | 0.044966177 |
| 0.012522267 | 0.044977403 |
| 0.012529629 | 0.044997543 |
| 0.012539661 | 0.045027267 |
| 0.012553843 | 0.045071881 |
| 0.012556082 | 0.045073612 |
| 0.012558306 | 0.045075284 |
| 0.012563234 | 0.045086663 |
| 0.012571746 | 0.0451109   |
| 0.012573705 | 0.045111618 |
| 0.012578754 | 0.045120063 |
| 0.012579577 | 0.045120063 |
| 0.012590288 | 0.045152168 |
| 0.012594893 | 0.045162368 |
| 0.012599125 | 0.045167868 |
| 0.012599949 | 0.045167868 |
| 0.012621916 | 0.045240291 |
| 0.012630305 | 0.045264034 |
| 0.012658953 | 0.045360364 |
| 0.012671007 | 0.045397214 |
| 0.01267752  | 0.045414206 |
| 0.01268948  | 0.045450701 |
| 0.012699262 | 0.045479386 |
| 0.012713159 | 0.045522801 |
| 0.012732246 | 0.045584782 |
| 0.012737009 | 0.045595472 |
| 0.012740945 | 0.045603195 |
| 0.012744947 | 0.045611153 |
| 0.012752919 | 0.045633316 |
| 0.012755016 | 0.045634456 |
| 0.01276     | 0.045643193 |
| 0.012761017 | 0.045643193 |
| 0.0127693   | 0.04566645  |
| 0.012807085 | 0.045792225 |
| 0.01280804  | 0.045792225 |
| 0.012814556 | 0.045803472 |
| 0.012814758 | 0.045803472 |
| 0.012819999 | 0.045815821 |
| 0.012835396 | 0.045864458 |
| 0.012842695 | 0.045884145 |
| 0.01286383  | 0.045947923 |
| 0.012865046 | 0.045947923 |
| 0.01286592  | 0.045947923 |
| 0.01287408  | 0.045970663 |
| 0.012904949 | 0.046069407 |
| 0.012905325 | 0.046069407 |
| 0.012909819 | 0.046079035 |
| 0.012943806 | 0.046193916 |
| 0.012946079 | 0.046195602 |
| 0.012950525 | 0.046205039 |
| 0.012956443 | 0.046219722 |

## TAUvsControls

|             |             |
|-------------|-------------|
| 0.01296155  | 0.04623151  |
| 0.012970889 | 0.046258388 |
| 0.01298098  | 0.046287939 |
| 0.012986442 | 0.04630098  |
| 0.012993112 | 0.046318322 |
| 0.013007092 | 0.046357433 |
| 0.013007698 | 0.046357433 |
| 0.013025825 | 0.046415585 |
| 0.01302891  | 0.046416606 |
| 0.013029731 | 0.046416606 |
| 0.013040844 | 0.046448192 |
| 0.013042219 | 0.046448192 |
| 0.013046262 | 0.046456138 |
| 0.0130609   | 0.04650181  |
| 0.013075239 | 0.046546399 |
| 0.013077886 | 0.046549362 |
| 0.013079919 | 0.046550139 |
| 0.013084812 | 0.046558308 |
| 0.013085845 | 0.046558308 |
| 0.013092114 | 0.046574151 |
| 0.013108281 | 0.046625198 |
| 0.013118847 | 0.046656311 |
| 0.013127351 | 0.046680081 |
| 0.013139964 | 0.046718454 |
| 0.013147712 | 0.046739523 |
| 0.013150563 | 0.04674318  |
| 0.013163729 | 0.046783496 |
| 0.013188272 | 0.046864225 |
| 0.013198644 | 0.046894588 |
| 0.013215945 | 0.046949552 |
| 0.013232745 | 0.047002725 |
| 0.013236803 | 0.047009789 |
| 0.013238399 | 0.047009789 |
| 0.013248204 | 0.047028212 |
| 0.013248543 | 0.047028212 |
| 0.013249088 | 0.047028212 |
| 0.013258529 | 0.047055212 |
| 0.01326546  | 0.047073297 |
| 0.013271829 | 0.047086716 |
| 0.013272913 | 0.047086716 |
| 0.013328251 | 0.047273799 |
| 0.013329335 | 0.047273799 |
| 0.013338861 | 0.047301042 |
| 0.01334707  | 0.047323611 |
| 0.0133582   | 0.047356528 |
| 0.013403751 | 0.047511446 |
| 0.013411018 | 0.047530633 |
| 0.013429077 | 0.047588061 |
| 0.013454772 | 0.047669926 |
| 0.013456024 | 0.047669926 |
| 0.013457754 | 0.047669926 |

## TAUvsControls

|             |             |
|-------------|-------------|
| 0.013517889 | 0.047876324 |
| 0.013598507 | 0.048149465 |
| 0.013598765 | 0.048149465 |
| 0.013628789 | 0.048249112 |
| 0.013633361 | 0.048258635 |
| 0.013637369 | 0.048266161 |
| 0.013646752 | 0.048284493 |
| 0.013647048 | 0.048284493 |
| 0.013648196 | 0.048284493 |
| 0.013653176 | 0.048295452 |
| 0.013658867 | 0.048308919 |
| 0.013686883 | 0.048401333 |
| 0.013727441 | 0.048538065 |
| 0.013732701 | 0.048549971 |
| 0.013735709 | 0.048553914 |
| 0.013753589 | 0.048601877 |
| 0.01375414  | 0.048601877 |
| 0.013754962 | 0.048601877 |
| 0.013761429 | 0.048612532 |
| 0.013761768 | 0.048612532 |
| 0.013780295 | 0.048671274 |
| 0.013795923 | 0.048719762 |
| 0.0138038   | 0.048740868 |
| 0.013849612 | 0.048895899 |
| 0.013853148 | 0.048901649 |
| 0.013860039 | 0.048917864 |
| 0.013861556 | 0.048917864 |
| 0.01386643  | 0.048927235 |
| 0.013868026 | 0.048927235 |
| 0.013871038 | 0.04893113  |
| 0.013893662 | 0.049004198 |
| 0.013904905 | 0.04903711  |
| 0.013927702 | 0.049110753 |
| 0.013934223 | 0.049126995 |
| 0.013936311 | 0.049127604 |
| 0.013952577 | 0.049178185 |
| 0.01395692  | 0.049186734 |
| 0.013968125 | 0.049219457 |
| 0.013971471 | 0.049224487 |
| 0.013985354 | 0.049260542 |
| 0.013985595 | 0.049260542 |
| 0.013987467 | 0.049260542 |
| 0.013992593 | 0.049271833 |
| 0.014007251 | 0.049316675 |
| 0.014017302 | 0.049345288 |
| 0.014027881 | 0.049375753 |
| 0.014045598 | 0.049430163 |
| 0.014047193 | 0.049430163 |
| 0.014051152 | 0.049437312 |
| 0.014056379 | 0.049448918 |
| 0.014067655 | 0.049475071 |

TAUvsControls

|             |             |
|-------------|-------------|
| 0.014069139 | 0.049475071 |
| 0.014070302 | 0.049475071 |
| 0.014071529 | 0.049475071 |
| 0.014081271 | 0.04950254  |
| 0.014102621 | 0.049570799 |
| 0.014113917 | 0.049595781 |
| 0.014114996 | 0.049595781 |
| 0.014115529 | 0.049595781 |
| 0.014145925 | 0.049695773 |
| 0.01415884  | 0.049734331 |
| 0.014162067 | 0.049738856 |
| 0.014178329 | 0.049789151 |
| 0.01418696  | 0.049812639 |
| 0.014211084 | 0.049890513 |
| 0.014219001 | 0.049911477 |
